# Supplementary material for: Carbon Atom Insertion into Pyrroles and Indoles Promoted by Chlorodiazirines
Source: PubMed Central journal article supplement (PMC8343525; doi:10.1021/jacs.1c06287), 2021-07-21
Supplement: ja1c06287_si_002.pdf [file ja1c06287_si_002.pdf]

## Supporting Information 2

### Carbon Atom Insertion into Pyrroles and Indoles Promoted by Chlorodiazirines

#### Computational Details

Balu D. Dherange<sup>1</sup>, Patrick Q. Kelly<sup>1</sup>, Jordan P. Liles<sup>2</sup>, Matthew S. Sigman<sup>2</sup>, and Mark D. Levin<sup>1,\*</sup>

<sup>1</sup>Department of Chemistry, University of Chicago, Chicago, IL 60637, United States

<sup>2</sup> Department of Chemistry, University of Utah, Salt Lake City, Utah 84112, United States

#### Contents

|                                                                                    |       |
|------------------------------------------------------------------------------------|-------|
| 1. Computational Methods.....                                                      | S2-2  |
| 2. Triplet energies and azabenzvalene pathway for 2,5-dimethylpyrrole (4a) .....   | S2-3  |
| 3. Energy pathway and predicted selectivity for 2-phenyl-5-methylpyrrole (4f)..... | S2-4  |
| 4. Plausible mechanism for para-insertion (5t').....                               | S2-4  |
| 5. Select computed parameters.....                                                 | S2-6  |
| 6. Scan of $V_{bur}$ radius.....                                                   | S2-7  |
| 7. References.....                                                                 | S2-7  |
| 8. Coordinates for transition states on the energy pathway of product 5a.....      | S2-9  |
| 9. Coordinates for compounds on the energy pathway of product 5f/5f'.....          | S2-22 |
| 10. Coordinates for compounds on the energy pathway of product 5t/5t' .....        | S2-40 |
| 11. Coordinates for pyrroles used in the steric regioselectivity model.....        | S2-80 |

## 1. Computational Methods

Conformational searches were conducted for the pyrroles used in the steric model with Macromodel version 11.8.012<sup>1</sup> and the OPLS3e force field.<sup>2</sup> Conformers within 10 kcal/mol of the minimum (typically 1-100) were used as starting coordinates for geometry optimization conducted using density functional theory (DFT) in Gaussian16 (Revision A.03).<sup>3</sup> Each of the **pyrroles in the steric model** were optimized using the polarizable continuum model (PCM) in acetonitrile (MeCN) at the B3LYPD3BJ/6-31g(d) level of theory. Single point energy calculations were conducted using PCM(MeCN) at the M062x/def2TZVP level and used to collect molecular descriptors.

Energies for the **transition states** were calculated using PCM(MeCN)-B3LYPD3BJ/6-311+g(d,p)//PCM(MeCN)-B3LYPD3BJ/6-31g(d) and were optimized without constraints except TS1-exoC2 for 2,5-dimethylpyrrole (5a). This transition state was optimized constraining the carbene-C2 distance taken from the B3LYPD3/6-31g(d) optimized geometry.

All of the optimized geometries were verified by frequency calculations as ground states (zero imaginary frequencies) or transition states (one imaginary frequency). Any conformers that did not optimize to true minima were discarded (<0.5% of all conformers). Transition states were verified by intrinsic reaction coordinate (IRC) calculations. Quasi-harmonic corrected free energies (Gtz) for each compound were computed using Grimme entropic corrections<sup>4</sup> and Head-Gordon enthalpic corrections<sup>5</sup> as implemented in Paton's GoodVibes python package.<sup>6</sup> Nucleus independent chemical shift (NICS0)<sup>7</sup> values were computed by the negative calculated chemical shift of a ghost atom placed at the center of the five pyrrole atoms (calculated as the cartesian coordinate average) using the Gauge-Independent Atomic Orbital (GIAO) method<sup>8-12</sup> with B3LYP/6-311+g(d,p). Buried volume parameters were computed using Paton's DBStep<sup>13</sup> program with C3 and C4 defined using IUPAC naming conventions. Differences in buried volume were visualized using Blender.<sup>14</sup>

## 2. Triplet energies and azabenzvalene pathway for 2,5-dimethylpyrrole (4a)

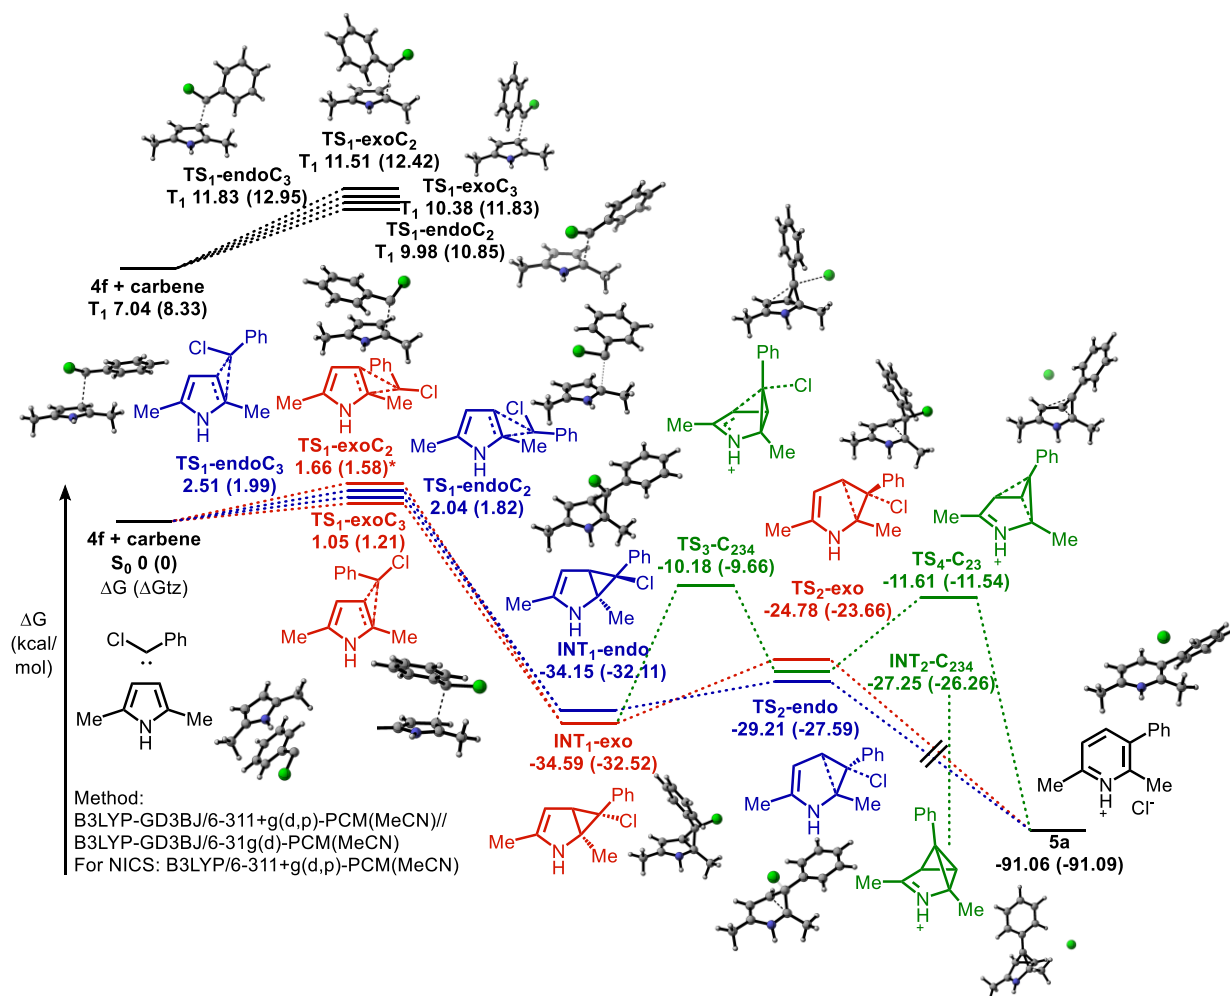

Fig S1: Triplet energies for the  $\alpha$ -halocarbene and triplet cyclopropanation energies are significantly higher than the singlet pathway, as supported by previous works.<sup>15–17</sup> Azabenzvalene ring walking is not energetically competitive with ring opening, even when the ring opening is electronically forbidden.

### 3. Energy pathway and predicted selectivity for 2-phenyl-5-methylpyrrole (4f)

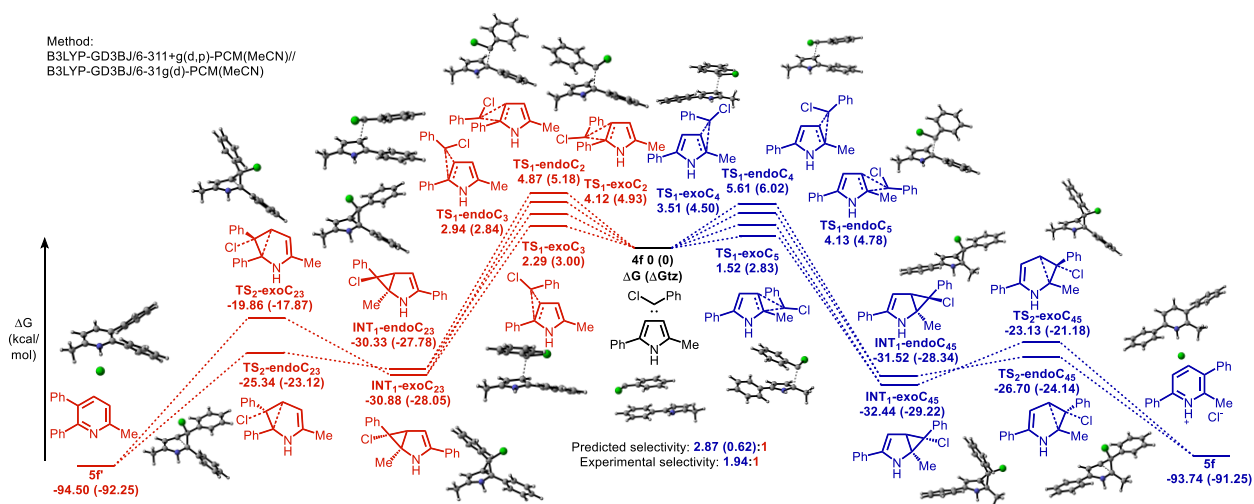

Fig. S2: Boltzmann weighting of the cyclopropanation transition states predicts the selectivity of 2-phenyl-5-methylpyrrole to be 2.87:1, near the experimental value of 1.94:1.

### 4. Plausible mechanism for para-insertion (5t')

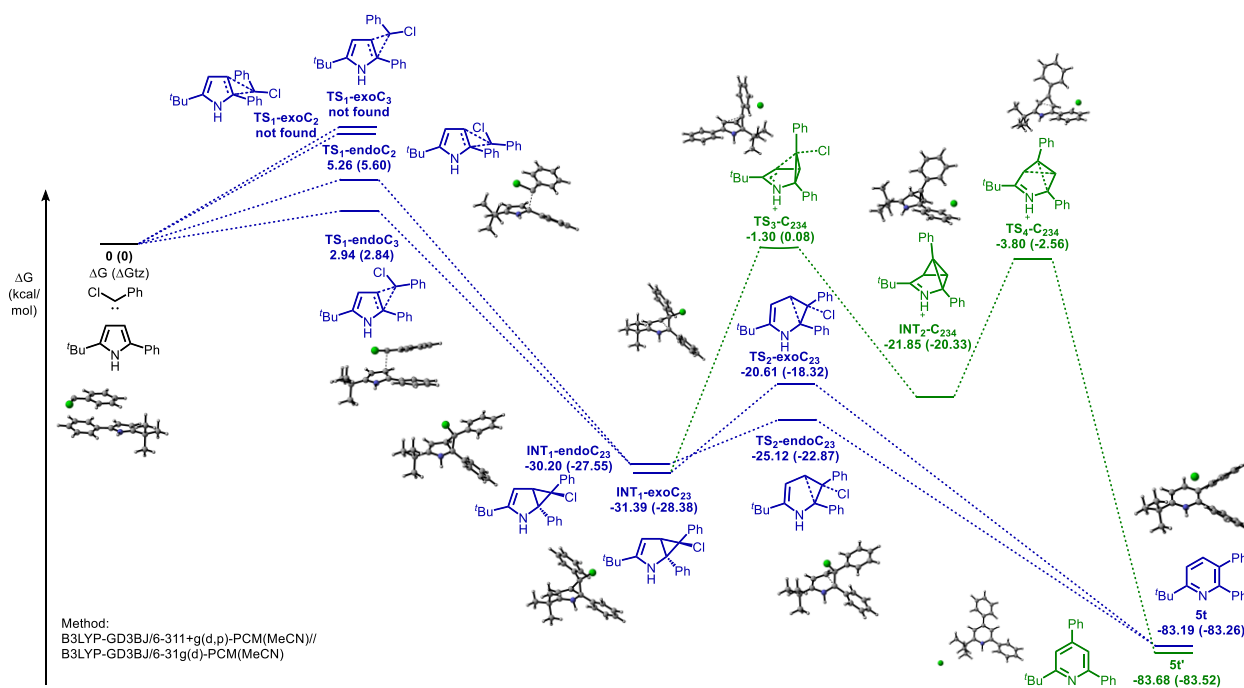

Fig. S3: formation of meta-insertion product 5t' follows same pathway as others, although exo-Cl cyclopropanation appears difficult due to steric interaction between carbene aryl ring and pyrrole *tert*-butyl group. Azabenzvalene walking appears noncompetitive with ring opening to meta insertion.

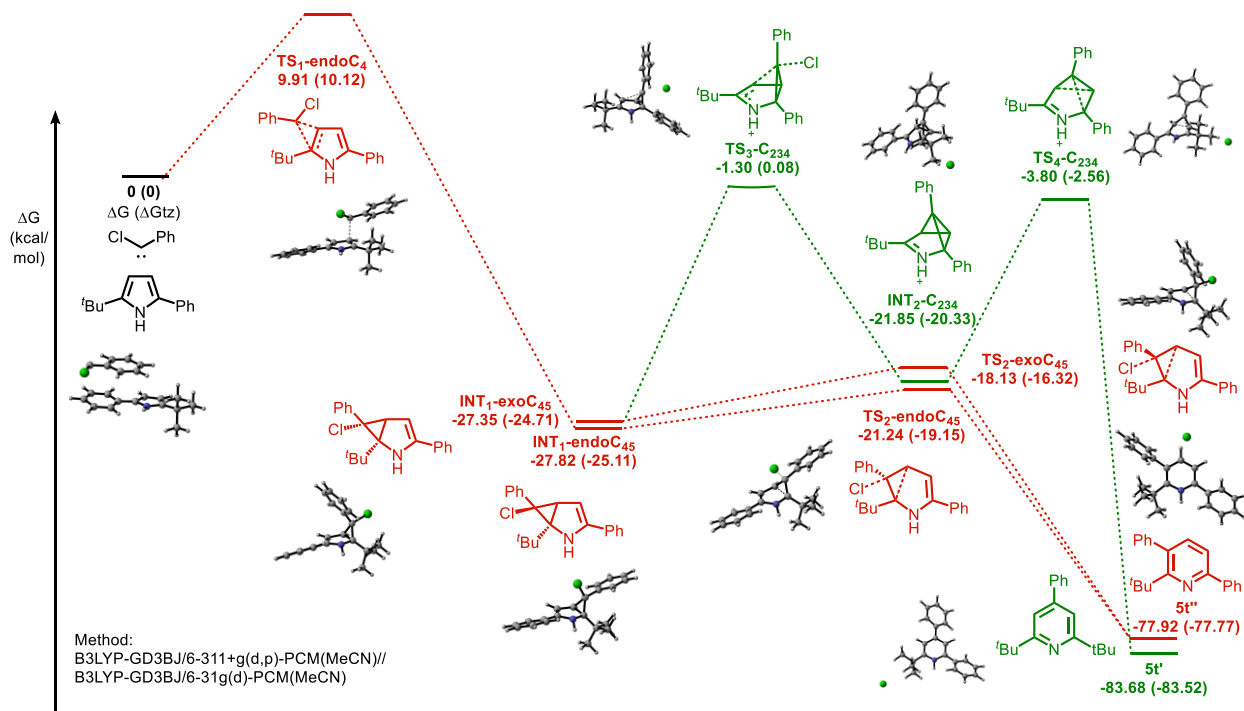

Fig. S4: The azabenzvalene formation appears noncompetitive with electrocyclic ring opening.

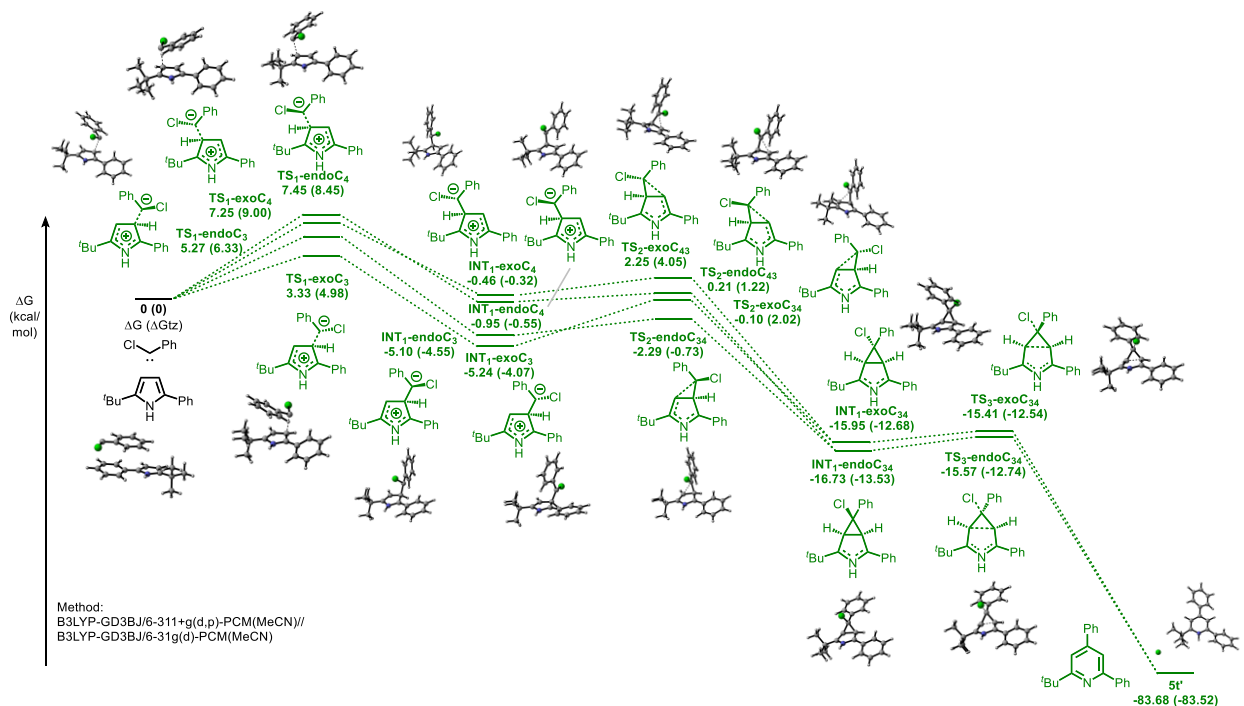

Fig. S6: Direct cyclopropanation between C3 and C4 is energetically competitive with cyclopropanation at the other positions of the pyrrole.

## 5. Select computed parameters

| Substrate | Regioselectivity<br>(C5/C2) | log<br>(Regioselectivity) | C3R3.75_Boltz-<br>C4R3.75_Boltz | ChelpG<br>((C2+C3)-<br>(C4+C5)) | calculated<br>NMR<br>((C2+C3)-<br>(C4+C5)) | Sterimol L<br>((C2+C3)-<br>(C4+C5)) | Sterimol B1<br>((C2+C3)-<br>(C4+C5)) | Sterimol B5<br>((C2+C3)-<br>(C4+C5)) |
|-----------|-----------------------------|---------------------------|---------------------------------|---------------------------------|--------------------------------------------|-------------------------------------|--------------------------------------|--------------------------------------|
| 4a        | 1.00                        | 0.000                     | 0.000                           | 0.000                           | 0.000                                      | 0.000                               | 0.000                                | 0.000                                |
| 4b        | 0.05                        | -1.301                    | -6.873                          | -0.218                          | 13.825                                     | 11.410                              | 4.260                                | 11.460                               |
| 4c        | 20.00                       | 1.301                     | 10.094                          | 0.137                           | -12.208                                    | 7.570                               | 0.610                                | 3.320                                |
| 4d        | 20.00                       | 1.301                     | 6.032                           | 0.087                           | -15.563                                    | 3.802                               | 0.631                                | 3.317                                |
| 4e        | 20.00                       | 1.301                     | 8.378                           | 0.170                           | -13.362                                    | 7.680                               | 0.687                                | 7.262                                |
| 4f        | 1.90                        | 0.279                     | 2.684                           | -0.100                          | 2.717                                      | 3.270                               | 0.000                                | 1.160                                |
| 4g        | 1.50                        | 0.176                     | 2.655                           | -0.065                          | 2.691                                      | 5.358                               | 0.104                                | 1.156                                |
| 4h        | 2.10                        | 0.322                     | 2.686                           | -0.136                          | 6.193                                      | 5.230                               | 0.000                                | 1.170                                |
| 4i        | 2.00                        | 0.301                     | 2.684                           | -0.100                          | 2.717                                      | 3.270                               | 0.000                                | 1.160                                |
| 4j        | 1.30                        | 0.114                     | 2.684                           | -0.100                          | 2.717                                      | 3.270                               | 0.000                                | 1.160                                |
| 4k        | 1.20                        | 0.079                     | 2.684                           | -0.100                          | 2.717                                      | 3.270                               | 0.000                                | 1.160                                |
| 4l        | 2.40                        | 0.380                     | 4.547                           | 0.197                           | -12.201                                    | 1.030                               | 0.610                                | 1.030                                |
| 4m        | 1.10                        | 0.041                     | 0.694                           | -0.032                          | 7.502                                      | 2.175                               | 0.000                                | 0.025                                |
| 4n        | 0.38                        | -0.415                    | -1.467                          | -0.019                          | 11.659                                     | 2.208                               | -0.302                               | 0.002                                |
| 4o        | 1.00                        | 0.000                     | -0.534                          | 0.056                           | 13.007                                     | 0.703                               | 0.027                                | -1.216                               |
| 4q        | 9.00                        | 0.954                     | 6.219                           | -0.010                          | -4.445                                     | 4.030                               | 0.965                                | 6.050                                |
| 4s        | 0.05                        | -1.301                    | -6.380                          | 0.049                           | 17.481                                     | 14.409                              | 4.934                                | 14.266                               |
| 4u        | 1.00                        | 0.000                     | -0.001                          | 0.000                           | 0.001                                      | 0.000                               | 0.000                                | 0.000                                |
| 4t        | 0.10                        | -1.018                    | -3.233                          | 0.038                           | 14.081                                     | 2.240                               | -1.150                               | 0.000                                |
| 4p        | 0.33                        | -0.477                    | 7.395                           | 0.050                           | -4.589                                     | 2.733                               | 1.074                                | 4.831                                |
| 4r        | 0.05                        | -1.301                    | 1.664                           | 0.120                           | 16.073                                     | 1.129                               | -0.193                               | -2.404                               |

Table S1: Select computed molecular descriptors from pyrrole ground states. Verloop sterimol values<sup>18</sup> were computed using a modified version of Paton's sterimol package.<sup>19</sup>

## 6. Scan of $V_{bur}$ radius

Using Paton's DBStep<sup>13</sup> python package, buried volume parameters were computed using spheres of various radii. Initially,  $V_{bur}$  was calculated about C3 and C4 of the pyrrole using radii from 2.0 to 5.0 angstroms with 0.25 Å increments. A finer scan with a smaller increment (0.1 Å) was also performed from 3.4 to 4.2 Å in an attempt to further optimize the correlation. Ultimately, it was decided that a radius of 3.75 Å would be used.

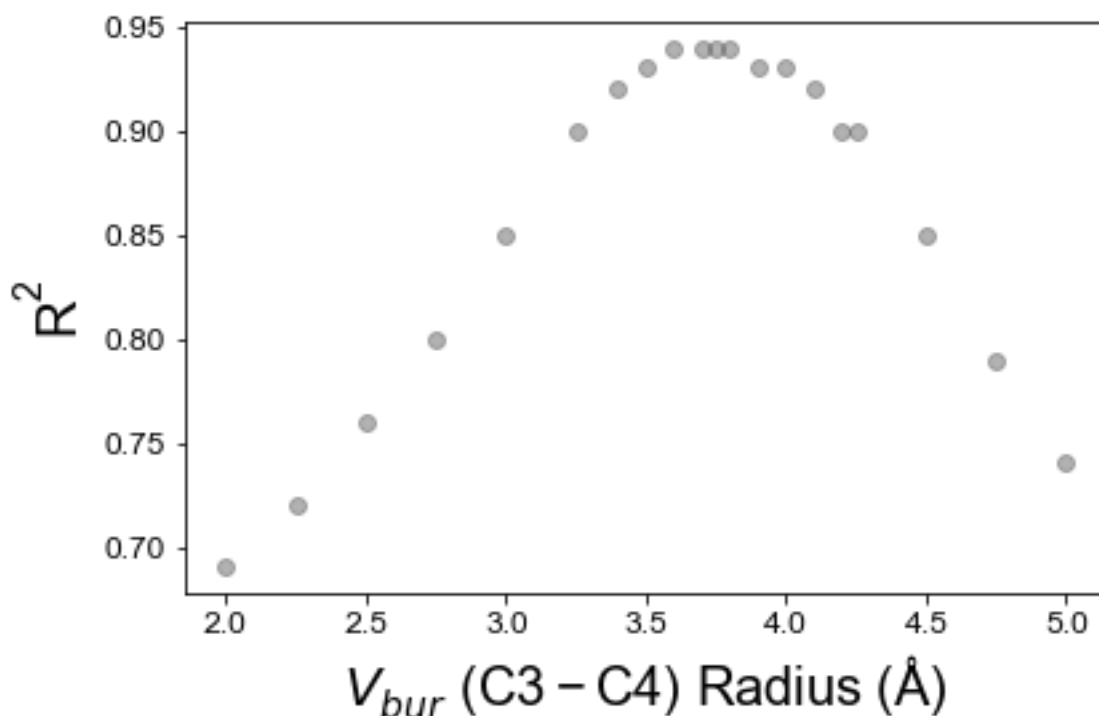

## 7. References

- (1) *MacroModel*; Schrödinger, LLC, New York, NY, 2021.
- (2) Roos, K.; Wu, C.; Damm, W.; Reboul, M.; Stevenson, J. M.; Lu, C.; Dahlgren, M. K.; Mondal, S.; Chen, W.; Wang, L.; Abel, R.; Friesner, R. A.; Harder, E. D. OPLS3e: Extending Force Field Coverage for Drug-Like Small Molecules. *J. Chem. Theory Comput.* **2019**, *15* (3), 1863–1874. <https://doi.org/10.1021/acs.jctc.8b01026>.
- (3) M. J. Frisch, G. W. Trucks, H. B. Schlegel, G. E. Scuseria,; M. A. Robb, J. R. Cheeseman, G. Scalmani, V. Barone,; G. A. Petersson, H. Nakatsuji, X. Li, M. Caricato, A. V. Marenich,; J. Bloino, B. G. Janesko, R. Gomperts, B. Mennucci, H. P. Hratchian,; J. V. Ortiz, A. F. Izmaylov, J. L. Sonnenberg, D. Williams-Young,; F. Ding, F. Lipparini, F. Egidi, J. Goings, B. Peng, A. Petrone,; T. Henderson, D. Ranasinghe, V. G. Zakrzewski, J. Gao, N. Rega,; G. Zheng, W. Liang, M. Hada, M. Ehara, K. Toyota, R. Fukuda,; J. Hasegawa, M. Ishida, T. Nakajima, Y. Honda, O. Kitao, H. Nakai,; T. Vreven, K. Throssell, J. A. Montgomery, Jr., J. E. Peralta,; F. Ogliaro, M. J. Bearpark, J.

J. Heyd, E. N. Brothers, K. N. Kudin,; V. N. Staroverov, T. A. Keith, R. Kobayashi, J. Normand,; K. Raghavachari, A. P. Rendell, J. C. Burant, S. S. Iyengar,; J. Tomasi, M. Cossi, J. M. Millam, M. Klene, C. Adamo, R. Cammi,; J. W. Ochterski, R. L. Martin, K. Morokuma, O. Farkas,; J. B. Foresman, and D. J. Fox. *Gaussian 16, Revision A.03*; Gaussian Inc.: Wallingford CT, 2016.

(4) Grimme, S. Supramolecular Binding Thermodynamics by Dispersion-Corrected Density Functional Theory. *Chem. – Eur. J.* **2012**, *18* (32), 9955–9964. <https://doi.org/10.1002/chem.201200497>.

(5) Li, Y.-P.; Gomes, J.; Mallikarjun Sharada, S.; Bell, A. T.; Head-Gordon, M. Improved Force-Field Parameters for QM/MM Simulations of the Energies of Adsorption for Molecules in Zeolites and a Free Rotor Correction to the Rigid Rotor Harmonic Oscillator Model for Adsorption Enthalpies. *J. Phys. Chem. C* **2015**, *119* (4), 1840–1850. <https://doi.org/10.1021/jp509921r>.

(6) Luchini, G.; Alegre-Requena, J. V.; Funes-Ardoiz, I.; Paton, R. S. GoodVibes: Automated Thermochemistry for Heterogeneous Computational Chemistry Data. *F1000Research* **2020**, *9*, 291. <https://doi.org/10.12688/f1000research.22758.1>.

(7) Chen, Z.; Wannere, C. S.; Corminboeuf, C.; Puchta, R.; Schleyer, P. von R. Nucleus-Independent Chemical Shifts (NICS) as an Aromaticity Criterion. *Chem. Rev.* **2005**, *105* (10), 3842–3888. <https://doi.org/10.1021/cr030088+>.

(8) London, F. Théorie Quantique Des Courants Interatomiques Dans Les Combinaisons Aromatiques. *J. Phys. Radium* **1937**, *8* (10), 397–409. <https://doi.org/10.1051/jphysrad:01937008010039700>.

(9) McWeeny, R. Perturbation Theory for the Fock-Dirac Density Matrix. *Phys Rev* **1962**, *126* (3), 1028–1034. <https://doi.org/10.1103/PhysRev.126.1028>.

(10) Ditchfield, R. Self-Consistent Perturbation Theory of Diamagnetism. *Mol. Phys.* **1974**, *27* (4), 789–807. <https://doi.org/10.1080/00268977400100711>.

(11) Wolinski, K.; Hinton, J. F.; Pulay, P. Efficient Implementation of the Gauge-Independent Atomic Orbital Method for NMR Chemical Shift Calculations. *J. Am. Chem. Soc.* **1990**, *112* (23), 8251–8260. <https://doi.org/10.1021/ja00179a005>.

(12) Cheeseman, J. R.; Trucks, G. W.; Keith, T. A.; Frisch, M. J. A Comparison of Models for Calculating Nuclear Magnetic Resonance Shielding Tensors. *J. Chem. Phys.* **1996**, *104* (14), 5497–5509. <https://doi.org/10.1063/1.471789>.

(13) Guilian Luchini; Lab, R. P. / P. *Bobbypaton/DBSTEP: 1.2-Alpha Release*; Zenodo, 2021. <https://doi.org/10.5281/ZENODO.4702097>.

(14) Community, B. O. *Blender - a 3D Modelling and Rendering Package*; Blender Foundation: Stichting Blender Foundation, Amsterdam, 2018.



- (15) Moss, R. A.; Lu, Z.; Sauers, R. R. Triplet Halocarbene Chemistry: P-Nitrophenylchlorocarbene and p-Nitrophenylbromocarbene. *Tetrahedron Lett.* **2010**, *51* (45), 5940–5942. <https://doi.org/10.1016/j.tetlet.2010.09.018>.
- (16) Moss, R. A.; Turro, N. J. Laser Flash Photolytic Studies of Arylhalocarbenes. In *Kinetics and Spectroscopy of Carbenes and Biradicals*; Platz, M. S., Ed.; Springer US: Boston, MA, 1990; pp 213–238. [https://doi.org/10.1007/978-1-4899-3707-0\\_7](https://doi.org/10.1007/978-1-4899-3707-0_7).
- (17) Kable, S. H.; Reid, S. A.; Sears, T. J. The Halocarbenes: Model Systems for Understanding the Spectroscopy, Dynamics and Chemistry of Carbenes. *Int. Rev. Phys. Chem.* **2009**, *28* (3), 435–480. <https://doi.org/10.1080/01442350903087792>.
- (18) Verloop, A. In *Drug Design*; Ariens, E. J., Ed.; Academic Press, 1976; Vol. 3.
- (19) Brethomé, A. V.; Fletcher, S. P.; Paton, R. S. Conformational Effects on Physical-Organic Descriptors: The Case of Sterimol Steric Parameters. *ACS Catal.* **2019**, *9* (3), 2313–2323. <https://doi.org/10.1021/acscatal.8b04043>.

## 8. Coordinates for transition states on the energy pathway of product 5a

2Me-5Me-234azabenzvalene\_23insertion\_ring-opening\_TS

29

|    |          |          |          |
|----|----------|----------|----------|
| C  | 2.03250  | 0.80490  | -0.35629 |
| C  | 2.83056  | -0.25610 | -0.65480 |
| N  | 2.46794  | -1.36535 | 0.08206  |
| H  | 3.17095  | -1.99381 | 0.45668  |
| H  | 1.98395  | 1.74224  | -0.89416 |
| C  | 1.29797  | -1.11214 | 0.82342  |
| C  | 1.05942  | 0.54531  | 0.76554  |
| H  | 0.80454  | 1.30758  | 1.49790  |
| C  | 0.16736  | -0.39037 | 0.20619  |
| C  | -1.19745 | -0.56908 | -0.06726 |
| C  | -2.06302 | 0.55652  | -0.06430 |
| C  | -1.70149 | -1.86088 | -0.37029 |
| C  | -3.40740 | 0.37760  | -0.35033 |
| H  | -1.64788 | 1.54195  | 0.14524  |
| C  | -3.05004 | -2.02338 | -0.63681 |
| H  | -1.02312 | -2.70761 | -0.38326 |
| C  | -3.89850 | -0.90559 | -0.62801 |
| H  | -4.08121 | 1.22797  | -0.35611 |
| H  | -3.45048 | -3.00661 | -0.85898 |
| H  | -4.95425 | -1.03784 | -0.84462 |
| Cl | -0.33090 | 3.73226  | 0.31867  |
| C  | 0.99457  | -2.02073 | 1.98984  |

|   |         |          |          |
|---|---------|----------|----------|
| H | 1.80434 | -1.96981 | 2.72458  |
| H | 0.06586 | -1.72607 | 2.48198  |
| H | 0.89306 | -3.05659 | 1.65041  |
| C | 3.94687 | -0.33516 | -1.64385 |
| H | 3.69847 | -1.01751 | -2.46421 |
| H | 4.15860 | 0.65173  | -2.05982 |
| H | 4.85888 | -0.71204 | -1.16557 |

2Me-5Me-azabenzvalene

29

|    |          |          |          |
|----|----------|----------|----------|
| C  | 1.54291  | -0.13575 | -1.09303 |
| C  | 2.78632  | -0.67471 | -0.51670 |
| N  | 2.68823  | -0.47933 | 0.76597  |
| H  | 3.36538  | -0.75133 | 1.47029  |
| H  | 1.32849  | -0.15588 | -2.15311 |
| C  | 1.38766  | 0.17181  | 1.02926  |
| C  | 1.04539  | 0.99637  | -0.18567 |
| H  | 0.66681  | 1.99990  | -0.37094 |
| C  | 0.41668  | -0.30127 | -0.04109 |
| C  | -0.95277 | -0.82879 | -0.07774 |
| C  | -2.04103 | 0.04716  | -0.19962 |
| C  | -1.17547 | -2.20953 | 0.02922  |
| C  | -3.34083 | -0.45958 | -0.21253 |
| H  | -1.85983 | 1.11668  | -0.28038 |
| C  | -2.47534 | -2.71039 | 0.01248  |
| H  | -0.32770 | -2.88214 | 0.12282  |
| C  | -3.55918 | -1.83518 | -0.10785 |
| H  | -4.18324 | 0.21965  | -0.30537 |
| H  | -2.64493 | -3.77991 | 0.09360  |
| H  | -4.57225 | -2.22672 | -0.11993 |
| Cl | -1.01467 | 3.82903  | -0.41677 |
| C  | 3.91414  | -1.32045 | -1.22082 |
| H  | 4.70946  | -1.62132 | -0.53735 |
| H  | 3.54451  | -2.19872 | -1.76255 |
| H  | 4.31596  | -0.63029 | -1.97097 |
| C  | 1.01258  | 0.49719  | 2.44139  |
| H  | 0.97858  | -0.40730 | 3.05607  |
| H  | 1.72297  | 1.20082  | 2.88524  |
| H  | 0.02128  | 0.95702  | 2.45201  |

2Me-5Me-endoCl\_C2\_cyclopropanation\_TS

29

|    |          |          |          |
|----|----------|----------|----------|
| C  | -1.86270 | -0.27119 | 1.58479  |
| C  | -2.84290 | -0.12139 | 0.60639  |
| N  | -2.44539 | 0.90051  | -0.21281 |
| H  | -2.93319 | 1.18451  | -1.05111 |
| H  | -1.88430 | -1.00829 | 2.37629  |
| C  | -1.19689 | 1.37381  | 0.15379  |
| C  | -0.84700 | 0.66530  | 1.31539  |
| H  | 0.06600  | 0.82110  | 1.87289  |
| C  | 0.23590  | 0.00570  | -1.22541 |
| C  | 1.50380  | -0.17161 | -0.48801 |
| C  | 1.90749  | -1.25281 | 0.32789  |
| C  | 2.41641  | 0.88949  | -0.68081 |
| C  | 3.16139  | -1.26352 | 0.92629  |
| H  | 1.22019  | -2.07521 | 0.49759  |
| C  | 3.67491  | 0.87958  | -0.08041 |
| H  | 2.12001  | 1.71179  | -1.32491 |
| C  | 4.04970  | -0.19692 | 0.72639  |
| H  | 3.45399  | -2.10022 | 1.55509  |
| H  | 4.36231  | 1.70457  | -0.24531 |
| H  | 5.02930  | -0.21123 | 1.19629  |
| Cl | -0.69611 | -1.54050 | -1.29291 |
| C  | -0.68158 | 2.68180  | -0.35581 |
| H  | 0.37352  | 2.79020  | -0.09331 |
| H  | -0.76798 | 2.74330  | -1.44441 |
| H  | -1.23048 | 3.52251  | 0.08889  |
| C  | -4.10810 | -0.87838 | 0.37329  |
| H  | -4.98080 | -0.21317 | 0.36789  |
| H  | -4.08811 | -1.40178 | -0.59061 |
| H  | -4.25141 | -1.62238 | 1.16109  |

2Me-5Me-endoCl\_C2\_cyclopropanation\_TS\_triplet

29

|   |          |          |          |
|---|----------|----------|----------|
| C | -2.61619 | -1.10109 | -1.25542 |
| C | -3.18149 | -0.15159 | -0.41022 |
| N | -2.46246 | -0.17388 | 0.76146  |
| H | -2.59076 | 0.48446  | 1.51701  |
| H | -2.96870 | -1.33348 | -2.25144 |
| C | -1.37810 | -1.02849 | 0.66541  |
| C | -1.52024 | -1.67888 | -0.58404 |
| H | -0.87850 | -2.47140 | -0.94362 |
| C | 0.23818  | 0.50314  | 0.00405  |
| C | 1.62451  | 0.23230  | -0.11388 |
| C | 2.64467  | 1.21916  | 0.01919  |
| C | 2.04120  | -1.10711 | -0.36965 |

|    |          |          |          |
|----|----------|----------|----------|
| C  | 3.98592  | 0.87731  | -0.08810 |
| H  | 2.36090  | 2.24837  | 0.21070  |
| C  | 3.38551  | -1.43225 | -0.47359 |
| H  | 1.28686  | -1.87435 | -0.49838 |
| C  | 4.37218  | -0.44672 | -0.33235 |
| H  | 4.74232  | 1.65037  | 0.02003  |
| H  | 3.67165  | -2.46172 | -0.67139 |
| H  | 5.42329  | -0.70598 | -0.41448 |
| Cl | -0.36154 | 2.13642  | 0.17675  |
| C  | -0.66974 | -1.49399 | 1.90273  |
| H  | 0.28534  | -1.95776 | 1.64775  |
| H  | -0.46704 | -0.65854 | 2.57998  |
| H  | -1.27501 | -2.23233 | 2.44416  |
| C  | -4.31832 | 0.79027  | -0.62068 |
| H  | -4.81112 | 0.57776  | -1.57274 |
| H  | -5.06631 | 0.70659  | 0.17758  |
| H  | -3.97804 | 1.83378  | -0.64081 |

2Me-5Me-endoCl\_C3\_cyclopropanation\_TS

29

|    |          |          |          |
|----|----------|----------|----------|
| C  | 2.46235  | -0.60094 | 1.23284  |
| C  | 3.02384  | -0.37107 | 0.00361  |
| N  | 2.09852  | -0.78280 | -0.95202 |
| H  | 2.23406  | -0.70227 | -1.95036 |
| H  | 2.91946  | -0.37099 | 2.18530  |
| C  | 0.96430  | -1.25891 | -0.36358 |
| C  | 1.13462  | -1.10416 | 1.02205  |
| H  | 0.48097  | -1.52890 | 1.76798  |
| C  | -0.18026 | 0.88766  | 1.08020  |
| C  | -1.45754 | 0.49971  | 0.46330  |
| C  | -2.24575 | -0.35219 | 1.27224  |
| C  | -2.00570 | 0.93987  | -0.76094 |
| C  | -3.51011 | -0.76411 | 0.86927  |
| H  | -1.83733 | -0.67687 | 2.22478  |
| C  | -3.28283 | 0.54740  | -1.15288 |
| H  | -1.42502 | 1.59987  | -1.39582 |
| C  | -4.03473 | -0.31177 | -0.34700 |
| H  | -4.09467 | -1.42466 | 1.50280  |
| H  | -3.69203 | 0.90514  | -2.09346 |
| H  | -5.02775 | -0.62106 | -0.65987 |
| Cl | 0.74923  | 2.01085  | 0.00202  |
| C  | -0.15415 | -1.83370 | -1.15810 |
| H  | -0.62177 | -1.07416 | -1.79891 |
| H  | 0.19669  | -2.64714 | -1.80434 |

|   |          |          |          |
|---|----------|----------|----------|
| H | -0.92755 | -2.22732 | -0.49676 |
| C | 4.33786  | 0.21417  | -0.39070 |
| H | 4.21089  | 1.15427  | -0.94221 |
| H | 4.93449  | 0.42454  | 0.50058  |
| H | 4.91156  | -0.46703 | -1.03173 |

2Me-5Me-endoCl\_C3\_cyclopropanation\_TS\_triplet

29

|    |          |          |          |
|----|----------|----------|----------|
| C  | -2.29905 | -0.12861 | 1.28467  |
| C  | -3.25808 | -0.04817 | 0.31006  |
| N  | -2.82949 | 0.89418  | -0.61886 |
| H  | -3.34429 | 1.15509  | -1.44842 |
| H  | -2.33281 | -0.77949 | 2.14730  |
| C  | -1.62911 | 1.43979  | -0.24850 |
| C  | -1.19887 | 0.73526  | 0.90854  |
| H  | -0.48657 | 1.14618  | 1.61227  |
| C  | 0.30630  | -0.55327 | 0.10056  |
| C  | 1.69659  | -0.26555 | 0.09970  |
| C  | 2.13297  | 1.03635  | 0.48754  |
| C  | 2.70396  | -1.20180 | -0.27744 |
| C  | 3.47947  | 1.36942  | 0.49649  |
| H  | 1.39804  | 1.78092  | 0.77012  |
| C  | 4.04732  | -0.85247 | -0.26421 |
| H  | 2.40782  | -2.20077 | -0.57809 |
| C  | 4.45139  | 0.43174  | 0.12219  |
| H  | 3.77850  | 2.37065  | 0.79483  |
| H  | 4.79141  | -1.58852 | -0.55759 |
| H  | 5.50394  | 0.69805  | 0.12993  |
| Cl | -0.28800 | -2.11187 | -0.43651 |
| C  | -0.90848 | 2.44064  | -1.08249 |
| H  | -1.60016 | 3.00415  | -1.71712 |
| H  | -0.36681 | 3.15532  | -0.45450 |
| H  | -0.16809 | 1.95695  | -1.73554 |
| C  | -4.55542 | -0.76638 | 0.14348  |
| H  | -4.55939 | -1.39048 | -0.75934 |
| H  | -4.73396 | -1.41756 | 1.00297  |
| H  | -5.39918 | -0.06959 | 0.06242  |

2Me-5Me-endoCl\_cyclopropane

29

|   |          |          |         |
|---|----------|----------|---------|
| C | -2.28819 | -0.49912 | 1.29868 |
| C | -3.02618 | 0.03234  | 0.30114 |

|    |          |          |          |
|----|----------|----------|----------|
| N  | -2.25835 | 0.88223  | -0.51665 |
| H  | -2.69207 | 1.75951  | -0.78718 |
| H  | -2.63732 | -1.23000 | 2.01632  |
| C  | -0.92995 | 1.00231  | 0.04107  |
| C  | -0.89783 | 0.00737  | 1.23087  |
| H  | -0.33351 | 0.19392  | 2.14216  |
| C  | -0.07174 | -0.24257 | -0.02177 |
| C  | 1.41834  | -0.13630 | 0.04206  |
| C  | 2.12613  | -0.64240 | 1.13747  |
| C  | 2.12849  | 0.44572  | -1.01785 |
| C  | 3.51930  | -0.56104 | 1.18006  |
| H  | 1.58420  | -1.10344 | 1.95768  |
| C  | 3.51881  | 0.52733  | -0.97801 |
| H  | 1.58279  | 0.83184  | -1.87396 |
| C  | 4.21808  | 0.02495  | 0.12355  |
| H  | 4.05697  | -0.95702 | 2.03675  |
| H  | 4.05743  | 0.98392  | -1.80336 |
| H  | 5.30177  | 0.09035  | 0.15648  |
| Cl | -0.56918 | -1.57811 | -1.15547 |
| C  | -0.33205 | 2.38570  | 0.02786  |
| H  | 0.64634  | 2.39635  | 0.51119  |
| H  | -0.20621 | 2.75026  | -0.99860 |
| H  | -0.98868 | 3.08092  | 0.56293  |
| C  | -4.45186 | -0.22432 | -0.06152 |
| H  | -4.52515 | -0.73649 | -1.02865 |
| H  | -4.93787 | -0.84323 | 0.69683  |
| H  | -5.01233 | 0.71554  | -0.15065 |

2Me-5Me-endoCl\_ring\_opening\_TS

29

|   |          |          |          |
|---|----------|----------|----------|
| C | 2.26958  | -0.79635 | -1.19254 |
| C | 2.99561  | -0.05231 | -0.31690 |
| N | 2.25149  | 0.98956  | 0.22750  |
| H | 2.72083  | 1.87519  | 0.37704  |
| H | 2.70209  | -1.57770 | -1.80598 |
| C | 0.90970  | 1.04272  | -0.15013 |
| C | 0.86814  | -0.45874 | -1.25801 |
| H | 0.30049  | -0.64121 | -2.16676 |
| C | 0.11456  | -0.18446 | -0.02497 |
| C | -1.38213 | -0.10717 | -0.08698 |
| C | -2.10492 | -0.88214 | -0.99962 |
| C | -2.08122 | 0.69906  | 0.82290  |
| C | -3.50010 | -0.83501 | -1.02065 |
| H | -1.58115 | -1.53327 | -1.69168 |

|    |          |          |          |
|----|----------|----------|----------|
| C  | -3.47272 | 0.74815  | 0.80334  |
| H  | -1.52817 | 1.27996  | 1.55442  |
| C  | -4.18715 | -0.01726 | -0.12309 |
| H  | -4.04790 | -1.44057 | -1.73670 |
| H  | -4.00038 | 1.38030  | 1.51145  |
| H  | -5.27245 | 0.02047  | -0.13989 |
| Cl | 0.52753  | -1.29539 | 1.52127  |
| C  | 0.32087  | 2.41442  | -0.33659 |
| H  | -0.66170 | 2.36267  | -0.80578 |
| H  | 0.20457  | 2.92801  | 0.62723  |
| H  | 0.97528  | 3.02381  | -0.96836 |
| C  | 4.42547  | -0.20928 | 0.08567  |
| H  | 4.51394  | -0.57467 | 1.11641  |
| H  | 4.92749  | -0.92367 | -0.57198 |
| H  | 4.96449  | 0.74579  | 0.03181  |

2Me-5Me-exoCl-azabenzvalene-forming\_TS

29

|    |          |          |          |
|----|----------|----------|----------|
| C  | 1.93780  | -0.43794 | -1.38127 |
| C  | 2.64540  | -0.96331 | -0.33191 |
| N  | 2.40287  | -0.28501 | 0.84550  |
| H  | 3.19828  | -0.04836 | 1.43373  |
| H  | 1.82334  | -0.89987 | -2.35306 |
| C  | 1.43805  | 0.76256  | 0.55248  |
| C  | 1.24398  | 0.84104  | -1.00408 |
| H  | 1.14472  | 1.69942  | -1.66112 |
| C  | 0.22680  | 0.29240  | -0.14651 |
| C  | -0.96950 | -0.43080 | -0.01485 |
| C  | -1.82167 | -0.64125 | -1.12650 |
| C  | -1.30152 | -0.98134 | 1.24602  |
| C  | -2.97335 | -1.39287 | -0.97407 |
| H  | -1.55635 | -0.20587 | -2.08356 |
| C  | -2.46800 | -1.71903 | 1.39104  |
| H  | -0.63645 | -0.81466 | 2.08676  |
| C  | -3.29856 | -1.92585 | 0.28365  |
| H  | -3.63032 | -1.56391 | -1.82036 |
| H  | -2.73297 | -2.13868 | 2.35570  |
| H  | -4.20876 | -2.50660 | 0.39807  |
| Cl | -1.39533 | 2.93373  | -0.37395 |
| C  | 1.40440  | 1.93074  | 1.50647  |
| H  | 2.38429  | 2.41932  | 1.52389  |
| H  | 0.64509  | 2.64547  | 1.18683  |
| H  | 1.16680  | 1.58429  | 2.51779  |
| C  | 3.57671  | -2.12866 | -0.35126 |

|   |         |          |          |
|---|---------|----------|----------|
| H | 3.19132 | -2.93910 | 0.27765  |
| H | 3.71166 | -2.50157 | -1.36807 |
| H | 4.55664 | -1.84224 | 0.04930  |

2Me-5Me-exoCl\_C2\_cyclopropanation\_TS

29

|    |          |          |          |
|----|----------|----------|----------|
| C  | -1.81624 | -0.30244 | 1.58535  |
| C  | -2.80524 | -0.14085 | 0.60887  |
| N  | -2.40529 | 0.86552  | -0.21725 |
| H  | -2.89019 | 1.13362  | -1.06258 |
| H  | -1.84591 | -1.03319 | 2.38165  |
| C  | -1.12070 | 1.30599  | 0.10783  |
| C  | -0.79113 | 0.60608  | 1.30021  |
| H  | 0.12561  | 0.75258  | 1.85264  |
| C  | 0.17009  | 0.10231  | -1.14940 |
| C  | 1.46509  | -0.11934 | -0.45392 |
| C  | 1.88436  | -1.26464 | 0.25394  |
| C  | 2.38480  | 0.94121  | -0.59139 |
| C  | 3.15768  | -1.33707 | 0.80778  |
| H  | 1.19461  | -2.09297 | 0.37605  |
| C  | 3.65814  | 0.87473  | -0.02744 |
| H  | 2.08686  | 1.81013  | -1.16955 |
| C  | 4.04976  | -0.26585 | 0.67538  |
| H  | 3.45911  | -2.22801 | 1.35218  |
| H  | 4.34737  | 1.70574  | -0.14792 |
| H  | 5.04328  | -0.32665 | 1.11026  |
| Cl | -0.73892 | -1.46357 | -1.31405 |
| C  | -4.08527 | -0.87604 | 0.40295  |
| H  | -4.10534 | -1.36841 | -0.57626 |
| H  | -4.21000 | -1.63962 | 1.17393  |
| H  | -4.94566 | -0.19715 | 0.44823  |
| C  | -0.68043 | 2.67904  | -0.29989 |
| H  | 0.37343  | 2.81930  | -0.05098 |
| H  | -0.79906 | 2.82183  | -1.37746 |
| H  | -1.26085 | 3.44606  | 0.22785  |

2Me-5Me-exoCl\_C2\_cyclopropanation\_TS\_triplet

29

|   |          |         |          |
|---|----------|---------|----------|
| C | -1.51434 | 1.29785 | -1.57606 |
| C | -1.05573 | 2.04274 | -0.48914 |
| N | -1.45790 | 1.38521 | 0.64541  |
| H | -1.24694 | 1.68788 | 1.58533  |



|    |          |          |          |
|----|----------|----------|----------|
| H  | -1.35628 | 1.55901  | -2.61403 |
| C  | -2.06470 | 0.17597  | 0.33667  |
| C  | -2.18143 | 0.16725  | -1.07630 |
| H  | -2.64639 | -0.62615 | -1.64474 |
| C  | -0.27583 | -1.24129 | 0.38194  |
| C  | 1.04225  | -0.72943 | 0.29915  |
| C  | 1.99827  | -1.18026 | -0.65771 |
| C  | 1.44126  | 0.32128  | 1.17525  |
| C  | 3.25166  | -0.58991 | -0.74564 |
| H  | 1.72837  | -1.98600 | -1.33236 |
| C  | 2.69857  | 0.89976  | 1.07542  |
| H  | 0.75480  | 0.64964  | 1.94644  |
| C  | 3.61484  | 0.45741  | 0.11095  |
| H  | 3.95688  | -0.94799 | -1.49138 |
| H  | 2.97578  | 1.69417  | 1.76334  |
| H  | 4.59707  | 0.91388  | 0.03581  |
| Cl | -0.70835 | -2.79302 | -0.28501 |
| C  | -2.91576 | -0.53194 | 1.34860  |
| H  | -3.88642 | -0.03336 | 1.46396  |
| H  | -3.09763 | -1.56127 | 1.03034  |
| H  | -2.42760 | -0.56074 | 2.32748  |
| C  | -0.22294 | 3.27682  | -0.43162 |
| H  | -0.65770 | 4.02987  | 0.23707  |
| H  | 0.78641  | 3.05132  | -0.06162 |
| H  | -0.12981 | 3.71716  | -1.42753 |

2Me-5Me-exoCl\_C3\_cyclopropanation\_TS

29

|   |          |          |          |
|---|----------|----------|----------|
| C | -0.79029 | -2.14046 | -0.96619 |
| C | -1.67555 | -1.65548 | -0.04282 |
| N | -0.93186 | -1.27731 | 1.07766  |
| H | -1.32335 | -0.84238 | 1.90214  |
| H | -1.04609 | -2.50145 | -1.95250 |
| C | 0.39332  | -1.50444 | 0.88628  |
| C | 0.54077  | -1.97766 | -0.43731 |
| H | 1.43545  | -2.45341 | -0.80970 |
| C | 1.21589  | -0.01790 | -1.24594 |
| C | 0.37317  | 0.99108  | -0.58698 |
| C | -0.93104 | 1.08177  | -1.12640 |
| C | 0.72254  | 1.88783  | 0.44832  |
| C | -1.85282 | 2.00384  | -0.63420 |
| H | -1.19328 | 0.42865  | -1.94965 |
| C | -0.19520 | 2.81391  | 0.93022  |
| H | 1.72501  | 1.85798  | 0.86031  |

|    |          |          |          |
|----|----------|----------|----------|
| C  | -1.49005 | 2.86869  | 0.39969  |
| H  | -2.84820 | 2.05615  | -1.06597 |
| H  | 0.09450  | 3.49776  | 1.72323  |
| H  | -2.20401 | 3.59286  | 0.78139  |
| Cl | 2.95919  | 0.08839  | -0.62074 |
| C  | 1.39210  | -1.23660 | 1.95335  |
| H  | 1.04652  | -1.62941 | 2.91589  |
| H  | 2.35007  | -1.69689 | 1.71121  |
| H  | 1.55553  | -0.15654 | 2.07392  |
| C  | -3.15829 | -1.50276 | -0.06869 |
| H  | -3.45130 | -0.45519 | 0.07018  |
| H  | -3.55115 | -1.84091 | -1.03073 |
| H  | -3.64007 | -2.08975 | 0.72313  |

2Me-5Me-exoCl\_C3\_cyclopropanation\_TS\_triplet

29

|    |          |          |          |
|----|----------|----------|----------|
| C  | 1.99095  | 0.20737  | -1.33418 |
| C  | 2.52497  | -0.88562 | -0.70427 |
| N  | 2.53524  | -0.61245 | 0.66139  |
| H  | 2.86010  | -1.25509 | 1.37084  |
| H  | 1.84673  | 0.30943  | -2.40092 |
| C  | 2.03055  | 0.63620  | 0.91595  |
| C  | 1.60134  | 1.16975  | -0.32293 |
| H  | 1.50369  | 2.23412  | -0.49306 |
| C  | -0.57005 | 1.16645  | -0.21865 |
| C  | -1.42198 | 0.04740  | -0.03380 |
| C  | -0.84080 | -1.20585 | 0.31818  |
| C  | -2.83870 | 0.09471  | -0.18016 |
| C  | -1.63081 | -2.33046 | 0.50572  |
| H  | 0.23139  | -1.27134 | 0.44434  |
| C  | -3.61406 | -1.04112 | 0.01115  |
| H  | -3.31181 | 1.03362  | -0.44633 |
| C  | -3.02261 | -2.26343 | 0.35389  |
| H  | -1.16014 | -3.27245 | 0.77481  |
| H  | -4.69253 | -0.97559 | -0.10754 |
| H  | -3.63514 | -3.14772 | 0.50182  |
| Cl | -1.22821 | 2.75133  | -0.60664 |
| C  | 1.86897  | 1.17558  | 2.29391  |
| H  | 1.74752  | 2.26176  | 2.26139  |
| H  | 0.97826  | 0.75900  | 2.78530  |
| H  | 2.73434  | 0.94439  | 2.92516  |
| C  | 3.01973  | -2.18885 | -1.23655 |
| H  | 2.40467  | -3.02809 | -0.88690 |
| H  | 2.98801  | -2.18141 | -2.32901 |

|   |         |          |          |
|---|---------|----------|----------|
| H | 4.05290 | -2.38885 | -0.92644 |
|---|---------|----------|----------|

2Me-5Me-exoCl\_cyclopropane

29

|    |          |          |          |
|----|----------|----------|----------|
| C  | -1.15135 | 1.35484  | -1.37990 |
| C  | -1.08506 | 2.03376  | -0.21402 |
| N  | -1.31942 | 1.19808  | 0.89417  |
| H  | -1.92082 | 1.57373  | 1.62150  |
| H  | -0.93755 | 1.76762  | -2.35697 |
| C  | -1.68127 | -0.12459 | 0.41171  |
| C  | -1.49644 | -0.06460 | -1.11725 |
| H  | -2.12412 | -0.63392 | -1.79840 |
| C  | -0.52657 | -0.85372 | -0.24451 |
| C  | 0.89580  | -0.46267 | -0.04297 |
| C  | 1.71861  | -0.18777 | -1.14051 |
| C  | 1.42751  | -0.39204 | 1.24929  |
| C  | 3.05907  | 0.14749  | -0.95044 |
| H  | 1.30025  | -0.23610 | -2.14142 |
| C  | 2.76779  | -0.05678 | 1.44253  |
| H  | 0.78358  | -0.59628 | 2.09922  |
| C  | 3.58549  | 0.21401  | 0.34237  |
| H  | 3.69177  | 0.35791  | -1.80804 |
| H  | 3.17344  | -0.00424 | 2.44891  |
| H  | 4.62887  | 0.47716  | 0.49185  |
| Cl | -0.70677 | -2.66472 | -0.36968 |
| C  | -2.80545 | -0.80402 | 1.14688  |
| H  | -3.70287 | -0.17630 | 1.11853  |
| H  | -3.04704 | -1.76833 | 0.69825  |
| H  | -2.53596 | -0.97411 | 2.19624  |
| C  | -0.73156 | 3.46464  | 0.02562  |
| H  | 0.21468  | 3.54688  | 0.57416  |
| H  | -0.63303 | 4.00249  | -0.92054 |
| H  | -1.49959 | 3.96595  | 0.62925  |

2Me-5Me-exoCl\_ring\_opening\_TS

29

|   |          |          |          |
|---|----------|----------|----------|
| C | -1.30116 | 1.28272  | -1.42355 |
| C | -1.30419 | 1.91663  | -0.20543 |
| N | -1.53738 | 1.04940  | 0.84962  |
| H | -2.04400 | 1.40055  | 1.65429  |
| H | -1.35375 | 1.84373  | -2.35080 |
| C | -1.59114 | -0.30537 | 0.58251  |

|    |          |          |          |
|----|----------|----------|----------|
| C  | -1.32170 | -0.14030 | -1.38938 |
| H  | -1.72295 | -0.75110 | -2.19139 |
| C  | -0.50398 | -0.78136 | -0.31295 |
| C  | 0.91751  | -0.34176 | -0.06138 |
| C  | 1.75558  | -0.01980 | -1.13207 |
| C  | 1.41024  | -0.27248 | 1.24467  |
| C  | 3.07748  | 0.35956  | -0.90149 |
| H  | 1.36100  | -0.06048 | -2.14312 |
| C  | 2.73151  | 0.10995  | 1.47919  |
| H  | 0.75408  | -0.51336 | 2.07623  |
| C  | 3.56791  | 0.42600  | 0.40579  |
| H  | 3.72372  | 0.60817  | -1.73866 |
| H  | 3.10719  | 0.16387  | 2.49710  |
| H  | 4.59604  | 0.72646  | 0.58688  |
| Cl | -0.52113 | -2.61969 | -0.49429 |
| C  | -2.48800 | -1.16730 | 1.41918  |
| H  | -3.33190 | -0.58423 | 1.80070  |
| H  | -2.89099 | -1.99697 | 0.83529  |
| H  | -1.95183 | -1.60406 | 2.27360  |
| C  | -1.15978 | 3.37690  | 0.07866  |
| H  | -0.17449 | 3.61961  | 0.49759  |
| H  | -1.28039 | 3.95218  | -0.84370 |
| H  | -1.91256 | 3.72432  | 0.79928  |

4a-plus-carbene-singlet

29

|   |          |          |          |
|---|----------|----------|----------|
| C | -1.46742 | -2.02388 | 0.27383  |
| C | -2.11497 | -0.98747 | -0.36572 |
| N | -1.92875 | 0.13703  | 0.41328  |
| H | -2.29796 | 1.05088  | 0.19313  |
| H | -1.41088 | -3.04218 | -0.08820 |
| C | -1.18495 | -0.15996 | 1.54087  |
| C | -0.88283 | -1.50303 | 1.47203  |
| H | -0.29612 | -2.04811 | 2.19983  |
| C | 0.08649  | 1.26051  | -1.35410 |
| C | 1.07061  | 0.39479  | -0.75978 |
| C | 1.08582  | -0.89561 | -1.34635 |
| C | 1.98889  | 0.67368  | 0.28680  |
| C | 1.99087  | -1.86358 | -0.92079 |
| H | 0.38128  | -1.10044 | -2.14377 |
| C | 2.88552  | -0.29129 | 0.70738  |
| H | 1.98718  | 1.65453  | 0.74822  |
| C | 2.88831  | -1.55984 | 0.10188  |
| H | 1.99599  | -2.84708 | -1.37931 |

|    |          |          |          |
|----|----------|----------|----------|
| H  | 3.58963  | -0.07244 | 1.50408  |
| H  | 3.59858  | -2.31039 | 0.43667  |
| Cl | 0.06951  | 2.88523  | -0.58343 |
| C  | -0.83320 | 0.87868  | 2.55381  |
| H  | -0.24322 | 1.69366  | 2.11620  |
| H  | -1.72383 | 1.33116  | 3.00948  |
| H  | -0.23971 | 0.42799  | 3.35412  |
| C  | -2.83798 | -0.92503 | -1.66951 |
| H  | -2.32193 | -0.25420 | -2.36830 |
| H  | -2.88337 | -1.92027 | -2.12076 |
| H  | -3.86703 | -0.55894 | -1.55819 |

4a-plus-carbene-triplet

29

|    |          |          |          |
|----|----------|----------|----------|
| C  | -3.07911 | -0.43037 | -0.82139 |
| C  | -2.50619 | 0.70976  | -0.29023 |
| N  | -1.74229 | 0.30453  | 0.78582  |
| H  | -1.14217 | 0.91688  | 1.31961  |
| H  | -3.75437 | -0.45261 | -1.66725 |
| C  | -1.79122 | -1.06505 | 0.93821  |
| C  | -2.63163 | -1.54548 | -0.04701 |
| H  | -2.88503 | -2.58710 | -0.19706 |
| C  | 1.02434  | 1.55973  | -0.34183 |
| C  | 1.45365  | 0.22515  | -0.41474 |
| C  | 0.64578  | -0.72673 | -1.09872 |
| C  | 2.66576  | -0.21915 | 0.18992  |
| C  | 1.03861  | -2.05408 | -1.16735 |
| H  | -0.29243 | -0.40452 | -1.53681 |
| C  | 3.03715  | -1.55330 | 0.10728  |
| H  | 3.29024  | 0.49494  | 0.71658  |
| C  | 2.23187  | -2.48009 | -0.56871 |
| H  | 0.40254  | -2.76936 | -1.68036 |
| H  | 3.96238  | -1.87806 | 0.57497  |
| H  | 2.52972  | -3.52255 | -0.62419 |
| Cl | 1.72345  | 2.91704  | 0.38891  |
| C  | -0.97967 | -1.76923 | 1.97521  |
| H  | 0.09584  | -1.67377 | 1.77631  |
| H  | -1.16628 | -1.37824 | 2.98366  |
| H  | -1.22328 | -2.83544 | 1.97867  |
| C  | -2.60964 | 2.14651  | -0.68750 |
| H  | -1.62778 | 2.57219  | -0.93307 |
| H  | -3.24728 | 2.24365  | -1.57071 |
| H  | -3.04272 | 2.76654  | 0.10855  |

5a\_fromIRC

29

|    |          |          |          |
|----|----------|----------|----------|
| C  | 2.01791  | 1.73651  | -0.96604 |
| C  | 2.81814  | 1.03666  | -0.07881 |
| N  | 2.18819  | 0.23106  | 0.81329  |
| H  | 2.77131  | -0.27773 | 1.47336  |
| H  | 2.47724  | 2.39863  | -1.68926 |
| C  | 0.85212  | 0.02710  | 0.90315  |
| C  | 0.63568  | 1.56724  | -0.92317 |
| H  | 0.01070  | 2.10262  | -1.63022 |
| C  | 0.02625  | 0.70181  | -0.00665 |
| C  | -1.44527 | 0.51823  | -0.01212 |
| C  | -2.28956 | 1.63734  | 0.02953  |
| C  | -2.00394 | -0.76585 | -0.10253 |
| C  | -3.67396 | 1.47516  | -0.00384 |
| H  | -1.85996 | 2.63217  | 0.10581  |
| C  | -3.38911 | -0.92168 | -0.13981 |
| H  | -1.34712 | -1.62857 | -0.17696 |
| C  | -4.22632 | 0.19515  | -0.08684 |
| H  | -4.31952 | 2.34730  | 0.03816  |
| H  | -3.81478 | -1.91783 | -0.21761 |
| H  | -5.30470 | 0.06913  | -0.11328 |
| Cl | 1.00294  | -3.04125 | -0.79573 |
| C  | 0.38679  | -0.90025 | 1.97749  |
| H  | -0.61672 | -0.63139 | 2.30950  |
| H  | 0.36462  | -1.91785 | 1.56919  |
| H  | 1.06641  | -0.87813 | 2.83446  |
| C  | 4.31126  | 1.10001  | -0.02779 |
| H  | 4.74665  | 0.12154  | -0.25991 |
| H  | 4.68218  | 1.82487  | -0.75347 |
| H  | 4.65634  | 1.39455  | 0.96927  |

### 9. Coordinates for compounds on the energy pathway of product 5f/5f'

2Ph-5Me-endoCl-C23\_ring\_opening\_TS

36

|   |          |          |          |
|---|----------|----------|----------|
| C | -2.67089 | -0.82715 | 1.31262  |
| C | -3.20642 | 0.02768  | 0.40140  |
| N | -2.23457 | 0.76758  | -0.26776 |
| H | -2.43241 | 1.75093  | -0.41485 |
| H | -3.27160 | -1.39516 | 2.01269  |
| C | -0.91342 | 0.44971  | 0.06104  |

|    |          |          |          |
|----|----------|----------|----------|
| C  | -1.23155 | -0.91277 | 1.29664  |
| H  | -0.68260 | -1.17975 | 2.19620  |
| C  | -0.51526 | -0.96826 | 0.01290  |
| C  | 0.94342  | -1.31886 | 0.00590  |
| C  | 1.46294  | -2.22459 | 0.93527  |
| C  | 1.79155  | -0.78407 | -0.97351 |
| C  | 2.81508  | -2.57195 | 0.90521  |
| H  | 0.81202  | -2.66728 | 1.68233  |
| C  | 3.13931  | -1.13015 | -1.00603 |
| H  | 1.39070  | -0.09096 | -1.70554 |
| C  | 3.65694  | -2.02247 | -0.06189 |
| H  | 3.20688  | -3.27355 | 1.63576  |
| H  | 3.78752  | -0.70348 | -1.76581 |
| H  | 4.70936  | -2.28996 | -0.08464 |
| Cl | -1.33066 | -2.00451 | -1.39863 |
| C  | -4.64460 | 0.26946  | 0.07888  |
| H  | -4.90425 | -0.12941 | -0.90949 |
| H  | -5.28537 | -0.21479 | 0.82019  |
| H  | -4.87823 | 1.34207  | 0.06886  |
| C  | 0.06079  | 1.56679  | 0.09307  |
| C  | 0.05396  | 2.53047  | -0.92778 |
| C  | 0.99955  | 1.68137  | 1.12738  |
| C  | 0.97071  | 3.58197  | -0.91376 |
| H  | -0.65255 | 2.44472  | -1.74859 |
| C  | 1.91938  | 2.72781  | 1.13487  |
| H  | 1.00421  | 0.94573  | 1.92486  |
| C  | 1.90827  | 3.68287  | 0.11540  |
| H  | 0.95639  | 4.31605  | -1.71407 |
| H  | 2.64079  | 2.80169  | 1.94340  |
| H  | 2.62380  | 4.49968  | 0.12409  |

2Ph-5Me-endoCl-C23cyclopropane

36

|   |          |          |          |
|---|----------|----------|----------|
| C | -2.67957 | -0.69188 | 1.31781  |
| C | -3.24004 | 0.10107  | 0.38190  |
| N | -2.26737 | 0.74962  | -0.40589 |
| H | -2.41887 | 1.74312  | -0.55426 |
| H | -3.21864 | -1.33553 | 2.00029  |
| C | -0.95640 | 0.42467  | 0.11724  |
| C | -1.20231 | -0.61903 | 1.23949  |
| H | -0.60367 | -0.68519 | 2.14505  |
| C | -0.51002 | -1.02023 | -0.04894 |
| C | 0.94960  | -1.34372 | -0.02627 |
| C | 1.49306  | -2.11046 | 1.00911  |

|    |          |          |          |
|----|----------|----------|----------|
| C  | 1.78706  | -0.89681 | -1.05764 |
| C  | 2.85513  | -2.41761 | 1.02295  |
| H  | 0.84850  | -2.46797 | 1.80660  |
| C  | 3.14569  | -1.20283 | -1.04651 |
| H  | 1.36824  | -0.30025 | -1.86177 |
| C  | 3.68404  | -1.96258 | -0.00329 |
| H  | 3.26617  | -3.01202 | 1.83377  |
| H  | 3.78656  | -0.84561 | -1.84743 |
| H  | 4.74444  | -2.19759 | 0.00796  |
| Cl | -1.39417 | -2.06028 | -1.24750 |
| C  | -4.68204 | 0.30642  | 0.05394  |
| H  | -4.91674 | -0.08604 | -0.94287 |
| H  | -5.31956 | -0.19690 | 0.78497  |
| H  | -4.93769 | 1.37406  | 0.04972  |
| C  | 0.04864  | 1.52433  | 0.11298  |
| C  | 0.18330  | 2.32991  | -1.02735 |
| C  | 0.88346  | 1.75771  | 1.21056  |
| C  | 1.13403  | 3.34925  | -1.06601 |
| H  | -0.44858 | 2.14715  | -1.89204 |
| C  | 1.84023  | 2.77207  | 1.16918  |
| H  | 0.78808  | 1.14167  | 2.09882  |
| C  | 1.96809  | 3.57177  | 0.03197  |
| H  | 1.22798  | 3.96396  | -1.95654 |
| H  | 2.48255  | 2.94003  | 2.02885  |
| H  | 2.71215  | 4.36228  | 0.00094  |

2Ph-5Me-endoCl-C2\_cyclopropanation\_TS

36

|   |          |          |          |
|---|----------|----------|----------|
| C | -2.42890 | -0.21946 | 1.57560  |
| C | -3.04504 | 0.61458  | 0.63163  |
| N | -2.06448 | 1.27633  | -0.03227 |
| H | -2.22393 | 1.91027  | -0.80251 |
| H | -2.95202 | -0.88540 | 2.24746  |
| C | -0.79528 | 0.83892  | 0.36995  |
| C | -1.04900 | -0.06035 | 1.44222  |
| H | -0.27965 | -0.56953 | 2.00341  |
| C | -0.34478 | -0.67696 | -1.11137 |
| C | 0.67224  | -1.56492 | -0.49946 |
| C | 0.48496  | -2.84813 | 0.05497  |
| C | 1.98573  | -1.04797 | -0.54179 |
| C | 1.56081  | -3.57689 | 0.54945  |
| H | -0.51628 | -3.26324 | 0.10182  |
| C | 3.06214  | -1.77377 | -0.03499 |
| H | 2.14382  | -0.07306 | -0.98904 |



|    |          |          |          |
|----|----------|----------|----------|
| C  | 2.85410  | -3.04101 | 0.51237  |
| H  | 1.39566  | -4.56413 | 0.97247  |
| H  | 4.06351  | -1.35455 | -0.07624 |
| H  | 3.69174  | -3.61274 | 0.90166  |
| Cl | -1.91680 | -1.56030 | -1.36443 |
| C  | -4.48788 | 0.79907  | 0.30767  |
| H  | -4.76841 | 1.85864  | 0.32715  |
| H  | -4.71686 | 0.41471  | -0.69349 |
| H  | -5.10860 | 0.26393  | 1.02962  |
| C  | 0.39165  | 1.69369  | 0.17765  |
| C  | 0.59928  | 2.36948  | -1.03467 |
| C  | 1.35287  | 1.81020  | 1.19007  |
| C  | 1.73687  | 3.14921  | -1.22462 |
| H  | -0.11300 | 2.24594  | -1.84411 |
| C  | 2.50306  | 2.57589  | 0.99180  |
| H  | 1.20029  | 1.30091  | 2.13571  |
| C  | 2.69790  | 3.25087  | -0.21332 |
| H  | 1.88370  | 3.66554  | -2.16898 |
| H  | 3.24225  | 2.64847  | 1.78436  |
| H  | 3.59042  | 3.85037  | -0.36692 |

2Ph-5Me-endoCl-C3\_cyclopropanation\_TS

36

|    |          |          |          |
|----|----------|----------|----------|
| C  | -2.90108 | -0.43832 | 1.36916  |
| C  | -3.37099 | 0.43882  | 0.42942  |
| N  | -2.28383 | 1.17107  | -0.03598 |
| H  | -2.34903 | 1.89938  | -0.73237 |
| H  | -3.49453 | -1.16730 | 1.90258  |
| C  | -1.12931 | 0.79125  | 0.58914  |
| C  | -1.46938 | -0.29953 | 1.43175  |
| H  | -0.83999 | -0.66944 | 2.22570  |
| C  | -0.71333 | -1.88241 | 0.08049  |
| C  | 0.72622  | -1.60986 | -0.05081 |
| C  | 1.48071  | -1.97565 | 1.08743  |
| C  | 1.42475  | -1.11343 | -1.17115 |
| C  | 2.86608  | -1.85871 | 1.10558  |
| H  | 0.95066  | -2.36865 | 1.95069  |
| C  | 2.81096  | -1.00378 | -1.15647 |
| H  | 0.86882  | -0.81591 | -2.05239 |
| C  | 3.53679  | -1.37237 | -0.02029 |
| H  | 3.42431  | -2.14893 | 1.99099  |
| H  | 3.32997  | -0.61787 | -2.02914 |
| H  | 4.61925  | -1.28215 | -0.01302 |
| Cl | -1.58393 | -1.59095 | -1.50308 |

|   |          |         |          |
|---|----------|---------|----------|
| C | -4.74227 | 0.66956 | -0.10852 |
| H | -4.79826 | 0.42498 | -1.17644 |
| H | -5.46178 | 0.04067 | 0.42133  |
| H | -5.05176 | 1.71571 | 0.00629  |
| C | 0.15464  | 1.41040 | 0.32425  |
| C | 1.20028  | 1.30298 | 1.25937  |
| C | 0.40124  | 2.08988 | -0.88479 |
| C | 2.44996  | 1.84954 | 0.99058  |
| H | 1.02596  | 0.79166 | 2.19917  |
| C | 1.64959  | 2.64775 | -1.14339 |
| H | -0.37414 | 2.15295 | -1.64253 |
| C | 2.68112  | 2.52584 | -0.20953 |
| H | 3.24762  | 1.74593 | 1.71988  |
| H | 1.82252  | 3.16306 | -2.08362 |
| H | 3.65793  | 2.95284 | -0.41639 |

2Ph-5Me-endoCl-C45\_cyclopropane

36

|    |          |          |          |
|----|----------|----------|----------|
| C  | 0.89785  | 1.40229  | 0.48597  |
| C  | 1.65439  | 0.27835  | 0.46099  |
| N  | 0.87781  | -0.87398 | 0.70568  |
| H  | 1.27363  | -1.53263 | 1.36997  |
| H  | 1.24084  | 2.39905  | 0.24412  |
| C  | -0.48013 | -0.47304 | 0.99999  |
| C  | -0.51011 | 1.06412  | 0.78302  |
| H  | -1.12684 | 1.73879  | 1.37243  |
| C  | -1.25708 | 0.12208  | -0.15119 |
| C  | -2.75236 | 0.10971  | -0.13911 |
| C  | -3.47724 | 1.30318  | -0.05588 |
| C  | -3.44622 | -1.10376 | -0.24894 |
| C  | -4.87315 | 1.28634  | -0.07191 |
| H  | -2.94685 | 2.24770  | 0.01864  |
| C  | -4.83926 | -1.12276 | -0.26566 |
| H  | -2.88621 | -2.03142 | -0.32324 |
| C  | -5.55660 | 0.07386  | -0.17528 |
| H  | -5.42472 | 2.21966  | -0.00584 |
| H  | -5.36594 | -2.06916 | -0.34706 |
| H  | -6.64259 | 0.05960  | -0.18604 |
| Cl | -0.62810 | -0.12913 | -1.84009 |
| C  | -1.15544 | -1.22043 | 2.12069  |
| H  | -2.15209 | -0.82063 | 2.31443  |
| H  | -1.25828 | -2.28443 | 1.87734  |
| H  | -0.56352 | -1.13112 | 3.03840  |
| C  | 3.08228  | 0.13156  | 0.16105  |

|   |         |          |          |
|---|---------|----------|----------|
| C | 3.59578 | -1.09773 | -0.28419 |
| C | 3.96563 | 1.21327  | 0.32298  |
| C | 4.95504 | -1.23990 | -0.56307 |
| H | 2.91932 | -1.93367 | -0.43011 |
| C | 5.32036 | 1.07035  | 0.03778  |
| H | 3.58629 | 2.16212  | 0.68997  |
| C | 5.82216 | -0.15774 | -0.40533 |
| H | 5.33483 | -2.19672 | -0.90992 |
| H | 5.98945 | 1.91581  | 0.16999  |
| H | 6.88048 | -0.26844 | -0.62271 |

2Ph-5Me-endoCl-C45\_ring\_opening\_TS

36

|    |          |          |          |
|----|----------|----------|----------|
| C  | 0.88392  | -1.39248 | -0.63109 |
| C  | 1.62930  | -0.26048 | -0.46793 |
| N  | 0.87125  | 0.89674  | -0.66483 |
| H  | 1.31006  | 1.63942  | -1.19754 |
| H  | 1.30305  | -2.39067 | -0.62174 |
| C  | -0.48711 | 0.69540  | -0.89568 |
| C  | -0.52780 | -1.17190 | -0.79639 |
| H  | -1.13811 | -1.89352 | -1.33210 |
| C  | -1.21694 | -0.17081 | 0.03774  |
| C  | -2.71728 | -0.14471 | 0.04721  |
| C  | -3.45871 | -1.31983 | -0.11078 |
| C  | -3.39438 | 1.05999  | 0.28515  |
| C  | -4.85348 | -1.28942 | -0.05704 |
| H  | -2.95040 | -2.26556 | -0.26670 |
| C  | -4.78543 | 1.09247  | 0.33832  |
| H  | -2.82436 | 1.97093  | 0.43909  |
| C  | -5.52021 | -0.08389 | 0.16298  |
| H  | -5.41647 | -2.20938 | -0.18399 |
| H  | -5.29655 | 2.03349  | 0.51889  |
| H  | -6.60523 | -0.05985 | 0.20350  |
| Cl | -0.66299 | -0.05009 | 1.88823  |
| C  | -1.14603 | 1.62348  | -1.87787 |
| H  | -2.14336 | 1.27308  | -2.14351 |
| H  | -1.24616 | 2.63294  | -1.45769 |
| H  | -0.54724 | 1.69347  | -2.79155 |
| C  | 3.05660  | -0.13147 | -0.16572 |
| C  | 3.56826  | 1.06123  | 0.37408  |
| C  | 3.94844  | -1.18946 | -0.42011 |
| C  | 4.92999  | 1.19345  | 0.64580  |
| H  | 2.89002  | 1.87717  | 0.60335  |
| C  | 5.30509  | -1.05663 | -0.14105 |

|   |         |          |          |
|---|---------|----------|----------|
| H | 3.57671 | -2.11236 | -0.85435 |
| C | 5.80461 | 0.13647  | 0.39142  |
| H | 5.30458 | 2.12256  | 1.06593  |
| H | 5.97801 | -1.88407 | -0.34740 |
| H | 6.86442 | 0.23826  | 0.60545  |

2Ph-5Me-endoCl-C4\_cyclopropanation\_TS

36

|    |          |          |          |
|----|----------|----------|----------|
| C  | -0.94892 | -1.56651 | -0.68335 |
| C  | -1.64612 | -0.76244 | 0.18484  |
| N  | -0.76377 | -0.40978 | 1.21184  |
| H  | -1.01445 | 0.14730  | 2.01667  |
| H  | -1.32522 | -1.96640 | -1.61367 |
| C  | 0.45694  | -0.97029 | 1.02264  |
| C  | 0.41216  | -1.63969 | -0.22312 |
| H  | 1.14596  | -2.36440 | -0.53988 |
| C  | 1.44007  | -0.03268 | -1.34824 |
| C  | 2.72561  | 0.17702  | -0.65587 |
| C  | 3.64348  | -0.89054 | -0.79629 |
| C  | 3.16444  | 1.33432  | 0.02119  |
| C  | 4.92554  | -0.81615 | -0.26676 |
| H  | 3.32601  | -1.77664 | -1.33843 |
| C  | 4.45963  | 1.41899  | 0.52910  |
| H  | 2.48496  | 2.17129  | 0.13707  |
| C  | 5.34088  | 0.34388  | 0.39840  |
| H  | 5.60907  | -1.65238 | -0.38176 |
| H  | 4.77954  | 2.32435  | 1.03743  |
| H  | 6.34690  | 0.41030  | 0.80224  |
| Cl | 0.35239  | 1.41729  | -1.16533 |
| C  | -3.01876 | -0.26591 | 0.14108  |
| C  | -3.39126 | 0.91986  | 0.79781  |
| C  | -3.99907 | -0.97154 | -0.57948 |
| C  | -4.70579 | 1.38033  | 0.74116  |
| H  | -2.64689 | 1.50443  | 1.33059  |
| C  | -5.30839 | -0.50336 | -0.64233 |
| H  | -3.73033 | -1.89842 | -1.07689 |
| C  | -5.67006 | 0.67284  | 0.02104  |
| H  | -4.97314 | 2.30016  | 1.25313  |
| H  | -6.05174 | -1.06330 | -1.20245 |
| H  | -6.69318 | 1.03387  | -0.02423 |
| C  | 1.55024  | -0.83155 | 2.01976  |
| H  | 1.92128  | 0.20173  | 2.05860  |
| H  | 1.20172  | -1.10297 | 3.02261  |
| H  | 2.39160  | -1.47378 | 1.75718  |

## 2Ph-5Me-endoCl-C5\_cyclopropanation\_TS

36

|    |          |          |          |
|----|----------|----------|----------|
| C  | 0.56799  | -0.05043 | -1.55366 |
| C  | 1.50896  | 0.48708  | -0.66596 |
| N  | 0.91144  | 1.56271  | -0.05686 |
| H  | 1.35381  | 2.15411  | 0.63149  |
| H  | 0.71516  | -0.93259 | -2.16029 |
| C  | -0.40196 | 1.69949  | -0.45765 |
| C  | -0.60743 | 0.70454  | -1.43563 |
| H  | -1.53631 | 0.55231  | -1.96573 |
| C  | -1.52267 | 0.40760  | 1.18009  |
| C  | -2.68715 | -0.23244 | 0.53982  |
| C  | -2.80076 | -1.55075 | 0.04762  |
| C  | -3.82064 | 0.60541  | 0.46201  |
| C  | -3.99230 | -2.00243 | -0.50483 |
| H  | -1.93954 | -2.20865 | 0.09152  |
| C  | -5.01569 | 0.15375  | -0.09395 |
| H  | -3.74349 | 1.61108  | 0.86288  |
| C  | -5.10347 | -1.15180 | -0.58056 |
| H  | -4.06246 | -3.01803 | -0.88412 |
| H  | -5.87673 | 0.81381  | -0.14194 |
| H  | -6.03270 | -1.51060 | -1.01367 |
| Cl | -0.26645 | -0.81553 | 1.59391  |
| C  | -1.15445 | 2.96843  | -0.22130 |
| H  | -2.21161 | 2.81949  | -0.45127 |
| H  | -1.07486 | 3.28755  | 0.82129  |
| H  | -0.77673 | 3.77253  | -0.86606 |
| C  | 2.86301  | 0.04874  | -0.34987 |
| C  | 3.48048  | 0.38826  | 0.86774  |
| C  | 3.58067  | -0.73686 | -1.27069 |
| C  | 4.77680  | -0.03727 | 1.14929  |
| H  | 2.93619  | 0.96054  | 1.61305  |
| C  | 4.87260  | -1.16688 | -0.98219 |
| H  | 3.12476  | -0.99448 | -2.22163 |
| C  | 5.47927  | -0.81669 | 0.22746  |
| H  | 5.23478  | 0.23208  | 2.09657  |
| H  | 5.41115  | -1.77056 | -1.70696 |
| H  | 6.48850  | -1.15002 | 0.44987  |

## 2Ph-5Me-exoCl-C23\_cyclopropane

36

|    |          |          |          |
|----|----------|----------|----------|
| C  | 0.80924  | 2.02290  | -1.26990 |
| C  | 0.73576  | 2.38015  | 0.03009  |
| N  | -0.05355 | 1.48520  | 0.77937  |
| H  | -0.71856 | 1.90705  | 1.42126  |
| H  | 1.41100  | 2.51635  | -2.02140 |
| C  | -0.63423 | 0.51232  | -0.13635 |
| C  | -0.00802 | 0.80746  | -1.51060 |
| H  | -0.54517 | 0.66037  | -2.44395 |
| C  | 0.38454  | -0.44211 | -0.73318 |
| C  | 1.73516  | -0.65398 | -0.14588 |
| C  | 2.88272  | -0.48074 | -0.92732 |
| C  | 1.86626  | -1.05148 | 1.18911  |
| C  | 4.14665  | -0.70789 | -0.38343 |
| H  | 2.77748  | -0.16471 | -1.96087 |
| C  | 3.12922  | -1.27905 | 1.73588  |
| H  | 0.97508  | -1.17821 | 1.79605  |
| C  | 4.27151  | -1.10688 | 0.95007  |
| H  | 5.03264  | -0.57286 | -0.99722 |
| H  | 3.22264  | -1.58750 | 2.77323  |
| H  | 5.25566  | -1.28169 | 1.37550  |
| Cl | -0.32212 | -1.98037 | -1.39701 |
| C  | 1.41773  | 3.50243  | 0.74051  |
| H  | 2.14458  | 3.11983  | 1.46722  |
| H  | 1.94148  | 4.14748  | 0.03079  |
| H  | 0.69583  | 4.11458  | 1.29662  |
| C  | -2.04713 | 0.12684  | 0.13684  |
| C  | -3.07907 | 0.47920  | -0.73789 |
| C  | -2.35487 | -0.56770 | 1.31468  |
| C  | -4.40010 | 0.13461  | -0.44682 |
| H  | -2.84445 | 1.02221  | -1.64826 |
| C  | -3.67463 | -0.90614 | 1.61040  |
| H  | -1.55527 | -0.84624 | 1.99564  |
| C  | -4.70044 | -0.55742 | 0.72789  |
| H  | -5.19364 | 0.40982  | -1.13555 |
| H  | -3.90200 | -1.44658 | 2.52474  |
| H  | -5.72832 | -0.82495 | 0.95515  |

2Ph-5Me-exoCl-C23\_ring\_opening\_TS

36

|   |          |         |          |
|---|----------|---------|----------|
| C | 0.99434  | 2.01453 | -1.42844 |
| C | 0.83490  | 2.38214 | -0.11494 |
| N | -0.08830 | 1.60085 | 0.55934  |
| H | -0.67467 | 2.05753 | 1.24900  |
| H | 1.50717  | 2.65781 | -2.13520 |

|    |          |          |          |
|----|----------|----------|----------|
| C  | -0.62213 | 0.51217  | -0.11632 |
| C  | 0.37073  | 0.79700  | -1.82113 |
| H  | 0.04922  | 0.59045  | -2.83678 |
| C  | 0.40503  | -0.31064 | -0.82013 |
| C  | 1.67992  | -0.65093 | -0.08697 |
| C  | 2.91440  | -0.56980 | -0.73525 |
| C  | 1.62487  | -1.07389 | 1.24415  |
| C  | 4.08578  | -0.91451 | -0.06082 |
| H  | 2.95128  | -0.22683 | -1.76488 |
| C  | 2.79470  | -1.41701 | 1.92172  |
| H  | 0.66305  | -1.13287 | 1.74600  |
| C  | 4.02811  | -1.33743 | 1.26980  |
| H  | 5.04290  | -0.84909 | -0.57052 |
| H  | 2.74515  | -1.74360 | 2.95658  |
| H  | 4.94044  | -1.60119 | 1.79718  |
| Cl | -0.28921 | -1.86240 | -1.51900 |
| C  | 1.46861  | 3.52877  | 0.60434  |
| H  | 2.25060  | 3.19268  | 1.29715  |
| H  | 1.92890  | 4.21398  | -0.11278 |
| H  | 0.73254  | 4.09168  | 1.19359  |
| C  | -2.02238 | 0.14139  | 0.16748  |
| C  | -2.95469 | -0.08545 | -0.85635 |
| C  | -2.44913 | 0.03429  | 1.50282  |
| C  | -4.27088 | -0.42948 | -0.55341 |
| H  | -2.64092 | 0.02051  | -1.88904 |
| C  | -3.77094 | -0.29457 | 1.80309  |
| H  | -1.73844 | 0.19169  | 2.30978  |
| C  | -4.68623 | -0.53275 | 0.77642  |
| H  | -4.97783 | -0.60255 | -1.35983 |
| H  | -4.08036 | -0.37534 | 2.84120  |
| H  | -5.71444 | -0.79298 | 1.00981  |

2Ph-5Me-exoCl-C2\_cyclopropanation\_TS

36

|   |          |          |          |
|---|----------|----------|----------|
| C | 1.05313  | 1.25370  | -1.67836 |
| C | 1.01899  | 2.08971  | -0.55542 |
| N | -0.07676 | 1.74593  | 0.17412  |
| H | -0.35613 | 2.19241  | 1.03639  |
| H | 1.82429  | 1.26494  | -2.43550 |
| C | -0.72890 | 0.63785  | -0.37715 |
| C | -0.03683 | 0.38437  | -1.59374 |
| H | -0.28919 | -0.40895 | -2.28151 |
| C | 0.17912  | -1.04379 | 0.66016  |
| C | 1.62846  | -0.92849 | 0.48100  |

|    |          |          |          |
|----|----------|----------|----------|
| C  | 2.47494  | -1.68462 | -0.36194 |
| C  | 2.22499  | 0.05969  | 1.29505  |
| C  | 3.84456  | -1.46376 | -0.38028 |
| H  | 2.03973  | -2.44326 | -1.00292 |
| C  | 3.60153  | 0.28878  | 1.26892  |
| H  | 1.59090  | 0.61780  | 1.97467  |
| C  | 4.41459  | -0.47091 | 0.43058  |
| H  | 4.47870  | -2.05765 | -1.03275 |
| H  | 4.03472  | 1.05315  | 1.90737  |
| H  | 5.48710  | -0.30054 | 0.40799  |
| Cl | -0.48546 | -2.51575 | -0.24737 |
| C  | 1.92349  | 3.20925  | -0.16484 |
| H  | 1.47564  | 4.18063  | -0.41011 |
| H  | 2.13448  | 3.20061  | 0.90870  |
| H  | 2.87151  | 3.12823  | -0.70144 |
| C  | -2.14887 | 0.38537  | -0.05786 |
| C  | -2.60081 | 0.42464  | 1.26948  |
| C  | -3.06723 | 0.11315  | -1.07982 |
| C  | -3.94553 | 0.21455  | 1.56455  |
| H  | -1.88513 | 0.58122  | 2.07023  |
| C  | -4.41121 | -0.11657 | -0.78152 |
| H  | -2.72892 | 0.09111  | -2.11085 |
| C  | -4.85636 | -0.05991 | 0.53987  |
| H  | -4.28187 | 0.24984  | 2.59688  |
| H  | -5.11059 | -0.33030 | -1.58473 |
| H  | -5.90354 | -0.23117 | 0.77188  |

2Ph-5Me-exoCl-C3\_cyclopropanation\_TS

36

|   |          |          |          |
|---|----------|----------|----------|
| C | -1.53124 | 2.39243  | 0.60274  |
| C | -1.87318 | 1.97077  | -0.65240 |
| N | -0.77905 | 1.28246  | -1.17213 |
| H | -0.75670 | 0.87093  | -2.09402 |
| H | -2.17597 | 2.93142  | 1.28231  |
| C | 0.25848  | 1.26603  | -0.28645 |
| C | -0.21992 | 1.87511  | 0.90920  |
| H | 0.42253  | 2.23771  | 1.69748  |
| C | -0.57517 | 0.03034  | 1.94581  |
| C | -1.11749 | -0.91929 | 0.95848  |
| C | -2.48634 | -0.72371 | 0.66452  |
| C | -0.45464 | -1.99592 | 0.32895  |
| C | -3.15590 | -1.54901 | -0.23680 |
| H | -3.01275 | 0.07579  | 1.17231  |
| C | -1.12795 | -2.82602 | -0.56069 |



|    |          |          |          |
|----|----------|----------|----------|
| H  | 0.59382  | -2.16878 | 0.54083  |
| C  | -2.47765 | -2.60077 | -0.85616 |
| H  | -4.20852 | -1.37977 | -0.44551 |
| H  | -0.59976 | -3.64940 | -1.03382 |
| H  | -2.99779 | -3.24980 | -1.55489 |
| Cl | 1.11534  | -0.47393 | 2.47823  |
| C  | -3.12461 | 2.13105  | -1.44592 |
| H  | -3.56416 | 1.15610  | -1.68793 |
| H  | -3.85845 | 2.70429  | -0.87449 |
| H  | -2.93892 | 2.65575  | -2.39109 |
| C  | 1.54373  | 0.67095  | -0.59706 |
| C  | 2.69843  | 1.07235  | 0.09982  |
| C  | 1.66361  | -0.32735 | -1.58387 |
| C  | 3.93394  | 0.49983  | -0.18710 |
| H  | 2.62302  | 1.84632  | 0.85551  |
| C  | 2.90179  | -0.89668 | -1.86752 |
| H  | 0.78333  | -0.68617 | -2.10695 |
| C  | 4.04169  | -0.48517 | -1.17216 |
| H  | 4.81554  | 0.82540  | 0.35696  |
| H  | 2.97524  | -1.66952 | -2.62683 |
| H  | 5.00665  | -0.93048 | -1.39517 |

2Ph-5Me-exoCl-C45\_cyclopropane

36

|   |          |          |          |
|---|----------|----------|----------|
| C | -0.19610 | -1.16572 | -1.39845 |
| C | -0.91983 | -1.00524 | -0.26305 |
| N | -0.13939 | -1.22666 | 0.89150  |
| H | -0.57081 | -1.80968 | 1.60315  |
| H | -0.54529 | -0.95900 | -2.40083 |
| C | 1.18732  | -1.65346 | 0.47946  |
| C | 1.19331  | -1.55053 | -1.05971 |
| H | 1.76905  | -2.22377 | -1.68955 |
| C | 1.97487  | -0.55704 | -0.20315 |
| C | 1.61056  | 0.88279  | -0.09266 |
| C | 1.41302  | 1.65529  | -1.24208 |
| C | 1.47941  | 1.47748  | 1.16697  |
| C | 1.09199  | 3.00822  | -1.13524 |
| H | 1.50819  | 1.18829  | -2.21787 |
| C | 1.15765  | 2.83041  | 1.27665  |
| H | 1.62354  | 0.87264  | 2.05681  |
| C | 0.96244  | 3.59743  | 0.12528  |
| H | 0.94045  | 3.60149  | -2.03247 |
| H | 1.05609  | 3.28506  | 2.25796  |
| H | 0.70884  | 4.65037  | 0.20980  |

|    |          |          |          |
|----|----------|----------|----------|
| Cl | 3.78104  | -0.79187 | -0.24390 |
| C  | 1.80069  | -2.75547 | 1.30055  |
| H  | 1.94637  | -2.43033 | 2.33751  |
| H  | 1.14219  | -3.63087 | 1.30160  |
| H  | 2.76932  | -3.05527 | 0.89909  |
| C  | -2.31396 | -0.57758 | -0.11130 |
| C  | -2.74986 | 0.01620  | 1.08478  |
| C  | -3.23956 | -0.75581 | -1.15418 |
| C  | -4.07563 | 0.42357  | 1.23212  |
| H  | -2.03690 | 0.17682  | 1.88687  |
| C  | -4.56033 | -0.34233 | -1.00664 |
| H  | -2.92050 | -1.23510 | -2.07473 |
| C  | -4.98525 | 0.24781  | 0.18816  |
| H  | -4.39568 | 0.88486  | 2.16208  |
| H  | -5.26364 | -0.48873 | -1.82143 |
| H  | -6.01751 | 0.56542  | 0.30282  |

2Ph-5Me-exoCl-C45\_ring\_opening\_TS

36

|    |          |          |          |
|----|----------|----------|----------|
| C  | -0.25721 | -1.14736 | -1.47847 |
| C  | -0.95875 | -0.93587 | -0.31061 |
| N  | -0.21995 | -1.27289 | 0.82336  |
| H  | -0.71970 | -1.72900 | 1.57875  |
| H  | -0.73723 | -1.12837 | -2.44991 |
| C  | 1.10679  | -1.60505 | 0.64226  |
| C  | 1.12590  | -1.43264 | -1.33093 |
| H  | 1.70357  | -1.98137 | -2.06713 |
| C  | 1.83750  | -0.67270 | -0.25277 |
| C  | 1.63257  | 0.81399  | -0.10192 |
| C  | 1.53401  | 1.63048  | -1.23136 |
| C  | 1.55532  | 1.38467  | 1.17156  |
| C  | 1.36580  | 3.00744  | -1.09055 |
| H  | 1.57934  | 1.17848  | -2.21779 |
| C  | 1.38301  | 2.76173  | 1.31551  |
| H  | 1.62313  | 0.74707  | 2.04830  |
| C  | 1.28816  | 3.57558  | 0.18413  |
| H  | 1.28929  | 3.63657  | -1.97282 |
| H  | 1.31964  | 3.19839  | 2.30812  |
| H  | 1.15062  | 4.64743  | 0.29471  |
| Cl | 3.64611  | -1.02090 | -0.29418 |
| C  | 1.72218  | -2.62688 | 1.54833  |
| H  | 0.97608  | -3.36379 | 1.86012  |
| H  | 2.53245  | -3.15700 | 1.04571  |
| H  | 2.14757  | -2.15915 | 2.44722  |

|   |          |          |          |
|---|----------|----------|----------|
| C | -2.34051 | -0.48987 | -0.13901 |
| C | -2.76979 | 0.05554  | 1.08502  |
| C | -3.27909 | -0.60226 | -1.18289 |
| C | -4.09296 | 0.45943  | 1.26335  |
| H | -2.05322 | 0.19093  | 1.88940  |
| C | -4.59547 | -0.18950 | -1.00408 |
| H | -2.97662 | -1.03050 | -2.13351 |
| C | -5.01319 | 0.34070  | 0.22145  |
| H | -4.39977 | 0.88001  | 2.21697  |
| H | -5.30284 | -0.28897 | -1.82272 |
| H | -6.04204 | 0.66033  | 0.35796  |

2Ph-5Me-exoCl-C4\_cyclopropanation\_TS

36

|    |          |          |          |
|----|----------|----------|----------|
| C  | -0.19157 | -1.94754 | -0.71530 |
| C  | -0.91025 | -1.18107 | 0.16582  |
| N  | -0.05138 | -0.86867 | 1.22881  |
| H  | -0.31837 | -0.33345 | 2.04338  |
| H  | -0.54607 | -2.31228 | -1.66832 |
| C  | 1.17151  | -1.41833 | 1.04786  |
| C  | 1.16904  | -2.02498 | -0.23768 |
| H  | 1.89441  | -2.76500 | -0.54239 |
| C  | 2.19737  | -0.46005 | -1.21862 |
| C  | 1.66465  | 0.81146  | -0.69573 |
| C  | 0.40051  | 1.16737  | -1.21971 |
| C  | 2.28173  | 1.71312  | 0.20011  |
| C  | -0.23361 | 2.34772  | -0.83857 |
| H  | -0.06390 | 0.50763  | -1.94224 |
| C  | 1.65358  | 2.89829  | 0.56764  |
| H  | 3.26381  | 1.47980  | 0.59589  |
| C  | 0.38765  | 3.21538  | 0.06143  |
| H  | -1.20973 | 2.59078  | -1.24732 |
| H  | 2.14838  | 3.57893  | 1.25505  |
| H  | -0.10175 | 4.13909  | 0.35658  |
| Cl | 3.95050  | -0.71184 | -0.65148 |
| C  | 2.23944  | -1.29614 | 2.07216  |
| H  | 1.82807  | -1.43226 | 3.07773  |
| H  | 3.02170  | -2.03723 | 1.90836  |
| H  | 2.70235  | -0.30024 | 2.03144  |
| C  | -2.28470 | -0.68827 | 0.11536  |
| C  | -2.66932 | 0.47539  | 0.80328  |
| C  | -3.24721 | -1.36871 | -0.65041 |
| C  | -3.98144 | 0.94000  | 0.73091  |
| H  | -1.93534 | 1.04371  | 1.36584  |

|   |          |          |          |
|---|----------|----------|----------|
| C | -4.55462 | -0.89654 | -0.72743 |
| H | -2.96724 | -2.27801 | -1.17337 |
| C | -4.92935 | 0.25800  | -0.03429 |
| H | -4.25944 | 1.84342  | 1.26580  |
| H | -5.28556 | -1.43607 | -1.32265 |
| H | -5.95064 | 0.62248  | -0.09144 |

2Ph-5Me-exoCl-C5\_cyclopropanation\_TS

36

|    |          |          |          |
|----|----------|----------|----------|
| C  | -0.37133 | -0.89648 | 1.67539  |
| C  | 0.45028  | -1.15718 | 0.56787  |
| N  | -0.34163 | -1.74636 | -0.38534 |
| H  | -0.04479 | -1.92973 | -1.33298 |
| H  | -0.04346 | -0.45955 | 2.60732  |
| C  | -1.67617 | -1.75027 | 0.00314  |
| C  | -1.67050 | -1.28687 | 1.34150  |
| H  | -2.54854 | -1.22465 | 1.96715  |
| C  | -2.41874 | 0.18427  | -0.82152 |
| C  | -1.31541 | 1.11326  | -0.58226 |
| C  | -1.13206 | 2.01323  | 0.49073  |
| C  | -0.30272 | 1.04629  | -1.56553 |
| C  | 0.00021  | 2.81499  | 0.56327  |
| H  | -1.88668 | 2.06635  | 1.26767  |
| C  | 0.82943  | 1.85155  | -1.49811 |
| H  | -0.43961 | 0.35667  | -2.39300 |
| C  | 0.98696  | 2.73305  | -0.42744 |
| H  | 0.12759  | 3.49764  | 1.39859  |
| H  | 1.59456  | 1.78011  | -2.26501 |
| H  | 1.87542  | 3.35391  | -0.36029 |
| Cl | -3.90598 | 0.66374  | 0.18374  |
| C  | -2.66154 | -2.65326 | -0.67006 |
| H  | -2.49602 | -3.69874 | -0.38070 |
| H  | -3.67635 | -2.36916 | -0.38327 |
| H  | -2.58157 | -2.57061 | -1.75707 |
| C  | 1.86258  | -0.86628 | 0.36657  |
| C  | 2.61616  | -1.51482 | -0.62845 |
| C  | 2.49414  | 0.10396  | 1.16566  |
| C  | 3.95790  | -1.19695 | -0.82027 |
| H  | 2.16015  | -2.28476 | -1.24413 |
| C  | 3.83825  | 0.41285  | 0.97574  |
| H  | 1.91774  | 0.63577  | 1.91441  |
| C  | 4.57589  | -0.23236 | -0.01957 |
| H  | 4.52478  | -1.70906 | -1.59218 |
| H  | 4.30739  | 1.16899  | 1.59844  |

|   |         |         |          |
|---|---------|---------|----------|
| H | 5.62260 | 0.01369 | -0.17108 |
|---|---------|---------|----------|

2Ph-6Me-3Ph-pyridine

36

|    |          |          |          |
|----|----------|----------|----------|
| C  | 0.95792  | -3.16287 | 0.08739  |
| C  | 2.01175  | -2.25757 | 0.10897  |
| N  | 1.71017  | -0.93928 | 0.07268  |
| H  | 2.52264  | -0.26656 | -0.00647 |
| H  | 1.16905  | -4.22506 | 0.10799  |
| C  | 0.45164  | -0.43103 | 0.03381  |
| C  | -0.34924 | -2.69291 | 0.05768  |
| H  | -1.17363 | -3.39817 | 0.07088  |
| C  | -0.63490 | -1.32013 | 0.04676  |
| C  | -2.04584 | -0.86060 | 0.08002  |
| C  | -2.97402 | -1.39628 | -0.82366 |
| C  | -2.47902 | 0.07411  | 1.03254  |
| C  | -4.30933 | -0.99437 | -0.78524 |
| H  | -2.64429 | -2.11318 | -1.57001 |
| C  | -3.81383 | 0.46916  | 1.07273  |
| H  | -1.76977 | 0.48600  | 1.74270  |
| C  | -4.73190 | -0.06062 | 0.16203  |
| H  | -5.01636 | -1.40873 | -1.49756 |
| H  | -4.13836 | 1.18942  | 1.81769  |
| H  | -5.77120 | 0.25263  | 0.19232  |
| Cl | 4.20965  | 0.80948  | -0.32820 |
| C  | 3.45311  | -2.65288 | 0.18063  |
| H  | 3.82434  | -2.53461 | 1.20558  |
| H  | 3.56920  | -3.69922 | -0.10756 |
| H  | 4.06655  | -2.01617 | -0.46138 |
| C  | 0.33109  | 1.04043  | -0.03175 |
| C  | 1.03825  | 1.84630  | 0.87108  |
| C  | -0.49005 | 1.63739  | -1.00049 |
| C  | 0.91383  | 3.23337  | 0.81354  |
| H  | 1.67234  | 1.38793  | 1.62194  |
| C  | -0.59978 | 3.02338  | -1.06216 |
| H  | -1.03377 | 1.01558  | -1.70312 |
| C  | 0.09680  | 3.82337  | -0.15197 |
| H  | 1.45622  | 3.85090  | 1.52258  |
| H  | -1.22956 | 3.47942  | -1.81964 |
| H  | 0.00261  | 4.90419  | -0.19673 |

2Ph-6Me-5Ph-pyridine

36

|    |          |          |          |
|----|----------|----------|----------|
| C  | 0.38192  | -1.85312 | 0.11069  |
| C  | 1.18805  | -0.71757 | 0.07280  |
| N  | 0.56870  | 0.48866  | 0.00115  |
| H  | 1.16175  | 1.34727  | -0.15314 |
| H  | 0.84004  | -2.83060 | 0.18857  |
| C  | -0.77442 | 0.67286  | -0.00642 |
| C  | -0.99827 | -1.71488 | 0.09623  |
| H  | -1.62440 | -2.59943 | 0.14658  |
| C  | -1.60932 | -0.45244 | 0.05841  |
| C  | -3.08856 | -0.34819 | 0.06043  |
| C  | -3.83845 | -1.13469 | -0.82785 |
| C  | -3.76220 | 0.49084  | 0.96083  |
| C  | -5.23101 | -1.07414 | -0.82356 |
| H  | -3.32615 | -1.77978 | -1.53563 |
| C  | -5.15503 | 0.54696  | 0.96617  |
| H  | -3.19735 | 1.08274  | 1.67342  |
| C  | -5.89280 | -0.23252 | 0.07285  |
| H  | -5.79784 | -1.68123 | -1.52292 |
| H  | -5.66313 | 1.19598  | 1.67295  |
| H  | -6.97763 | -0.18536 | 0.07630  |
| Cl | 2.12870  | 3.07098  | -0.71137 |
| C  | -1.25636 | 2.08770  | -0.11669 |
| H  | -2.21882 | 2.12273  | -0.62909 |
| H  | -1.39097 | 2.52540  | 0.87922  |
| H  | -0.52320 | 2.69933  | -0.64690 |
| C  | 2.65682  | -0.76950 | 0.12686  |
| C  | 3.38976  | 0.20269  | 0.82612  |
| C  | 3.33657  | -1.82776 | -0.49944 |
| C  | 4.77798  | 0.11514  | 0.89424  |
| H  | 2.87661  | 1.01694  | 1.32373  |
| C  | 4.72465  | -1.90700 | -0.43175 |
| H  | 2.78025  | -2.57121 | -1.06103 |
| C  | 5.44808  | -0.93682 | 0.26643  |
| H  | 5.33557  | 0.86775  | 1.44278  |
| H  | 5.24139  | -2.72214 | -0.92847 |
| H  | 6.53058  | -1.00105 | 0.32093  |

4f\_plus\_carbene\_singlet\_GS

36

|   |         |          |          |
|---|---------|----------|----------|
| C | 3.15492 | -0.67327 | -0.49996 |
| C | 1.79432 | -1.11576 | -0.63294 |
| C | 1.25071 | -0.83814 | -1.91430 |
| C | 0.96093 | -1.75578 | 0.32352  |

|    |          |          |          |
|----|----------|----------|----------|
| C  | -0.05328 | -1.19182 | -2.23411 |
| H  | 1.88813  | -0.33748 | -2.63505 |
| C  | -0.33825 | -2.10479 | 0.00265  |
| H  | 1.35423  | -1.96542 | 1.31164  |
| C  | -0.85132 | -1.81231 | -1.27122 |
| H  | -0.45914 | -0.96414 | -3.21433 |
| H  | -0.97329 | -2.58556 | 0.73980  |
| H  | -1.88201 | -2.06115 | -1.50192 |
| Cl | 3.84008  | -1.09970 | 1.11183  |
| C  | -1.80022 | 0.93283  | 0.03929  |
| C  | -2.72072 | 0.99760  | -1.00422 |
| C  | -3.88772 | 0.29787  | -0.60473 |
| C  | -3.67161 | -0.19121 | 0.67476  |
| N  | -2.41358 | 0.21074  | 1.04922  |
| H  | -1.97355 | -0.05731 | 1.91667  |
| H  | -2.56598 | 1.50018  | -1.94871 |
| H  | -4.79387 | 0.16188  | -1.17990 |
| C  | -4.54072 | -1.00696 | 1.57402  |
| H  | -4.07208 | -1.96492 | 1.83369  |
| H  | -4.75974 | -0.48574 | 2.51464  |
| H  | -5.49129 | -1.22149 | 1.07888  |
| C  | -0.43965 | 1.43464  | 0.13902  |
| C  | 0.17823  | 2.03110  | -0.98003 |
| C  | 0.31670  | 1.31812  | 1.32243  |
| C  | 1.49695  | 2.46379  | -0.92461 |
| H  | -0.37902 | 2.13232  | -1.90525 |
| C  | 1.63911  | 1.74604  | 1.37204  |
| H  | -0.12235 | 0.88442  | 2.21563  |
| C  | 2.24583  | 2.30545  | 0.24523  |
| H  | 1.95231  | 2.90551  | -1.80648 |
| H  | 2.20500  | 1.62519  | 2.29075  |
| H  | 3.28106  | 2.62916  | 0.28334  |

4f\_plus\_carbene\_triplet\_GS

36

|   |          |          |          |
|---|----------|----------|----------|
| C | -0.75180 | -2.18040 | -1.14005 |
| C | -1.05057 | -1.72321 | 0.15174  |
| C | -2.40682 | -1.46838 | 0.50295  |
| C | -0.04158 | -1.48645 | 1.12832  |
| C | -2.72672 | -0.98821 | 1.76338  |
| H | -3.18343 | -1.64489 | -0.23382 |
| C | -0.38345 | -0.99608 | 2.38041  |
| H | 0.99696  | -1.66128 | 0.87290  |
| C | -1.72103 | -0.73862 | 2.70946  |

|    |          |          |          |
|----|----------|----------|----------|
| H  | -3.76614 | -0.79971 | 2.01582  |
| H  | 0.40194  | -0.80091 | 3.10430  |
| H  | -1.97823 | -0.35566 | 3.69197  |
| Cl | 0.72207  | -2.54865 | -1.87802 |
| C  | 0.16335  | 1.37293  | -0.75429 |
| C  | -0.21989 | 1.45477  | -2.08677 |
| C  | -1.61573 | 1.72172  | -2.12227 |
| C  | -2.06756 | 1.79399  | -0.81481 |
| N  | -0.97510 | 1.60459  | -0.00080 |
| H  | -1.04313 | 1.41586  | 0.99017  |
| H  | 0.44390  | 1.36831  | -2.93641 |
| H  | -2.22878 | 1.86292  | -3.00282 |
| C  | -3.43082 | 2.04973  | -0.26232 |
| H  | -3.75719 | 1.24104  | 0.40195  |
| H  | -3.46975 | 2.98249  | 0.31522  |
| H  | -4.15410 | 2.13000  | -1.07837 |
| C  | 1.46357  | 1.11622  | -0.14781 |
| C  | 2.47798  | 0.47751  | -0.88532 |
| C  | 1.73873  | 1.47250  | 1.18549  |
| C  | 3.71267  | 0.19514  | -0.30724 |
| H  | 2.28011  | 0.17704  | -1.90900 |
| C  | 2.97095  | 1.17855  | 1.76550  |
| H  | 0.98614  | 1.99035  | 1.77253  |
| C  | 3.96594  | 0.53653  | 1.02471  |
| H  | 4.47673  | -0.30590 | -0.89534 |
| H  | 3.15604  | 1.45897  | 2.79880  |
| H  | 4.92598  | 0.30698  | 1.47750  |

## 10. Coordinates for compounds on the energy pathway of product 5t/5t'

2Ph-3Ph-6tBu-pyridine

45

|   |          |          |          |
|---|----------|----------|----------|
| C | 1.86671  | -2.00096 | -0.41987 |
| C | 2.36808  | -0.70707 | -0.44112 |
| N | 1.45179  | 0.29005  | -0.44853 |
| H | 1.79542  | 1.24407  | -0.50460 |
| H | 2.54334  | -2.84348 | -0.43152 |
| C | 0.10406  | 0.15082  | -0.39025 |
| C | 0.49083  | -2.21003 | -0.36261 |
| H | 0.10921  | -3.22444 | -0.31186 |
| C | -0.41816 | -1.14746 | -0.32119 |
| C | -1.86785 | -1.39962 | -0.14547 |
| C | -2.54438 | -2.28299 | -0.99656 |
| C | -2.56114 | -0.78031 | 0.90544  |



|    |          |          |          |
|----|----------|----------|----------|
| C  | -3.90493 | -2.53065 | -0.81128 |
| H  | -2.01009 | -2.75876 | -1.81402 |
| C  | -3.91791 | -1.03584 | 1.08994  |
| H  | -2.01973 | -0.12392 | 1.58022  |
| C  | -4.59385 | -1.90615 | 0.22997  |
| H  | -4.42515 | -3.20807 | -1.48178 |
| H  | -4.44824 | -0.55909 | 1.90903  |
| H  | -5.65286 | -2.09926 | 0.37370  |
| Cl | 0.61500  | 0.26950  | 2.98771  |
| C  | 3.83993  | -0.31874 | -0.41647 |
| C  | -0.67860 | 1.39822  | -0.46763 |
| C  | -0.32195 | 2.50116  | 0.32278  |
| C  | -1.74818 | 1.50204  | -1.37034 |
| C  | -1.03133 | 3.69565  | 0.20825  |
| H  | 0.46012  | 2.39070  | 1.06728  |
| C  | -2.44760 | 2.70007  | -1.48257 |
| H  | -2.02064 | 0.65159  | -1.98527 |
| C  | -2.09143 | 3.79804  | -0.69419 |
| H  | -0.76240 | 4.54164  | 0.83308  |
| H  | -3.26942 | 2.77799  | -2.18747 |
| H  | -2.64329 | 4.72918  | -0.78044 |
| C  | 4.21263  | 0.01143  | 1.04896  |
| H  | 5.26182  | 0.32137  | 1.09372  |
| H  | 3.59197  | 0.81890  | 1.44914  |
| H  | 4.08037  | -0.86423 | 1.69151  |
| C  | 4.09952  | 0.91478  | -1.30821 |
| H  | 5.17498  | 1.11049  | -1.33630 |
| H  | 3.75420  | 0.74964  | -2.33381 |
| H  | 3.63131  | 1.82807  | -0.92240 |
| C  | 4.71152  | -1.48362 | -0.91708 |
| H  | 5.75749  | -1.16417 | -0.93200 |
| H  | 4.64593  | -2.35522 | -0.25932 |
| H  | 4.43241  | -1.78722 | -1.93135 |

2Ph-4Ph-6tBu-pyridine

45

|   |          |          |          |
|---|----------|----------|----------|
| C | 1.69038  | -0.55094 | 0.06740  |
| C | 0.56781  | -1.36222 | -0.00384 |
| N | -0.64244 | -0.75666 | -0.13599 |
| H | -1.45389 | -1.36027 | -0.22619 |
| H | 2.65523  | -1.01268 | 0.22725  |
| C | -0.84239 | 0.58749  | -0.19495 |
| C | 0.27668  | 1.39602  | -0.12288 |
| H | 0.15515  | 2.46637  | -0.19663 |

|    |          |          |          |
|----|----------|----------|----------|
| C  | 1.56671  | 0.84488  | 0.00428  |
| C  | 2.75469  | 1.71332  | 0.08097  |
| C  | 2.67507  | 2.98215  | 0.68052  |
| C  | 3.98522  | 1.28456  | -0.44632 |
| C  | 3.80061  | 3.79826  | 0.75488  |
| H  | 1.74096  | 3.31709  | 1.11965  |
| C  | 5.10570  | 2.10814  | -0.38030 |
| H  | 4.05753  | 0.32005  | -0.93853 |
| C  | 5.01731  | 3.36520  | 0.22254  |
| H  | 3.72894  | 4.77020  | 1.23282  |
| H  | 6.04644  | 1.77067  | -0.80386 |
| H  | 5.89300  | 4.00467  | 0.27712  |
| Cl | -6.74475 | 1.78058  | 0.27189  |
| C  | -2.27758 | 1.06203  | -0.36758 |
| C  | 0.60261  | -2.82950 | 0.07300  |
| C  | 1.67528  | -3.53024 | -0.50184 |
| C  | -0.42485 | -3.54161 | 0.71421  |
| C  | 1.71321  | -4.92034 | -0.44159 |
| H  | 2.45995  | -2.98892 | -1.01990 |
| C  | -0.37966 | -4.93222 | 0.77224  |
| H  | -1.23740 | -3.01550 | 1.20663  |
| C  | 0.68670  | -5.62364 | 0.19352  |
| H  | 2.54014  | -5.45489 | -0.89786 |
| H  | -1.17187 | -5.47366 | 1.27901  |
| H  | 0.71913  | -6.70768 | 0.23953  |
| C  | -2.81248 | 0.55407  | -1.72756 |
| H  | -2.82380 | -0.53966 | -1.78971 |
| H  | -3.84208 | 0.90120  | -1.85478 |
| H  | -2.20888 | 0.93785  | -2.55614 |
| C  | -2.35632 | 2.59643  | -0.34278 |
| H  | -1.80031 | 3.04665  | -1.17147 |
| H  | -3.40381 | 2.89470  | -0.43901 |
| H  | -1.97646 | 3.00459  | 0.59945  |
| C  | -3.15287 | 0.50324  | 0.77795  |
| H  | -2.78608 | 0.83986  | 1.75300  |
| H  | -4.17537 | 0.86765  | 0.63412  |
| H  | -3.18971 | -0.59197 | 0.78397  |

2Ph-5Ph-6tBu-pyridine

45

|   |         |          |          |
|---|---------|----------|----------|
| C | 1.04653 | -1.34473 | -0.76648 |
| C | 1.78352 | -0.24733 | -0.35010 |
| N | 1.08294 | 0.84911  | 0.04364  |
| H | 1.63281 | 1.65217  | 0.32968  |

|    |          |          |          |
|----|----------|----------|----------|
| H  | 1.54959  | -2.26091 | -1.04560 |
| C  | -0.26851 | 0.99445  | 0.07206  |
| C  | -0.34006 | -1.26193 | -0.77003 |
| H  | -0.92131 | -2.12612 | -1.06445 |
| C  | -1.02408 | -0.10062 | -0.37469 |
| C  | -2.51490 | -0.14264 | -0.45454 |
| C  | -3.18764 | 0.39705  | -1.55759 |
| C  | -3.24316 | -0.82335 | 0.53054  |
| C  | -4.57705 | 0.30088  | -1.65019 |
| H  | -2.62320 | 0.88146  | -2.34813 |
| C  | -4.63152 | -0.91570 | 0.43636  |
| H  | -2.71589 | -1.28446 | 1.35921  |
| C  | -5.30202 | -0.34712 | -0.64904 |
| H  | -5.08902 | 0.72690  | -2.50776 |
| H  | -5.18842 | -1.43695 | 1.20928  |
| H  | -6.38323 | -0.41956 | -0.72002 |
| Cl | -0.94197 | -3.87826 | 1.33883  |
| C  | -0.79307 | 2.34247  | 0.58960  |
| C  | 3.25076  | -0.19334 | -0.28823 |
| C  | 3.90745  | 0.52414  | 0.72566  |
| C  | 4.00918  | -0.87307 | -1.25511 |
| C  | 5.29896  | 0.56570  | 0.76349  |
| H  | 3.34159  | 1.01349  | 1.51313  |
| C  | 5.39975  | -0.82697 | -1.21172 |
| H  | 3.50975  | -1.41249 | -2.05311 |
| C  | 6.04722  | -0.10689 | -0.20484 |
| H  | 5.79739  | 1.11336  | 1.55680  |
| H  | 5.97776  | -1.34742 | -1.96863 |
| H  | 7.13176  | -0.07333 | -0.17275 |
| C  | -1.84401 | 2.11192  | 1.69829  |
| H  | -1.42981 | 1.50978  | 2.51360  |
| H  | -2.13983 | 3.08345  | 2.10652  |
| H  | -2.73860 | 1.61688  | 1.32260  |
| C  | -1.41744 | 3.13954  | -0.57875 |
| H  | -0.70113 | 3.26880  | -1.39677 |
| H  | -2.31078 | 2.65177  | -0.96868 |
| H  | -1.70409 | 4.13168  | -0.21533 |
| C  | 0.33703  | 3.20134  | 1.19656  |
| H  | 0.83429  | 2.70347  | 2.03665  |
| H  | 1.08602  | 3.50921  | 0.45617  |
| H  | -0.10432 | 4.12262  | 1.58433  |

2Ph-5tBu-234azabenzvalene-C23insertion\_ring-opening\_TS

|    |          |          |          |
|----|----------|----------|----------|
| C  | -1.32971 | -1.07087 | 0.52643  |
| C  | -2.35788 | -0.17523 | 0.14909  |
| N  | -1.78360 | 0.98678  | -0.23351 |
| H  | -2.29041 | 1.70365  | -0.74015 |
| H  | -1.55655 | -1.95223 | 1.11723  |
| C  | -0.46145 | 1.10501  | 0.06146  |
| C  | 0.02035  | -0.01018 | 0.93721  |
| H  | 0.62975  | 0.11824  | 1.83660  |
| C  | 0.06210  | -1.03885 | -0.00208 |
| C  | 0.97963  | -2.02966 | -0.43744 |
| C  | 2.36101  | -1.88134 | -0.16871 |
| C  | 0.52514  | -3.14395 | -1.17990 |
| C  | 3.25849  | -2.83170 | -0.63795 |
| H  | 2.69912  | -1.03491 | 0.42290  |
| C  | 1.43110  | -4.09603 | -1.62582 |
| H  | -0.53569 | -3.24474 | -1.38840 |
| C  | 2.79791  | -3.93838 | -1.36172 |
| H  | 4.31883  | -2.72148 | -0.43271 |
| H  | 1.08224  | -4.95736 | -2.18675 |
| H  | 3.50461  | -4.68057 | -1.72061 |
| Cl | 2.99396  | 0.23029  | 2.90193  |
| C  | -3.84579 | -0.35369 | 0.32503  |
| C  | -4.25129 | -1.76582 | -0.14168 |
| H  | -4.01750 | -1.91100 | -1.20130 |
| H  | -3.73890 | -2.54423 | 0.43284  |
| H  | -5.32835 | -1.90429 | -0.00298 |
| C  | -4.18971 | -0.18101 | 1.82539  |
| H  | -3.90484 | 0.81448  | 2.18049  |
| H  | -5.26828 | -0.30608 | 1.97120  |
| H  | -3.67239 | -0.92667 | 2.43729  |
| C  | -4.61452 | 0.69753  | -0.49695 |
| H  | -5.68851 | 0.52142  | -0.38854 |
| H  | -4.41914 | 1.71754  | -0.14670 |
| H  | -4.37137 | 0.63317  | -1.56332 |
| C  | 0.38778  | 2.17504  | -0.41066 |
| C  | 1.66974  | 2.34031  | 0.15727  |
| C  | -0.03307 | 3.07072  | -1.41747 |
| C  | 2.48932  | 3.38343  | -0.26225 |
| H  | 2.02442  | 1.66086  | 0.92913  |
| C  | 0.79229  | 4.11313  | -1.82118 |
| H  | -0.99771 | 2.94961  | -1.90058 |
| C  | 2.05729  | 4.27510  | -1.24698 |
| H  | 3.47185  | 3.49944  | 0.18527  |
| H  | 0.45254  | 4.79495  | -2.59465 |
| H  | 2.70179  | 5.08645  | -1.57101 |

## 2Ph-5tBu-234azabenzvalene-forming\_TS

45

|    |          |          |          |
|----|----------|----------|----------|
| C  | -0.81705 | -0.12371 | -1.60316 |
| C  | -1.60734 | -0.36405 | -0.50685 |
| N  | -0.92587 | -1.03810 | 0.50478  |
| H  | -1.40686 | -1.85499 | 0.87022  |
| H  | -1.07098 | 0.52556  | -2.43001 |
| C  | 0.44646  | -1.23723 | 0.04167  |
| C  | 0.52495  | -0.76034 | -1.46099 |
| H  | 1.09024  | -1.18111 | -2.28600 |
| C  | 1.06543  | 0.02704  | -0.37269 |
| C  | 1.44632  | 1.29725  | 0.08427  |
| C  | 1.85729  | 2.30510  | -0.82460 |
| C  | 1.36472  | 1.58480  | 1.46887  |
| C  | 2.16531  | 3.56804  | -0.35368 |
| H  | 1.92965  | 2.06169  | -1.87768 |
| C  | 1.69130  | 2.85127  | 1.93154  |
| H  | 1.03803  | 0.80868  | 2.15097  |
| C  | 2.08827  | 3.83888  | 1.02257  |
| H  | 2.47632  | 4.34726  | -1.04144 |
| H  | 1.63313  | 3.07806  | 2.99073  |
| H  | 2.34101  | 4.83029  | 1.38612  |
| Cl | 4.08401  | -0.26332 | -1.33035 |
| C  | 1.25596  | -2.41928 | 0.64736  |
| C  | -3.01375 | -0.01770 | -0.31493 |
| C  | -3.55762 | 0.02238  | 0.98100  |
| C  | -3.84277 | 0.26592  | -1.41525 |
| C  | -4.90170 | 0.33571  | 1.17027  |
| H  | -2.91578 | -0.16763 | 1.83485  |
| C  | -5.18214 | 0.58528  | -1.22026 |
| H  | -3.43816 | 0.21637  | -2.42101 |
| C  | -5.71633 | 0.61880  | 0.07216  |
| H  | -5.31035 | 0.36786  | 2.17559  |
| H  | -5.81418 | 0.80044  | -2.07633 |
| H  | -6.76313 | 0.86612  | 0.22067  |
| C  | 2.19444  | -1.89774 | 1.74947  |
| H  | 2.74070  | -2.73455 | 2.19820  |
| H  | 2.92332  | -1.19292 | 1.33972  |
| H  | 1.63004  | -1.40225 | 2.54756  |
| C  | 2.07037  | -3.11441 | -0.45512 |
| H  | 2.65071  | -3.93158 | -0.01231 |
| H  | 1.40813  | -3.54268 | -1.21554 |
| H  | 2.76669  | -2.41997 | -0.93255 |
| C  | 0.29228  | -3.45491 | 1.25890  |

|   |          |          |         |
|---|----------|----------|---------|
| H | 0.87683  | -4.30921 | 1.61378 |
| H | -0.25322 | -3.05735 | 2.12224 |
| H | -0.42562 | -3.83136 | 0.52131 |

2Ph-5tBu-234azabenzvalene

45

|    |          |          |          |
|----|----------|----------|----------|
| C  | 1.49636  | 0.73918  | 0.91069  |
| C  | 2.43943  | -0.16705 | 0.22773  |
| N  | 1.69730  | -1.10081 | -0.29420 |
| H  | 2.01940  | -1.90415 | -0.82081 |
| H  | 1.80724  | 1.62148  | 1.45270  |
| C  | 0.28862  | -0.81095 | 0.03594  |
| C  | 0.27346  | -0.07866 | 1.35398  |
| H  | -0.30005 | -0.14421 | 2.27593  |
| C  | 0.15493  | 0.71208  | 0.14898  |
| C  | -0.76668 | 1.71772  | -0.38521 |
| C  | -2.01228 | 1.91931  | 0.22680  |
| C  | -0.42152 | 2.44887  | -1.53087 |
| C  | -2.90601 | 2.84445  | -0.31263 |
| H  | -2.26707 | 1.35396  | 1.12026  |
| C  | -1.31495 | 3.37772  | -2.05977 |
| H  | 0.54595  | 2.28687  | -1.99737 |
| C  | -2.55915 | 3.57360  | -1.45251 |
| H  | -3.87159 | 2.99959  | 0.15966  |
| H  | -1.04463 | 3.94646  | -2.94442 |
| H  | -3.25604 | 4.29601  | -1.86747 |
| Cl | -2.43931 | -0.13320 | 3.56380  |
| C  | 3.92696  | -0.04472 | 0.12786  |
| C  | 4.22749  | 1.29981  | -0.58085 |
| H  | 3.81585  | 1.31164  | -1.59487 |
| H  | 3.81702  | 2.14958  | -0.02777 |
| H  | 5.31255  | 1.42552  | -0.64578 |
| C  | 4.49932  | -0.01865 | 1.56540  |
| H  | 4.28885  | -0.95539 | 2.09043  |
| H  | 5.58440  | 0.11001  | 1.50788  |
| H  | 4.08793  | 0.80908  | 2.15013  |
| C  | 4.53921  | -1.20872 | -0.66527 |
| H  | 5.62411  | -1.08010 | -0.71114 |
| H  | 4.34005  | -2.17328 | -0.18570 |
| H  | 4.16590  | -1.23737 | -1.69470 |
| C  | -0.78113 | -1.68404 | -0.49268 |
| C  | -1.94164 | -1.90252 | 0.26091  |
| C  | -0.66350 | -2.24832 | -1.76988 |
| C  | -2.96995 | -2.68560 | -0.26339 |

|   |          |          |          |
|---|----------|----------|----------|
| H | -2.04538 | -1.46090 | 1.24950  |
| C | -1.68920 | -3.04203 | -2.28117 |
| H | 0.21856  | -2.05833 | -2.37529 |
| C | -2.84542 | -3.26147 | -1.52928 |
| H | -3.86789 | -2.85058 | 0.32471  |
| H | -1.58803 | -3.47975 | -3.26961 |
| H | -3.64605 | -3.87590 | -1.93021 |

2Ph-5tBu-345azabenzvalene-C45insertion\_ring-opening\_TS

45

|    |          |          |          |
|----|----------|----------|----------|
| C  | 1.29373  | 0.82352  | 0.68829  |
| C  | 1.80459  | -0.39753 | 0.18180  |
| N  | 0.74180  | -1.22788 | -0.04180 |
| H  | 0.79730  | -2.02566 | -0.66674 |
| H  | 1.94543  | 1.51755  | 1.20801  |
| C  | -0.42440 | -0.82150 | 0.48950  |
| C  | -0.25058 | 0.36673  | 1.37435  |
| H  | -0.65429 | 0.44746  | 2.38511  |
| C  | -0.06860 | 1.35932  | 0.40948  |
| C  | -0.57910 | 2.65415  | 0.12749  |
| C  | -1.84632 | 3.04933  | 0.61569  |
| C  | 0.16550  | 3.54758  | -0.67617 |
| C  | -2.34685 | 4.30724  | 0.30941  |
| H  | -2.42416 | 2.35940  | 1.22300  |
| C  | -0.33503 | 4.81139  | -0.95772 |
| H  | 1.13260  | 3.23536  | -1.05799 |
| C  | -1.59175 | 5.19153  | -0.47109 |
| H  | -3.32170 | 4.60704  | 0.68053  |
| H  | 0.24373  | 5.50081  | -1.56410 |
| H  | -1.98542 | 6.17605  | -0.70416 |
| Cl | -5.41963 | -3.37919 | -0.58806 |
| C  | -1.75496 | -1.46315 | 0.17685  |
| C  | 3.18031  | -0.81628 | 0.03231  |
| C  | 4.19859  | 0.14902  | -0.10477 |
| C  | 3.52635  | -2.18212 | -0.00693 |
| C  | 5.52056  | -0.24381 | -0.27750 |
| H  | 3.94501  | 1.20445  | -0.09328 |
| C  | 4.84936  | -2.56707 | -0.19890 |
| H  | 2.76451  | -2.94156 | 0.14039  |
| C  | 5.85100  | -1.60180 | -0.33166 |
| H  | 6.29502  | 0.50964  | -0.38205 |
| H  | 5.10166  | -3.62249 | -0.22766 |
| H  | 6.88379  | -1.90521 | -0.47209 |
| C  | -2.35618 | -0.81882 | -1.09607 |

|   |          |          |          |
|---|----------|----------|----------|
| H | -1.69011 | -0.95095 | -1.95497 |
| H | -3.31408 | -1.30212 | -1.31255 |
| H | -2.52486 | 0.25327  | -0.95456 |
| C | -2.72040 | -1.25713 | 1.36011  |
| H | -2.91690 | -0.19505 | 1.54406  |
| H | -3.67079 | -1.74211 | 1.11934  |
| H | -2.32394 | -1.69976 | 2.28042  |
| C | -1.56879 | -2.97705 | -0.06379 |
| H | -1.09075 | -3.46325 | 0.79306  |
| H | -2.55813 | -3.41880 | -0.21613 |
| H | -0.97511 | -3.18386 | -0.96216 |

2Ph-5tBu-345azabenzvalene-forming\_TS

45

|    |          |          |          |
|----|----------|----------|----------|
| C  | -1.67501 | -0.09416 | -1.50287 |
| C  | -2.15663 | -0.78362 | -0.42292 |
| N  | -1.12984 | -1.25551 | 0.38160  |
| H  | -1.16419 | -2.22898 | 0.67236  |
| H  | -2.25867 | 0.51278  | -2.18013 |
| C  | 0.12073  | -0.80057 | -0.20283 |
| C  | -0.17598 | -0.17397 | -1.60925 |
| H  | 0.36363  | -0.24341 | -2.54810 |
| C  | 0.17944  | 0.64831  | -0.48524 |
| C  | 0.28552  | 1.92073  | 0.09397  |
| C  | 0.26671  | 3.08836  | -0.70897 |
| C  | 0.35999  | 2.03174  | 1.50361  |
| C  | 0.30793  | 4.33327  | -0.10730 |
| H  | 0.22640  | 2.98303  | -1.78667 |
| C  | 0.41867  | 3.28527  | 2.09483  |
| H  | 0.36995  | 1.13048  | 2.10618  |
| C  | 0.38899  | 4.43108  | 1.29123  |
| H  | 0.28839  | 5.23356  | -0.71225 |
| H  | 0.48057  | 3.37836  | 3.17377  |
| H  | 0.43055  | 5.41149  | 1.75583  |
| Cl | 2.94970  | 1.06739  | -1.85682 |
| C  | -3.59657 | -1.02380 | -0.02639 |
| C  | 1.33985  | -1.56532 | 0.19495  |
| C  | 2.11251  | -2.23615 | -0.75587 |
| C  | 1.66965  | -1.66074 | 1.55244  |
| C  | 3.21365  | -2.99094 | -0.35302 |
| H  | 1.85593  | -2.15810 | -1.80628 |
| C  | 2.76963  | -2.41793 | 1.95406  |
| H  | 1.06098  | -1.15057 | 2.29323  |
| C  | 3.54458  | -3.08218 | 1.00081  |



|   |          |          |          |
|---|----------|----------|----------|
| H | 3.81211  | -3.50846 | -1.09670 |
| H | 3.02102  | -2.48662 | 3.00815  |
| H | 4.40353  | -3.66928 | 1.31220  |
| C | -3.87952 | -0.22528 | 1.26695  |
| H | -3.73046 | 0.84717  | 1.10267  |
| H | -4.91701 | -0.38579 | 1.57965  |
| H | -3.21749 | -0.54365 | 2.07757  |
| C | -4.54890 | -0.55909 | -1.13888 |
| H | -4.35661 | -1.09072 | -2.07666 |
| H | -5.58350 | -0.75556 | -0.84067 |
| H | -4.45307 | 0.51586  | -1.32400 |
| C | -3.81488 | -2.52940 | 0.23774  |
| H | -4.86472 | -2.70479 | 0.49322  |
| H | -3.57392 | -3.12609 | -0.64837 |
| H | -3.21170 | -2.89147 | 1.07737  |

2Ph-5tBu-345azabenzvalene

45

|    |          |          |          |
|----|----------|----------|----------|
| C  | -1.31125 | 0.73964  | -1.11074 |
| C  | -1.90117 | -0.38988 | -0.36044 |
| N  | -0.87630 | -1.13923 | -0.03268 |
| H  | -0.90199 | -2.00254 | 0.49344  |
| H  | -1.88773 | 1.55969  | -1.51412 |
| C  | 0.35401  | -0.50133 | -0.54605 |
| C  | -0.03275 | 0.26380  | -1.79038 |
| H  | 0.33354  | 0.35416  | -2.80401 |
| C  | 0.11273  | 0.99949  | -0.54951 |
| C  | 0.78160  | 2.21144  | -0.06209 |
| C  | 1.38472  | 3.10520  | -0.95681 |
| C  | 0.81353  | 2.47874  | 1.31431  |
| C  | 2.01291  | 4.25461  | -0.47967 |
| H  | 1.36429  | 2.89106  | -2.02114 |
| C  | 1.44791  | 3.62487  | 1.78903  |
| H  | 0.34169  | 1.78520  | 2.00388  |
| C  | 2.04689  | 4.51428  | 0.89261  |
| H  | 2.48015  | 4.94355  | -1.17674 |
| H  | 1.47466  | 3.82532  | 2.85574  |
| H  | 2.54112  | 5.40726  | 1.26346  |
| Cl | 5.31189  | -3.34964 | 0.46417  |
| C  | 1.67492  | -1.20409 | -0.29302 |
| C  | -3.28777 | -0.62737 | -0.03194 |
| C  | -4.27702 | 0.22989  | -0.55180 |
| C  | -3.66957 | -1.70284 | 0.79682  |
| C  | -5.61705 | 0.01350  | -0.25091 |

|   |          |          |          |
|---|----------|----------|----------|
| H | -3.99993 | 1.05713  | -1.19433 |
| C | -5.00889 | -1.91109 | 1.09402  |
| H | -2.92462 | -2.37003 | 1.21734  |
| C | -5.98421 | -1.05442 | 0.57070  |
| H | -6.37378 | 0.67643  | -0.65658 |
| H | -5.29615 | -2.73805 | 1.73461  |
| H | -7.03068 | -1.22082 | 0.80612  |
| C | 1.94107  | -1.26950 | 1.22331  |
| H | 1.15361  | -1.81587 | 1.75591  |
| H | 2.88856  | -1.78814 | 1.39804  |
| H | 2.00530  | -0.26379 | 1.65167  |
| C | 2.81757  | -0.42948 | -0.97337 |
| H | 2.91059  | 0.58627  | -0.57878 |
| H | 3.75524  | -0.96054 | -0.78482 |
| H | 2.67144  | -0.36750 | -2.05734 |
| C | 1.61693  | -2.62634 | -0.88441 |
| H | 1.40808  | -2.59517 | -1.95939 |
| H | 2.58189  | -3.11686 | -0.72538 |
| H | 0.84601  | -3.24306 | -0.40766 |

2Ph-5tBu-endoCl-C23\_ring\_opening\_TS

45

|    |          |          |          |
|----|----------|----------|----------|
| C  | 1.89250  | -0.97614 | -1.32486 |
| C  | 2.47629  | -0.14607 | -0.41857 |
| N  | 1.53585  | 0.64145  | 0.24779  |
| H  | 1.77082  | 1.61777  | 0.37799  |
| H  | 2.45079  | -1.57841 | -2.02876 |
| C  | 0.20080  | 0.38528  | -0.07336 |
| C  | 0.45062  | -0.99269 | -1.30736 |
| H  | -0.10911 | -1.23890 | -2.20618 |
| C  | -0.26658 | -1.01008 | -0.02430 |
| C  | -1.74113 | -1.28702 | -0.01687 |
| C  | -2.30692 | -2.16345 | -0.94730 |
| C  | -2.56060 | -0.71066 | 0.96340  |
| C  | -3.67535 | -2.44001 | -0.91793 |
| H  | -1.68005 | -2.63865 | -1.69493 |
| C  | -3.92455 | -0.98606 | 0.99521  |
| H  | -2.12442 | -0.04045 | 1.69656  |
| C  | -4.48780 | -1.84871 | 0.04960  |
| H  | -4.10285 | -3.11926 | -1.64959 |
| H  | -4.54978 | -0.52729 | 1.75555  |
| H  | -5.55276 | -2.06089 | 0.07161  |
| Cl | 0.49273  | -2.08680 | 1.39148  |
| C  | 3.94277  | 0.02874  | -0.08260 |

|   |          |          |          |
|---|----------|----------|----------|
| C | -0.71603 | 1.55008  | -0.10136 |
| C | -0.65385 | 2.51222  | 0.91916  |
| C | -1.65314 | 1.71266  | -1.13069 |
| C | -1.51567 | 3.60927  | 0.91001  |
| H | 0.05205  | 2.39006  | 1.73592  |
| C | -2.51824 | 2.80479  | -1.13319 |
| H | -1.69968 | 0.97821  | -1.92790 |
| C | -2.45252 | 3.75799  | -0.11396 |
| H | -1.45937 | 4.34163  | 1.71002  |
| H | -3.23935 | 2.91575  | -1.93772 |
| H | -3.12538 | 4.61032  | -0.11884 |
| C | 4.19495  | -0.47622 | 1.35500  |
| H | 5.25041  | -0.34685 | 1.62141  |
| H | 3.58615  | 0.07700  | 2.07721  |
| H | 3.94228  | -1.53787 | 1.44232  |
| C | 4.33847  | 1.51906  | -0.17434 |
| H | 5.41059  | 1.63175  | 0.01918  |
| H | 4.12563  | 1.92375  | -1.16985 |
| H | 3.81471  | 2.13225  | 0.56839  |
| C | 4.80999  | -0.77738 | -1.06185 |
| H | 5.86819  | -0.64771 | -0.81206 |
| H | 4.57888  | -1.84640 | -1.00861 |
| H | 4.66077  | -0.44393 | -2.09449 |

2Ph-5tBu-endoCl-C34\_ring\_opening\_TS

45

|    |          |          |          |
|----|----------|----------|----------|
| Cl | 0.90883  | -0.03966 | 2.05649  |
| C  | 1.13766  | -0.28100 | 0.25334  |
| C  | 2.40240  | -1.02749 | -0.02433 |
| C  | 3.61082  | -0.33798 | -0.17960 |
| C  | 4.79600  | -1.03520 | -0.41280 |
| C  | 4.78216  | -2.43000 | -0.49188 |
| C  | 3.58022  | -3.12422 | -0.33446 |
| C  | 2.39589  | -2.42516 | -0.10092 |
| C  | -0.06523 | -0.58278 | -0.57492 |
| H  | 0.02797  | -1.39775 | -1.28884 |
| C  | -1.38583 | -0.15528 | -0.13923 |
| C  | -2.59575 | -0.92525 | -0.13621 |
| C  | -2.53784 | -2.33753 | -0.23721 |
| C  | -3.69592 | -3.10788 | -0.25569 |
| C  | -4.95527 | -2.51044 | -0.14424 |
| C  | -5.03180 | -1.11800 | -0.02851 |
| C  | -3.88182 | -0.33669 | -0.03551 |
| N  | -1.34088 | 1.19386  | 0.08577  |

|   |          |          |          |
|---|----------|----------|----------|
| H | -2.12753 | 1.69192  | 0.48519  |
| C | -0.20781 | 1.83047  | -0.24737 |
| C | -0.04155 | 3.32951  | -0.24858 |
| C | 1.11922  | 3.71725  | 0.69549  |
| C | 0.29624  | 3.79829  | -1.68316 |
| C | -1.32807 | 4.03176  | 0.21734  |
| C | 0.77869  | 0.85070  | -0.66260 |
| H | 1.51970  | 1.11227  | -1.41376 |
| H | 3.61943  | 0.74641  | -0.11420 |
| H | 5.72856  | -0.49156 | -0.53308 |
| H | 5.70440  | -2.97365 | -0.67536 |
| H | 3.56521  | -4.20862 | -0.39358 |
| H | 1.46085  | -2.96335 | 0.02616  |
| H | -1.56892 | -2.82599 | -0.28190 |
| H | -3.61293 | -4.18860 | -0.33971 |
| H | -5.85708 | -3.11514 | -0.14486 |
| H | -6.00115 | -0.63246 | 0.05156  |
| H | -3.98675 | 0.74423  | 0.01265  |
| H | 2.05387  | 3.24062  | 0.38106  |
| H | 0.90740  | 3.39990  | 1.72178  |
| H | 1.27046  | 4.80323  | 0.68987  |
| H | 1.21085  | 3.32342  | -2.05383 |
| H | 0.45538  | 4.88258  | -1.69596 |
| H | -0.51905 | 3.55934  | -2.37407 |
| H | -1.59273 | 3.75162  | 1.24414  |
| H | -2.17558 | 3.80420  | -0.43987 |
| H | -1.18098 | 5.11604  | 0.20219  |

2Ph-5tBu-endoCl-C45\_ring\_opening\_TS

45

|   |          |          |          |
|---|----------|----------|----------|
| C | 1.08705  | -0.78089 | -1.49507 |
| C | 1.79662  | -0.15203 | -0.51128 |
| N | 0.99989  | 0.71633  | 0.23216  |
| H | 1.42699  | 1.59134  | 0.50497  |
| H | 1.54057  | -1.40106 | -2.25764 |
| C | -0.35806 | 0.74258  | -0.08015 |
| C | -0.33193 | -0.58601 | -1.43266 |
| H | -0.93795 | -0.69433 | -2.32663 |
| C | -1.01380 | -0.57809 | -0.12649 |
| C | -2.50518 | -0.73256 | -0.04908 |
| C | -3.25456 | -1.20601 | -1.12875 |
| C | -3.16536 | -0.43416 | 1.15291  |
| C | -4.64207 | -1.33468 | -1.02706 |
| H | -2.76820 | -1.47398 | -2.05957 |

|    |          |          |          |
|----|----------|----------|----------|
| C  | -4.54632 | -0.56237 | 1.25732  |
| H  | -2.58446 | -0.11034 | 2.00974  |
| C  | -5.29316 | -1.00592 | 0.16064  |
| H  | -5.21007 | -1.69489 | -1.87970 |
| H  | -5.04122 | -0.31946 | 2.19295  |
| H  | -6.37197 | -1.10344 | 0.23821  |
| Cl | -0.31820 | -1.85832 | 1.18009  |
| C  | -1.01153 | 2.13540  | -0.09380 |
| C  | 3.22221  | -0.25182 | -0.19383 |
| C  | 3.69767  | 0.10313  | 1.08054  |
| C  | 4.14868  | -0.69052 | -1.15756 |
| C  | 5.05810  | 0.02765  | 1.37943  |
| H  | 2.99350  | 0.41395  | 1.84611  |
| C  | 5.50402  | -0.77106 | -0.85354 |
| H  | 3.80415  | -0.95197 | -2.15331 |
| C  | 5.96746  | -0.41014 | 0.41601  |
| H  | 5.40455  | 0.30316  | 2.37146  |
| H  | 6.20407  | -1.10897 | -1.61237 |
| H  | 7.02627  | -0.47156 | 0.64940  |
| C  | -1.21534 | 2.62855  | 1.35607  |
| H  | -0.27591 | 2.62564  | 1.91988  |
| H  | -1.59905 | 3.65509  | 1.34897  |
| H  | -1.93470 | 2.00185  | 1.88946  |
| C  | -2.35673 | 2.17648  | -0.84505 |
| H  | -2.26601 | 1.73281  | -1.84170 |
| H  | -3.15707 | 1.66611  | -0.31204 |
| H  | -2.65313 | 3.22362  | -0.96649 |
| C  | -0.06683 | 3.11237  | -0.83610 |
| H  | 0.87449  | 3.29329  | -0.30732 |
| H  | 0.17053  | 2.73720  | -1.83702 |
| H  | -0.56075 | 4.08355  | -0.93898 |

2Ph-5tBu-endoCl\_C23-cyclopropane

45

|   |          |          |          |
|---|----------|----------|----------|
| C | -1.89809 | -0.84681 | 1.33271  |
| C | -2.50595 | -0.08450 | 0.39901  |
| N | -1.56332 | 0.61417  | -0.38806 |
| H | -1.75637 | 1.59989  | -0.53161 |
| H | -2.38985 | -1.51912 | 2.02086  |
| C | -0.23674 | 0.35535  | 0.12979  |
| C | -0.42650 | -0.69777 | 1.25203  |
| H | 0.17548  | -0.73495 | 2.15707  |
| C | 0.28280  | -1.06426 | -0.03717 |
| C | 1.75725  | -1.31189 | -0.01601 |

|    |          |          |          |
|----|----------|----------|----------|
| C  | 2.34047  | -2.05107 | 1.01776  |
| C  | 2.56945  | -0.82150 | -1.04783 |
| C  | 3.71648  | -2.28819 | 1.02958  |
| H  | 1.71593  | -2.44212 | 1.81546  |
| C  | 3.94197  | -1.05765 | -1.03872 |
| H  | 2.11952  | -0.24598 | -1.85050 |
| C  | 4.51974  | -1.79018 | 0.00288  |
| H  | 4.15843  | -2.86180 | 1.83913  |
| H  | 4.56276  | -0.66717 | -1.83993 |
| H  | 5.59078  | -1.97072 | 0.01254  |
| Cl | -0.54659 | -2.14960 | -1.23361 |
| C  | -3.97641 | 0.05183  | 0.07055  |
| C  | 0.70861  | 1.50653  | 0.12124  |
| C  | 0.79666  | 2.31637  | -1.02063 |
| C  | 1.53186  | 1.78643  | 1.21660  |
| C  | 1.69085  | 3.38554  | -1.06305 |
| H  | 0.17337  | 2.09809  | -1.88334 |
| C  | 2.43217  | 2.85108  | 1.17155  |
| H  | 1.47148  | 1.16739  | 2.10584  |
| C  | 2.51397  | 3.65467  | 0.03277  |
| H  | 1.74945  | 4.00302  | -1.95468 |
| H  | 3.06635  | 3.05507  | 2.02945  |
| H  | 3.21408  | 4.48424  | -0.00120 |
| C  | -4.38835 | 1.53917  | 0.14275  |
| H  | -3.86370 | 2.14698  | -0.60329 |
| H  | -5.46122 | 1.63902  | -0.05503 |
| H  | -4.18232 | 1.95680  | 1.13440  |
| C  | -4.82180 | -0.75009 | 1.07166  |
| H  | -4.66113 | -0.40073 | 2.09728  |
| H  | -5.88528 | -0.63709 | 0.83571  |
| H  | -4.57712 | -1.81675 | 1.03025  |
| C  | -4.23104 | -0.47865 | -1.35660 |
| H  | -3.63704 | 0.07270  | -2.09162 |
| H  | -3.96191 | -1.53762 | -1.42925 |
| H  | -5.29089 | -0.37158 | -1.61502 |

2Ph-5tBu-endoCl\_C2attack\_C23-cyclopropanation\_TS

45

|   |         |          |          |
|---|---------|----------|----------|
| C | 1.68027 | -0.59113 | -1.49830 |
| C | 2.38888 | 0.13439  | -0.52327 |
| N | 1.49572 | 0.93569  | 0.10808  |
| H | 1.71581 | 1.51992  | 0.90090  |
| H | 2.10777 | -1.32739 | -2.16283 |
| C | 0.18731 | 0.69477  | -0.33394 |

|    |          |          |          |
|----|----------|----------|----------|
| C  | 0.33853  | -0.22626 | -1.40731 |
| H  | -0.47931 | -0.61623 | -1.99500 |
| C  | -0.51344 | -0.73522 | 1.14264  |
| C  | -1.62124 | -1.47469 | 0.49167  |
| C  | -1.59474 | -2.77182 | -0.06119 |
| C  | -2.85141 | -0.78128 | 0.49251  |
| C  | -2.74398 | -3.34537 | -0.59367 |
| H  | -0.65974 | -3.32182 | -0.07602 |
| C  | -4.00042 | -1.35193 | -0.05194 |
| H  | -2.88804 | 0.20634  | 0.93837  |
| C  | -3.95153 | -2.63628 | -0.59693 |
| H  | -2.70271 | -4.34649 | -1.01432 |
| H  | -4.93514 | -0.79837 | -0.04186 |
| H  | -4.84689 | -3.08744 | -1.01508 |
| Cl | 0.91479  | -1.82684 | 1.43656  |
| C  | 3.86341  | 0.12840  | -0.19402 |
| C  | -0.86457 | 1.71495  | -0.16738 |
| C  | -0.99490 | 2.42290  | 1.03761  |
| C  | -1.77986 | 1.96275  | -1.19885 |
| C  | -2.01046 | 3.36095  | 1.20143  |
| H  | -0.32368 | 2.20441  | 1.86198  |
| C  | -2.81006 | 2.88875  | -1.02677 |
| H  | -1.68553 | 1.43011  | -2.13918 |
| C  | -2.92758 | 3.59361  | 0.17121  |
| H  | -2.09817 | 3.90015  | 2.14032  |
| H  | -3.51572 | 3.06200  | -1.83415 |
| H  | -3.72621 | 4.31747  | 0.30456  |
| C  | 4.58645  | 1.07596  | -1.18060 |
| H  | 4.20775  | 2.09965  | -1.08994 |
| H  | 5.66148  | 1.08621  | -0.96803 |
| H  | 4.44234  | 0.74736  | -2.21499 |
| C  | 4.41895  | -1.29941 | -0.35640 |
| H  | 5.48894  | -1.30764 | -0.12260 |
| H  | 3.90942  | -1.99551 | 0.31704  |
| H  | 4.29775  | -1.66253 | -1.38178 |
| C  | 4.10921  | 0.60559  | 1.24920  |
| H  | 3.55900  | -0.00995 | 1.96834  |
| H  | 5.17650  | 0.53453  | 1.48140  |
| H  | 3.82001  | 1.65369  | 1.39057  |

2Ph-5tBu-endoCl\_C3-carbanion\_cyclopropanation-intermediate

45

|    |         |          |         |
|----|---------|----------|---------|
| Cl | 0.46984 | -0.41471 | 1.94113 |
| C  | 1.06605 | -0.72270 | 0.25475 |

|   |          |          |          |
|---|----------|----------|----------|
| C | 2.47998  | -0.67216 | 0.05934  |
| C | 3.42007  | -0.88901 | 1.11034  |
| C | 4.78071  | -0.99897 | 0.85975  |
| C | 5.29443  | -0.87870 | -0.43826 |
| C | 4.39803  | -0.63331 | -1.48358 |
| C | 3.03260  | -0.51688 | -1.25026 |
| C | 0.12877  | -0.10349 | -0.80414 |
| H | 0.35004  | -0.58070 | -1.76835 |
| C | -1.33076 | -0.23042 | -0.46774 |
| C | -2.06195 | -1.45533 | -0.37036 |
| C | -1.36618 | -2.66465 | -0.60156 |
| C | -2.01731 | -3.88587 | -0.44743 |
| C | -3.36511 | -3.92438 | -0.08857 |
| C | -4.06720 | -2.72973 | 0.13238  |
| C | -3.42698 | -1.50829 | -0.00237 |
| N | -1.79606 | 0.99659  | -0.25112 |
| H | -2.75106 | 1.19446  | 0.02204  |
| C | -0.80744 | 2.00258  | -0.38942 |
| C | -1.13186 | 3.43455  | -0.04273 |
| C | -1.47044 | 3.53469  | 1.46188  |
| C | 0.09089  | 4.31459  | -0.34687 |
| C | -2.33288 | 3.92253  | -0.88171 |
| C | 0.32549  | 1.38994  | -0.80233 |
| H | 1.28282  | 1.85579  | -0.97694 |
| H | 3.05644  | -0.98131 | 2.12778  |
| H | 5.45648  | -1.17243 | 1.69456  |
| H | 6.36122  | -0.95640 | -0.62518 |
| H | 4.76922  | -0.51126 | -2.49882 |
| H | 2.38157  | -0.29847 | -2.09006 |
| H | -0.31703 | -2.63112 | -0.86990 |
| H | -1.47309 | -4.80961 | -0.61858 |
| H | -3.87435 | -4.87770 | 0.01449  |
| H | -5.11574 | -2.75948 | 0.41170  |
| H | -3.98469 | -0.59508 | 0.18227  |
| H | -0.62967 | 3.18755  | 2.07112  |
| H | -2.34859 | 2.93387  | 1.72353  |
| H | -1.68747 | 4.57504  | 1.72808  |
| H | 0.95760  | 4.00645  | 0.24708  |
| H | -0.13495 | 5.35748  | -0.10277 |
| H | 0.36261  | 4.26259  | -1.40650 |
| H | -3.24123 | 3.34258  | -0.68104 |
| H | -2.11526 | 3.85386  | -1.95260 |
| H | -2.55316 | 4.96772  | -0.63996 |

2Ph-5tBu-endoCl\_C34-cyclopropanation\_step1\_C3attack\_TS



|    |          |          |          |
|----|----------|----------|----------|
| Cl | 0.24170  | -0.44483 | 2.01858  |
| C  | 0.47781  | -1.54337 | 0.56850  |
| C  | 1.92253  | -1.66897 | 0.25628  |
| C  | 3.00554  | -1.00352 | 0.86410  |
| C  | 4.31682  | -1.29071 | 0.49500  |
| C  | 4.57960  | -2.23894 | -0.49884 |
| C  | 3.51880  | -2.90787 | -1.11697 |
| C  | 2.20939  | -2.62888 | -0.73810 |
| C  | -0.18894 | -0.36440 | -1.10833 |
| H  | -0.17214 | -1.22473 | -1.75970 |
| C  | -1.39348 | 0.18608  | -0.59049 |
| C  | -2.67759 | -0.45117 | -0.36964 |
| C  | -2.74770 | -1.85667 | -0.31845 |
| C  | -3.96750 | -2.48973 | -0.09447 |
| C  | -5.13332 | -1.73847 | 0.07664  |
| C  | -5.07214 | -0.34258 | 0.02607  |
| C  | -3.85685 | 0.29830  | -0.19599 |
| N  | -1.11509 | 1.46417  | -0.23100 |
| H  | -1.73456 | 2.03895  | 0.32382  |
| C  | 0.20834  | 1.80770  | -0.52948 |
| C  | 0.76805  | 3.15999  | -0.16449 |
| C  | 0.64858  | 3.38316  | 1.35964  |
| C  | 2.25083  | 3.21755  | -0.56524 |
| C  | -0.00982 | 4.26660  | -0.91024 |
| C  | 0.76934  | 0.71616  | -1.13546 |
| H  | 1.78708  | 0.63819  | -1.48459 |
| H  | 2.80999  | -0.25554 | 1.62433  |
| H  | 5.13906  | -0.76921 | 0.97724  |
| H  | 5.60398  | -2.45724 | -0.78664 |
| H  | 3.71534  | -3.64972 | -1.88564 |
| H  | 1.37917  | -3.15520 | -1.20126 |
| H  | -1.82906 | -2.42705 | -0.40146 |
| H  | -4.00853 | -3.57422 | -0.04734 |
| H  | -6.08381 | -2.23578 | 0.24583  |
| H  | -5.97522 | 0.24749  | 0.15127  |
| H  | -3.83018 | 1.38229  | -0.26290 |
| H  | 1.17764  | 2.59829  | 1.90877  |
| H  | -0.39604 | 3.38015  | 1.69132  |
| H  | 1.07844  | 4.35416  | 1.63005  |
| H  | 2.82825  | 2.44277  | -0.04932 |
| H  | 2.67057  | 4.19287  | -0.29822 |
| H  | 2.37600  | 3.07736  | -1.64427 |
| H  | -1.07363 | 4.25960  | -0.64709 |
| H  | 0.07198  | 4.13633  | -1.99454 |

H 0.39266 5.25161 -0.64882

2Ph-5tBu-endoCl\_C34-cyclopropanation\_step1\_C4attack\_TS

45

|    |          |          |          |
|----|----------|----------|----------|
| Cl | 0.61638  | 0.00169  | 2.05972  |
| C  | 1.85959  | 0.35390  | 0.73313  |
| C  | 2.48585  | -0.92160 | 0.27945  |
| C  | 3.58281  | -0.75036 | -0.59279 |
| C  | 4.32233  | -1.83657 | -1.04929 |
| C  | 3.99417  | -3.13056 | -0.63186 |
| C  | 2.91820  | -3.32039 | 0.23892  |
| C  | 2.16792  | -2.23259 | 0.68220  |
| C  | -0.14012 | -0.32854 | -1.09253 |
| H  | 0.14721  | -1.29707 | -1.47322 |
| C  | -1.36321 | 0.00388  | -0.57645 |
| C  | -2.57565 | -0.78199 | -0.37240 |
| C  | -2.48658 | -2.18008 | -0.24472 |
| C  | -3.63256 | -2.95002 | -0.06847 |
| C  | -4.88905 | -2.34066 | -0.00103 |
| C  | -4.98806 | -0.95309 | -0.11940 |
| C  | -3.84407 | -0.17941 | -0.30896 |
| N  | -1.28616 | 1.36311  | -0.21140 |
| H  | -2.02429 | 1.85347  | 0.27675  |
| C  | -0.06871 | 1.87636  | -0.44499 |
| C  | 0.29586  | 3.30731  | -0.14182 |
| C  | 0.27251  | 3.53082  | 1.38836  |
| C  | 1.71068  | 3.59505  | -0.67111 |
| C  | -0.71904 | 4.25247  | -0.82132 |
| C  | 0.74343  | 0.80476  | -0.92766 |
| H  | 1.61753  | 0.98256  | -1.53496 |
| H  | 3.85078  | 0.25863  | -0.89587 |
| H  | 5.16122  | -1.67629 | -1.72077 |
| H  | 4.57430  | -3.98093 | -0.97852 |
| H  | 2.65708  | -4.32273 | 0.56791  |
| H  | 1.32536  | -2.39426 | 1.34528  |
| H  | -1.50984 | -2.65393 | -0.26358 |
| H  | -3.54426 | -4.02808 | 0.03042  |
| H  | -5.78135 | -2.94200 | 0.14478  |
| H  | -5.95958 | -0.46968 | -0.07378 |
| H  | -3.94567 | 0.89509  | -0.43356 |
| H  | 0.98772  | 2.86892  | 1.88120  |
| H  | -0.72069 | 3.33941  | 1.80926  |
| H  | 0.53787  | 4.57087  | 1.60742  |
| H  | 2.43039  | 2.90957  | -0.21469 |

|   |          |         |          |
|---|----------|---------|----------|
| H | 1.99385  | 4.62314 | -0.42291 |
| H | 1.75802  | 3.48392 | -1.76010 |
| H | -1.73585 | 4.10405 | -0.44099 |
| H | -0.73452 | 4.10032 | -1.90566 |
| H | -0.43853 | 5.29241 | -0.62323 |

2Ph-5tBu-endoCl\_C34-cyclopropanation\_step2formingC3bond\_TS

45

|    |          |          |          |
|----|----------|----------|----------|
| Cl | 0.79270  | 0.25268  | 1.99023  |
| C  | 1.43580  | 0.10842  | 0.35256  |
| C  | 2.50199  | -0.79872 | 0.08332  |
| C  | 2.96645  | -1.00566 | -1.25086 |
| C  | 4.05509  | -1.82820 | -1.51905 |
| C  | 4.73239  | -2.49369 | -0.49274 |
| C  | 4.28323  | -2.31573 | 0.82173  |
| C  | 3.19606  | -1.50123 | 1.10925  |
| C  | -0.16797 | -0.40204 | -0.96766 |
| H  | 0.21133  | -1.31621 | -1.39577 |
| C  | -1.44844 | -0.16622 | -0.49230 |
| C  | -2.56941 | -1.06150 | -0.27511 |
| C  | -2.35708 | -2.45631 | -0.27788 |
| C  | -3.41612 | -3.34055 | -0.09959 |
| C  | -4.71510 | -2.86329 | 0.10015  |
| C  | -4.93856 | -1.48431 | 0.11120  |
| C  | -3.88492 | -0.59365 | -0.07943 |
| N  | -1.49157 | 1.19702  | -0.16106 |
| H  | -2.32232 | 1.65091  | 0.20165  |
| C  | -0.34201 | 1.83486  | -0.30380 |
| C  | -0.14239 | 3.31455  | -0.16776 |
| C  | 1.14353  | 3.57448  | 0.64662  |
| C  | 0.02790  | 3.90765  | -1.59062 |
| C  | -1.34175 | 3.98279  | 0.52389  |
| C  | 0.67076  | 0.82856  | -0.75259 |
| H  | 1.33276  | 1.18355  | -1.54985 |
| H  | 2.46415  | -0.52275 | -2.08234 |
| H  | 4.37380  | -1.95503 | -2.55120 |
| H  | 5.57858  | -3.13833 | -0.71006 |
| H  | 4.78621  | -2.82697 | 1.63956  |
| H  | 2.87289  | -1.38718 | 2.13796  |
| H  | -1.34943 | -2.84047 | -0.40303 |
| H  | -3.22396 | -4.40996 | -0.10425 |
| H  | -5.53923 | -3.55492 | 0.24612  |
| H  | -5.94212 | -1.09608 | 0.26112  |
| H  | -4.10098 | 0.47122  | -0.09436 |

|   |          |         |          |
|---|----------|---------|----------|
| H | 2.00486  | 3.05947 | 0.20910  |
| H | 1.02990  | 3.22745 | 1.67723  |
| H | 1.35619  | 4.64836 | 0.65870  |
| H | 0.88470  | 3.46465 | -2.10815 |
| H | 0.19875  | 4.98703 | -1.51565 |
| H | -0.86850 | 3.73887 | -2.19578 |
| H | -1.50990 | 3.56639 | 1.52332  |
| H | -2.26235 | 3.88058 | -0.06279 |
| H | -1.14685 | 5.05341 | 0.63597  |

2Ph-5tBu-endoCl\_C34-cyclopropanation\_step2formingC4bond\_TS

45

|    |          |          |          |
|----|----------|----------|----------|
| Cl | 0.42686  | -0.36102 | 1.95006  |
| C  | 0.97989  | -0.63622 | 0.30320  |
| C  | 2.32238  | -1.07499 | 0.06778  |
| C  | 3.23555  | -1.35423 | 1.11996  |
| C  | 4.50887  | -1.84441 | 0.85964  |
| C  | 4.94555  | -2.06614 | -0.45159 |
| C  | 4.06870  | -1.78406 | -1.50298 |
| C  | 2.78829  | -1.29884 | -1.26014 |
| C  | -0.01314 | -0.37340 | -0.81514 |
| H  | 0.06308  | -1.08495 | -1.64356 |
| C  | -1.40607 | -0.03571 | -0.39768 |
| C  | -2.51105 | -0.93282 | -0.29267 |
| C  | -2.27981 | -2.32388 | -0.42889 |
| C  | -3.32374 | -3.23413 | -0.30395 |
| C  | -4.62330 | -2.79337 | -0.03810 |
| C  | -4.86733 | -1.42053 | 0.09856  |
| C  | -3.83520 | -0.50134 | -0.02998 |
| N  | -1.43085 | 1.29447  | -0.16406 |
| H  | -2.23860 | 1.76754  | 0.22343  |
| C  | -0.24730 | 1.94658  | -0.43165 |
| C  | -0.05693 | 3.41158  | -0.11898 |
| C  | -0.07606 | 3.62243  | 1.41259  |
| C  | 1.30062  | 3.87372  | -0.67359 |
| C  | -1.18089 | 4.24637  | -0.76913 |
| C  | 0.63851  | 0.99154  | -0.91097 |
| H  | 1.62315  | 1.16467  | -1.31237 |
| H  | 2.92700  | -1.18970 | 2.14600  |
| H  | 5.17395  | -2.05078 | 1.69472  |
| H  | 5.94501  | -2.44203 | -0.64793 |
| H  | 4.38483  | -1.94094 | -2.53135 |
| H  | 2.14433  | -1.08499 | -2.10613 |
| H  | -1.27231 | -2.68185 | -0.61481 |

|   |          |          |          |
|---|----------|----------|----------|
| H | -3.12091 | -4.29616 | -0.41018 |
| H | -5.43640 | -3.50619 | 0.05841  |
| H | -5.87456 | -1.06587 | 0.29844  |
| H | -4.05914 | 0.55816  | 0.05855  |
| H | 0.71467  | 3.03721  | 1.89282  |
| H | -1.03396 | 3.31499  | 1.84696  |
| H | 0.07852  | 4.68107  | 1.65162  |
| H | 2.12571  | 3.31921  | -0.21427 |
| H | 1.44595  | 4.93712  | -0.45773 |
| H | 1.35403  | 3.73547  | -1.75893 |
| H | -2.17099 | 3.97302  | -0.38585 |
| H | -1.18882 | 4.11264  | -1.85592 |
| H | -1.03052 | 5.30955  | -0.55233 |

2Ph-5tBu-endoCl\_C34-cyclopropane

45

|    |          |          |          |
|----|----------|----------|----------|
| Cl | 0.88981  | -0.04237 | 2.04883  |
| C  | 1.13256  | -0.28445 | 0.25096  |
| C  | 2.39486  | -1.03638 | -0.02093 |
| C  | 3.60737  | -0.35264 | -0.17001 |
| C  | 4.79029  | -1.05543 | -0.39797 |
| C  | 4.77005  | -2.45010 | -0.47811 |
| C  | 3.56398  | -3.13863 | -0.32732 |
| C  | 2.38194  | -2.43397 | -0.09903 |
| C  | -0.06670 | -0.57007 | -0.59225 |
| H  | 0.02759  | -1.38092 | -1.31069 |
| C  | -1.39061 | -0.14305 | -0.15656 |
| C  | -2.59846 | -0.91411 | -0.14395 |
| C  | -2.53954 | -2.32597 | -0.25543 |
| C  | -3.69623 | -3.09838 | -0.26443 |
| C  | -4.95551 | -2.50449 | -0.13390 |
| C  | -5.03298 | -1.11292 | -0.00789 |
| C  | -3.88487 | -0.32915 | -0.02308 |
| N  | -1.34128 | 1.20595  | 0.06787  |
| H  | -2.12723 | 1.70782  | 0.46407  |
| C  | -0.20259 | 1.83591  | -0.25594 |
| C  | -0.02094 | 3.33254  | -0.24590 |
| C  | 1.14372  | 3.70059  | 0.70135  |
| C  | 0.32245  | 3.80893  | -1.67675 |
| C  | -1.30015 | 4.04435  | 0.22545  |
| C  | 0.77658  | 0.84522  | -0.67221 |
| H  | 1.51953  | 1.10028  | -1.42363 |
| H  | 3.62072  | 0.73168  | -0.10413 |
| H  | 5.72606  | -0.51627 | -0.51337 |

|   |          |          |          |
|---|----------|----------|----------|
| H | 5.69053  | -2.99809 | -0.65749 |
| H | 3.54400  | -4.22289 | -0.38759 |
| H | 1.44348  | -2.96748 | 0.02265  |
| H | -1.57054 | -2.81249 | -0.31652 |
| H | -3.61201 | -4.17835 | -0.35681 |
| H | -5.85609 | -3.11095 | -0.12773 |
| H | -6.00214 | -0.62976 | 0.08764  |
| H | -3.99193 | 0.75107  | 0.03590  |
| H | 2.07304  | 3.21518  | 0.38452  |
| H | 0.92746  | 3.37935  | 1.72544  |
| H | 1.30763  | 4.78473  | 0.70245  |
| H | 1.23226  | 3.32724  | -2.05050 |
| H | 0.49284  | 4.89159  | -1.68129 |
| H | -0.49489 | 3.58363  | -2.36983 |
| H | -1.56836 | 3.75767  | 1.24951  |
| H | -2.14960 | 3.83181  | -0.43433 |
| H | -1.14157 | 5.12710  | 0.21995  |

2Ph-5tBu-endoCl\_C3attack\_C23-cyclopropanation\_TS

45

|    |          |          |          |
|----|----------|----------|----------|
| C  | 2.07942  | -0.74162 | -1.43824 |
| C  | 2.64415  | 0.10339  | -0.51968 |
| N  | 1.62629  | 0.92830  | -0.04407 |
| H  | 1.75838  | 1.65644  | 0.64198  |
| H  | 2.59017  | -1.52447 | -1.97845 |
| C  | 0.43181  | 0.63933  | -0.64116 |
| C  | 0.66304  | -0.48415 | -1.47663 |
| H  | -0.00826 | -0.80733 | -2.25652 |
| C  | -0.19744 | -1.99095 | -0.10337 |
| C  | -1.60701 | -1.59683 | 0.04767  |
| C  | -2.40853 | -1.90697 | -1.07480 |
| C  | -2.24256 | -1.03446 | 1.17431  |
| C  | -3.77934 | -1.67403 | -1.07176 |
| H  | -1.92802 | -2.35045 | -1.94261 |
| C  | -3.61468 | -0.80834 | 1.18085  |
| H  | -1.64906 | -0.77773 | 2.04379  |
| C  | -4.38782 | -1.12379 | 0.06004  |
| H  | -4.37483 | -1.92357 | -1.94520 |
| H  | -4.08466 | -0.37305 | 2.05806  |
| H  | -5.45884 | -0.94281 | 0.06923  |
| Cl | 0.71842  | -1.76280 | 1.46318  |
| C  | 4.06140  | 0.25168  | -0.02204 |
| C  | -0.79121 | 1.36421  | -0.35602 |
| C  | -1.85814 | 1.34118  | -1.27264 |

|   |          |          |          |
|---|----------|----------|----------|
| C | -0.95875 | 2.06633  | 0.85345  |
| C | -3.05210 | 1.99325  | -0.98633 |
| H | -1.74375 | 0.81207  | -2.21184 |
| C | -2.15081 | 2.72900  | 1.12983  |
| H | -0.16850 | 2.06522  | 1.59824  |
| C | -3.20442 | 2.69186  | 0.21363  |
| H | -3.86803 | 1.95477  | -1.70162 |
| H | -2.26354 | 3.26046  | 2.07021  |
| H | -4.13765 | 3.20141  | 0.43428  |
| C | 4.94794  | -0.82271 | -0.67116 |
| H | 5.97805  | -0.71950 | -0.31464 |
| H | 4.59772  | -1.82896 | -0.41809 |
| H | 4.95477  | -0.72518 | -1.76202 |
| C | 4.10020  | 0.08139  | 1.51246  |
| H | 5.13067  | 0.17655  | 1.87255  |
| H | 3.49847  | 0.84215  | 2.02228  |
| H | 3.71674  | -0.90132 | 1.80300  |
| C | 4.59882  | 1.65040  | -0.39962 |
| H | 5.62980  | 1.76462  | -0.04649 |
| H | 4.58805  | 1.79057  | -1.48574 |
| H | 4.00144  | 2.45068  | 0.05130  |

2Ph-5tBu-endoCl\_C4-carbanion\_cyclopropanation-intermediate

45

|    |          |          |          |
|----|----------|----------|----------|
| Cl | 0.91341  | 0.15330  | 2.02792  |
| C  | 1.68674  | 0.28448  | 0.37489  |
| C  | 2.65437  | -0.72403 | 0.05957  |
| C  | 3.01045  | -1.01353 | -1.29387 |
| C  | 4.06025  | -1.87047 | -1.60770 |
| C  | 4.79644  | -2.51418 | -0.60844 |
| C  | 4.44340  | -2.27508 | 0.72603  |
| C  | 3.40255  | -1.41783 | 1.05645  |
| C  | -0.27174 | -0.52641 | -0.87968 |
| H  | 0.08957  | -1.50346 | -1.16331 |
| C  | -1.52358 | -0.21383 | -0.46329 |
| C  | -2.72709 | -1.01136 | -0.25431 |
| C  | -2.61105 | -2.39875 | -0.04974 |
| C  | -3.74476 | -3.18519 | 0.12885  |
| C  | -5.01656 | -2.60441 | 0.11873  |
| C  | -5.14250 | -1.22843 | -0.07956 |
| C  | -4.01060 | -0.43754 | -0.26939 |
| N  | -1.51172 | 1.18892  | -0.18675 |
| H  | -2.33494 | 1.70450  | 0.10551  |
| C  | -0.32840 | 1.73992  | -0.29818 |

|   |          |          |          |
|---|----------|----------|----------|
| C | -0.06432 | 3.21005  | -0.15490 |
| C | 1.01751  | 3.43651  | 0.92558  |
| C | 0.47017  | 3.71546  | -1.52028 |
| C | -1.34312 | 3.98027  | 0.21157  |
| C | 0.63699  | 0.65566  | -0.69464 |
| H | 1.18484  | 0.94556  | -1.59871 |
| H | 2.45521  | -0.56280 | -2.11008 |
| H | 4.29247  | -2.05208 | -2.65507 |
| H | 5.60673  | -3.19200 | -0.85975 |
| H | 4.98595  | -2.77413 | 1.52650  |
| H | 3.15498  | -1.26053 | 2.10053  |
| H | -1.62500 | -2.85125 | -0.01363 |
| H | -3.63519 | -4.25380 | 0.28877  |
| H | -5.89967 | -3.21876 | 0.26534  |
| H | -6.12528 | -0.76673 | -0.09490 |
| H | -4.13945 | 0.62501  | -0.45556 |
| H | 1.88848  | 2.80025  | 0.74376  |
| H | 0.62792  | 3.20131  | 1.91932  |
| H | 1.32157  | 4.48781  | 0.90454  |
| H | 1.42722  | 3.24885  | -1.77024 |
| H | 0.62422  | 4.79735  | -1.45900 |
| H | -0.24080 | 3.51324  | -2.32796 |
| H | -1.75805 | 3.64292  | 1.16842  |
| H | -2.11293 | 3.88998  | -0.56384 |
| H | -1.10462 | 5.04245  | 0.31570  |

2Ph-5tBu-endoCl\_C45-cyclopropane

45

|   |          |          |          |
|---|----------|----------|----------|
| C | -1.08440 | -0.57112 | 1.49089  |
| C | -1.82126 | -0.06417 | 0.47330  |
| N | -1.01776 | 0.64536  | -0.43662 |
| H | -1.40928 | 1.50683  | -0.79657 |
| H | -1.44527 | -1.22752 | 2.27059  |
| C | 0.33841  | 0.72833  | 0.07260  |
| C | 0.33361  | -0.19284 | 1.31415  |
| H | 0.96048  | -0.00816 | 2.18222  |
| C | 1.06896  | -0.60854 | 0.04330  |
| C | 2.55753  | -0.75238 | 0.03180  |
| C | 3.25854  | -1.11359 | 1.18573  |
| C | 3.26923  | -0.55993 | -1.16209 |
| C | 4.64898  | -1.24263 | 1.16040  |
| H | 2.71942  | -1.28941 | 2.11090  |
| C | 4.65492  | -0.69010 | -1.19066 |
| H | 2.72743  | -0.30705 | -2.06827 |



|    |          |          |          |
|----|----------|----------|----------|
| C  | 5.35143  | -1.02510 | -0.02471 |
| H  | 5.18022  | -1.51662 | 2.06727  |
| H  | 5.19325  | -0.52866 | -2.12008 |
| H  | 6.43296  | -1.12208 | -0.04452 |
| Cl | 0.33667  | -1.93059 | -0.97825 |
| C  | 0.97142  | 2.13071  | -0.01051 |
| C  | -3.25155 | -0.22705 | 0.19504  |
| C  | -3.74863 | -0.07048 | -1.10929 |
| C  | -4.15319 | -0.53194 | 1.22957  |
| C  | -5.11067 | -0.21768 | -1.37187 |
| H  | -3.05866 | 0.14438  | -1.91897 |
| C  | -5.51076 | -0.68454 | 0.96359  |
| H  | -3.78463 | -0.63163 | 2.24599  |
| C  | -5.99649 | -0.52629 | -0.33851 |
| H  | -5.47797 | -0.09680 | -2.38699 |
| H  | -6.19442 | -0.91823 | 1.77474  |
| H  | -7.05696 | -0.64083 | -0.54302 |
| C  | 2.33639  | 2.23422  | 0.69515  |
| H  | 2.28823  | 1.86624  | 1.72517  |
| H  | 3.12256  | 1.69030  | 0.17276  |
| H  | 2.62883  | 3.28911  | 0.73395  |
| C  | 0.02373  | 3.12060  | 0.70560  |
| H  | 0.46996  | 4.12047  | 0.70837  |
| H  | -0.95452 | 3.20429  | 0.22246  |
| H  | -0.13908 | 2.81541  | 1.74506  |
| C  | 1.13768  | 2.53503  | -1.48782 |
| H  | 0.18597  | 2.51417  | -2.03048 |
| H  | 1.53663  | 3.55312  | -1.55822 |
| H  | 1.83240  | 1.86209  | -1.99978 |

2Ph-5tBu-endoCl\_C4attack\_C45-cyclopropanation\_TS

45

|   |          |          |          |
|---|----------|----------|----------|
| C | 1.08852  | -0.41007 | -1.58394 |
| C | 1.89624  | 0.14114  | -0.63087 |
| N | 1.10889  | 1.05897  | 0.08528  |
| H | 1.46832  | 1.65626  | 0.81656  |
| H | 1.35508  | -1.21438 | -2.25356 |
| C | -0.15372 | 1.11737  | -0.39546 |
| C | -0.25769 | 0.09554  | -1.38252 |
| H | -1.02528 | 0.10423  | -2.14146 |
| C | -1.08545 | -1.55137 | -0.37645 |
| C | -2.50423 | -1.23055 | -0.11697 |
| C | -3.31862 | -1.18970 | -1.27421 |
| C | -3.14613 | -1.12924 | 1.13409  |

|    |          |          |          |
|----|----------|----------|----------|
| C  | -4.69325 | -1.01156 | -1.18779 |
| H  | -2.84549 | -1.30531 | -2.24529 |
| C  | -4.52820 | -0.96923 | 1.22172  |
| H  | -2.55423 | -1.18634 | 2.04041  |
| C  | -5.30722 | -0.89630 | 0.06543  |
| H  | -5.29170 | -0.97311 | -2.09350 |
| H  | -4.99830 | -0.89597 | 2.19856  |
| H  | -6.38288 | -0.76509 | 0.13730  |
| Cl | -0.13785 | -1.68340 | 1.19004  |
| C  | 3.29032  | -0.11489 | -0.27746 |
| C  | 3.77271  | 0.12233  | 1.02096  |
| C  | 4.17802  | -0.61967 | -1.24412 |
| C  | 5.10564  | -0.13311 | 1.34035  |
| H  | 3.10033  | 0.47916  | 1.79575  |
| C  | 5.50555  | -0.88301 | -0.91890 |
| H  | 3.82309  | -0.78913 | -2.25616 |
| C  | 5.97750  | -0.63738 | 0.37394  |
| H  | 5.45931  | 0.05379  | 2.35011  |
| H  | 6.17711  | -1.27121 | -1.67921 |
| H  | 7.01495  | -0.83759 | 0.62442  |
| C  | -1.10496 | 2.19594  | 0.07768  |
| C  | -1.41805 | 2.00856  | 1.57827  |
| H  | -0.50797 | 2.04076  | 2.18717  |
| H  | -2.07892 | 2.81301  | 1.91894  |
| H  | -1.91668 | 1.05435  | 1.75966  |
| C  | -2.41031 | 2.17807  | -0.73301 |
| H  | -3.04048 | 3.01611  | -0.41720 |
| H  | -2.21193 | 2.29137  | -1.80442 |
| H  | -2.97192 | 1.25640  | -0.58176 |
| C  | -0.42198 | 3.56972  | -0.13070 |
| H  | -0.15831 | 3.72113  | -1.18275 |
| H  | -1.11008 | 4.36669  | 0.17070  |
| H  | 0.48902  | 3.67422  | 0.46797  |

2Ph-5tBu-exoCl-C23\_ring\_opening\_TS

45

|   |          |          |          |
|---|----------|----------|----------|
| C | 1.03996  | 0.88397  | -1.80496 |
| C | 1.09529  | 1.47948  | -0.56607 |
| N | 0.00948  | 1.15119  | 0.23384  |
| H | -0.36763 | 1.87299  | 0.83530  |
| H | 1.67824  | 1.20104  | -2.62009 |
| C | -0.87452 | 0.19429  | -0.23647 |
| C | 0.04969  | -0.12067 | -1.98169 |
| H | -0.38146 | -0.37688 | -2.94391 |

|    |          |          |          |
|----|----------|----------|----------|
| C  | -0.19238 | -1.00555 | -0.80309 |
| C  | 0.96886  | -1.58586 | -0.03000 |
| C  | 2.14186  | -1.96524 | -0.68569 |
| C  | 0.86865  | -1.74748 | 1.35461  |
| C  | 3.20778  | -2.50300 | 0.03610  |
| H  | 2.21928  | -1.82256 | -1.75922 |
| C  | 1.93255  | -2.28400 | 2.07941  |
| H  | -0.04393 | -1.44705 | 1.86184  |
| C  | 3.10613  | -2.66047 | 1.42091  |
| H  | 4.11837  | -2.79429 | -0.47980 |
| H  | 1.84873  | -2.40414 | 3.15578  |
| H  | 3.93810  | -3.07318 | 1.98442  |
| Cl | -1.35984 | -2.36373 | -1.21023 |
| C  | 2.15762  | 2.40258  | -0.00509 |
| C  | -2.30012 | 0.33442  | 0.11578  |
| C  | -3.31906 | 0.23169  | -0.84370 |
| C  | -2.65589 | 0.60505  | 1.44905  |
| C  | -4.65585 | 0.37564  | -0.47682 |
| H  | -3.05281 | 0.05029  | -1.87919 |
| C  | -3.99356 | 0.76441  | 1.81032  |
| H  | -1.88300 | 0.67226  | 2.21006  |
| C  | -4.99975 | 0.64560  | 0.85005  |
| H  | -5.43030 | 0.29195  | -1.23397 |
| H  | -4.24777 | 0.97011  | 2.84618  |
| H  | -6.04169 | 0.76568  | 1.13171  |
| C  | 2.99476  | 1.61371  | 1.02844  |
| H  | 2.36240  | 1.24391  | 1.84186  |
| H  | 3.47253  | 0.74826  | 0.55793  |
| H  | 3.77441  | 2.25455  | 1.45767  |
| C  | 1.51783  | 3.62586  | 0.68565  |
| H  | 2.30069  | 4.30318  | 1.04324  |
| H  | 0.87549  | 4.18098  | -0.00691 |
| H  | 0.92129  | 3.34314  | 1.56125  |
| C  | 3.08154  | 2.89490  | -1.13011 |
| H  | 2.52312  | 3.45143  | -1.89072 |
| H  | 3.84773  | 3.55864  | -0.71594 |
| H  | 3.59070  | 2.05866  | -1.62037 |

2Ph-5tBu-exoCl-C34\_ring\_opening\_TS

45

|    |          |          |          |
|----|----------|----------|----------|
| Cl | -1.50402 | -1.87017 | 2.62690  |
| C  | -0.90396 | -0.89381 | 1.20799  |
| C  | -1.19941 | -1.56095 | -0.09389 |
| C  | -0.23462 | -2.35972 | -0.71518 |

|   |          |          |          |
|---|----------|----------|----------|
| C | -0.51623 | -2.97947 | -1.93363 |
| C | -1.76262 | -2.79893 | -2.53838 |
| C | -2.72947 | -2.00045 | -1.92077 |
| C | -2.44575 | -1.38151 | -0.70359 |
| C | 0.40441  | -0.23672 | 1.48334  |
| H | 0.92783  | -0.48943 | 2.40077  |
| C | 1.10773  | 0.35883  | 0.37398  |
| C | 2.52038  | 0.29370  | 0.10689  |
| C | 3.18170  | 1.20228  | -0.75427 |
| C | 4.54678  | 1.09591  | -0.99806 |
| C | 5.30998  | 0.10130  | -0.37722 |
| C | 4.67591  | -0.79653 | 0.48662  |
| C | 3.30549  | -0.71571 | 0.71347  |
| N | 0.25297  | 1.19219  | -0.29851 |
| H | 0.52900  | 1.63973  | -1.16442 |
| C | -0.95054 | 1.43682  | 0.26487  |
| C | -1.82418 | 2.57601  | -0.21718 |
| C | -1.05360 | 3.91486  | -0.15163 |
| C | -2.25798 | 2.30924  | -1.67794 |
| C | -3.08100 | 2.67855  | 0.66237  |
| C | -1.13224 | 0.57769  | 1.40349  |
| H | -1.73430 | 0.88468  | 2.25157  |
| H | 0.73638  | -2.48593 | -0.24630 |
| H | 0.23645  | -3.59977 | -2.41169 |
| H | -1.98018 | -3.27840 | -3.48855 |
| H | -3.70001 | -1.85921 | -2.38755 |
| H | -3.19013 | -0.75725 | -0.21778 |
| H | 2.63126  | 2.01630  | -1.21841 |
| H | 5.02344  | 1.80837  | -1.66629 |
| H | 6.37668  | 0.02685  | -0.56574 |
| H | 5.25033  | -1.58046 | 0.97335  |
| H | 2.82263  | -1.44834 | 1.35340  |
| H | -0.15587 | 3.89436  | -0.77970 |
| H | -0.74200 | 4.13332  | 0.87539  |
| H | -1.68653 | 4.73776  | -0.50329 |
| H | -1.39559 | 2.25294  | -2.35247 |
| H | -2.90339 | 3.12086  | -2.03332 |
| H | -2.80681 | 1.36589  | -1.75618 |
| H | -2.82519 | 2.91003  | 1.70196  |
| H | -3.65488 | 1.74580  | 0.64943  |
| H | -3.72629 | 3.48109  | 0.29034  |

2Ph-5tBu-exoCl-C45\_ring\_opening\_TS

|    |          |          |          |
|----|----------|----------|----------|
| C  | -0.46575 | -0.42314 | -1.86662 |
| C  | -1.06344 | -0.67958 | -0.65153 |
| N  | -0.14272 | -1.03045 | 0.33111  |
| H  | -0.43938 | -1.73164 | 0.99624  |
| H  | -1.02991 | -0.34551 | -2.78829 |
| C  | 1.20693  | -0.94408 | 0.02780  |
| C  | 0.94731  | -0.31127 | -1.83086 |
| H  | 1.58601  | -0.49409 | -2.68802 |
| C  | 1.52498  | 0.36190  | -0.62268 |
| C  | 0.87986  | 1.61420  | -0.07317 |
| C  | 0.38506  | 2.59016  | -0.94167 |
| C  | 0.80210  | 1.81718  | 1.30706  |
| C  | -0.18001 | 3.76068  | -0.43650 |
| H  | 0.43719  | 2.42166  | -2.01313 |
| C  | 0.23475  | 2.98588  | 1.81587  |
| H  | 1.18096  | 1.05523  | 1.98136  |
| C  | -0.25838 | 3.95999  | 0.94454  |
| H  | -0.56383 | 4.51422  | -1.11840 |
| H  | 0.17526  | 3.13470  | 2.89029  |
| H  | -0.70377 | 4.86875  | 1.33929  |
| Cl | 3.31002  | 0.73794  | -0.88202 |
| C  | 2.15846  | -1.99779 | 0.60872  |
| C  | -2.48504 | -0.69418 | -0.31102 |
| C  | -2.90185 | -0.55609 | 1.02582  |
| C  | -3.47129 | -0.85704 | -1.30284 |
| C  | -4.25551 | -0.59615 | 1.36036  |
| H  | -2.16133 | -0.38276 | 1.80073  |
| C  | -4.82065 | -0.88737 | -0.96603 |
| H  | -3.17478 | -0.97650 | -2.34034 |
| C  | -5.22241 | -0.76142 | 0.36830  |
| H  | -4.55321 | -0.48440 | 2.39923  |
| H  | -5.56411 | -1.01790 | -1.74746 |
| H  | -6.27665 | -0.78724 | 0.62761  |
| C  | 3.00613  | -1.39405 | 1.75174  |
| H  | 2.36104  | -1.02511 | 2.55723  |
| H  | 3.66215  | -2.16428 | 2.17362  |
| H  | 3.62928  | -0.56832 | 1.40483  |
| C  | 1.36004  | -3.18414 | 1.19157  |
| H  | 0.76762  | -2.90109 | 2.07019  |
| H  | 0.69780  | -3.63775 | 0.44665  |
| H  | 2.06438  | -3.95249 | 1.52441  |
| C  | 3.07388  | -2.57884 | -0.49177 |
| H  | 2.47261  | -3.05034 | -1.27552 |
| H  | 3.70063  | -1.81604 | -0.95341 |
| H  | 3.72960  | -3.34004 | -0.05316 |

## 2Ph-5tBu-exoCl\_C23-cyclopropane

45

|    |          |          |          |
|----|----------|----------|----------|
| C  | 0.86960  | 0.97798  | -1.67765 |
| C  | 1.00542  | 1.53647  | -0.45465 |
| N  | 0.01371  | 1.07674  | 0.44040  |
| H  | -0.45835 | 1.78923  | 0.98747  |
| H  | 1.54305  | 1.11284  | -2.51161 |
| C  | -0.88703 | 0.19458  | -0.28445 |
| C  | -0.29074 | 0.05370  | -1.69503 |
| H  | -0.89992 | -0.07976 | -2.58507 |
| C  | -0.23145 | -1.10844 | -0.71168 |
| C  | 1.03418  | -1.59693 | -0.09892 |
| C  | 2.15799  | -1.85088 | -0.89203 |
| C  | 1.10794  | -1.80303 | 1.28265  |
| C  | 3.34242  | -2.30469 | -0.31185 |
| H  | 2.10043  | -1.68220 | -1.96303 |
| C  | 2.29012  | -2.25812 | 1.86587  |
| H  | 0.23655  | -1.59937 | 1.89742  |
| C  | 3.41074  | -2.50637 | 1.06940  |
| H  | 4.21067  | -2.49952 | -0.93492 |
| H  | 2.33932  | -2.41396 | 2.93977  |
| H  | 4.33382  | -2.85630 | 1.52289  |
| Cl | -1.39262 | -2.45642 | -1.07711 |
| C  | 2.10054  | 2.43543  | 0.07358  |
| C  | -2.32759 | 0.29925  | 0.07748  |
| C  | -3.29517 | 0.66643  | -0.86219 |
| C  | -2.71848 | 0.05262  | 1.40108  |
| C  | -4.63583 | 0.77662  | -0.48958 |
| H  | -2.99642 | 0.86530  | -1.88665 |
| C  | -4.05610 | 0.17006  | 1.77637  |
| H  | -1.97024 | -0.23470 | 2.13470  |
| C  | -5.01902 | 0.53010  | 0.83005  |
| H  | -5.37912 | 1.05978  | -1.22928 |
| H  | -4.34758 | -0.02492 | 2.80439  |
| H  | -6.06197 | 0.61761  | 1.12039  |
| C  | 2.94236  | 1.63280  | 1.09102  |
| H  | 2.32349  | 1.28986  | 1.92479  |
| H  | 3.38293  | 0.74963  | 0.61716  |
| H  | 3.75033  | 2.25860  | 1.48824  |
| C  | 3.00456  | 2.90793  | -1.07501 |
| H  | 2.43319  | 3.45680  | -1.83146 |
| H  | 3.78400  | 3.57207  | -0.68650 |
| H  | 3.49669  | 2.06091  | -1.56458 |
| C  | 1.48574  | 3.66650  | 0.77295  |

|   |         |         |         |
|---|---------|---------|---------|
| H | 2.28165 | 4.32895 | 1.13038 |
| H | 0.85076 | 4.23575 | 0.08485 |
| H | 0.88411 | 3.38354 | 1.64417 |

2Ph-5tBu-exoCl\_C3-carbanion\_cyclopropanation-intermediate

45

|    |          |          |          |
|----|----------|----------|----------|
| Cl | -0.79515 | -2.29327 | -2.56836 |
| C  | -0.69221 | -1.20538 | -1.13971 |
| C  | -0.91477 | -1.77099 | 0.13880  |
| C  | -0.45882 | -1.13622 | 1.33782  |
| C  | -0.87828 | -1.56652 | 2.59354  |
| C  | -1.71206 | -2.67661 | 2.74016  |
| C  | -2.10420 | -3.36825 | 1.58182  |
| C  | -1.71343 | -2.94562 | 0.32295  |
| C  | 0.21695  | -0.01755 | -1.45556 |
| H  | -0.00036 | 0.30574  | -2.48667 |
| C  | 0.07078  | 1.16342  | -0.51969 |
| C  | -1.13130 | 1.89768  | -0.29307 |
| C  | -1.23615 | 2.91121  | 0.69092  |
| C  | -2.44827 | 3.53956  | 0.92025  |
| C  | -3.58681 | 3.17454  | 0.18315  |
| C  | -3.49722 | 2.17937  | -0.78964 |
| C  | -2.28064 | 1.54923  | -1.04254 |
| N  | 1.27614  | 1.40809  | 0.00105  |
| H  | 1.46682  | 2.16561  | 0.64517  |
| C  | 2.24656  | 0.44499  | -0.36917 |
| C  | 3.60906  | 0.46496  | 0.27870  |
| C  | 4.29030  | 1.82822  | 0.03132  |
| C  | 3.45402  | 0.22587  | 1.79804  |
| C  | 4.47256  | -0.65324 | -0.32553 |
| C  | 1.67226  | -0.37754 | -1.27534 |
| H  | 2.13138  | -1.22833 | -1.75497 |
| H  | 0.26508  | -0.33812 | 1.28798  |
| H  | -0.51189 | -1.04242 | 3.47384  |
| H  | -2.02055 | -3.01818 | 3.72361  |
| H  | -2.72614 | -4.25666 | 1.66861  |
| H  | -2.04232 | -3.49804 | -0.55043 |
| H  | -0.37350 | 3.18811  | 1.28980  |
| H  | -2.51784 | 4.31317  | 1.67869  |
| H  | -4.53321 | 3.67371  | 0.36712  |
| H  | -4.37449 | 1.90094  | -1.36567 |
| H  | -2.20737 | 0.78834  | -1.80926 |
| H  | 3.72132  | 2.65883  | 0.46470  |
| H  | 4.40614  | 2.01820  | -1.04073 |

|   |         |          |          |
|---|---------|----------|----------|
| H | 5.28324 | 1.83542  | 0.49322  |
| H | 2.86628 | 1.01671  | 2.27779  |
| H | 4.43925 | 0.20813  | 2.27665  |
| H | 2.95598 | -0.72997 | 1.99070  |
| H | 4.59888 | -0.51688 | -1.40472 |
| H | 4.02369 | -1.63678 | -0.15210 |
| H | 5.46410 | -0.64528 | 0.13814  |

2Ph-5tBu-exoCl\_C34-cyclopropanation\_step1\_C3attack\_TS

45

|    |          |          |          |
|----|----------|----------|----------|
| Cl | 0.81691  | -2.96829 | -1.89335 |
| C  | -0.20169 | -2.01627 | -0.65079 |
| C  | 0.62554  | -1.69380 | 0.53265  |
| C  | -0.11314 | -1.21364 | 1.63677  |
| C  | 0.50196  | -0.94779 | 2.85699  |
| C  | 1.87447  | -1.16316 | 3.00821  |
| C  | 2.62587  | -1.63127 | 1.92546  |
| C  | 2.01228  | -1.88100 | 0.70125  |
| C  | -0.39875 | -0.18918 | -1.71924 |
| H  | -0.91387 | -0.68251 | -2.52967 |
| C  | -1.06721 | 0.62657  | -0.76336 |
| C  | -2.44735 | 0.58951  | -0.32091 |
| C  | -3.02787 | 1.66162  | 0.38409  |
| C  | -4.34877 | 1.58820  | 0.81515  |
| C  | -5.11360 | 0.44785  | 0.55080  |
| C  | -4.54594 | -0.62090 | -0.14745 |
| C  | -3.22509 | -0.55525 | -0.58362 |
| N  | -0.12543 | 1.43384  | -0.21549 |
| H  | -0.27992 | 2.00262  | 0.60572  |
| C  | 1.12726  | 1.24795  | -0.80791 |
| C  | 2.32730  | 2.05710  | -0.37661 |
| C  | 2.22784  | 3.47485  | -0.98479 |
| C  | 2.38337  | 2.16400  | 1.16131  |
| C  | 3.60782  | 1.37088  | -0.88006 |
| C  | 0.96124  | 0.29649  | -1.77931 |
| H  | 1.73495  | -0.09938 | -2.41855 |
| H  | -1.18361 | -1.07697 | 1.52253  |
| H  | -0.08909 | -0.58477 | 3.69282  |
| H  | 2.35606  | -0.96712 | 3.96188  |
| H  | 3.69454  | -1.79281 | 2.03584  |
| H  | 2.60365  | -2.23317 | -0.13612 |
| H  | -2.45636 | 2.56627  | 0.57066  |
| H  | -4.78569 | 2.42533  | 1.35134  |
| H  | -6.14532 | 0.39511  | 0.88543  |



|   |          |          |          |
|---|----------|----------|----------|
| H | -5.13328 | -1.51219 | -0.34830 |
| H | -2.76091 | -1.39878 | -1.08180 |
| H | 1.31503  | 3.98384  | -0.65570 |
| H | 2.21601  | 3.42842  | -2.07884 |
| H | 3.08594  | 4.08128  | -0.67283 |
| H | 1.53311  | 2.72646  | 1.56571  |
| H | 3.29073  | 2.70023  | 1.45967  |
| H | 2.39495  | 1.17478  | 1.62648  |
| H | 3.61697  | 1.29533  | -1.97254 |
| H | 3.69886  | 0.36278  | -0.46326 |
| H | 4.48460  | 1.95274  | -0.57684 |

2Ph-5tBu-exoCl\_C34-cyclopropanation\_step1\_C4attack\_TS

45

|    |          |          |          |
|----|----------|----------|----------|
| Cl | -1.66678 | 2.98806  | -1.53240 |
| C  | -1.65723 | 1.76613  | -0.10774 |
| C  | -0.36558 | 1.84500  | 0.61099  |
| C  | 0.72627  | 2.69297  | 0.32808  |
| C  | 1.85861  | 2.70018  | 1.13548  |
| C  | 1.94664  | 1.84982  | 2.24257  |
| C  | 0.87501  | 1.00963  | 2.54823  |
| C  | -0.26605 | 1.01500  | 1.74979  |
| C  | -0.20969 | 0.04587  | -1.63305 |
| H  | 0.21764  | 0.73113  | -2.34963 |
| C  | 0.48693  | -0.83315 | -0.84684 |
| C  | 1.91577  | -1.09237 | -0.70174 |
| C  | 2.39690  | -2.32855 | -0.23621 |
| C  | 3.76590  | -2.55052 | -0.09719 |
| C  | 4.67960  | -1.54889 | -0.43154 |
| C  | 4.21131  | -0.31850 | -0.90103 |
| C  | 2.84436  | -0.08782 | -1.02783 |
| N  | -0.46904 | -1.49299 | -0.05213 |
| H  | -0.23488 | -2.18386 | 0.64859  |
| C  | -1.71396 | -1.04976 | -0.28299 |
| C  | -2.95207 | -1.64857 | 0.34207  |
| C  | -3.94274 | -1.98104 | -0.79807 |
| C  | -2.61871 | -2.93789 | 1.11191  |
| C  | -3.61257 | -0.63245 | 1.30136  |
| C  | -1.59655 | 0.02957  | -1.21648 |
| H  | -2.42313 | 0.32923  | -1.84282 |
| H  | 0.68275  | 3.34082  | -0.53961 |
| H  | 2.68583  | 3.36206  | 0.89362  |
| H  | 2.83839  | 1.84915  | 2.86262  |
| H  | 0.92388  | 0.35316  | 3.41246  |

|   |          |          |          |
|---|----------|----------|----------|
| H | -1.10444 | 0.38011  | 2.00773  |
| H | 1.70373  | -3.13216 | -0.00269 |
| H | 4.11850  | -3.51224 | 0.26407  |
| H | 5.74597  | -1.72377 | -0.32429 |
| H | 4.91345  | 0.47084  | -1.15386 |
| H | 2.48340  | 0.88294  | -1.34944 |
| H | -3.49461 | -2.66758 | -1.52403 |
| H | -4.25751 | -1.07652 | -1.32732 |
| H | -4.83594 | -2.45627 | -0.37858 |
| H | -2.16995 | -3.69601 | 0.46023  |
| H | -3.53815 | -3.35782 | 1.53099  |
| H | -1.93961 | -2.74673 | 1.95146  |
| H | -3.68978 | 0.35525  | 0.83962  |
| H | -3.02886 | -0.52609 | 2.22171  |
| H | -4.61087 | -0.98956 | 1.57631  |

2Ph-5tBu-exoCl\_C34-cyclopropanation\_step2formingC3bond\_TS

45

|    |          |          |          |
|----|----------|----------|----------|
| Cl | -1.84980 | -1.41333 | 2.65471  |
| C  | -1.35212 | -0.66642 | 1.11324  |
| C  | -1.57995 | -1.38379 | -0.09970 |
| C  | -2.31780 | -2.60428 | -0.11735 |
| C  | -2.60763 | -3.26438 | -1.30147 |
| C  | -2.17372 | -2.76442 | -2.53731 |
| C  | -1.42457 | -1.58933 | -2.54527 |
| C  | -1.11253 | -0.91856 | -1.36315 |
| C  | 0.51281  | 0.09694  | 1.57004  |
| H  | 0.77026  | -0.49907 | 2.43091  |
| C  | 1.37778  | 0.51031  | 0.55659  |
| C  | 2.71801  | 0.07425  | 0.21664  |
| C  | 3.57159  | 0.82977  | -0.61351 |
| C  | 4.85653  | 0.38294  | -0.91045 |
| C  | 5.33229  | -0.81893 | -0.37955 |
| C  | 4.49890  | -1.57309 | 0.45182  |
| C  | 3.20899  | -1.13955 | 0.74183  |
| N  | 0.68512  | 1.47402  | -0.17365 |
| H  | 1.08822  | 1.95140  | -0.97248 |
| C  | -0.58391 | 1.64084  | 0.18651  |
| C  | -1.50176 | 2.70758  | -0.33371 |
| C  | -1.54217 | 3.87001  | 0.69151  |
| C  | -1.01859 | 3.24040  | -1.69314 |
| C  | -2.91675 | 2.10944  | -0.48278 |
| C  | -0.83515 | 0.73811  | 1.35862  |
| H  | -1.34699 | 1.23530  | 2.19061  |

|   |          |          |          |
|---|----------|----------|----------|
| H | -2.67863 | -3.01678 | 0.81714  |
| H | -3.18442 | -4.18537 | -1.26101 |
| H | -2.40168 | -3.28792 | -3.46084 |
| H | -1.05041 | -1.18809 | -3.48423 |
| H | -0.48357 | -0.04802 | -1.42709 |
| H | 3.24533  | 1.78504  | -1.01651 |
| H | 5.49301  | 0.98389  | -1.55398 |
| H | 6.33598  | -1.16256 | -0.61061 |
| H | 4.85142  | -2.51300 | 0.86768  |
| H | 2.56094  | -1.74958 | 1.36359  |
| H | -0.55111 | 4.31922  | 0.81208  |
| H | -1.88752 | 3.52474  | 1.67140  |
| H | -2.23450 | 4.64393  | 0.34231  |
| H | -0.04507 | 3.73908  | -1.61711 |
| H | -1.73069 | 3.98087  | -2.06944 |
| H | -0.94684 | 2.43501  | -2.43282 |
| H | -3.27847 | 1.70140  | 0.46678  |
| H | -2.92190 | 1.30266  | -1.22168 |
| H | -3.61400 | 2.88951  | -0.80569 |

2Ph-5tBu-exoCl\_C34-cyclopropanation\_step2formingC4bond\_TS

45

|    |          |          |          |
|----|----------|----------|----------|
| Cl | -1.34165 | -1.83574 | 2.63214  |
| C  | -0.65877 | -1.11569 | 1.15022  |
| C  | -1.00631 | -1.70557 | -0.10971 |
| C  | -0.48720 | -1.22528 | -1.34505 |
| C  | -0.79652 | -1.84920 | -2.55152 |
| C  | -1.65215 | -2.94936 | -2.60094 |
| C  | -2.19142 | -3.42608 | -1.39960 |
| C  | -1.88453 | -2.82391 | -0.18832 |
| C  | 0.26339  | 0.03527  | 1.50343  |
| H  | 0.78191  | -0.11512 | 2.45469  |
| C  | 1.09718  | 0.67418  | 0.43860  |
| C  | 2.48084  | 0.43758  | 0.17498  |
| C  | 3.24603  | 1.23407  | -0.71293 |
| C  | 4.57779  | 0.93412  | -0.96618 |
| C  | 5.19726  | -0.15543 | -0.34082 |
| C  | 4.45772  | -0.94602 | 0.54360  |
| C  | 3.12072  | -0.66147 | 0.79908  |
| N  | 0.32164  | 1.61517  | -0.15305 |
| H  | 0.62951  | 2.15410  | -0.95379 |
| C  | -0.94098 | 1.73146  | 0.37139  |
| C  | -1.98724 | 2.62263  | -0.25428 |
| C  | -1.43341 | 4.05087  | -0.44278 |

|   |          |          |          |
|---|----------|----------|----------|
| C | -2.40290 | 2.04391  | -1.62739 |
| C | -3.22006 | 2.67500  | 0.66316  |
| C | -1.01551 | 0.85110  | 1.44787  |
| H | -1.80059 | 0.80737  | 2.18390  |
| H | 0.17677  | -0.37828 | -1.36296 |
| H | -0.36582 | -1.45288 | -3.46777 |
| H | -1.90100 | -3.41977 | -3.54738 |
| H | -2.86402 | -4.28017 | -1.40664 |
| H | -2.31845 | -3.22173 | 0.72069  |
| H | 2.80077  | 2.09988  | -1.19530 |
| H | 5.14340  | 1.56063  | -1.65028 |
| H | 6.24055  | -0.38066 | -0.53923 |
| H | 4.92499  | -1.79535 | 1.03427  |
| H | 2.55304  | -1.29779 | 1.47055  |
| H | -0.56619 | 4.07188  | -1.11337 |
| H | -1.13160 | 4.48376  | 0.51666  |
| H | -2.20150 | 4.69378  | -0.88612 |
| H | -1.55588 | 2.01642  | -2.32191 |
| H | -3.18877 | 2.66271  | -2.07619 |
| H | -2.77985 | 1.02219  | -1.51889 |
| H | -2.96444 | 3.07666  | 1.64971  |
| H | -3.65560 | 1.67938  | 0.79806  |
| H | -3.98413 | 3.32136  | 0.21950  |

2Ph-5tBu-exoCl\_C34-cyclopropane

45

|    |          |          |          |
|----|----------|----------|----------|
| Cl | -1.33342 | -2.05342 | 2.58765  |
| C  | -0.81450 | -0.97936 | 1.22042  |
| C  | -0.91066 | -1.63213 | -0.11264 |
| C  | 0.20998  | -2.24915 | -0.67966 |
| C  | 0.11849  | -2.85479 | -1.93353 |
| C  | -1.09287 | -2.84166 | -2.62990 |
| C  | -2.21445 | -2.22493 | -2.06903 |
| C  | -2.12051 | -1.61936 | -0.81571 |
| C  | 0.31112  | -0.04833 | 1.57733  |
| H  | 0.80569  | -0.19244 | 2.53386  |
| C  | 1.01591  | 0.60131  | 0.46582  |
| C  | 2.41711  | 0.59144  | 0.18271  |
| C  | 3.01868  | 1.43917  | -0.78276 |
| C  | 4.38401  | 1.38399  | -1.03597 |
| C  | 5.21184  | 0.50141  | -0.33209 |
| C  | 4.63821  | -0.33517 | 0.63045  |
| C  | 3.26998  | -0.30345 | 0.87815  |
| N  | 0.08493  | 1.32288  | -0.22955 |

|   |          |          |          |
|---|----------|----------|----------|
| H | 0.32545  | 1.80803  | -1.08668 |
| C | -1.16535 | 1.34843  | 0.26284  |
| C | -2.22213 | 2.29612  | -0.25533 |
| C | -1.83875 | 3.75776  | 0.08111  |
| C | -2.35781 | 2.14465  | -1.78754 |
| C | -3.57653 | 1.97159  | 0.39781  |
| C | -1.19373 | 0.47225  | 1.43551  |
| H | -1.83600 | 0.69448  | 2.28061  |
| H | 1.15162  | -2.24543 | -0.13959 |
| H | 0.99119  | -3.33414 | -2.36759 |
| H | -1.16283 | -3.31068 | -3.60725 |
| H | -3.15822 | -2.21483 | -2.60657 |
| H | -2.98738 | -1.13887 | -0.37231 |
| H | 2.41663  | 2.16123  | -1.32875 |
| H | 4.81025  | 2.04706  | -1.78460 |
| H | 6.27842  | 0.46618  | -0.53198 |
| H | 5.26137  | -1.03203 | 1.18539  |
| H | 2.84144  | -0.98421 | 1.60786  |
| H | -0.88085 | 4.03059  | -0.37549 |
| H | -1.74940 | 3.89592  | 1.16406  |
| H | -2.60200 | 4.45066  | -0.29262 |
| H | -1.43199 | 2.41467  | -2.30948 |
| H | -3.14526 | 2.80869  | -2.16119 |
| H | -2.61081 | 1.11441  | -2.05658 |
| H | -3.54140 | 2.10622  | 1.48392  |
| H | -3.88371 | 0.94133  | 0.19043  |
| H | -4.34689 | 2.64244  | 0.00333  |

2Ph-5tBu-exoCl\_C4-carbanion\_cyclopropanation-intermediate

45

|    |          |          |          |
|----|----------|----------|----------|
| Cl | -2.79108 | -0.22498 | 2.51914  |
| C  | -1.99988 | 0.00316  | 0.87519  |
| C  | -2.10618 | -1.11738 | -0.00951 |
| C  | -3.14311 | -2.09355 | 0.07460  |
| C  | -3.30204 | -3.08309 | -0.88850 |
| C  | -2.44162 | -3.17960 | -1.98886 |
| C  | -1.39914 | -2.25075 | -2.08396 |
| C  | -1.22300 | -1.26167 | -1.12391 |
| C  | 0.56124  | -0.12610 | 1.35397  |
| H  | 0.58797  | -0.91612 | 2.09015  |
| C  | 1.56861  | 0.24712  | 0.54079  |
| C  | 2.92859  | -0.24962 | 0.34195  |
| C  | 3.96281  | 0.59377  | -0.09613 |
| C  | 5.25303  | 0.09480  | -0.26874 |

|   |          |          |          |
|---|----------|----------|----------|
| C | 5.52973  | -1.24670 | -0.00062 |
| C | 4.50636  | -2.09088 | 0.44048  |
| C | 3.21470  | -1.60013 | 0.60592  |
| N | 1.07298  | 1.34506  | -0.24570 |
| H | 1.64162  | 1.83096  | -0.93264 |
| C | -0.18787 | 1.61648  | -0.02944 |
| C | -0.95108 | 2.70410  | -0.72715 |
| C | -1.83566 | 3.42437  | 0.31456  |
| C | -0.00502 | 3.70639  | -1.40949 |
| C | -1.86490 | 2.03952  | -1.79053 |
| C | -0.66565 | 0.70747  | 1.07680  |
| H | -0.80675 | 1.39684  | 1.92688  |
| H | -3.83034 | -2.05568 | 0.91299  |
| H | -4.11411 | -3.79895 | -0.77336 |
| H | -2.56965 | -3.95757 | -2.73570 |
| H | -0.69552 | -2.30617 | -2.91257 |
| H | -0.38299 | -0.58612 | -1.23779 |
| H | 3.77554  | 1.64859  | -0.27652 |
| H | 6.04318  | 0.75875  | -0.60583 |
| H | 6.53520  | -1.63340 | -0.13581 |
| H | 4.71277  | -3.13732 | 0.64385  |
| H | 2.41485  | -2.26294 | 0.92104  |
| H | -1.22923 | 3.90023  | 1.09242  |
| H | -2.52531 | 2.71469  | 0.77920  |
| H | -2.41651 | 4.20227  | -0.19026 |
| H | 0.68476  | 4.16625  | -0.69351 |
| H | -0.60000 | 4.50347  | -1.86410 |
| H | 0.57532  | 3.24176  | -2.21525 |
| H | -2.52828 | 1.31385  | -1.31681 |
| H | -1.27232 | 1.53593  | -2.55953 |
| H | -2.46206 | 2.82376  | -2.26700 |

2Ph-5tBu-exoCl\_C45-cyclopropane

45

|   |          |          |          |
|---|----------|----------|----------|
| C | -0.37380 | -0.57368 | -1.74130 |
| C | -0.99775 | -0.79304 | -0.55812 |
| N | -0.07923 | -0.92023 | 0.49826  |
| H | -0.28884 | -1.63660 | 1.18090  |
| H | -0.85964 | -0.35435 | -2.68177 |
| C | 1.27812  | -0.90631 | -0.03345 |
| C | 1.08958  | -0.54633 | -1.52296 |
| H | 1.78533  | -0.88227 | -2.28612 |
| C | 1.61611  | 0.49027  | -0.53226 |
| C | 0.81659  | 1.67542  | -0.10307 |

|    |          |          |          |
|----|----------|----------|----------|
| C  | 0.20741  | 2.50254  | -1.05122 |
| C  | 0.69369  | 1.98194  | 1.25657  |
| C  | -0.51612 | 3.62534  | -0.64712 |
| H  | 0.30029  | 2.25956  | -2.10539 |
| C  | -0.02818 | 3.10339  | 1.66366  |
| H  | 1.16194  | 1.33347  | 1.99059  |
| C  | -0.63677 | 3.92605  | 0.71153  |
| H  | -0.98634 | 4.26261  | -1.39066 |
| H  | -0.11928 | 3.33411  | 2.72130  |
| H  | -1.20275 | 4.79775  | 1.02783  |
| Cl | 3.35743  | 0.97412  | -0.76020 |
| C  | 2.25012  | -1.94566 | 0.56472  |
| C  | -2.43339 | -0.82237 | -0.26292 |
| C  | -2.90249 | -0.50663 | 1.02300  |
| C  | -3.36479 | -1.16681 | -1.25751 |
| C  | -4.26822 | -0.53270 | 1.30504  |
| H  | -2.19253 | -0.21532 | 1.79035  |
| C  | -4.72749 | -1.18632 | -0.97444 |
| H  | -3.01124 | -1.43461 | -2.24864 |
| C  | -5.18554 | -0.87146 | 0.30906  |
| H  | -4.61543 | -0.28139 | 2.30322  |
| H  | -5.43464 | -1.45689 | -1.75335 |
| H  | -6.24891 | -0.89193 | 0.52907  |
| C  | 2.85923  | -1.38172 | 1.86224  |
| H  | 2.07239  | -1.09756 | 2.57086  |
| H  | 3.49123  | -2.13501 | 2.34654  |
| H  | 3.47151  | -0.49844 | 1.66061  |
| C  | 3.36195  | -2.33905 | -0.42644 |
| H  | 2.93634  | -2.80256 | -1.32295 |
| H  | 3.97367  | -1.49204 | -0.73502 |
| H  | 4.02017  | -3.07394 | 0.04988  |
| C  | 1.48156  | -3.24697 | 0.89101  |
| H  | 0.81012  | -3.14406 | 1.75085  |
| H  | 0.89672  | -3.59213 | 0.03153  |
| H  | 2.19928  | -4.03205 | 1.14985  |

4t\_plus-carbene

45

|   |          |          |         |
|---|----------|----------|---------|
| C | -3.81132 | -0.85034 | 0.44125 |
| C | -2.44129 | -1.03513 | 0.83438 |
| C | -2.11338 | -0.33441 | 2.02415 |
| C | -1.42007 | -1.79138 | 0.19911 |
| C | -0.83412 | -0.39036 | 2.56183 |
| H | -2.89493 | 0.25032  | 2.49705 |

|    |          |          |          |
|----|----------|----------|----------|
| C  | -0.14750 | -1.84556 | 0.73769  |
| H  | -1.64858 | -2.32547 | -0.71611 |
| C  | 0.15118  | -1.13443 | 1.91103  |
| H  | -0.59345 | 0.16142  | 3.46454  |
| H  | 0.62969  | -2.42197 | 0.24715  |
| H  | 1.16223  | -1.15472 | 2.30512  |
| Cl | -4.21232 | -1.79007 | -1.04252 |
| C  | 0.92655  | 1.32381  | 0.03009  |
| C  | 1.67182  | 1.83163  | 1.09042  |
| C  | 2.95747  | 1.23314  | 1.05012  |
| C  | 2.99033  | 0.36149  | -0.02975 |
| N  | 1.75911  | 0.44245  | -0.63764 |
| H  | 1.46997  | -0.13849 | -1.40937 |
| H  | 1.32756  | 2.56118  | 1.81016  |
| H  | 3.77397  | 1.41973  | 1.73283  |
| C  | 4.07438  | -0.55169 | -0.55318 |
| C  | -0.45329 | 1.55753  | -0.36395 |
| C  | -1.30306 | 2.32632  | 0.45820  |
| C  | -0.99747 | 1.00911  | -1.54210 |
| C  | -2.63989 | 2.51332  | 0.13023  |
| H  | -0.91105 | 2.75761  | 1.37324  |
| C  | -2.33864 | 1.19104  | -1.86286 |
| H  | -0.37473 | 0.43145  | -2.21837 |
| C  | -3.17452 | 1.92925  | -1.02190 |
| H  | -3.27575 | 3.09752  | 0.78934  |
| H  | -2.73738 | 0.74022  | -2.76653 |
| H  | -4.22287 | 2.06185  | -1.26954 |
| C  | 5.31682  | -0.44412 | 0.34513  |
| H  | 6.10546  | -1.10583 | -0.02818 |
| H  | 5.70862  | 0.57854  | 0.35790  |
| H  | 5.08626  | -0.73582 | 1.37537  |
| C  | 4.45349  | -0.14391 | -1.99427 |
| H  | 5.24444  | -0.79855 | -2.37782 |
| H  | 3.59730  | -0.22043 | -2.67380 |
| H  | 4.81638  | 0.88906  | -2.02235 |
| C  | 3.57667  | -2.01430 | -0.55058 |
| H  | 4.36484  | -2.68366 | -0.91355 |
| H  | 3.29730  | -2.32856 | 0.46091  |
| H  | 2.70534  | -2.14744 | -1.20196 |

## 11. Coordinates for pyrroles used in the steric regioselectivity model



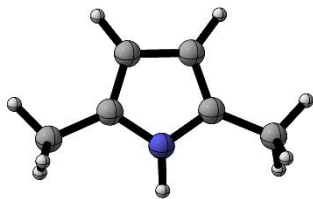

4a\_conformer-001

|   |          |          |          |
|---|----------|----------|----------|
| C | -1.13704 | 0.02342  | 0.00000  |
| C | -0.71443 | -1.29153 | 0.00000  |
| C | 0.71443  | -1.29153 | -0.00000 |
| C | 1.13704  | 0.02342  | -0.00000 |
| N | 0.00000  | 0.80657  | -0.00000 |
| H | 0.00000  | 1.81672  | 0.00000  |
| H | 1.36667  | -2.15555 | -0.00000 |
| H | -1.36667 | -2.15555 | 0.00000  |
| C | 2.50768  | 0.61927  | 0.00000  |
| H | 2.68577  | 1.24671  | -0.88344 |
| H | 2.68578  | 1.24668  | 0.88346  |
| H | 3.25818  | -0.17622 | -0.00002 |
| C | -2.50768 | 0.61927  | -0.00000 |
| H | -2.68576 | 1.24673  | 0.88343  |
| H | -2.68579 | 1.24666  | -0.88347 |
| H | -3.25818 | -0.17622 | 0.00004  |

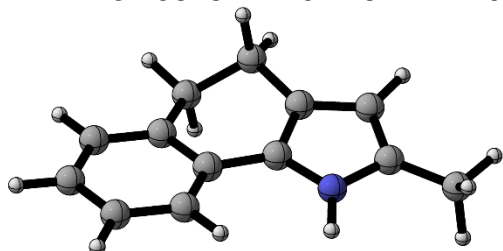

4b\_conformer-001

|   |          |          |          |
|---|----------|----------|----------|
| C | -2.85424 | -0.44143 | 0.01662  |
| C | -2.58950 | 0.90872  | -0.16817 |
| N | -1.64133 | -1.08620 | 0.12374  |
| C | -4.15000 | -1.17685 | 0.12093  |
| H | -1.53497 | -2.06976 | 0.32633  |
| H | -3.34044 | 1.67842  | -0.29369 |
| H | -4.23365 | -1.96786 | -0.63536 |
| H | -4.27548 | -1.65168 | 1.10290  |
| H | -4.98337 | -0.48427 | -0.02421 |
| C | -1.17871 | 1.08213  | -0.15204 |
| C | -0.61070 | -0.17088 | 0.03345  |
| C | 1.03525  | 2.06871  | 0.38532  |
| C | -0.29650 | 2.28003  | -0.36086 |
| H | 0.83510  | 2.16213  | 1.46410  |

|   |          |          |          |
|---|----------|----------|----------|
| H | 1.74983  | 2.85816  | 0.12918  |
| H | -0.09991 | 2.42674  | -1.43452 |
| H | -0.77582 | 3.19918  | -0.00584 |
| C | 0.81611  | -0.42976 | 0.02645  |
| C | 1.65868  | 0.70642  | 0.14046  |
| C | 3.03990  | 0.53049  | 0.09462  |
| C | 3.60515  | -0.74173 | -0.04872 |
| C | 2.77423  | -1.85808 | -0.15093 |
| C | 1.38813  | -1.70244 | -0.12029 |
| H | 3.68610  | 1.40130  | 0.17960  |
| H | 4.68479  | -0.85635 | -0.08124 |
| H | 3.20202  | -2.85020 | -0.26560 |
| H | 0.74834  | -2.57448 | -0.22897 |

4b\_conformer-002

|   |          |          |          |
|---|----------|----------|----------|
| C | 2.85424  | -0.44143 | 0.01662  |
| C | 2.58950  | 0.90872  | -0.16817 |
| N | 1.64133  | -1.08620 | 0.12374  |
| C | 4.15000  | -1.17685 | 0.12093  |
| H | 1.53497  | -2.06976 | 0.32633  |
| H | 3.34044  | 1.67842  | -0.29369 |
| H | 4.27548  | -1.65168 | 1.10290  |
| H | 4.23365  | -1.96786 | -0.63535 |
| H | 4.98337  | -0.48427 | -0.02421 |
| C | 1.17871  | 1.08213  | -0.15204 |
| C | 0.61070  | -0.17088 | 0.03345  |
| C | -1.03525 | 2.06871  | 0.38532  |
| C | 0.29650  | 2.28003  | -0.36086 |
| H | -1.74983 | 2.85816  | 0.12918  |
| H | -0.83510 | 2.16213  | 1.46410  |
| H | 0.77582  | 3.19918  | -0.00584 |
| H | 0.09991  | 2.42674  | -1.43452 |
| C | -0.81611 | -0.42976 | 0.02645  |
| C | -1.65868 | 0.70642  | 0.14046  |
| C | -3.03990 | 0.53049  | 0.09462  |
| C | -3.60515 | -0.74173 | -0.04872 |
| C | -2.77423 | -1.85808 | -0.15093 |
| C | -1.38813 | -1.70244 | -0.12029 |
| H | -3.68610 | 1.40130  | 0.17960  |
| H | -4.68479 | -0.85635 | -0.08124 |
| H | -3.20202 | -2.85020 | -0.26560 |
| H | -0.74834 | -2.57448 | -0.22897 |

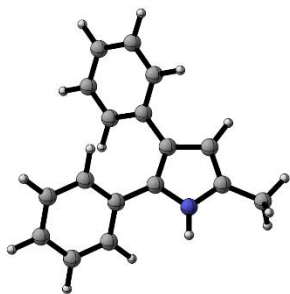

4c\_conformer-001

|   |          |          |          |
|---|----------|----------|----------|
| C | 0.39756  | 3.06233  | -0.00086 |
| C | -0.83376 | 2.43810  | -0.00080 |
| C | -0.62602 | 1.02180  | -0.00290 |
| C | 0.75664  | 0.81538  | 0.00796  |
| N | 1.34641  | 2.06647  | -0.00851 |
| H | 2.33955  | 2.22150  | 0.09424  |
| H | -1.79184 | 2.93911  | -0.04213 |
| C | 0.76653  | 4.50956  | -0.00033 |
| H | 1.35927  | 4.77997  | 0.88298  |
| H | 1.35671  | 4.78115  | -0.88467 |
| H | -0.13795 | 5.12347  | 0.00250  |
| C | 1.57838  | -0.39503 | 0.07718  |
| C | 2.81526  | -0.46181 | -0.58991 |
| C | 1.16914  | -1.50702 | 0.83626  |
| C | 3.61514  | -1.60055 | -0.50059 |
| H | 3.14106  | 0.37583  | -1.20059 |
| C | 1.96314  | -2.64816 | 0.91178  |
| H | 0.22729  | -1.46458 | 1.37218  |
| C | 3.19170  | -2.70125 | 0.24647  |
| H | 4.56562  | -1.63067 | -1.02591 |
| H | 1.62810  | -3.49543 | 1.50367  |
| H | 3.81168  | -3.59060 | 0.31123  |
| C | -1.69631 | 0.01459  | -0.07805 |
| C | -1.57437 | -1.13810 | -0.87497 |
| C | -2.89875 | 0.20859  | 0.62405  |
| C | -2.60803 | -2.06936 | -0.95031 |
| H | -0.66303 | -1.29545 | -1.44256 |
| C | -3.93741 | -0.71869 | 0.54140  |
| H | -3.00936 | 1.09050  | 1.24877  |
| C | -3.79602 | -1.86536 | -0.24279 |
| H | -2.49021 | -2.95229 | -1.57282 |
| H | -4.85595 | -0.54771 | 1.09635  |
| H | -4.60268 | -2.59017 | -0.30524 |

4c\_conformer-002

|   |          |         |          |
|---|----------|---------|----------|
| C | -0.39756 | 3.06233 | -0.00086 |
|---|----------|---------|----------|

|   |          |          |          |
|---|----------|----------|----------|
| C | 0.83376  | 2.43810  | -0.00080 |
| C | 0.62602  | 1.02180  | -0.00290 |
| C | -0.75664 | 0.81538  | 0.00796  |
| N | -1.34641 | 2.06647  | -0.00851 |
| H | -2.33955 | 2.22150  | 0.09424  |
| H | 1.79184  | 2.93911  | -0.04213 |
| C | -0.76653 | 4.50956  | -0.00033 |
| H | -1.35670 | 4.78115  | -0.88467 |
| H | -1.35928 | 4.77997  | 0.88297  |
| H | 0.13795  | 5.12347  | 0.00251  |
| C | -1.57838 | -0.39503 | 0.07718  |
| C | -1.16914 | -1.50702 | 0.83626  |
| C | -2.81526 | -0.46181 | -0.58991 |
| C | -1.96314 | -2.64816 | 0.91178  |
| H | -0.22729 | -1.46458 | 1.37218  |
| C | -3.61514 | -1.60055 | -0.50058 |
| H | -3.14106 | 0.37583  | -1.20059 |
| C | -3.19171 | -2.70125 | 0.24647  |
| H | -1.62810 | -3.49543 | 1.50367  |
| H | -4.56562 | -1.63067 | -1.02591 |
| H | -3.81168 | -3.59060 | 0.31123  |
| C | 1.69631  | 0.01459  | -0.07805 |
| C | 1.57437  | -1.13810 | -0.87497 |
| C | 2.89875  | 0.20859  | 0.62405  |
| C | 2.60803  | -2.06936 | -0.95031 |
| H | 0.66303  | -1.29545 | -1.44257 |
| C | 3.93741  | -0.71869 | 0.54140  |
| H | 3.00936  | 1.09050  | 1.24877  |
| C | 3.79602  | -1.86536 | -0.24279 |
| H | 2.49021  | -2.95229 | -1.57283 |
| H | 4.85595  | -0.54771 | 1.09635  |
| H | 4.60268  | -2.59017 | -0.30524 |

#### 4c\_conformer-003

|   |          |         |          |
|---|----------|---------|----------|
| C | -0.39730 | 3.06232 | -0.00083 |
| C | 0.83397  | 2.43800 | -0.00082 |
| C | 0.62612  | 1.02170 | -0.00294 |
| C | -0.75655 | 0.81540 | 0.00793  |
| N | -1.34623 | 2.06654 | -0.00850 |
| H | -2.33936 | 2.22163 | 0.09432  |
| H | 1.79209  | 2.93893 | -0.04215 |
| C | -0.76613 | 4.50959 | -0.00026 |
| H | -1.35626 | 4.78127 | -0.88460 |
| H | -1.35887 | 4.78003 | 0.88304  |
| H | 0.13841  | 5.12341 | 0.00263  |

|   |          |          |          |
|---|----------|----------|----------|
| C | -1.57842 | -0.39494 | 0.07712  |
| C | -1.16939 | -1.50690 | 0.83635  |
| C | -2.81524 | -0.46160 | -0.59009 |
| C | -1.96355 | -2.64792 | 0.91190  |
| H | -0.22758 | -1.46451 | 1.37235  |
| C | -3.61529 | -1.60023 | -0.50071 |
| H | -3.14085 | 0.37604  | -1.20086 |
| C | -3.19207 | -2.70090 | 0.24649  |
| H | -1.62868 | -3.49518 | 1.50391  |
| H | -4.56573 | -1.63027 | -1.02611 |
| H | -3.81217 | -3.59016 | 0.31130  |
| C | 1.69635  | 0.01443  | -0.07809 |
| C | 1.57430  | -1.13834 | -0.87486 |
| C | 2.89884  | 0.20847  | 0.62390  |
| C | 2.60790  | -2.06967 | -0.95015 |
| H | 0.66292  | -1.29573 | -1.44238 |
| C | 3.93745  | -0.71887 | 0.54131  |
| H | 3.00952  | 1.09045  | 1.24851  |
| C | 3.79595  | -1.86564 | -0.24272 |
| H | 2.49000  | -2.95267 | -1.57255 |
| H | 4.85603  | -0.54788 | 1.09618  |
| H | 4.60257  | -2.59050 | -0.30514 |

#### 4c\_conformer-004

|   |          |          |          |
|---|----------|----------|----------|
| C | -0.39764 | 3.06233  | -0.00084 |
| C | 0.83370  | 2.43814  | -0.00078 |
| C | 0.62600  | 1.02182  | -0.00294 |
| C | -0.75665 | 0.81537  | 0.00787  |
| N | -1.34646 | 2.06645  | -0.00856 |
| H | -2.33961 | 2.22144  | 0.09420  |
| H | 1.79176  | 2.93919  | -0.04207 |
| C | -0.76663 | 4.50955  | -0.00025 |
| H | -1.35680 | 4.78118  | -0.88459 |
| H | -1.35939 | 4.77992  | 0.88306  |
| H | 0.13784  | 5.12348  | 0.00263  |
| C | -1.57835 | -0.39508 | 0.07710  |
| C | -1.16911 | -1.50697 | 0.83633  |
| C | -2.81519 | -0.46195 | -0.59005 |
| C | -1.96309 | -2.64812 | 0.91193  |
| H | -0.22729 | -1.46444 | 1.37228  |
| C | -3.61505 | -1.60071 | -0.50063 |
| H | -3.14096 | 0.37562  | -1.20082 |
| C | -3.19162 | -2.70131 | 0.24657  |
| H | -1.62805 | -3.49532 | 1.50392  |
| H | -4.56551 | -1.63090 | -1.02599 |

|   |          |          |          |
|---|----------|----------|----------|
| H | -3.81158 | -3.59066 | 0.31141  |
| C | 1.69631  | 0.01463  | -0.07809 |
| C | 2.89869  | 0.20860  | 0.62411  |
| C | 1.57443  | -1.13801 | -0.87508 |
| C | 3.93736  | -0.71867 | 0.54149  |
| H | 3.00925  | 1.09048  | 1.24888  |
| C | 2.60809  | -2.06927 | -0.95039 |
| H | 0.66313  | -1.29534 | -1.44276 |
| C | 3.79603  | -1.86530 | -0.24277 |
| H | 4.85585  | -0.54773 | 1.09652  |
| H | 2.49032  | -2.95217 | -1.57297 |
| H | 4.60269  | -2.59010 | -0.30519 |

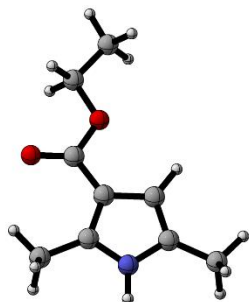

4d\_conformer-001

|   |          |          |          |
|---|----------|----------|----------|
| C | -1.49173 | 1.05056  | -0.00002 |
| C | -0.37184 | 0.21595  | 0.00001  |
| C | -0.84532 | -1.14142 | 0.00003  |
| C | -2.21714 | -1.10813 | 0.00001  |
| N | -2.58439 | 0.23072  | -0.00002 |
| C | -1.62589 | 2.53753  | -0.00002 |
| H | -0.23141 | -2.03018 | 0.00005  |
| C | -3.23500 | -2.20057 | 0.00000  |
| H | -3.53992 | 0.56147  | -0.00004 |
| H | -3.88383 | -2.15477 | 0.88391  |
| H | -3.88380 | -2.15479 | -0.88393 |
| H | -2.73519 | -3.17276 | 0.00002  |
| H | -2.17389 | 2.88804  | -0.88372 |
| H | -2.17323 | 2.88812  | 0.88406  |
| H | -0.63500 | 2.99066  | -0.00039 |
| C | 1.01716  | 0.65689  | 0.00002  |
| O | 1.41520  | 1.81698  | 0.00002  |
| O | 1.87264  | -0.39681 | 0.00001  |
| C | 3.27972  | -0.07564 | 0.00001  |
| C | 4.04201  | -1.38604 | -0.00004 |
| H | 3.50687  | 0.52841  | -0.88414 |
| H | 3.50689  | 0.52833  | 0.88421  |
| H | 5.11883  | -1.18783 | -0.00004 |
| H | 3.79995  | -1.97802 | 0.88848  |

|   |         |          |          |
|---|---------|----------|----------|
| H | 3.79994 | -1.97795 | -0.88861 |
|---|---------|----------|----------|

4d\_conformer-002

|   |          |          |          |
|---|----------|----------|----------|
| C | -1.30943 | 1.11817  | 0.04811  |
| C | -0.34213 | 0.12318  | -0.11260 |
| C | -1.02249 | -1.14330 | -0.11556 |
| C | -2.36398 | -0.90027 | 0.03941  |
| N | -2.51220 | 0.47687  | 0.13619  |
| C | -1.20554 | 2.60576  | 0.12106  |
| H | -0.56080 | -2.11428 | -0.21926 |
| C | -3.53618 | -1.82243 | 0.10992  |
| H | -3.39792 | 0.94927  | 0.25877  |
| H | -4.07390 | -1.72792 | 1.06192  |
| H | -4.25815 | -1.62845 | -0.69354 |
| H | -3.19889 | -2.85795 | 0.01579  |
| H | -1.69106 | 3.08263  | -0.74016 |
| H | -1.68988 | 2.99380  | 1.02547  |
| H | -0.15548 | 2.89627  | 0.12915  |
| C | 1.09139  | 0.34669  | -0.24453 |
| O | 1.66010  | 1.43343  | -0.24771 |
| O | 1.76471  | -0.82743 | -0.37275 |
| C | 3.20318  | -0.74278 | -0.47859 |
| C | 3.85171  | -0.64605 | 0.89324  |
| H | 3.49229  | -1.66224 | -0.99244 |
| H | 3.46390  | 0.11506  | -1.10241 |
| H | 4.94252  | -0.65397 | 0.79105  |
| H | 3.55735  | 0.28133  | 1.39240  |
| H | 3.55768  | -1.49353 | 1.52092  |

4d\_conformer-003

|   |         |          |          |
|---|---------|----------|----------|
| C | 1.30935 | 1.11818  | 0.04817  |
| C | 0.34213 | 0.12313  | -0.11270 |
| C | 1.02259 | -1.14330 | -0.11569 |
| C | 2.36405 | -0.90018 | 0.03939  |
| N | 2.51216 | 0.47696  | 0.13630  |
| C | 1.20536 | 2.60576  | 0.12122  |
| H | 0.56098 | -2.11432 | -0.21949 |
| C | 3.53631 | -1.82226 | 0.10994  |
| H | 3.39783 | 0.94942  | 0.25904  |
| H | 4.07397 | -1.72774 | 1.06196  |
| H | 3.19910 | -2.85780 | 0.01576  |
| H | 4.25830 | -1.62820 | -0.69348 |
| H | 1.68918 | 3.08267  | -0.74094 |
| H | 0.15527 | 2.89611  | 0.13118  |

|   |          |          |          |
|---|----------|----------|----------|
| H | 1.69134  | 2.99391  | 1.02469  |
| C | -1.09139 | 0.34657  | -0.24473 |
| O | -1.66012 | 1.43329  | -0.24833 |
| O | -1.76469 | -0.82762 | -0.37250 |
| C | -3.20317 | -0.74303 | -0.47840 |
| C | -3.85171 | -0.64573 | 0.89338  |
| H | -3.46388 | 0.11455  | -1.10258 |
| H | -3.49225 | -1.66271 | -0.99187 |
| H | -3.55734 | 0.28185  | 1.39217  |
| H | -4.94252 | -0.65368 | 0.79119  |
| H | -3.55770 | -1.49297 | 1.52141  |

#### 4d\_conformer-004

|   |          |          |          |
|---|----------|----------|----------|
| C | 0.81432  | 1.01364  | 0.00010  |
| C | 0.47062  | -0.34090 | 0.00005  |
| C | 1.69031  | -1.09699 | -0.00006 |
| C | 2.73724  | -0.20927 | -0.00008 |
| N | 2.17937  | 1.06185  | 0.00002  |
| C | -0.00945 | 2.26063  | 0.00018  |
| H | 1.76511  | -2.17523 | -0.00014 |
| C | 4.21600  | -0.41681 | -0.00018 |
| H | 2.71387  | 1.92026  | 0.00004  |
| H | 4.69156  | 0.02682  | -0.88420 |
| H | 4.69167  | 0.02676  | 0.88380  |
| H | 4.43945  | -1.48687 | -0.00023 |
| H | -0.66079 | 2.30532  | -0.87838 |
| H | -0.66114 | 2.30495  | 0.87851  |
| H | 0.63177  | 3.14744  | 0.00049  |
| C | -0.85890 | -0.93144 | 0.00010  |
| O | -1.09086 | -2.13458 | 0.00012  |
| O | -1.84640 | -0.00009 | 0.00013  |
| C | -3.19915 | -0.50245 | 0.00015  |
| C | -4.12545 | 0.69749  | -0.00043 |
| H | -3.34534 | -1.13105 | -0.88391 |
| H | -3.34556 | -1.13036 | 0.88467  |
| H | -3.96202 | 1.31622  | 0.88783  |
| H | -3.96182 | 1.31552  | -0.88914 |
| H | -5.16746 | 0.36126  | -0.00042 |

#### 4d\_conformer-005

|   |          |          |          |
|---|----------|----------|----------|
| C | -0.91941 | 1.05402  | -0.03599 |
| C | -0.40580 | -0.24343 | -0.11453 |
| C | -1.51256 | -1.15289 | -0.02881 |
| C | -2.66024 | -0.41081 | 0.09656  |



|   |          |          |          |
|---|----------|----------|----------|
| N | -2.27305 | 0.92236  | 0.08971  |
| C | -0.26691 | 2.39823  | -0.06750 |
| H | -1.44717 | -2.23127 | -0.05858 |
| C | -4.09310 | -0.81128 | 0.22441  |
| H | -2.91104 | 1.70297  | 0.16880  |
| H | -4.53615 | -0.45299 | 1.16237  |
| H | -4.70356 | -0.41545 | -0.59722 |
| H | -4.17547 | -1.90119 | 0.20897  |
| H | -1.00765 | 3.19138  | 0.07385  |
| H | 0.49061  | 2.48740  | 0.71697  |
| H | 0.24358  | 2.56996  | -1.02092 |
| C | 0.98154  | -0.65722 | -0.25337 |
| O | 1.35869  | -1.82205 | -0.30230 |
| O | 1.83667  | 0.39704  | -0.33009 |
| C | 3.24401  | 0.08579  | -0.43287 |
| C | 3.85172  | -0.17536 | 0.93600  |
| H | 3.36973  | -0.77430 | -1.09421 |
| H | 3.68342  | 0.96843  | -0.90276 |
| H | 3.68973  | 0.67959  | 1.60051  |
| H | 3.40609  | -1.06469 | 1.39018  |
| H | 4.93085  | -0.33857 | 0.83987  |

#### 4d\_conformer-006

|   |          |          |          |
|---|----------|----------|----------|
| C | 0.91941  | 1.05402  | -0.03599 |
| C | 0.40580  | -0.24343 | -0.11453 |
| C | 1.51256  | -1.15289 | -0.02881 |
| C | 2.66024  | -0.41081 | 0.09656  |
| N | 2.27305  | 0.92236  | 0.08971  |
| C | 0.26691  | 2.39823  | -0.06750 |
| H | 1.44717  | -2.23127 | -0.05858 |
| C | 4.09310  | -0.81128 | 0.22441  |
| H | 2.91104  | 1.70297  | 0.16880  |
| H | 4.70356  | -0.41545 | -0.59722 |
| H | 4.53614  | -0.45299 | 1.16237  |
| H | 4.17547  | -1.90119 | 0.20897  |
| H | 1.00766  | 3.19138  | 0.07384  |
| H | -0.24358 | 2.56996  | -1.02091 |
| H | -0.49061 | 2.48740  | 0.71697  |
| C | -0.98154 | -0.65722 | -0.25337 |
| O | -1.35869 | -1.82205 | -0.30231 |
| O | -1.83667 | 0.39704  | -0.33009 |
| C | -3.24401 | 0.08579  | -0.43287 |
| C | -3.85172 | -0.17536 | 0.93600  |
| H | -3.68342 | 0.96843  | -0.90276 |
| H | -3.36973 | -0.77430 | -1.09421 |

|   |          |          |         |
|---|----------|----------|---------|
| H | -4.93085 | -0.33857 | 0.83987 |
| H | -3.40609 | -1.06469 | 1.39018 |
| H | -3.68973 | 0.67959  | 1.60051 |

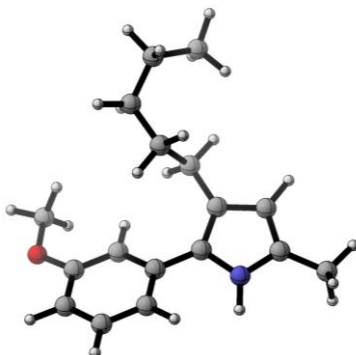

4e\_conformer-001

|   |          |          |          |
|---|----------|----------|----------|
| C | 2.73853  | -2.16716 | -0.35096 |
| C | 0.68049  | -1.31637 | 0.10900  |
| N | 1.39026  | -2.28963 | -0.58173 |
| H | 0.97815  | -2.91536 | -1.25905 |
| C | 2.89741  | -1.11576 | 0.53225  |
| C | 3.74030  | -3.06078 | -1.00630 |
| H | 3.55527  | -4.11852 | -0.77957 |
| H | 3.73075  | -2.95625 | -2.09916 |
| H | 4.74580  | -2.81260 | -0.65599 |
| C | -0.78125 | -1.27782 | 0.03629  |
| C | -1.52095 | -2.47509 | -0.07518 |
| C | -1.47877 | -0.06371 | 0.05751  |
| C | -2.90788 | -2.43552 | -0.15623 |
| H | -1.00617 | -3.43085 | -0.06755 |
| C | -2.87719 | -0.03324 | -0.00567 |
| H | -0.94800 | 0.87884  | 0.09152  |
| C | -3.60506 | -1.22351 | -0.11754 |
| H | -3.46766 | -3.36314 | -0.23803 |
| H | -4.68643 | -1.22045 | -0.17594 |
| O | -3.43593 | 1.21274  | 0.02963  |
| C | -4.85375 | 1.30917  | -0.05750 |
| H | -5.08429 | 2.37455  | -0.01726 |
| H | -5.22538 | 0.89040  | -1.00053 |
| H | -5.34129 | 0.79851  | 0.78168  |
| C | 1.61088  | -0.57084 | 0.83116  |
| C | 1.36235  | 0.54445  | 1.80989  |
| H | 0.28779  | 0.65859  | 1.99029  |
| H | 1.80857  | 0.27486  | 2.77730  |
| C | 1.95997  | 1.89606  | 1.36953  |
| H | 1.86623  | 2.61350  | 2.19625  |
| H | 3.03694  | 1.76554  | 1.19406  |
| C | 1.31375  | 2.48348  | 0.11318  |

|   |         |          |          |
|---|---------|----------|----------|
| H | 1.33126 | 1.73308  | -0.68921 |
| H | 0.25363 | 2.69634  | 0.31548  |
| C | 1.99302 | 3.76558  | -0.37712 |
| H | 1.98697 | 4.51187  | 0.42980  |
| H | 3.05029 | 3.55363  | -0.58969 |
| C | 1.32616 | 4.35237  | -1.62365 |
| H | 1.83105 | 5.26555  | -1.95873 |
| H | 1.34475 | 3.63495  | -2.45331 |
| H | 0.27640 | 4.60263  | -1.42682 |
| H | 3.84300 | -0.77792 | 0.93754  |

4e\_conformer-002

|   |          |          |          |
|---|----------|----------|----------|
| C | 1.02251  | 3.30288  | -0.26397 |
| C | -0.28398 | 1.48347  | 0.12780  |
| N | -0.21770 | 2.74356  | -0.45106 |
| H | -0.94071 | 3.13275  | -1.03912 |
| C | 1.75878  | 2.39924  | 0.47911  |
| C | 1.38210  | 4.64049  | -0.82355 |
| H | 1.33624  | 4.65229  | -1.92040 |
| H | 0.71030  | 5.42930  | -0.46172 |
| H | 2.40116  | 4.90541  | -0.52914 |
| C | -1.52649 | 0.71122  | 0.07581  |
| C | -2.77229 | 1.36081  | 0.11539  |
| C | -1.49531 | -0.69246 | -0.03546 |
| C | -3.95321 | 0.61931  | 0.04889  |
| H | -2.81684 | 2.43971  | 0.22736  |
| C | -2.68303 | -1.42553 | -0.08152 |
| H | -0.54010 | -1.18824 | -0.12061 |
| C | -3.92176 | -0.76820 | -0.04310 |
| H | -4.91127 | 1.13056  | 0.08281  |
| H | -4.83235 | -1.35674 | -0.08846 |
| O | -2.73503 | -2.78629 | -0.18415 |
| C | -1.50301 | -3.49939 | -0.21281 |
| H | -0.91726 | -3.31980 | 0.69705  |
| H | -1.76906 | -4.55552 | -0.27179 |
| H | -0.90189 | -3.22543 | -1.08839 |
| C | 0.94972  | 1.24947  | 0.73398  |
| C | 1.37467  | 0.07696  | 1.57595  |
| H | 1.69924  | 0.44504  | 2.55915  |
| H | 0.52177  | -0.58407 | 1.76538  |
| C | 2.53464  | -0.73706 | 0.96672  |
| H | 3.38424  | -0.06295 | 0.78761  |
| H | 2.87277  | -1.47150 | 1.70814  |
| C | 2.17288  | -1.44406 | -0.34288 |
| H | 1.40863  | -2.20931 | -0.14108 |

|   |         |          |          |
|---|---------|----------|----------|
| H | 1.71290 | -0.71482 | -1.02238 |
| C | 3.36225 | -2.10713 | -1.05070 |
| H | 3.02421 | -2.49600 | -2.02043 |
| H | 4.11864 | -1.34138 | -1.27379 |
| C | 4.00697 | -3.24506 | -0.25281 |
| H | 3.26635 | -4.01535 | -0.00292 |
| H | 4.80859 | -3.72504 | -0.82555 |
| H | 4.44117 | -2.88593 | 0.68668  |
| H | 2.77474 | 2.55252  | 0.82100  |

4e\_conformer-003

|   |          |          |          |
|---|----------|----------|----------|
| C | 3.36248  | -1.14003 | -0.10871 |
| C | 1.11076  | -0.82047 | -0.11922 |
| N | 2.16604  | -1.52589 | 0.44139  |
| H | 2.05102  | -2.30008 | 1.07999  |
| C | 3.07263  | -0.14195 | -1.02242 |
| C | 4.65892  | -1.76897 | 0.28492  |
| H | 5.48303  | -1.28670 | -0.24763 |
| H | 4.85052  | -1.67223 | 1.36124  |
| H | 4.68616  | -2.84002 | 0.04500  |
| C | -0.25854 | -1.03577 | 0.34592  |
| C | -0.52044 | -1.36368 | 1.68668  |
| C | -1.33928 | -0.91025 | -0.54841 |
| C | -1.83516 | -1.54905 | 2.11903  |
| H | 0.29727  | -1.43666 | 2.39699  |
| C | -2.65093 | -1.07540 | -0.10068 |
| H | -1.13402 | -0.69302 | -1.58788 |
| C | -2.90337 | -1.40125 | 1.24111  |
| H | -2.02900 | -1.79523 | 3.15928  |
| H | -3.93040 | -1.52977 | 1.56704  |
| O | -3.75221 | -0.95337 | -0.89851 |
| C | -3.55158 | -0.57485 | -2.25662 |
| H | -4.54692 | -0.49689 | -2.69584 |
| H | -3.04197 | 0.39368  | -2.32880 |
| H | -2.97123 | -1.32962 | -2.80088 |
| C | 1.66228  | 0.06828  | -1.04454 |
| C | 0.97201  | 1.14273  | -1.84810 |
| H | 1.74616  | 1.71314  | -2.37736 |
| H | 0.34007  | 0.70355  | -2.63287 |
| C | 0.11352  | 2.11498  | -1.01557 |
| H | -0.31557 | 2.87053  | -1.68840 |
| H | -0.73168 | 1.56476  | -0.59320 |
| C | 0.88161  | 2.81307  | 0.11036  |
| H | 1.42505  | 2.05911  | 0.69476  |
| H | 1.64400  | 3.47289  | -0.32758 |

|   |          |         |          |
|---|----------|---------|----------|
| C | -0.01689 | 3.62130 | 1.05800  |
| H | 0.61739  | 4.21493 | 1.72976  |
| H | -0.60794 | 4.34398 | 0.47725  |
| C | -0.95599 | 2.75143 | 1.90270  |
| H | -0.38726 | 2.01508 | 2.48402  |
| H | -1.53463 | 3.36125 | 2.60593  |
| H | -1.66854 | 2.19569 | 1.28347  |
| H | 3.80181  | 0.39908 | -1.61270 |

4e\_conformer-004

|   |          |          |          |
|---|----------|----------|----------|
| C | -3.36206 | -1.14088 | -0.10831 |
| C | -1.11043 | -0.82072 | -0.11888 |
| N | -2.16555 | -1.52613 | 0.44207  |
| H | -2.05039 | -2.29979 | 1.08128  |
| C | -3.07243 | -0.14324 | -1.02258 |
| C | -4.65836 | -1.76988 | 0.28565  |
| H | -4.68515 | -2.84118 | 0.04681  |
| H | -4.85028 | -1.67210 | 1.36182  |
| H | -5.48252 | -1.28845 | -0.24761 |
| C | 0.25889  | -1.03534 | 0.34646  |
| C | 0.52085  | -1.36185 | 1.68754  |
| C | 1.33960  | -0.91049 | -0.54800 |
| C | 1.83560  | -1.54655 | 2.12007  |
| H | -0.29687 | -1.43425 | 2.39790  |
| C | 2.65128  | -1.07497 | -0.10012 |
| H | 1.13428  | -0.69427 | -1.58769 |
| C | 2.90378  | -1.39943 | 1.24200  |
| H | 2.02949  | -1.79164 | 3.16057  |
| H | 3.93083  | -1.52745 | 1.56804  |
| O | 3.75252  | -0.95356 | -0.89807 |
| C | 3.55179  | -0.57658 | -2.25658 |
| H | 3.04205  | 0.39180  | -2.32983 |
| H | 4.54711  | -0.49897 | -2.69592 |
| H | 2.97152  | -1.33203 | -2.79998 |
| C | -1.66213 | 0.06734  | -1.04473 |
| C | -0.97204 | 1.14154  | -1.84876 |
| H | -0.33976 | 0.70212  | -2.63313 |
| H | -1.74626 | 1.71140  | -2.37853 |
| C | -0.11408 | 2.11450  | -1.01653 |
| H | 0.73134  | 1.56481  | -0.59388 |
| H | 0.31474  | 2.87000  | -1.68959 |
| C | -0.88262 | 2.81262  | 0.10907  |
| H | -1.64546 | 3.47172  | -0.32918 |
| H | -1.42555 | 2.05856  | 0.69381  |
| C | 0.01532  | 3.62189  | 1.05633  |

|   |          |         |          |
|---|----------|---------|----------|
| H | 0.60597  | 4.34462 | 0.47524  |
| H | -0.61937 | 4.21549 | 1.72774  |
| C | 0.95490  | 2.75304 | 1.90155  |
| H | 0.38658  | 2.01663 | 2.48321  |
| H | 1.66783  | 2.19742 | 1.28267  |
| H | 1.53311  | 3.36358 | 2.60451  |
| H | -3.80172 | 0.39725 | -1.61322 |

4e\_conformer-005

|   |          |          |          |
|---|----------|----------|----------|
| C | -3.32983 | -1.16034 | 0.29135  |
| C | -1.08427 | -0.82787 | 0.17719  |
| N | -2.13455 | -1.67367 | -0.15046 |
| H | -2.01422 | -2.59782 | -0.54005 |
| C | -3.04598 | 0.05517  | 0.88585  |
| C | -4.62069 | -1.89139 | 0.11563  |
| H | -4.62395 | -2.85331 | 0.64489  |
| H | -5.44511 | -1.29084 | 0.50940  |
| H | -4.83086 | -2.10133 | -0.94090 |
| C | 0.28468  | -1.14716 | -0.23003 |
| C | 0.53507  | -1.76159 | -1.46809 |
| C | 1.37186  | -0.83951 | 0.61135  |
| C | 1.84533  | -2.04675 | -1.85695 |
| H | -0.29042 | -1.98310 | -2.13742 |
| C | 2.68014  | -1.10376 | 0.20016  |
| H | 1.17492  | -0.41783 | 1.58740  |
| C | 2.92051  | -1.71571 | -1.03950 |
| H | 2.03066  | -2.51748 | -2.81840 |
| H | 3.94451  | -1.91946 | -1.33541 |
| O | 3.78786  | -0.81836 | 0.94512  |
| C | 3.60149  | -0.14392 | 2.18537  |
| H | 3.02425  | -0.75403 | 2.89050  |
| H | 4.60126  | 0.02531  | 2.58721  |
| H | 3.09572  | 0.81878  | 2.04210  |
| C | -1.63564 | 0.27699  | 0.82339  |
| C | -0.94551 | 1.54303  | 1.25151  |
| H | -1.18705 | 1.75983  | 2.30111  |
| H | 0.13953  | 1.41876  | 1.20907  |
| C | -1.34349 | 2.76654  | 0.39980  |
| H | -2.42275 | 2.93781  | 0.50457  |
| H | -0.84985 | 3.65509  | 0.81423  |
| C | -1.01013 | 2.63123  | -1.09280 |
| H | -1.59878 | 1.80561  | -1.51275 |
| H | -1.34278 | 3.54445  | -1.60654 |
| C | 0.47315  | 2.39057  | -1.41580 |
| H | 0.78393  | 1.41570  | -1.02414 |

|   |          |         |          |
|---|----------|---------|----------|
| H | 0.58141  | 2.32506 | -2.50683 |
| C | 1.41456  | 3.47410 | -0.88177 |
| H | 1.41769  | 3.50211 | 0.21388  |
| H | 2.44550  | 3.29622 | -1.20864 |
| H | 1.11698  | 4.46901 | -1.23677 |
| H | -3.77905 | 0.72623 | 1.31590  |

4e\_conformer-006

|   |          |          |          |
|---|----------|----------|----------|
| C | -1.94561 | 2.69623  | -0.19186 |
| C | -0.11517 | 1.39206  | 0.15438  |
| N | -0.60574 | 2.54168  | -0.45040 |
| H | -0.07674 | 3.10789  | -1.09819 |
| C | -2.31788 | 1.64369  | 0.62308  |
| C | -2.73790 | 3.82899  | -0.75802 |
| H | -2.32758 | 4.80309  | -0.46268 |
| H | -2.76129 | 3.80541  | -1.85539 |
| H | -3.76987 | 3.77649  | -0.40079 |
| C | 1.30120  | 1.04197  | 0.03518  |
| C | 2.28171  | 2.04692  | -0.03058 |
| C | 1.70396  | -0.30577 | -0.03598 |
| C | 3.62922  | 1.70584  | -0.15992 |
| H | 1.99375  | 3.09059  | 0.04930  |
| C | 3.05649  | -0.63577 | -0.14496 |
| H | 0.94822  | -1.07667 | -0.04108 |
| C | 4.02775  | 0.37427  | -0.21151 |
| H | 4.37975  | 2.48998  | -0.20716 |
| H | 5.07243  | 0.09562  | -0.30443 |
| O | 3.52520  | -1.91660 | -0.21384 |
| C | 2.57908  | -2.97735 | -0.13125 |
| H | 1.86972  | -2.94770 | -0.96731 |
| H | 3.15831  | -3.90028 | -0.17998 |
| H | 2.02379  | -2.94328 | 0.81414  |
| C | -1.17650 | 0.81491  | 0.85045  |
| C | -1.16839 | -0.39370 | 1.74723  |
| H | -0.14463 | -0.75665 | 1.88992  |
| H | -1.52992 | -0.09965 | 2.74241  |
| C | -2.06185 | -1.54195 | 1.23582  |
| H | -2.13142 | -2.31570 | 2.01281  |
| H | -3.07761 | -1.15208 | 1.09507  |
| C | -1.56344 | -2.17930 | -0.06441 |
| H | -1.39999 | -1.39248 | -0.81389 |
| H | -0.58325 | -2.63952 | 0.12349  |
| C | -2.50309 | -3.24452 | -0.64743 |
| H | -1.99005 | -3.75170 | -1.47523 |
| H | -2.69448 | -4.01541 | 0.11245  |

|   |          |          |          |
|---|----------|----------|----------|
| C | -3.83519 | -2.68466 | -1.15725 |
| H | -3.66723 | -1.90759 | -1.91341 |
| H | -4.44492 | -3.47178 | -1.61511 |
| H | -4.42553 | -2.23814 | -0.34975 |
| H | -3.30926 | 1.48941  | 1.03035  |

4e\_conformer-007

|   |          |          |          |
|---|----------|----------|----------|
| C | 1.94562  | 2.69622  | -0.19186 |
| C | 0.11517  | 1.39206  | 0.15438  |
| N | 0.60576  | 2.54168  | -0.45039 |
| H | 0.07676  | 3.10789  | -1.09819 |
| C | 2.31789  | 1.64368  | 0.62308  |
| C | 2.73792  | 3.82898  | -0.75801 |
| H | 2.76131  | 3.80540  | -1.85538 |
| H | 2.32760  | 4.80308  | -0.46268 |
| H | 3.76988  | 3.77648  | -0.40078 |
| C | -1.30120 | 1.04198  | 0.03518  |
| C | -2.28170 | 2.04692  | -0.03059 |
| C | -1.70396 | -0.30576 | -0.03597 |
| C | -3.62922 | 1.70585  | -0.15993 |
| H | -1.99374 | 3.09060  | 0.04929  |
| C | -3.05649 | -0.63576 | -0.14495 |
| H | -0.94822 | -1.07666 | -0.04107 |
| C | -4.02775 | 0.37428  | -0.21152 |
| H | -4.37974 | 2.49000  | -0.20717 |
| H | -5.07242 | 0.09564  | -0.30444 |
| O | -3.52520 | -1.91658 | -0.21383 |
| C | -2.57909 | -2.97734 | -0.13124 |
| H | -2.02379 | -2.94326 | 0.81415  |
| H | -3.15832 | -3.90027 | -0.17997 |
| H | -1.86972 | -2.94770 | -0.96730 |
| C | 1.17650  | 0.81490  | 0.85046  |
| C | 1.16838  | -0.39371 | 1.74724  |
| H | 1.52991  | -0.09966 | 2.74241  |
| H | 0.14463  | -0.75665 | 1.88992  |
| C | 2.06184  | -1.54197 | 1.23582  |
| H | 3.07760  | -1.15209 | 1.09507  |
| H | 2.13140  | -2.31571 | 2.01281  |
| C | 1.56343  | -2.17931 | -0.06441 |
| H | 0.58323  | -2.63953 | 0.12349  |
| H | 1.39998  | -1.39248 | -0.81389 |
| C | 2.50308  | -3.24453 | -0.64744 |
| H | 2.69447  | -4.01542 | 0.11244  |
| H | 1.99004  | -3.75170 | -1.47524 |
| C | 3.83518  | -2.68466 | -1.15726 |



|   |         |          |          |
|---|---------|----------|----------|
| H | 3.66720 | -1.90759 | -1.91342 |
| H | 4.42552 | -2.23814 | -0.34977 |
| H | 4.44490 | -3.47178 | -1.61513 |
| H | 3.30926 | 1.48940  | 1.03036  |

4e\_conformer-008

|   |          |          |          |
|---|----------|----------|----------|
| C | -3.14279 | -1.23825 | -0.23697 |
| C | -0.92503 | -1.00024 | 0.20519  |
| N | -1.88711 | -1.74314 | -0.46701 |
| H | -1.67369 | -2.47106 | -1.13372 |
| C | -2.99032 | -0.16850 | 0.62562  |
| C | -4.36204 | -1.82312 | -0.87159 |
| H | -5.25186 | -1.28493 | -0.53414 |
| H | -4.32557 | -1.75762 | -1.96687 |
| H | -4.48990 | -2.88214 | -0.61351 |
| C | 0.48850  | -1.36649 | 0.11036  |
| C | 0.86764  | -2.71449 | -0.01288 |
| C | 1.49164  | -0.37700 | 0.11502  |
| C | 2.21577  | -3.05832 | -0.12455 |
| H | 0.11145  | -3.49310 | 0.00816  |
| C | 2.83862  | -0.73416 | 0.02116  |
| H | 1.20239  | 0.66211  | 0.16045  |
| C | 3.20622  | -2.08219 | -0.10300 |
| H | 2.49783  | -4.10349 | -0.21640 |
| H | 4.25828  | -2.33608 | -0.18215 |
| O | 3.86813  | 0.16302  | 0.02303  |
| C | 3.54946  | 1.54441  | 0.14880  |
| H | 3.01432  | 1.74756  | 1.08444  |
| H | 4.50322  | 2.07351  | 0.15304  |
| H | 2.94350  | 1.89317  | -0.69644 |
| C | -1.60066 | -0.00508 | 0.90994  |
| C | -1.04047 | 1.01150  | 1.86712  |
| H | -1.52674 | 0.87002  | 2.84281  |
| H | 0.02664  | 0.82976  | 2.03555  |
| C | -1.25046 | 2.48699  | 1.46248  |
| H | -2.31281 | 2.64748  | 1.23248  |
| H | -1.03126 | 3.10488  | 2.34325  |
| C | -0.39555 | 2.99995  | 0.29415  |
| H | 0.66328  | 2.78096  | 0.49926  |
| H | -0.46761 | 4.09685  | 0.27124  |
| C | -0.77005 | 2.46873  | -1.09543 |
| H | -0.66361 | 1.38007  | -1.12460 |
| H | -1.83434 | 2.67242  | -1.27805 |
| C | 0.07432  | 3.09786  | -2.20636 |
| H | 1.13976  | 2.87480  | -2.06615 |

|   |          |         |          |
|---|----------|---------|----------|
| H | -0.21551 | 2.72038 | -3.19358 |
| H | -0.03398 | 4.18960 | -2.21845 |
| H | -3.79788 | 0.43281 | 1.02395  |

4e\_conformer-009

|   |          |          |          |
|---|----------|----------|----------|
| C | 3.14280  | -1.23824 | -0.23700 |
| C | 0.92504  | -1.00023 | 0.20518  |
| N | 1.88711  | -1.74313 | -0.46703 |
| H | 1.67369  | -2.47107 | -1.13372 |
| C | 2.99033  | -0.16849 | 0.62559  |
| C | 4.36204  | -1.82312 | -0.87162 |
| H | 4.48990  | -2.88213 | -0.61354 |
| H | 4.32556  | -1.75763 | -1.96690 |
| H | 5.25186  | -1.28493 | -0.53419 |
| C | -0.48849 | -1.36649 | 0.11037  |
| C | -0.86761 | -2.71450 | -0.01286 |
| C | -1.49164 | -0.37701 | 0.11502  |
| C | -2.21575 | -3.05834 | -0.12452 |
| H | -0.11142 | -3.49311 | 0.00818  |
| C | -2.83861 | -0.73418 | 0.02117  |
| H | -1.20239 | 0.66209  | 0.16043  |
| C | -3.20620 | -2.08222 | -0.10297 |
| H | -2.49779 | -4.10352 | -0.21636 |
| H | -4.25826 | -2.33612 | -0.18212 |
| O | -3.86813 | 0.16299  | 0.02303  |
| C | -3.54946 | 1.54438  | 0.14875  |
| H | -3.01432 | 1.74757  | 1.08437  |
| H | -2.94351 | 1.89312  | -0.69651 |
| H | -4.50322 | 2.07348  | 0.15299  |
| C | 1.60067  | -0.00507 | 0.90992  |
| C | 1.04049  | 1.01150  | 1.86711  |
| H | -0.02662 | 0.82976  | 2.03555  |
| H | 1.52677  | 0.87001  | 2.84280  |
| C | 1.25048  | 2.48700  | 1.46249  |
| H | 1.03130  | 3.10487  | 2.34327  |
| H | 2.31282  | 2.64748  | 1.23247  |
| C | 0.39554  | 2.99998  | 0.29418  |
| H | -0.66329 | 2.78099  | 0.49931  |
| H | 0.46760  | 4.09687  | 0.27129  |
| C | 0.77000  | 2.46877  | -1.09542 |
| H | 1.83429  | 2.67247  | -1.27805 |
| H | 0.66356  | 1.38011  | -1.12458 |
| C | -0.07440 | 3.09791  | -2.20631 |
| H | -1.13983 | 2.87486  | -2.06606 |
| H | 0.03392  | 4.18966  | -2.21840 |

|   |         |         |          |
|---|---------|---------|----------|
| H | 0.21540 | 2.72044 | -3.19354 |
| H | 3.79789 | 0.43282 | 1.02391  |

4e\_conformer-010

|   |          |          |          |
|---|----------|----------|----------|
| C | -3.72691 | -0.83878 | 0.32804  |
| C | -1.68247 | 0.13506  | 0.11284  |
| N | -3.05585 | 0.32987  | 0.06899  |
| H | -3.49475 | 1.23576  | -0.01489 |
| C | -2.76363 | -1.81500 | 0.51377  |
| C | -5.21819 | -0.90309 | 0.38629  |
| H | -5.53915 | -1.93141 | 0.57315  |
| H | -5.62584 | -0.27380 | 1.18832  |
| H | -5.67904 | -0.57134 | -0.55290 |
| C | -0.76534 | 1.24021  | -0.16481 |
| C | -1.13099 | 2.26997  | -1.04892 |
| C | 0.49665  | 1.29781  | 0.45969  |
| C | -0.25238 | 3.32522  | -1.30046 |
| H | -2.08571 | 2.22935  | -1.56402 |
| C | 1.37250  | 2.35107  | 0.19076  |
| H | 0.76728  | 0.52792  | 1.16796  |
| C | 0.99760  | 3.37440  | -0.69346 |
| H | -0.54325 | 4.11359  | -1.98915 |
| H | 1.69248  | 4.18574  | -0.88440 |
| O | 2.60953  | 2.48089  | 0.75429  |
| C | 3.02385  | 1.49411  | 1.69414  |
| H | 3.06623  | 0.49925  | 1.23700  |
| H | 4.02344  | 1.78927  | 2.01589  |
| H | 2.35446  | 1.46495  | 2.56250  |
| C | -1.47499 | -1.21850 | 0.38682  |
| C | -0.17124 | -1.97109 | 0.41493  |
| H | 0.51528  | -1.54663 | 1.15627  |
| H | -0.36865 | -2.99790 | 0.74893  |
| C | 0.52060  | -2.02381 | -0.96054 |
| H | -0.17102 | -2.49388 | -1.67150 |
| H | 0.68424  | -0.99966 | -1.31953 |
| C | 1.85429  | -2.78167 | -0.96283 |
| H | 1.70636  | -3.78840 | -0.54446 |
| H | 2.17841  | -2.92775 | -2.00279 |
| C | 2.97896  | -2.07430 | -0.19742 |
| H | 3.09956  | -1.05957 | -0.60265 |
| H | 2.69538  | -1.95301 | 0.85614  |
| C | 4.31323  | -2.82006 | -0.27543 |
| H | 4.22562  | -3.82772 | 0.14908  |
| H | 4.64387  | -2.92689 | -1.31585 |
| H | 5.10073  | -2.29237 | 0.27450  |

|   |          |          |         |
|---|----------|----------|---------|
| H | -2.96049 | -2.86082 | 0.71464 |
|---|----------|----------|---------|

4e\_conformer-011

|   |          |          |          |
|---|----------|----------|----------|
| C | 2.70096  | -1.93678 | -0.60326 |
| C | 0.95659  | -0.94822 | 0.46844  |
| N | 1.34891  | -1.98766 | -0.36243 |
| H | 0.74432  | -2.74909 | -0.63695 |
| C | 3.18008  | -0.82159 | 0.05929  |
| C | 3.40012  | -2.97030 | -1.42468 |
| H | 3.33859  | -3.96821 | -0.97086 |
| H | 2.97591  | -3.04596 | -2.43406 |
| H | 4.45832  | -2.71357 | -1.52347 |
| C | -0.45320 | -0.76267 | 0.82067  |
| C | -0.84001 | -0.36462 | 2.10892  |
| C | -1.44612 | -0.98429 | -0.15453 |
| C | -2.19080 | -0.17262 | 2.40524  |
| H | -0.08913 | -0.23133 | 2.87933  |
| C | -2.79585 | -0.80263 | 0.15646  |
| H | -1.14260 | -1.26239 | -1.15630 |
| C | -3.17179 | -0.38817 | 1.44296  |
| H | -2.48313 | 0.13642  | 3.40494  |
| H | -4.22504 | -0.24550 | 1.66204  |
| O | -3.81818 | -0.98804 | -0.72915 |
| C | -3.48819 | -1.38883 | -2.05501 |
| H | -2.86364 | -0.63828 | -2.55463 |
| H | -2.96841 | -2.35450 | -2.06282 |
| H | -4.43727 | -1.48247 | -2.58429 |
| C | 2.09417  | -0.19097 | 0.74022  |
| C | 2.18018  | 1.13125  | 1.45331  |
| H | 1.40938  | 1.20965  | 2.22653  |
| H | 3.14585  | 1.19414  | 1.97109  |
| C | 2.04630  | 2.34341  | 0.50659  |
| H | 2.24464  | 3.26086  | 1.07868  |
| H | 2.82443  | 2.28222  | -0.26710 |
| C | 0.67204  | 2.44780  | -0.15921 |
| H | 0.47303  | 1.52974  | -0.72610 |
| H | -0.10422 | 2.49462  | 0.61833  |
| C | 0.53205  | 3.65491  | -1.09023 |
| H | 0.72150  | 4.57849  | -0.52505 |
| H | 1.30974  | 3.60640  | -1.86569 |
| C | -0.84686 | 3.73108  | -1.75123 |
| H | -1.63942 | 3.81279  | -0.99714 |
| H | -0.92878 | 4.59639  | -2.41889 |
| H | -1.04787 | 2.82952  | -2.34324 |
| H | 4.20875  | -0.48265 | 0.05229  |

## 4e\_conformer-012

|   |          |          |          |
|---|----------|----------|----------|
| C | -2.70110 | -1.93666 | -0.60322 |
| C | -0.95668 | -0.94815 | 0.46845  |
| N | -1.34905 | -1.98762 | -0.36236 |
| H | -0.74450 | -2.74910 | -0.63682 |
| C | -3.18015 | -0.82141 | 0.05926  |
| C | -3.40030 | -2.97019 | -1.42459 |
| H | -4.45847 | -2.71337 | -1.52346 |
| H | -2.97605 | -3.04597 | -2.43394 |
| H | -3.33890 | -3.96807 | -0.97069 |
| C | 0.45311  | -0.76267 | 0.82068  |
| C | 0.83994  | -0.36455 | 2.10891  |
| C | 1.44603  | -0.98440 | -0.15450 |
| C | 2.19073  | -0.17261 | 2.40522  |
| H | 0.08906  | -0.23117 | 2.87930  |
| C | 2.79577  | -0.80279 | 0.15649  |
| H | 1.14251  | -1.26256 | -1.15625 |
| C | 3.17172  | -0.38827 | 1.44297  |
| H | 2.48307  | 0.13648  | 3.40491  |
| H | 4.22498  | -0.24565 | 1.66205  |
| O | 3.81810  | -0.98831 | -0.72910 |
| C | 3.48811  | -1.38917 | -2.05494 |
| H | 2.86360  | -0.63862 | -2.55461 |
| H | 4.43719  | -1.48289 | -2.58420 |
| H | 2.96828  | -2.35482 | -2.06269 |
| C | -2.09422 | -0.19081 | 0.74017  |
| C | -2.18017 | 1.13144  | 1.45321  |
| H | -3.14587 | 1.19442  | 1.97092  |
| H | -1.40941 | 1.20982  | 2.22648  |
| C | -2.04613 | 2.34355  | 0.50646  |
| H | -2.82423 | 2.28240  | -0.26729 |
| H | -2.24445 | 3.26103  | 1.07850  |
| C | -0.67183 | 2.44784  | -0.15926 |
| H | 0.10439  | 2.49460  | 0.61831  |
| H | -0.47286 | 1.52975  | -0.72613 |
| C | -0.53171 | 3.65492  | -1.09030 |
| H | -1.30935 | 3.60645  | -1.86580 |
| H | -0.72114 | 4.57853  | -0.52513 |
| C | 0.84724  | 3.73100  | -1.75121 |
| H | 1.63977  | 3.81268  | -0.99707 |
| H | 1.04824  | 2.82943  | -2.34320 |
| H | 0.92925  | 4.59630  | -2.41888 |
| H | -4.20881 | -0.48240 | 0.05223  |

## 4e\_conformer-013

|   |          |          |          |
|---|----------|----------|----------|
| C | 3.39387  | -0.79462 | -0.41278 |
| C | 1.17730  | -0.87123 | 0.09122  |
| N | 2.23074  | -1.51064 | -0.54918 |
| H | 2.11948  | -2.32014 | -1.14288 |
| C | 3.09180  | 0.31076  | 0.35952  |
| C | 4.67379  | -1.23091 | -1.04763 |
| H | 4.96597  | -2.23897 | -0.72704 |
| H | 4.60458  | -1.24560 | -2.14325 |
| H | 5.47877  | -0.54386 | -0.77320 |
| C | -0.14607 | -1.50147 | 0.11104  |
| C | -0.24942 | -2.89980 | 0.20874  |
| C | -1.32459 | -0.73629 | 0.00596  |
| C | -1.50188 | -3.51555 | 0.20368  |
| H | 0.64843  | -3.50010 | 0.31706  |
| C | -2.57427 | -1.36306 | 0.01878  |
| H | -1.24400 | 0.33449  | -0.12122 |
| C | -2.66500 | -2.75999 | 0.11521  |
| H | -1.57066 | -4.59693 | 0.28234  |
| H | -3.64659 | -3.22267 | 0.11537  |
| O | -3.76733 | -0.70692 | -0.08005 |
| C | -3.74806 | 0.71287  | -0.16804 |
| H | -3.21179 | 1.05179  | -1.06178 |
| H | -4.79152 | 1.02411  | -0.23234 |
| H | -3.28877 | 1.15967  | 0.72169  |
| C | 1.69971  | 0.27720  | 0.68434  |
| C | 1.01231  | 1.26406  | 1.59087  |
| H | -0.05568 | 1.03541  | 1.66285  |
| H | 1.41057  | 1.15511  | 2.61000  |
| C | 1.21852  | 2.72996  | 1.15584  |
| H | 0.83129  | 3.39451  | 1.94036  |
| H | 2.29658  | 2.92345  | 1.09572  |
| C | 0.56068  | 3.08473  | -0.18450 |
| H | 1.01856  | 3.99719  | -0.58988 |
| H | 0.77331  | 2.28639  | -0.90924 |
| C | -0.95286 | 3.30164  | -0.08545 |
| H | -1.41785 | 2.44438  | 0.41674  |
| H | -1.14829 | 4.16728  | 0.56239  |
| C | -1.61617 | 3.51606  | -1.44734 |
| H | -1.47008 | 2.64409  | -2.09705 |
| H | -2.69450 | 3.68573  | -1.34957 |
| H | -1.18604 | 4.38447  | -1.96121 |
| H | 3.80371  | 1.06398  | 0.67203  |

## 4e\_conformer-014

|   |          |          |          |
|---|----------|----------|----------|
| C | -3.39375 | -0.79505 | -0.41262 |
| C | -1.17714 | -0.87133 | 0.09122  |
| N | -2.23052 | -1.51089 | -0.54912 |
| H | -2.11918 | -2.32034 | -1.14286 |
| C | -3.09179 | 0.31037  | 0.35969  |
| C | -4.67364 | -1.23151 | -1.04740 |
| H | -4.96561 | -2.23964 | -0.72688 |
| H | -5.47871 | -0.54461 | -0.77285 |
| H | -4.60451 | -1.24609 | -2.14304 |
| C | 0.14631  | -1.50142 | 0.11099  |
| C | 0.24984  | -2.89975 | 0.20840  |
| C | 1.32475  | -0.73607 | 0.00612  |
| C | 1.50237  | -3.51535 | 0.20327  |
| H | -0.64794 | -3.50020 | 0.31659  |
| C | 2.57450  | -1.36270 | 0.01886  |
| H | 1.24405  | 0.33472  | -0.12088 |
| C | 2.66541  | -2.75963 | 0.11500  |
| H | 1.57127  | -4.59674 | 0.28169  |
| H | 3.64705  | -3.22219 | 0.11511  |
| O | 3.76749  | -0.70639 | -0.07978 |
| C | 3.74806  | 0.71341  | -0.16747 |
| H | 3.21183  | 1.05246  | -1.06118 |
| H | 3.28864  | 1.15998  | 0.72231  |
| H | 4.79149  | 1.02478  | -0.23162 |
| C | -1.69968 | 0.27701  | 0.68440  |
| C | -1.01238 | 1.26396  | 1.59092  |
| H | -1.41059 | 1.15494  | 2.61007  |
| H | 0.05564  | 1.03544  | 1.66286  |
| C | -1.21880 | 2.72982  | 1.15590  |
| H | -2.29691 | 2.92320  | 1.09595  |
| H | -0.83152 | 3.39443  | 1.94035  |
| C | -0.56125 | 3.08463  | -0.18456 |
| H | -0.77397 | 2.28627  | -0.90925 |
| H | -1.01926 | 3.99706  | -0.58986 |
| C | 0.95230  | 3.30164  | -0.08581 |
| H | 1.14780  | 4.16733  | 0.56195  |
| H | 1.41744  | 2.44443  | 0.41632  |
| C | 1.61532  | 3.51604  | -1.44785 |
| H | 1.18503  | 4.38438  | -1.96168 |
| H | 2.69366  | 3.68579  | -1.35030 |
| H | 1.46917  | 2.64401  | -2.09748 |
| H | -3.80379 | 1.06347  | 0.67227  |

4e\_conformer-015

|   |          |          |          |
|---|----------|----------|----------|
| C | 1.28830  | 2.96446  | -0.09381 |
| C | -0.29402 | 1.34622  | 0.12806  |
| N | -0.00702 | 2.60763  | -0.37479 |
| H | -0.63258 | 3.13826  | -0.96381 |
| C | 1.83998  | 1.92242  | 0.62924  |
| C | 1.87363  | 4.25950  | -0.55364 |
| H | 2.89774  | 4.35700  | -0.18351 |
| H | 1.90496  | 4.33017  | -1.64880 |
| H | 1.29917  | 5.12042  | -0.18871 |
| C | -1.63355 | 0.77680  | -0.00526 |
| C | -2.76377 | 1.61034  | -0.08272 |
| C | -1.81770 | -0.61901 | -0.06439 |
| C | -4.03797 | 1.05713  | -0.21607 |
| H | -2.65114 | 2.68728  | -0.00586 |
| C | -3.09917 | -1.16192 | -0.17706 |
| H | -0.95208 | -1.26399 | -0.05327 |
| C | -4.21912 | -0.32146 | -0.25901 |
| H | -4.90355 | 1.71129  | -0.27279 |
| H | -5.20524 | -0.76416 | -0.35441 |
| O | -3.35575 | -2.50213 | -0.23145 |
| C | -2.25190 | -3.39666 | -0.13522 |
| H | -1.70790 | -3.25930 | 0.80718  |
| H | -2.67669 | -4.40074 | -0.16791 |
| H | -1.55741 | -3.26714 | -0.97412 |
| C | 0.85928  | 0.89539  | 0.77394  |
| C | 1.04815  | -0.39057 | 1.53081  |
| H | 1.68377  | -0.19811 | 2.40580  |
| H | 0.08349  | -0.73544 | 1.92113  |
| C | 1.69158  | -1.53153 | 0.71409  |
| H | 1.67901  | -2.44613 | 1.32339  |
| H | 1.07801  | -1.74125 | -0.17317 |
| C | 3.12616  | -1.24464 | 0.26449  |
| H | 3.14036  | -0.33579 | -0.35089 |
| H | 3.74608  | -1.02704 | 1.14719  |
| C | 3.75228  | -2.39970 | -0.52273 |
| H | 3.73874  | -3.30965 | 0.09365  |
| H | 3.12839  | -2.61678 | -1.40132 |
| C | 5.18563  | -2.10622 | -0.97267 |
| H | 5.22138  | -1.21851 | -1.61615 |
| H | 5.83713  | -1.91613 | -0.11080 |
| H | 5.61098  | -2.94513 | -1.53522 |
| H | 2.84561  | 1.90118  | 1.02917  |

4e\_conformer-016

|   |          |         |         |
|---|----------|---------|---------|
| C | -1.71931 | 2.52761 | 0.10703 |
|---|----------|---------|---------|



|   |          |          |          |
|---|----------|----------|----------|
| C | -0.23584 | 0.87319  | 0.59595  |
| N | -0.40904 | 2.12865  | 0.02916  |
| H | 0.35008  | 2.71860  | -0.28074 |
| C | -2.41113 | 1.49386  | 0.71331  |
| C | -2.17667 | 3.85874  | -0.39291 |
| H | -1.70180 | 4.68712  | 0.14900  |
| H | -1.95031 | 3.99508  | -1.45810 |
| H | -3.25837 | 3.95246  | -0.26455 |
| C | 1.07961  | 0.23491  | 0.59986  |
| C | 1.45379  | -0.66942 | 1.61571  |
| C | 2.01027  | 0.52327  | -0.40895 |
| C | 2.71254  | -1.25731 | 1.59877  |
| H | 0.76534  | -0.88876 | 2.42294  |
| C | 3.28218  | -0.06177 | -0.41071 |
| H | 1.75568  | 1.18444  | -1.23126 |
| C | 3.64301  | -0.96459 | 0.59587  |
| H | 2.98981  | -1.95098 | 2.38778  |
| H | 4.61872  | -1.43407 | 0.60958  |
| O | 4.09303  | 0.30264  | -1.44765 |
| C | 5.39151  | -0.27814 | -1.51249 |
| H | 5.98914  | -0.01981 | -0.63003 |
| H | 5.33658  | -1.36952 | -1.60502 |
| H | 5.86157  | 0.13889  | -2.40407 |
| C | -1.49363 | 0.44963  | 1.03111  |
| C | -1.88946 | -0.88342 | 1.61101  |
| H | -1.37399 | -1.07437 | 2.56089  |
| H | -2.95556 | -0.83804 | 1.86146  |
| C | -1.63806 | -2.08051 | 0.66964  |
| H | -0.55675 | -2.22212 | 0.55749  |
| H | -2.02383 | -2.98881 | 1.15352  |
| C | -2.26540 | -1.93554 | -0.72215 |
| H | -1.82689 | -1.06264 | -1.22392 |
| H | -1.98832 | -2.81087 | -1.32660 |
| C | -3.79104 | -1.79611 | -0.71987 |
| H | -4.23304 | -2.64330 | -0.17584 |
| H | -4.07643 | -0.89214 | -0.16782 |
| C | -4.37744 | -1.72728 | -2.13212 |
| H | -4.13614 | -2.63149 | -2.70465 |
| H | -5.46850 | -1.62462 | -2.11169 |
| H | -3.97096 | -0.86955 | -2.68234 |
| H | -3.47649 | 1.48008  | 0.90672  |

4e\_conformer-017

|   |         |         |         |
|---|---------|---------|---------|
| C | 1.71911 | 2.52765 | 0.10700 |
| C | 0.23569 | 0.87319 | 0.59595 |

|   |          |          |          |
|---|----------|----------|----------|
| N | 0.40884  | 2.12865  | 0.02915  |
| H | -0.35030 | 2.71857  | -0.28075 |
| C | 2.41096  | 1.49392  | 0.71327  |
| C | 2.17642  | 3.85879  | -0.39295 |
| H | 1.70152  | 4.68715  | 0.14895  |
| H | 3.25812  | 3.95255  | -0.26460 |
| H | 1.95005  | 3.99512  | -1.45815 |
| C | -1.07977 | 0.23490  | 0.59988  |
| C | -1.45402 | -0.66925 | 1.61586  |
| C | -2.01035 | 0.52309  | -0.40904 |
| C | -2.71277 | -1.25714 | 1.59893  |
| H | -0.76563 | -0.88843 | 2.42320  |
| C | -3.28226 | -0.06193 | -0.41079 |
| H | -1.75569 | 1.18413  | -1.23144 |
| C | -3.64317 | -0.96458 | 0.59592  |
| H | -2.99011 | -1.95066 | 2.38805  |
| H | -4.61888 | -1.43405 | 0.60964  |
| O | -4.09304 | 0.30231  | -1.44785 |
| C | -5.39153 | -0.27847 | -1.51267 |
| H | -5.98921 | -0.01997 | -0.63030 |
| H | -5.86152 | 0.13842  | -2.40435 |
| H | -5.33661 | -1.36986 | -1.60502 |
| C | 1.49350  | 0.44966  | 1.03109  |
| C | 1.88938  | -0.88340 | 1.61094  |
| H | 2.95544  | -0.83793 | 1.86156  |
| H | 1.37378  | -1.07448 | 2.56072  |
| C | 1.63822  | -2.08043 | 0.66945  |
| H | 2.02392  | -2.98876 | 1.15336  |
| H | 0.55694  | -2.22208 | 0.55706  |
| C | 2.26586  | -1.93538 | -0.72221 |
| H | 1.98883  | -2.81063 | -1.32679 |
| H | 1.82751  | -1.06240 | -1.22398 |
| C | 3.79151  | -1.79608 | -0.71961 |
| H | 4.07688  | -0.89222 | -0.16738 |
| H | 4.23333  | -2.64338 | -0.17563 |
| C | 4.37818  | -1.72710 | -2.13175 |
| H | 3.97188  | -0.86925 | -2.68192 |
| H | 5.46924  | -1.62455 | -2.11110 |
| H | 4.13689  | -2.63120 | -2.70445 |
| H | 3.47633  | 1.48016  | 0.90666  |

4e\_conformer-018

|   |          |         |          |
|---|----------|---------|----------|
| C | -1.75917 | 3.15345 | -0.20837 |
| C | -1.36408 | 0.93282 | 0.07859  |
| N | -2.27106 | 1.88823 | -0.35798 |

|   |          |          |          |
|---|----------|----------|----------|
| H | -3.13768 | 1.67338  | -0.82980 |
| C | -0.50702 | 3.01201  | 0.36272  |
| C | -2.51509 | 4.37035  | -0.63174 |
| H | -1.93552 | 5.26781  | -0.39947 |
| H | -2.71866 | 4.37253  | -1.71054 |
| H | -3.48185 | 4.45082  | -0.11845 |
| C | -1.69486 | -0.49029 | 0.04751  |
| C | -3.02706 | -0.92603 | 0.16038  |
| C | -0.67871 | -1.45491 | -0.10385 |
| C | -3.32593 | -2.28890 | 0.12316  |
| H | -3.82452 | -0.20461 | 0.30939  |
| C | -0.98687 | -2.81616 | -0.11826 |
| H | 0.34018  | -1.12694 | -0.24187 |
| C | -2.31942 | -3.24035 | -0.00937 |
| H | -4.35867 | -2.61401 | 0.21364  |
| H | -2.53892 | -4.30286 | -0.03079 |
| O | -0.05398 | -3.80482 | -0.25182 |
| C | 1.31522  | -3.42209 | -0.33814 |
| H | 1.88219  | -4.35140 | -0.40550 |
| H | 1.50624  | -2.81324 | -1.23018 |
| H | 1.63048  | -2.86449 | 0.55229  |
| C | -0.24532 | 1.62230  | 0.54915  |
| C | 0.99729  | 1.04400  | 1.16465  |
| H | 1.33813  | 1.69877  | 1.97783  |
| H | 0.77115  | 0.07453  | 1.62552  |
| C | 2.15653  | 0.86754  | 0.16573  |
| H | 1.81081  | 0.28244  | -0.69826 |
| H | 2.43159  | 1.85233  | -0.23152 |
| C | 3.37442  | 0.17878  | 0.78852  |
| H | 3.76865  | 0.80345  | 1.60359  |
| H | 3.04592  | -0.76092 | 1.25551  |
| C | 4.50026  | -0.13096 | -0.20762 |
| H | 5.27721  | -0.71217 | 0.30638  |
| H | 4.10613  | -0.78108 | -1.00186 |
| C | 5.13776  | 1.11268  | -0.83520 |
| H | 5.52447  | 1.78692  | -0.06066 |
| H | 5.97352  | 0.84052  | -1.48971 |
| H | 4.41730  | 1.67763  | -1.43674 |
| H | 0.15344  | 3.82610  | 0.63437  |

4e\_conformer-019

|   |         |         |          |
|---|---------|---------|----------|
| C | 1.75921 | 3.15343 | -0.20837 |
| C | 1.36409 | 0.93281 | 0.07858  |
| N | 2.27108 | 1.88821 | -0.35798 |
| H | 3.13770 | 1.67334 | -0.82980 |

|   |          |          |          |
|---|----------|----------|----------|
| C | 0.50706  | 3.01201  | 0.36272  |
| C | 2.51514  | 4.37032  | -0.63174 |
| H | 3.48190  | 4.45078  | -0.11845 |
| H | 2.71871  | 4.37250  | -1.71054 |
| H | 1.93558  | 5.26779  | -0.39948 |
| C | 1.69485  | -0.49031 | 0.04751  |
| C | 3.02705  | -0.92606 | 0.16039  |
| C | 0.67870  | -1.45492 | -0.10386 |
| C | 3.32591  | -2.28893 | 0.12317  |
| H | 3.82452  | -0.20465 | 0.30939  |
| C | 0.98684  | -2.81617 | -0.11826 |
| H | -0.34019 | -1.12694 | -0.24188 |
| C | 2.31938  | -3.24037 | -0.00936 |
| H | 4.35864  | -2.61406 | 0.21365  |
| H | 2.53887  | -4.30289 | -0.03079 |
| O | 0.05394  | -3.80482 | -0.25182 |
| C | -1.31526 | -3.42207 | -0.33815 |
| H | -1.50627 | -2.81323 | -1.23019 |
| H | -1.88223 | -4.35138 | -0.40551 |
| H | -1.63052 | -2.86447 | 0.55227  |
| C | 0.24534  | 1.62230  | 0.54915  |
| C | -0.99728 | 1.04402  | 1.16465  |
| H | -0.77115 | 0.07455  | 1.62552  |
| H | -1.33811 | 1.69879  | 1.97783  |
| C | -2.15652 | 0.86756  | 0.16573  |
| H | -2.43157 | 1.85235  | -0.23152 |
| H | -1.81081 | 0.28246  | -0.69826 |
| C | -3.37441 | 0.17882  | 0.78852  |
| H | -3.04592 | -0.76089 | 1.25551  |
| H | -3.76864 | 0.80348  | 1.60359  |
| C | -4.50026 | -0.13092 | -0.20762 |
| H | -4.10614 | -0.78104 | -1.00186 |
| H | -5.27721 | -0.71213 | 0.30638  |
| C | -5.13775 | 1.11273  | -0.83520 |
| H | -4.41729 | 1.67767  | -1.43674 |
| H | -5.97351 | 0.84058  | -1.48970 |
| H | -5.52445 | 1.78697  | -0.06065 |
| H | -0.15340 | 3.82611  | 0.63437  |

4e\_conformer-020

|   |         |          |          |
|---|---------|----------|----------|
| C | 2.08195 | -2.52924 | -0.52358 |
| C | 0.51626 | -1.17499 | 0.41624  |
| N | 0.74297 | -2.22885 | -0.45732 |
| H | 0.00861 | -2.78001 | -0.87859 |
| C | 2.73200 | -1.62856 | 0.29988  |

|   |          |          |          |
|---|----------|----------|----------|
| C | 2.60167  | -3.65873 | -1.35168 |
| H | 2.21202  | -4.62874 | -1.01588 |
| H | 2.33060  | -3.54847 | -2.40945 |
| H | 3.69243  | -3.69660 | -1.28663 |
| C | -0.83605 | -0.64846 | 0.61340  |
| C | -1.27993 | -0.21499 | 1.87903  |
| C | -1.72510 | -0.57825 | -0.46756 |
| C | -2.56689 | 0.28753  | 2.03142  |
| H | -0.62500 | -0.30323 | 2.73814  |
| C | -3.02602 | -0.08667 | -0.30292 |
| H | -1.41208 | -0.87799 | -1.46284 |
| C | -3.45467 | 0.35926  | 0.95264  |
| H | -2.90117 | 0.61837  | 3.01087  |
| H | -4.45355 | 0.75052  | 1.10080  |
| O | -3.79403 | -0.06954 | -1.43194 |
| C | -5.11967 | 0.43987  | -1.32759 |
| H | -5.12031 | 1.48799  | -1.00494 |
| H | -5.54750 | 0.36759  | -2.32832 |
| H | -5.72193 | -0.15384 | -0.62941 |
| C | 1.75922  | -0.77221 | 0.90054  |
| C | 2.08487  | 0.42758  | 1.74778  |
| H | 1.22670  | 0.71666  | 2.36213  |
| H | 2.89202  | 0.16620  | 2.44443  |
| C | 2.52541  | 1.65062  | 0.91602  |
| H | 2.87175  | 2.43872  | 1.59997  |
| H | 3.38911  | 1.36606  | 0.30194  |
| C | 1.40772  | 2.20885  | 0.02954  |
| H | 1.06905  | 1.42602  | -0.66166 |
| H | 0.54263  | 2.44643  | 0.66431  |
| C | 1.80279  | 3.45689  | -0.77180 |
| H | 0.90843  | 3.85321  | -1.27102 |
| H | 2.14057  | 4.24210  | -0.08035 |
| C | 2.88753  | 3.20203  | -1.82371 |
| H | 2.57855  | 2.41081  | -2.51844 |
| H | 3.08884  | 4.10456  | -2.41202 |
| H | 3.83211  | 2.88906  | -1.36552 |
| H | 3.80307  | -1.58028 | 0.45323  |

#### 4e\_conformer-021

|   |          |          |          |
|---|----------|----------|----------|
| C | -2.08178 | -2.52928 | -0.52357 |
| C | -0.51612 | -1.17500 | 0.41624  |
| N | -0.74281 | -2.22885 | -0.45735 |
| H | -0.00844 | -2.77996 | -0.87865 |
| C | -2.73184 | -1.62865 | 0.29992  |
| C | -2.60148 | -3.65877 | -1.35170 |

|   |          |          |          |
|---|----------|----------|----------|
| H | -3.69224 | -3.69668 | -1.28662 |
| H | -2.33044 | -3.54848 | -2.40947 |
| H | -2.21179 | -4.62877 | -1.01593 |
| C | 0.83617  | -0.64843 | 0.61339  |
| C | 1.28008  | -0.21501 | 1.87903  |
| C | 1.72519  | -0.57812 | -0.46760 |
| C | 2.56702  | 0.28756  | 2.03141  |
| H | 0.62517  | -0.30332 | 2.73815  |
| C | 3.02610  | -0.08650 | -0.30297 |
| H | 1.41215  | -0.87782 | -1.46288 |
| C | 3.45476  | 0.35938  | 0.95260  |
| H | 2.90131  | 0.61835  | 3.01086  |
| H | 4.45363  | 0.75067  | 1.10075  |
| O | 3.79407  | -0.06926 | -1.43201 |
| C | 5.11969  | 0.44021  | -1.32767 |
| H | 5.72200  | -0.15352 | -0.62955 |
| H | 5.54749  | 0.36800  | -2.32843 |
| H | 5.12028  | 1.48831  | -1.00497 |
| C | -1.75909 | -0.77229 | 0.90058  |
| C | -2.08475 | 0.42748  | 1.74786  |
| H | -2.89178 | 0.16602  | 2.44463  |
| H | -1.22653 | 0.71664  | 2.36210  |
| C | -2.52552 | 1.65046  | 0.91615  |
| H | -3.38927 | 1.36581  | 0.30219  |
| H | -2.87186 | 2.43853  | 1.60014  |
| C | -1.40800 | 2.20879  | 0.02953  |
| H | -0.54287 | 2.44651  | 0.66419  |
| H | -1.06930 | 1.42597  | -0.66168 |
| C | -1.80331 | 3.45675  | -0.77183 |
| H | -2.14113 | 4.24194  | -0.08038 |
| H | -0.90905 | 3.85317  | -1.27115 |
| C | -2.88812 | 3.20170  | -1.82362 |
| H | -3.83261 | 2.88861  | -1.36533 |
| H | -3.08961 | 4.10419  | -2.41194 |
| H | -2.57910 | 2.41051  | -2.51836 |
| H | -3.80291 | -1.58042 | 0.45330  |

4e\_conformer-022

|   |         |          |          |
|---|---------|----------|----------|
| C | 3.37668 | -1.33890 | -0.02128 |
| C | 1.15715 | -0.86433 | -0.16557 |
| N | 2.12526 | -1.64346 | 0.45232  |
| H | 1.91901 | -2.41034 | 1.07664  |
| C | 3.21236 | -0.31918 | -0.94218 |
| C | 4.60067 | -2.05689 | 0.44528  |
| H | 4.57026 | -3.12603 | 0.19738  |

|   |          |          |          |
|---|----------|----------|----------|
| H | 5.48687  | -1.62914 | -0.03125 |
| H | 4.73160  | -1.97905 | 1.53218  |
| C | -0.24927 | -0.98594 | 0.21611  |
| C | -0.60969 | -1.28988 | 1.54588  |
| C | -1.26836 | -0.79582 | -0.72534 |
| C | -1.95029 | -1.38202 | 1.90224  |
| H | 0.16086  | -1.41462 | 2.30027  |
| C | -2.61586 | -0.87294 | -0.35565 |
| H | -1.03095 | -0.59046 | -1.76311 |
| C | -2.96801 | -1.17058 | 0.96684  |
| H | -2.21825 | -1.60732 | 2.93077  |
| H | -4.00469 | -1.23809 | 1.27239  |
| O | -3.51309 | -0.65446 | -1.36186 |
| C | -4.89931 | -0.72878 | -1.04536 |
| H | -5.17269 | -1.72570 | -0.67911 |
| H | -5.43005 | -0.52577 | -1.97642 |
| H | -5.17827 | 0.02109  | -0.29529 |
| C | 1.82367  | -0.01189 | -1.04764 |
| C | 1.25715  | 1.11073  | -1.88103 |
| H | 2.09777  | 1.62882  | -2.36046 |
| H | 0.64245  | 0.71868  | -2.70323 |
| C | 0.42075  | 2.13542  | -1.08998 |
| H | 0.08115  | 2.92080  | -1.77948 |
| H | -0.48140 | 1.64099  | -0.71933 |
| C | 1.17040  | 2.77602  | 0.08167  |
| H | 1.62950  | 1.98531  | 0.68940  |
| H | 1.99815  | 3.38485  | -0.30902 |
| C | 0.27752  | 3.63953  | 0.98486  |
| H | -0.22980 | 4.40343  | 0.37828  |
| H | 0.91235  | 4.18551  | 1.69543  |
| C | -0.76418 | 2.83231  | 1.76924  |
| H | -0.28038 | 2.05592  | 2.37483  |
| H | -1.33792 | 3.47722  | 2.44467  |
| H | -1.47746 | 2.32977  | 1.10696  |
| H | 4.01165  | 0.17277  | -1.48251 |

#### 4e\_conformer-023

|   |         |          |          |
|---|---------|----------|----------|
| C | 3.63683 | -1.26937 | 0.14805  |
| C | 1.73952 | -0.01335 | 0.09292  |
| N | 3.10809 | -0.03738 | -0.14089 |
| H | 3.65755 | 0.77778  | -0.37200 |
| C | 2.58152 | -2.06723 | 0.55383  |
| C | 5.09644 | -1.55891 | 0.01852  |
| H | 5.45715 | -1.39468 | -1.00493 |
| H | 5.70097 | -0.92651 | 0.68172  |

|   |          |          |          |
|---|----------|----------|----------|
| H | 5.29328  | -2.60188 | 0.28067  |
| C | 0.96116  | 1.19506  | -0.17313 |
| C | 1.40843  | 2.15323  | -1.10047 |
| C | -0.25621 | 1.42625  | 0.49915  |
| C | 0.65788  | 3.30513  | -1.34123 |
| H | 2.32236  | 1.98609  | -1.66160 |
| C | -1.01097 | 2.56893  | 0.23183  |
| H | -0.59296 | 0.71380  | 1.23738  |
| C | -0.55055 | 3.52270  | -0.68839 |
| H | 1.01442  | 4.03541  | -2.06232 |
| H | -1.15024 | 4.40700  | -0.87759 |
| O | -2.20740 | 2.84816  | 0.82890  |
| C | -2.75377 | 1.87600  | 1.71426  |
| H | -3.71680 | 2.27317  | 2.03767  |
| H | -2.90540 | 0.91545  | 1.20623  |
| H | -2.11072 | 1.72338  | 2.58944  |
| C | 1.38510  | -1.29381 | 0.53034  |
| C | 0.01544  | -1.83359 | 0.84754  |
| H | 0.12635  | -2.86391 | 1.20856  |
| H | -0.44350 | -1.28270 | 1.68028  |
| C | -0.95414 | -1.82850 | -0.34695 |
| H | -1.00341 | -0.81863 | -0.77130 |
| H | -0.54893 | -2.47643 | -1.13602 |
| C | -2.36496 | -2.28454 | 0.03034  |
| H | -2.32538 | -3.29997 | 0.45161  |
| H | -2.74989 | -1.63746 | 0.83334  |
| C | -3.34453 | -2.25911 | -1.14664 |
| H | -3.37664 | -1.24305 | -1.56459 |
| H | -2.96397 | -2.90763 | -1.94811 |
| C | -4.75837 | -2.69827 | -0.75811 |
| H | -5.17261 | -2.04510 | 0.01985  |
| H | -5.43886 | -2.66938 | -1.61671 |
| H | -4.75834 | -3.72230 | -0.36481 |
| H | 2.65521  | -3.10982 | 0.83713  |

#### 4e\_conformer-024

|   |          |         |          |
|---|----------|---------|----------|
| C | -0.15197 | 3.62902 | -0.21232 |
| C | -0.31211 | 1.41847 | 0.30329  |
| N | -0.99828 | 2.55497 | -0.10279 |
| H | -2.00371 | 2.61021 | -0.18160 |
| C | 1.11393  | 3.16832 | 0.10388  |
| C | -0.63772 | 4.98871 | -0.59522 |
| H | -1.13252 | 4.98565 | -1.57485 |
| H | -1.35771 | 5.38749 | 0.13134  |
| H | 0.20464  | 5.68377 | -0.64645 |



|   |          |          |          |
|---|----------|----------|----------|
| C | -1.01252 | 0.14468  | 0.46120  |
| C | -0.55714 | -0.83934 | 1.36402  |
| C | -2.17144 | -0.12363 | -0.28249 |
| C | -1.24515 | -2.03907 | 1.49628  |
| H | 0.31925  | -0.65132 | 1.97189  |
| C | -2.86725 | -1.32905 | -0.13268 |
| H | -2.54087 | 0.58447  | -1.01753 |
| C | -2.40456 | -2.30300 | 0.75945  |
| H | -0.88447 | -2.78770 | 2.19632  |
| H | -2.92307 | -3.24526 | 0.88536  |
| O | -3.97889 | -1.46453 | -0.91473 |
| C | -4.71480 | -2.67982 | -0.81981 |
| H | -5.10676 | -2.83138 | 0.19313  |
| H | -5.54568 | -2.58185 | -1.51969 |
| H | -4.09925 | -3.54248 | -1.10198 |
| C | 1.03008  | 1.78453  | 0.43519  |
| C | 2.21306  | 0.91006  | 0.75612  |
| H | 3.10266  | 1.54845  | 0.83095  |
| H | 2.10523  | 0.44048  | 1.74311  |
| C | 2.47657  | -0.18643 | -0.29019 |
| H | 1.57837  | -0.80694 | -0.39814 |
| H | 2.64436  | 0.28861  | -1.26648 |
| C | 3.66854  | -1.07722 | 0.06593  |
| H | 4.56968  | -0.45678 | 0.18145  |
| H | 3.49142  | -1.54334 | 1.04673  |
| C | 3.93703  | -2.17220 | -0.97103 |
| H | 3.03406  | -2.78818 | -1.08599 |
| H | 4.11562  | -1.70617 | -1.95022 |
| C | 5.12421  | -3.06611 | -0.60431 |
| H | 4.95594  | -3.56879 | 0.35611  |
| H | 5.29447  | -3.83970 | -1.36175 |
| H | 6.04583  | -2.47821 | -0.51277 |
| H | 2.01901  | 3.76290  | 0.09453  |

4e\_conformer-025

|   |          |         |          |
|---|----------|---------|----------|
| C | 0.15198  | 3.62901 | -0.21232 |
| C | 0.31211  | 1.41847 | 0.30329  |
| N | 0.99828  | 2.55497 | -0.10279 |
| H | 2.00371  | 2.61020 | -0.18161 |
| C | -1.11393 | 3.16831 | 0.10389  |
| C | 0.63772  | 4.98870 | -0.59522 |
| H | 1.35773  | 5.38748 | 0.13133  |
| H | 1.13251  | 4.98565 | -1.57485 |
| H | -0.20464 | 5.68377 | -0.64642 |
| C | 1.01253  | 0.14467 | 0.46120  |

|   |          |          |          |
|---|----------|----------|----------|
| C | 0.55713  | -0.83936 | 1.36400  |
| C | 2.17145  | -0.12363 | -0.28248 |
| C | 1.24515  | -2.03909 | 1.49626  |
| H | -0.31927 | -0.65135 | 1.97186  |
| C | 2.86726  | -1.32904 | -0.13267 |
| H | 2.54089  | 0.58448  | -1.01751 |
| C | 2.40456  | -2.30300 | 0.75944  |
| H | 0.88446  | -2.78773 | 2.19629  |
| H | 2.92308  | -3.24526 | 0.88535  |
| O | 3.97891  | -1.46452 | -0.91471 |
| C | 4.71482  | -2.67981 | -0.81981 |
| H | 4.09926  | -3.54246 | -1.10200 |
| H | 5.54570  | -2.58183 | -1.51968 |
| H | 5.10677  | -2.83139 | 0.19313  |
| C | -1.03008 | 1.78452  | 0.43519  |
| C | -2.21307 | 0.91006  | 0.75612  |
| H | -2.10523 | 0.44048  | 1.74312  |
| H | -3.10266 | 1.54845  | 0.83095  |
| C | -2.47658 | -0.18643 | -0.29019 |
| H | -2.64436 | 0.28861  | -1.26648 |
| H | -1.57838 | -0.80695 | -0.39813 |
| C | -3.66856 | -1.07721 | 0.06593  |
| H | -3.49144 | -1.54333 | 1.04674  |
| H | -4.56969 | -0.45677 | 0.18145  |
| C | -3.93705 | -2.17219 | -0.97102 |
| H | -4.11564 | -1.70616 | -1.95022 |
| H | -3.03408 | -2.78818 | -1.08598 |
| C | -5.12424 | -3.06609 | -0.60431 |
| H | -6.04585 | -2.47818 | -0.51278 |
| H | -5.29450 | -3.83968 | -1.36175 |
| H | -4.95598 | -3.56877 | 0.35611  |
| H | -2.01901 | 3.76290  | 0.09454  |

#### 4e\_conformer-026

|   |          |         |          |
|---|----------|---------|----------|
| C | 2.15732  | 2.26633 | -0.62767 |
| C | 0.23750  | 1.09642 | -0.27690 |
| N | 0.90709  | 2.29377 | -0.06382 |
| H | 0.48140  | 3.11474 | 0.34239  |
| C | 2.30712  | 1.01276 | -1.19424 |
| C | 3.07826  | 3.44128 | -0.57952 |
| H | 3.29724  | 3.74733 | 0.45146  |
| H | 4.02581  | 3.19100 | -1.06410 |
| H | 2.65802  | 4.31447 | -1.09552 |
| C | -1.10679 | 0.89255 | 0.25990  |
| C | -1.53016 | 1.56585 | 1.41900  |

|   |          |          |          |
|---|----------|----------|----------|
| C | -2.00849 | 0.02302  | -0.38548 |
| C | -2.82082 | 1.37041  | 1.91386  |
| H | -0.84333 | 2.21479  | 1.95329  |
| C | -3.28915 | -0.18124 | 0.13015  |
| H | -1.70037 | -0.46931 | -1.29671 |
| C | -3.70421 | 0.50032  | 1.28456  |
| H | -3.13557 | 1.89370  | 2.81246  |
| H | -4.70612 | 0.33086  | 1.66530  |
| O | -4.21341 | -1.01588 | -0.43034 |
| C | -3.82678 | -1.76241 | -1.57962 |
| H | -2.96269 | -2.40340 | -1.36627 |
| H | -4.68633 | -2.38275 | -1.83671 |
| H | -3.58762 | -1.10354 | -2.42312 |
| C | 1.10946  | 0.26724  | -0.98719 |
| C | 0.93014  | -1.17596 | -1.38276 |
| H | 0.08896  | -1.29893 | -2.07752 |
| H | 1.81883  | -1.48078 | -1.94722 |
| C | 0.72789  | -2.14136 | -0.19555 |
| H | -0.24868 | -1.94455 | 0.26176  |
| H | 0.68793  | -3.16724 | -0.58791 |
| C | 1.80822  | -2.04889 | 0.88884  |
| H | 1.79410  | -1.04046 | 1.32340  |
| H | 1.54920  | -2.73976 | 1.70365  |
| C | 3.22634  | -2.36377 | 0.40218  |
| H | 3.23493  | -3.35278 | -0.07826 |
| H | 3.51801  | -1.64233 | -0.37099 |
| C | 4.25706  | -2.33053 | 1.53338  |
| H | 4.01248  | -3.06320 | 2.31245  |
| H | 5.26562  | -2.55442 | 1.16726  |
| H | 4.28507  | -1.34137 | 2.00714  |
| H | 3.19334  | 0.65639  | -1.70436 |

4e\_conformer-027

|   |          |         |          |
|---|----------|---------|----------|
| C | -2.15728 | 2.26636 | -0.62767 |
| C | -0.23747 | 1.09643 | -0.27690 |
| N | -0.90705 | 2.29379 | -0.06383 |
| H | -0.48134 | 3.11475 | 0.34237  |
| C | -2.30710 | 1.01279 | -1.19422 |
| C | -3.07821 | 3.44132 | -0.57953 |
| H | -4.02576 | 3.19104 | -1.06409 |
| H | -3.29716 | 3.74740 | 0.45145  |
| H | -2.65796 | 4.31449 | -1.09555 |
| C | 1.10681  | 0.89254 | 0.25990  |
| C | 1.53020  | 1.56586 | 1.41898  |
| C | 2.00850  | 0.02299 | -0.38548 |

|   |          |          |          |
|---|----------|----------|----------|
| C | 2.82086  | 1.37040  | 1.91384  |
| H | 0.84339  | 2.21481  | 1.95327  |
| C | 3.28917  | -0.18127 | 0.13014  |
| H | 1.70037  | -0.46935 | -1.29670 |
| C | 3.70424  | 0.50029  | 1.28455  |
| H | 3.13563  | 1.89370  | 2.81243  |
| H | 4.70615  | 0.33082  | 1.66528  |
| O | 4.21341  | -1.01594 | -0.43034 |
| C | 3.82676  | -1.76248 | -1.57961 |
| H | 3.58761  | -1.10361 | -2.42311 |
| H | 4.68630  | -2.38283 | -1.83670 |
| H | 2.96266  | -2.40345 | -1.36625 |
| C | -1.10945 | 0.26725  | -0.98718 |
| C | -0.93015 | -1.17596 | -1.38273 |
| H | -1.81884 | -1.48077 | -1.94720 |
| H | -0.08896 | -1.29895 | -2.07747 |
| C | -0.72793 | -2.14134 | -0.19550 |
| H | -0.68797 | -3.16723 | -0.58786 |
| H | 0.24862  | -1.94453 | 0.26183  |
| C | -1.80830 | -2.04886 | 0.88886  |
| H | -1.79419 | -1.04043 | 1.32340  |
| H | -1.54929 | -2.73972 | 1.70368  |
| C | -3.22640 | -2.36375 | 0.40216  |
| H | -3.51804 | -1.64233 | -0.37103 |
| H | -3.23498 | -3.35277 | -0.07826 |
| C | -4.25716 | -2.33050 | 1.53333  |
| H | -4.28518 | -1.34132 | 2.00707  |
| H | -5.26570 | -2.55439 | 1.16718  |
| H | -4.01260 | -3.06315 | 2.31242  |
| H | -3.19333 | 0.65642  | -1.70433 |

#### 4e\_conformer-028

|   |          |          |          |
|---|----------|----------|----------|
| C | 3.27044  | -1.48578 | -0.19251 |
| C | 1.07445  | -0.90153 | -0.19530 |
| N | 2.00764  | -1.84363 | 0.21386  |
| H | 1.76859  | -2.73107 | 0.63303  |
| C | 3.15056  | -0.27366 | -0.84668 |
| C | 4.46219  | -2.34694 | 0.07168  |
| H | 4.60039  | -2.53546 | 1.14399  |
| H | 4.38122  | -3.32417 | -0.42219 |
| H | 5.36537  | -1.85755 | -0.30270 |
| C | -0.33825 | -1.04688 | 0.15881  |
| C | -0.70834 | -1.55745 | 1.42078  |
| C | -1.34967 | -0.68217 | -0.73871 |
| C | -2.05138 | -1.67715 | 1.75853  |

|   |          |          |          |
|---|----------|----------|----------|
| H | 0.05996  | -1.82534 | 2.13940  |
| C | -2.70012 | -0.78617 | -0.38330 |
| H | -1.10549 | -0.33131 | -1.73485 |
| C | -3.06134 | -1.28926 | 0.87228  |
| H | -2.32767 | -2.06512 | 2.73507  |
| H | -4.10013 | -1.38390 | 1.16321  |
| O | -3.58991 | -0.38774 | -1.33934 |
| C | -4.97837 | -0.48847 | -1.03987 |
| H | -5.24686 | 0.13307  | -0.17718 |
| H | -5.50234 | -0.12634 | -1.92533 |
| H | -5.26996 | -1.52702 | -0.84205 |
| C | 1.77269  | 0.10565  | -0.85733 |
| C | 1.24074  | 1.41856  | -1.36199 |
| H | 1.51111  | 1.55021  | -2.41880 |
| H | 0.14812  | 1.42146  | -1.32558 |
| C | 1.77437  | 2.63033  | -0.56980 |
| H | 2.86543  | 2.67757  | -0.68174 |
| H | 1.37922  | 3.54704  | -1.02636 |
| C | 1.43588  | 2.60188  | 0.92760  |
| H | 1.93535  | 1.73833  | 1.38494  |
| H | 1.86675  | 3.49701  | 1.39846  |
| C | -0.06295 | 2.53680  | 1.26096  |
| H | -0.48097 | 1.58887  | 0.90369  |
| H | -0.17244 | 2.52132  | 2.35375  |
| C | -0.88094 | 3.69926  | 0.69076  |
| H | -1.92477 | 3.64637  | 1.02084  |
| H | -0.47508 | 4.66598  | 1.01503  |
| H | -0.88212 | 3.69284  | -0.40516 |
| H | 3.97230  | 0.29245  | -1.26725 |

#### 4e\_conformer-029

|   |         |          |          |
|---|---------|----------|----------|
| C | 1.95397 | 3.19771  | -0.23256 |
| C | 1.38080 | 1.01837  | 0.06995  |
| N | 2.38419 | 1.89649  | -0.31633 |
| H | 3.26678 | 1.61017  | -0.71495 |
| C | 0.65647 | 3.15872  | 0.24526  |
| C | 2.82343 | 4.34732  | -0.62483 |
| H | 3.75534 | 4.37190  | -0.04565 |
| H | 3.10139 | 4.30838  | -1.68621 |
| H | 2.29547 | 5.28903  | -0.45231 |
| C | 1.61379 | -0.42445 | 0.09370  |
| C | 2.90505 | -0.93974 | 0.34168  |
| C | 0.56966 | -1.33089 | -0.13535 |
| C | 3.12040 | -2.31236 | 0.35640  |
| H | 3.72709 | -0.26299 | 0.55307  |

|   |          |          |          |
|---|----------|----------|----------|
| C | 0.79165  | -2.71281 | -0.10075 |
| H | -0.42754 | -0.98271 | -0.37444 |
| C | 2.07472  | -3.21641 | 0.14200  |
| H | 4.11766  | -2.69680 | 0.55188  |
| H | 2.26787  | -4.28167 | 0.16513  |
| O | -0.30939 | -3.48672 | -0.33462 |
| C | -0.14064 | -4.90047 | -0.33758 |
| H | 0.21201  | -5.26285 | 0.63557  |
| H | -1.12627 | -5.31904 | -0.54522 |
| H | 0.56242  | -5.21713 | -1.11748 |
| C | 0.28338  | 1.79552  | 0.44059  |
| C | -1.03890 | 1.32368  | 0.97444  |
| H | -0.92754 | 0.33350  | 1.43297  |
| H | -1.36823 | 1.99932  | 1.77556  |
| C | -2.14657 | 1.26266  | -0.09311 |
| H | -2.28878 | 2.26592  | -0.51782 |
| H | -1.81519 | 0.62710  | -0.92624 |
| C | -3.47558 | 0.73741  | 0.45383  |
| H | -3.32159 | -0.26715 | 0.87519  |
| H | -3.80188 | 1.37239  | 1.29073  |
| C | -4.58562 | 0.67806  | -0.59993 |
| H | -4.74002 | 1.68235  | -1.01877 |
| H | -4.25543 | 0.04557  | -1.43591 |
| C | -5.90874 | 0.14457  | -0.04515 |
| H | -5.78782 | -0.87116 | 0.35112  |
| H | -6.27604 | 0.77700  | 0.77245  |
| H | -6.68506 | 0.11220  | -0.81806 |
| H | 0.03755  | 4.02369  | 0.44905  |

4e\_conformer-030

|   |          |          |          |
|---|----------|----------|----------|
| C | -1.95539 | 3.19686  | -0.23253 |
| C | -1.38119 | 1.01778  | 0.06993  |
| N | -2.38496 | 1.89542  | -0.31640 |
| H | -3.26724 | 1.60861  | -0.71535 |
| C | -0.65792 | 3.15848  | 0.24540  |
| C | -2.82541 | 4.34607  | -0.62476 |
| H | -3.10358 | 4.30687  | -1.68607 |
| H | -3.75721 | 4.37037  | -0.04538 |
| H | -2.29778 | 5.28801  | -0.45250 |
| C | -1.61355 | -0.42513 | 0.09364  |
| C | -2.90463 | -0.94097 | 0.34142  |
| C | -0.56900 | -1.33113 | -0.13523 |
| C | -3.11939 | -2.31369 | 0.35614  |
| H | -3.72701 | -0.26459 | 0.55266  |
| C | -0.79041 | -2.71314 | -0.10069 |

|   |          |          |          |
|---|----------|----------|----------|
| H | 0.42810  | -0.98253 | -0.37413 |
| C | -2.07329 | -3.21730 | 0.14190  |
| H | -4.11651 | -2.69854 | 0.55149  |
| H | -2.26599 | -4.28264 | 0.16502  |
| O | 0.31100  | -3.48656 | -0.33446 |
| C | 0.14286  | -4.90038 | -0.33738 |
| H | -0.20956 | -5.26288 | 0.63580  |
| H | -0.56012 | -5.21735 | -1.11722 |
| H | 1.12866  | -5.31853 | -0.54509 |
| C | -0.28417 | 1.79545  | 0.44070  |
| C | 1.03830  | 1.32416  | 0.97454  |
| H | 1.36725  | 1.99976  | 1.77586  |
| H | 0.92738  | 0.33381  | 1.43283  |
| C | 2.14608  | 1.26394  | -0.09296 |
| H | 1.81492  | 0.62872  | -0.92644 |
| H | 2.28808  | 2.26745  | -0.51714 |
| C | 3.47518  | 0.73873  | 0.45379  |
| H | 3.80128  | 1.37333  | 1.29105  |
| H | 3.32141  | -0.26609 | 0.87460  |
| C | 4.58528  | 0.68022  | -0.59995 |
| H | 4.25526  | 0.04813  | -1.43630 |
| H | 4.73948  | 1.68478  | -1.01821 |
| C | 5.90850  | 0.14668  | -0.04543 |
| H | 6.27562  | 0.77870  | 0.77257  |
| H | 5.78778  | -0.86931 | 0.35022  |
| H | 6.68485  | 0.11495  | -0.81833 |
| H | -0.03945 | 4.02374  | 0.44931  |

4e\_conformer-031

|   |          |          |          |
|---|----------|----------|----------|
| C | 1.80113  | 3.15762  | 0.19934  |
| C | 1.36207  | 0.94229  | -0.06431 |
| N | 2.34309  | 1.89655  | 0.16722  |
| H | 3.30267  | 1.67963  | 0.39539  |
| C | 0.44691  | 3.01586  | -0.04509 |
| C | 2.62999  | 4.37100  | 0.46806  |
| H | 3.09599  | 4.33796  | 1.46157  |
| H | 3.43774  | 4.48574  | -0.26604 |
| H | 2.00447  | 5.26650  | 0.42219  |
| C | 1.70150  | -0.47504 | -0.17229 |
| C | 2.96359  | -0.88080 | -0.64097 |
| C | 0.76805  | -1.46302 | 0.20023  |
| C | 3.27618  | -2.23791 | -0.73254 |
| H | 3.68760  | -0.13903 | -0.96346 |
| C | 1.08378  | -2.81791 | 0.08336  |
| H | -0.18395 | -1.15873 | 0.60877  |

|   |          |          |          |
|---|----------|----------|----------|
| C | 2.34754  | -3.21207 | -0.38052 |
| H | 4.25379  | -2.53980 | -1.09800 |
| H | 2.57543  | -4.27035 | -0.45581 |
| O | 0.22857  | -3.83000 | 0.41436  |
| C | -1.07746 | -3.47986 | 0.86108  |
| H | -1.04152 | -2.90470 | 1.79417  |
| H | -1.61635 | -2.90020 | 0.10162  |
| H | -1.59699 | -4.42277 | 1.03615  |
| C | 0.15647  | 1.62930  | -0.21317 |
| C | -1.19788 | 1.05743  | -0.52335 |
| H | -1.71482 | 1.72694  | -1.22129 |
| H | -1.09230 | 0.09559  | -1.04062 |
| C | -2.07831 | 0.86094  | 0.72713  |
| H | -1.51081 | 0.29460  | 1.47746  |
| H | -2.27699 | 1.84234  | 1.17961  |
| C | -3.40310 | 0.14006  | 0.44899  |
| H | -3.19257 | -0.84993 | 0.01664  |
| H | -3.91325 | -0.04715 | 1.40430  |
| C | -4.35765 | 0.89920  | -0.47965 |
| H | -4.53176 | 1.90485  | -0.07105 |
| H | -3.88701 | 1.04409  | -1.46035 |
| C | -5.69613 | 0.17958  | -0.66402 |
| H | -6.36374 | 0.73650  | -1.33120 |
| H | -5.54903 | -0.81862 | -1.09468 |
| H | -6.21055 | 0.05265  | 0.29651  |
| H | -0.26638 | 3.82803  | -0.11098 |

4e\_conformer-032

|   |          |          |          |
|---|----------|----------|----------|
| C | -0.19531 | 3.53681  | 0.02730  |
| C | 0.18207  | 1.29472  | 0.01719  |
| N | 0.74104  | 2.54990  | 0.21373  |
| H | 1.67741  | 2.70622  | 0.55830  |
| C | -1.37515 | 2.90587  | -0.32400 |
| C | 0.12883  | 4.98333  | 0.21170  |
| H | -0.74992 | 5.59328  | -0.01431 |
| H | 0.43642  | 5.20708  | 1.24157  |
| H | 0.94351  | 5.30759  | -0.44836 |
| C | 0.99221  | 0.08291  | 0.12903  |
| C | 0.42999  | -1.14191 | 0.54685  |
| C | 2.36183  | 0.11707  | -0.17267 |
| C | 1.22358  | -2.27941 | 0.63798  |
| H | -0.61458 | -1.19059 | 0.82731  |
| C | 3.15762  | -1.02889 | -0.06094 |
| H | 2.83157  | 1.02829  | -0.52957 |
| C | 2.58958  | -2.24375 | 0.34089  |



|   |          |          |          |
|---|----------|----------|----------|
| H | 0.77914  | -3.21640 | 0.96231  |
| H | 3.18547  | -3.14385 | 0.42671  |
| O | 4.47474  | -0.86166 | -0.38138 |
| C | 5.32740  | -1.99973 | -0.30772 |
| H | 6.31771  | -1.65108 | -0.60355 |
| H | 5.37125  | -2.40081 | 0.71199  |
| H | 4.99854  | -2.79009 | -0.99317 |
| C | -1.15245 | 1.49667  | -0.33508 |
| C | -2.17389 | 0.45514  | -0.69255 |
| H | -2.77834 | 0.81180  | -1.53791 |
| H | -1.66874 | -0.45293 | -1.03742 |
| C | -3.12732 | 0.11581  | 0.46991  |
| H | -2.53810 | -0.18437 | 1.34790  |
| H | -3.65572 | 1.03276  | 0.76151  |
| C | -4.14561 | -0.98280 | 0.13925  |
| H | -4.88799 | -1.03686 | 0.94778  |
| H | -4.70154 | -0.70402 | -0.76825 |
| C | -3.52875 | -2.37401 | -0.05211 |
| H | -2.80647 | -2.35435 | -0.87809 |
| H | -2.95633 | -2.63812 | 0.84872  |
| C | -4.57861 | -3.45358 | -0.32680 |
| H | -5.14487 | -3.22752 | -1.23874 |
| H | -4.11745 | -4.43941 | -0.45517 |
| H | -5.29669 | -3.52376 | 0.49951  |
| H | -2.30555 | 3.40559  | -0.56353 |

#### 4e\_conformer-033

|   |          |          |          |
|---|----------|----------|----------|
| C | 0.19529  | 3.53681  | 0.02729  |
| C | -0.18208 | 1.29470  | 0.01719  |
| N | -0.74106 | 2.54989  | 0.21373  |
| H | -1.67743 | 2.70620  | 0.55829  |
| C | 1.37513  | 2.90587  | -0.32399 |
| C | -0.12886 | 4.98332  | 0.21169  |
| H | -0.94355 | 5.30757  | -0.44835 |
| H | -0.43644 | 5.20707  | 1.24156  |
| H | 0.74989  | 5.59328  | -0.01433 |
| C | -0.99222 | 0.08290  | 0.12903  |
| C | -0.43000 | -1.14192 | 0.54687  |
| C | -2.36184 | 0.11705  | -0.17268 |
| C | -1.22359 | -2.27941 | 0.63800  |
| H | 0.61457  | -1.19059 | 0.82734  |
| C | -3.15762 | -1.02890 | -0.06094 |
| H | -2.83157 | 1.02828  | -0.52958 |
| C | -2.58959 | -2.24376 | 0.34090  |
| H | -0.77916 | -3.21640 | 0.96234  |

|   |          |          |          |
|---|----------|----------|----------|
| H | -3.18548 | -3.14386 | 0.42673  |
| O | -4.47474 | -0.86167 | -0.38140 |
| C | -5.32740 | -1.99974 | -0.30773 |
| H | -5.37126 | -2.40081 | 0.71198  |
| H | -6.31771 | -1.65109 | -0.60357 |
| H | -4.99854 | -2.79011 | -0.99317 |
| C | 1.15244  | 1.49667  | -0.33508 |
| C | 2.17389  | 0.45514  | -0.69254 |
| H | 1.66876  | -0.45293 | -1.03743 |
| H | 2.77836  | 0.81182  | -1.53790 |
| C | 3.12731  | 0.11582  | 0.46993  |
| H | 3.65569  | 1.03277  | 0.76155  |
| H | 2.53808  | -0.18439 | 1.34790  |
| C | 4.14562  | -0.98277 | 0.13926  |
| H | 4.70157  | -0.70397 | -0.76822 |
| H | 4.88799  | -1.03683 | 0.94781  |
| C | 3.52880  | -2.37399 | -0.05213 |
| H | 2.95636  | -2.63813 | 0.84869  |
| H | 2.80653  | -2.35433 | -0.87813 |
| C | 4.57868  | -3.45353 | -0.32682 |
| H | 5.29674  | -3.52372 | 0.49950  |
| H | 4.11753  | -4.43937 | -0.45522 |
| H | 5.14495  | -3.22745 | -1.23875 |
| H | 2.30553  | 3.40559  | -0.56353 |

#### 4e\_conformer-034

|   |          |          |          |
|---|----------|----------|----------|
| C | -2.52947 | -2.27046 | -0.19430 |
| C | -0.53479 | -1.18219 | -0.10667 |
| N | -1.30483 | -2.20689 | 0.42479  |
| H | -0.95692 | -2.88994 | 1.08281  |
| C | -2.55881 | -1.24463 | -1.12095 |
| C | -3.53971 | -3.31612 | 0.14865  |
| H | -3.17306 | -4.32865 | -0.06536 |
| H | -3.81306 | -3.28758 | 1.21119  |
| H | -4.44990 | -3.16011 | -0.43670 |
| C | 0.79515  | -0.89604 | 0.43537  |
| C | 1.04549  | -1.02794 | 1.81113  |
| C | 1.84422  | -0.49304 | -0.41310 |
| C | 2.31519  | -0.75236 | 2.32288  |
| H | 0.24057  | -1.31426 | 2.48095  |
| C | 3.10430  | -0.19901 | 0.11199  |
| H | 1.66564  | -0.44213 | -1.47823 |
| C | 3.34478  | -0.33220 | 1.48828  |
| H | 2.49891  | -0.85276 | 3.38896  |
| H | 4.33349  | -0.10494 | 1.87356  |

|   |          |          |          |
|---|----------|----------|----------|
| O | 4.17007  | 0.20725  | -0.63849 |
| C | 3.97088  | 0.38873  | -2.03664 |
| H | 3.19174  | 1.13496  | -2.23436 |
| H | 4.92390  | 0.74344  | -2.43118 |
| H | 3.70110  | -0.55382 | -2.52815 |
| C | -1.30963 | -0.55340 | -1.08035 |
| C | -1.01312 | 0.70793  | -1.84624 |
| H | 0.06366  | 0.84006  | -1.99012 |
| H | -1.45057 | 0.62341  | -2.84937 |
| C | -1.57455 | 1.97568  | -1.16832 |
| H | -1.44772 | 2.82786  | -1.85143 |
| H | -2.65465 | 1.84743  | -1.02356 |
| C | -0.89682 | 2.29729  | 0.16726  |
| H | -1.03111 | 1.45199  | 0.85456  |
| H | 0.18597  | 2.38145  | -0.00022 |
| C | -1.40463 | 3.58133  | 0.83763  |
| H | -0.77639 | 3.79429  | 1.71290  |
| H | -1.26981 | 4.42904  | 0.15061  |
| C | -2.86954 | 3.51250  | 1.28197  |
| H | -3.54706 | 3.38907  | 0.43000  |
| H | -3.03187 | 2.66462  | 1.95940  |
| H | -3.16664 | 4.42537  | 1.81072  |
| H | -3.39668 | -1.00504 | -1.76410 |

4e\_conformer-035

|   |          |          |          |
|---|----------|----------|----------|
| C | 2.53035  | -2.26979 | -0.19415 |
| C | 0.53536  | -1.18209 | -0.10664 |
| N | 1.30568  | -2.20654 | 0.42489  |
| H | 0.95795  | -2.88963 | 1.08296  |
| C | 2.55941  | -1.24400 | -1.12087 |
| C | 3.54089  | -3.31513 | 0.14888  |
| H | 3.17454  | -4.32778 | -0.06506 |
| H | 4.45104  | -3.15890 | -0.43647 |
| H | 3.81422  | -3.28644 | 1.21142  |
| C | -0.79468 | -0.89629 | 0.43537  |
| C | -1.04501 | -1.02822 | 1.81112  |
| C | -1.84384 | -0.49359 | -0.41314 |
| C | -2.31480 | -0.75297 | 2.32283  |
| H | -0.24003 | -1.31431 | 2.48096  |
| C | -3.10401 | -0.19989 | 0.11192  |
| H | -1.66525 | -0.44266 | -1.47826 |
| C | -3.34448 | -0.33311 | 1.48821  |
| H | -2.49851 | -0.85339 | 3.38892  |
| H | -4.33326 | -0.10610 | 1.87347  |
| O | -4.16987 | 0.20606  | -0.63860 |

|   |          |          |          |
|---|----------|----------|----------|
| C | -3.97070 | 0.38756  | -2.03674 |
| H | -3.19176 | 1.13400  | -2.23446 |
| H | -3.70065 | -0.55493 | -2.52822 |
| H | -4.92381 | 0.74200  | -2.43131 |
| C | 1.31004  | -0.55313 | -1.08035 |
| C | 1.01318  | 0.70805  | -1.84634 |
| H | 1.45098  | 0.62370  | -2.84934 |
| H | -0.06361 | 0.83969  | -1.99056 |
| C | 1.57383  | 1.97609  | -1.16830 |
| H | 2.65395  | 1.84834  | -1.02323 |
| H | 1.44680  | 2.82818  | -1.85148 |
| C | 0.89557  | 2.29744  | 0.16708  |
| H | -0.18722 | 2.38102  | -0.00070 |
| H | 1.03012  | 1.45227  | 0.85447  |
| C | 1.40253  | 3.58180  | 0.83748  |
| H | 1.26745  | 4.42939  | 0.15036  |
| H | 0.77396  | 3.79449  | 1.71257  |
| C | 2.86736  | 3.51377  | 1.28220  |
| H | 3.54517  | 3.39063  | 0.43042  |
| H | 3.16385  | 4.42684  | 1.81097  |
| H | 3.02997  | 2.66603  | 1.95975  |
| H | 3.39722  | -1.00421 | -1.76401 |

4e\_conformer-036

|   |          |          |          |
|---|----------|----------|----------|
| C | -1.86151 | -2.80934 | -0.47310 |
| C | -0.44890 | -1.26166 | 0.40814  |
| N | -0.55231 | -2.40483 | -0.37123 |
| H | 0.24102  | -2.93565 | -0.70197 |
| C | -2.61765 | -1.88850 | 0.22823  |
| C | -2.25462 | -4.04497 | -1.21496 |
| H | -3.34193 | -4.15860 | -1.19876 |
| H | -1.93473 | -4.01087 | -2.26426 |
| H | -1.81657 | -4.94855 | -0.77103 |
| C | 0.84982  | -0.61926 | 0.62220  |
| C | 1.19212  | -0.04854 | 1.86473  |
| C | 1.78878  | -0.57306 | -0.41704 |
| C | 2.42936  | 0.56223  | 2.03352  |
| H | 0.49945  | -0.11445 | 2.69589  |
| C | 3.04003  | 0.02868  | -0.23432 |
| H | 1.55243  | -0.97931 | -1.39557 |
| C | 3.36658  | 0.61043  | 0.99618  |
| H | 2.68548  | 0.99896  | 2.99486  |
| H | 4.32523  | 1.08794  | 1.15668  |
| O | 3.86518  | 0.00918  | -1.32217 |
| C | 5.14235  | 0.62706  | -1.19997 |

|   |          |          |          |
|---|----------|----------|----------|
| H | 5.62830  | 0.50342  | -2.16863 |
| H | 5.04851  | 1.69565  | -0.97208 |
| H | 5.74745  | 0.14350  | -0.42367 |
| C | -1.74162 | -0.91025 | 0.79097  |
| C | -2.19350 | 0.33390  | 1.50518  |
| H | -2.98079 | 0.07231  | 2.22434  |
| H | -1.37385 | 0.76632  | 2.08718  |
| C | -2.73679 | 1.41752  | 0.54943  |
| H | -3.56071 | 0.99515  | -0.04307 |
| H | -3.16683 | 2.22765  | 1.15201  |
| C | -1.66751 | 1.97620  | -0.39442 |
| H | -0.86677 | 2.43766  | 0.20261  |
| H | -1.20189 | 1.14130  | -0.93233 |
| C | -2.19511 | 2.99670  | -1.41216 |
| H | -1.38556 | 3.25043  | -2.10963 |
| H | -2.98366 | 2.52655  | -2.01709 |
| C | -2.73482 | 4.28639  | -0.78517 |
| H | -1.97000 | 4.76761  | -0.16248 |
| H | -3.03906 | 5.00420  | -1.55555 |
| H | -3.60640 | 4.09489  | -0.14967 |
| H | -3.69633 | -1.90692 | 0.32352  |

4e\_conformer-037

|   |          |          |          |
|---|----------|----------|----------|
| C | 3.60807  | -0.74301 | -0.37874 |
| C | 1.38645  | -0.75537 | 0.10413  |
| N | 2.43604  | -1.45213 | -0.47862 |
| H | 2.32137  | -2.29991 | -1.01553 |
| C | 3.31327  | 0.41751  | 0.31145  |
| C | 4.88971  | -1.24272 | -0.96124 |
| H | 5.16769  | -2.22412 | -0.55629 |
| H | 4.83191  | -1.34606 | -2.05274 |
| H | 5.69920  | -0.54365 | -0.73458 |
| C | 0.04246  | -1.33478 | 0.13381  |
| C | -0.14020 | -2.72656 | 0.28016  |
| C | -1.09035 | -0.52546 | -0.00371 |
| C | -1.42248 | -3.26383 | 0.29199  |
| H | 0.72079  | -3.37468 | 0.41158  |
| C | -2.37872 | -1.07040 | 0.02754  |
| H | -0.98834 | 0.53698  | -0.16847 |
| C | -2.55533 | -2.45122 | 0.17269  |
| H | -1.55389 | -4.33600 | 0.40910  |
| H | -3.54296 | -2.89517 | 0.19113  |
| O | -3.39587 | -0.16927 | -0.11210 |
| C | -4.73003 | -0.66611 | -0.12049 |
| H | -5.37260 | 0.20577  | -0.24916 |

|   |          |          |          |
|---|----------|----------|----------|
| H | -4.89063 | -1.36449 | -0.95069 |
| H | -4.97626 | -1.16504 | 0.82456  |
| C | 1.91826  | 0.42435  | 0.62304  |
| C | 1.23702  | 1.48412  | 1.44761  |
| H | 0.21856  | 1.17158  | 1.70148  |
| H | 1.77077  | 1.58153  | 2.40315  |
| C | 1.21489  | 2.87359  | 0.77303  |
| H | 0.95155  | 3.63185  | 1.52337  |
| H | 2.23369  | 3.10930  | 0.44085  |
| C | 0.24645  | 2.98332  | -0.41325 |
| H | 0.53007  | 3.83661  | -1.04395 |
| H | 0.35272  | 2.09213  | -1.04834 |
| C | -1.21925 | 3.15990  | 0.00713  |
| H | -1.49775 | 2.39532  | 0.74407  |
| H | -1.32189 | 4.12405  | 0.52379  |
| C | -2.19326 | 3.09732  | -1.17162 |
| H | -3.22442 | 3.27991  | -0.84872 |
| H | -1.94025 | 3.84651  | -1.93193 |
| H | -2.16741 | 2.11145  | -1.65028 |
| H | 4.03096  | 1.18136  | 0.58362  |

#### 4e\_conformer-038

|   |          |          |          |
|---|----------|----------|----------|
| C | -3.60859 | -0.74179 | -0.37879 |
| C | -1.38700 | -0.75492 | 0.10422  |
| N | -2.43683 | -1.45142 | -0.47838 |
| H | -2.32242 | -2.29928 | -1.01523 |
| C | -3.31334 | 0.41879  | 0.31111  |
| C | -4.89038 | -1.24115 | -0.96128 |
| H | -5.69969 | -0.54184 | -0.73468 |
| H | -4.83260 | -1.34455 | -2.05276 |
| H | -5.16865 | -2.22243 | -0.55628 |
| C | -0.04321 | -1.33479 | 0.13403  |
| C | 0.13905  | -2.72659 | 0.28054  |
| C | 1.08981  | -0.52582 | -0.00374 |
| C | 1.42118  | -3.26423 | 0.29236  |
| H | -0.72211 | -3.37446 | 0.41208  |
| C | 2.37802  | -1.07109 | 0.02747  |
| H | 0.98806  | 0.53660  | -0.16868 |
| C | 2.55424  | -2.45194 | 0.17283  |
| H | 1.55230  | -4.33641 | 0.40961  |
| H | 3.54174  | -2.89618 | 0.19125  |
| O | 3.39539  | -0.17023 | -0.11245 |
| C | 4.72943  | -0.66738 | -0.12095 |
| H | 4.97570  | -1.16617 | 0.82416  |
| H | 4.88975  | -1.36596 | -0.95102 |

|   |          |         |          |
|---|----------|---------|----------|
| H | 5.37224  | 0.20428 | -0.24989 |
| C | -1.91836 | 0.42516 | 0.62280  |
| C | -1.23677 | 1.48479 | 1.44728  |
| H | -1.77083 | 1.58276 | 2.40258  |
| H | -0.21860 | 1.17176 | 1.70165  |
| C | -1.21353 | 2.87409 | 0.77237  |
| H | -2.23204 | 3.11034 | 0.43970  |
| H | -0.95009 | 3.63234 | 1.52267  |
| C | -0.24447 | 2.98309 | -0.41350 |
| H | -0.35096 | 2.09192 | -1.04856 |
| H | -0.52733 | 3.83648 | -1.04441 |
| C | 1.22114  | 3.15893 | 0.00756  |
| H | 1.32395  | 4.12292 | 0.52446  |
| H | 1.49897  | 2.39406 | 0.74446  |
| C | 2.19574  | 3.09620 | -1.17070 |
| H | 1.94331  | 3.84555 | -1.93105 |
| H | 3.22675  | 3.27854 | -0.84720 |
| H | 2.17002  | 2.11037 | -1.64942 |
| H | -4.03073 | 1.18299 | 0.58308  |

4e\_conformer-039

|   |          |          |          |
|---|----------|----------|----------|
| C | -2.28033 | 2.27340  | -0.43987 |
| C | -0.34958 | 1.08094  | -0.27499 |
| N | -1.00348 | 2.25856  | 0.06170  |
| H | -0.55419 | 3.04742  | 0.50451  |
| C | -2.46239 | 1.06604  | -1.09115 |
| C | -3.19376 | 3.44118  | -0.25782 |
| H | -3.35444 | 3.67324  | 0.80275  |
| H | -2.80047 | 4.34923  | -0.73337 |
| H | -4.16741 | 3.22480  | -0.70561 |
| C | 1.01875  | 0.83788  | 0.17898  |
| C | 1.49297  | 1.41612  | 1.37645  |
| C | 1.89635  | 0.03842  | -0.56531 |
| C | 2.79901  | 1.18926  | 1.79441  |
| H | 0.82733  | 2.01319  | 1.99198  |
| C | 3.20501  | -0.19800 | -0.12981 |
| H | 1.58507  | -0.40101 | -1.50538 |
| C | 3.67026  | 0.38187  | 1.05671  |
| H | 3.15069  | 1.63570  | 2.72044  |
| H | 4.68063  | 0.21442  | 1.40833  |
| O | 3.95627  | -0.99855 | -0.94272 |
| C | 5.30314  | -1.25808 | -0.56100 |
| H | 5.88843  | -0.33220 | -0.50647 |
| H | 5.35224  | -1.77415 | 0.40542  |
| H | 5.71536  | -1.90309 | -1.33806 |

|   |          |          |          |
|---|----------|----------|----------|
| C | -1.25832 | 0.30772  | -1.00080 |
| C | -1.10083 | -1.10309 | -1.50553 |
| H | -2.00934 | -1.36563 | -2.05965 |
| H | -0.28290 | -1.17772 | -2.23351 |
| C | -0.86281 | -2.14745 | -0.39416 |
| H | -0.83416 | -3.14443 | -0.85581 |
| H | 0.12725  | -1.97870 | 0.04531  |
| C | -1.91018 | -2.13081 | 0.72589  |
| H | -1.62350 | -2.86964 | 1.48764  |
| H | -1.88824 | -1.15132 | 1.22212  |
| C | -3.34075 | -2.42446 | 0.26289  |
| H | -3.65853 | -1.66002 | -0.45686 |
| H | -3.35927 | -3.38292 | -0.27565 |
| C | -4.33773 | -2.46529 | 1.42370  |
| H | -4.06674 | -3.24137 | 2.15023  |
| H | -4.35639 | -1.50625 | 1.95621  |
| H | -5.35561 | -2.67358 | 1.07457  |
| H | -3.37444 | 0.74854  | -1.58100 |

4e\_conformer-040

|   |          |          |          |
|---|----------|----------|----------|
| C | 3.89347  | -0.37588 | -0.20683 |
| C | 1.62381  | -0.49953 | -0.14613 |
| N | 2.81381  | -1.19693 | 0.00408  |
| H | 2.87161  | -2.19766 | 0.12911  |
| C | 3.38690  | 0.88526  | -0.46947 |
| C | 5.29847  | -0.88012 | -0.15121 |
| H | 5.53187  | -1.33557 | 0.81968  |
| H | 5.49453  | -1.63791 | -0.92114 |
| H | 5.99652  | -0.05395 | -0.31106 |
| C | 0.33487  | -1.15518 | 0.07089  |
| C | 0.20769  | -2.21086 | 0.99950  |
| C | -0.80616 | -0.74712 | -0.63123 |
| C | -1.02803 | -2.81164 | 1.20964  |
| H | 1.06884  | -2.52978 | 1.57854  |
| C | -2.04996 | -1.34449 | -0.40168 |
| H | -0.74948 | 0.03591  | -1.37653 |
| C | -2.17124 | -2.38745 | 0.52409  |
| H | -1.11629 | -3.61790 | 1.93260  |
| H | -3.12455 | -2.86415 | 0.71546  |
| O | -3.08307 | -0.84356 | -1.14143 |
| C | -4.38505 | -1.36867 | -0.90595 |
| H | -4.43381 | -2.43879 | -1.14082 |
| H | -4.69436 | -1.21097 | 0.13417  |
| H | -5.05343 | -0.82053 | -1.57114 |
| C | 1.96315  | 0.82294  | -0.43884 |



|   |          |         |          |
|---|----------|---------|----------|
| C | 1.03697  | 2.00219 | -0.57184 |
| H | 1.61823  | 2.87052 | -0.90709 |
| H | 0.28985  | 1.82925 | -1.35469 |
| C | 0.32390  | 2.36413 | 0.74667  |
| H | -0.10495 | 1.45593 | 1.18461  |
| H | 1.08051  | 2.71791 | 1.45867  |
| C | -0.77065 | 3.42848 | 0.57589  |
| H | -1.01581 | 3.85792 | 1.55737  |
| H | -0.37104 | 4.25529 | -0.02831 |
| C | -2.06881 | 2.90743 | -0.06452 |
| H | -2.69416 | 3.76512 | -0.34552 |
| H | -1.83963 | 2.38174 | -1.00094 |
| C | -2.87477 | 1.98123 | 0.85195  |
| H | -2.30038 | 1.09334 | 1.13360  |
| H | -3.16517 | 2.50208 | 1.77305  |
| H | -3.78738 | 1.63280 | 0.35650  |
| H | 3.97901  | 1.77210 | -0.65872 |

4e\_conformer-041

|   |          |          |          |
|---|----------|----------|----------|
| C | -3.89346 | -0.37600 | -0.20689 |
| C | -1.62382 | -0.49950 | -0.14606 |
| N | -2.81377 | -1.19697 | 0.00412  |
| H | -2.87151 | -2.19770 | 0.12921  |
| C | -3.38696 | 0.88516  | -0.46958 |
| C | -5.29844 | -0.88032 | -0.15131 |
| H | -5.49443 | -1.63812 | -0.92124 |
| H | -5.53185 | -1.33577 | 0.81958  |
| H | -5.99653 | -0.05418 | -0.31119 |
| C | -0.33483 | -1.15507 | 0.07099  |
| C | -0.20751 | -2.21053 | 0.99982  |
| C | 0.80608  | -0.74711 | -0.63136 |
| C | 1.02828  | -2.81118 | 1.20998  |
| H | -1.06858 | -2.52938 | 1.57902  |
| C | 2.04995  | -1.34435 | -0.40180 |
| H | 0.74926  | 0.03574  | -1.37684 |
| C | 2.17139  | -2.38707 | 0.52421  |
| H | 1.11666  | -3.61727 | 1.93312  |
| H | 3.12474  | -2.86368 | 0.71559  |
| O | 3.08295  | -0.84354 | -1.14179 |
| C | 4.38500  | -1.36848 | -0.90628 |
| H | 4.43383  | -2.43865 | -1.14089 |
| H | 5.05327  | -0.82044 | -1.57165 |
| H | 4.69437  | -1.21050 | 0.13378  |
| C | -1.96320 | 0.82292  | -0.43885 |
| C | -1.03707 | 2.00222  | -0.57185 |

|   |          |         |          |
|---|----------|---------|----------|
| H | -0.28997 | 1.82932 | -1.35472 |
| H | -1.61836 | 2.87053 | -0.90706 |
| C | -0.32398 | 2.36417 | 0.74667  |
| H | -1.08057 | 2.71811 | 1.45861  |
| H | 0.10472  | 1.45594 | 1.18470  |
| C | 0.77074  | 3.42833 | 0.57585  |
| H | 0.37129  | 4.25515 | -0.02843 |
| H | 1.01592  | 3.85780 | 1.55732  |
| C | 2.06886  | 2.90703 | -0.06443 |
| H | 1.83968  | 2.38133 | -1.00084 |
| H | 2.69439  | 3.76459 | -0.34541 |
| C | 2.87456  | 1.98073 | 0.85217  |
| H | 3.16490  | 2.50155 | 1.77331  |
| H | 2.30001  | 1.09292 | 1.13375  |
| H | 3.78719  | 1.63217 | 0.35686  |
| H | -3.97911 | 1.77195 | -0.65890 |

#### 4e\_conformer-042

|   |          |          |          |
|---|----------|----------|----------|
| C | -3.86440 | 0.26074  | -0.15755 |
| C | -1.69934 | -0.39473 | 0.06548  |
| N | -2.99943 | -0.80529 | -0.19292 |
| H | -3.25321 | -1.73966 | -0.47996 |
| C | -3.10988 | 1.37673  | 0.15828  |
| C | -5.32401 | 0.10719  | -0.43590 |
| H | -5.80053 | -0.59973 | 0.25531  |
| H | -5.82665 | 1.07220  | -0.32890 |
| H | -5.51173 | -0.25743 | -1.45429 |
| C | -0.59851 | -1.35483 | 0.11557  |
| C | -0.81994 | -2.68954 | 0.51971  |
| C | 0.70344  | -0.97524 | -0.23697 |
| C | 0.23734  | -3.59039 | 0.56651  |
| H | -1.81235 | -3.00619 | 0.82571  |
| C | 1.76621  | -1.88297 | -0.16789 |
| H | 0.91330  | 0.02296  | -0.59774 |
| C | 1.54018  | -3.20499 | 0.23211  |
| H | 0.05593  | -4.61388 | 0.88292  |
| H | 2.34727  | -3.92510 | 0.28497  |
| O | 2.98449  | -1.38103 | -0.52926 |
| C | 4.10367  | -2.26038 | -0.49480 |
| H | 3.96809  | -3.10631 | -1.17951 |
| H | 4.96053  | -1.66670 | -0.81583 |
| H | 4.28184  | -2.64044 | 0.51837  |
| C | -1.74744 | 0.97936  | 0.30216  |
| C | -0.60276 | 1.87885  | 0.67173  |
| H | -0.93839 | 2.61158  | 1.41814  |

|   |          |         |          |
|---|----------|---------|----------|
| H | 0.18364  | 1.28803 | 1.15309  |
| C | -0.01576 | 2.64859 | -0.52837 |
| H | 0.21446  | 1.94196 | -1.33788 |
| H | -0.79235 | 3.31541 | -0.92493 |
| C | 1.24177  | 3.46063 | -0.19103 |
| H | 1.48253  | 4.11514 | -1.04037 |
| H | 1.03003  | 4.12725 | 0.65814  |
| C | 2.47419  | 2.60535 | 0.13161  |
| H | 2.27226  | 1.96701 | 1.00106  |
| H | 2.66867  | 1.92233 | -0.70729 |
| C | 3.72260  | 3.44761 | 0.40549  |
| H | 3.56543  | 4.11699 | 1.26027  |
| H | 4.59082  | 2.81740 | 0.62920  |
| H | 3.97477  | 4.07136 | -0.46096 |
| H | -3.49847 | 2.37916 | 0.28815  |

4e\_conformer-043

|   |          |          |          |
|---|----------|----------|----------|
| C | 3.86448  | 0.26037  | -0.15764 |
| C | 1.69933  | -0.39482 | 0.06542  |
| N | 2.99936  | -0.80553 | -0.19307 |
| H | 3.25299  | -1.73990 | -0.48028 |
| C | 3.11014  | 1.37644  | 0.15834  |
| C | 5.32406  | 0.10664  | -0.43604 |
| H | 5.80047  | -0.60053 | 0.25500  |
| H | 5.51170  | -0.25777 | -1.45452 |
| H | 5.82686  | 1.07154  | -0.32882 |
| C | 0.59837  | -1.35478 | 0.11550  |
| C | 0.81961  | -2.68948 | 0.51982  |
| C | -0.70352 | -0.97509 | -0.23715 |
| C | -0.23778 | -3.59018 | 0.56670  |
| H | 1.81197  | -3.00621 | 0.82592  |
| C | -1.76641 | -1.88267 | -0.16796 |
| H | -0.91324 | 0.02306  | -0.59810 |
| C | -1.54057 | -3.20466 | 0.23223  |
| H | -0.05651 | -4.61366 | 0.88325  |
| H | -2.34776 | -3.92466 | 0.28518  |
| O | -2.98463 | -1.38059 | -0.52936 |
| C | -4.10391 | -2.25981 | -0.49483 |
| H | -3.96845 | -3.10579 | -1.17951 |
| H | -4.28210 | -2.63980 | 0.51836  |
| H | -4.96070 | -1.66603 | -0.81587 |
| C | 1.74764  | 0.97925  | 0.30224  |
| C | 0.60313  | 1.87891  | 0.67191  |
| H | -0.18331 | 1.28820  | 1.15336  |
| H | 0.93894  | 2.61159  | 1.41827  |

|   |          |         |          |
|---|----------|---------|----------|
| C | 0.01610  | 2.64874 | -0.52813 |
| H | 0.79266  | 3.31568 | -0.92457 |
| H | -0.21401 | 1.94220 | -1.33774 |
| C | -1.24152 | 3.46061 | -0.19074 |
| H | -1.02997 | 4.12693 | 0.65871  |
| H | -1.48216 | 4.11542 | -1.03989 |
| C | -2.47396 | 2.60514 | 0.13134  |
| H | -2.66826 | 1.92247 | -0.70789 |
| H | -2.27216 | 1.96642 | 1.00054  |
| C | -3.72245 | 3.44722 | 0.40538  |
| H | -3.56549 | 4.11620 | 1.26051  |
| H | -3.97450 | 4.07137 | -0.46082 |
| H | -4.59069 | 2.81686 | 0.62863  |
| H | 3.49888  | 2.37880 | 0.28830  |

4e\_conformer-044

|   |          |          |          |
|---|----------|----------|----------|
| C | -0.85600 | 3.04558  | -0.19981 |
| C | 0.05042  | 0.98547  | 0.12463  |
| N | 0.23999  | 2.24817  | -0.42076 |
| H | 1.02173  | 2.49653  | -1.01007 |
| C | -1.75547 | 2.29250  | 0.53119  |
| C | -0.93767 | 4.44401  | -0.71871 |
| H | -0.11610 | 5.06797  | -0.34435 |
| H | -0.89771 | 4.47782  | -1.81532 |
| H | -1.87877 | 4.90323  | -0.40442 |
| C | 1.10780  | -0.02361 | 0.03757  |
| C | 0.81241  | -1.39467 | -0.10732 |
| C | 2.45405  | 0.36774  | 0.07806  |
| C | 1.84231  | -2.32489 | -0.18998 |
| H | -0.21755 | -1.71762 | -0.18837 |
| C | 3.48537  | -0.57346 | -0.02342 |
| H | 2.72626  | 1.40933  | 0.21771  |
| C | 3.18463  | -1.93463 | -0.15186 |
| H | 1.60365  | -3.37877 | -0.30412 |
| H | 3.96664  | -2.68020 | -0.22498 |
| O | 4.75160  | -0.06431 | 0.02807  |
| C | 5.84043  | -0.97862 | -0.05085 |
| H | 5.83456  | -1.52590 | -1.00117 |
| H | 6.74507  | -0.37260 | 0.01343  |
| H | 5.82106  | -1.69516 | 0.77915  |
| C | -1.19862 | 0.99388  | 0.74354  |
| C | -1.84966 | -0.09190 | 1.55625  |
| H | -1.15655 | -0.92851 | 1.69604  |
| H | -2.06672 | 0.29614  | 2.56129  |
| C | -3.17002 | -0.60915 | 0.94973  |

|   |          |          |          |
|---|----------|----------|----------|
| H | -3.64174 | -1.29030 | 1.66878  |
| H | -3.85942 | 0.23834  | 0.82735  |
| C | -2.99508 | -1.31035 | -0.40068 |
| H | -2.40178 | -0.66287 | -1.05928 |
| H | -2.40822 | -2.23004 | -0.25763 |
| C | -4.31419 | -1.66329 | -1.10145 |
| H | -4.88792 | -0.74082 | -1.26990 |
| H | -4.08859 | -2.06973 | -2.09637 |
| C | -5.17910 | -2.66892 | -0.33470 |
| H | -4.62230 | -3.59408 | -0.13904 |
| H | -5.50574 | -2.26846 | 0.63127  |
| H | -6.07748 | -2.93320 | -0.90408 |
| H | -2.71483 | 2.64197  | 0.89173  |

4e\_conformer-045

|   |          |          |          |
|---|----------|----------|----------|
| C | -1.71644 | 2.78306  | -0.12160 |
| C | 0.01341  | 1.32806  | 0.12936  |
| N | -0.39036 | 2.55088  | -0.38900 |
| H | 0.18518  | 3.13453  | -0.97873 |
| C | -2.17061 | 1.69953  | 0.60827  |
| C | -2.41968 | 4.01152  | -0.59880 |
| H | -1.93524 | 4.92706  | -0.23610 |
| H | -2.44621 | 4.06999  | -1.69481 |
| H | -3.45227 | 4.01225  | -0.23955 |
| C | 1.40483  | 0.89431  | 0.01585  |
| C | 2.44706  | 1.84536  | -0.05553 |
| C | 1.74394  | -0.46467 | -0.02926 |
| C | 3.76830  | 1.43075  | -0.16741 |
| H | 2.21991  | 2.90477  | 0.01050  |
| C | 3.07953  | -0.87422 | -0.12436 |
| H | 0.97877  | -1.23040 | -0.02054 |
| C | 4.10623  | 0.07375  | -0.19915 |
| H | 4.56055  | 2.17262  | -0.21748 |
| H | 5.14446  | -0.22307 | -0.28047 |
| O | 3.27404  | -2.22600 | -0.15434 |
| C | 4.61002  | -2.70376 | -0.27275 |
| H | 5.07604  | -2.36017 | -1.20418 |
| H | 5.22495  | -2.38571 | 0.57778  |
| H | 4.53883  | -3.79217 | -0.28216 |
| C | -1.09598 | 0.77409  | 0.77102  |
| C | -1.16403 | -0.51764 | 1.53758  |
| H | -0.17222 | -0.76414 | 1.93436  |
| H | -1.82027 | -0.38121 | 2.40797  |
| C | -1.68816 | -1.72077 | 0.72533  |
| H | -1.04749 | -1.87640 | -0.15370 |

|   |          |          |          |
|---|----------|----------|----------|
| H | -1.59444 | -2.62539 | 1.34240  |
| C | -3.13935 | -1.57590 | 0.26082  |
| H | -3.78571 | -1.41100 | 1.13602  |
| H | -3.23462 | -0.67778 | -0.36302 |
| C | -3.64522 | -2.79195 | -0.52105 |
| H | -2.99461 | -2.95666 | -1.39159 |
| H | -3.55197 | -3.69116 | 0.10413  |
| C | -5.09522 | -2.63967 | -0.98739 |
| H | -5.77069 | -2.50425 | -0.13367 |
| H | -5.20817 | -1.76524 | -1.64009 |
| H | -5.43349 | -3.52018 | -1.54548 |
| H | -3.17286 | 1.58449  | 1.00063  |

4e\_conformer-046

|   |          |          |          |
|---|----------|----------|----------|
| C | 1.71625  | 2.78308  | -0.12187 |
| C | -0.01351 | 1.32802  | 0.12937  |
| N | 0.39014  | 2.55083  | -0.38911 |
| H | -0.18552 | 3.13445  | -0.97874 |
| C | 2.17055  | 1.69961  | 0.60800  |
| C | 2.41935  | 4.01156  | -0.59921 |
| H | 2.44583  | 4.06995  | -1.69522 |
| H | 1.93485  | 4.92709  | -0.23655 |
| H | 3.45197  | 4.01243  | -0.24000 |
| C | -1.40491 | 0.89422  | 0.01601  |
| C | -2.44719 | 1.84524  | -0.05498 |
| C | -1.74397 | -0.46476 | -0.02946 |
| C | -3.76843 | 1.43062  | -0.16676 |
| H | -2.22004 | 2.90465  | 0.01126  |
| C | -3.07955 | -0.87434 | -0.12446 |
| H | -0.97874 | -1.23045 | -0.02113 |
| C | -4.10630 | 0.07361  | -0.19882 |
| H | -4.56072 | 2.17247  | -0.21653 |
| H | -5.14454 | -0.22323 | -0.28005 |
| O | -3.27401 | -2.22612 | -0.15480 |
| C | -4.60999 | -2.70389 | -0.27320 |
| H | -5.22484 | -2.38613 | 0.57750  |
| H | -5.07613 | -2.36004 | -1.20446 |
| H | -4.53877 | -3.79230 | -0.28294 |
| C | 1.09598  | 0.77414  | 0.77094  |
| C | 1.16417  | -0.51751 | 1.53763  |
| H | 1.82040  | -0.38092 | 2.40801  |
| H | 0.17238  | -0.76405 | 1.93444  |
| C | 1.68841  | -1.72071 | 0.72555  |
| H | 1.59483  | -2.62523 | 1.34278  |
| H | 1.04771  | -1.87658 | -0.15342 |

|   |         |          |          |
|---|---------|----------|----------|
| C | 3.13956 | -1.57574 | 0.26094  |
| H | 3.23470 | -0.67768 | -0.36302 |
| H | 3.78595 | -1.41066 | 1.13608  |
| C | 3.64553 | -2.79182 | -0.52081 |
| H | 3.55241 | -3.69097 | 0.10448  |
| H | 2.99488 | -2.95672 | -1.39129 |
| C | 5.09548 | -2.63944 | -0.98726 |
| H | 5.77098 | -2.50384 | -0.13360 |
| H | 5.43381 | -3.51997 | -1.54526 |
| H | 5.20829 | -1.76508 | -1.64007 |
| H | 3.17285 | 1.58464  | 1.00024  |

4e\_conformer-047

|   |          |          |          |
|---|----------|----------|----------|
| C | -1.62276 | 2.60189  | -0.15116 |
| C | 0.15912  | 1.21112  | 0.09735  |
| N | -0.26423 | 2.47253  | -0.29780 |
| H | 0.33232  | 3.15854  | -0.73754 |
| C | -2.08162 | 1.40831  | 0.37580  |
| C | -2.34928 | 3.84790  | -0.53934 |
| H | -1.96721 | 4.72745  | -0.00562 |
| H | -2.26200 | 4.05621  | -1.61372 |
| H | -3.41222 | 3.74704  | -0.30418 |
| C | 1.57805  | 0.86029  | 0.07876  |
| C | 2.56458  | 1.84846  | 0.24721  |
| C | 1.98472  | -0.47505 | -0.11380 |
| C | 3.91666  | 1.50390  | 0.22301  |
| H | 2.27612  | 2.87882  | 0.43002  |
| C | 3.33994  | -0.81132 | -0.11524 |
| H | 1.23527  | -1.23151 | -0.29197 |
| C | 4.31580  | 0.18280  | 0.04866  |
| H | 4.66941  | 2.27586  | 0.35659  |
| H | 5.36359  | -0.09919 | 0.03605  |
| O | 3.80868  | -2.08250 | -0.28643 |
| C | 2.85551  | -3.12931 | -0.44000 |
| H | 2.19181  | -3.19557 | 0.43064  |
| H | 2.25055  | -2.99020 | -1.34419 |
| H | 3.43371  | -4.04993 | -0.52861 |
| C | -0.97381 | 0.52156  | 0.53488  |
| C | -1.04244 | -0.86293 | 1.11841  |
| H | -0.07931 | -1.12224 | 1.57304  |
| H | -1.77426 | -0.86797 | 1.93547  |
| C | -1.41895 | -1.96967 | 0.10748  |
| H | -0.64998 | -2.01671 | -0.67489 |
| H | -1.39207 | -2.93730 | 0.62814  |
| C | -2.78555 | -1.79426 | -0.56713 |

|   |          |          |          |
|---|----------|----------|----------|
| H | -2.80547 | -0.83437 | -1.09962 |
| H | -2.90186 | -2.57408 | -1.33277 |
| C | -3.98030 | -1.86497 | 0.39009  |
| H | -3.95407 | -2.82136 | 0.93150  |
| H | -3.89557 | -1.08113 | 1.15342  |
| C | -5.32127 | -1.71738 | -0.33321 |
| H | -5.45309 | -2.50592 | -1.08434 |
| H | -6.16418 | -1.77465 | 0.36486  |
| H | -5.38136 | -0.75290 | -0.85257 |
| H | -3.11049 | 1.19523  | 0.63578  |

#### 4e\_conformer-048

|   |          |          |          |
|---|----------|----------|----------|
| C | 1.62275  | 2.60190  | -0.15115 |
| C | -0.15913 | 1.21113  | 0.09736  |
| N | 0.26422  | 2.47254  | -0.29780 |
| H | -0.33232 | 3.15855  | -0.73753 |
| C | 2.08162  | 1.40833  | 0.37580  |
| C | 2.34927  | 3.84792  | -0.53933 |
| H | 3.41221  | 3.74706  | -0.30416 |
| H | 2.26201  | 4.05622  | -1.61371 |
| H | 1.96720  | 4.72746  | -0.00562 |
| C | -1.57805 | 0.86030  | 0.07875  |
| C | -2.56459 | 1.84845  | 0.24719  |
| C | -1.98471 | -0.47505 | -0.11379 |
| C | -3.91667 | 1.50389  | 0.22299  |
| H | -2.27614 | 2.87883  | 0.43000  |
| C | -3.33993 | -0.81132 | -0.11524 |
| H | -1.23525 | -1.23151 | -0.29196 |
| C | -4.31580 | 0.18278  | 0.04865  |
| H | -4.66943 | 2.27584  | 0.35657  |
| H | -5.36358 | -0.09921 | 0.03604  |
| O | -3.80865 | -2.08251 | -0.28642 |
| C | -2.85548 | -3.12932 | -0.43999 |
| H | -2.19178 | -3.19556 | 0.43066  |
| H | -3.43366 | -4.04994 | -0.52859 |
| H | -2.25052 | -2.99021 | -1.34417 |
| C | 0.97380  | 0.52157  | 0.53488  |
| C | 1.04243  | -0.86292 | 1.11841  |
| H | 1.77425  | -0.86796 | 1.93546  |
| H | 0.07930  | -1.12223 | 1.57303  |
| C | 1.41894  | -1.96965 | 0.10747  |
| H | 1.39205  | -2.93729 | 0.62812  |
| H | 0.64997  | -2.01668 | -0.67491 |
| C | 2.78554  | -1.79425 | -0.56714 |
| H | 2.80547  | -0.83435 | -1.09961 |



|   |         |          |          |
|---|---------|----------|----------|
| H | 2.90184 | -2.57406 | -1.33279 |
| C | 3.98029 | -1.86498 | 0.39008  |
| H | 3.89557 | -1.08116 | 1.15343  |
| H | 3.95404 | -2.82138 | 0.93148  |
| C | 5.32126 | -1.71740 | -0.33321 |
| H | 5.38136 | -0.75291 | -0.85256 |
| H | 6.16417 | -1.77468 | 0.36486  |
| H | 5.45307 | -2.50593 | -1.08435 |
| H | 3.11048 | 1.19525  | 0.63579  |

4e\_conformer-049

|   |          |          |          |
|---|----------|----------|----------|
| C | 2.59257  | -2.29025 | -0.09341 |
| C | 0.60484  | -1.18839 | -0.16038 |
| N | 1.32742  | -2.21174 | 0.43654  |
| H | 0.92848  | -2.88600 | 1.07429  |
| C | 2.69543  | -1.27516 | -1.02662 |
| C | 3.56819  | -3.33852 | 0.33222  |
| H | 4.52031  | -3.19244 | -0.18503 |
| H | 3.76198  | -3.30243 | 1.41187  |
| H | 3.21248  | -4.35087 | 0.09962  |
| C | -0.75798 | -0.88601 | 0.28260  |
| C | -1.10127 | -0.98890 | 1.64701  |
| C | -1.74832 | -0.49948 | -0.62846 |
| C | -2.39520 | -0.70018 | 2.06565  |
| H | -0.34352 | -1.26539 | 2.37359  |
| C | -3.04438 | -0.19216 | -0.19716 |
| H | -1.53681 | -0.45418 | -1.69050 |
| C | -3.37883 | -0.29370 | 1.15875  |
| H | -2.64900 | -0.77700 | 3.11931  |
| H | -4.37734 | -0.06665 | 1.51113  |
| O | -3.91638 | 0.17955  | -1.18036 |
| C | -5.25537 | 0.48296  | -0.80288 |
| H | -5.29221 | 1.33089  | -0.10838 |
| H | -5.77382 | 0.74681  | -1.72556 |
| H | -5.74659 | -0.38288 | -0.34267 |
| C | 1.45125  | -0.57577 | -1.08238 |
| C | 1.21364  | 0.67952  | -1.87711 |
| H | 1.68140  | 0.57120  | -2.86429 |
| H | 0.14525  | 0.83344  | -2.05661 |
| C | 1.78268  | 1.94204  | -1.19601 |
| H | 2.85532  | 1.79327  | -1.01899 |
| H | 1.69305  | 2.79017  | -1.88990 |
| C | 1.07381  | 2.28910  | 0.11688  |
| H | 1.17310  | 1.44775  | 0.81515  |
| H | -0.00211 | 2.39145  | -0.08210 |

|   |         |          |          |
|---|---------|----------|----------|
| C | 1.58620 | 3.56993  | 0.78987  |
| H | 1.48465 | 4.41368  | 0.09235  |
| H | 0.93885 | 3.80166  | 1.64625  |
| C | 3.03743 | 3.47957  | 1.27352  |
| H | 3.73490 | 3.33739  | 0.44080  |
| H | 3.33632 | 4.39161  | 1.80272  |
| H | 3.16709 | 2.63472  | 1.96170  |
| H | 3.57911 | -1.04813 | -1.61025 |

4e\_conformer-050

|   |          |          |          |
|---|----------|----------|----------|
| C | -2.95177 | -1.89578 | -0.27149 |
| C | -0.79564 | -1.17727 | -0.15518 |
| N | -1.70937 | -2.13793 | 0.25696  |
| H | -1.46085 | -2.96922 | 0.77393  |
| C | -2.84304 | -0.73717 | -1.02023 |
| C | -4.11423 | -2.79873 | -0.01755 |
| H | -3.93907 | -3.81219 | -0.40162 |
| H | -4.33456 | -2.89073 | 1.05367  |
| H | -5.00633 | -2.40416 | -0.51128 |
| C | 0.58914  | -1.22414 | 0.31102  |
| C | 0.91522  | -1.82213 | 1.54104  |
| C | 1.62644  | -0.67792 | -0.47106 |
| C | 2.24259  | -1.86987 | 1.97040  |
| H | 0.13149  | -2.21891 | 2.17871  |
| C | 2.94726  | -0.71178 | -0.02175 |
| H | 1.38740  | -0.24691 | -1.43247 |
| C | 3.26284  | -1.31705 | 1.20428  |
| H | 2.48115  | -2.33173 | 2.92443  |
| H | 4.29710  | -1.33671 | 1.53202  |
| O | 4.00251  | -0.19185 | -0.71555 |
| C | 3.72848  | 0.47664  | -1.94257 |
| H | 4.68943  | 0.84508  | -2.30394 |
| H | 3.04500  | 1.32115  | -1.79192 |
| H | 3.29859  | -0.20758 | -2.68407 |
| C | -1.49548 | -0.27611 | -0.96269 |
| C | -1.00613 | 1.00316  | -1.59176 |
| H | -0.20157 | 0.80741  | -2.31263 |
| H | -1.83033 | 1.42674  | -2.18013 |
| C | -0.52452 | 2.06506  | -0.58376 |
| H | 0.31871  | 1.66354  | -0.00775 |
| H | -0.13639 | 2.92341  | -1.14655 |
| C | -1.62228 | 2.52150  | 0.38168  |
| H | -2.43717 | 2.98992  | -0.19085 |
| H | -2.05552 | 1.63630  | 0.86400  |
| C | -1.13758 | 3.49435  | 1.46537  |

|   |          |          |          |
|---|----------|----------|----------|
| H | -1.96156 | 3.68209  | 2.16677  |
| H | -0.34176 | 3.01123  | 2.05016  |
| C | -0.62893 | 4.83395  | 0.92295  |
| H | 0.25554  | 4.70521  | 0.28945  |
| H | -1.39986 | 5.32941  | 0.31925  |
| H | -0.35512 | 5.51302  | 1.73851  |
| H | -3.65303 | -0.25623 | -1.55435 |

4e\_conformer-051

|   |          |          |          |
|---|----------|----------|----------|
| C | 2.95177  | -1.89578 | -0.27149 |
| C | 0.79564  | -1.17727 | -0.15518 |
| N | 1.70937  | -2.13793 | 0.25697  |
| H | 1.46085  | -2.96922 | 0.77393  |
| C | 2.84304  | -0.73718 | -1.02024 |
| C | 4.11423  | -2.79873 | -0.01755 |
| H | 3.93906  | -3.81220 | -0.40162 |
| H | 5.00632  | -2.40417 | -0.51128 |
| H | 4.33456  | -2.89073 | 1.05367  |
| C | -0.58914 | -1.22414 | 0.31103  |
| C | -0.91522 | -1.82212 | 1.54105  |
| C | -1.62644 | -0.67793 | -0.47105 |
| C | -2.24259 | -1.86985 | 1.97041  |
| H | -0.13149 | -2.21889 | 2.17872  |
| C | -2.94726 | -0.71178 | -0.02175 |
| H | -1.38740 | -0.24692 | -1.43247 |
| C | -3.26284 | -1.31704 | 1.20429  |
| H | -2.48115 | -2.33170 | 2.92445  |
| H | -4.29710 | -1.33669 | 1.53203  |
| O | -4.00251 | -0.19186 | -0.71556 |
| C | -3.72848 | 0.47662  | -1.94258 |
| H | -3.29859 | -0.20760 | -2.68407 |
| H | -4.68943 | 0.84506  | -2.30395 |
| H | -3.04500 | 1.32114  | -1.79194 |
| C | 1.49548  | -0.27611 | -0.96269 |
| C | 1.00613  | 1.00315  | -1.59176 |
| H | 1.83032  | 1.42674  | -2.18013 |
| H | 0.20156  | 0.80740  | -2.31263 |
| C | 0.52452  | 2.06506  | -0.58376 |
| H | 0.13639  | 2.92341  | -1.14656 |
| H | -0.31871 | 1.66354  | -0.00775 |
| C | 1.62228  | 2.52149  | 0.38168  |
| H | 2.05552  | 1.63630  | 0.86400  |
| H | 2.43717  | 2.98992  | -0.19085 |
| C | 1.13758  | 3.49435  | 1.46536  |
| H | 0.34177  | 3.01123  | 2.05016  |

|   |          |          |          |
|---|----------|----------|----------|
| H | 1.96157  | 3.68209  | 2.16676  |
| C | 0.62893  | 4.83395  | 0.92295  |
| H | 1.39987  | 5.32941  | 0.31925  |
| H | -0.25554 | 4.70521  | 0.28944  |
| H | 0.35512  | 5.51302  | 1.73850  |
| H | 3.65302  | -0.25623 | -1.55435 |

4e\_conformer-052

|   |          |          |          |
|---|----------|----------|----------|
| C | -1.24764 | 2.46369  | -0.05109 |
| C | 0.06624  | 0.60972  | 0.03616  |
| N | 0.01192  | 1.96310  | -0.26741 |
| H | 0.76736  | 2.47843  | -0.69595 |
| C | -2.01460 | 1.41772  | 0.42869  |
| C | -1.59664 | 3.88779  | -0.33604 |
| H | -0.96200 | 4.58498  | 0.22572  |
| H | -1.48572 | 4.13266  | -1.40052 |
| H | -2.63611 | 4.07899  | -0.05626 |
| C | 1.32486  | -0.12751 | -0.06525 |
| C | 1.35289  | -1.50680 | -0.35967 |
| C | 2.54684  | 0.53574  | 0.12463  |
| C | 2.56702  | -2.17868 | -0.44378 |
| H | 0.42901  | -2.03782 | -0.55107 |
| C | 3.76549  | -0.14430 | 0.02077  |
| H | 2.57495  | 1.58858  | 0.38721  |
| C | 3.78426  | -1.51583 | -0.25949 |
| H | 2.57542  | -3.24066 | -0.67338 |
| H | 4.71548  | -2.06307 | -0.33710 |
| O | 4.88108  | 0.61677  | 0.22500  |
| C | 6.14875  | -0.02775 | 0.15250  |
| H | 6.32241  | -0.45717 | -0.84154 |
| H | 6.89030  | 0.74808  | 0.34732  |
| H | 6.23900  | -0.81731 | 0.90822  |
| C | -1.20362 | 0.24361  | 0.48613  |
| C | -1.64902 | -1.10125 | 0.99014  |
| H | -0.78485 | -1.66029 | 1.36684  |
| H | -2.31536 | -0.95700 | 1.84957  |
| C | -2.37314 | -1.97196 | -0.06144 |
| H | -1.68253 | -2.17570 | -0.89029 |
| H | -2.60679 | -2.94385 | 0.39572  |
| C | -3.65751 | -1.36169 | -0.63718 |
| H | -3.42127 | -0.39891 | -1.10888 |
| H | -4.02765 | -2.01536 | -1.43945 |
| C | -4.77955 | -1.15941 | 0.38693  |
| H | -5.00820 | -2.12111 | 0.86795  |
| H | -4.43896 | -0.49196 | 1.18870  |

|   |          |          |          |
|---|----------|----------|----------|
| C | -6.05010 | -0.58084 | -0.24085 |
| H | -6.43666 | -1.24014 | -1.02780 |
| H | -6.84280 | -0.44690 | 0.50400  |
| H | -5.85063 | 0.39668  | -0.69722 |
| H | -3.05368 | 1.48939  | 0.72318  |

4e\_conformer-053

|   |          |          |          |
|---|----------|----------|----------|
| C | 1.24765  | 2.46369  | -0.05114 |
| C | -0.06625 | 0.60973  | 0.03612  |
| N | -0.01192 | 1.96311  | -0.26745 |
| H | -0.76735 | 2.47844  | -0.69600 |
| C | 2.01460  | 1.41772  | 0.42865  |
| C | 1.59666  | 3.88779  | -0.33609 |
| H | 1.48574  | 4.13267  | -1.40056 |
| H | 0.96202  | 4.58498  | 0.22568  |
| H | 2.63613  | 4.07899  | -0.05631 |
| C | -1.32487 | -0.12749 | -0.06530 |
| C | -1.35290 | -1.50677 | -0.35980 |
| C | -2.54685 | 0.53574  | 0.12467  |
| C | -2.56703 | -2.17864 | -0.44392 |
| H | -0.42903 | -2.03776 | -0.55128 |
| C | -3.76550 | -0.14430 | 0.02080  |
| H | -2.57494 | 1.58856  | 0.38732  |
| C | -3.78426 | -1.51582 | -0.25955 |
| H | -2.57543 | -3.24061 | -0.67359 |
| H | -4.71549 | -2.06306 | -0.33716 |
| O | -4.88108 | 0.61675  | 0.22513  |
| C | -6.14875 | -0.02777 | 0.15263  |
| H | -6.23897 | -0.81738 | 0.90830  |
| H | -6.89030 | 0.74804  | 0.34752  |
| H | -6.32244 | -0.45713 | -0.84144 |
| C | 1.20361  | 0.24361  | 0.48609  |
| C | 1.64899  | -1.10126 | 0.99010  |
| H | 2.31529  | -0.95700 | 1.84956  |
| H | 0.78481  | -1.66029 | 1.36677  |
| C | 2.37315  | -1.97197 | -0.06145 |
| H | 2.60678  | -2.94386 | 0.39574  |
| H | 1.68257  | -2.17571 | -0.89031 |
| C | 3.65755  | -1.36170 | -0.63714 |
| H | 4.02771  | -2.01538 | -1.43940 |
| H | 3.42132  | -0.39893 | -1.10885 |
| C | 4.77955  | -1.15942 | 0.38701  |
| H | 4.43893  | -0.49197 | 1.18877  |
| H | 5.00818  | -2.12112 | 0.86804  |
| C | 6.05011  | -0.58085 | -0.24072 |

|   |         |          |          |
|---|---------|----------|----------|
| H | 6.43671 | -1.24015 | -1.02766 |
| H | 5.85067 | 0.39667  | -0.69709 |
| H | 6.84279 | -0.44691 | 0.50415  |
| H | 3.05368 | 1.48938  | 0.72313  |

4e\_conformer-054

|   |          |          |          |
|---|----------|----------|----------|
| C | -1.68288 | -3.21574 | 0.02596  |
| C | -0.53848 | -1.26818 | 0.29668  |
| N | -0.44060 | -2.64310 | 0.13197  |
| H | 0.42286  | -3.16123 | 0.21095  |
| C | -2.60131 | -2.18294 | 0.09493  |
| C | -1.86918 | -4.69112 | -0.11498 |
| H | -2.93306 | -4.92410 | -0.21091 |
| H | -1.35630 | -5.08548 | -1.00150 |
| H | -1.48308 | -5.23908 | 0.75453  |
| C | 0.66505  | -0.44440 | 0.40224  |
| C | 0.67021  | 0.75965  | 1.13711  |
| C | 1.85589  | -0.84683 | -0.22010 |
| C | 1.82968  | 1.52075  | 1.22454  |
| H | -0.22501 | 1.08098  | 1.65470  |
| C | 3.02407  | -0.08227 | -0.11455 |
| H | 1.89309  | -1.74724 | -0.82519 |
| C | 3.01823  | 1.11647  | 0.60775  |
| H | 1.81956  | 2.44561  | 1.79456  |
| H | 3.90814  | 1.72713  | 0.69535  |
| O | 4.11392  | -0.58521 | -0.76577 |
| C | 5.32552  | 0.16092  | -0.70939 |
| H | 6.05420  | -0.40777 | -1.28850 |
| H | 5.20249  | 1.15609  | -1.15335 |
| H | 5.68164  | 0.26676  | 0.32240  |
| C | -1.89936 | -0.95462 | 0.27027  |
| C | -2.54616 | 0.40485  | 0.28806  |
| H | -3.63328 | 0.26969  | 0.35962  |
| H | -2.25922 | 0.96742  | 1.18360  |
| C | -2.23566 | 1.23955  | -0.96858 |
| H | -1.15093 | 1.37579  | -1.05077 |
| H | -2.53698 | 0.65667  | -1.84853 |
| C | -2.94696 | 2.59986  | -1.00111 |
| H | -2.78370 | 3.06012  | -1.98598 |
| H | -4.03034 | 2.43348  | -0.91602 |
| C | -2.50840 | 3.59831  | 0.08213  |
| H | -3.15308 | 4.48491  | 0.01749  |
| H | -2.68441 | 3.17131  | 1.07823  |
| C | -1.04444 | 4.03442  | -0.03545 |
| H | -0.84575 | 4.47237  | -1.02192 |

|   |          |          |         |
|---|----------|----------|---------|
| H | -0.79546 | 4.78780  | 0.72086 |
| H | -0.35730 | 3.19289  | 0.09851 |
| H | -3.67617 | -2.29279 | 0.02125 |

4e\_conformer-055

|   |          |          |          |
|---|----------|----------|----------|
| C | 1.68104  | -3.21669 | 0.02606  |
| C | 0.53777  | -1.26842 | 0.29645  |
| N | 0.43910  | -2.64330 | 0.13190  |
| H | -0.42466 | -3.16091 | 0.21087  |
| C | 2.60008  | -2.18443 | 0.09499  |
| C | 1.86648  | -4.69219 | -0.11470 |
| H | 1.47982  | -5.23984 | 0.75477  |
| H | 1.35357  | -5.08633 | -1.00131 |
| H | 2.93024  | -4.92584 | -0.21034 |
| C | -0.66530 | -0.44394 | 0.40188  |
| C | -0.66966 | 0.76047  | 1.13616  |
| C | -1.85651 | -0.84606 | -0.21995 |
| C | -1.82873 | 1.52219  | 1.22353  |
| H | 0.22586  | 1.08165  | 1.65331  |
| C | -3.02428 | -0.08086 | -0.11446 |
| H | -1.89435 | -1.74673 | -0.82461 |
| C | -3.01766 | 1.11821  | 0.60726  |
| H | -1.81799 | 2.44733  | 1.79309  |
| H | -3.90723 | 1.72936  | 0.69481  |
| O | -4.11455 | -0.58358 | -0.76514 |
| C | -5.32579 | 0.16314  | -0.70875 |
| H | -5.20242 | 1.15806  | -1.15318 |
| H | -6.05489 | -0.40547 | -1.28739 |
| H | -5.68156 | 0.26960  | 0.32310  |
| C | 1.89885  | -0.95567 | 0.27013  |
| C | 2.54654  | 0.40338  | 0.28797  |
| H | 2.26021  | 0.96597  | 1.18371  |
| H | 3.63358  | 0.26748  | 0.35925  |
| C | 2.23633  | 1.23852  | -0.96845 |
| H | 2.53709  | 0.65560  | -1.84856 |
| H | 1.15167  | 1.37550  | -1.05040 |
| C | 2.94854  | 2.59836  | -1.00086 |
| H | 4.03180  | 2.43123  | -0.91577 |
| H | 2.78560  | 3.05882  | -1.98568 |
| C | 2.51064  | 3.59700  | 0.08247  |
| H | 2.68612  | 3.16970  | 1.07853  |
| H | 3.15609  | 4.48307  | 0.01808  |
| C | 1.04708  | 4.03439  | -0.03531 |
| H | 0.35920  | 3.19342  | 0.09829  |
| H | 0.79859  | 4.78780  | 0.72113  |

|   |         |          |          |
|---|---------|----------|----------|
| H | 0.84898 | 4.47275  | -1.02171 |
| H | 3.67488 | -2.29492 | 0.02144  |

4e\_conformer-056

|   |          |          |          |
|---|----------|----------|----------|
| C | 3.85486  | 0.52235  | -0.12812 |
| C | 1.72104  | -0.26810 | -0.11461 |
| N | 3.05111  | -0.54902 | 0.16788  |
| H | 3.39246  | -1.46147 | 0.43402  |
| C | 3.02104  | 1.52718  | -0.58652 |
| C | 5.33775  | 0.47573  | 0.04533  |
| H | 5.80126  | -0.29350 | -0.58616 |
| H | 5.77466  | 1.43994  | -0.22800 |
| H | 5.62190  | 0.25885  | 1.08300  |
| C | 0.68124  | -1.26149 | 0.14946  |
| C | 0.86053  | -2.24335 | 1.14871  |
| C | -0.51429 | -1.27258 | -0.58196 |
| C | -0.12955 | -3.18863 | 1.38872  |
| H | 1.75890  | -2.24240 | 1.75803  |
| C | -1.51317 | -2.21758 | -0.32310 |
| H | -0.68715 | -0.55790 | -1.37707 |
| C | -1.32636 | -3.19099 | 0.66556  |
| H | 0.01952  | -3.93528 | 2.16384  |
| H | -2.08558 | -3.93318 | 0.87831  |
| O | -2.63114 | -2.11347 | -1.10140 |
| C | -3.67663 | -3.05738 | -0.89425 |
| H | -4.45849 | -2.79971 | -1.60987 |
| H | -3.33316 | -4.08188 | -1.08199 |
| H | -4.07819 | -2.99169 | 0.12416  |
| C | 1.67970  | 1.04570  | -0.58935 |
| C | 0.47476  | 1.87317  | -0.95061 |
| H | 0.82332  | 2.83731  | -1.34223 |
| H | -0.09275 | 1.41205  | -1.77017 |
| C | -0.47739 | 2.13214  | 0.22961  |
| H | -0.78884 | 1.17290  | 0.66102  |
| H | 0.07271  | 2.66279  | 1.01873  |
| C | -1.71787 | 2.93424  | -0.16933 |
| H | -1.40981 | 3.89547  | -0.60689 |
| H | -2.25587 | 2.39574  | -0.96378 |
| C | -2.67320 | 3.19232  | 0.99979  |
| H | -2.97587 | 2.22993  | 1.43595  |
| H | -2.13642 | 3.73185  | 1.79268  |
| C | -3.91792 | 3.98457  | 0.59233  |
| H | -4.48919 | 3.45070  | -0.17711 |
| H | -4.58389 | 4.15477  | 1.44596  |
| H | -3.64379 | 4.96379  | 0.18079  |



|   |         |         |          |
|---|---------|---------|----------|
| H | 3.33831 | 2.51801 | -0.88714 |
|---|---------|---------|----------|

4e\_conformer-057

|   |          |          |          |
|---|----------|----------|----------|
| C | -3.83348 | 0.34911  | 0.09949  |
| C | -1.65650 | -0.31332 | 0.10306  |
| N | -2.96877 | -0.68434 | -0.15659 |
| H | -3.25601 | -1.62491 | -0.38617 |
| C | -3.05899 | 1.42048  | 0.50904  |
| C | -5.31169 | 0.20778  | -0.06188 |
| H | -5.58746 | -0.06248 | -1.08926 |
| H | -5.72486 | -0.56489 | 0.59955  |
| H | -5.80428 | 1.15328  | 0.18033  |
| C | -0.55785 | -1.24917 | -0.13063 |
| C | -0.67720 | -2.28047 | -1.07899 |
| C | 0.64765  | -1.13209 | 0.59065  |
| C | 0.38258  | -3.16241 | -1.29704 |
| H | -1.58063 | -2.37320 | -1.67360 |
| C | 1.70979  | -2.00328 | 0.34615  |
| H | 0.73583  | -0.36444 | 1.34541  |
| C | 1.57826  | -3.03189 | -0.59916 |
| H | 0.27884  | -3.95239 | -2.03566 |
| H | 2.41454  | -3.70187 | -0.77002 |
| O | 2.91301  | -1.93816 | 0.98915  |
| C | 3.10975  | -0.88927 | 1.93175  |
| H | 2.99658  | 0.09507  | 1.46173  |
| H | 2.41079  | -0.97006 | 2.77300  |
| H | 4.13130  | -1.00284 | 2.29687  |
| C | -1.69143 | 1.02071  | 0.52148  |
| C | -0.53515 | 1.92933  | 0.84728  |
| H | -0.93525 | 2.90359  | 1.15548  |
| H | 0.02519  | 1.55727  | 1.71664  |
| C | 0.44448  | 2.13457  | -0.32098 |
| H | 0.75946  | 1.15528  | -0.69369 |
| H | -0.08389 | 2.62553  | -1.14965 |
| C | 1.67348  | 2.95925  | 0.07100  |
| H | 1.34935  | 3.96019  | 0.38853  |
| H | 2.14949  | 2.49986  | 0.95093  |
| C | 2.71730  | 3.09158  | -1.04753 |
| H | 3.47627  | 3.82393  | -0.74226 |
| H | 2.23573  | 3.50509  | -1.94490 |
| C | 3.41351  | 1.77238  | -1.40073 |
| H | 4.16927  | 1.92008  | -2.18047 |
| H | 3.91861  | 1.35071  | -0.52256 |
| H | 2.70501  | 1.02068  | -1.76514 |
| H | -3.43367 | 2.40240  | 0.77016  |

## 4e\_conformer-058

|   |          |          |          |
|---|----------|----------|----------|
| C | -0.41326 | 3.35693  | -0.23236 |
| C | 0.17639  | 1.17759  | 0.03834  |
| N | 0.58329  | 2.42839  | -0.40525 |
| H | 1.44923  | 2.60226  | -0.89494 |
| C | -1.47415 | 2.69705  | 0.36126  |
| C | -0.25481 | 4.77950  | -0.65980 |
| H | 0.60350  | 5.25974  | -0.17281 |
| H | -0.10505 | 4.86831  | -1.74377 |
| H | -1.15117 | 5.34855  | -0.39894 |
| C | 1.08108  | 0.03047  | -0.01392 |
| C | 0.59528  | -1.28430 | -0.17604 |
| C | 2.46768  | 0.21895  | 0.08728  |
| C | 1.48053  | -2.35520 | -0.21932 |
| H | -0.46656 | -1.45788 | -0.29877 |
| C | 3.35309  | -0.86313 | 0.02524  |
| H | 2.88572  | 1.20803  | 0.24645  |
| C | 2.86264  | -2.16603 | -0.12289 |
| H | 1.09467  | -3.36288 | -0.34695 |
| H | 3.52957  | -3.01808 | -0.16606 |
| O | 4.67688  | -0.54486 | 0.13379  |
| C | 5.62229  | -1.60915 | 0.09934  |
| H | 5.57750  | -2.15290 | -0.85197 |
| H | 6.60236  | -1.14206 | 0.20453  |
| H | 5.46225  | -2.31225 | 0.92559  |
| C | -1.11756 | 1.32686  | 0.53777  |
| C | -1.98683 | 0.27798  | 1.17047  |
| H | -1.36641 | -0.52873 | 1.57946  |
| H | -2.52305 | 0.71678  | 2.02292  |
| C | -3.02197 | -0.32435 | 0.20285  |
| H | -3.67658 | 0.47761  | -0.16618 |
| H | -2.50000 | -0.71734 | -0.67867 |
| C | -3.86762 | -1.42390 | 0.85149  |
| H | -3.20461 | -2.23236 | 1.19444  |
| H | -4.34560 | -1.01680 | 1.75362  |
| C | -4.94828 | -2.01349 | -0.06579 |
| H | -5.56992 | -2.70418 | 0.51921  |
| H | -5.61670 | -1.20742 | -0.40003 |
| C | -4.39168 | -2.75459 | -1.28596 |
| H | -3.83926 | -2.08307 | -1.95220 |
| H | -3.70596 | -3.55411 | -0.97810 |
| H | -5.19715 | -3.21170 | -1.87182 |
| H | -2.41164 | 3.15355  | 0.65363  |

## 4e\_conformer-059

|   |          |          |          |
|---|----------|----------|----------|
| C | -2.88917 | -2.00175 | -0.17710 |
| C | -0.77380 | -1.17102 | -0.10571 |
| N | -1.63997 | -2.14140 | 0.37705  |
| H | -1.35030 | -2.91832 | 0.95402  |
| C | -2.83267 | -0.89915 | -1.00956 |
| C | -4.00374 | -2.94824 | 0.12898  |
| H | -3.77475 | -3.97211 | -0.19468 |
| H | -4.22231 | -2.98862 | 1.20372  |
| H | -4.91375 | -2.63074 | -0.38725 |
| C | 0.60456  | -1.09693 | 0.38353  |
| C | 0.89829  | -1.38211 | 1.72713  |
| C | 1.65651  | -0.74886 | -0.48549 |
| C | 2.21442  | -1.31001 | 2.18819  |
| H | 0.09512  | -1.62874 | 2.41464  |
| C | 2.96602  | -0.65838 | -0.00896 |
| H | 1.43792  | -0.58151 | -1.53110 |
| C | 3.24979  | -0.94382 | 1.33553  |
| H | 2.43214  | -1.52817 | 3.23000  |
| H | 4.27564  | -0.87404 | 1.68253  |
| O | 4.03939  | -0.31798 | -0.78104 |
| C | 3.80213  | 0.01042  | -2.14607 |
| H | 3.11456  | 0.86005  | -2.23778 |
| H | 4.77346  | 0.28112  | -2.56194 |
| H | 3.39476  | -0.84491 | -2.69851 |
| C | -1.50730 | -0.36746 | -0.97755 |
| C | -1.08898 | 0.91322  | -1.64776 |
| H | -0.00831 | 0.93419  | -1.81846 |
| H | -1.55871 | 0.96525  | -2.63847 |
| C | -1.47809 | 2.17685  | -0.85088 |
| H | -1.26757 | 3.05558  | -1.47376 |
| H | -2.56283 | 2.17038  | -0.67293 |
| C | -0.74463 | 2.29634  | 0.48855  |
| H | -0.92150 | 1.38371  | 1.07029  |
| H | 0.33919  | 2.33258  | 0.30327  |
| C | -1.15845 | 3.51346  | 1.32711  |
| H | -2.23986 | 3.46681  | 1.52007  |
| H | -0.67006 | 3.44796  | 2.30863  |
| C | -0.81259 | 4.86244  | 0.68811  |
| H | 0.26127  | 4.92803  | 0.47186  |
| H | -1.34977 | 5.01487  | -0.25445 |
| H | -1.07109 | 5.69397  | 1.35373  |
| H | -3.66220 | -0.50374 | -1.58278 |

## 4e\_conformer-060

|   |          |          |          |
|---|----------|----------|----------|
| C | 2.89139  | -1.99908 | -0.17691 |
| C | 0.77527  | -1.17024 | -0.10560 |
| N | 1.64230  | -2.13984 | 0.37720  |
| H | 1.35330  | -2.91700 | 0.95418  |
| C | 2.83392  | -0.89653 | -1.00937 |
| C | 4.00679  | -2.94458 | 0.12918  |
| H | 4.22542  | -2.98473 | 1.20391  |
| H | 3.77872  | -3.96866 | -0.19444 |
| H | 4.91651  | -2.62628 | -0.38707 |
| C | -0.60321 | -1.09744 | 0.38356  |
| C | -0.89676 | -1.38277 | 1.72716  |
| C | -1.65542 | -0.75044 | -0.48557 |
| C | -2.21300 | -1.31190 | 2.18811  |
| H | -0.09341 | -1.62856 | 2.41476  |
| C | -2.96505 | -0.66118 | -0.00915 |
| H | -1.43690 | -0.58293 | -1.53116 |
| C | -3.24866 | -0.94679 | 1.33534  |
| H | -2.43059 | -1.53018 | 3.22993  |
| H | -4.27460 | -0.87796 | 1.68226  |
| O | -4.03869 | -0.32185 | -0.78133 |
| C | -3.80164 | 0.00675  | -2.14635 |
| H | -3.39336 | -0.84820 | -2.69873 |
| H | -4.77320 | 0.27647  | -2.56231 |
| H | -3.11490 | 0.85706  | -2.23801 |
| C | 1.50806  | -0.36603 | -0.97741 |
| C | 1.08864  | 0.91424  | -1.64773 |
| H | 1.55885  | 0.96684  | -2.63817 |
| H | 0.00804  | 0.93399  | -1.81904 |
| C | 1.47589  | 2.17827  | -0.85059 |
| H | 2.56054  | 2.17301  | -0.67204 |
| H | 1.26474  | 3.05679  | -1.47358 |
| C | 0.74157  | 2.29694  | 0.48843  |
| H | -0.34220 | 2.33190  | 0.30257  |
| H | 0.91920  | 1.38454  | 1.07029  |
| C | 1.15347  | 3.51458  | 1.32718  |
| H | 0.66467  | 3.44848  | 2.30845  |
| H | 2.23483  | 3.46928  | 1.52069  |
| C | 0.80625  | 4.86313  | 0.68800  |
| H | -0.26759 | 4.92737  | 0.47120  |
| H | 1.06337  | 5.69498  | 1.35374  |
| H | 1.34372  | 5.01623  | -0.25429 |
| H | 3.66310  | -0.50038 | -1.58258 |

4e\_conformer-061

|   |          |          |          |
|---|----------|----------|----------|
| C | 2.73283  | -1.94273 | -0.31880 |
| C | 0.98106  | -0.77973 | 0.54760  |
| N | 1.37848  | -1.94380 | -0.09498 |
| H | 0.76957  | -2.73274 | -0.26081 |
| C | 3.21083  | -0.73630 | 0.16171  |
| C | 3.43461  | -3.09620 | -0.95789 |
| H | 3.35406  | -4.01136 | -0.35666 |
| H | 3.02742  | -3.32345 | -1.95143 |
| H | 4.49713  | -2.86646 | -1.07482 |
| C | -0.42998 | -0.53613 | 0.84603  |
| C | -0.81973 | 0.14725  | 2.00809  |
| C | -1.42213 | -0.98326 | -0.04977 |
| C | -2.17093 | 0.39440  | 2.25461  |
| H | -0.06704 | 0.47279  | 2.71756  |
| C | -2.77267 | -0.74127 | 0.21291  |
| H | -1.11989 | -1.47890 | -0.96396 |
| C | -3.15122 | -0.04385 | 1.36977  |
| H | -2.46449 | 0.92724  | 3.15473  |
| H | -4.20511 | 0.14068  | 1.55099  |
| O | -3.79394 | -1.12936 | -0.60584 |
| C | -3.46173 | -1.81524 | -1.80847 |
| H | -2.93539 | -2.75462 | -1.60053 |
| H | -4.41029 | -2.03152 | -2.30152 |
| H | -2.84254 | -1.19168 | -2.46492 |
| C | 2.12347  | 0.00452  | 0.71245  |
| C | 2.22471  | 1.41491  | 1.23798  |
| H | 2.03831  | 1.44661  | 2.32043  |
| H | 3.26194  | 1.74873  | 1.10517  |
| C | 1.27991  | 2.41953  | 0.54914  |
| H | 0.24790  | 2.15540  | 0.79588  |
| H | 1.45404  | 3.41730  | 0.97546  |
| C | 1.44253  | 2.48052  | -0.97251 |
| H | 2.43903  | 2.87752  | -1.21320 |
| H | 1.41107  | 1.46062  | -1.37759 |
| C | 0.36871  | 3.32505  | -1.67428 |
| H | 0.35198  | 4.33455  | -1.23891 |
| H | 0.64912  | 3.45177  | -2.72851 |
| C | -1.03611 | 2.71348  | -1.60507 |
| H | -1.04150 | 1.69943  | -2.02371 |
| H | -1.40152 | 2.64044  | -0.57510 |
| H | -1.75746 | 3.31501  | -2.17000 |
| H | 4.24087  | -0.40547 | 0.11214  |

4e\_conformer-062

|   |         |         |         |
|---|---------|---------|---------|
| C | 1.32733 | 2.87611 | 0.31009 |
|---|---------|---------|---------|

|   |          |          |          |
|---|----------|----------|----------|
| C | 0.15865  | 1.12197  | -0.54726 |
| N | 0.10499  | 2.25519  | 0.25347  |
| H | -0.74942 | 2.64178  | 0.62884  |
| C | 2.19507  | 2.10900  | -0.44695 |
| C | 1.54076  | 4.14360  | 1.07104  |
| H | 0.93265  | 4.96794  | 0.67595  |
| H | 1.28565  | 4.03139  | 2.13258  |
| H | 2.59033  | 4.44313  | 1.00767  |
| C | -1.02662 | 0.28516  | -0.73039 |
| C | -1.23760 | -0.43626 | -1.91665 |
| C | -1.99178 | 0.20281  | 0.29536  |
| C | -2.38035 | -1.22326 | -2.06514 |
| H | -0.52223 | -0.36396 | -2.72710 |
| C | -3.13937 | -0.57559 | 0.12932  |
| H | -1.81535 | 0.72239  | 1.22892  |
| C | -3.33564 | -1.29826 | -1.05683 |
| H | -2.53377 | -1.77656 | -2.98752 |
| H | -4.23028 | -1.90319 | -1.16280 |
| O | -4.11839 | -0.70761 | 1.07202  |
| C | -3.97194 | 0.00892  | 2.29360  |
| H | -3.91823 | 1.09021  | 2.11820  |
| H | -4.86045 | -0.22032 | 2.88325  |
| H | -3.07788 | -0.31303 | 2.84121  |
| C | 1.47618  | 1.00713  | -0.99622 |
| C | 2.09816  | -0.10343 | -1.80283 |
| H | 1.63234  | -0.18272 | -2.79338 |
| H | 3.14758  | 0.15942  | -1.98848 |
| C | 2.04741  | -1.48253 | -1.11719 |
| H | 1.00010  | -1.77751 | -0.97662 |
| H | 2.49286  | -2.22754 | -1.79119 |
| C | 2.76878  | -1.51998 | 0.23173  |
| H | 3.82245  | -1.23540 | 0.09089  |
| H | 2.33374  | -0.76040 | 0.89474  |
| C | 2.69895  | -2.88875 | 0.91482  |
| H | 1.64478  | -3.16938 | 1.05007  |
| H | 3.13460  | -3.64965 | 0.25186  |
| C | 3.41403  | -2.91785 | 2.26795  |
| H | 2.97575  | -2.18752 | 2.95932  |
| H | 3.34776  | -3.90574 | 2.73800  |
| H | 4.47700  | -2.67054 | 2.15649  |
| H | 3.24994  | 2.30898  | -0.58816 |

4e\_conformer-063

|   |          |         |          |
|---|----------|---------|----------|
| C | 0.49262  | 3.23585 | -0.12042 |
| C | -0.21956 | 1.08295 | 0.04628  |

|   |          |          |          |
|---|----------|----------|----------|
| N | -0.55802 | 2.37629  | -0.32721 |
| H | -1.41697 | 2.62408  | -0.79696 |
| C | 1.51934  | 2.48636  | 0.42463  |
| C | 0.41284  | 4.68558  | -0.47171 |
| H | 1.34427  | 5.18710  | -0.19561 |
| H | 0.25534  | 4.83939  | -1.54728 |
| H | -0.40969 | 5.18890  | 0.05232  |
| C | -1.18968 | -0.00620 | -0.05264 |
| C | -0.78211 | -1.33442 | -0.29808 |
| C | -2.56127 | 0.25379  | 0.08673  |
| C | -1.72738 | -2.35009 | -0.38334 |
| H | 0.26621  | -1.55863 | -0.45216 |
| C | -3.50766 | -0.77209 | -0.01714 |
| H | -2.91938 | 1.25419  | 0.30896  |
| C | -3.09458 | -2.08972 | -0.24796 |
| H | -1.40198 | -3.36887 | -0.57522 |
| H | -3.80947 | -2.89945 | -0.32511 |
| O | -4.80911 | -0.38740 | 0.13674  |
| C | -5.81371 | -1.39399 | 0.06436  |
| H | -6.76362 | -0.88002 | 0.21692  |
| H | -5.81784 | -1.88474 | -0.91634 |
| H | -5.67801 | -2.15048 | 0.84667  |
| C | 1.08568  | 1.13138  | 0.53553  |
| C | 1.89893  | 0.00445  | 1.10572  |
| H | 2.45386  | 0.36640  | 1.98216  |
| H | 1.23830  | -0.79263 | 1.46756  |
| C | 2.90846  | -0.58933 | 0.10636  |
| H | 2.37393  | -0.93712 | -0.78919 |
| H | 3.57734  | 0.21132  | -0.23294 |
| C | 3.71676  | -1.74682 | 0.69975  |
| H | 4.28172  | -1.38428 | 1.57138  |
| H | 3.01787  | -2.50455 | 1.08157  |
| C | 4.68364  | -2.41410 | -0.28858 |
| H | 5.12872  | -3.29492 | 0.19291  |
| H | 4.11411  | -2.79075 | -1.15006 |
| C | 5.80531  | -1.49404 | -0.78127 |
| H | 6.50092  | -2.03385 | -1.43377 |
| H | 5.41258  | -0.64350 | -1.34907 |
| H | 6.38059  | -1.09251 | 0.06248  |
| H | 2.48445  | 2.87278  | 0.72795  |

4e\_conformer-064

|   |          |         |          |
|---|----------|---------|----------|
| C | -0.49265 | 3.23581 | -0.12041 |
| C | 0.21957  | 1.08292 | 0.04627  |
| N | 0.55800  | 2.37627 | -0.32720 |

|   |          |          |          |
|---|----------|----------|----------|
| H | 1.41695  | 2.62408  | -0.79696 |
| C | -1.51936 | 2.48629  | 0.42463  |
| C | -0.41289 | 4.68555  | -0.47168 |
| H | 0.40962  | 5.18888  | 0.05236  |
| H | -0.25538 | 4.83936  | -1.54725 |
| H | -1.34434 | 5.18704  | -0.19559 |
| C | 1.18971  | -0.00621 | -0.05265 |
| C | 0.78217  | -1.33444 | -0.29811 |
| C | 2.56129  | 0.25380  | 0.08674  |
| C | 1.72746  | -2.35009 | -0.38338 |
| H | -0.26615 | -1.55867 | -0.45222 |
| C | 3.50770  | -0.77206 | -0.01713 |
| H | 2.91939  | 1.25420  | 0.30899  |
| C | 3.09466  | -2.08970 | -0.24797 |
| H | 1.40209  | -3.36887 | -0.57527 |
| H | 3.80956  | -2.89941 | -0.32512 |
| O | 4.80914  | -0.38734 | 0.13677  |
| C | 5.81377  | -1.39391 | 0.06438  |
| H | 5.81792  | -1.88465 | -0.91633 |
| H | 6.76366  | -0.87992 | 0.21696  |
| H | 5.67807  | -2.15041 | 0.84668  |
| C | -1.08568 | 1.13132  | 0.53551  |
| C | -1.89892 | 0.00438  | 1.10569  |
| H | -1.23828 | -0.79273 | 1.46747  |
| H | -2.45382 | 0.36629  | 1.98215  |
| C | -2.90848 | -0.58935 | 0.10633  |
| H | -3.57737 | 0.21131  | -0.23290 |
| H | -2.37399 | -0.93711 | -0.78925 |
| C | -3.71677 | -1.74687 | 0.69970  |
| H | -3.01788 | -2.50464 | 1.08141  |
| H | -4.28166 | -1.38438 | 1.57139  |
| C | -4.68375 | -2.41405 | -0.28862 |
| H | -4.11429 | -2.79065 | -1.15017 |
| H | -5.12881 | -3.29489 | 0.19284  |
| C | -5.80544 | -1.49392 | -0.78114 |
| H | -6.38063 | -1.09244 | 0.06269  |
| H | -5.41272 | -0.64334 | -1.34891 |
| H | -6.50110 | -2.03367 | -1.43363 |
| H | -2.48448 | 2.87270  | 0.72795  |

4e\_conformer-065

|   |          |         |         |
|---|----------|---------|---------|
| C | -0.16416 | 3.66129 | 0.04032 |
| C | 0.09437  | 1.41304 | 0.27698 |
| N | 0.73998  | 2.63515 | 0.14690 |
| H | 1.73740  | 2.76099 | 0.24348 |



|   |          |          |          |
|---|----------|----------|----------|
| C | -1.42210 | 3.08532  | 0.07509  |
| C | 0.26233  | 5.08860  | -0.07010 |
| H | -0.61552 | 5.73232  | -0.17153 |
| H | 0.82083  | 5.42015  | 0.81505  |
| H | 0.90656  | 5.25682  | -0.94256 |
| C | 0.86098  | 0.17170  | 0.37479  |
| C | 0.34585  | -0.96254 | 1.03778  |
| C | 2.14250  | 0.08339  | -0.18935 |
| C | 1.09542  | -2.12986 | 1.11280  |
| H | -0.62855 | -0.91954 | 1.50709  |
| C | 2.89774  | -1.09160 | -0.09604 |
| H | 2.56926  | 0.91480  | -0.74148 |
| C | 2.37531  | -2.21503 | 0.55475  |
| H | 0.68598  | -2.99516 | 1.62686  |
| H | 2.93903  | -3.13644 | 0.63098  |
| O | 4.12826  | -1.04501 | -0.68726 |
| C | 4.93132  | -2.22008 | -0.64476 |
| H | 5.85392  | -1.97111 | -1.17068 |
| H | 5.16561  | -2.50674 | 0.38752  |
| H | 4.43796  | -3.05930 | -1.14975 |
| C | -1.27748 | 1.67593  | 0.22865  |
| C | -2.41441 | 0.68925  | 0.22778  |
| H | -2.40744 | 0.08623  | 1.14309  |
| H | -3.35980 | 1.24629  | 0.25058  |
| C | -2.41685 | -0.23661 | -1.00354 |
| H | -2.54472 | 0.38583  | -1.89857 |
| H | -1.43411 | -0.71470 | -1.09760 |
| C | -3.50086 | -1.32153 | -0.96641 |
| H | -4.48469 | -0.85666 | -0.80344 |
| H | -3.55188 | -1.80639 | -1.95146 |
| C | -3.26658 | -2.40215 | 0.09687  |
| H | -2.26468 | -2.83112 | -0.04503 |
| H | -3.26516 | -1.95017 | 1.09716  |
| C | -4.31614 | -3.51536 | 0.05078  |
| H | -4.31731 | -4.01490 | -0.92589 |
| H | -4.12890 | -4.27669 | 0.81659  |
| H | -5.32317 | -3.11342 | 0.21760  |
| H | -2.36010 | 3.62036  | -0.00651 |

#### 4e\_conformer-066

|   |          |         |          |
|---|----------|---------|----------|
| C | 1.51122  | 2.72566 | 0.06939  |
| C | 0.19541  | 0.92387 | 0.51521  |
| N | 0.23156  | 2.23165 | 0.05054  |
| H | -0.59075 | 2.78185 | -0.15295 |
| C | 2.32195  | 1.70343 | 0.53033  |

|   |          |          |          |
|---|----------|----------|----------|
| C | 1.83020  | 4.12572  | -0.34183 |
| H | 1.33397  | 4.86585  | 0.29951  |
| H | 2.90816  | 4.29603  | -0.27589 |
| H | 1.51912  | 4.32978  | -1.37435 |
| C | -1.06723 | 0.18802  | 0.56380  |
| C | -1.29318 | -0.81859 | 1.52581  |
| C | -2.09492 | 0.48269  | -0.34388 |
| C | -2.50489 | -1.49780 | 1.55483  |
| H | -0.52749 | -1.04680 | 2.25750  |
| C | -3.31850 | -0.19623 | -0.29885 |
| H | -1.95511 | 1.22408  | -1.12426 |
| C | -3.53186 | -1.19992 | 0.65275  |
| H | -2.66782 | -2.26999 | 2.30165  |
| H | -4.46782 | -1.74238 | 0.70019  |
| O | -4.23480 | 0.18468  | -1.23738 |
| C | -5.48989 | -0.48771 | -1.25289 |
| H | -5.36539 | -1.56120 | -1.43943 |
| H | -6.03122 | -0.34507 | -0.30985 |
| H | -6.05871 | -0.04061 | -2.06917 |
| C | 1.51114  | 0.56646  | 0.81868  |
| C | 2.04628  | -0.77231 | 1.25682  |
| H | 3.12571  | -0.66643 | 1.41743  |
| H | 1.63400  | -1.06547 | 2.23099  |
| C | 1.79238  | -1.91753 | 0.25530  |
| H | 2.25570  | -2.83085 | 0.65029  |
| H | 0.71560  | -2.11646 | 0.20667  |
| C | 2.30179  | -1.64163 | -1.16621 |
| H | 2.06991  | -2.51355 | -1.79422 |
| H | 1.73706  | -0.79873 | -1.58413 |
| C | 3.80237  | -1.33344 | -1.27670 |
| H | 4.04088  | -1.14426 | -2.33190 |
| H | 4.02422  | -0.39899 | -0.74606 |
| C | 4.70891  | -2.44955 | -0.74929 |
| H | 4.49475  | -3.40109 | -1.25221 |
| H | 5.76600  | -2.21319 | -0.91635 |
| H | 4.57240  | -2.60716 | 0.32654  |
| H | 3.39722  | 1.75877  | 0.64571  |

4e\_conformer-067

|   |         |          |          |
|---|---------|----------|----------|
| C | 2.85395 | -2.15303 | -0.15839 |
| C | 0.78014 | -1.21668 | -0.17702 |
| N | 1.56866 | -2.25017 | 0.31099  |
| H | 1.21061 | -3.03532 | 0.83577  |
| C | 2.90209 | -1.01534 | -0.94458 |
| C | 3.90324 | -3.16031 | 0.18150  |

|   |          |          |          |
|---|----------|----------|----------|
| H | 4.05681  | -3.24156 | 1.26518  |
| H | 3.64585  | -4.16222 | -0.18634 |
| H | 4.85553  | -2.87270 | -0.27209 |
| C | -0.62400 | -1.10857 | 0.21622  |
| C | -1.06421 | -1.61697 | 1.45783  |
| C | -1.56936 | -0.51093 | -0.62803 |
| C | -2.40258 | -1.52074 | 1.81986  |
| H | -0.35120 | -2.05494 | 2.14928  |
| C | -2.91211 | -0.40302 | -0.24921 |
| H | -1.28418 | -0.13240 | -1.60203 |
| C | -3.34257 | -0.91382 | 0.98125  |
| H | -2.72739 | -1.91170 | 2.78016  |
| H | -4.37799 | -0.84422 | 1.29043  |
| O | -3.72877 | 0.20682  | -1.15884 |
| C | -5.10972 | 0.33103  | -0.83544 |
| H | -5.57727 | -0.65109 | -0.69547 |
| H | -5.25559 | 0.93300  | 0.06961  |
| H | -5.57177 | 0.83544  | -1.68508 |
| C | 1.60776  | -0.41875 | -0.97097 |
| C | 1.28079  | 0.88316  | -1.65552 |
| H | 2.16636  | 1.20069  | -2.22117 |
| H | 0.48676  | 0.74894  | -2.40114 |
| C | 0.87575  | 2.01849  | -0.69485 |
| H | 0.59689  | 2.89469  | -1.29360 |
| H | -0.02348 | 1.72063  | -0.14066 |
| C | 1.98084  | 2.38996  | 0.29836  |
| H | 2.30596  | 1.47997  | 0.81811  |
| H | 2.85781  | 2.75738  | -0.25599 |
| C | 1.56175  | 3.43766  | 1.33870  |
| H | 0.70111  | 3.05496  | 1.90579  |
| H | 2.37624  | 3.56089  | 2.06508  |
| C | 1.21203  | 4.80589  | 0.74442  |
| H | 2.05019  | 5.20305  | 0.15788  |
| H | 0.34165  | 4.74938  | 0.08154  |
| H | 0.98103  | 5.53235  | 1.53193  |
| H | 3.78285  | -0.63681 | -1.44822 |

4e\_conformer-068

|   |          |         |          |
|---|----------|---------|----------|
| C | -2.25828 | 2.49352 | -0.21996 |
| C | -0.34537 | 1.32206 | 0.15335  |
| N | -0.90802 | 2.43197 | -0.46298 |
| H | -0.41250 | 3.03221 | -1.10659 |
| C | -2.56529 | 1.42133 | 0.59661  |
| C | -3.12129 | 3.56563 | -0.80075 |
| H | -2.78116 | 4.56742 | -0.50896 |

|   |          |          |          |
|---|----------|----------|----------|
| H | -3.13359 | 3.53339  | -1.89809 |
| H | -4.15033 | 3.44487  | -0.45168 |
| C | 1.09409  | 1.07381  | 0.05451  |
| C | 2.00136  | 2.15435  | 0.00559  |
| C | 1.60508  | -0.22843 | -0.01137 |
| C | 3.36675  | 1.91714  | -0.09988 |
| H | 1.63279  | 3.17280  | 0.08006  |
| C | 2.98335  | -0.45943 | -0.09826 |
| H | 0.94120  | -1.08319 | -0.02755 |
| C | 3.87783  | 0.61601  | -0.14732 |
| H | 4.05656  | 2.75596  | -0.13287 |
| H | 4.94649  | 0.45775  | -0.22250 |
| O | 3.35324  | -1.77342 | -0.14905 |
| C | 4.74107  | -2.07018 | -0.26321 |
| H | 4.81305  | -3.15819 | -0.29196 |
| H | 5.16463  | -1.65166 | -1.18422 |
| H | 5.30310  | -1.69000 | 0.59835  |
| C | -1.37109 | 0.67581  | 0.84108  |
| C | -1.28479 | -0.52612 | 1.74207  |
| H | -0.23923 | -0.82014 | 1.88465  |
| H | -1.66511 | -0.25398 | 2.73661  |
| C | -2.10015 | -1.73192 | 1.23322  |
| H | -2.10896 | -2.51137 | 2.00767  |
| H | -3.14200 | -1.41377 | 1.10267  |
| C | -1.56956 | -2.32727 | -0.07411 |
| H | -1.47498 | -1.52850 | -0.82273 |
| H | -0.55455 | -2.71119 | 0.10021  |
| C | -2.43426 | -3.45852 | -0.64900 |
| H | -1.89675 | -3.92237 | -1.48665 |
| H | -2.55580 | -4.24482 | 0.10958  |
| C | -3.81252 | -2.99965 | -1.13692 |
| H | -4.36732 | -3.82897 | -1.59018 |
| H | -4.42329 | -2.60261 | -0.31879 |
| H | -3.71534 | -2.20887 | -1.89133 |
| H | -3.54815 | 1.19991  | 0.99344  |

4e\_conformer-069

|   |         |         |          |
|---|---------|---------|----------|
| C | 2.25847 | 2.49350 | -0.21992 |
| C | 0.34548 | 1.32215 | 0.15331  |
| N | 0.90821 | 2.43205 | -0.46296 |
| H | 0.41270 | 3.03242 | -1.10646 |
| C | 2.56541 | 1.42123 | 0.59658  |
| C | 3.12160 | 3.56550 | -0.80073 |
| H | 3.13434 | 3.53294 | -1.89806 |
| H | 2.78125 | 4.56735 | -0.50938 |

|   |          |          |          |
|---|----------|----------|----------|
| H | 4.15051  | 3.44495  | -0.45121 |
| C | -1.09399 | 1.07396  | 0.05448  |
| C | -2.00125 | 2.15451  | 0.00555  |
| C | -1.60500 | -0.22828 | -0.01135 |
| C | -3.36665 | 1.91730  | -0.09991 |
| H | -1.63267 | 3.17295  | 0.08002  |
| C | -2.98326 | -0.45927 | -0.09824 |
| H | -0.94111 | -1.08304 | -0.02749 |
| C | -3.87774 | 0.61617  | -0.14733 |
| H | -4.05644 | 2.75612  | -0.13292 |
| H | -4.94639 | 0.45793  | -0.22251 |
| O | -3.35316 | -1.77327 | -0.14900 |
| C | -4.74099 | -2.07002 | -0.26318 |
| H | -5.16455 | -1.65149 | -1.18419 |
| H | -4.81297 | -3.15803 | -0.29197 |
| H | -5.30303 | -1.68986 | 0.59838  |
| C | 1.37115  | 0.67579  | 0.84102  |
| C | 1.28474  | -0.52613 | 1.74202  |
| H | 1.66510  | -0.25400 | 2.73654  |
| H | 0.23915  | -0.82005 | 1.88462  |
| C | 2.09996  | -1.73203 | 1.23319  |
| H | 3.14182  | -1.41396 | 1.10251  |
| H | 2.10879  | -2.51141 | 2.00770  |
| C | 1.56921  | -2.32746 | -0.07404 |
| H | 0.55420  | -2.71132 | 0.10041  |
| H | 1.47458  | -1.52877 | -0.82273 |
| C | 2.43382  | -3.45880 | -0.64889 |
| H | 2.55541  | -4.24500 | 0.10978  |
| H | 1.89622  | -3.92274 | -1.48642 |
| C | 3.81204  | -3.00001 | -1.13699 |
| H | 3.71480  | -2.20937 | -1.89154 |
| H | 4.42286  | -2.60281 | -0.31898 |
| H | 4.36682  | -3.82941 | -1.59014 |
| H | 3.54825  | 1.19972  | 0.99339  |

#### 4e\_conformer-070

|   |          |         |          |
|---|----------|---------|----------|
| C | -0.30166 | 3.31917 | 0.02144  |
| C | 0.27690  | 1.12048 | 0.06029  |
| N | 0.73006  | 2.42722 | 0.17942  |
| H | 1.66713  | 2.67907 | 0.45925  |
| C | -1.43803 | 2.57293 | -0.23341 |
| C | -0.09981 | 4.79463 | 0.13815  |
| H | 0.24587  | 5.08386 | 1.13923  |
| H | 0.64222  | 5.16418 | -0.58111 |
| H | -1.04187 | 5.31542 | -0.05315 |

|   |          |          |          |
|---|----------|----------|----------|
| C | 1.20162  | -0.00728 | 0.15986  |
| C | 0.78351  | -1.26088 | 0.65422  |
| C | 2.54141  | 0.14072  | -0.22932 |
| C | 1.68539  | -2.31564 | 0.73457  |
| H | -0.23360 | -1.39338 | 1.00177  |
| C | 3.44709  | -0.92158 | -0.12916 |
| H | 2.90090  | 1.07640  | -0.64607 |
| C | 3.02156  | -2.16625 | 0.35018  |
| H | 1.35249  | -3.27571 | 1.11933  |
| H | 3.70394  | -3.00337 | 0.42937  |
| O | 4.72076  | -0.64704 | -0.53891 |
| C | 5.68058  | -1.69713 | -0.47772 |
| H | 5.82363  | -2.04819 | 0.55132  |
| H | 5.38781  | -2.54319 | -1.11104 |
| H | 6.61369  | -1.27137 | -0.84895 |
| C | -1.08932 | 1.18945  | -0.21249 |
| C | -2.03784 | 0.05377  | -0.47165 |
| H | -2.71269 | 0.33485  | -1.28929 |
| H | -1.48623 | -0.82949 | -0.81649 |
| C | -2.87760 | -0.32794 | 0.76307  |
| H | -2.19998 | -0.52488 | 1.60435  |
| H | -3.48480 | 0.53815  | 1.06106  |
| C | -3.78432 | -1.54633 | 0.54896  |
| H | -3.16693 | -2.41116 | 0.26323  |
| H | -4.25535 | -1.81060 | 1.50626  |
| C | -4.88361 | -1.34364 | -0.50031 |
| H | -5.46826 | -0.44990 | -0.23937 |
| H | -4.43225 | -1.13923 | -1.47950 |
| C | -5.81634 | -2.55183 | -0.61792 |
| H | -5.25845 | -3.45246 | -0.90273 |
| H | -6.31392 | -2.75957 | 0.33741  |
| H | -6.59400 | -2.38770 | -1.37249 |
| H | -2.42299 | 2.97809  | -0.42951 |

4e\_conformer-071

|   |          |          |          |
|---|----------|----------|----------|
| C | 0.30167  | 3.31917  | 0.02144  |
| C | -0.27690 | 1.12049  | 0.06029  |
| N | -0.73006 | 2.42722  | 0.17942  |
| H | -1.66713 | 2.67908  | 0.45925  |
| C | 1.43803  | 2.57293  | -0.23341 |
| C | 0.09981  | 4.79463  | 0.13816  |
| H | -0.64222 | 5.16419  | -0.58110 |
| H | -0.24586 | 5.08386  | 1.13923  |
| H | 1.04188  | 5.31542  | -0.05314 |
| C | -1.20162 | -0.00728 | 0.15986  |

|   |          |          |          |
|---|----------|----------|----------|
| C | -0.78351 | -1.26088 | 0.65421  |
| C | -2.54141 | 0.14072  | -0.22932 |
| C | -1.68539 | -2.31563 | 0.73457  |
| H | 0.23360  | -1.39338 | 1.00177  |
| C | -3.44709 | -0.92157 | -0.12916 |
| H | -2.90090 | 1.07641  | -0.64607 |
| C | -3.02156 | -2.16625 | 0.35018  |
| H | -1.35249 | -3.27571 | 1.11933  |
| H | -3.70394 | -3.00337 | 0.42937  |
| O | -4.72076 | -0.64704 | -0.53891 |
| C | -5.68058 | -1.69713 | -0.47772 |
| H | -5.82363 | -2.04819 | 0.55132  |
| H | -6.61369 | -1.27137 | -0.84895 |
| H | -5.38781 | -2.54319 | -1.11104 |
| C | 1.08932  | 1.18945  | -0.21249 |
| C | 2.03784  | 0.05377  | -0.47165 |
| H | 1.48623  | -0.82949 | -0.81651 |
| H | 2.71270  | 0.33485  | -1.28929 |
| C | 2.87759  | -0.32796 | 0.76306  |
| H | 3.48479  | 0.53813  | 1.06107  |
| H | 2.19996  | -0.52491 | 1.60434  |
| C | 3.78431  | -1.54634 | 0.54895  |
| H | 4.25533  | -1.81063 | 1.50625  |
| H | 3.16693  | -2.41117 | 0.26320  |
| C | 4.88361  | -1.34364 | -0.50030 |
| H | 4.43227  | -1.13921 | -1.47949 |
| H | 5.46826  | -0.44990 | -0.23934 |
| C | 5.81635  | -2.55182 | -0.61792 |
| H | 6.31392  | -2.75958 | 0.33742  |
| H | 5.25845  | -3.45245 | -0.90274 |
| H | 6.59401  | -2.38768 | -1.37248 |
| H | 2.42299  | 2.97809  | -0.42951 |

#### 4e\_conformer-072

|   |          |          |          |
|---|----------|----------|----------|
| C | -0.80301 | 3.40214  | -0.09927 |
| C | -0.06530 | 1.25309  | -0.03879 |
| N | 0.28050  | 2.57626  | -0.27379 |
| H | 1.17396  | 2.87149  | -0.64072 |
| C | -1.85997 | 2.59717  | 0.28480  |
| C | -0.72127 | 4.87654  | -0.32522 |
| H | 0.04160  | 5.34598  | 0.30891  |
| H | -0.47252 | 5.11920  | -1.36667 |
| H | -1.68322 | 5.34220  | -0.09468 |
| C | 0.92815  | 0.18543  | -0.13763 |
| C | 0.56714  | -1.10736 | -0.56914 |

|   |          |          |          |
|---|----------|----------|----------|
| C | 2.27033  | 0.42964  | 0.18671  |
| C | 1.52519  | -2.11092 | -0.64907 |
| H | -0.45324 | -1.30523 | -0.87231 |
| C | 3.23337  | -0.58153 | 0.08681  |
| H | 2.58736  | 1.40156  | 0.55195  |
| C | 2.86402  | -1.86739 | -0.32660 |
| H | 1.23484  | -3.10301 | -0.98390 |
| H | 3.59214  | -2.66530 | -0.40331 |
| O | 4.50396  | -0.21721 | 0.43010  |
| C | 5.52132  | -1.21172 | 0.36864  |
| H | 5.64326  | -1.59581 | -0.65125 |
| H | 6.44163  | -0.71786 | 0.68308  |
| H | 5.30488  | -2.04656 | 1.04602  |
| C | -1.41037 | 1.24286  | 0.32789  |
| C | -2.24513 | 0.06582  | 0.74823  |
| H | -1.59503 | -0.75392 | 1.07211  |
| H | -2.84645 | 0.34692  | 1.62448  |
| C | -3.20386 | -0.43045 | -0.35065 |
| H | -3.77833 | 0.42712  | -0.72403 |
| H | -2.62025 | -0.79318 | -1.20715 |
| C | -4.18457 | -1.51203 | 0.12524  |
| H | -4.80663 | -1.09017 | 0.92734  |
| H | -4.86933 | -1.75515 | -0.69948 |
| C | -3.54282 | -2.81323 | 0.63202  |
| H | -2.89824 | -2.59982 | 1.49462  |
| H | -4.34084 | -3.46734 | 1.00737  |
| C | -2.73950 | -3.56849 | -0.43097 |
| H | -1.87034 | -2.99455 | -0.76900 |
| H | -2.36914 | -4.52326 | -0.04102 |
| H | -3.35733 | -3.78225 | -1.31208 |
| H | -2.85627 | 2.94546  | 0.52749  |

#### 4e\_conformer-073

|   |          |          |          |
|---|----------|----------|----------|
| C | 0.80302  | 3.40214  | -0.09925 |
| C | 0.06530  | 1.25309  | -0.03879 |
| N | -0.28049 | 2.57626  | -0.27378 |
| H | -1.17396 | 2.87150  | -0.64070 |
| C | 1.85997  | 2.59716  | 0.28480  |
| C | 0.72128  | 4.87654  | -0.32519 |
| H | 0.47252  | 5.11922  | -1.36663 |
| H | -0.04159 | 5.34598  | 0.30895  |
| H | 1.68323  | 5.34220  | -0.09465 |
| C | -0.92815 | 0.18544  | -0.13764 |
| C | -0.56715 | -1.10735 | -0.56917 |
| C | -2.27033 | 0.42965  | 0.18671  |



|   |          |          |          |
|---|----------|----------|----------|
| C | -1.52520 | -2.11091 | -0.64910 |
| H | 0.45323  | -1.30523 | -0.87234 |
| C | -3.23337 | -0.58152 | 0.08681  |
| H | -2.58735 | 1.40156  | 0.55196  |
| C | -2.86402 | -1.86739 | -0.32662 |
| H | -1.23486 | -3.10300 | -0.98394 |
| H | -3.59215 | -2.66528 | -0.40333 |
| O | -4.50396 | -0.21721 | 0.43011  |
| C | -5.52132 | -1.21172 | 0.36864  |
| H | -5.64327 | -1.59579 | -0.65125 |
| H | -5.30487 | -2.04656 | 1.04601  |
| H | -6.44162 | -0.71786 | 0.68310  |
| C | 1.41037  | 1.24285  | 0.32787  |
| C | 2.24514  | 0.06581  | 0.74820  |
| H | 2.84647  | 0.34690  | 1.62445  |
| H | 1.59504  | -0.75393 | 1.07209  |
| C | 3.20385  | -0.43047 | -0.35069 |
| H | 2.62022  | -0.79322 | -1.20717 |
| H | 3.77830  | 0.42710  | -0.72410 |
| C | 4.18457  | -1.51203 | 0.12520  |
| H | 4.86930  | -1.75517 | -0.69955 |
| H | 4.80668  | -1.09015 | 0.92725  |
| C | 3.54285  | -2.81321 | 0.63204  |
| H | 4.34089  | -3.46733 | 1.00735  |
| H | 2.89833  | -2.59978 | 1.49467  |
| C | 2.73946  | -3.56849 | -0.43088 |
| H | 1.87027  | -2.99456 | -0.76886 |
| H | 3.35722  | -3.78227 | -1.31203 |
| H | 2.36913  | -4.52326 | -0.04088 |
| H | 2.85628  | 2.94544  | 0.52749  |

#### 4e\_conformer-074

|   |          |          |          |
|---|----------|----------|----------|
| C | -1.75973 | -3.20381 | -0.25308 |
| C | -0.56811 | -1.34608 | 0.30050  |
| N | -0.50396 | -2.66897 | -0.11560 |
| H | 0.35294  | -3.19883 | -0.18723 |
| C | -2.65512 | -2.19485 | 0.05569  |
| C | -1.97913 | -4.62645 | -0.65201 |
| H | -1.52029 | -4.85477 | -1.62249 |
| H | -1.55794 | -5.32818 | 0.07980  |
| H | -3.05051 | -4.82954 | -0.73081 |
| C | 0.65285  | -0.56303 | 0.48610  |
| C | 0.70462  | 0.51447  | 1.39577  |
| C | 1.81218  | -0.87306 | -0.24034 |
| C | 1.87620  | 1.24515  | 1.54872  |

|   |          |          |          |
|---|----------|----------|----------|
| H | -0.16575 | 0.76185  | 1.99087  |
| C | 2.99355  | -0.14175 | -0.06899 |
| H | 1.81342  | -1.66808 | -0.97930 |
| C | 3.03333  | 0.93199  | 0.82770  |
| H | 1.90205  | 2.07265  | 2.25239  |
| H | 3.93384  | 1.51648  | 0.96921  |
| O | 4.04865  | -0.54568 | -0.83661 |
| C | 5.27032  | 0.17663  | -0.72118 |
| H | 5.14007  | 1.22886  | -1.00141 |
| H | 5.67264  | 0.12098  | 0.29749  |
| H | 5.96618  | -0.30010 | -1.41277 |
| C | -1.92378 | -1.02405 | 0.40968  |
| C | -2.54398 | 0.30970  | 0.73188  |
| H | -3.63421 | 0.18717  | 0.76117  |
| H | -2.25979 | 0.64588  | 1.73850  |
| C | -2.19081 | 1.41551  | -0.27748 |
| H | -1.10133 | 1.48302  | -0.36005 |
| H | -2.55995 | 1.12363  | -1.27049 |
| C | -2.76817 | 2.77917  | 0.11043  |
| H | -3.86064 | 2.69515  | 0.19803  |
| H | -2.40041 | 3.05243  | 1.11104  |
| C | -2.42580 | 3.90706  | -0.87350 |
| H | -2.79335 | 3.63849  | -1.87405 |
| H | -2.97293 | 4.81247  | -0.57909 |
| C | -0.92949 | 4.23035  | -0.94818 |
| H | -0.53477 | 4.48302  | 0.04405  |
| H | -0.34832 | 3.38302  | -1.32781 |
| H | -0.74187 | 5.08305  | -1.61054 |
| H | -3.73412 | -2.28207 | 0.02541  |

#### 4e\_conformer-075

|   |          |          |          |
|---|----------|----------|----------|
| C | 2.23342  | -2.69220 | -0.27239 |
| C | 0.38076  | -1.43545 | 0.12636  |
| N | 0.87581  | -2.59483 | -0.45584 |
| H | 0.33008  | -3.20940 | -1.04287 |
| C | 2.61485  | -1.59119 | 0.47125  |
| C | 3.03149  | -3.82301 | -0.83445 |
| H | 2.67550  | -4.79545 | -0.47098 |
| H | 2.98865  | -3.85050 | -1.93114 |
| H | 4.08030  | -3.71883 | -0.54378 |
| C | -1.05270 | -1.14107 | 0.08216  |
| C | -1.99693 | -2.18945 | 0.13149  |
| C | -1.52255 | 0.17382  | -0.02623 |
| C | -3.35714 | -1.90898 | 0.07801  |
| H | -1.65971 | -3.21554 | 0.24114  |

|   |          |          |          |
|---|----------|----------|----------|
| C | -2.89491 | 0.44934  | -0.06083 |
| H | -0.83240 | 1.00270  | -0.11681 |
| C | -3.82619 | -0.59439 | -0.01260 |
| H | -4.07539 | -2.72313 | 0.12057  |
| H | -4.89136 | -0.40194 | -0.04606 |
| O | -3.22255 | 1.77158  | -0.16215 |
| C | -4.60346 | 2.11188  | -0.22864 |
| H | -4.64017 | 3.19894  | -0.31075 |
| H | -5.08369 | 1.66287  | -1.10647 |
| H | -5.13679 | 1.79615  | 0.67612  |
| C | 1.45941  | -0.79183 | 0.73075  |
| C | 1.45504  | 0.45614  | 1.57078  |
| H | 0.42668  | 0.78628  | 1.75411  |
| H | 1.88193  | 0.22351  | 2.55636  |
| C | 2.26948  | 1.61525  | 0.96085  |
| H | 2.33112  | 2.42488  | 1.69856  |
| H | 3.29982  | 1.27218  | 0.79000  |
| C | 1.69491  | 2.14774  | -0.35522 |
| H | 1.51398  | 1.30034  | -1.02919 |
| H | 0.71410  | 2.60751  | -0.16226 |
| C | 2.59366  | 3.16919  | -1.06568 |
| H | 3.56425  | 2.70134  | -1.28376 |
| H | 2.14755  | 3.41710  | -2.03801 |
| C | 2.81690  | 4.46154  | -0.27367 |
| H | 3.34397  | 4.27346  | 0.66813  |
| H | 3.41257  | 5.17991  | -0.84834 |
| H | 1.86016  | 4.93986  | -0.02855 |
| H | 3.62233  | -1.38518 | 0.81047  |

4e\_conformer-076

|   |          |          |          |
|---|----------|----------|----------|
| C | -3.93742 | 0.20752  | -0.24690 |
| C | -1.72935 | -0.33068 | -0.13733 |
| N | -3.03157 | -0.80930 | -0.08305 |
| H | -3.27536 | -1.78875 | -0.05130 |
| C | -3.20388 | 1.37322  | -0.38355 |
| C | -5.41088 | -0.03669 | -0.26801 |
| H | -5.76092 | -0.50842 | 0.65907  |
| H | -5.94338 | 0.91103  | -0.38453 |
| H | -5.70677 | -0.69180 | -1.09783 |
| C | -0.59303 | -1.23098 | 0.04979  |
| C | -0.73153 | -2.43145 | 0.78114  |
| C | 0.66683  | -0.92457 | -0.48238 |
| C | 0.36051  | -3.27146 | 0.96383  |
| H | -1.68329 | -2.68590 | 1.23684  |
| C | 1.76713  | -1.76144 | -0.27089 |

|   |          |          |          |
|---|----------|----------|----------|
| H | 0.81938  | -0.03258 | -1.07512 |
| C | 1.62198  | -2.95178 | 0.45097  |
| H | 0.24013  | -4.18941 | 1.53252  |
| H | 2.45983  | -3.61652 | 0.62072  |
| O | 2.94191  | -1.32732 | -0.81858 |
| C | 4.10015  | -2.13471 | -0.63510 |
| H | 3.97129  | -3.12635 | -1.08536 |
| H | 4.91320  | -1.61002 | -1.13844 |
| H | 4.34239  | -2.24908 | 0.42829  |
| C | -1.81707 | 1.05262  | -0.32205 |
| C | -0.69750 | 2.05847  | -0.36803 |
| H | -0.01865 | 1.84221  | -1.20134 |
| H | -1.12371 | 3.04548  | -0.58820 |
| C | 0.10477  | 2.14912  | 0.94476  |
| H | -0.56301 | 2.53072  | 1.72790  |
| H | 0.40332  | 1.14171  | 1.25789  |
| C | 1.35605  | 3.03243  | 0.85221  |
| H | 1.07928  | 4.03113  | 0.48253  |
| H | 1.75831  | 3.18264  | 1.86401  |
| C | 2.46756  | 2.45349  | -0.03340 |
| H | 2.70212  | 1.43301  | 0.29880  |
| H | 2.11171  | 2.35921  | -1.06763 |
| C | 3.73893  | 3.30583  | -0.01847 |
| H | 4.14600  | 3.38768  | 0.99697  |
| H | 4.51808  | 2.87594  | -0.65826 |
| H | 3.53579  | 4.32299  | -0.37586 |
| H | -3.61945 | 2.36506  | -0.51113 |

4e\_conformer-077

|   |          |          |          |
|---|----------|----------|----------|
| C | 2.06439  | 2.47940  | -0.54722 |
| C | 0.21648  | 1.18807  | -0.23894 |
| N | 0.77194  | 2.45151  | -0.08833 |
| H | 0.25039  | 3.26653  | 0.20135  |
| C | 2.35751  | 1.19765  | -0.97859 |
| C | 2.88558  | 3.72708  | -0.53859 |
| H | 3.88705  | 3.51569  | -0.92288 |
| H | 2.44494  | 4.51351  | -1.16523 |
| H | 2.99260  | 4.13938  | 0.47290  |
| C | -1.15176 | 0.92270  | 0.20227  |
| C | -1.72490 | 1.65695  | 1.25509  |
| C | -1.92654 | -0.06850 | -0.43248 |
| C | -3.03711 | 1.40171  | 1.65746  |
| H | -1.13755 | 2.40269  | 1.78165  |
| C | -3.22998 | -0.32996 | -0.00780 |
| H | -1.50314 | -0.61067 | -1.26583 |

|   |          |          |          |
|---|----------|----------|----------|
| C | -3.79500 | 0.41263  | 1.04040  |
| H | -3.46833 | 1.97324  | 2.47465  |
| H | -4.81203 | 0.19649  | 1.35098  |
| O | -4.03741 | -1.28108 | -0.56314 |
| C | -3.49700 | -2.08914 | -1.60363 |
| H | -4.28268 | -2.79657 | -1.87192 |
| H | -3.23323 | -1.48732 | -2.48174 |
| H | -2.61044 | -2.63768 | -1.26275 |
| C | 1.20728  | 0.37517  | -0.79555 |
| C | 1.16950  | -1.10641 | -1.06966 |
| H | 0.40697  | -1.35348 | -1.82002 |
| H | 2.12601  | -1.38709 | -1.52617 |
| C | 0.92767  | -1.98117 | 0.17748  |
| H | -0.08667 | -1.79941 | 0.55068  |
| H | 0.95741  | -3.03465 | -0.12943 |
| C | 1.91894  | -1.73902 | 1.32429  |
| H | 1.78391  | -0.71519 | 1.69521  |
| H | 1.65789  | -2.40822 | 2.15639  |
| C | 3.39839  | -1.94362 | 0.96630  |
| H | 3.69957  | -1.20197 | 0.21581  |
| H | 4.00346  | -1.73221 | 1.85808  |
| C | 3.72805  | -3.35014 | 0.45765  |
| H | 3.21756  | -3.56865 | -0.48708 |
| H | 4.80414  | -3.46684 | 0.28563  |
| H | 3.42002  | -4.11325 | 1.18360  |
| H | 3.30886  | 0.87330  | -1.38148 |

4e\_conformer-078

|   |          |          |          |
|---|----------|----------|----------|
| C | -2.06486 | 2.47941  | -0.54685 |
| C | -0.21672 | 1.18829  | -0.23909 |
| N | -0.77229 | 2.45166  | -0.08833 |
| H | -0.25081 | 3.26670  | 0.20138  |
| C | -2.35795 | 1.19764  | -0.97817 |
| C | -2.88618 | 3.72701  | -0.53802 |
| H | -2.99300 | 4.13930  | 0.47350  |
| H | -2.44578 | 4.51349  | -1.16477 |
| H | -3.88773 | 3.51551  | -0.92207 |
| C | 1.15165  | 0.92313  | 0.20187  |
| C | 1.72506  | 1.65799  | 1.25413  |
| C | 1.92628  | -0.06846 | -0.43246 |
| C | 3.03735  | 1.40295  | 1.65637  |
| H | 1.13789  | 2.40410  | 1.78036  |
| C | 3.22979  | -0.32972 | -0.00788 |
| H | 1.50273  | -0.61113 | -1.26542 |
| C | 3.79508  | 0.41347  | 1.03974  |

|   |          |          |          |
|---|----------|----------|----------|
| H | 3.46876  | 1.97496  | 2.47312  |
| H | 4.81214  | 0.19745  | 1.35026  |
| O | 4.03705  | -1.28125 | -0.56279 |
| C | 3.49627  | -2.09022 | -1.60239 |
| H | 2.60985  | -2.63849 | -1.26071 |
| H | 3.23217  | -1.48918 | -2.48094 |
| H | 4.28186  | -2.79788 | -1.87035 |
| C | -1.20758 | 0.37528  | -0.79547 |
| C | -1.16966 | -1.10621 | -1.07004 |
| H | -2.12633 | -1.38689 | -1.52623 |
| H | -0.40744 | -1.35279 | -1.82088 |
| C | -0.92711 | -1.98152 | 0.17657  |
| H | -0.95709 | -3.03486 | -0.13081 |
| H | 0.08744  | -1.79999 | 0.54928  |
| C | -1.91768 | -1.73984 | 1.32409  |
| H | -1.65611 | -2.40936 | 2.15577  |
| H | -1.78233 | -0.71615 | 1.69530  |
| C | -3.39736 | -1.94426 | 0.96696  |
| H | -4.00187 | -1.73304 | 1.85917  |
| H | -3.69896 | -1.20240 | 0.21685  |
| C | -3.72742 | -3.35063 | 0.45816  |
| H | -3.41905 | -4.11394 | 1.18376  |
| H | -4.80361 | -3.46720 | 0.28671  |
| H | -3.21747 | -3.56895 | -0.48691 |
| H | -3.30934 | 0.87320  | -1.38089 |

#### 4e\_conformer-079

|   |          |          |          |
|---|----------|----------|----------|
| C | 0.53985  | 2.96650  | -0.31780 |
| C | -0.14249 | 0.84677  | 0.14381  |
| N | -0.43458 | 2.02302  | -0.53432 |
| H | -1.18558 | 2.11665  | -1.20329 |
| C | 1.45892  | 2.39911  | 0.54469  |
| C | 0.49952  | 4.31177  | -0.96601 |
| H | 1.34574  | 4.91452  | -0.62551 |
| H | 0.55636  | 4.24234  | -2.06025 |
| H | -0.42213 | 4.85549  | -0.72244 |
| C | -1.06414 | -0.28939 | 0.08452  |
| C | -0.60144 | -1.61460 | 0.07931  |
| C | -2.45309 | -0.05218 | 0.01310  |
| C | -1.51004 | -2.67330 | 0.02103  |
| H | 0.46259  | -1.81336 | 0.08541  |
| C | -3.35137 | -1.11869 | -0.06375 |
| H | -2.81437 | 0.96814  | 0.05122  |
| C | -2.87871 | -2.43984 | -0.05309 |
| H | -1.14211 | -3.69561 | 0.01615  |

|   |          |          |          |
|---|----------|----------|----------|
| H | -3.59372 | -3.25442 | -0.10673 |
| O | -4.70730 | -0.97584 | -0.13691 |
| C | -5.24031 | 0.34428  | -0.15927 |
| H | -4.86867 | 0.91009  | -1.02213 |
| H | -6.32203 | 0.22886  | -0.23836 |
| H | -4.99796 | 0.88882  | 0.76136  |
| C | 1.04254  | 1.06536  | 0.84423  |
| C | 1.74441  | 0.14571  | 1.80603  |
| H | 1.83234  | 0.64745  | 2.77988  |
| H | 1.14188  | -0.75279 | 1.97843  |
| C | 3.15992  | -0.25977 | 1.34877  |
| H | 3.75378  | 0.65068  | 1.18724  |
| H | 3.65320  | -0.81019 | 2.16160  |
| C | 3.18364  | -1.10683 | 0.07478  |
| H | 2.66179  | -2.05733 | 0.26024  |
| H | 2.61716  | -0.59218 | -0.71339 |
| C | 4.59845  | -1.40545 | -0.42974 |
| H | 5.11861  | -0.45676 | -0.62312 |
| H | 5.16832  | -1.91048 | 0.36290  |
| C | 4.60971  | -2.26444 | -1.69663 |
| H | 5.63137  | -2.46100 | -2.04113 |
| H | 4.12362  | -3.23186 | -1.51997 |
| H | 4.07028  | -1.76771 | -2.51251 |
| H | 2.33774  | 2.89617  | 0.93599  |

#### 4e\_conformer-080

|   |          |          |          |
|---|----------|----------|----------|
| C | -0.53985 | 2.96650  | -0.31779 |
| C | 0.14249  | 0.84677  | 0.14381  |
| N | 0.43458  | 2.02302  | -0.53431 |
| H | 1.18558  | 2.11665  | -1.20329 |
| C | -1.45892 | 2.39911  | 0.54469  |
| C | -0.49951 | 4.31177  | -0.96601 |
| H | 0.42214  | 4.85548  | -0.72244 |
| H | -0.55636 | 4.24234  | -2.06025 |
| H | -1.34573 | 4.91453  | -0.62550 |
| C | 1.06413  | -0.28939 | 0.08452  |
| C | 0.60144  | -1.61460 | 0.07933  |
| C | 2.45308  | -0.05218 | 0.01310  |
| C | 1.51004  | -2.67330 | 0.02105  |
| H | -0.46259 | -1.81337 | 0.08543  |
| C | 3.35137  | -1.11869 | -0.06375 |
| H | 2.81436  | 0.96814  | 0.05121  |
| C | 2.87871  | -2.43984 | -0.05309 |
| H | 1.14211  | -3.69561 | 0.01617  |
| H | 3.59372  | -3.25442 | -0.10672 |

|   |          |          |          |
|---|----------|----------|----------|
| O | 4.70730  | -0.97584 | -0.13691 |
| C | 5.24031  | 0.34428  | -0.15928 |
| H | 4.86866  | 0.91009  | -1.02214 |
| H | 4.99796  | 0.88882  | 0.76135  |
| H | 6.32202  | 0.22886  | -0.23838 |
| C | -1.04255 | 1.06536  | 0.84424  |
| C | -1.74442 | 0.14571  | 1.80604  |
| H | -1.14189 | -0.75279 | 1.97844  |
| H | -1.83235 | 0.64745  | 2.77988  |
| C | -3.15992 | -0.25977 | 1.34876  |
| H | -3.65321 | -0.81018 | 2.16160  |
| H | -3.75378 | 0.65069  | 1.18723  |
| C | -3.18364 | -1.10683 | 0.07478  |
| H | -2.61716 | -0.59218 | -0.71340 |
| H | -2.66179 | -2.05733 | 0.26024  |
| C | -4.59844 | -1.40544 | -0.42975 |
| H | -5.16832 | -1.91048 | 0.36289  |
| H | -5.11860 | -0.45676 | -0.62314 |
| C | -4.60970 | -2.26444 | -1.69663 |
| H | -4.07027 | -1.76772 | -2.51252 |
| H | -4.12362 | -3.23186 | -1.51998 |
| H | -5.63136 | -2.46100 | -2.04114 |
| H | -2.33774 | 2.89617  | 0.93599  |

4e\_conformer-081

|   |          |          |          |
|---|----------|----------|----------|
| C | 2.25081  | -2.42282 | -0.05314 |
| C | 0.68387  | -0.90035 | 0.57219  |
| N | 0.90622  | -2.18966 | 0.10892  |
| H | 0.18835  | -2.89694 | 0.03900  |
| C | 2.90228  | -1.24953 | 0.27899  |
| C | 2.77747  | -3.74956 | -0.49360 |
| H | 2.54100  | -4.54535 | 0.22493  |
| H | 2.36133  | -4.05289 | -1.46276 |
| H | 3.86518  | -3.70345 | -0.59441 |
| C | -0.67646 | -0.40390 | 0.78626  |
| C | -0.98687 | 0.43374  | 1.86896  |
| C | -1.70008 | -0.76911 | -0.11173 |
| C | -2.28804 | 0.91379  | 2.03104  |
| H | -0.21932 | 0.68487  | 2.59212  |
| C | -3.00209 | -0.29773 | 0.07071  |
| H | -1.45256 | -1.39065 | -0.96344 |
| C | -3.29783 | 0.55575  | 1.14456  |
| H | -2.52025 | 1.56382  | 2.86999  |
| H | -4.31403 | 0.91763  | 1.26317  |
| O | -4.04887 | -0.59856 | -0.75225 |



|   |          |          |          |
|---|----------|----------|----------|
| C | -3.80106 | -1.45579 | -1.86197 |
| H | -3.07295 | -1.01390 | -2.55289 |
| H | -3.43875 | -2.43779 | -1.53462 |
| H | -4.75927 | -1.57228 | -2.36982 |
| C | 1.92768  | -0.28253 | 0.67639  |
| C | 2.21404  | 1.16007  | 0.98924  |
| H | 1.30020  | 1.65991  | 1.32175  |
| H | 2.92209  | 1.22949  | 1.82665  |
| C | 2.80361  | 1.93126  | -0.21008 |
| H | 3.01584  | 2.96041  | 0.10739  |
| H | 3.77112  | 1.48777  | -0.47919 |
| C | 1.90551  | 1.94061  | -1.45556 |
| H | 2.41564  | 2.50685  | -2.24788 |
| H | 1.80393  | 0.91188  | -1.82396 |
| C | 0.50137  | 2.52934  | -1.24781 |
| H | -0.03913 | 2.47695  | -2.20257 |
| H | -0.06278 | 1.90205  | -0.54838 |
| C | 0.49861  | 3.97702  | -0.74819 |
| H | 0.94009  | 4.06020  | 0.25145  |
| H | 1.07363  | 4.62852  | -1.41849 |
| H | -0.52194 | 4.37263  | -0.69071 |
| H | 3.97299  | -1.09524 | 0.23062  |

#### 4e\_conformer-082

|   |          |          |          |
|---|----------|----------|----------|
| C | 1.07237  | 2.82066  | -0.15280 |
| C | -0.02551 | 0.85409  | 0.16190  |
| N | -0.08564 | 2.12446  | -0.39415 |
| H | -0.83378 | 2.44736  | -0.99069 |
| C | 1.88566  | 1.99162  | 0.59821  |
| C | 1.29059  | 4.20371  | -0.67317 |
| H | 0.51675  | 4.89904  | -0.32371 |
| H | 2.25931  | 4.58033  | -0.33395 |
| H | 1.28432  | 4.23520  | -1.77057 |
| C | -1.16994 | -0.05209 | 0.07866  |
| C | -1.00497 | -1.45306 | 0.06355  |
| C | -2.47305 | 0.46351  | 0.00403  |
| C | -2.11497 | -2.28652 | -0.01271 |
| H | -0.01074 | -1.88091 | 0.08033  |
| C | -3.58404 | -0.38221 | -0.08972 |
| H | -2.65300 | 1.53305  | 0.04804  |
| C | -3.41243 | -1.77165 | -0.09277 |
| H | -1.97436 | -3.36385 | -0.02633 |
| H | -4.25849 | -2.44438 | -0.15769 |
| O | -4.79510 | 0.24564  | -0.15810 |
| C | -5.96228 | -0.56641 | -0.23551 |

|   |          |          |          |
|---|----------|----------|----------|
| H | -5.95673 | -1.18892 | -1.13834 |
| H | -6.80522 | 0.12466  | -0.27632 |
| H | -6.06026 | -1.21014 | 0.64693  |
| C | 1.21126  | 0.74990  | 0.80135  |
| C | 1.73820  | -0.41051 | 1.59970  |
| H | 2.29929  | -0.02486 | 2.46193  |
| H | 0.90053  | -0.98702 | 2.00901  |
| C | 2.66107  | -1.36452 | 0.81193  |
| H | 2.89378  | -2.23064 | 1.44779  |
| H | 2.11665  | -1.75328 | -0.05759 |
| C | 3.97019  | -0.71691 | 0.35006  |
| H | 3.74315  | 0.12776  | -0.31339 |
| H | 4.48024  | -0.29100 | 1.22606  |
| C | 4.92630  | -1.68091 | -0.36669 |
| H | 5.16020  | -2.52320 | 0.29996  |
| H | 5.87698  | -1.16283 | -0.55034 |
| C | 4.38684  | -2.21746 | -1.69689 |
| H | 4.12896  | -1.39360 | -2.37427 |
| H | 5.13057  | -2.84508 | -2.20091 |
| H | 3.48537  | -2.82360 | -1.55522 |
| H | 2.86508  | 2.25219  | 0.97827  |

4e\_conformer-083

|   |          |          |          |
|---|----------|----------|----------|
| C | -3.68398 | -0.55034 | -0.29047 |
| C | -1.45443 | -0.82009 | 0.06461  |
| N | -2.61922 | -1.40928 | -0.40779 |
| H | -2.65278 | -2.30127 | -0.88011 |
| C | -3.20105 | 0.60566  | 0.29613  |
| C | -5.05478 | -0.91743 | -0.75689 |
| H | -5.43058 | -1.81813 | -0.25479 |
| H | -5.75041 | -0.10058 | -0.54675 |
| H | -5.08247 | -1.11205 | -1.83701 |
| C | -0.19099 | -1.55505 | 0.07361  |
| C | -0.17858 | -2.96107 | 0.20632  |
| C | 1.03590  | -0.88977 | -0.05535 |
| C | 1.02592  | -3.65382 | 0.20880  |
| H | -1.11098 | -3.50122 | 0.33851  |
| C | 2.24586  | -1.59367 | -0.03408 |
| H | 1.07612  | 0.18187  | -0.20464 |
| C | 2.25046  | -2.98729 | 0.09441  |
| H | 1.02247  | -4.73510 | 0.31537  |
| H | 3.17546  | -3.55025 | 0.10572  |
| O | 3.36878  | -0.82661 | -0.16353 |
| C | 4.62923  | -1.48856 | -0.17569 |
| H | 4.80698  | -2.02679 | 0.76313  |

|   |          |          |          |
|---|----------|----------|----------|
| H | 4.70335  | -2.19106 | -1.01462 |
| H | 5.37808  | -0.70397 | -0.29158 |
| C | -1.80168 | 0.45006  | 0.52546  |
| C | -0.90504 | 1.46927  | 1.16791  |
| H | -1.44856 | 1.97235  | 1.97909  |
| H | -0.04625 | 0.97141  | 1.63498  |
| C | -0.39097 | 2.54018  | 0.18814  |
| H | 0.09049  | 2.04305  | -0.66319 |
| H | -1.24802 | 3.08793  | -0.22800 |
| C | 0.58198  | 3.52279  | 0.84555  |
| H | 0.08668  | 3.98696  | 1.70997  |
| H | 1.43974  | 2.96318  | 1.24794  |
| C | 1.09612  | 4.62504  | -0.09125 |
| H | 0.24091  | 5.18969  | -0.48882 |
| H | 1.68870  | 5.33931  | 0.49558  |
| C | 1.94940  | 4.10406  | -1.25257 |
| H | 2.79939  | 3.51819  | -0.88041 |
| H | 1.37203  | 3.45909  | -1.92385 |
| H | 2.34871  | 4.93046  | -1.85138 |
| H | -3.79497 | 1.47496  | 0.54975  |

4e\_conformer-084

|   |          |          |          |
|---|----------|----------|----------|
| C | -0.61833 | 3.42010  | 0.24289  |
| C | 0.47889  | 1.44962  | -0.04757 |
| N | 0.60898  | 2.80526  | 0.22141  |
| H | 1.47749  | 3.25163  | 0.47845  |
| C | -1.55706 | 2.44608  | -0.04629 |
| C | -0.77199 | 4.87504  | 0.54420  |
| H | -0.41808 | 5.12504  | 1.55292  |
| H | -0.21049 | 5.50059  | -0.16144 |
| H | -1.82584 | 5.15898  | 0.48013  |
| C | 1.65415  | 0.58745  | -0.15191 |
| C | 2.89272  | 1.10339  | -0.57286 |
| C | 1.56748  | -0.78036 | 0.17661  |
| C | 4.00797  | 0.26904  | -0.66192 |
| H | 2.97762  | 2.14663  | -0.86098 |
| C | 2.68458  | -1.60991 | 0.06340  |
| H | 0.63321  | -1.17310 | 0.54886  |
| C | 3.91646  | -1.08446 | -0.35375 |
| H | 4.95917  | 0.67838  | -0.99069 |
| H | 4.77426  | -1.74501 | -0.42733 |
| O | 2.67418  | -2.94419 | 0.35485  |
| C | 1.44031  | -3.52848 | 0.75989  |
| H | 0.67112  | -3.41158 | -0.01332 |
| H | 1.64640  | -4.58882 | 0.91111  |

|   |          |          |          |
|---|----------|----------|----------|
| H | 1.07762  | -3.09011 | 1.69750  |
| C | -0.88237 | 1.20294  | -0.23145 |
| C | -1.54733 | -0.09676 | -0.58625 |
| H | -2.36198 | 0.10458  | -1.29270 |
| H | -0.84231 | -0.75433 | -1.10990 |
| C | -2.12011 | -0.83992 | 0.63611  |
| H | -1.32962 | -0.95581 | 1.38933  |
| H | -2.88478 | -0.20894 | 1.10648  |
| C | -2.69824 | -2.22329 | 0.30750  |
| H | -1.88825 | -2.86624 | -0.06602 |
| H | -3.05315 | -2.68588 | 1.23916  |
| C | -3.84424 | -2.22811 | -0.71629 |
| H | -3.47471 | -1.87842 | -1.68902 |
| H | -4.16536 | -3.26646 | -0.87169 |
| C | -5.05212 | -1.38444 | -0.29783 |
| H | -5.87118 | -1.48272 | -1.01912 |
| H | -5.42963 | -1.69785 | 0.68360  |
| H | -4.79823 | -0.32058 | -0.22998 |
| H | -2.62431 | 2.60924  | -0.13092 |

4e\_conformer-085

|   |          |          |          |
|---|----------|----------|----------|
| C | 0.61830  | 3.42010  | 0.24289  |
| C | -0.47890 | 1.44962  | -0.04757 |
| N | -0.60900 | 2.80526  | 0.22141  |
| H | -1.47752 | 3.25162  | 0.47846  |
| C | 1.55703  | 2.44610  | -0.04629 |
| C | 0.77195  | 4.87505  | 0.54420  |
| H | 0.21048  | 5.50059  | -0.16146 |
| H | 0.41799  | 5.12505  | 1.55291  |
| H | 1.82580  | 5.15899  | 0.48018  |
| C | -1.65416 | 0.58744  | -0.15191 |
| C | -2.89272 | 1.10337  | -0.57288 |
| C | -1.56748 | -0.78037 | 0.17662  |
| C | -4.00797 | 0.26901  | -0.66193 |
| H | -2.97763 | 2.14661  | -0.86099 |
| C | -2.68458 | -1.60992 | 0.06340  |
| H | -0.63320 | -1.17310 | 0.54887  |
| C | -3.91645 | -1.08448 | -0.35375 |
| H | -4.95917 | 0.67834  | -0.99072 |
| H | -4.77424 | -1.74504 | -0.42734 |
| O | -2.67417 | -2.94421 | 0.35486  |
| C | -1.44030 | -3.52849 | 0.75990  |
| H | -0.67111 | -3.41158 | -0.01330 |
| H | -1.07762 | -3.09013 | 1.69751  |
| H | -1.64638 | -4.58884 | 0.91111  |

|   |         |          |          |
|---|---------|----------|----------|
| C | 0.88236 | 1.20294  | -0.23144 |
| C | 1.54733 | -0.09674 | -0.58625 |
| H | 0.84231 | -0.75433 | -1.10989 |
| H | 2.36197 | 0.10460  | -1.29271 |
| C | 2.12013 | -0.83990 | 0.63611  |
| H | 2.88480 | -0.20891 | 1.10646  |
| H | 1.32966 | -0.95579 | 1.38934  |
| C | 2.69827 | -2.22327 | 0.30750  |
| H | 3.05317 | -2.68585 | 1.23916  |
| H | 1.88827 | -2.86621 | -0.06601 |
| C | 3.84426 | -2.22809 | -0.71630 |
| H | 4.16538 | -3.26643 | -0.87171 |
| H | 3.47473 | -1.87838 | -1.68902 |
| C | 5.05215 | -1.38443 | -0.29783 |
| H | 4.79827 | -0.32056 | -0.22997 |
| H | 5.42966 | -1.69786 | 0.68359  |
| H | 5.87120 | -1.48270 | -1.01913 |
| H | 2.62429 | 2.60927  | -0.13091 |

4e\_conformer-086

|   |          |          |          |
|---|----------|----------|----------|
| C | 0.91151  | 3.23627  | -0.15456 |
| C | -0.40979 | 1.40494  | 0.11267  |
| N | -0.33471 | 2.70341  | -0.37136 |
| H | -1.06243 | 3.14953  | -0.91101 |
| C | 1.64722  | 2.27035  | 0.50805  |
| C | 1.27856  | 4.61017  | -0.61167 |
| H | 2.30198  | 4.84292  | -0.30547 |
| H | 1.22520  | 4.70739  | -1.70393 |
| H | 0.61638  | 5.37407  | -0.18456 |
| C | -1.66018 | 0.65163  | 0.03829  |
| C | -2.90051 | 1.31443  | 0.05476  |
| C | -1.64590 | -0.75405 | -0.05813 |
| C | -4.08816 | 0.58590  | -0.02438 |
| H | -2.93855 | 2.39396  | 0.16220  |
| C | -2.84081 | -1.47391 | -0.11728 |
| H | -0.69770 | -1.26658 | -0.11794 |
| C | -4.07240 | -0.80278 | -0.10550 |
| H | -5.04033 | 1.10889  | -0.00851 |
| H | -4.98906 | -1.38094 | -0.16041 |
| O | -2.90529 | -2.83521 | -0.20510 |
| C | -1.68012 | -3.56115 | -0.21232 |
| H | -1.10011 | -3.37471 | 0.69967  |
| H | -1.95699 | -4.61510 | -0.25912 |
| H | -1.06877 | -3.30539 | -1.08628 |
| C | 0.83201  | 1.11123  | 0.68028  |

|   |         |          |          |
|---|---------|----------|----------|
| C | 1.24094 | -0.14815 | 1.39368  |
| H | 1.89600 | 0.11619  | 2.23497  |
| H | 0.35704 | -0.62712 | 1.83106  |
| C | 1.98220 | -1.18107 | 0.51735  |
| H | 2.11148 | -2.09769 | 1.10654  |
| H | 1.35616 | -1.45094 | -0.34490 |
| C | 3.34073 | -0.69501 | 0.00361  |
| H | 3.19695 | 0.24606  | -0.54099 |
| H | 3.98721 | -0.45908 | 0.86241  |
| C | 4.05855 | -1.69680 | -0.91203 |
| H | 3.41641 | -1.91676 | -1.77691 |
| H | 4.96183 | -1.22036 | -1.31575 |
| C | 4.45192 | -3.00758 | -0.22300 |
| H | 5.08056 | -2.81412 | 0.65537  |
| H | 3.57377 | -3.56835 | 0.11547  |
| H | 5.01644 | -3.65690 | -0.90185 |
| H | 2.66723 | 2.38636  | 0.85130  |

4e\_conformer-087

|   |          |          |          |
|---|----------|----------|----------|
| C | -3.67711 | 0.70697  | -0.18588 |
| C | -1.61817 | -0.26024 | -0.11208 |
| N | -2.96669 | -0.40600 | 0.18485  |
| H | -3.38446 | -1.26445 | 0.51395  |
| C | -2.76254 | 1.60265  | -0.71150 |
| C | -5.15780 | 0.79935  | -0.01208 |
| H | -5.68822 | 0.03475  | -0.59461 |
| H | -5.45522 | 0.67321  | 1.03680  |
| H | -5.51122 | 1.77851  | -0.34615 |
| C | -0.66501 | -1.31630 | 0.22410  |
| C | -0.93584 | -2.23230 | 1.25638  |
| C | 0.54768  | -1.43915 | -0.48396 |
| C | -0.01891 | -3.23869 | 1.56398  |
| H | -1.84314 | -2.14006 | 1.84493  |
| C | 1.46825  | -2.43347 | -0.15122 |
| H | 0.75094  | -0.76118 | -1.29948 |
| C | 1.18366  | -3.34774 | 0.87427  |
| H | -0.23999 | -3.93761 | 2.36589  |
| H | 1.91104  | -4.11664 | 1.11336  |
| O | 2.66993  | -2.59958 | -0.77902 |
| C | 3.03661  | -1.65301 | -1.77750 |
| H | 3.06445  | -0.63492 | -1.36965 |
| H | 4.03508  | -1.93997 | -2.10991 |
| H | 2.34720  | -1.68116 | -2.62995 |
| C | -1.46721 | 1.00989  | -0.67807 |
| C | -0.20112 | 1.70434  | -1.10567 |

|   |          |         |          |
|---|----------|---------|----------|
| H | 0.30627  | 1.14680 | -1.90523 |
| H | -0.47203 | 2.66929 | -1.55273 |
| C | 0.79550  | 1.95181 | 0.04004  |
| H | 0.31308  | 2.59212 | 0.78860  |
| H | 1.01764  | 1.00178 | 0.54133  |
| C | 2.10486  | 2.58114 | -0.44432 |
| H | 2.51930  | 1.95394 | -1.24713 |
| H | 1.89525  | 3.56065 | -0.89935 |
| C | 3.16612  | 2.74569 | 0.65239  |
| H | 3.39061  | 1.75973 | 1.08374  |
| H | 4.09882  | 3.09858 | 0.19266  |
| C | 2.76260  | 3.71203 | 1.77055  |
| H | 2.51733  | 4.70097 | 1.36313  |
| H | 1.88514  | 3.35288 | 2.31929  |
| H | 3.57546  | 3.84055 | 2.49427  |
| H | -2.99540 | 2.59318 | -1.08210 |

#### 4e\_conformer-088

|   |          |          |          |
|---|----------|----------|----------|
| C | 1.25793  | 3.39129  | -0.22053 |
| C | -0.11412 | 1.60328  | 0.07986  |
| N | -0.02480 | 2.91948  | -0.35218 |
| H | -0.77435 | 3.41814  | -0.80971 |
| C | 2.00404  | 2.36772  | 0.33525  |
| C | 1.64351  | 4.77052  | -0.64549 |
| H | 1.49130  | 4.92609  | -1.72157 |
| H | 1.06100  | 5.53848  | -0.12061 |
| H | 2.70099  | 4.94446  | -0.42919 |
| C | -1.39221 | 0.89418  | 0.06520  |
| C | -2.60589 | 1.59818  | 0.22564  |
| C | -1.44857 | -0.49451 | -0.11532 |
| C | -3.81768 | 0.91859  | 0.20430  |
| H | -2.59211 | 2.67003  | 0.39747  |
| C | -2.67280 | -1.17382 | -0.11759 |
| H | -0.54780 | -1.07064 | -0.28722 |
| C | -3.87202 | -0.46932 | 0.03848  |
| H | -4.74464 | 1.47073  | 0.33241  |
| H | -4.82921 | -0.97572 | 0.03202  |
| O | -2.58976 | -2.52538 | -0.29736 |
| C | -3.80401 | -3.26798 | -0.33251 |
| H | -4.44844 | -2.94117 | -1.15757 |
| H | -3.51429 | -4.30804 | -0.48786 |
| H | -4.35381 | -3.17961 | 0.61225  |
| C | 1.15456  | 1.23799  | 0.52996  |
| C | 1.57484  | -0.07181 | 1.13305  |
| H | 2.26749  | 0.11786  | 1.96442  |

|   |         |          |          |
|---|---------|----------|----------|
| H | 0.70651 | -0.58323 | 1.56614  |
| C | 2.26819 | -1.01344 | 0.13134  |
| H | 1.60257 | -1.18885 | -0.72587 |
| H | 3.15253 | -0.50504 | -0.27247 |
| C | 2.65973 | -2.35594 | 0.75541  |
| H | 3.35582 | -2.17865 | 1.58871  |
| H | 1.76291 | -2.81281 | 1.19742  |
| C | 3.29113 | -3.34998 | -0.22955 |
| H | 3.43036 | -4.31240 | 0.28049  |
| H | 2.58625 | -3.53807 | -1.05181 |
| C | 4.63492 | -2.89033 | -0.80432 |
| H | 4.53028 | -1.97749 | -1.40085 |
| H | 5.35278 | -2.68135 | -0.00113 |
| H | 5.07150 | -3.65953 | -1.45143 |
| H | 3.05477 | 2.42576  | 0.59093  |

4e\_conformer-089

|   |          |          |          |
|---|----------|----------|----------|
| C | -1.65896 | 2.67993  | -0.28982 |
| C | -0.35787 | 0.88815  | 0.22756  |
| N | -0.43336 | 2.08781  | -0.46840 |
| H | 0.27054  | 2.40966  | -1.11708 |
| C | -2.37634 | 1.86156  | 0.56292  |
| C | -2.02492 | 3.96362  | -0.96041 |
| H | -1.33311 | 4.77415  | -0.69790 |
| H | -2.01737 | 3.87143  | -2.05437 |
| H | -3.03036 | 4.26834  | -0.65782 |
| C | 0.86562  | 0.08608  | 0.18789  |
| C | 0.82811  | -1.32347 | 0.21727  |
| C | 2.11492  | 0.71666  | 0.09221  |
| C | 2.00946  | -2.05451 | 0.16512  |
| H | -0.12339 | -1.83749 | 0.24981  |
| C | 3.29887  | -0.02695 | 0.02342  |
| H | 2.19292  | 1.79942  | 0.09658  |
| C | 3.25434  | -1.42562 | 0.06593  |
| H | 1.96776  | -3.14007 | 0.18529  |
| H | 4.15837  | -2.02007 | 0.02037  |
| O | 4.44751  | 0.70590  | -0.06923 |
| C | 5.68390  | 0.00149  | -0.12358 |
| H | 5.73522  | -0.64793 | -1.00578 |
| H | 6.46031  | 0.76479  | -0.18907 |
| H | 5.83979  | -0.60162 | 0.77897  |
| C | -1.57176 | 0.72925  | 0.89412  |
| C | -1.97773 | -0.35422 | 1.85555  |
| H | -1.12711 | -1.01034 | 2.07027  |
| H | -2.24332 | 0.11737  | 2.81237  |



|   |          |          |          |
|---|----------|----------|----------|
| C | -3.18601 | -1.21107 | 1.41735  |
| H | -3.53343 | -1.76597 | 2.29886  |
| H | -4.01175 | -0.54581 | 1.12932  |
| C | -2.92710 | -2.22010 | 0.28862  |
| H | -2.05239 | -2.83510 | 0.54957  |
| H | -3.77540 | -2.91860 | 0.24845  |
| C | -2.73302 | -1.62433 | -1.11136 |
| H | -3.61435 | -1.01882 | -1.36541 |
| H | -1.88316 | -0.93528 | -1.11221 |
| C | -2.51894 | -2.70253 | -2.17643 |
| H | -3.36554 | -3.39963 | -2.21323 |
| H | -2.40166 | -2.26421 | -3.17414 |
| H | -1.61679 | -3.28948 | -1.96231 |
| H | -3.37772 | 2.05982  | 0.92399  |

4e\_conformer-090

|   |          |          |          |
|---|----------|----------|----------|
| C | -3.95503 | -0.16957 | -0.06287 |
| C | -1.69735 | -0.43921 | -0.14318 |
| N | -2.91645 | -1.04508 | 0.12822  |
| H | -3.02890 | -2.02833 | 0.32947  |
| C | -3.39162 | 1.03680  | -0.44159 |
| C | -5.38083 | -0.57386 | 0.12412  |
| H | -5.57195 | -0.94304 | 1.13985  |
| H | -6.03632 | 0.28352  | -0.05059 |
| H | -5.67695 | -1.36952 | -0.57200 |
| C | -0.44189 | -1.16685 | 0.03665  |
| C | -0.34965 | -2.23564 | 0.95510  |
| C | 0.71044  | -0.80788 | -0.67615 |
| C | 0.85964  | -2.89348 | 1.14623  |
| H | -1.21327 | -2.52147 | 1.54730  |
| C | 1.93046  | -1.45491 | -0.45668 |
| H | 0.68606  | -0.01358 | -1.41128 |
| C | 2.01514  | -2.51248 | 0.45623  |
| H | 0.91800  | -3.70916 | 1.86162  |
| H | 2.94920  | -3.02927 | 0.63800  |
| O | 2.98260  | -0.97929 | -1.18843 |
| C | 4.25708  | -1.58212 | -0.98858 |
| H | 4.59145  | -1.46982 | 0.04962  |
| H | 4.24122  | -2.64661 | -1.25161 |
| H | 4.94452  | -1.05442 | -1.65080 |
| C | -1.97663 | 0.88400  | -0.50012 |
| C | -0.99699 | 1.98008  | -0.82766 |
| H | -0.43785 | 1.73278  | -1.74104 |
| H | -1.55639 | 2.89236  | -1.06933 |
| C | 0.00961  | 2.27910  | 0.30014  |

|   |          |         |          |
|---|----------|---------|----------|
| H | -0.50773 | 2.79191 | 1.12239  |
| H | 0.37087  | 1.33218 | 0.70872  |
| C | 1.20396  | 3.11273 | -0.17269 |
| H | 1.62536  | 2.64526 | -1.07551 |
| H | 0.85767  | 4.11001 | -0.47820 |
| C | 2.32289  | 3.25236 | 0.86983  |
| H | 3.07464  | 3.95564 | 0.48760  |
| H | 1.91775  | 3.70522 | 1.78590  |
| C | 3.01051  | 1.92455 | 1.21313  |
| H | 3.36665  | 1.42015 | 0.30641  |
| H | 3.87096  | 2.08537 | 1.87271  |
| H | 2.33072  | 1.23239 | 1.72126  |
| H | -3.93984 | 1.94670 | -0.65204 |

4e\_conformer-091

|   |          |          |          |
|---|----------|----------|----------|
| C | -0.77416 | 3.45676  | -0.26589 |
| C | -0.05026 | 1.38493  | 0.33542  |
| N | 0.31303  | 2.62564  | -0.17052 |
| H | 1.26811  | 2.91522  | -0.32554 |
| C | -1.86851 | 2.72636  | 0.16270  |
| C | -0.65758 | 4.86729  | -0.74350 |
| H | -0.01476 | 5.47086  | -0.08940 |
| H | -0.23571 | 4.92326  | -1.75512 |
| H | -1.64534 | 5.33545  | -0.76504 |
| C | 0.94679  | 0.32765  | 0.49763  |
| C | 0.80041  | -0.67862 | 1.47575  |
| C | 2.08731  | 0.29779  | -0.31879 |
| C | 1.76487  | -1.66972 | 1.60905  |
| H | -0.05559 | -0.66705 | 2.13918  |
| C | 3.06152  | -0.69620 | -0.16864 |
| H | 2.22788  | 1.02704  | -1.11043 |
| C | 2.90465  | -1.69548 | 0.79849  |
| H | 1.64062  | -2.43799 | 2.36728  |
| H | 3.64212  | -2.47799 | 0.92648  |
| O | 4.12140  | -0.61195 | -1.02614 |
| C | 5.13112  | -1.61188 | -0.93567 |
| H | 4.72261  | -2.61061 | -1.13161 |
| H | 5.86729  | -1.36380 | -1.70136 |
| H | 5.61294  | -1.60532 | 0.04945  |
| C | -1.43073 | 1.42596  | 0.54873  |
| C | -2.34424 | 0.31396  | 0.99148  |
| H | -2.06798 | -0.05697 | 1.98766  |
| H | -3.35648 | 0.72379  | 1.10151  |
| C | -2.39404 | -0.87298 | 0.01398  |
| H | -2.71029 | -0.50103 | -0.96832 |

|   |          |          |          |
|---|----------|----------|----------|
| H | -1.38204 | -1.27639 | -0.11772 |
| C | -3.32604 | -1.99096 | 0.49000  |
| H | -3.02545 | -2.29158 | 1.50385  |
| H | -4.35063 | -1.59961 | 0.57752  |
| C | -3.33287 | -3.23164 | -0.41425 |
| H | -2.31156 | -3.63283 | -0.48065 |
| H | -3.93893 | -4.01371 | 0.06215  |
| C | -3.87128 | -2.97204 | -1.82496 |
| H | -3.24274 | -2.26280 | -2.37443 |
| H | -3.91258 | -3.89852 | -2.40890 |
| H | -4.88562 | -2.55523 | -1.78581 |
| H | -2.88994 | 3.08493  | 0.19282  |

4e\_conformer-092

|   |          |          |          |
|---|----------|----------|----------|
| C | 3.95504  | -0.16972 | -0.06291 |
| C | 1.69733  | -0.43912 | -0.14307 |
| N | 2.91638  | -1.04511 | 0.12828  |
| H | 3.02874  | -2.02837 | 0.32953  |
| C | 3.39173  | 1.03670  | -0.44165 |
| C | 5.38080  | -0.57415 | 0.12400  |
| H | 5.67682  | -1.36984 | -0.57213 |
| H | 6.03637  | 0.28317  | -0.05073 |
| H | 5.57194  | -0.94336 | 1.13972  |
| C | 0.44181  | -1.16669 | 0.03673  |
| C | 0.34951  | -2.23552 | 0.95513  |
| C | -0.71049 | -0.80768 | -0.67610 |
| C | -0.85980 | -2.89334 | 1.14620  |
| H | 1.21309  | -2.52141 | 1.54735  |
| C | -1.93052 | -1.45470 | -0.45671 |
| H | -0.68607 | -0.01338 | -1.41122 |
| C | -2.01528 | -2.51229 | 0.45617  |
| H | -0.91821 | -3.70905 | 1.86155  |
| H | -2.94935 | -3.02908 | 0.63787  |
| O | -2.98262 | -0.97905 | -1.18851 |
| C | -4.25710 | -1.58193 | -0.98884 |
| H | -4.94448 | -1.05422 | -1.65113 |
| H | -4.24116 | -2.64641 | -1.25191 |
| H | -4.59160 | -1.46969 | 0.04932  |
| C | 1.97673  | 0.88404  | -0.50007 |
| C | 0.99718  | 1.98022  | -0.82757 |
| H | 1.55668  | 2.89249  | -1.06906 |
| H | 0.43813  | 1.73307  | -1.74104 |
| C | -0.00951 | 2.27919  | 0.30019  |
| H | -0.37052 | 1.33225  | 0.70896  |
| H | 0.50770  | 2.79230  | 1.12234  |

|   |          |         |          |
|---|----------|---------|----------|
| C | -1.20407 | 3.11242 | -0.17280 |
| H | -0.85802 | 4.10970 | -0.47859 |
| H | -1.62542 | 2.64462 | -1.07547 |
| C | -2.32296 | 3.25206 | 0.86976  |
| H | -1.91787 | 3.70533 | 1.78566  |
| H | -3.07494 | 3.95501 | 0.48737  |
| C | -3.01016 | 1.92416 | 1.21353  |
| H | -2.33010 | 1.23234 | 1.72178  |
| H | -3.87058 | 2.08492 | 1.87317  |
| H | -3.36625 | 1.41939 | 0.30700  |
| H | 3.94003  | 1.94653 | -0.65215 |

4e\_conformer-093

|   |          |          |          |
|---|----------|----------|----------|
| C | 0.77436  | 3.45683  | -0.26592 |
| C | 0.05041  | 1.38502  | 0.33540  |
| N | -0.31287 | 2.62575  | -0.17050 |
| H | -1.26795 | 2.91538  | -0.32544 |
| C | 1.86870  | 2.72638  | 0.16259  |
| C | 0.65781  | 4.86737  | -0.74350 |
| H | 1.64559  | 5.33549  | -0.76512 |
| H | 0.23584  | 4.92339  | -1.75508 |
| H | 0.01508  | 5.47098  | -0.08933 |
| C | -0.94664 | 0.32776  | 0.49762  |
| C | -0.80017 | -0.67859 | 1.47564  |
| C | -2.08724 | 0.29797  | -0.31870 |
| C | -1.76462 | -1.66971 | 1.60895  |
| H | 0.05591  | -0.66709 | 2.13897  |
| C | -3.06143 | -0.69604 | -0.16854 |
| H | -2.22788 | 1.02728  | -1.11027 |
| C | -2.90448 | -1.69539 | 0.79849  |
| H | -1.64029 | -2.43805 | 2.36710  |
| H | -3.64193 | -2.47792 | 0.92648  |
| O | -4.12139 | -0.61173 | -1.02594 |
| C | -5.13109 | -1.61168 | -0.93548 |
| H | -5.61283 | -1.60521 | 0.04967  |
| H | -5.86732 | -1.36355 | -1.70109 |
| H | -4.72257 | -2.61038 | -1.13154 |
| C | 1.43089  | 1.42600  | 0.54863  |
| C | 2.34435  | 0.31394  | 0.99134  |
| H | 3.35665  | 0.72366  | 1.10119  |
| H | 2.06818  | -0.05687 | 1.98759  |
| C | 2.39387  | -0.87311 | 0.01396  |
| H | 1.38182  | -1.27644 | -0.11752 |
| H | 2.70999  | -0.50130 | -0.96845 |
| C | 3.32585  | -1.99112 | 0.48993  |

|   |         |          |          |
|---|---------|----------|----------|
| H | 4.35051 | -1.59988 | 0.57715  |
| H | 3.02546 | -2.29155 | 1.50389  |
| C | 3.33231 | -3.23195 | -0.41412 |
| H | 3.93841 | -4.01400 | 0.06224  |
| H | 2.31094 | -3.63304 | -0.48018 |
| C | 3.87037 | -2.97264 | -1.82501 |
| H | 4.88476 | -2.55591 | -1.78621 |
| H | 3.91143 | -3.89922 | -2.40882 |
| H | 3.24175 | -2.26342 | -2.37443 |
| H | 2.89014 | 3.08491  | 0.19266  |

4e\_conformer-094

|   |          |          |          |
|---|----------|----------|----------|
| C | -0.54752 | 3.63068  | -0.18027 |
| C | 0.40437  | 1.57924  | 0.05510  |
| N | 0.63417  | 2.93191  | -0.15676 |
| H | 1.53723  | 3.32597  | -0.37848 |
| C | -1.55747 | 2.71391  | 0.04999  |
| C | -0.59457 | 5.10304  | -0.42810 |
| H | -1.62716 | 5.45739  | -0.36886 |
| H | -0.00331 | 5.66116  | 0.30906  |
| H | -0.20680 | 5.36502  | -1.42125 |
| C | 1.51612  | 0.63570  | 0.15530  |
| C | 2.77137  | 1.05483  | 0.64844  |
| C | 1.37026  | -0.70137 | -0.23884 |
| C | 3.82556  | 0.15401  | 0.73664  |
| H | 2.90546  | 2.07639  | 0.99033  |
| C | 2.43244  | -1.60696 | -0.12968 |
| H | 0.44072  | -1.05828 | -0.66469 |
| C | 3.67475  | -1.18372 | 0.35655  |
| H | 4.78540  | 0.48763  | 1.12128  |
| H | 4.51044  | -1.86718 | 0.44126  |
| O | 2.15829  | -2.88015 | -0.54180 |
| C | 3.20609  | -3.84176 | -0.47429 |
| H | 2.78102  | -4.77415 | -0.84815 |
| H | 4.05670  | -3.55051 | -1.10229 |
| H | 3.55056  | -3.98549 | 0.55691  |
| C | -0.97387 | 1.42075  | 0.20036  |
| C | -1.72889 | 0.15499  | 0.48975  |
| H | -1.07186 | -0.57166 | 0.98389  |
| H | -2.53463 | 0.37596  | 1.20023  |
| C | -2.33468 | -0.49238 | -0.77119 |
| H | -3.06370 | 0.20187  | -1.21181 |
| H | -1.54266 | -0.61383 | -1.52191 |
| C | -3.00019 | -1.85039 | -0.51633 |
| H | -3.30644 | -2.28202 | -1.47967 |

|   |          |          |          |
|---|----------|----------|----------|
| H | -2.25701 | -2.54312 | -0.09371 |
| C | -4.22130 | -1.79629 | 0.40904  |
| H | -3.92424 | -1.42420 | 1.39779  |
| H | -4.94163 | -1.06752 | 0.01066  |
| C | -4.90181 | -3.15846 | 0.56685  |
| H | -4.20862 | -3.89730 | 0.98770  |
| H | -5.77129 | -3.09926 | 1.23136  |
| H | -5.24506 | -3.54170 | -0.40201 |
| H | -2.61263 | 2.94794  | 0.11806  |

4e\_conformer-095

|   |          |          |          |
|---|----------|----------|----------|
| C | 0.54760  | 3.63064  | -0.18027 |
| C | -0.40435 | 1.57923  | 0.05511  |
| N | -0.63411 | 2.93190  | -0.15676 |
| H | -1.53716 | 3.32599  | -0.37846 |
| C | 1.55753  | 2.71385  | 0.04999  |
| C | 0.59468  | 5.10300  | -0.42810 |
| H | 0.20693  | 5.36499  | -1.42126 |
| H | 0.00343  | 5.66114  | 0.30905  |
| H | 1.62728  | 5.45733  | -0.36885 |
| C | -1.51612 | 0.63573  | 0.15530  |
| C | -2.77137 | 1.05489  | 0.64843  |
| C | -1.37030 | -0.70135 | -0.23883 |
| C | -3.82559 | 0.15410  | 0.73663  |
| H | -2.90543 | 2.07646  | 0.99031  |
| C | -2.43250 | -1.60692 | -0.12967 |
| H | -0.44077 | -1.05829 | -0.66466 |
| C | -3.67481 | -1.18364 | 0.35655  |
| H | -4.78542 | 0.48775  | 1.12125  |
| H | -4.51052 | -1.86707 | 0.44126  |
| O | -2.15840 | -2.88012 | -0.54178 |
| C | -3.20623 | -3.84169 | -0.47428 |
| H | -3.55071 | -3.98541 | 0.55691  |
| H | -4.05682 | -3.55041 | -1.10230 |
| H | -2.78118 | -4.77409 | -0.84814 |
| C | 0.97389  | 1.42070  | 0.20036  |
| C | 1.72888  | 0.15492  | 0.48975  |
| H | 2.53461  | 0.37588  | 1.20026  |
| H | 1.07183  | -0.57172 | 0.98386  |
| C | 2.33470  | -0.49242 | -0.77119 |
| H | 1.54270  | -0.61387 | -1.52193 |
| H | 3.06372  | 0.20184  | -1.21179 |
| C | 3.00021  | -1.85043 | -0.51633 |
| H | 2.25704  | -2.54317 | -0.09373 |
| H | 3.30647  | -2.28205 | -1.47968 |

|   |         |          |          |
|---|---------|----------|----------|
| C | 4.22132 | -1.79634 | 0.40904  |
| H | 4.94164 | -1.06755 | 0.01067  |
| H | 3.92425 | -1.42426 | 1.39779  |
| C | 4.90184 | -3.15850 | 0.56685  |
| H | 5.77132 | -3.09930 | 1.23136  |
| H | 4.20866 | -3.89735 | 0.98768  |
| H | 5.24510 | -3.54173 | -0.40203 |
| H | 2.61269 | 2.94786  | 0.11806  |

4e\_conformer-096

|   |          |          |          |
|---|----------|----------|----------|
| C | 2.64806  | 2.57415  | 0.28472  |
| C | 1.53146  | 0.59836  | 0.11346  |
| N | 2.76688  | 1.22854  | 0.04759  |
| H | 3.64707  | 0.74122  | -0.03981 |
| C | 1.30146  | 2.82292  | 0.48345  |
| C | 3.83182  | 3.48469  | 0.30981  |
| H | 3.50693  | 4.51204  | 0.49487  |
| H | 4.54385  | 3.21069  | 1.09926  |
| H | 4.37953  | 3.47027  | -0.64116 |
| C | 1.41672  | -0.83815 | -0.13146 |
| C | 2.37090  | -1.51662 | -0.91069 |
| C | 0.34669  | -1.57489 | 0.41556  |
| C | 2.25383  | -2.89015 | -1.12966 |
| H | 3.18489  | -0.96980 | -1.37604 |
| C | 0.22718  | -2.94350 | 0.17133  |
| H | -0.37347 | -1.06961 | 1.04172  |
| C | 1.18953  | -3.61197 | -0.60043 |
| H | 2.99668  | -3.40097 | -1.73597 |
| H | 1.08034  | -4.67754 | -0.77385 |
| O | -0.78943 | -3.71740 | 0.65421  |
| C | -1.82011 | -3.07581 | 1.39813  |
| H | -2.53938 | -3.85670 | 1.64836  |
| H | -1.43039 | -2.63008 | 2.32131  |
| H | -2.31539 | -2.29811 | 0.80360  |
| C | 0.58718  | 1.59380  | 0.38468  |
| C | -0.91112 | 1.47189  | 0.47538  |
| H | -1.20816 | 0.78366  | 1.27917  |
| H | -1.31182 | 2.44907  | 0.76745  |
| C | -1.57650 | 1.01882  | -0.83793 |
| H | -1.40083 | 1.78615  | -1.60444 |
| H | -1.07982 | 0.10845  | -1.19161 |
| C | -3.07992 | 0.74674  | -0.70856 |
| H | -3.45092 | 0.34279  | -1.66104 |
| H | -3.23993 | -0.04384 | 0.04076  |
| C | -3.92109 | 1.97142  | -0.33126 |

|   |          |         |          |
|---|----------|---------|----------|
| H | -3.60595 | 2.35292 | 0.64835  |
| H | -3.72415 | 2.77759 | -1.05236 |
| C | -5.42112 | 1.66820 | -0.29528 |
| H | -5.64534 | 0.88233 | 0.43663  |
| H | -6.00475 | 2.55497 | -0.02309 |
| H | -5.77587 | 1.31986 | -1.27313 |
| H | 0.86423  | 3.79465 | 0.67665  |

4e\_conformer-097

|   |          |          |          |
|---|----------|----------|----------|
| C | -1.69349 | -2.67070 | -0.39216 |
| C | -0.30209 | -1.13560 | 0.54395  |
| N | -0.39303 | -2.23729 | -0.29514 |
| H | 0.40620  | -2.73118 | -0.66658 |
| C | -2.45754 | -1.80918 | 0.37307  |
| C | -2.07072 | -3.87520 | -1.19117 |
| H | -3.15449 | -4.01665 | -1.16185 |
| H | -1.77162 | -3.77819 | -2.24268 |
| H | -1.60285 | -4.78965 | -0.80343 |
| C | 0.98281  | -0.46791 | 0.76362  |
| C | 1.34082  | 0.03730  | 2.02288  |
| C | 1.88754  | -0.33445 | -0.30908 |
| C | 2.56818  | 0.67994  | 2.19564  |
| H | 0.67431  | -0.09878 | 2.86684  |
| C | 3.12027  | 0.29522  | -0.12090 |
| H | 1.59770  | -0.69892 | -1.28691 |
| C | 3.46148  | 0.81244  | 1.13776  |
| H | 2.83804  | 1.06885  | 3.17355  |
| H | 4.42080  | 1.30460  | 1.26104  |
| O | 4.05098  | 0.46813  | -1.10466 |
| C | 3.75247  | -0.03547 | -2.40265 |
| H | 2.86515  | 0.45112  | -2.82538 |
| H | 4.62164  | 0.19476  | -3.02006 |
| H | 3.59467  | -1.12058 | -2.38327 |
| C | -1.59481 | -0.83991 | 0.97063  |
| C | -2.06276 | 0.35598  | 1.75392  |
| H | -2.84895 | 0.04410  | 2.45387  |
| H | -1.25001 | 0.76492  | 2.36199  |
| C | -2.61669 | 1.48166  | 0.85532  |
| H | -3.43800 | 1.07756  | 0.25028  |
| H | -3.05167 | 2.26424  | 1.49342  |
| C | -1.55077 | 2.10524  | -0.05124 |
| H | -0.72486 | 2.46757  | 0.57673  |
| H | -1.12174 | 1.32529  | -0.69396 |
| C | -2.06304 | 3.25799  | -0.92566 |
| H | -2.49228 | 4.04000  | -0.28307 |



|   |          |          |          |
|---|----------|----------|----------|
| H | -1.20812 | 3.71882  | -1.43841 |
| C | -3.09877 | 2.83111  | -1.97121 |
| H | -2.69713 | 2.04036  | -2.61743 |
| H | -4.01145 | 2.44456  | -1.50458 |
| H | -3.38605 | 3.67311  | -2.61128 |
| H | -3.53324 | -1.86064 | 0.48817  |

4e\_conformer-098

|   |          |          |          |
|---|----------|----------|----------|
| C | -0.83843 | 2.92964  | -0.08793 |
| C | 0.13373  | 0.88371  | 0.11312  |
| N | 0.29239  | 2.18991  | -0.32869 |
| H | 1.08777  | 2.51633  | -0.85850 |
| C | -1.73501 | 2.09009  | 0.54769  |
| C | -0.95439 | 4.36073  | -0.49978 |
| H | -0.16446 | 4.97963  | -0.05547 |
| H | -0.88772 | 4.48113  | -1.58899 |
| H | -1.91844 | 4.76353  | -0.17781 |
| C | 1.23116  | -0.07713 | 0.01177  |
| C | 0.99235  | -1.45978 | -0.13406 |
| C | 2.56213  | 0.36612  | 0.05127  |
| C | 2.05858  | -2.34728 | -0.22433 |
| H | -0.02288 | -1.82842 | -0.20693 |
| C | 3.62966  | -0.53222 | -0.05719 |
| H | 2.79647  | 1.41578  | 0.19833  |
| C | 3.38423  | -1.90405 | -0.19099 |
| H | 1.86141  | -3.40960 | -0.33930 |
| H | 4.19535  | -2.61716 | -0.26991 |
| O | 4.87458  | 0.02735  | -0.00623 |
| C | 5.99908  | -0.84232 | -0.08922 |
| H | 6.01433  | -1.38616 | -1.04140 |
| H | 6.87878  | -0.20075 | -0.02365 |
| H | 6.00928  | -1.56192 | 0.73829  |
| C | -1.14046 | 0.79862  | 0.67759  |
| C | -1.76936 | -0.39032 | 1.35005  |
| H | -0.98566 | -1.04289 | 1.75206  |
| H | -2.35455 | -0.04336 | 2.21271  |
| C | -2.69903 | -1.22980 | 0.44733  |
| H | -2.13871 | -1.58134 | -0.43045 |
| H | -2.99756 | -2.12594 | 1.00585  |
| C | -3.94342 | -0.47602 | -0.03183 |
| H | -4.52219 | -0.14262 | 0.84292  |
| H | -3.62626 | 0.43389  | -0.55541 |
| C | -4.85329 | -1.29388 | -0.95961 |
| H | -5.64609 | -0.63784 | -1.34310 |
| H | -4.27438 | -1.61824 | -1.83617 |

|   |          |          |          |
|---|----------|----------|----------|
| C | -5.49626 | -2.51443 | -0.29294 |
| H | -6.06898 | -2.21807 | 0.59495  |
| H | -6.18265 | -3.02370 | -0.97901 |
| H | -4.74587 | -3.24600 | 0.02616  |
| H | -2.71794 | 2.37540  | 0.89995  |

4e\_conformer-099

|   |          |          |          |
|---|----------|----------|----------|
| C | 1.69476  | -2.67031 | -0.39252 |
| C | 0.30296  | -1.13573 | 0.54385  |
| N | 0.39416  | -2.23736 | -0.29528 |
| H | -0.40496 | -2.73150 | -0.66663 |
| C | 2.45862  | -1.80854 | 0.37261  |
| C | 2.07228  | -3.87465 | -1.19163 |
| H | 1.60471  | -4.78927 | -0.80390 |
| H | 1.77307  | -3.77767 | -2.24310 |
| H | 3.15610  | -4.01578 | -1.16239 |
| C | -0.98214 | -0.46846 | 0.76369  |
| C | -1.34018 | 0.03655  | 2.02302  |
| C | -1.88701 | -0.33521 | -0.30891 |
| C | -2.56771 | 0.67880  | 2.19594  |
| H | -0.67354 | -0.09938 | 2.86691  |
| C | -3.11991 | 0.29407  | -0.12057 |
| H | -1.59714 | -0.69953 | -1.28679 |
| C | -3.46116 | 0.81110  | 1.13816  |
| H | -2.83760 | 1.06757  | 3.17390  |
| H | -4.42061 | 1.30296  | 1.26155  |
| O | -4.05077 | 0.46678  | -1.10423 |
| C | -3.75221 | -0.03662 | -2.40229 |
| H | -3.59407 | -1.12168 | -2.38303 |
| H | -4.62149 | 0.19340  | -3.01962 |
| H | -2.86506 | 0.45028  | -2.82505 |
| C | 1.59564  | -0.83959 | 0.97033  |
| C | 2.06331  | 0.35646  | 1.75357  |
| H | 1.25070  | 0.76472  | 2.36229  |
| H | 2.85016  | 0.04493  | 2.45291  |
| C | 2.61590  | 1.48272  | 0.85487  |
| H | 3.05079  | 2.26542  | 1.49287  |
| H | 3.43708  | 1.07930  | 0.24919  |
| C | 1.54897  | 2.10584  | -0.05084 |
| H | 1.12008  | 1.32578  | -0.69352 |
| H | 0.72321  | 2.46741  | 0.57775  |
| C | 2.05992  | 3.25919  | -0.92524 |
| H | 1.20436  | 3.71959  | -1.43732 |
| H | 2.48902  | 4.04131  | -0.28268 |
| C | 3.09529  | 2.83331  | -1.97156 |

|   |         |          |          |
|---|---------|----------|----------|
| H | 2.69377 | 2.04249  | -2.61776 |
| H | 3.38161 | 3.67570  | -2.61155 |
| H | 4.00851 | 2.44724  | -1.50561 |
| H | 3.53435 | -1.85962 | 0.48755  |

4e\_conformer-100

|   |          |          |          |
|---|----------|----------|----------|
| C | 0.29926  | 3.44513  | -0.03125 |
| C | -0.20582 | 1.25177  | 0.30409  |
| N | -0.71041 | 2.52028  | 0.05186  |
| H | -1.69424 | 2.74865  | 0.05533  |
| C | 1.48433  | 2.75295  | 0.14485  |
| C | 0.03099  | 4.89722  | -0.25616 |
| H | -0.51751 | 5.07224  | -1.19053 |
| H | -0.56284 | 5.33592  | 0.55638  |
| H | 0.97522  | 5.44541  | -0.31318 |
| C | -1.10383 | 0.10261  | 0.40936  |
| C | -0.76551 | -1.02784 | 1.18301  |
| C | -2.33978 | 0.10541  | -0.25458 |
| C | -1.64066 | -2.10339 | 1.26967  |
| H | 0.16949  | -1.04929 | 1.72899  |
| C | -3.22232 | -0.97615 | -0.15027 |
| H | -2.63071 | 0.93440  | -0.89202 |
| C | -2.87579 | -2.09672 | 0.61312  |
| H | -1.36843 | -2.96690 | 1.87037  |
| H | -3.54021 | -2.94718 | 0.70127  |
| O | -4.39176 | -0.84689 | -0.84417 |
| C | -5.31928 | -1.92602 | -0.79144 |
| H | -4.88412 | -2.84684 | -1.19818 |
| H | -5.66039 | -2.10989 | 0.23446  |
| H | -6.16703 | -1.62214 | -1.40688 |
| C | 1.18507  | 1.37629  | 0.36153  |
| C | 2.22029  | 0.29350  | 0.51343  |
| H | 3.20259  | 0.77386  | 0.58553  |
| H | 2.09100  | -0.25468 | 1.45664  |
| C | 2.22833  | -0.71642 | -0.64937 |
| H | 1.21760  | -1.12291 | -0.76988 |
| H | 2.46047  | -0.18021 | -1.57998 |
| C | 3.21361  | -1.87604 | -0.45871 |
| H | 2.95983  | -2.41725 | 0.46521  |
| H | 3.07811  | -2.59446 | -1.27957 |
| C | 4.68808  | -1.45928 | -0.40899 |
| H | 4.92659  | -0.87583 | -1.30979 |
| H | 4.85837  | -0.78949 | 0.44359  |
| C | 5.63649  | -2.65654 | -0.30603 |
| H | 5.43416  | -3.24115 | 0.59998  |

|   |         |          |          |
|---|---------|----------|----------|
| H | 5.51783 | -3.32773 | -1.16561 |
| H | 6.68461 | -2.33815 | -0.27130 |
| H | 2.47575 | 3.18777  | 0.11616  |

4e\_conformer-101

|   |          |          |          |
|---|----------|----------|----------|
| C | -0.29927 | 3.44513  | -0.03125 |
| C | 0.20582  | 1.25177  | 0.30409  |
| N | 0.71040  | 2.52028  | 0.05186  |
| H | 1.69423  | 2.74866  | 0.05533  |
| C | -1.48434 | 2.75294  | 0.14485  |
| C | -0.03101 | 4.89722  | -0.25617 |
| H | 0.56283  | 5.33592  | 0.55637  |
| H | 0.51749  | 5.07223  | -1.19054 |
| H | -0.97523 | 5.44540  | -0.31319 |
| C | 1.10383  | 0.10261  | 0.40937  |
| C | 0.76552  | -1.02783 | 1.18303  |
| C | 2.33978  | 0.10542  | -0.25459 |
| C | 1.64067  | -2.10338 | 1.26968  |
| H | -0.16947 | -1.04928 | 1.72901  |
| C | 3.22233  | -0.97614 | -0.15028 |
| H | 2.63071  | 0.93440  | -0.89203 |
| C | 2.87580  | -2.09672 | 0.61312  |
| H | 1.36846  | -2.96689 | 1.87039  |
| H | 3.54022  | -2.94717 | 0.70127  |
| O | 4.39176  | -0.84688 | -0.84418 |
| C | 5.31928  | -1.92601 | -0.79146 |
| H | 4.88412  | -2.84683 | -1.19818 |
| H | 6.16703  | -1.62214 | -1.40690 |
| H | 5.66040  | -2.10988 | 0.23445  |
| C | -1.18508 | 1.37628  | 0.36154  |
| C | -2.22028 | 0.29349  | 0.51343  |
| H | -2.09099 | -0.25470 | 1.45664  |
| H | -3.20258 | 0.77385  | 0.58555  |
| C | -2.22833 | -0.71642 | -0.64938 |
| H | -2.46048 | -0.18020 | -1.57998 |
| H | -1.21760 | -1.12291 | -0.76989 |
| C | -3.21361 | -1.87604 | -0.45872 |
| H | -3.07812 | -2.59446 | -1.27959 |
| H | -2.95983 | -2.41726 | 0.46520  |
| C | -4.68808 | -1.45928 | -0.40899 |
| H | -4.85837 | -0.78950 | 0.44360  |
| H | -4.92660 | -0.87583 | -1.30978 |
| C | -5.63649 | -2.65654 | -0.30604 |
| H | -5.51783 | -3.32773 | -1.16562 |
| H | -5.43416 | -3.24116 | 0.59997  |

|   |          |          |          |
|---|----------|----------|----------|
| H | -6.68461 | -2.33816 | -0.27130 |
| H | -2.47576 | 3.18775  | 0.11617  |

4e\_conformer-102

|   |          |          |          |
|---|----------|----------|----------|
| C | 2.76836  | -1.70772 | -0.05050 |
| C | 0.60503  | -1.08010 | 0.26191  |
| N | 1.45639  | -2.01615 | -0.31140 |
| H | 1.15216  | -2.74323 | -0.94288 |
| C | 2.76146  | -0.56902 | 0.73393  |
| C | 3.89787  | -2.52539 | -0.58604 |
| H | 3.83523  | -3.57199 | -0.26184 |
| H | 3.91883  | -2.52565 | -1.68368 |
| H | 4.85033  | -2.12027 | -0.23393 |
| C | -0.84488 | -1.21766 | 0.12087  |
| C | -1.43755 | -2.49085 | 0.05694  |
| C | -1.67009 | -0.08006 | 0.02061  |
| C | -2.81861 | -2.61625 | -0.10230 |
| H | -0.82324 | -3.37988 | 0.16072  |
| C | -3.05243 | -0.21741 | -0.12198 |
| H | -1.21547 | 0.89886  | 0.02185  |
| C | -3.63366 | -1.49236 | -0.18751 |
| H | -3.26628 | -3.60512 | -0.14790 |
| H | -4.70908 | -1.57608 | -0.30580 |
| O | -3.91573 | 0.83557  | -0.22535 |
| C | -3.37389 | 2.15046  | -0.15803 |
| H | -2.67295 | 2.33732  | -0.98080 |
| H | -4.22310 | 2.82951  | -0.24392 |
| H | -2.86333 | 2.32268  | 0.79739  |
| C | 1.40797  | -0.15983 | 0.93415  |
| C | 0.98662  | 0.99871  | 1.79697  |
| H | -0.10214 | 1.00899  | 1.91707  |
| H | 1.39803  | 0.84386  | 2.80465  |
| C | 1.46229  | 2.38720  | 1.31858  |
| H | 1.31216  | 3.09083  | 2.14806  |
| H | 2.54508  | 2.35442  | 1.14374  |
| C | 0.74979  | 2.96260  | 0.08387  |
| H | -0.33326 | 2.96782  | 0.27490  |
| H | 1.03808  | 4.01951  | -0.01021 |
| C | 1.02097  | 2.27566  | -1.26504 |
| H | 0.66791  | 1.23998  | -1.24011 |
| H | 0.42348  | 2.78931  | -2.03087 |
| C | 2.49390  | 2.29048  | -1.68294 |
| H | 3.10284  | 1.67814  | -1.01041 |
| H | 2.61751  | 1.88991  | -2.69584 |
| H | 2.89847  | 3.31079  | -1.67477 |

|   |         |          |         |
|---|---------|----------|---------|
| H | 3.64086 | -0.08199 | 1.13621 |
|---|---------|----------|---------|

4e\_conformer-103

|   |          |          |          |
|---|----------|----------|----------|
| C | -2.76842 | -1.70765 | -0.05046 |
| C | -0.60508 | -1.08008 | 0.26192  |
| N | -1.45646 | -2.01612 | -0.31137 |
| H | -1.15225 | -2.74321 | -0.94285 |
| C | -2.76148 | -0.56895 | 0.73396  |
| C | -3.89796 | -2.52530 | -0.58597 |
| H | -4.85041 | -2.12015 | -0.23386 |
| H | -3.91893 | -2.52558 | -1.68362 |
| H | -3.83534 | -3.57190 | -0.26176 |
| C | 0.84484  | -1.21768 | 0.12086  |
| C | 1.43746  | -2.49088 | 0.05689  |
| C | 1.67007  | -0.08010 | 0.02064  |
| C | 2.81852  | -2.61631 | -0.10237 |
| H | 0.82314  | -3.37990 | 0.16064  |
| C | 3.05241  | -0.21748 | -0.12197 |
| H | 1.21548  | 0.89884  | 0.02191  |
| C | 3.63360  | -1.49244 | -0.18755 |
| H | 3.26617  | -3.60520 | -0.14800 |
| H | 4.70902  | -1.57618 | -0.30585 |
| O | 3.91573  | 0.83548  | -0.22531 |
| C | 3.37393  | 2.15038  | -0.15791 |
| H | 2.86340  | 2.32257  | 0.79753  |
| H | 4.22315  | 2.82942  | -0.24380 |
| H | 2.67297  | 2.33730  | -0.98065 |
| C | -1.40798 | -0.15979 | 0.93416  |
| C | -0.98660 | 0.99876  | 1.79696  |
| H | -1.39801 | 0.84395  | 2.80464  |
| H | 0.10217  | 1.00900  | 1.91705  |
| C | -1.46222 | 2.38725  | 1.31852  |
| H | -2.54500 | 2.35450  | 1.14368  |
| H | -1.31208 | 3.09090  | 2.14800  |
| C | -0.74968 | 2.96261  | 0.08382  |
| H | 0.33336  | 2.96782  | 0.27487  |
| H | -1.03795 | 4.01953  | -0.01029 |
| C | -1.02085 | 2.27565  | -1.26508 |
| H | -0.42333 | 2.78927  | -2.03091 |
| H | -0.66781 | 1.23996  | -1.24012 |
| C | -2.49377 | 2.29050  | -1.68302 |
| H | -2.61736 | 1.88991  | -2.69591 |
| H | -3.10274 | 1.67818  | -1.01049 |
| H | -2.89832 | 3.31081  | -1.67488 |
| H | -3.64087 | -0.08189 | 1.13625  |

## 4e\_conformer-104

|   |          |          |          |
|---|----------|----------|----------|
| C | 2.08041  | 2.63789  | -0.19510 |
| C | 0.23228  | 1.35045  | 0.11899  |
| N | 0.73862  | 2.50900  | -0.45430 |
| H | 0.21542  | 3.11133  | -1.07337 |
| C | 2.44085  | 1.55435  | 0.58521  |
| C | 2.88653  | 3.77721  | -0.72730 |
| H | 2.48850  | 4.74710  | -0.40270 |
| H | 3.91775  | 3.70104  | -0.37219 |
| H | 2.90983  | 3.78627  | -1.82488 |
| C | -1.19101 | 1.03095  | 0.02152  |
| C | -2.15052 | 2.06207  | -0.08750 |
| C | -1.64217 | -0.29582 | 0.02912  |
| C | -3.50202 | 1.75484  | -0.18401 |
| H | -1.83576 | 3.10064  | -0.06273 |
| C | -3.00742 | -0.59614 | -0.05081 |
| H | -0.94325 | -1.12160 | 0.06834  |
| C | -3.95174 | 0.43048  | -0.16321 |
| H | -4.22996 | 2.55754  | -0.26348 |
| H | -5.01125 | 0.21814  | -0.23355 |
| O | -3.31404 | -1.92710 | -0.02800 |
| C | -4.68558 | -2.29586 | -0.12813 |
| H | -5.26935 | -1.89406 | 0.70880  |
| H | -4.70561 | -3.38592 | -0.09435 |
| H | -5.12380 | -1.95159 | -1.07271 |
| C | 1.29085  | 0.73357  | 0.78836  |
| C | 1.24809  | -0.52291 | 1.61325  |
| H | 1.91374  | -0.40395 | 2.47909  |
| H | 0.23852  | -0.66497 | 2.01636  |
| C | 1.66591  | -1.80152 | 0.85643  |
| H | 1.49175  | -2.66796 | 1.51031  |
| H | 1.01251  | -1.93255 | -0.01503 |
| C | 3.12955  | -1.80144 | 0.40454  |
| H | 3.29902  | -0.95785 | -0.27730 |
| H | 3.76838  | -1.62108 | 1.28105  |
| C | 3.57300  | -3.10236 | -0.27957 |
| H | 3.41125  | -3.94660 | 0.40575  |
| H | 4.65562  | -3.05576 | -0.45764 |
| C | 2.86145  | -3.37998 | -1.60809 |
| H | 2.99401  | -2.54226 | -2.30434 |
| H | 3.25892  | -4.28108 | -2.08882 |
| H | 1.78483  | -3.52759 | -1.46952 |
| H | 3.43016  | 1.37191  | 0.98472  |

## 4e\_conformer-105

|   |          |          |          |
|---|----------|----------|----------|
| C | 1.41768  | 2.52363  | -0.48707 |
| C | 0.08637  | 0.69817  | -0.75865 |
| N | 0.14385  | 2.02852  | -0.36487 |
| H | -0.66845 | 2.58885  | -0.14922 |
| C | 2.20436  | 1.48019  | -0.94214 |
| C | 1.75312  | 3.94396  | -0.16878 |
| H | 2.82517  | 4.11169  | -0.30263 |
| H | 1.21972  | 4.64865  | -0.82016 |
| H | 1.49809  | 4.20201  | 0.86703  |
| C | -1.17152 | -0.04367 | -0.68660 |
| C | -1.45437 | -1.09339 | -1.57563 |
| C | -2.13502 | 0.30222  | 0.28421  |
| C | -2.66556 | -1.78068 | -1.48681 |
| H | -0.73966 | -1.35514 | -2.34668 |
| C | -3.35016 | -0.38262 | 0.35378  |
| H | -1.90714 | 1.08256  | 0.99960  |
| C | -3.61850 | -1.43471 | -0.53436 |
| H | -2.87414 | -2.59057 | -2.18037 |
| H | -4.56562 | -1.95890 | -0.45870 |
| O | -4.33194 | -0.11024 | 1.26289  |
| C | -4.11230 | 0.94993  | 2.18751  |
| H | -5.01384 | 1.00517  | 2.79896  |
| H | -3.24742 | 0.74661  | 2.83059  |
| H | -3.96164 | 1.90556  | 1.67088  |
| C | 1.38311  | 0.32842  | -1.12227 |
| C | 1.89863  | -1.03228 | -1.51288 |
| H | 1.41989  | -1.39122 | -2.43290 |
| H | 2.96231  | -0.93146 | -1.75737 |
| C | 1.72677  | -2.10965 | -0.42103 |
| H | 0.65862  | -2.32509 | -0.30102 |
| H | 2.19543  | -3.03879 | -0.77461 |
| C | 2.31149  | -1.72871 | 0.94455  |
| H | 1.79163  | -0.83789 | 1.32172  |
| H | 2.09606  | -2.53697 | 1.65776  |
| C | 3.81996  | -1.46116 | 0.93775  |
| H | 4.34201  | -2.33155 | 0.51477  |
| H | 4.04017  | -0.61634 | 0.27355  |
| C | 4.36974  | -1.15795 | 2.33378  |
| H | 4.19333  | -1.99664 | 3.01866  |
| H | 5.44856  | -0.96583 | 2.30987  |
| H | 3.88186  | -0.27346 | 2.76199  |
| H | 3.27081  | 1.53081  | -1.12301 |

## 4e\_conformer-106



|   |          |          |          |
|---|----------|----------|----------|
| C | -3.23238 | -1.30439 | -0.29469 |
| C | -1.04515 | -0.94178 | 0.21191  |
| N | -1.94558 | -1.74821 | -0.47249 |
| H | -1.67380 | -2.47717 | -1.11633 |
| C | -3.16313 | -0.20909 | 0.54614  |
| C | -4.39862 | -1.96753 | -0.95169 |
| H | -4.47462 | -3.02736 | -0.67702 |
| H | -5.32625 | -1.47422 | -0.64926 |
| H | -4.33473 | -1.91928 | -2.04663 |
| C | 0.38834  | -1.22974 | 0.15809  |
| C | 0.84833  | -2.56013 | 0.04560  |
| C | 1.33728  | -0.20001 | 0.18318  |
| C | 2.21013  | -2.82509 | -0.03774 |
| H | 0.13778  | -3.38102 | 0.05146  |
| C | 2.70747  | -0.47548 | 0.10993  |
| H | 1.03124  | 0.83563  | 0.22796  |
| C | 3.15707  | -1.79574 | -0.00395 |
| H | 2.55233  | -3.85302 | -0.12011 |
| H | 4.21249  | -2.02974 | -0.06808 |
| O | 3.52278  | 0.62048  | 0.13667  |
| C | 4.92681  | 0.40759  | 0.03293  |
| H | 5.30218  | -0.19504 | 0.86874  |
| H | 5.38288  | 1.39787  | 0.06581  |
| H | 5.18714  | -0.08354 | -0.91246 |
| C | -1.79375 | 0.03279  | 0.87078  |
| C | -1.32142 | 1.09738  | 1.82343  |
| H | -1.87419 | 0.97915  | 2.76595  |
| H | -0.26557 | 0.94362  | 2.07297  |
| C | -1.52698 | 2.55580  | 1.35319  |
| H | -2.55989 | 2.67676  | 0.99851  |
| H | -1.42798 | 3.20263  | 2.23479  |
| C | -0.55160 | 3.06015  | 0.27938  |
| H | -0.62308 | 4.15602  | 0.22783  |
| H | 0.47794  | 2.85037  | 0.60691  |
| C | -0.76468 | 2.50085  | -1.13315 |
| H | -1.76126 | 2.80043  | -1.48652 |
| H | -0.76980 | 1.40709  | -1.10882 |
| C | 0.30541  | 2.98433  | -2.11496 |
| H | 1.30100  | 2.64269  | -1.80410 |
| H | 0.12398  | 2.60475  | -3.12700 |
| H | 0.33302  | 4.08004  | -2.16702 |
| H | -4.01276 | 0.35751  | 0.90619  |

4e\_conformer-107

|   |          |          |          |
|---|----------|----------|----------|
| C | -0.74126 | 3.09479  | 0.09020  |
| C | 0.13601  | 0.99695  | 0.07670  |
| N | 0.40351  | 2.35029  | 0.23299  |
| H | 1.29479  | 2.72156  | 0.52906  |
| C | -1.76210 | 2.20571  | -0.19340 |
| C | -0.74679 | 4.58025  | 0.24731  |
| H | -1.75125 | 4.97024  | 0.06215  |
| H | -0.44899 | 4.88715  | 1.25847  |
| H | -0.06017 | 5.06870  | -0.45587 |
| C | 1.20696  | 0.00510  | 0.15540  |
| C | 0.96295  | -1.30666 | 0.61421  |
| C | 2.51556  | 0.34617  | -0.21832 |
| C | 2.00122  | -2.22892 | 0.67616  |
| H | -0.02809 | -1.58704 | 0.94910  |
| C | 3.55853  | -0.58355 | -0.13659 |
| H | 2.74468  | 1.33276  | -0.60891 |
| C | 3.30610  | -1.88694 | 0.30775  |
| H | 1.80183  | -3.23545 | 1.03358  |
| H | 4.09689  | -2.62393 | 0.37187  |
| O | 4.78440  | -0.12580 | -0.52793 |
| C | 5.87967  | -1.03466 | -0.48309 |
| H | 5.71035  | -1.89681 | -1.13938 |
| H | 6.74726  | -0.47506 | -0.83509 |
| H | 6.06359  | -1.38864 | 0.53846  |
| C | -1.22527 | 0.88371  | -0.20525 |
| C | -2.00806 | -0.36378 | -0.50049 |
| H | -2.71118 | -0.15542 | -1.31647 |
| H | -1.34059 | -1.15491 | -0.86358 |
| C | -2.79552 | -0.88469 | 0.71669  |
| H | -2.10259 | -1.02196 | 1.55727  |
| H | -3.50215 | -0.10923 | 1.03862  |
| C | -3.53472 | -2.20531 | 0.46076  |
| H | -4.03553 | -2.51259 | 1.38969  |
| H | -2.79535 | -2.98719 | 0.23611  |
| C | -4.57369 | -2.16608 | -0.67112 |
| H | -4.07248 | -1.97825 | -1.62954 |
| H | -5.02763 | -3.16193 | -0.75904 |
| C | -5.67827 | -1.12575 | -0.46261 |
| H | -5.27939 | -0.10511 | -0.47123 |
| H | -6.43576 | -1.19047 | -1.25183 |
| H | -6.18293 | -1.27562 | 0.50012  |
| H | -2.79292 | 2.47554  | -0.38695 |

4e\_conformer-108

|   |         |         |         |
|---|---------|---------|---------|
| C | 0.74128 | 3.09479 | 0.09020 |
|---|---------|---------|---------|

|   |          |          |          |
|---|----------|----------|----------|
| C | -0.13601 | 0.99694  | 0.07671  |
| N | -0.40350 | 2.35029  | 0.23299  |
| H | -1.29479 | 2.72156  | 0.52906  |
| C | 1.76211  | 2.20570  | -0.19339 |
| C | 0.74681  | 4.58025  | 0.24731  |
| H | 0.06017  | 5.06869  | -0.45586 |
| H | 0.44904  | 4.88715  | 1.25847  |
| H | 1.75127  | 4.97023  | 0.06212  |
| C | -1.20696 | 0.00511  | 0.15541  |
| C | -0.96296 | -1.30665 | 0.61425  |
| C | -2.51555 | 0.34617  | -0.21833 |
| C | -2.00123 | -2.22890 | 0.67620  |
| H | 0.02807  | -1.58703 | 0.94915  |
| C | -3.55853 | -0.58354 | -0.13660 |
| H | -2.74466 | 1.33276  | -0.60894 |
| C | -3.30611 | -1.88692 | 0.30777  |
| H | -1.80185 | -3.23543 | 1.03364  |
| H | -4.09691 | -2.62391 | 0.37189  |
| O | -4.78439 | -0.12580 | -0.52797 |
| C | -5.87966 | -1.03465 | -0.48313 |
| H | -5.71034 | -1.89682 | -1.13940 |
| H | -6.06360 | -1.38861 | 0.53842  |
| H | -6.74724 | -0.47506 | -0.83515 |
| C | 1.22527  | 0.88370  | -0.20524 |
| C | 2.00805  | -0.36379 | -0.50047 |
| H | 1.34058  | -1.15493 | -0.86354 |
| H | 2.71117  | -0.15544 | -1.31647 |
| C | 2.79554  | -0.88469 | 0.71671  |
| H | 3.50217  | -0.10922 | 1.03862  |
| H | 2.10262  | -1.02194 | 1.55730  |
| C | 3.53473  | -2.20531 | 0.46078  |
| H | 4.03557  | -2.51257 | 1.38971  |
| H | 2.79536  | -2.98720 | 0.23618  |
| C | 4.57366  | -2.16610 | -0.67113 |
| H | 5.02762  | -3.16195 | -0.75903 |
| H | 4.07242  | -1.97831 | -1.62954 |
| C | 5.67824  | -1.12575 | -0.46269 |
| H | 6.43570  | -1.19049 | -1.25192 |
| H | 5.27935  | -0.10512 | -0.47133 |
| H | 6.18293  | -1.27558 | 0.50003  |
| H | 2.79293  | 2.47552  | -0.38694 |

4e\_conformer-109

|   |         |          |          |
|---|---------|----------|----------|
| C | 2.73768 | -1.83858 | -0.32631 |
| C | 0.95647 | -0.76689 | 0.59374  |

|   |          |          |          |
|---|----------|----------|----------|
| N | 1.37372  | -1.85460 | -0.15934 |
| H | 0.77046  | -2.61917 | -0.42800 |
| C | 3.20115  | -0.69782 | 0.30293  |
| C | 3.46126  | -2.92848 | -1.04744 |
| H | 3.36591  | -3.89522 | -0.53567 |
| H | 3.08287  | -3.06288 | -2.06874 |
| H | 4.52606  | -2.68885 | -1.11210 |
| C | -0.46854 | -0.52165 | 0.82255  |
| C | -0.94342 | -0.01459 | 2.04882  |
| C | -1.39396 | -0.79148 | -0.19443 |
| C | -2.30068 | 0.23084  | 2.22157  |
| H | -0.24987 | 0.15866  | 2.86379  |
| C | -2.76115 | -0.55236 | -0.00908 |
| H | -1.06255 | -1.15669 | -1.16110 |
| C | -3.22476 | -0.03120 | 1.20437  |
| H | -2.65895 | 0.62139  | 3.17004  |
| H | -4.27690 | 0.16713  | 1.36685  |
| O | -3.55791 | -0.84476 | -1.07902 |
| C | -4.95411 | -0.59283 | -0.95718 |
| H | -5.39925 | -1.19052 | -0.15265 |
| H | -5.15296 | 0.46946  | -0.77098 |
| H | -5.39494 | -0.88327 | -1.91166 |
| C | 2.09122  | -0.01368 | 0.88513  |
| C | 2.15651  | 1.35180  | 1.51009  |
| H | 1.29406  | 1.51704  | 2.16300  |
| H | 3.04550  | 1.41081  | 2.15218  |
| C | 2.21365  | 2.51373  | 0.49297  |
| H | 2.34160  | 3.44265  | 1.06429  |
| H | 3.11219  | 2.40936  | -0.13074 |
| C | 0.96967  | 2.63755  | -0.40831 |
| H | 0.07975  | 2.33664  | 0.16186  |
| H | 0.81834  | 3.69425  | -0.67021 |
| C | 1.03014  | 1.83057  | -1.71210 |
| H | 1.87719  | 2.19205  | -2.31286 |
| H | 1.23596  | 0.77941  | -1.48939 |
| C | -0.26229 | 1.93794  | -2.52506 |
| H | -0.49151 | 2.98256  | -2.77195 |
| H | -0.19315 | 1.37958  | -3.46610 |
| H | -1.11025 | 1.53418  | -1.95913 |
| H | 4.23464  | -0.37541 | 0.33332  |

4e\_conformer-110

|   |          |         |         |
|---|----------|---------|---------|
| C | 1.08616  | 2.68540 | 0.06187 |
| C | -0.07170 | 0.72893 | 0.01373 |
| N | -0.13934 | 2.09568 | 0.24589 |

|   |          |          |          |
|---|----------|----------|----------|
| H | -0.95267 | 2.56799  | 0.61347  |
| C | 1.95648  | 1.68233  | -0.32444 |
| C | 1.30584  | 4.14609  | 0.28401  |
| H | 0.65315  | 4.75910  | -0.35059 |
| H | 1.11304  | 4.43653  | 1.32508  |
| H | 2.34195  | 4.40614  | 0.05124  |
| C | -1.27229 | -0.10145 | 0.09843  |
| C | -1.20694 | -1.46184 | 0.46610  |
| C | -2.53200 | 0.45091  | -0.18024 |
| C | -2.36772 | -2.22371 | 0.53482  |
| H | -0.25479 | -1.90678 | 0.72582  |
| C | -3.69755 | -0.31852 | -0.09151 |
| H | -2.63003 | 1.48318  | -0.50141 |
| C | -3.62283 | -1.67085 | 0.26284  |
| H | -2.30423 | -3.26974 | 0.82183  |
| H | -4.51128 | -2.28619 | 0.33072  |
| O | -4.85818 | 0.33901  | -0.38504 |
| C | -6.07436 | -0.39942 | -0.32745 |
| H | -6.25898 | -0.78701 | 0.68170  |
| H | -6.86397 | 0.30340  | -0.59639 |
| H | -6.06956 | -1.23329 | -1.03972 |
| C | 1.24441  | 0.44490  | -0.35617 |
| C | 1.81523  | -0.88515 | -0.76438 |
| H | 1.01536  | -1.52550 | -1.15343 |
| H | 2.51503  | -0.73465 | -1.59608 |
| C | 2.54224  | -1.64473 | 0.36697  |
| H | 1.83619  | -1.82217 | 1.18866  |
| H | 2.82952  | -2.63489 | -0.00961 |
| C | 3.77398  | -0.92939 | 0.94067  |
| H | 3.45793  | 0.02494  | 1.37988  |
| H | 4.17198  | -1.53492 | 1.76713  |
| C | 4.90693  | -0.66455 | -0.06284 |
| H | 4.55727  | 0.01440  | -0.85123 |
| H | 5.71164  | -0.12965 | 0.45871  |
| C | 5.47970  | -1.93145 | -0.70569 |
| H | 4.73465  | -2.44411 | -1.32432 |
| H | 6.33583  | -1.69615 | -1.34806 |
| H | 5.81920  | -2.64095 | 0.05945  |
| H | 2.99998  | 1.82368  | -0.57408 |

4e\_conformer-111

|   |         |          |          |
|---|---------|----------|----------|
| C | 3.67531 | -0.91231 | -0.13543 |
| C | 1.40019 | -0.85930 | -0.13015 |
| N | 2.53265 | -1.58133 | 0.22237  |
| H | 2.51305 | -2.52553 | 0.58011  |

|   |          |          |          |
|---|----------|----------|----------|
| C | 3.27148  | 0.28111  | -0.70795 |
| C | 5.03640  | -1.48345 | 0.09378  |
| H | 5.79841  | -0.77405 | -0.23998 |
| H | 5.21689  | -1.69787 | 1.15490  |
| H | 5.18669  | -2.42094 | -0.45742 |
| C | 0.06728  | -1.37353 | 0.18041  |
| C | -0.12702 | -2.26513 | 1.25842  |
| C | -1.04940 | -1.00550 | -0.58258 |
| C | -1.39548 | -2.75637 | 1.54287  |
| H | 0.70925  | -2.54445 | 1.89159  |
| C | -2.32597 | -1.49176 | -0.27972 |
| H | -0.94830 | -0.34644 | -1.43592 |
| C | -2.51002 | -2.37916 | 0.78731  |
| H | -1.53090 | -3.43784 | 2.37820  |
| H | -3.48911 | -2.76971 | 1.03514  |
| O | -3.32795 | -1.04905 | -1.09609 |
| C | -4.64741 | -1.52214 | -0.84692 |
| H | -5.28036 | -1.05543 | -1.60282 |
| H | -4.70592 | -2.61293 | -0.94457 |
| H | -4.99501 | -1.22950 | 0.15122  |
| C | 1.84719  | 0.32772  | -0.71728 |
| C | 1.03415  | 1.50277  | -1.19166 |
| H | 1.71566  | 2.22951  | -1.65210 |
| H | 0.33755  | 1.20905  | -1.98853 |
| C | 0.24499  | 2.20394  | -0.07254 |
| H | -0.41202 | 1.47568  | 0.41946  |
| H | 0.95459  | 2.54690  | 0.69041  |
| C | -0.59629 | 3.37467  | -0.58903 |
| H | 0.06521  | 4.12820  | -1.04204 |
| H | -1.24515 | 3.01049  | -1.39831 |
| C | -1.46813 | 4.04387  | 0.48283  |
| H | -2.11242 | 4.79044  | -0.00029 |
| H | -2.14231 | 3.29212  | 0.91735  |
| C | -0.67070 | 4.72141  | 1.60191  |
| H | -1.33553 | 5.23480  | 2.30584  |
| H | -0.07942 | 3.99790  | 2.17366  |
| H | 0.02278  | 5.46655  | 1.19200  |
| H | 3.93221  | 1.05361  | -1.08140 |

#### 4e\_conformer-112

|   |          |          |          |
|---|----------|----------|----------|
| C | -1.25165 | -3.01822 | -0.36489 |
| C | -0.17500 | -1.22373 | 0.52359  |
| N | -0.03869 | -2.38964 | -0.21655 |
| H | 0.85070  | -2.78623 | -0.48532 |
| C | -2.19113 | -2.22216 | 0.26377  |

|   |          |          |          |
|---|----------|----------|----------|
| C | -1.38581 | -4.32523 | -1.07590 |
| H | -2.43733 | -4.62248 | -1.11288 |
| H | -1.01457 | -4.26929 | -2.10719 |
| H | -0.82861 | -5.12661 | -0.57307 |
| C | 0.98072  | -0.35928 | 0.77310  |
| C | 1.15880  | 0.29098  | 2.00377  |
| C | 1.94435  | -0.18102 | -0.24024 |
| C | 2.26632  | 1.11706  | 2.20455  |
| H | 0.45008  | 0.12635  | 2.80730  |
| C | 3.05774  | 0.63407  | -0.02251 |
| H | 1.79044  | -0.66021 | -1.19926 |
| C | 3.21748  | 1.29391  | 1.20525  |
| H | 2.39714  | 1.61738  | 3.16001  |
| H | 4.08548  | 1.92861  | 1.35160  |
| O | 4.03423  | 0.86165  | -0.94909 |
| C | 3.91915  | 0.21593  | -2.21296 |
| H | 4.79679  | 0.51943  | -2.78505 |
| H | 3.91266  | -0.87535 | -2.10440 |
| H | 3.01164  | 0.53173  | -2.74162 |
| C | -1.52752 | -1.09067 | 0.82998  |
| C | -2.22282 | 0.07735  | 1.47380  |
| H | -2.99642 | -0.29507 | 2.15805  |
| H | -1.52294 | 0.65667  | 2.08381  |
| C | -2.88212 | 1.02853  | 0.45233  |
| H | -3.58579 | 0.45742  | -0.16977 |
| H | -3.47815 | 1.76840  | 1.00164  |
| C | -1.86743 | 1.73769  | -0.44994 |
| H | -1.19353 | 2.34358  | 0.17393  |
| H | -1.23601 | 0.98137  | -0.93201 |
| C | -2.49751 | 2.62767  | -1.52992 |
| H | -1.70202 | 2.99804  | -2.19043 |
| H | -3.15801 | 2.01529  | -2.16044 |
| C | -3.28316 | 3.82194  | -0.97849 |
| H | -2.64862 | 4.44206  | -0.33270 |
| H | -3.65814 | 4.45764  | -1.78878 |
| H | -4.14592 | 3.50084  | -0.38449 |
| H | -3.25425 | -2.42428 | 0.30776  |

#### 4e\_conformer-113

|   |         |          |          |
|---|---------|----------|----------|
| C | 2.25556 | -2.22488 | -0.03178 |
| C | 0.57738 | -0.84801 | 0.64880  |
| N | 0.90173 | -2.00108 | -0.05204 |
| H | 0.21991 | -2.65333 | -0.41269 |
| C | 2.81818 | -1.17528 | 0.67341  |
| C | 2.87250 | -3.42695 | -0.66852 |

|   |          |          |          |
|---|----------|----------|----------|
| H | 2.54523  | -4.35977 | -0.19069 |
| H | 2.61815  | -3.50055 | -1.73343 |
| H | 3.96140  | -3.37406 | -0.58564 |
| C | -0.80605 | -0.38208 | 0.71456  |
| C | -1.28064 | 0.35266  | 1.82089  |
| C | -1.69915 | -0.66642 | -0.32865 |
| C | -2.60060 | 0.78474  | 1.85747  |
| H | -0.61824 | 0.56292  | 2.65223  |
| C | -3.03173 | -0.23997 | -0.27758 |
| H | -1.36912 | -1.19776 | -1.21574 |
| C | -3.49328 | 0.49641  | 0.81940  |
| H | -2.95576 | 1.34909  | 2.71535  |
| H | -4.51779 | 0.84255  | 0.87563  |
| O | -3.79765 | -0.58056 | -1.35593 |
| C | -5.15566 | -0.15258 | -1.36922 |
| H | -5.71603 | -0.57498 | -0.52647 |
| H | -5.22982 | 0.94120  | -1.34064 |
| H | -5.57624 | -0.52091 | -2.30583 |
| C | 1.77774  | -0.30210 | 1.10563  |
| C | 2.00502  | 1.01846  | 1.79258  |
| H | 1.51140  | 1.04022  | 2.77330  |
| H | 3.07887  | 1.10887  | 2.00183  |
| C | 1.55798  | 2.26544  | 1.00151  |
| H | 0.47585  | 2.21971  | 0.82794  |
| H | 1.72861  | 3.13780  | 1.64667  |
| C | 2.27822  | 2.49678  | -0.33719 |
| H | 2.14743  | 3.55193  | -0.61812 |
| H | 3.36081  | 2.35477  | -0.19896 |
| C | 1.79922  | 1.63210  | -1.51196 |
| H | 2.00967  | 0.57787  | -1.31089 |
| H | 0.70646  | 1.71669  | -1.59501 |
| C | 2.44971  | 2.04111  | -2.83619 |
| H | 3.54132  | 1.94031  | -2.78560 |
| H | 2.09655  | 1.41853  | -3.66651 |
| H | 2.22678  | 3.08693  | -3.08298 |
| H | 3.87723  | -1.03265 | 0.84886  |

4e\_conformer-114

|   |          |          |          |
|---|----------|----------|----------|
| C | -2.25556 | -2.22488 | -0.03179 |
| C | -0.57737 | -0.84802 | 0.64880  |
| N | -0.90172 | -2.00108 | -0.05204 |
| H | -0.21990 | -2.65334 | -0.41270 |
| C | -2.81817 | -1.17528 | 0.67341  |
| C | -2.87249 | -3.42695 | -0.66852 |
| H | -2.61815 | -3.50056 | -1.73343 |



|   |          |          |          |
|---|----------|----------|----------|
| H | -2.54522 | -4.35977 | -0.19070 |
| H | -3.96140 | -3.37407 | -0.58564 |
| C | 0.80605  | -0.38209 | 0.71456  |
| C | 1.28064  | 0.35265  | 1.82089  |
| C | 1.69915  | -0.66642 | -0.32865 |
| C | 2.60061  | 0.78474  | 1.85747  |
| H | 0.61825  | 0.56291  | 2.65223  |
| C | 3.03173  | -0.23996 | -0.27758 |
| H | 1.36912  | -1.19775 | -1.21575 |
| C | 3.49328  | 0.49642  | 0.81940  |
| H | 2.95577  | 1.34909  | 2.71535  |
| H | 4.51779  | 0.84255  | 0.87563  |
| O | 3.79765  | -0.58055 | -1.35594 |
| C | 5.15566  | -0.15257 | -1.36922 |
| H | 5.22982  | 0.94121  | -1.34064 |
| H | 5.71603  | -0.57498 | -0.52648 |
| H | 5.57624  | -0.52090 | -2.30583 |
| C | -1.77773 | -0.30210 | 1.10563  |
| C | -2.00501 | 1.01845  | 1.79259  |
| H | -3.07887 | 1.10886  | 2.00184  |
| H | -1.51139 | 1.04021  | 2.77331  |
| C | -1.55798 | 2.26544  | 1.00151  |
| H | -1.72859 | 3.13780  | 1.64668  |
| H | -0.47584 | 2.21970  | 0.82794  |
| C | -2.27823 | 2.49679  | -0.33717 |
| H | -3.36081 | 2.35479  | -0.19893 |
| H | -2.14742 | 3.55193  | -0.61811 |
| C | -1.79924 | 1.63210  | -1.51195 |
| H | -0.70649 | 1.71666  | -1.59500 |
| H | -2.00972 | 0.57787  | -1.31088 |
| C | -2.44974 | 2.04113  | -2.83617 |
| H | -3.54135 | 1.94036  | -2.78558 |
| H | -2.22678 | 3.08694  | -3.08296 |
| H | -2.09660 | 1.41854  | -3.66650 |
| H | -3.87722 | -1.03266 | 0.84886  |

4e\_conformer-115

|   |          |         |          |
|---|----------|---------|----------|
| C | -1.00433 | 3.35806 | -0.12116 |
| C | -0.61130 | 1.17531 | 0.38953  |
| N | -1.56464 | 2.11305 | 0.01487  |
| H | -2.55714 | 1.92852 | -0.01738 |
| C | 0.34624  | 3.21450 | 0.14312  |
| C | -1.81568 | 4.56073 | -0.47685 |
| H | -2.57887 | 4.78045 | 0.28120  |
| H | -1.16612 | 5.43620 | -0.56002 |

|   |          |          |          |
|---|----------|----------|----------|
| H | -2.33610 | 4.43455  | -1.43485 |
| C | -0.97907 | -0.22857 | 0.56915  |
| C | -0.27717 | -1.06319 | 1.45461  |
| C | -2.06730 | -0.76716 | -0.15013 |
| C | -0.65213 | -2.39849 | 1.60749  |
| H | 0.54412  | -0.66464 | 2.03741  |
| C | -2.44318 | -2.10095 | 0.02274  |
| H | -2.58700 | -0.14486 | -0.86787 |
| C | -1.72997 | -2.92642 | 0.90459  |
| H | -0.10142 | -3.03356 | 2.29587  |
| H | -2.03341 | -3.96200 | 1.01862  |
| O | -3.48163 | -2.69544 | -0.63524 |
| C | -4.24247 | -1.90253 | -1.54045 |
| H | -5.01927 | -2.55960 | -1.93359 |
| H | -4.70788 | -1.05022 | -1.03072 |
| H | -3.62317 | -1.53471 | -2.36754 |
| C | 0.60845  | 1.85229  | 0.47062  |
| C | 1.97769  | 1.28645  | 0.73928  |
| H | 2.69151  | 2.11893  | 0.78365  |
| H | 2.02422  | 0.80693  | 1.72624  |
| C | 2.45302  | 0.28183  | -0.32433 |
| H | 1.72595  | -0.53620 | -0.39938 |
| H | 2.46148  | 0.78019  | -1.30339 |
| C | 3.83769  | -0.29567 | -0.02376 |
| H | 4.56761  | 0.52335  | 0.05842  |
| H | 3.81893  | -0.78738 | 0.96035  |
| C | 4.31743  | -1.29764 | -1.07841 |
| H | 3.58539  | -2.11349 | -1.15898 |
| H | 4.33636  | -0.80599 | -2.06118 |
| C | 5.69963  | -1.87768 | -0.76848 |
| H | 5.69900  | -2.40197 | 0.19512  |
| H | 6.01835  | -2.59076 | -1.53730 |
| H | 6.45561  | -1.08471 | -0.71297 |
| H | 1.08206  | 4.00796  | 0.10086  |

4e\_conformer-116

|   |          |         |          |
|---|----------|---------|----------|
| C | 0.71378  | 2.67540 | -0.01799 |
| C | -0.24053 | 0.61734 | 0.14376  |
| N | -0.39468 | 1.92012 | -0.31080 |
| H | -1.16260 | 2.23172 | -0.88801 |
| C | 1.58796  | 1.85057 | 0.66602  |
| C | 0.83163  | 4.10599 | -0.43107 |
| H | 0.81343  | 4.22082 | -1.52278 |
| H | 0.01507  | 4.71744 | -0.02632 |
| H | 1.77518  | 4.52168 | -0.06743 |

|   |          |          |          |
|---|----------|----------|----------|
| C | -1.31817 | -0.35921 | -0.00685 |
| C | -1.05459 | -1.73145 | -0.14880 |
| C | -2.66024 | 0.07847  | -0.01629 |
| C | -2.10807 | -2.63784 | -0.28410 |
| H | -0.03194 | -2.08512 | -0.18526 |
| C | -3.70432 | -0.83525 | -0.17093 |
| H | -2.87319 | 1.12951  | 0.13413  |
| C | -3.42920 | -2.20520 | -0.30038 |
| H | -1.89205 | -3.69690 | -0.39454 |
| H | -4.25553 | -2.89962 | -0.41252 |
| O | -5.02589 | -0.49265 | -0.19246 |
| C | -5.36156 | 0.88600  | -0.07491 |
| H | -5.03290 | 1.29687  | 0.88740  |
| H | -4.92079 | 1.47471  | -0.88853 |
| H | -6.44935 | 0.93551  | -0.13777 |
| C | 1.00418  | 0.55193  | 0.77235  |
| C | 1.61338  | -0.62651 | 1.48013  |
| H | 2.14045  | -0.27144 | 2.37633  |
| H | 0.81915  | -1.29469 | 1.83286  |
| C | 2.60918  | -1.44378 | 0.63015  |
| H | 2.90651  | -2.33388 | 1.20225  |
| H | 2.10384  | -1.80993 | -0.27430 |
| C | 3.86303  | -0.66847 | 0.21833  |
| H | 3.57099  | 0.21475  | -0.36425 |
| H | 4.36675  | -0.28809 | 1.11975  |
| C | 4.85020  | -1.50903 | -0.59711 |
| H | 5.14515  | -2.39233 | -0.01324 |
| H | 4.34280  | -1.89152 | -1.49407 |
| C | 6.09941  | -0.72674 | -1.01027 |
| H | 5.83313  | 0.14397  | -1.62211 |
| H | 6.64188  | -0.35896 | -0.13056 |
| H | 6.78909  | -1.34763 | -1.59338 |
| H | 2.54833  | 2.15018  | 1.06543  |

4e\_conformer-117

|   |          |         |          |
|---|----------|---------|----------|
| C | 1.66731  | 2.96171 | -0.16222 |
| C | 0.01783  | 1.42013 | 0.11146  |
| N | 0.34123  | 2.67913 | -0.37555 |
| H | -0.28819 | 3.25811 | -0.91255 |
| C | 2.20421  | 1.87302 | 0.50082  |
| C | 2.29169  | 4.23812 | -0.62297 |
| H | 2.26390  | 4.33772 | -1.71599 |
| H | 1.78431  | 5.11625 | -0.20363 |
| H | 3.33899  | 4.27375 | -0.31120 |
| C | -1.35717 | 0.92776 | 0.04744  |

|   |          |          |          |
|---|----------|----------|----------|
| C | -2.44254 | 1.83180  | 0.06880  |
| C | -1.63780 | -0.44239 | -0.04044 |
| C | -3.74821 | 1.36155  | 0.00352  |
| H | -2.25918 | 2.89697  | 0.16960  |
| C | -2.95710 | -0.90894 | -0.08852 |
| H | -0.83991 | -1.17135 | -0.10239 |
| C | -4.02706 | -0.00714 | -0.07138 |
| H | -4.57394 | 2.06742  | 0.02468  |
| H | -5.05392 | -0.34815 | -0.11493 |
| O | -3.09321 | -2.26585 | -0.16858 |
| C | -4.41110 | -2.79912 | -0.24561 |
| H | -4.99732 | -2.54615 | 0.64604  |
| H | -4.93655 | -2.43803 | -1.13797 |
| H | -4.29272 | -3.88171 | -0.30690 |
| C | 1.18089  | 0.89330  | 0.67655  |
| C | 1.34139  | -0.42216 | 1.38678  |
| H | 2.03562  | -0.29067 | 2.22801  |
| H | 0.38205  | -0.72417 | 1.82321  |
| C | 1.86984  | -1.57424 | 0.50506  |
| H | 1.82683  | -2.50027 | 1.09217  |
| H | 1.19836  | -1.71743 | -0.35319 |
| C | 3.29336  | -1.35229 | -0.01505 |
| H | 3.32615  | -0.40244 | -0.56234 |
| H | 3.97619  | -1.23903 | 0.84064  |
| C | 3.80828  | -2.47285 | -0.92971 |
| H | 3.13056  | -2.57484 | -1.78935 |
| H | 4.78082  | -2.17215 | -1.34170 |
| C | 3.95961  | -3.83063 | -0.23606 |
| H | 4.62015  | -3.75208 | 0.63669  |
| H | 2.99617  | -4.21908 | 0.11178  |
| H | 4.38988  | -4.57554 | -0.91514 |
| H | 3.22838  | 1.78992  | 0.84117  |

#### 4e\_conformer-118

|   |          |         |          |
|---|----------|---------|----------|
| C | -1.66729 | 2.96172 | -0.16224 |
| C | -0.01781 | 1.42013 | 0.11145  |
| N | -0.34120 | 2.67914 | -0.37555 |
| H | 0.28822  | 3.25811 | -0.91256 |
| C | -2.20419 | 1.87303 | 0.50079  |
| C | -2.29165 | 4.23813 | -0.62299 |
| H | -1.78434 | 5.11626 | -0.20356 |
| H | -2.26377 | 4.33778 | -1.71599 |
| H | -3.33899 | 4.27373 | -0.31130 |
| C | 1.35719  | 0.92776 | 0.04744  |
| C | 2.44257  | 1.83178 | 0.06884  |

|   |          |          |          |
|---|----------|----------|----------|
| C | 1.63780  | -0.44239 | -0.04047 |
| C | 3.74823  | 1.36152  | 0.00358  |
| H | 2.25922  | 2.89695  | 0.16967  |
| C | 2.95710  | -0.90896 | -0.08853 |
| H | 0.83991  | -1.17135 | -0.10245 |
| C | 4.02707  | -0.00717 | -0.07135 |
| H | 4.57397  | 2.06738  | 0.02477  |
| H | 5.05393  | -0.34819 | -0.11489 |
| O | 3.09320  | -2.26586 | -0.16862 |
| C | 4.41108  | -2.79915 | -0.24564 |
| H | 4.29269  | -3.88174 | -0.30696 |
| H | 4.93655  | -2.43804 | -1.13798 |
| H | 4.99729  | -2.54621 | 0.64603  |
| C | -1.18088 | 0.89331  | 0.67653  |
| C | -1.34139 | -0.42215 | 1.38677  |
| H | -0.38205 | -0.72417 | 1.82318  |
| H | -2.03560 | -0.29065 | 2.22800  |
| C | -1.86986 | -1.57423 | 0.50506  |
| H | -1.19840 | -1.71744 | -0.35320 |
| H | -1.82685 | -2.50025 | 1.09217  |
| C | -3.29338 | -1.35227 | -0.01503 |
| H | -3.97621 | -1.23901 | 0.84067  |
| H | -3.32618 | -0.40242 | -0.56232 |
| C | -3.80833 | -2.47282 | -0.92968 |
| H | -4.78088 | -2.17211 | -1.34165 |
| H | -3.13063 | -2.57481 | -1.78934 |
| C | -3.95965 | -3.83060 | -0.23604 |
| H | -4.62017 | -3.75206 | 0.63672  |
| H | -4.38994 | -4.57551 | -0.91512 |
| H | -2.99621 | -4.21906 | 0.11178  |
| H | -3.22836 | 1.78993  | 0.84114  |

#### 4e\_conformer-119

|   |          |          |          |
|---|----------|----------|----------|
| C | -1.60112 | 3.37511  | -0.24983 |
| C | -0.14944 | 1.62682  | -0.12751 |
| N | -0.30160 | 3.00260  | -0.01723 |
| H | 0.46556  | 3.64977  | 0.09557  |
| C | -2.30901 | 2.21055  | -0.48983 |
| C | -2.03452 | 4.80449  | -0.23150 |
| H | -1.83239 | 5.28133  | 0.73613  |
| H | -1.52281 | 5.39872  | -0.99986 |
| H | -3.10949 | 4.86950  | -0.41996 |
| C | 1.15295  | 1.00433  | 0.10466  |
| C | 2.10918  | 1.62549  | 0.93798  |
| C | 1.49220  | -0.21582 | -0.49590 |

|   |          |          |          |
|---|----------|----------|----------|
| C | 3.34868  | 1.03281  | 1.14666  |
| H | 1.86674  | 2.55301  | 1.44695  |
| C | 2.73657  | -0.81391 | -0.26836 |
| H | 0.80385  | -0.71789 | -1.16433 |
| C | 3.68141  | -0.18955 | 0.55463  |
| H | 4.07289  | 1.51959  | 1.79402  |
| H | 4.65112  | -0.63433 | 0.74004  |
| O | 2.93783  | -2.00414 | -0.90813 |
| C | 4.19275  | -2.65223 | -0.72875 |
| H | 4.36411  | -2.90666 | 0.32414  |
| H | 4.14397  | -3.56761 | -1.31994 |
| H | 5.01970  | -2.02846 | -1.08911 |
| C | -1.41224 | 1.10496  | -0.42158 |
| C | -1.82454 | -0.33727 | -0.55175 |
| H | -2.87615 | -0.36190 | -0.85892 |
| H | -1.27154 | -0.83999 | -1.35702 |
| C | -1.65150 | -1.14505 | 0.74824  |
| H | -0.62157 | -1.02547 | 1.10335  |
| H | -2.29932 | -0.70991 | 1.52182  |
| C | -1.95587 | -2.64026 | 0.59570  |
| H | -1.28472 | -3.06912 | -0.16363 |
| H | -1.71311 | -3.14931 | 1.53923  |
| C | -3.40778 | -2.96154 | 0.22320  |
| H | -4.07892 | -2.49016 | 0.95542  |
| H | -3.65182 | -2.51356 | -0.74856 |
| C | -3.68335 | -4.46633 | 0.16730  |
| H | -4.72525 | -4.67527 | -0.10090 |
| H | -3.04187 | -4.95564 | -0.57609 |
| H | -3.48500 | -4.93916 | 1.13711  |
| H | -3.37170 | 2.15168  | -0.68991 |

#### 4e\_conformer-120

|   |          |          |          |
|---|----------|----------|----------|
| C | -3.02014 | -1.59097 | -0.29909 |
| C | -0.83306 | -1.11472 | 0.10394  |
| N | -1.72759 | -2.03301 | -0.43010 |
| H | -1.44969 | -2.84618 | -0.96090 |
| C | -2.96100 | -0.37935 | 0.36424  |
| C | -4.18145 | -2.36080 | -0.83780 |
| H | -4.13926 | -2.45676 | -1.93070 |
| H | -4.22593 | -3.37623 | -0.42397 |
| H | -5.11532 | -1.85245 | -0.58324 |
| C | 0.60116  | -1.41683 | 0.11478  |
| C | 1.04374  | -2.74152 | 0.27393  |
| C | 1.56072  | -0.40008 | -0.05493 |
| C | 2.40908  | -3.03380 | 0.26459  |

|   |          |          |          |
|---|----------|----------|----------|
| H | 0.32247  | -3.53691 | 0.43353  |
| C | 2.92412  | -0.69998 | -0.04391 |
| H | 1.22796  | 0.61256  | -0.22595 |
| C | 3.35500  | -2.02583 | 0.11348  |
| H | 2.73897  | -4.06119 | 0.39119  |
| H | 4.41922  | -2.23804 | 0.11230  |
| O | 3.91030  | 0.23187  | -0.19780 |
| C | 3.52238  | 1.59383  | -0.34683 |
| H | 2.92297  | 1.74217  | -1.25321 |
| H | 2.95338  | 1.94459  | 0.52241  |
| H | 4.44942  | 2.16262  | -0.42846 |
| C | -1.59143 | -0.06398 | 0.62175  |
| C | -1.11493 | 1.12356  | 1.41691  |
| H | -1.26365 | 0.92695  | 2.48928  |
| H | -0.03671 | 1.25341  | 1.29469  |
| C | -1.83824 | 2.44319  | 1.08443  |
| H | -2.88632 | 2.36587  | 1.40162  |
| H | -1.39728 | 3.23684  | 1.70070  |
| C | -1.81419 | 2.85655  | -0.39436 |
| H | -2.40142 | 2.13437  | -0.97464 |
| H | -2.32819 | 3.82355  | -0.48846 |
| C | -0.42019 | 2.97149  | -1.02713 |
| H | 0.03169  | 1.97396  | -1.08967 |
| H | -0.53737 | 3.30735  | -2.06587 |
| C | 0.52867  | 3.92494  | -0.29548 |
| H | 0.08729  | 4.92528  | -0.20520 |
| H | 0.75673  | 3.57338  | 0.71710  |
| H | 1.47873  | 4.02677  | -0.83222 |
| H | -3.81839 | 0.22004  | 0.64167  |

#### 4e\_conformer-121

|   |          |          |          |
|---|----------|----------|----------|
| C | 3.02024  | -1.59081 | -0.29908 |
| C | 0.83313  | -1.11469 | 0.10394  |
| N | 1.72771  | -2.03292 | -0.43010 |
| H | 1.44986  | -2.84610 | -0.96091 |
| C | 2.96102  | -0.37919 | 0.36426  |
| C | 4.18159  | -2.36056 | -0.83780 |
| H | 4.22613  | -3.37599 | -0.42397 |
| H | 4.13940  | -2.45651 | -1.93070 |
| H | 5.11543  | -1.85216 | -0.58323 |
| C | -0.60109 | -1.41685 | 0.11477  |
| C | -1.04363 | -2.74156 | 0.27392  |
| C | -1.56068 | -0.40014 | -0.05494 |
| C | -2.40896 | -3.03388 | 0.26457  |
| H | -0.32233 | -3.53693 | 0.43353  |

|   |          |          |          |
|---|----------|----------|----------|
| C | -2.92406 | -0.70007 | -0.04392 |
| H | -1.22795 | 0.61251  | -0.22595 |
| C | -3.35491 | -2.02593 | 0.11346  |
| H | -2.73882 | -4.06128 | 0.39116  |
| H | -4.41912 | -2.23817 | 0.11228  |
| O | -3.91027 | 0.23176  | -0.19780 |
| C | -3.52239 | 1.59373  | -0.34678 |
| H | -2.92298 | 1.74212  | -1.25315 |
| H | -4.44944 | 2.16250  | -0.42840 |
| H | -2.95340 | 1.94447  | 0.52248  |
| C | 1.59143  | -0.06391 | 0.62177  |
| C | 1.11485  | 1.12360  | 1.41694  |
| H | 0.03662  | 1.25337  | 1.29471  |
| H | 1.26358  | 0.92699  | 2.48930  |
| C | 1.83807  | 2.44327  | 1.08446  |
| H | 1.39703  | 3.23690  | 1.70071  |
| H | 2.88614  | 2.36604  | 1.40169  |
| C | 1.81405  | 2.85662  | -0.39433 |
| H | 2.32794  | 3.82368  | -0.48841 |
| H | 2.40139  | 2.13451  | -0.97458 |
| C | 0.42006  | 2.97140  | -1.02718 |
| H | 0.53726  | 3.30731  | -2.06590 |
| H | -0.03168 | 1.97381  | -1.08978 |
| C | -0.52897 | 3.92470  | -0.29555 |
| H | -0.08771 | 4.92509  | -0.20519 |
| H | -1.47899 | 4.02645  | -0.83237 |
| H | -0.75706 | 3.57307  | 0.71699  |
| H | 3.81837  | 0.22024  | 0.64170  |

#### 4e\_conformer-122

|   |          |          |          |
|---|----------|----------|----------|
| C | 0.91924  | 3.12216  | -0.18998 |
| C | 0.06200  | 1.14568  | 0.54302  |
| N | -0.20733 | 2.34351  | -0.10588 |
| H | -1.13517 | 2.65380  | -0.35716 |
| C | 1.94419  | 2.39741  | 0.39195  |
| C | 0.90156  | 4.48228  | -0.80696 |
| H | 0.55705  | 4.45432  | -1.84862 |
| H | 0.24096  | 5.17137  | -0.26460 |
| H | 1.90846  | 4.90817  | -0.79730 |
| C | -0.98986 | 0.14563  | 0.72182  |
| C | -0.98587 | -0.73470 | 1.81612  |
| C | -2.04368 | 0.06161  | -0.21271 |
| C | -2.00543 | -1.67604 | 1.96317  |
| H | -0.20112 | -0.66848 | 2.55998  |
| C | -3.06695 | -0.87426 | -0.04684 |



|   |          |          |          |
|---|----------|----------|----------|
| H | -2.03172 | 0.70748  | -1.08183 |
| C | -3.04830 | -1.75345 | 1.04604  |
| H | -1.99221 | -2.35134 | 2.81420  |
| H | -3.84882 | -2.47825 | 1.15254  |
| O | -4.11909 | -1.01906 | -0.90518 |
| C | -4.18985 | -0.14915 | -2.03004 |
| H | -4.24655 | 0.90117  | -1.71948 |
| H | -3.32748 | -0.28350 | -2.69421 |
| H | -5.10267 | -0.42111 | -2.56156 |
| C | 1.42206  | 1.15682  | 0.86182  |
| C | 2.25089  | 0.05758  | 1.47431  |
| H | 3.27263  | 0.43664  | 1.60608  |
| H | 1.89531  | -0.19120 | 2.48229  |
| C | 2.30721  | -1.23330 | 0.63377  |
| H | 2.88484  | -1.98262 | 1.18957  |
| H | 1.29311  | -1.63860 | 0.52555  |
| C | 2.91746  | -1.02216 | -0.75490 |
| H | 2.37750  | -0.20851 | -1.25522 |
| H | 3.95760  | -0.67932 | -0.64549 |
| C | 2.88471  | -2.26858 | -1.64992 |
| H | 1.84160  | -2.59304 | -1.77411 |
| H | 3.24096  | -1.99429 | -2.65195 |
| C | 3.72308  | -3.43894 | -1.12562 |
| H | 4.76719  | -3.13582 | -0.97650 |
| H | 3.34602  | -3.81008 | -0.16634 |
| H | 3.71595  | -4.27822 | -1.83047 |
| H | 2.97590  | 2.71781  | 0.46693  |

4e\_conformer-123

|   |          |          |          |
|---|----------|----------|----------|
| C | -2.61377 | -1.80677 | -0.67800 |
| C | -0.52727 | -0.96299 | -0.34580 |
| N | -1.42239 | -1.97158 | -0.01737 |
| H | -1.18028 | -2.78593 | 0.52899  |
| C | -2.49284 | -0.64892 | -1.42652 |
| C | -3.73900 | -2.77973 | -0.54333 |
| H | -4.60417 | -2.42883 | -1.11226 |
| H | -3.47022 | -3.77471 | -0.92188 |
| H | -4.04970 | -2.90264 | 0.50192  |
| C | 0.79269  | -0.90888 | 0.27818  |
| C | 1.00404  | -1.43629 | 1.56389  |
| C | 1.88059  | -0.32952 | -0.40446 |
| C | 2.27215  | -1.38289 | 2.14548  |
| H | 0.17351  | -1.85661 | 2.12226  |
| C | 3.13891  | -0.26222 | 0.19527  |
| H | 1.72947  | 0.04761  | -1.40597 |

|   |          |          |          |
|---|----------|----------|----------|
| C | 3.34157  | -0.79753 | 1.47674  |
| H | 2.42331  | -1.79027 | 3.14127  |
| H | 4.32936  | -0.73902 | 1.92212  |
| O | 4.23728  | 0.29446  | -0.39528 |
| C | 4.07257  | 0.89423  | -1.67621 |
| H | 3.77254  | 0.15519  | -2.42895 |
| H | 3.32937  | 1.70029  | -1.64576 |
| H | 5.04704  | 1.30638  | -1.94136 |
| C | -1.18972 | -0.10695 | -1.22755 |
| C | -0.72484 | 1.21353  | -1.78354 |
| H | 0.15075  | 1.07883  | -2.43306 |
| H | -1.51679 | 1.60025  | -2.43804 |
| C | -0.38664 | 2.29811  | -0.73962 |
| H | 0.42932  | 1.94670  | -0.09645 |
| H | 0.00657  | 3.16498  | -1.28772 |
| C | -1.55974 | 2.76490  | 0.13756  |
| H | -1.29034 | 3.73506  | 0.57985  |
| H | -2.43693 | 2.95788  | -0.49849 |
| C | -1.95954 | 1.81888  | 1.27875  |
| H | -2.33535 | 0.87691  | 0.86910  |
| H | -1.06349 | 1.56417  | 1.86217  |
| C | -3.01599 | 2.43532  | 2.19961  |
| H | -2.65336 | 3.36577  | 2.65463  |
| H | -3.93068 | 2.67574  | 1.64296  |
| H | -3.29074 | 1.75085  | 3.01064  |
| H | -3.26967 | -0.21681 | -2.04500 |

4e\_conformer-124

|   |          |          |          |
|---|----------|----------|----------|
| C | 2.61348  | -1.80703 | -0.67802 |
| C | 0.52709  | -0.96299 | -0.34579 |
| N | 1.42209  | -1.97169 | -0.01736 |
| H | 1.17989  | -2.78599 | 0.52903  |
| C | 2.49268  | -0.64918 | -1.42654 |
| C | 3.73859  | -2.78014 | -0.54335 |
| H | 4.60378  | -2.42937 | -1.11233 |
| H | 4.04932  | -2.90304 | 0.50190  |
| H | 3.46966  | -3.77510 | -0.92184 |
| C | -0.79285 | -0.90872 | 0.27824  |
| C | -1.00418 | -1.43602 | 1.56399  |
| C | -1.88074 | -0.32937 | -0.40441 |
| C | -2.27225 | -1.38250 | 2.14564  |
| H | -0.17364 | -1.85634 | 2.12236  |
| C | -3.13904 | -0.26197 | 0.19536  |
| H | -1.72964 | 0.04767  | -1.40596 |
| C | -3.34167 | -0.79714 | 1.47689  |

|   |          |          |          |
|---|----------|----------|----------|
| H | -2.42339 | -1.78979 | 3.14147  |
| H | -4.32944 | -0.73855 | 1.92229  |
| O | -4.23741 | 0.29469  | -0.39520 |
| C | -4.07277 | 0.89422  | -1.67625 |
| H | -3.77278 | 0.15503  | -2.42886 |
| H | -5.04724 | 1.30633  | -1.94143 |
| H | -3.32956 | 1.70027  | -1.64600 |
| C | 1.18964  | -0.10704 | -1.22755 |
| C | 0.72491  | 1.21349  | -1.78354 |
| H | 1.51683  | 1.60003  | -2.43820 |
| H | -0.15081 | 1.07892  | -2.43292 |
| C | 0.38708  | 2.29819  | -0.73963 |
| H | -0.00601 | 3.16512  | -1.28773 |
| H | -0.42888 | 1.94699  | -0.09634 |
| C | 1.56040  | 2.76475  | 0.13738  |
| H | 2.43763  | 2.95724  | -0.49876 |
| H | 1.29140  | 3.73512  | 0.57946  |
| C | 1.95988  | 1.81884  | 1.27877  |
| H | 1.06376  | 1.56472  | 1.86235  |
| H | 2.33519  | 0.87658  | 0.86933  |
| C | 3.01673  | 2.43501  | 2.19935  |
| H | 2.65460  | 3.36577  | 2.65416  |
| H | 3.29122  | 1.75062  | 3.01054  |
| H | 3.93148  | 2.67483  | 1.64254  |
| H | 3.26956  | -0.21718 | -2.04505 |

#### 4e\_conformer-125

|   |          |          |          |
|---|----------|----------|----------|
| C | -1.62886 | 3.11603  | -0.22078 |
| C | -0.05761 | 1.49365  | 0.04267  |
| N | -0.28373 | 2.84127  | -0.20321 |
| H | 0.43868  | 3.50155  | -0.45231 |
| C | -2.28220 | 1.92692  | 0.04885  |
| C | -2.15546 | 4.48557  | -0.50078 |
| H | -1.77571 | 5.22467  | 0.21621  |
| H | -1.87906 | 4.83458  | -1.50435 |
| H | -3.24688 | 4.48485  | -0.43645 |
| C | 1.30201  | 0.96646  | 0.14127  |
| C | 2.35811  | 1.78452  | 0.59943  |
| C | 1.59486  | -0.35547 | -0.22080 |
| C | 3.64933  | 1.27849  | 0.68535  |
| H | 2.15646  | 2.80318  | 0.91597  |
| C | 2.89540  | -0.86281 | -0.11397 |
| H | 0.82701  | -1.00657 | -0.61988 |
| C | 3.93786  | -0.04533 | 0.33754  |
| H | 4.45284  | 1.91656  | 1.04278  |

|   |          |          |          |
|---|----------|----------|----------|
| H | 4.95153  | -0.41722 | 0.41993  |
| O | 3.04618  | -2.16656 | -0.49288 |
| C | 4.35159  | -2.73142 | -0.42932 |
| H | 4.73879  | -2.72828 | 0.59671  |
| H | 4.24934  | -3.76077 | -0.77541 |
| H | 5.05126  | -2.19463 | -1.08131 |
| C | -1.30716 | 0.89898  | 0.21692  |
| C | -1.60795 | -0.53502 | 0.54673  |
| H | -0.74684 | -0.99868 | 1.04387  |
| H | -2.43428 | -0.56723 | 1.26764  |
| C | -1.98950 | -1.37241 | -0.68882 |
| H | -2.89468 | -0.94556 | -1.13916 |
| H | -1.20304 | -1.26723 | -1.44772 |
| C | -2.19447 | -2.86389 | -0.38991 |
| H | -2.43424 | -3.38048 | -1.33000 |
| H | -1.24286 | -3.28810 | -0.03923 |
| C | -3.28823 | -3.18127 | 0.64191  |
| H | -3.33482 | -4.27035 | 0.77330  |
| H | -3.00580 | -2.77197 | 1.62055  |
| C | -4.67566 | -2.66098 | 0.25437  |
| H | -4.97560 | -3.03769 | -0.73158 |
| H | -5.43338 | -2.97884 | 0.97940  |
| H | -4.69934 | -1.56624 | 0.21104  |
| H | -3.35521 | 1.80582  | 0.13147  |

#### 4e\_conformer-126

|   |          |          |          |
|---|----------|----------|----------|
| C | 1.62885  | 3.11603  | -0.22077 |
| C | 0.05760  | 1.49365  | 0.04267  |
| N | 0.28372  | 2.84127  | -0.20321 |
| H | -0.43868 | 3.50155  | -0.45231 |
| C | 2.28219  | 1.92692  | 0.04886  |
| C | 2.15545  | 4.48558  | -0.50077 |
| H | 1.87905  | 4.83459  | -1.50434 |
| H | 1.77570  | 5.22467  | 0.21622  |
| H | 3.24687  | 4.48486  | -0.43644 |
| C | -1.30201 | 0.96646  | 0.14126  |
| C | -2.35812 | 1.78452  | 0.59942  |
| C | -1.59486 | -0.35547 | -0.22079 |
| C | -3.64933 | 1.27848  | 0.68534  |
| H | -2.15647 | 2.80318  | 0.91596  |
| C | -2.89540 | -0.86282 | -0.11397 |
| H | -0.82701 | -1.00658 | -0.61987 |
| C | -3.93786 | -0.04533 | 0.33753  |
| H | -4.45285 | 1.91656  | 1.04276  |
| H | -4.95154 | -0.41722 | 0.41992  |

|   |          |          |          |
|---|----------|----------|----------|
| O | -3.04618 | -2.16656 | -0.49287 |
| C | -4.35158 | -2.73143 | -0.42931 |
| H | -5.05126 | -2.19465 | -1.08131 |
| H | -4.24933 | -3.76078 | -0.77539 |
| H | -4.73879 | -2.72829 | 0.59672  |
| C | 1.30715  | 0.89899  | 0.21693  |
| C | 1.60795  | -0.53501 | 0.54674  |
| H | 2.43427  | -0.56722 | 1.26764  |
| H | 0.74684  | -0.99868 | 1.04387  |
| C | 1.98950  | -1.37240 | -0.68882 |
| H | 1.20305  | -1.26723 | -1.44772 |
| H | 2.89469  | -0.94555 | -1.13916 |
| C | 2.19448  | -2.86389 | -0.38991 |
| H | 1.24287  | -3.28810 | -0.03923 |
| H | 2.43425  | -3.38047 | -1.33000 |
| C | 3.28824  | -3.18126 | 0.64191  |
| H | 3.00582  | -2.77196 | 1.62055  |
| H | 3.33483  | -4.27034 | 0.77330  |
| C | 4.67567  | -2.66097 | 0.25437  |
| H | 4.97561  | -3.03768 | -0.73159 |
| H | 4.69935  | -1.56623 | 0.21103  |
| H | 5.43340  | -2.97883 | 0.97939  |
| H | 3.35520  | 1.80582  | 0.13148  |

4e\_conformer-127

|   |          |          |          |
|---|----------|----------|----------|
| C | 2.37987  | -2.17656 | 0.05981  |
| C | 0.71913  | -0.72808 | 0.62686  |
| N | 1.02372  | -1.96991 | 0.08565  |
| H | 0.33478  | -2.67629 | -0.12996 |
| C | 2.96346  | -1.02969 | 0.56849  |
| C | 2.98028  | -3.45259 | -0.43230 |
| H | 2.68208  | -3.67246 | -1.46526 |
| H | 4.07116  | -3.38559 | -0.40424 |
| H | 2.68130  | -4.31175 | 0.18245  |
| C | -0.66953 | -0.28394 | 0.72846  |
| C | -1.08080 | 0.61917  | 1.73069  |
| C | -1.63309 | -0.75813 | -0.17433 |
| C | -2.40718 | 1.02676  | 1.80250  |
| H | -0.36447 | 0.98072  | 2.45832  |
| C | -2.97012 | -0.35279 | -0.08720 |
| H | -1.35791 | -1.42413 | -0.98599 |
| C | -3.36839 | 0.55097  | 0.90445  |
| H | -2.71179 | 1.72213  | 2.57983  |
| H | -4.39578 | 0.88335  | 0.98537  |
| O | -3.80587 | -0.88519 | -1.02703 |

|   |          |          |          |
|---|----------|----------|----------|
| C | -5.17249 | -0.48586 | -1.00477 |
| H | -5.65610 | -0.76821 | -0.06188 |
| H | -5.27462 | 0.59584  | -1.15372 |
| H | -5.65168 | -1.01327 | -1.83059 |
| C | 1.93467  | -0.10982 | 0.92632  |
| C | 2.18040  | 1.28966  | 1.42701  |
| H | 1.74049  | 1.42507  | 2.42400  |
| H | 3.26242  | 1.41343  | 1.56597  |
| C | 1.67364  | 2.42988  | 0.51914  |
| H | 0.59760  | 2.31219  | 0.35012  |
| H | 1.79106  | 3.36795  | 1.07821  |
| C | 2.40914  | 2.58214  | -0.82314 |
| H | 2.17445  | 3.57735  | -1.22821 |
| H | 3.49197  | 2.58138  | -0.63103 |
| C | 2.09438  | 1.54171  | -1.91147 |
| H | 2.73199  | 1.75881  | -2.78000 |
| H | 2.37256  | 0.54189  | -1.56444 |
| C | 0.62992  | 1.53827  | -2.35943 |
| H | 0.32134  | 2.53248  | -2.70824 |
| H | 0.47323  | 0.83253  | -3.18384 |
| H | -0.04083 | 1.24475  | -1.54649 |
| H | 4.02807  | -0.85378 | 0.65975  |

#### 4e\_conformer-128

|   |          |          |          |
|---|----------|----------|----------|
| C | 2.37992  | 2.17656  | 0.05970  |
| C | 0.71917  | 0.72812  | 0.62682  |
| N | 1.02377  | 1.96993  | 0.08558  |
| H | 0.33483  | 2.67631  | -0.13007 |
| C | 2.96351  | 1.02970  | 0.56840  |
| C | 2.98034  | 3.45258  | -0.43246 |
| H | 2.68206  | 3.67245  | -1.46539 |
| H | 2.68142  | 4.31174  | 0.18231  |
| H | 4.07122  | 3.38553  | -0.40448 |
| C | -0.66950 | 0.28399  | 0.72846  |
| C | -1.08076 | -0.61908 | 1.73072  |
| C | -1.63307 | 0.75817  | -0.17433 |
| C | -2.40714 | -1.02666 | 1.80256  |
| H | -0.36442 | -0.98062 | 2.45835  |
| C | -2.97010 | 0.35283  | -0.08717 |
| H | -1.35790 | 1.42415  | -0.98601 |
| C | -3.36836 | -0.55090 | 0.90451  |
| H | -2.71174 | -1.72201 | 2.57992  |
| H | -4.39575 | -0.88327 | 0.98545  |
| O | -3.80586 | 0.88521  | -1.02701 |
| C | -5.17247 | 0.48587  | -1.00473 |

|   |          |          |          |
|---|----------|----------|----------|
| H | -5.27459 | -0.59584 | -1.15366 |
| H | -5.65608 | 0.76824  | -0.06185 |
| H | -5.65167 | 1.01324  | -1.83057 |
| C | 1.93471  | 0.10985  | 0.92628  |
| C | 2.18045  | -1.28960 | 1.42704  |
| H | 3.26247  | -1.41335 | 1.56601  |
| H | 1.74053  | -1.42497 | 2.42403  |
| C | 1.67372  | -2.42987 | 0.51922  |
| H | 1.79124  | -3.36793 | 1.07830  |
| H | 0.59766  | -2.31227 | 0.35026  |
| C | 2.40914  | -2.58211 | -0.82310 |
| H | 3.49199  | -2.58117 | -0.63107 |
| H | 2.17459  | -3.57739 | -1.22808 |
| C | 2.09413  | -1.54182 | -1.91149 |
| H | 2.37222  | -0.54193 | -1.56458 |
| H | 2.73169  | -1.75891 | -2.78007 |
| C | 0.62963  | -1.53863 | -2.35930 |
| H | 0.32116  | -2.53291 | -2.70799 |
| H | -0.04108 | -1.24512 | -1.54631 |
| H | 0.47275  | -0.83298 | -3.18375 |
| H | 4.02812  | 0.85378  | 0.65965  |

#### 4e\_conformer-129

|   |          |          |          |
|---|----------|----------|----------|
| C | -1.79481 | 2.69057  | -0.17001 |
| C | -0.04971 | 1.25459  | 0.08002  |
| N | -0.43119 | 2.55060  | -0.23886 |
| H | 0.20045  | 3.25833  | -0.58525 |
| C | -2.30104 | 1.46688  | 0.22903  |
| C | -2.47957 | 3.97573  | -0.50271 |
| H | -2.12031 | 4.80414  | 0.12107  |
| H | -2.32282 | 4.26561  | -1.54998 |
| H | -3.55634 | 3.87584  | -0.34175 |
| C | 1.36418  | 0.88530  | 0.12694  |
| C | 2.34398  | 1.84728  | 0.45866  |
| C | 1.78647  | -0.42002 | -0.15835 |
| C | 3.68740  | 1.49509  | 0.49696  |
| H | 2.04528  | 2.85864  | 0.71625  |
| C | 3.14081  | -0.77088 | -0.10049 |
| H | 1.07779  | -1.18124 | -0.45928 |
| C | 4.10628  | 0.18857  | 0.22459  |
| H | 4.43082  | 2.24355  | 0.75707  |
| H | 5.15901  | -0.06158 | 0.26731  |
| O | 3.41861  | -2.07517 | -0.39643 |
| C | 4.78166  | -2.48611 | -0.37803 |
| H | 5.22297  | -2.36207 | 0.61823  |

|   |          |          |          |
|---|----------|----------|----------|
| H | 4.77892  | -3.54383 | -0.64453 |
| H | 5.37745  | -1.92673 | -1.10943 |
| C | -1.21631 | 0.55189  | 0.38737  |
| C | -1.32998 | -0.87426 | 0.85018  |
| H | -0.39445 | -1.17993 | 1.33274  |
| H | -2.10597 | -0.93958 | 1.62326  |
| C | -1.65549 | -1.88744 | -0.26897 |
| H | -0.86496 | -1.84548 | -1.02952 |
| H | -1.61755 | -2.89832 | 0.15697  |
| C | -3.00478 | -1.66789 | -0.96835 |
| H | -2.99738 | -0.68369 | -1.45304 |
| H | -3.10230 | -2.40998 | -1.77323 |
| C | -4.23949 | -1.76539 | -0.05904 |
| H | -4.20984 | -0.97139 | 0.69825  |
| H | -5.13215 | -1.56717 | -0.66693 |
| C | -4.39601 | -3.12068 | 0.63738  |
| H | -3.57487 | -3.31374 | 1.33671  |
| H | -5.33138 | -3.16670 | 1.20654  |
| H | -4.40738 | -3.93891 | -0.09366 |
| H | -3.34711 | 1.25210  | 0.40466  |

#### 4e\_conformer-130

|   |          |          |          |
|---|----------|----------|----------|
| C | -0.58680 | 3.16553  | -0.38222 |
| C | -0.02604 | 1.00495  | 0.05270  |
| N | 0.37024  | 2.19381  | -0.54543 |
| H | 1.18397  | 2.28317  | -1.13716 |
| C | -1.60257 | 2.60162  | 0.36598  |
| C | -0.43797 | 4.53180  | -0.96771 |
| H | 0.47496  | 5.02963  | -0.61688 |
| H | -0.39321 | 4.50596  | -2.06441 |
| H | -1.29097 | 5.15367  | -0.68311 |
| C | 0.85597  | -0.16376 | 0.02569  |
| C | 0.34540  | -1.46368 | -0.10580 |
| C | 2.25245  | 0.01441  | 0.11122  |
| C | 1.21057  | -2.55895 | -0.13259 |
| H | -0.71908 | -1.61176 | -0.21963 |
| C | 3.11051  | -1.08682 | 0.06461  |
| H | 2.64790  | 1.01380  | 0.24456  |
| C | 2.58760  | -2.38397 | -0.05124 |
| H | 0.80331  | -3.56090 | -0.23633 |
| H | 3.27191  | -3.22577 | -0.07890 |
| O | 4.47105  | -1.00194 | 0.13961  |
| C | 5.05517  | 0.29192  | 0.25045  |
| H | 4.79952  | 0.92026  | -0.61131 |
| H | 4.73839  | 0.79581  | 1.17161  |



|   |          |          |          |
|---|----------|----------|----------|
| H | 6.13375  | 0.13189  | 0.27691  |
| C | -1.26406 | 1.24174  | 0.64816  |
| C | -2.08469 | 0.32261  | 1.51292  |
| H | -1.54023 | -0.60918 | 1.69900  |
| H | -2.22481 | 0.79322  | 2.49606  |
| C | -3.48103 | 0.01724  | 0.92821  |
| H | -4.10043 | -0.45389 | 1.70387  |
| H | -3.96584 | 0.97053  | 0.68330  |
| C | -3.45474 | -0.88284 | -0.31484 |
| H | -4.39016 | -0.76519 | -0.87823 |
| H | -2.65298 | -0.54259 | -0.98576 |
| C | -3.26919 | -2.37087 | 0.01042  |
| H | -2.42028 | -2.50452 | 0.69389  |
| H | -4.15210 | -2.72518 | 0.55981  |
| C | -3.05544 | -3.23178 | -1.23670 |
| H | -2.14352 | -2.93267 | -1.76851 |
| H | -2.96110 | -4.29347 | -0.98217 |
| H | -3.89413 | -3.12680 | -1.93588 |
| H | -2.49584 | 3.11781  | 0.69482  |

#### 4e\_conformer-131

|   |          |          |          |
|---|----------|----------|----------|
| C | 0.58676  | 3.16553  | -0.38221 |
| C | 0.02604  | 1.00494  | 0.05271  |
| N | -0.37026 | 2.19380  | -0.54542 |
| H | -1.18401 | 2.28315  | -1.13713 |
| C | 1.60255  | 2.60163  | 0.36598  |
| C | 0.43791  | 4.53179  | -0.96770 |
| H | 1.29090  | 5.15369  | -0.68309 |
| H | 0.39315  | 4.50596  | -2.06440 |
| H | -0.47503 | 5.02961  | -0.61687 |
| C | -0.85597 | -0.16377 | 0.02571  |
| C | -0.34539 | -1.46369 | -0.10576 |
| C | -2.25244 | 0.01440  | 0.11122  |
| C | -1.21056 | -2.55897 | -0.13255 |
| H | 0.71909  | -1.61177 | -0.21959 |
| C | -3.11051 | -1.08683 | 0.06462  |
| H | -2.64790 | 1.01379  | 0.24454  |
| C | -2.58760 | -2.38399 | -0.05122 |
| H | -0.80330 | -3.56092 | -0.23628 |
| H | -3.27190 | -3.22579 | -0.07887 |
| O | -4.47105 | -1.00195 | 0.13960  |
| C | -5.05517 | 0.29191  | 0.25041  |
| H | -6.13375 | 0.13188  | 0.27686  |
| H | -4.73840 | 0.79581  | 1.17156  |
| H | -4.79951 | 0.92023  | -0.61136 |

|   |         |          |          |
|---|---------|----------|----------|
| C | 1.26406 | 1.24175  | 0.64815  |
| C | 2.08471 | 0.32263  | 1.51291  |
| H | 2.22484 | 0.79325  | 2.49604  |
| H | 1.54027 | -0.60916 | 1.69900  |
| C | 3.48105 | 0.01727  | 0.92819  |
| H | 3.96585 | 0.97056  | 0.68326  |
| H | 4.10047 | -0.45385 | 1.70383  |
| C | 3.45477 | -0.88282 | -0.31487 |
| H | 2.65300 | -0.54257 | -0.98579 |
| H | 4.39018 | -0.76518 | -0.87826 |
| C | 3.26921 | -2.37085 | 0.01040  |
| H | 4.15212 | -2.72515 | 0.55980  |
| H | 2.42029 | -2.50449 | 0.69388  |
| C | 3.05546 | -3.23176 | -1.23671 |
| H | 3.89414 | -3.12679 | -1.93589 |
| H | 2.96112 | -4.29345 | -0.98216 |
| H | 2.14353 | -2.93266 | -1.76851 |
| H | 2.49581 | 3.11783  | 0.69481  |

4e\_conformer-132

|   |          |          |          |
|---|----------|----------|----------|
| C | 0.78143  | 2.78368  | -0.11763 |
| C | -0.11421 | 0.71303  | 0.16986  |
| N | -0.29101 | 1.97079  | -0.39225 |
| H | -1.03794 | 2.20307  | -1.03120 |
| C | 1.64932  | 2.04683  | 0.66600  |
| C | 0.87258  | 4.18018  | -0.64005 |
| H | 0.89095  | 4.20748  | -1.73743 |
| H | 0.02407  | 4.79516  | -0.31400 |
| H | 1.78948  | 4.65361  | -0.27881 |
| C | -1.15181 | -0.31081 | 0.03161  |
| C | -0.83266 | -1.67143 | -0.09998 |
| C | -2.50863 | 0.07560  | 0.01182  |
| C | -1.84930 | -2.61984 | -0.22980 |
| H | 0.20426  | -1.98030 | -0.13491 |
| C | -3.51603 | -0.87992 | -0.13766 |
| H | -2.75940 | 1.12053  | 0.14670  |
| C | -3.18638 | -2.23895 | -0.25257 |
| H | -1.59211 | -3.67052 | -0.33196 |
| H | -3.98455 | -2.96621 | -0.36077 |
| O | -4.84986 | -0.58964 | -0.16792 |
| C | -5.23950 | 0.77575  | -0.06225 |
| H | -4.92955 | 1.20665  | 0.89748  |
| H | -4.82003 | 1.37481  | -0.87956 |
| H | -6.32822 | 0.78215  | -0.12802 |
| C | 1.09864  | 0.74198  | 0.85597  |

|   |         |          |          |
|---|---------|----------|----------|
| C | 1.71836 | -0.33011 | 1.71051  |
| H | 1.86722 | 0.06389  | 2.72565  |
| H | 1.03379 | -1.17952 | 1.80940  |
| C | 3.08236 | -0.81897 | 1.18326  |
| H | 3.75075 | 0.04694  | 1.09837  |
| H | 3.53560 | -1.48838 | 1.92748  |
| C | 2.99734 | -1.54519 | -0.16218 |
| H | 2.38531 | -2.44938 | -0.03598 |
| H | 2.46518 | -0.90887 | -0.88279 |
| C | 4.35801 | -1.94629 | -0.75005 |
| H | 4.90430 | -2.55828 | -0.01826 |
| H | 4.18900 | -2.59129 | -1.62249 |
| C | 5.22629 | -0.75664 | -1.17314 |
| H | 4.69703 | -0.12676 | -1.89912 |
| H | 5.49448 | -0.12378 | -0.32015 |
| H | 6.15887 | -1.09427 | -1.63934 |
| H | 2.58257 | 2.41148  | 1.07655  |

4e\_conformer-133

|   |          |          |          |
|---|----------|----------|----------|
| C | 1.34265  | 3.28204  | -0.34095 |
| C | -0.07243 | 1.51100  | -0.13794 |
| N | 0.05947  | 2.89079  | -0.05545 |
| H | -0.71423 | 3.52657  | 0.07544  |
| C | 2.06203  | 2.12633  | -0.58929 |
| C | 1.75065  | 4.71879  | -0.36023 |
| H | 1.57336  | 5.20757  | 0.60628  |
| H | 2.81712  | 4.79949  | -0.58698 |
| H | 1.20205  | 5.29129  | -1.11954 |
| C | -1.35287 | 0.86897  | 0.15326  |
| C | -2.30101 | 1.49326  | 0.98342  |
| C | -1.66586 | -0.38952 | -0.39933 |
| C | -3.52388 | 0.87393  | 1.24629  |
| H | -2.07308 | 2.44489  | 1.45300  |
| C | -2.88257 | -1.00940 | -0.11195 |
| H | -0.95783 | -0.86240 | -1.06357 |
| C | -3.82472 | -0.37362 | 0.71072  |
| H | -4.24592 | 1.36639  | 1.89167  |
| H | -4.76663 | -0.87126 | 0.91717  |
| O | -3.24844 | -2.23223 | -0.59814 |
| C | -2.30625 | -2.94220 | -1.39519 |
| H | -2.07411 | -2.40037 | -2.32002 |
| H | -1.37665 | -3.12725 | -0.84276 |
| H | -2.77912 | -3.89373 | -1.64164 |
| C | 1.18854  | 1.00658  | -0.47152 |
| C | 1.62601  | -0.42841 | -0.60164 |

|   |         |          |          |
|---|---------|----------|----------|
| H | 1.06313 | -0.94978 | -1.38848 |
| H | 2.66850 | -0.43286 | -0.94020 |
| C | 1.51369 | -1.22968 | 0.70804  |
| H | 2.17608 | -0.77441 | 1.45505  |
| H | 0.49603 | -1.13004 | 1.10184  |
| C | 1.83347 | -2.72213 | 0.54737  |
| H | 1.71270 | -3.21435 | 1.52263  |
| H | 1.08434 | -3.17354 | -0.11962 |
| C | 3.23433 | -3.03964 | 0.00155  |
| H | 3.33744 | -4.12984 | -0.07812 |
| H | 3.33048 | -2.65266 | -1.02133 |
| C | 4.37366 | -2.48741 | 0.86342  |
| H | 4.29268 | -2.84460 | 1.89773  |
| H | 5.34971 | -2.80068 | 0.47602  |
| H | 4.36521 | -1.39195 | 0.89056  |
| H | 3.11739 | 2.08245  | -0.82816 |

4e\_conformer-134

|   |          |          |          |
|---|----------|----------|----------|
| C | -1.34262 | 3.28205  | -0.34096 |
| C | 0.07245  | 1.51100  | -0.13793 |
| N | -0.05945 | 2.89079  | -0.05545 |
| H | 0.71425  | 3.52656  | 0.07545  |
| C | -2.06202 | 2.12633  | -0.58930 |
| C | -1.75062 | 4.71880  | -0.36024 |
| H | -1.57333 | 5.20759  | 0.60626  |
| H | -1.20202 | 5.29129  | -1.11956 |
| H | -2.81709 | 4.79950  | -0.58700 |
| C | 1.35288  | 0.86896  | 0.15327  |
| C | 2.30102  | 1.49323  | 0.98344  |
| C | 1.66586  | -0.38952 | -0.39933 |
| C | 3.52388  | 0.87389  | 1.24630  |
| H | 2.07310  | 2.44487  | 1.45302  |
| C | 2.88257  | -1.00941 | -0.11196 |
| H | 0.95782  | -0.86239 | -1.06358 |
| C | 3.82472  | -0.37366 | 0.71073  |
| H | 4.24593  | 1.36634  | 1.89169  |
| H | 4.76662  | -0.87131 | 0.91717  |
| O | 3.24842  | -2.23224 | -0.59815 |
| C | 2.30623  | -2.94219 | -1.39524 |
| H | 2.07413  | -2.40035 | -2.32006 |
| H | 2.77909  | -3.89372 | -1.64169 |
| H | 1.37663  | -3.12723 | -0.84282 |
| C | -1.18853 | 1.00659  | -0.47152 |
| C | -1.62601 | -0.42841 | -0.60162 |
| H | -2.66848 | -0.43285 | -0.94021 |

|   |          |          |          |
|---|----------|----------|----------|
| H | -1.06311 | -0.94979 | -1.38844 |
| C | -1.51372 | -1.22965 | 0.70807  |
| H | -0.49607 | -1.13001 | 1.10190  |
| H | -2.17613 | -0.77437 | 1.45505  |
| C | -1.83349 | -2.72211 | 0.54742  |
| H | -1.08434 | -3.17353 | -0.11955 |
| H | -1.71275 | -3.21431 | 1.52269  |
| C | -3.23434 | -3.03963 | 0.00156  |
| H | -3.33045 | -2.65269 | -1.02134 |
| H | -3.33744 | -4.12984 | -0.07808 |
| C | -4.37370 | -2.48738 | 0.86338  |
| H | -5.34973 | -2.80066 | 0.47596  |
| H | -4.29274 | -2.84453 | 1.89770  |
| H | -4.36525 | -1.39192 | 0.89048  |
| H | -3.11737 | 2.08247  | -0.82818 |

#### 4e\_conformer-135

|   |          |          |          |
|---|----------|----------|----------|
| C | 0.57921  | 3.35171  | -0.07752 |
| C | 0.44647  | 1.08180  | -0.06354 |
| N | 1.26771  | 2.18042  | -0.27838 |
| H | 2.20315  | 2.12439  | -0.65499 |
| C | -0.70300 | 3.00038  | 0.30425  |
| C | 1.21372  | 4.68909  | -0.27800 |
| H | 2.09543  | 4.82370  | 0.36152  |
| H | 1.53934  | 4.83762  | -1.31591 |
| H | 0.49887  | 5.48011  | -0.03595 |
| C | 0.96195  | -0.28083 | -0.18475 |
| C | 0.13783  | -1.34245 | -0.59374 |
| C | 2.31684  | -0.54618 | 0.10759  |
| C | 0.65609  | -2.63505 | -0.69132 |
| H | -0.89360 | -1.15461 | -0.86440 |
| C | 2.82833  | -1.83984 | -0.01220 |
| H | 2.94776  | 0.26020  | 0.46056  |
| C | 1.99234  | -2.89507 | -0.40830 |
| H | 0.00929  | -3.44836 | -1.00864 |
| H | 2.40829  | -3.89421 | -0.48772 |
| O | 4.12482  | -2.17886 | 0.24984  |
| C | 5.01904  | -1.14506 | 0.64829  |
| H | 4.70444  | -0.68691 | 1.59379  |
| H | 5.98957  | -1.62432 | 0.78280  |
| H | 5.09839  | -0.36755 | -0.12113 |
| C | -0.80048 | 1.57695  | 0.31780  |
| C | -2.01882 | 0.78824  | 0.70393  |
| H | -1.71930 | -0.21133 | 1.03558  |
| H | -2.50651 | 1.26644  | 1.56461  |

|   |          |          |          |
|---|----------|----------|----------|
| C | -3.05376 | 0.67522  | -0.43259 |
| H | -3.37323 | 1.68809  | -0.71022 |
| H | -2.56885 | 0.25676  | -1.32586 |
| C | -4.28142 | -0.17214 | -0.07478 |
| H | -4.73786 | 0.21762  | 0.84722  |
| H | -5.03804 | -0.05537 | -0.86325 |
| C | -3.98386 | -1.66662 | 0.09999  |
| H | -3.50711 | -2.04553 | -0.81544 |
| H | -3.25462 | -1.81254 | 0.90696  |
| C | -5.23972 | -2.48827 | 0.40131  |
| H | -5.97594 | -2.39259 | -0.40628 |
| H | -5.00555 | -3.55256 | 0.51740  |
| H | -5.71880 | -2.14789 | 1.32760  |
| H | -1.49206 | 3.69547  | 0.56302  |

4e\_conformer-136

|   |          |          |          |
|---|----------|----------|----------|
| C | -0.57920 | 3.35173  | -0.07752 |
| C | -0.44647 | 1.08181  | -0.06353 |
| N | -1.26771 | 2.18044  | -0.27839 |
| H | -2.20315 | 2.12442  | -0.65500 |
| C | 0.70299  | 3.00039  | 0.30426  |
| C | -1.21371 | 4.68910  | -0.27800 |
| H | -0.49887 | 5.48013  | -0.03593 |
| H | -1.53931 | 4.83765  | -1.31593 |
| H | -2.09544 | 4.82372  | 0.36150  |
| C | -0.96195 | -0.28082 | -0.18475 |
| C | -0.13781 | -1.34243 | -0.59374 |
| C | -2.31683 | -0.54619 | 0.10759  |
| C | -0.65606 | -2.63504 | -0.69132 |
| H | 0.89361  | -1.15457 | -0.86440 |
| C | -2.82830 | -1.83985 | -0.01221 |
| H | -2.94777 | 0.26018  | 0.46056  |
| C | -1.99231 | -2.89507 | -0.40830 |
| H | -0.00925 | -3.44834 | -1.00864 |
| H | -2.40824 | -3.89422 | -0.48772 |
| O | -4.12479 | -2.17889 | 0.24983  |
| C | -5.01903 | -1.14510 | 0.64829  |
| H | -5.09839 | -0.36759 | -0.12113 |
| H | -5.98955 | -1.62437 | 0.78279  |
| H | -4.70443 | -0.68695 | 1.59378  |
| C | 0.80048  | 1.57696  | 0.31781  |
| C | 2.01881  | 0.78826  | 0.70394  |
| H | 2.50651  | 1.26645  | 1.56462  |
| H | 1.71929  | -0.21132 | 1.03559  |
| C | 3.05375  | 0.67523  | -0.43258 |

|   |         |          |          |
|---|---------|----------|----------|
| H | 2.56884 | 0.25677  | -1.32585 |
| H | 3.37324 | 1.68809  | -0.71021 |
| C | 4.28140 | -0.17215 | -0.07477 |
| H | 4.73784 | 0.21759  | 0.84723  |
| H | 5.03803 | -0.05538 | -0.86324 |
| C | 3.98382 | -1.66663 | 0.09998  |
| H | 3.25457 | -1.81255 | 0.90694  |
| H | 3.50707 | -2.04553 | -0.81546 |
| C | 5.23967 | -2.48830 | 0.40130  |
| H | 5.71875 | -2.14793 | 1.32760  |
| H | 5.00548 | -3.55259 | 0.51738  |
| H | 5.97590 | -2.39263 | -0.40628 |
| H | 1.49206 | 3.69549  | 0.56303  |

4e\_conformer-137

|   |          |          |          |
|---|----------|----------|----------|
| C | -0.84758 | 3.21997  | 0.01915  |
| C | 0.01569  | 1.14156  | 0.35678  |
| N | 0.29984  | 2.46990  | 0.06961  |
| H | 1.23354  | 2.85321  | 0.03246  |
| C | -1.89837 | 2.35057  | 0.25271  |
| C | -0.82478 | 4.69189  | -0.23414 |
| H | -0.27947 | 5.23509  | 0.54876  |
| H | -0.34636 | 4.93483  | -1.19154 |
| H | -1.84628 | 5.08063  | -0.26068 |
| C | 1.08933  | 0.15186  | 0.43211  |
| C | 0.96745  | -1.00893 | 1.22500  |
| C | 2.28125  | 0.34355  | -0.28280 |
| C | 2.00621  | -1.92992 | 1.28087  |
| H | 0.07055  | -1.17301 | 1.80932  |
| C | 3.32878  | -0.58209 | -0.20981 |
| H | 2.40993  | 1.20011  | -0.93694 |
| C | 3.19704  | -1.73432 | 0.57347  |
| H | 1.89979  | -2.81866 | 1.89685  |
| H | 3.99167  | -2.46708 | 0.63827  |
| O | 4.43304  | -0.27619 | -0.95328 |
| C | 5.52253  | -1.19279 | -0.93450 |
| H | 5.93094  | -1.30736 | 0.07682  |
| H | 5.22365  | -2.17612 | -1.31715 |
| H | 6.28452  | -0.76512 | -1.58739 |
| C | -1.37368 | 1.04358  | 0.47229  |
| C | -2.21562 | -0.18739 | 0.67834  |
| H | -1.96282 | -0.69415 | 1.61962  |
| H | -3.25813 | 0.13263  | 0.78895  |
| C | -2.11323 | -1.20013 | -0.47630 |
| H | -2.45227 | -0.71406 | -1.39988 |

|   |          |          |          |
|---|----------|----------|----------|
| H | -1.05855 | -1.45312 | -0.63412 |
| C | -2.89912 | -2.49623 | -0.23446 |
| H | -2.75089 | -3.16200 | -1.09647 |
| H | -2.46617 | -3.01482 | 0.63289  |
| C | -4.40754 | -2.31706 | -0.00175 |
| H | -4.85309 | -3.30666 | 0.16494  |
| H | -4.57601 | -1.75168 | 0.92414  |
| C | -5.13488 | -1.62564 | -1.15880 |
| H | -4.78786 | -0.59531 | -1.29603 |
| H | -4.96806 | -2.15937 | -2.10289 |
| H | -6.21558 | -1.58914 | -0.98086 |
| H | -2.94713 | 2.62050  | 0.26078  |

4e\_conformer-138

|   |          |          |          |
|---|----------|----------|----------|
| C | 0.24138  | -3.48556 | 0.12364  |
| C | 0.18735  | -1.22494 | 0.37462  |
| N | 0.99628  | -2.34687 | 0.25301  |
| H | 1.99816  | -2.33773 | 0.38179  |
| C | -1.08312 | -3.08482 | 0.13109  |
| C | 0.85950  | -4.84156 | 0.02137  |
| H | 1.42739  | -5.10390 | 0.92367  |
| H | 0.08008  | -5.59637 | -0.11328 |
| H | 1.54934  | -4.91354 | -0.82915 |
| C | 0.77618  | 0.10835  | 0.49473  |
| C | 0.13612  | 1.13017  | 1.21468  |
| C | 2.02077  | 0.38208  | -0.11065 |
| C | 0.72363  | 2.39235  | 1.31483  |
| H | -0.80404 | 0.93245  | 1.71469  |
| C | 2.60694  | 1.64412  | 0.00982  |
| H | 2.50060  | -0.38831 | -0.70128 |
| C | 1.95348  | 2.66011  | 0.72305  |
| H | 0.21847  | 3.17461  | 1.87443  |
| H | 2.42202  | 3.63594  | 0.79820  |
| O | 3.80596  | 1.98768  | -0.54533 |
| C | 4.51492  | 0.99230  | -1.27613 |
| H | 4.75404  | 0.12808  | -0.64467 |
| H | 3.94352  | 0.65479  | -2.14931 |
| H | 5.43898  | 1.46681  | -1.60873 |
| C | -1.13398 | -1.66925 | 0.29320  |
| C | -2.39302 | -0.84519 | 0.24580  |
| H | -3.25414 | -1.52483 | 0.28836  |
| H | -2.47861 | -0.20353 | 1.12983  |
| C | -2.50478 | 0.01348  | -1.02800 |
| H | -1.64691 | 0.69425  | -1.07807 |
| H | -2.41737 | -0.65125 | -1.89714 |



|   |          |          |          |
|---|----------|----------|----------|
| C | -3.81728 | 0.80321  | -1.13162 |
| H | -3.86558 | 1.27838  | -2.12176 |
| H | -4.65873 | 0.09697  | -1.08875 |
| C | -4.02022 | 1.88658  | -0.06034 |
| H | -5.02383 | 2.31417  | -0.18597 |
| H | -4.01091 | 1.43120  | 0.93868  |
| C | -2.98452 | 3.01411  | -0.11721 |
| H | -2.97850 | 3.48927  | -1.10645 |
| H | -3.20532 | 3.79013  | 0.62482  |
| H | -1.97241 | 2.64686  | 0.08051  |
| H | -1.93802 | -3.74094 | 0.02390  |

4e\_conformer-139

|   |          |          |          |
|---|----------|----------|----------|
| C | -0.24039 | -3.48561 | 0.12358  |
| C | -0.18703 | -1.22500 | 0.37476  |
| N | -0.99563 | -2.34716 | 0.25302  |
| H | -1.99752 | -2.33831 | 0.38173  |
| C | 1.08399  | -3.08449 | 0.13110  |
| C | -0.85811 | -4.84179 | 0.02116  |
| H | -0.07846 | -5.59636 | -0.11344 |
| H | -1.42604 | -5.10433 | 0.92337  |
| H | -1.54782 | -4.91392 | -0.82945 |
| C | -0.77626 | 0.10812  | 0.49495  |
| C | -0.13665 | 1.13000  | 1.21522  |
| C | -2.02077 | 0.38161  | -0.11070 |
| C | -0.72452 | 2.39201  | 1.31542  |
| H | 0.80342  | 0.93245  | 1.71545  |
| C | -2.60731 | 1.64347  | 0.00982  |
| H | -2.50025 | -0.38882 | -0.70156 |
| C | -1.95430 | 2.65952  | 0.72337  |
| H | -0.21973 | 3.17432  | 1.87527  |
| H | -2.42313 | 3.63522  | 0.79856  |
| O | -3.80629 | 1.98680  | -0.54556 |
| C | -4.51481 | 0.99133  | -1.27668 |
| H | -4.75385 | 0.12695  | -0.64541 |
| H | -5.43892 | 1.46565  | -1.60942 |
| H | -3.94312 | 0.65411  | -2.14977 |
| C | 1.13443  | -1.66891 | 0.29335  |
| C | 2.39322  | -0.84447 | 0.24601  |
| H | 2.47839  | -0.20252 | 1.12986  |
| H | 3.25454  | -1.52381 | 0.28896  |
| C | 2.50498  | 0.01387  | -1.02802 |
| H | 2.41804  | -0.65113 | -1.89699 |
| H | 1.64686  | 0.69431  | -1.07850 |
| C | 3.81721  | 0.80408  | -1.13152 |

|   |         |          |          |
|---|---------|----------|----------|
| H | 4.65892 | 0.09817  | -1.08826 |
| H | 3.86557 | 1.27901  | -2.12177 |
| C | 4.01947 | 1.88780  | -0.06046 |
| H | 4.01017 | 1.43266  | 0.93866  |
| H | 5.02292 | 2.31580  | -0.18602 |
| C | 2.98329 | 3.01486  | -0.11779 |
| H | 1.97131 | 2.64722  | 0.07990  |
| H | 3.20365 | 3.79118  | 0.62404  |
| H | 2.97719 | 3.48974  | -1.10718 |
| H | 1.93908 | -3.74034 | 0.02389  |

4e\_conformer-140

|   |          |          |          |
|---|----------|----------|----------|
| C | 2.70722  | -1.87410 | -0.42512 |
| C | 0.62233  | -0.96889 | -0.33056 |
| N | 1.46664  | -1.95749 | 0.15570  |
| H | 1.16603  | -2.71373 | 0.75412  |
| C | 2.66928  | -0.78834 | -1.28257 |
| C | 3.79606  | -2.84966 | -0.11894 |
| H | 4.71190  | -2.56071 | -0.64155 |
| H | 4.01838  | -2.88959 | 0.95488  |
| H | 3.53716  | -3.86863 | -0.43562 |
| C | -0.73786 | -0.83384 | 0.18633  |
| C | -1.04699 | -1.22251 | 1.50777  |
| C | -1.76732 | -0.32250 | -0.61462 |
| C | -2.34469 | -1.09478 | 1.98925  |
| H | -0.26308 | -1.59113 | 2.16187  |
| C | -3.06779 | -0.18212 | -0.11744 |
| H | -1.58034 | -0.03805 | -1.64333 |
| C | -3.36898 | -0.57346 | 1.19292  |
| H | -2.56975 | -1.39210 | 3.00979  |
| H | -4.36987 | -0.47660 | 1.59462  |
| O | -3.97753 | 0.33492  | -0.99559 |
| C | -5.32204 | 0.48293  | -0.55117 |
| H | -5.38754 | 1.16767  | 0.30298  |
| H | -5.87164 | 0.90197  | -1.39505 |
| H | -5.75995 | -0.48364 | -0.27402 |
| C | 1.36794  | -0.20901 | -1.23279 |
| C | 0.97463  | 1.06496  | -1.93283 |
| H | 1.81556  | 1.37488  | -2.56681 |
| H | 0.13638  | 0.89111  | -2.62062 |
| C | 0.60276  | 2.24391  | -1.00949 |
| H | 0.27540  | 3.07079  | -1.65399 |
| H | -0.26553 | 1.96964  | -0.39791 |
| C | 1.72916  | 2.75160  | -0.09432 |
| H | 2.65750  | 2.84919  | -0.67737 |

|   |         |          |          |
|---|---------|----------|----------|
| H | 1.47183 | 3.76947  | 0.23294  |
| C | 2.00361 | 1.90724  | 1.15818  |
| H | 1.05814 | 1.74975  | 1.69625  |
| H | 2.35987 | 0.91452  | 0.86880  |
| C | 3.02335 | 2.56653  | 2.09062  |
| H | 2.67712 | 3.55243  | 2.42593  |
| H | 3.20690 | 1.95519  | 2.98190  |
| H | 3.98517 | 2.71074  | 1.58226  |
| H | 3.49993 | -0.42782 | -1.87652 |

4e\_conformer-141

|   |          |          |          |
|---|----------|----------|----------|
| C | -2.70736 | -1.87399 | -0.42501 |
| C | -0.62242 | -0.96889 | -0.33052 |
| N | -1.46679 | -1.95738 | 0.15584  |
| H | -1.16621 | -2.71361 | 0.75430  |
| C | -2.66934 | -0.78832 | -1.28258 |
| C | -3.79625 | -2.84946 | -0.11875 |
| H | -3.53742 | -3.86846 | -0.43538 |
| H | -4.01855 | -2.88931 | 0.95507  |
| H | -4.71208 | -2.56049 | -0.64138 |
| C | 0.73775  | -0.83381 | 0.18640  |
| C | 1.04682  | -1.22219 | 1.50794  |
| C | 1.76727  | -0.32270 | -0.61464 |
| C | 2.34451  | -1.09442 | 1.98943  |
| H | 0.26286  | -1.59059 | 2.16209  |
| C | 3.06772  | -0.18227 | -0.11745 |
| H | 1.58033  | -0.03847 | -1.64342 |
| C | 3.36885  | -0.57333 | 1.19301  |
| H | 2.56952  | -1.39151 | 3.01005  |
| H | 4.36974  | -0.47644 | 1.59472  |
| O | 3.97752  | 0.33454  | -0.99568 |
| C | 5.32203  | 0.48254  | -0.55125 |
| H | 5.38756  | 1.16745  | 0.30276  |
| H | 5.75987  | -0.48401 | -0.27391 |
| H | 5.87168  | 0.90138  | -1.39521 |
| C | -1.36797 | -0.20906 | -1.23285 |
| C | -0.97458 | 1.06484  | -1.93296 |
| H | -0.13638 | 0.89089  | -2.62079 |
| H | -1.81551 | 1.37481  | -2.56691 |
| C | -0.60257 | 2.24379  | -1.00968 |
| H | 0.26574  | 1.96946  | -0.39814 |
| H | -0.27517 | 3.07063  | -1.65421 |
| C | -1.72887 | 2.75160  | -0.09445 |
| H | -1.47138 | 3.76942  | 0.23284  |
| H | -2.65721 | 2.84934  | -0.67748 |

|   |          |          |          |
|---|----------|----------|----------|
| C | -2.00342 | 1.90723  | 1.15802  |
| H | -2.35994 | 0.91460  | 0.86861  |
| H | -1.05794 | 1.74948  | 1.69599  |
| C | -3.02292 | 2.56670  | 2.09057  |
| H | -2.67642 | 3.55250  | 2.42592  |
| H | -3.98475 | 2.71118  | 1.58230  |
| H | -3.20656 | 1.95536  | 2.98183  |
| H | -3.49996 | -0.42781 | -1.87657 |

4e\_conformer-142

|   |          |          |          |
|---|----------|----------|----------|
| C | 2.92423  | -1.60159 | 0.09014  |
| C | 0.76107  | -0.90167 | 0.11458  |
| N | 1.71169  | -1.65995 | -0.55364 |
| H | 1.50009  | -2.27749 | -1.32466 |
| C | 2.75759  | -0.76007 | 1.17456  |
| C | 4.11118  | -2.37608 | -0.38190 |
| H | 3.94441  | -3.45994 | -0.32713 |
| H | 4.36543  | -2.13864 | -1.42269 |
| H | 4.97995  | -2.14052 | 0.23873  |
| C | -0.58556 | -0.74513 | -0.43780 |
| C | -0.77561 | -0.64915 | -1.82627 |
| C | -1.70849 | -0.69076 | 0.41008  |
| C | -2.06071 | -0.48931 | -2.34896 |
| H | 0.08292  | -0.66528 | -2.48994 |
| C | -2.98704 | -0.50955 | -0.12188 |
| H | -1.56641 | -0.81733 | 1.47463  |
| C | -3.16700 | -0.41091 | -1.51026 |
| H | -2.19821 | -0.41061 | -3.42378 |
| H | -4.17016 | -0.27715 | -1.90195 |
| O | -4.12468 | -0.43495 | 0.62923  |
| C | -3.99446 | -0.49902 | 2.04575  |
| H | -3.58006 | -1.46246 | 2.36639  |
| H | -3.35956 | 0.31120  | 2.42443  |
| H | -5.00368 | -0.38792 | 2.44429  |
| C | 1.40214  | -0.31201 | 1.20226  |
| C | 0.87073  | 0.74362  | 2.13166  |
| H | -0.21922 | 0.68123  | 2.20499  |
| H | 1.25815  | 0.55854  | 3.14245  |
| C | 1.23734  | 2.18916  | 1.72739  |
| H | 0.86333  | 2.85450  | 2.51674  |
| H | 2.33034  | 2.30120  | 1.72211  |
| C | 0.66450  | 2.63652  | 0.36852  |
| H | -0.31183 | 2.15659  | 0.21327  |
| H | 0.46945  | 3.71780  | 0.39718  |
| C | 1.56572  | 2.34897  | -0.83959 |

|   |          |          |          |
|---|----------|----------|----------|
| H | 2.51071  | 2.89709  | -0.71449 |
| H | 1.82562  | 1.28649  | -0.86398 |
| C | 0.90937  | 2.74559  | -2.16408 |
| H | -0.00871 | 2.16883  | -2.32759 |
| H | 0.64245  | 3.81019  | -2.17297 |
| H | 1.57602  | 2.56112  | -3.01478 |
| H | 3.53450  | -0.47996 | 1.87521  |

4e\_conformer-143

|   |          |          |          |
|---|----------|----------|----------|
| C | 2.73743  | -1.83882 | -0.32668 |
| C | 0.95627  | -0.76712 | 0.59346  |
| N | 1.37346  | -1.85470 | -0.15983 |
| H | 0.77012  | -2.61913 | -0.42874 |
| C | 3.20098  | -0.69827 | 0.30288  |
| C | 3.46093  | -2.92863 | -1.04801 |
| H | 3.36549  | -3.89547 | -0.53643 |
| H | 3.08256  | -3.06280 | -2.06934 |
| H | 4.52576  | -2.68909 | -1.11260 |
| C | -0.46874 | -0.52185 | 0.82234  |
| C | -0.94359 | -0.01520 | 2.04878  |
| C | -1.39416 | -0.79129 | -0.19474 |
| C | -2.30085 | 0.23022  | 2.22162  |
| H | -0.25004 | 0.15776  | 2.86381  |
| C | -2.76134 | -0.55219 | -0.00931 |
| H | -1.06276 | -1.15619 | -1.16152 |
| C | -3.22493 | -0.03143 | 1.20433  |
| H | -2.65910 | 0.62047  | 3.17022  |
| H | -4.27706 | 0.16688  | 1.36687  |
| O | -3.55812 | -0.84421 | -1.07933 |
| C | -4.95431 | -0.59227 | -0.95741 |
| H | -5.15312 | 0.46997  | -0.77086 |
| H | -5.39517 | -0.88238 | -1.91198 |
| H | -5.39946 | -1.19020 | -0.15307 |
| C | 2.09109  | -0.01413 | 0.88513  |
| C | 2.15654  | 1.35113  | 1.51057  |
| H | 1.29407  | 1.51633  | 2.16346  |
| H | 3.04547  | 1.40975  | 2.15278  |
| C | 2.21407  | 2.51338  | 0.49384  |
| H | 2.34217  | 3.44209  | 1.06548  |
| H | 3.11267  | 2.40901  | -0.12978 |
| C | 0.97023  | 2.63775  | -0.40756 |
| H | 0.08018  | 2.33673  | 0.16234  |
| H | 0.81909  | 3.69459  | -0.66902 |
| C | 1.03080  | 1.83133  | -1.71169 |
| H | 1.87798  | 2.19297  | -2.31218 |

|   |          |          |          |
|---|----------|----------|----------|
| H | 1.23648  | 0.78005  | -1.48939 |
| C | -0.26151 | 1.93918  | -2.52479 |
| H | -0.49061 | 2.98393  | -2.77123 |
| H | -0.19227 | 1.38125  | -3.46608 |
| H | -1.10958 | 1.53523  | -1.95918 |
| H | 4.23451  | -0.37600 | 0.33347  |

4e\_conformer-144

|   |          |          |          |
|---|----------|----------|----------|
| C | 0.98203  | 2.42845  | -0.12095 |
| C | -0.17901 | 0.47616  | -0.00891 |
| N | -0.23125 | 1.82393  | -0.33794 |
| H | -1.01738 | 2.26630  | -0.79202 |
| C | 1.82540  | 1.45736  | 0.38709  |
| C | 1.21754  | 3.87015  | -0.43270 |
| H | 1.10006  | 4.08319  | -1.50333 |
| H | 0.52120  | 4.52444  | 0.10718  |
| H | 2.23443  | 4.15144  | -0.14611 |
| C | -1.37230 | -0.36322 | -0.10658 |
| C | -1.28647 | -1.73572 | -0.39171 |
| C | -2.64734 | 0.21197  | 0.08351  |
| C | -2.44595 | -2.50958 | -0.47155 |
| H | -0.32193 | -2.18945 | -0.58187 |
| C | -3.80062 | -0.56827 | -0.01704 |
| H | -2.71914 | 1.26063  | 0.34389  |
| C | -3.70171 | -1.94098 | -0.29093 |
| H | -2.36742 | -3.57011 | -0.69419 |
| H | -4.61005 | -2.53087 | -0.35829 |
| O | -5.06790 | -0.08853 | 0.15110  |
| C | -5.22705 | 1.30027  | 0.42130  |
| H | -4.81630 | 1.91401  | -0.38951 |
| H | -6.30198 | 1.46913  | 0.49684  |
| H | -4.74649 | 1.58137  | 1.36624  |
| C | 1.11102  | 0.22270  | 0.46035  |
| C | 1.65369  | -1.07207 | 0.99855  |
| H | 2.29108  | -0.85909 | 1.86565  |
| H | 0.82934  | -1.69069 | 1.37165  |
| C | 2.46272  | -1.90312 | -0.02256 |
| H | 2.76385  | -2.84427 | 0.45882  |
| H | 1.80519  | -2.17725 | -0.85797 |
| C | 3.70547  | -1.20512 | -0.59008 |
| H | 4.14109  | -1.84419 | -1.37093 |
| H | 3.40293  | -0.27433 | -1.08750 |
| C | 4.78848  | -0.89286 | 0.44836  |
| H | 4.38112  | -0.23759 | 1.22873  |
| H | 5.08289  | -1.82301 | 0.95500  |

|   |         |          |          |
|---|---------|----------|----------|
| C | 6.02132 | -0.22911 | -0.17022 |
| H | 5.75430 | 0.71954  | -0.65226 |
| H | 6.78651 | -0.01688 | 0.58513  |
| H | 6.47368 | -0.87247 | -0.93497 |
| H | 2.85157 | 1.61881  | 0.69111  |

4e\_conformer-145

|   |          |          |          |
|---|----------|----------|----------|
| C | -2.89011 | -1.44328 | -0.73125 |
| C | -0.72663 | -0.81473 | -0.41133 |
| N | -1.67961 | -1.80105 | -0.19370 |
| H | -1.47236 | -2.71281 | 0.18815  |
| C | -2.72096 | -0.18554 | -1.28257 |
| C | -4.08154 | -2.34233 | -0.67664 |
| H | -3.91163 | -3.28323 | -1.21629 |
| H | -4.34945 | -2.60318 | 0.35511  |
| H | -4.94277 | -1.84661 | -1.13251 |
| C | 0.63453  | -0.97470 | 0.09558  |
| C | 0.89380  | -1.76641 | 1.22843  |
| C | 1.71559  | -0.34070 | -0.54828 |
| C | 2.19952  | -1.91490 | 1.69905  |
| H | 0.07411  | -2.23535 | 1.76350  |
| C | 3.01438  | -0.47935 | -0.05675 |
| H | 1.52724  | 0.24180  | -1.43848 |
| C | 3.26325  | -1.27629 | 1.07109  |
| H | 2.38650  | -2.52555 | 2.57796  |
| H | 4.28135  | -1.37373 | 1.43365  |
| O | 4.10933  | 0.11376  | -0.61727 |
| C | 3.90344  | 0.97071  | -1.73577 |
| H | 3.49317  | 0.42077  | -2.59136 |
| H | 3.23101  | 1.79978  | -1.48384 |
| H | 4.88670  | 1.36471  | -1.99600 |
| C | -1.36963 | 0.22461  | -1.08764 |
| C | -0.82678 | 1.57510  | -1.47842 |
| H | -0.01224 | 1.46611  | -2.20731 |
| H | -1.62044 | 2.11637  | -2.00990 |
| C | -0.32224 | 2.46520  | -0.32319 |
| H | 0.44084  | 1.92679  | 0.24938  |
| H | 0.19010  | 3.32566  | -0.77445 |
| C | -1.41132 | 3.00433  | 0.61938  |
| H | -0.97448 | 3.82382  | 1.20862  |
| H | -2.20669 | 3.45923  | 0.01122  |
| C | -2.04389 | 2.00066  | 1.59801  |
| H | -2.82579 | 2.52755  | 2.16280  |
| H | -2.54654 | 1.20300  | 1.04229  |
| C | -1.04737 | 1.38533  | 2.58464  |

|   |          |         |          |
|---|----------|---------|----------|
| H | -1.55891 | 0.73811 | 3.30691  |
| H | -0.29698 | 0.77534 | 2.07304  |
| H | -0.51941 | 2.16422 | 3.15025  |
| H | -3.49512 | 0.39832 | -1.76472 |

4e\_conformer-146

|   |          |          |          |
|---|----------|----------|----------|
| C | 1.67363  | 2.49431  | 0.03984  |
| C | 0.29270  | 0.70478  | 0.28895  |
| N | 0.42746  | 1.98604  | -0.23075 |
| H | -0.25210 | 2.42407  | -0.83601 |
| C | 2.34384  | 1.53497  | 0.77626  |
| C | 2.10379  | 3.84082  | -0.44282 |
| H | 1.44198  | 4.63697  | -0.07870 |
| H | 3.11583  | 4.05675  | -0.09004 |
| H | 2.11117  | 3.90001  | -1.53906 |
| C | -0.96566 | -0.02656 | 0.13541  |
| C | -0.99515 | -1.42763 | -0.02452 |
| C | -2.18303 | 0.67027  | 0.12199  |
| C | -2.20943 | -2.08724 | -0.17695 |
| H | -0.06930 | -1.98703 | -0.05943 |
| C | -3.40022 | 0.00050  | -0.04879 |
| H | -2.20992 | 1.74508  | 0.27196  |
| C | -3.42237 | -1.39177 | -0.19392 |
| H | -2.21953 | -3.16649 | -0.30227 |
| H | -4.35299 | -1.93083 | -0.32079 |
| O | -4.51192 | 0.79371  | -0.04510 |
| C | -5.77985 | 0.16313  | -0.19511 |
| H | -5.85422 | -0.36081 | -1.15560 |
| H | -5.97199 | -0.54571 | 0.61931  |
| H | -6.51857 | 0.96492  | -0.16075 |
| C | 1.48942  | 0.40183  | 0.93598  |
| C | 1.83533  | -0.82224 | 1.73930  |
| H | 2.08050  | -0.50465 | 2.76297  |
| H | 0.96175  | -1.47671 | 1.82988  |
| C | 3.03542  | -1.63898 | 1.21448  |
| H | 3.89226  | -0.96783 | 1.07480  |
| H | 3.32853  | -2.34039 | 2.00692  |
| C | 2.79421  | -2.45464 | -0.06613 |
| H | 3.64715  | -3.13616 | -0.19778 |
| H | 1.91820  | -3.10110 | 0.08982  |
| C | 2.61040  | -1.66608 | -1.37353 |
| H | 2.42880  | -2.38925 | -2.18056 |
| H | 1.71563  | -1.03870 | -1.31223 |
| C | 3.81113  | -0.79161 | -1.74497 |
| H | 4.73719  | -1.38032 | -1.77261 |



|   |         |          |          |
|---|---------|----------|----------|
| H | 3.67423 | -0.33766 | -2.73342 |
| H | 3.94736 | 0.02190  | -1.02555 |
| H | 3.34622 | 1.63870  | 1.17227  |

4e\_conformer-147

|   |          |          |          |
|---|----------|----------|----------|
| C | -1.67364 | 2.49431  | 0.03984  |
| C | -0.29270 | 0.70478  | 0.28896  |
| N | -0.42746 | 1.98603  | -0.23075 |
| H | 0.25210  | 2.42407  | -0.83600 |
| C | -2.34384 | 1.53497  | 0.77626  |
| C | -2.10378 | 3.84082  | -0.44282 |
| H | -1.44198 | 4.63697  | -0.07870 |
| H | -2.11117 | 3.90001  | -1.53906 |
| H | -3.11583 | 4.05675  | -0.09004 |
| C | 0.96566  | -0.02656 | 0.13542  |
| C | 0.99515  | -1.42764 | -0.02450 |
| C | 2.18303  | 0.67027  | 0.12199  |
| C | 2.20943  | -2.08724 | -0.17693 |
| H | 0.06930  | -1.98704 | -0.05940 |
| C | 3.40022  | 0.00050  | -0.04879 |
| H | 2.20991  | 1.74509  | 0.27195  |
| C | 3.42237  | -1.39177 | -0.19390 |
| H | 2.21953  | -3.16649 | -0.30224 |
| H | 4.35299  | -1.93083 | -0.32078 |
| O | 4.51191  | 0.79371  | -0.04510 |
| C | 5.77984  | 0.16314  | -0.19512 |
| H | 5.85421  | -0.36081 | -1.15561 |
| H | 6.51856  | 0.96493  | -0.16077 |
| H | 5.97199  | -0.54570 | 0.61930  |
| C | -1.48942 | 0.40183  | 0.93599  |
| C | -1.83534 | -0.82223 | 1.73930  |
| H | -0.96176 | -1.47671 | 1.82990  |
| H | -2.08052 | -0.50465 | 2.76297  |
| C | -3.03543 | -1.63898 | 1.21447  |
| H | -3.32855 | -2.34039 | 2.00691  |
| H | -3.89226 | -0.96782 | 1.07477  |
| C | -2.79420 | -2.45464 | -0.06614 |
| H | -1.91820 | -3.10110 | 0.08982  |
| H | -3.64714 | -3.13616 | -0.19780 |
| C | -2.61038 | -1.66608 | -1.37353 |
| H | -1.71561 | -1.03870 | -1.31223 |
| H | -2.42877 | -2.38925 | -2.18056 |
| C | -3.81110 | -0.79161 | -1.74499 |
| H | -3.94734 | 0.02190  | -1.02557 |
| H | -3.67419 | -0.33766 | -2.73344 |

|   |          |          |          |
|---|----------|----------|----------|
| H | -4.73716 | -1.38032 | -1.77264 |
| H | -3.34622 | 1.63871  | 1.17227  |

4e\_conformer-148

|   |          |          |          |
|---|----------|----------|----------|
| C | 0.36969  | 3.26553  | 0.13143  |
| C | -0.29504 | 1.09753  | 0.26704  |
| N | -0.70908 | 2.42103  | 0.21438  |
| H | -1.66468 | 2.72115  | 0.34396  |
| C | 1.50035  | 2.46883  | 0.10036  |
| C | 0.21479  | 4.75099  | 0.09760  |
| H | -0.39364 | 5.07983  | -0.75464 |
| H | -0.26560 | 5.13484  | 1.00709  |
| H | 1.19612  | 5.22547  | 0.01261  |
| C | -1.26606 | 0.00827  | 0.34883  |
| C | -0.97169 | -1.18345 | 1.04401  |
| C | -2.52619 | 0.13510  | -0.25404 |
| C | -1.91359 | -2.20404 | 1.10816  |
| H | -0.02166 | -1.28892 | 1.55455  |
| C | -3.47488 | -0.89041 | -0.17027 |
| H | -2.78352 | 1.02208  | -0.82456 |
| C | -3.17084 | -2.07624 | 0.50938  |
| H | -1.67816 | -3.11706 | 1.64812  |
| H | -3.88780 | -2.88477 | 0.58006  |
| O | -4.66275 | -0.64385 | -0.79767 |
| C | -5.65741 | -1.66226 | -0.76365 |
| H | -5.96469 | -1.88646 | 0.26491  |
| H | -6.50909 | -1.26719 | -1.31891 |
| H | -5.30335 | -2.58240 | -1.24393 |
| C | 1.09726  | 1.10125  | 0.18460  |
| C | 2.00489  | -0.09832 | 0.12168  |
| H | 2.39413  | -0.33166 | 1.12318  |
| H | 1.42568  | -0.97858 | -0.18343 |
| C | 3.18503  | 0.07422  | -0.84824 |
| H | 2.79185  | 0.38200  | -1.82580 |
| H | 3.82908  | 0.89457  | -0.50358 |
| C | 4.03286  | -1.19285 | -1.01984 |
| H | 3.39326  | -2.01121 | -1.38264 |
| H | 4.77817  | -1.01552 | -1.80798 |
| C | 4.76137  | -1.64911 | 0.24986  |
| H | 5.36082  | -0.81398 | 0.63972  |
| H | 4.03158  | -1.89360 | 1.03214  |
| C | 5.66472  | -2.86102 | 0.00732  |
| H | 6.17546  | -3.17244 | 0.92561  |
| H | 5.08403  | -3.71655 | -0.35924 |
| H | 6.43187  | -2.63616 | -0.74390 |

|   |         |         |         |
|---|---------|---------|---------|
| H | 2.51426 | 2.83609 | 0.01192 |
|---|---------|---------|---------|

4e\_conformer-149

|   |          |          |          |
|---|----------|----------|----------|
| C | -0.36972 | 3.26552  | 0.13141  |
| C | 0.29503  | 1.09753  | 0.26709  |
| N | 0.70906  | 2.42103  | 0.21437  |
| H | 1.66466  | 2.72117  | 0.34392  |
| C | -1.50037 | 2.46881  | 0.10039  |
| C | -0.21483 | 4.75098  | 0.09753  |
| H | -1.19617 | 5.22545  | 0.01254  |
| H | 0.26558  | 5.13487  | 1.00700  |
| H | 0.39358  | 5.07980  | -0.75473 |
| C | 1.26607  | 0.00829  | 0.34889  |
| C | 0.97175  | -1.18340 | 1.04417  |
| C | 2.52615  | 0.13509  | -0.25407 |
| C | 1.91367  | -2.20397 | 1.10833  |
| H | 0.02176  | -1.28883 | 1.55477  |
| C | 3.47487  | -0.89040 | -0.17029 |
| H | 2.78344  | 1.02204  | -0.82466 |
| C | 3.17089  | -2.07619 | 0.50946  |
| H | 1.67829  | -3.11695 | 1.64837  |
| H | 3.88786  | -2.88471 | 0.58015  |
| O | 4.66270  | -0.64387 | -0.79778 |
| C | 5.65736  | -1.66227 | -0.76375 |
| H | 6.50901  | -1.26721 | -1.31909 |
| H | 5.96471  | -1.88640 | 0.26480  |
| H | 5.30328  | -2.58244 | -1.24396 |
| C | -1.09727 | 1.10124  | 0.18467  |
| C | -2.00490 | -0.09834 | 0.12178  |
| H | -1.42565 | -0.97865 | -0.18309 |
| H | -2.39431 | -0.33151 | 1.12326  |
| C | -3.18488 | 0.07407  | -0.84835 |
| H | -3.82896 | 0.89451  | -0.50393 |
| H | -2.79153 | 0.38168  | -1.82590 |
| C | -4.03271 | -1.19300 | -1.01988 |
| H | -4.77789 | -1.01578 | -1.80818 |
| H | -3.39308 | -2.01145 | -1.38243 |
| C | -4.76146 | -1.64900 | 0.24978  |
| H | -4.03182 | -1.89338 | 1.03223  |
| H | -5.36096 | -0.81379 | 0.63938  |
| C | -5.66481 | -2.86094 | 0.00731  |
| H | -5.08407 | -3.71656 | -0.35900 |
| H | -6.17572 | -3.17218 | 0.92555  |
| H | -6.43182 | -2.63619 | -0.74410 |
| H | -2.51429 | 2.83606  | 0.01196  |

## 4e\_conformer-150

|   |          |          |          |
|---|----------|----------|----------|
| C | 1.16086  | 2.74202  | -0.31704 |
| C | 0.04407  | 0.78644  | -0.64294 |
| N | -0.06302 | 2.12275  | -0.28061 |
| H | -0.94142 | 2.60213  | -0.14269 |
| C | 2.08128  | 1.77553  | -0.68203 |
| C | 1.32671  | 4.19478  | -0.01235 |
| H | 2.38363  | 4.46848  | -0.07014 |
| H | 0.77712  | 4.82890  | -0.72032 |
| H | 0.96810  | 4.44516  | 0.99424  |
| C | -1.13643 | -0.07633 | -0.65604 |
| C | -1.24310 | -1.15598 | -1.54769 |
| C | -2.20285 | 0.18006  | 0.23108  |
| C | -2.38340 | -1.96033 | -1.54196 |
| H | -0.44716 | -1.35102 | -2.25651 |
| C | -3.34611 | -0.62201 | 0.21697  |
| H | -2.11009 | 0.98566  | 0.94874  |
| C | -3.43787 | -1.70333 | -0.67188 |
| H | -2.45559 | -2.79274 | -2.23645 |
| H | -4.33151 | -2.31883 | -0.66152 |
| O | -4.41899 | -0.44085 | 1.04200  |
| C | -4.37999 | 0.64559  | 1.96137  |
| H | -4.28414 | 1.60604  | 1.44061  |
| H | -5.32841 | 0.61654  | 2.49928  |
| H | -3.55326 | 0.53685  | 2.67380  |
| C | 1.39612  | 0.54295  | -0.89386 |
| C | 2.07284  | -0.76475 | -1.21426 |
| H | 1.72102  | -1.16972 | -2.17196 |
| H | 3.14111  | -0.56364 | -1.35771 |
| C | 1.90168  | -1.85207 | -0.13360 |
| H | 0.84948  | -2.15672 | -0.09787 |
| H | 2.46773  | -2.73958 | -0.44466 |
| C | 2.33204  | -1.42091 | 1.27544  |
| H | 1.67030  | -0.61339 | 1.61332  |
| H | 2.16923  | -2.26399 | 1.96186  |
| C | 3.78875  | -0.95091 | 1.40128  |
| H | 3.93238  | -0.04027 | 0.80624  |
| H | 3.97066  | -0.66047 | 2.44469  |
| C | 4.82147  | -2.00276 | 0.98561  |
| H | 4.68804  | -2.93148 | 1.55474  |
| H | 4.73841  | -2.25305 | -0.07802 |
| H | 5.84277  | -1.64616 | 1.16165  |
| H | 3.14831  | 1.93093  | -0.78159 |

## 4e\_conformer-151

|   |          |          |          |
|---|----------|----------|----------|
| C | -1.16085 | 2.74190  | -0.31723 |
| C | -0.04414 | 0.78626  | -0.64292 |
| N | 0.06300  | 2.12260  | -0.28072 |
| H | 0.94139  | 2.60196  | -0.14278 |
| C | -2.08130 | 1.77542  | -0.68218 |
| C | -1.32667 | 4.19469  | -0.01264 |
| H | -0.96827 | 4.44509  | 0.99402  |
| H | -0.77687 | 4.82873  | -0.72052 |
| H | -2.38356 | 4.46847  | -0.07069 |
| C | 1.13632  | -0.07656 | -0.65587 |
| C | 1.24275  | -1.15662 | -1.54705 |
| C | 2.20294  | 0.18018  | 0.23091  |
| C | 2.38302  | -1.96103 | -1.54120 |
| H | 0.44666  | -1.35196 | -2.25561 |
| C | 3.34616  | -0.62196 | 0.21692  |
| H | 2.11038  | 0.98608  | 0.94825  |
| C | 3.43769  | -1.70368 | -0.67147 |
| H | 2.45502  | -2.79375 | -2.23532 |
| H | 4.33131  | -2.31921 | -0.66102 |
| O | 4.41922  | -0.44048 | 1.04165  |
| C | 4.38045  | 0.64636  | 1.96056  |
| H | 3.55384  | 0.53799  | 2.67318  |
| H | 5.32896  | 0.61747  | 2.49832  |
| H | 4.28458  | 1.60659  | 1.43940  |
| C | -1.39619 | 0.54280  | -0.89389 |
| C | -2.07297 | -0.76486 | -1.21427 |
| H | -3.14123 | -0.56371 | -1.35769 |
| H | -1.72121 | -1.16983 | -2.17201 |
| C | -1.90183 | -1.85221 | -0.13364 |
| H | -2.46809 | -2.73962 | -0.44460 |
| H | -0.84968 | -2.15706 | -0.09806 |
| C | -2.33189 | -1.42095 | 1.27546  |
| H | -2.16925 | -2.26409 | 1.96185  |
| H | -1.66987 | -0.61363 | 1.61327  |
| C | -3.78844 | -0.95051 | 1.40148  |
| H | -3.97016 | -0.66006 | 2.44492  |
| H | -3.93185 | -0.03980 | 0.80649  |
| C | -4.82153 | -2.00202 | 0.98587  |
| H | -5.84270 | -1.64511 | 1.16202  |
| H | -4.73865 | -2.25231 | -0.07778 |
| H | -4.68833 | -2.93080 | 1.55496  |
| H | -3.14832 | 1.93085  | -0.78180 |

## 4e\_conformer-152

|   |          |          |          |
|---|----------|----------|----------|
| C | -2.99849 | -1.62295 | -0.10065 |
| C | -0.84872 | -0.89623 | -0.24076 |
| N | -1.73697 | -1.72033 | 0.43556  |
| H | -1.45947 | -2.39966 | 1.12987  |
| C | -2.92612 | -0.69030 | -1.11885 |
| C | -4.13814 | -2.45023 | 0.39765  |
| H | -3.96891 | -3.52332 | 0.23824  |
| H | -4.30930 | -2.30433 | 1.47175  |
| H | -5.05578 | -2.17541 | -0.12945 |
| C | 0.53861  | -0.77246 | 0.21024  |
| C | 0.84102  | -0.79090 | 1.58827  |
| C | 1.59070  | -0.63705 | -0.70348 |
| C | 2.15764  | -0.66230 | 2.01623  |
| H | 0.03833  | -0.87345 | 2.31405  |
| C | 2.91222  | -0.49025 | -0.26453 |
| H | 1.40390  | -0.66487 | -1.77090 |
| C | 3.20605  | -0.50421 | 1.10444  |
| H | 2.38035  | -0.67112 | 3.07962  |
| H | 4.22216  | -0.39798 | 1.46349  |
| O | 3.84612  | -0.35756 | -1.25204 |
| C | 5.21024  | -0.22645 | -0.86541 |
| H | 5.36791  | 0.67103  | -0.25527 |
| H | 5.55416  | -1.10686 | -0.30922 |
| H | 5.77697  | -0.13869 | -1.79324 |
| C | -1.58006 | -0.22424 | -1.21747 |
| C | -1.13000 | 0.91511  | -2.08859 |
| H | -0.04693 | 0.87914  | -2.23956 |
| H | -1.58372 | 0.80901  | -3.08306 |
| C | -1.48775 | 2.31312  | -1.53627 |
| H | -1.17502 | 3.05187  | -2.28596 |
| H | -2.57934 | 2.40410  | -1.45054 |
| C | -0.83253 | 2.64930  | -0.18255 |
| H | 0.15696  | 2.17369  | -0.13338 |
| H | -0.65138 | 3.73195  | -0.12732 |
| C | -1.64991 | 2.24137  | 1.05042  |
| H | -2.60461 | 2.78681  | 1.03836  |
| H | -1.90116 | 1.17804  | 0.99401  |
| C | -0.90975 | 2.52341  | 2.36002  |
| H | 0.02092  | 1.94567  | 2.40938  |
| H | -0.64929 | 3.58590  | 2.44925  |
| H | -1.51732 | 2.25388  | 3.23199  |
| H | -3.75966 | -0.36108 | -1.72695 |

4e\_conformer-153

|   |          |          |          |
|---|----------|----------|----------|
| C | 0.15042  | 3.23226  | -0.25501 |
| C | 0.37065  | 0.98502  | 0.01503  |
| N | 0.97743  | 2.15051  | -0.43384 |
| H | 1.85146  | 2.17623  | -0.93923 |
| C | -1.00008 | 2.75891  | 0.34934  |
| C | 0.53961  | 4.60832  | -0.68671 |
| H | 1.46632  | 4.94232  | -0.20277 |
| H | 0.69933  | 4.66867  | -1.77124 |
| H | -0.25045 | 5.31752  | -0.42561 |
| C | 1.07010  | -0.29739 | -0.04225 |
| C | 0.37488  | -1.50604 | -0.21329 |
| C | 2.47677  | -0.33237 | 0.06697  |
| C | 1.07182  | -2.71495 | -0.26019 |
| H | -0.70044 | -1.49918 | -0.34198 |
| C | 3.16404  | -1.54577 | -0.00025 |
| H | 3.01504  | 0.59168  | 0.23820  |
| C | 2.45813  | -2.74810 | -0.15913 |
| H | 0.52419  | -3.64371 | -0.39430 |
| H | 3.01089  | -3.68095 | -0.20218 |
| O | 4.52100  | -1.66454 | 0.09450  |
| C | 5.28747  | -0.47446 | 0.24748  |
| H | 5.03543  | 0.04637  | 1.17917  |
| H | 6.33032  | -0.79237 | 0.28046  |
| H | 5.13934  | 0.20714  | -0.59888 |
| C | -0.87537 | 1.34846  | 0.52573  |
| C | -1.89932 | 0.45865  | 1.17017  |
| H | -1.41687 | -0.44316 | 1.56653  |
| H | -2.34071 | 0.97717  | 2.03226  |
| C | -3.03612 | 0.04324  | 0.21849  |
| H | -3.55295 | 0.94513  | -0.13838 |
| H | -2.60135 | -0.42768 | -0.67211 |
| C | -4.04356 | -0.90182 | 0.87920  |
| H | -3.52008 | -1.81157 | 1.20949  |
| H | -4.43164 | -0.42446 | 1.79000  |
| C | -5.22269 | -1.29779 | -0.02065 |
| H | -5.94125 | -1.87786 | 0.57342  |
| H | -5.75247 | -0.38971 | -0.34159 |
| C | -4.81808 | -2.11526 | -1.25191 |
| H | -4.17178 | -1.54225 | -1.92571 |
| H | -4.27107 | -3.01991 | -0.95763 |
| H | -5.69815 | -2.42796 | -1.82520 |
| H | -1.84508 | 3.36586  | 0.64993  |

4e\_conformer-154

|   |         |          |          |
|---|---------|----------|----------|
| C | 2.60131 | -1.88400 | -0.03978 |
|---|---------|----------|----------|

|   |          |          |          |
|---|----------|----------|----------|
| C | 0.89106  | -0.61670 | 0.75866  |
| N | 1.25029  | -1.83924 | 0.20945  |
| H | 0.62646  | -2.63074 | 0.13781  |
| C | 3.11287  | -0.65157 | 0.32247  |
| C | 3.26892  | -3.10861 | -0.57462 |
| H | 3.19931  | -3.95390 | 0.12270  |
| H | 2.82490  | -3.43347 | -1.52418 |
| H | 4.32918  | -2.90776 | -0.75046 |
| C | -0.51460 | -0.29759 | 1.01653  |
| C | -0.90931 | 0.42791  | 2.15071  |
| C | -1.49655 | -0.72144 | 0.09884  |
| C | -2.25595 | 0.74059  | 2.34613  |
| H | -0.16868 | 0.72338  | 2.88531  |
| C | -2.84223 | -0.41142 | 0.30900  |
| H | -1.18501 | -1.25323 | -0.79132 |
| C | -3.22553 | 0.32823  | 1.43777  |
| H | -2.55477 | 1.30321  | 3.22619  |
| H | -4.27525 | 0.56382  | 1.58017  |
| O | -3.85173 | -0.77040 | -0.53731 |
| C | -3.51040 | -1.50333 | -1.70975 |
| H | -3.03843 | -2.46092 | -1.45884 |
| H | -4.45037 | -1.68709 | -2.23161 |
| H | -2.83871 | -0.92804 | -2.35821 |
| C | 2.04761  | 0.15590  | 0.82511  |
| C | 2.16265  | 1.61450  | 1.16939  |
| H | 1.34739  | 1.91717  | 1.83383  |
| H | 3.09327  | 1.77729  | 1.72932  |
| C | 2.16027  | 2.56154  | -0.05157 |
| H | 2.35502  | 3.57562  | 0.32187  |
| H | 3.00202  | 2.30943  | -0.71129 |
| C | 0.84953  | 2.56526  | -0.86215 |
| H | 0.00164  | 2.42690  | -0.17674 |
| H | 0.71257  | 3.55662  | -1.31675 |
| C | 0.76880  | 1.51774  | -1.98053 |
| H | 1.58289  | 1.69953  | -2.69685 |
| H | 0.93780  | 0.51889  | -1.56782 |
| C | -0.57660 | 1.54929  | -2.70983 |
| H | -0.76376 | 2.53307  | -3.15892 |
| H | -0.61788 | 0.80236  | -3.51160 |
| H | -1.39765 | 1.33864  | -2.01429 |
| H | 4.14875  | -0.35057 | 0.22582  |

4e\_conformer-155

|   |          |          |          |
|---|----------|----------|----------|
| C | -2.60117 | -1.88407 | -0.03975 |
| C | -0.89092 | -0.61677 | 0.75870  |



|   |          |          |          |
|---|----------|----------|----------|
| N | -1.25014 | -1.83928 | 0.20943  |
| H | -0.62627 | -2.63074 | 0.13767  |
| C | -3.11275 | -0.65168 | 0.32262  |
| C | -3.26875 | -3.10866 | -0.57464 |
| H | -3.19913 | -3.95399 | 0.12263  |
| H | -4.32902 | -2.90783 | -0.75047 |
| H | -2.82473 | -3.43347 | -1.52422 |
| C | 0.51474  | -0.29763 | 1.01654  |
| C | 0.90948  | 0.42776  | 2.15078  |
| C | 1.49666  | -0.72135 | 0.09876  |
| C | 2.25612  | 0.74047  | 2.34618  |
| H | 0.16887  | 0.72313  | 2.88544  |
| C | 2.84234  | -0.41130 | 0.30889  |
| H | 1.18510  | -1.25305 | -0.79144 |
| C | 3.22567  | 0.32823  | 1.43773  |
| H | 2.55496  | 1.30300  | 3.22628  |
| H | 4.27539  | 0.56385  | 1.58011  |
| O | 3.85182  | -0.77015 | -0.53750 |
| C | 3.51044  | -1.50290 | -1.71005 |
| H | 2.83870  | -0.92753 | -2.35838 |
| H | 4.45039  | -1.68657 | -2.23198 |
| H | 3.03850  | -2.46055 | -1.45926 |
| C | -2.04749 | 0.15579  | 0.82526  |
| C | -2.16257 | 1.61437  | 1.16964  |
| H | -3.09310 | 1.77709  | 1.72973  |
| H | -1.34720 | 1.91705  | 1.83394  |
| C | -2.16044 | 2.56146  | -0.05129 |
| H | -3.00230 | 2.30934  | -0.71087 |
| H | -2.35515 | 3.57551  | 0.32221  |
| C | -0.84984 | 2.56522  | -0.86211 |
| H | -0.71300 | 3.55660  | -1.31673 |
| H | -0.00183 | 2.42688  | -0.17685 |
| C | -0.76929 | 1.51771  | -1.98051 |
| H | -0.93822 | 0.51887  | -1.56776 |
| H | -1.58351 | 1.69949  | -2.69668 |
| C | 0.57598  | 1.54927  | -2.71005 |
| H | 1.39716  | 1.33864  | -2.01466 |
| H | 0.61713  | 0.80235  | -3.51183 |
| H | 0.76304  | 2.53306  | -3.15917 |
| H | -4.14864 | -0.35070 | 0.22604  |

4e\_conformer-156

|   |         |         |          |
|---|---------|---------|----------|
| C | 1.11673 | 3.34578 | -0.12062 |
| C | 0.54655 | 1.15379 | -0.34234 |
| N | 1.59062 | 2.06422 | -0.24486 |

|   |          |          |          |
|---|----------|----------|----------|
| H | 2.56253  | 1.82754  | -0.38412 |
| C | -0.26428 | 3.25748  | -0.10852 |
| C | 2.02877  | 4.52592  | -0.03947 |
| H | 1.44330  | 5.44043  | 0.08783  |
| H | 2.72285  | 4.44906  | 0.80721  |
| H | 2.63520  | 4.63987  | -0.94757 |
| C | 0.81408  | -0.27974 | -0.45114 |
| C | -0.08492 | -1.14816 | -1.09276 |
| C | 2.00106  | -0.81595 | 0.09251  |
| C | 0.19461  | -2.51262 | -1.17669 |
| H | -0.98916 | -0.75753 | -1.54168 |
| C | 2.27814  | -2.18068 | -0.01239 |
| H | 2.68008  | -0.16339 | 0.62702  |
| C | 1.36800  | -3.03899 | -0.64694 |
| H | -0.50980 | -3.17298 | -1.67492 |
| H | 1.59822  | -4.09752 | -0.71001 |
| O | 3.40189  | -2.77452 | 0.48707  |
| C | 4.36377  | -1.94893 | 1.13521  |
| H | 5.17578  | -2.61328 | 1.43354  |
| H | 4.75132  | -1.17941 | 0.45662  |
| H | 3.94187  | -1.46650 | 2.02523  |
| C | -0.63808 | 1.88978  | -0.25214 |
| C | -2.05145 | 1.37399  | -0.20411 |
| H | -2.73620 | 2.23173  | -0.20186 |
| H | -2.29110 | 0.80979  | -1.11277 |
| C | -2.34196 | 0.50736  | 1.03597  |
| H | -1.59291 | -0.29127 | 1.10123  |
| H | -2.20693 | 1.13197  | 1.92844  |
| C | -3.74322 | -0.11684 | 1.04638  |
| H | -3.93026 | -0.55334 | 2.03761  |
| H | -4.50021 | 0.67016  | 0.91143  |
| C | -3.94901 | -1.20727 | -0.01277 |
| H | -3.81939 | -0.78389 | -1.01717 |
| H | -3.16380 | -1.96786 | 0.10099  |
| C | -5.32613 | -1.86912 | 0.07899  |
| H | -6.12664 | -1.13185 | -0.05922 |
| H | -5.45104 | -2.64541 | -0.68450 |
| H | -5.47340 | -2.33677 | 1.06034  |
| H | -0.94579 | 4.09222  | -0.00113 |

#### 4e\_conformer-157

|   |          |         |          |
|---|----------|---------|----------|
| C | -0.86971 | 3.43265 | -0.36740 |
| C | -1.07928 | 1.19104 | -0.06458 |
| N | -1.75317 | 2.39632 | -0.20067 |
| H | -2.75633 | 2.47928 | -0.28201 |

|   |          |          |          |
|---|----------|----------|----------|
| C | 0.40155  | 2.88832  | -0.31071 |
| C | -1.32520 | 4.84065  | -0.57130 |
| H | -0.45942 | 5.50189  | -0.66354 |
| H | -1.92886 | 4.94950  | -1.48181 |
| H | -1.93535 | 5.19909  | 0.26769  |
| C | -1.80337 | -0.05960 | 0.14504  |
| C | -3.05559 | -0.07246 | 0.78500  |
| C | -1.25758 | -1.28010 | -0.30184 |
| C | -3.73662 | -1.27605 | 0.97133  |
| H | -3.48172 | 0.85100  | 1.16481  |
| C | -1.93863 | -2.48063 | -0.09033 |
| H | -0.31859 | -1.27086 | -0.83629 |
| C | -3.18895 | -2.48204 | 0.54555  |
| H | -4.70219 | -1.27474 | 1.46944  |
| H | -3.70416 | -3.42554 | 0.69365  |
| O | -1.47013 | -3.70201 | -0.48300 |
| C | -0.18984 | -3.75696 | -1.10407 |
| H | 0.59050  | -3.35649 | -0.44544 |
| H | 0.00351  | -4.81273 | -1.29827 |
| H | -0.18036 | -3.20454 | -2.05146 |
| C | 0.28584  | 1.47854  | -0.12110 |
| C | 1.42231  | 0.50390  | 0.04539  |
| H | 1.10318  | -0.32047 | 0.69694  |
| H | 1.66439  | 0.03678  | -0.92026 |
| C | 2.69883  | 1.12743  | 0.62825  |
| H | 3.10104  | 1.86899  | -0.07543 |
| H | 2.43807  | 1.67865  | 1.54093  |
| C | 3.78911  | 0.09835  | 0.95385  |
| H | 4.62711  | 0.61403  | 1.44355  |
| H | 3.40026  | -0.62074 | 1.69008  |
| C | 4.32623  | -0.66832 | -0.26060 |
| H | 3.51779  | -1.24875 | -0.72332 |
| H | 4.66144  | 0.05143  | -1.02113 |
| C | 5.47832  | -1.60969 | 0.09990  |
| H | 6.32072  | -1.05430 | 0.53035  |
| H | 5.16018  | -2.35391 | 0.84047  |
| H | 5.84683  | -2.14970 | -0.77968 |
| H | 1.32075  | 3.45381  | -0.38479 |

#### 4e\_conformer-158

|   |          |         |          |
|---|----------|---------|----------|
| C | 0.86992  | 3.43261 | -0.36740 |
| C | 1.07954  | 1.19102 | -0.06458 |
| N | 1.75341  | 2.39633 | -0.20055 |
| H | 2.75657  | 2.47936 | -0.28176 |
| C | -0.40133 | 2.88824 | -0.31091 |

|   |          |          |          |
|---|----------|----------|----------|
| C | 1.32539  | 4.84063  | -0.57124 |
| H | 1.93513  | 5.19921  | 0.26798  |
| H | 1.92946  | 4.94941  | -1.48149 |
| H | 0.45959  | 5.50178  | -0.66397 |
| C | 1.80349  | -0.05971 | 0.14506  |
| C | 3.05567  | -0.07287 | 0.78508  |
| C | 1.25745  | -1.28008 | -0.30190 |
| C | 3.73642  | -1.27662 | 0.97140  |
| H | 3.48200  | 0.85046  | 1.16498  |
| C | 1.93823  | -2.48077 | -0.09039 |
| H | 0.31851  | -1.27060 | -0.83644 |
| C | 3.18852  | -2.48248 | 0.54555  |
| H | 4.70197  | -1.27554 | 1.46956  |
| H | 3.70350  | -3.42611 | 0.69364  |
| O | 1.46947  | -3.70204 | -0.48312 |
| C | 0.18919  | -3.75669 | -1.10424 |
| H | -0.59108 | -3.35596 | -0.44567 |
| H | 0.17989  | -3.20434 | -2.05167 |
| H | -0.00443 | -4.81243 | -1.29837 |
| C | -0.28558 | 1.47847  | -0.12132 |
| C | -1.42208 | 0.50388  | 0.04525  |
| H | -1.66442 | 0.03698  | -0.92044 |
| H | -1.10291 | -0.32065 | 0.69657  |
| C | -2.69839 | 1.12749  | 0.62848  |
| H | -2.43737 | 1.67845  | 1.54125  |
| H | -3.10056 | 1.86930  | -0.07497 |
| C | -3.78881 | 0.09854  | 0.95402  |
| H | -3.40002 | -0.62072 | 1.69013  |
| H | -4.62670 | 0.61427  | 1.44385  |
| C | -4.32612 | -0.66790 | -0.26050 |
| H | -4.66123 | 0.05201  | -1.02092 |
| H | -3.51780 | -1.24840 | -0.72331 |
| C | -5.47837 | -1.60910 | 0.09995  |
| H | -5.16033 | -2.35345 | 0.84043  |
| H | -6.32064 | -1.05360 | 0.53048  |
| H | -5.84701 | -2.14894 | -0.77967 |
| H | -1.32055 | 3.45369  | -0.38508 |

#### 4e\_conformer-159

|   |          |         |          |
|---|----------|---------|----------|
| C | 0.05269  | 3.12802 | -0.14697 |
| C | -0.37351 | 0.90034 | 0.01706  |
| N | -0.87511 | 2.13844 | -0.36167 |
| H | -1.75126 | 2.27085 | -0.84635 |
| C | 1.16294  | 2.51958 | 0.40978  |
| C | -0.21189 | 4.55451 | -0.50265 |

|   |          |          |          |
|---|----------|----------|----------|
| H | 0.64416  | 5.17324  | -0.22038 |
| H | -0.37905 | 4.68498  | -1.57984 |
| H | -1.09714 | 4.94751  | 0.01349  |
| C | -1.19065 | -0.30708 | -0.08926 |
| C | -0.61339 | -1.56351 | -0.33707 |
| C | -2.59223 | -0.21862 | 0.05000  |
| C | -1.41980 | -2.69958 | -0.42856 |
| H | 0.45562  | -1.64717 | -0.48997 |
| C | -3.38982 | -1.35906 | -0.06186 |
| H | -3.03968 | 0.74051  | 0.27955  |
| C | -2.80115 | -2.61100 | -0.29709 |
| H | -0.96312 | -3.66633 | -0.62174 |
| H | -3.43849 | -3.48592 | -0.37393 |
| O | -4.74992 | -1.35808 | 0.05859  |
| C | -5.39989 | -0.11271 | 0.29056  |
| H | -6.46682 | -0.33536 | 0.33271  |
| H | -5.08249 | 0.33282  | 1.24115  |
| H | -5.20594 | 0.59638  | -0.52331 |
| C | 0.90899  | 1.11963  | 0.51931  |
| C | 1.85497  | 0.10844  | 1.10113  |
| H | 2.34516  | 0.53818  | 1.98556  |
| H | 1.29886  | -0.76906 | 1.45265  |
| C | 2.94785  | -0.34627 | 0.11658  |
| H | 2.47645  | -0.75951 | -0.78659 |
| H | 3.51103  | 0.53562  | -0.21305 |
| C | 3.89209  | -1.38879 | 0.72208  |
| H | 4.38758  | -0.95857 | 1.60513  |
| H | 3.29347  | -2.23468 | 1.08881  |
| C | 4.95755  | -1.91619 | -0.24943 |
| H | 5.50584  | -2.73354 | 0.23747  |
| H | 4.45959  | -2.35924 | -1.12356 |
| C | 5.95705  | -0.85279 | -0.71592 |
| H | 6.45772  | -0.38440 | 0.14083  |
| H | 6.73046  | -1.29171 | -1.35639 |
| H | 5.46657  | -0.05780 | -1.28817 |
| H | 2.06579  | 3.02923  | 0.72266  |

4e\_conformer-160

|   |          |         |          |
|---|----------|---------|----------|
| C | 1.12676  | 3.15408 | -0.31844 |
| C | -0.28360 | 1.38822 | -0.08916 |
| N | -0.16585 | 2.77070 | -0.06225 |
| H | -0.94811 | 3.40499 | 0.01356  |
| C | 1.86278  | 1.99455 | -0.48521 |
| C | 1.53135  | 4.59059 | -0.38481 |
| H | 1.00324  | 5.12975 | -1.18210 |

|   |          |          |          |
|---|----------|----------|----------|
| H | 1.32525  | 5.11790  | 0.55547  |
| H | 2.60370  | 4.66610  | -0.58415 |
| C | -1.56705 | 0.73913  | 0.16900  |
| C | -2.51057 | 1.32906  | 1.03831  |
| C | -1.89755 | -0.47493 | -0.44822 |
| C | -3.73196 | 0.70839  | 1.26952  |
| H | -2.26938 | 2.25477  | 1.55169  |
| C | -3.12366 | -1.10262 | -0.19576 |
| H | -1.22145 | -0.93937 | -1.15633 |
| C | -4.05527 | -0.51123 | 0.66527  |
| H | -4.44911 | 1.16896  | 1.94339  |
| H | -5.01153 | -0.97734 | 0.86766  |
| O | -3.32280 | -2.28283 | -0.85403 |
| C | -4.56186 | -2.95530 | -0.65461 |
| H | -5.40814 | -2.33796 | -0.97942 |
| H | -4.51448 | -3.85738 | -1.26601 |
| H | -4.70043 | -3.23411 | 0.39692  |
| C | 0.98820  | 0.87453  | -0.34387 |
| C | 1.38543  | -0.57703 | -0.39098 |
| H | 0.64679  | -1.17423 | 0.15784  |
| H | 1.35642  | -0.95174 | -1.42644 |
| C | 2.77996  | -0.85946 | 0.18610  |
| H | 3.52940  | -0.29416 | -0.38042 |
| H | 2.82631  | -0.48500 | 1.21833  |
| C | 3.13005  | -2.35059 | 0.16517  |
| H | 2.34322  | -2.90600 | 0.69480  |
| H | 3.11314  | -2.71174 | -0.87398 |
| C | 4.48876  | -2.68861 | 0.79511  |
| H | 4.49821  | -2.34166 | 1.83811  |
| H | 4.59752  | -3.78056 | 0.83474  |
| C | 5.68788  | -2.09446 | 0.04895  |
| H | 5.69263  | -2.41405 | -1.00080 |
| H | 5.67203  | -0.99915 | 0.06164  |
| H | 6.63304  | -2.41619 | 0.50082  |
| H | 2.92727  | 1.95989  | -0.67549 |

4e\_conformer-161

|   |          |          |          |
|---|----------|----------|----------|
| C | -2.92412 | -1.60170 | -0.09018 |
| C | -0.76099 | -0.90166 | -0.11460 |
| N | -1.71157 | -1.66001 | 0.55360  |
| H | -1.49996 | -2.27749 | 1.32466  |
| C | -2.75752 | -0.76019 | -1.17460 |
| C | -4.11103 | -2.37626 | 0.38186  |
| H | -3.94421 | -3.46011 | 0.32705  |
| H | -4.36526 | -2.13887 | 1.42267  |

|   |          |          |          |
|---|----------|----------|----------|
| H | -4.97982 | -2.14072 | -0.23874 |
| C | 0.58563  | -0.74508 | 0.43778  |
| C | 0.77566  | -0.64911 | 1.82625  |
| C | 1.70857  | -0.69069 | -0.41009 |
| C | 2.06075  | -0.48927 | 2.34897  |
| H | -0.08287 | -0.66525 | 2.48991  |
| C | 2.98711  | -0.50948 | 0.12190  |
| H | 1.56651  | -0.81725 | -1.47464 |
| C | 3.16705  | -0.41086 | 1.51028  |
| H | 2.19824  | -0.41058 | 3.42378  |
| H | 4.17020  | -0.27708 | 1.90198  |
| O | 4.12476  | -0.43484 | -0.62921 |
| C | 3.99455  | -0.49881 | -2.04573 |
| H | 3.35966  | 0.31145  | -2.42435 |
| H | 5.00377  | -0.38770 | -2.44426 |
| H | 3.58013  | -1.46222 | -2.36645 |
| C | -1.40210 | -0.31204 | -1.20229 |
| C | -0.87076 | 0.74364  | -2.13168 |
| H | 0.21919  | 0.68133  | -2.20501 |
| H | -1.25819 | 0.55856  | -3.14246 |
| C | -1.23749 | 2.18914  | -1.72735 |
| H | -0.86354 | 2.85455  | -2.51668 |
| H | -2.33049 | 2.30107  | -1.72207 |
| C | -0.66469 | 2.63650  | -0.36846 |
| H | 0.31162  | 2.15653  | -0.21314 |
| H | -0.46958 | 3.71776  | -0.39712 |
| C | -1.56600 | 2.34900  | 0.83959  |
| H | -2.51091 | 2.89724  | 0.71446  |
| H | -1.82604 | 1.28655  | 0.86390  |
| C | -0.90969 | 2.74546  | 2.16414  |
| H | 0.00831  | 2.16858  | 2.32767  |
| H | -0.64263 | 3.81003  | 2.17310  |
| H | -1.57641 | 2.56103  | 3.01479  |
| H | -3.53443 | -0.48012 | -1.87526 |

#### 4e\_conformer-162

|   |          |          |          |
|---|----------|----------|----------|
| C | -2.93751 | -1.60563 | -0.49344 |
| C | -0.79992 | -0.83472 | -0.37646 |
| N | -1.68045 | -1.83874 | 0.00452  |
| H | -1.39975 | -2.69054 | 0.46904  |
| C | -2.87227 | -0.40952 | -1.18602 |
| C | -4.06984 | -2.55375 | -0.27014 |
| H | -3.88046 | -3.53524 | -0.72432 |
| H | -4.25801 | -2.72074 | 0.79803  |
| H | -4.98459 | -2.15165 | -0.71383 |

|   |          |          |          |
|---|----------|----------|----------|
| C | 0.59420  | -0.86799 | 0.06103  |
| C | 0.95470  | -1.50726 | 1.26760  |
| C | 1.60755  | -0.27616 | -0.70432 |
| C | 2.28341  | -1.53945 | 1.67373  |
| H | 0.18856  | -1.94455 | 1.89998  |
| C | 2.94119  | -0.29986 | -0.28109 |
| H | 1.38253  | 0.20103  | -1.65037 |
| C | 3.29212  | -0.93837 | 0.91448  |
| H | 2.54674  | -2.02919 | 2.60715  |
| H | 4.31885  | -0.97047 | 1.25710  |
| O | 3.82974  | 0.31816  | -1.11443 |
| C | 5.20499  | 0.30887  | -0.74598 |
| H | 5.59278  | -0.71457 | -0.67587 |
| H | 5.73067  | 0.84300  | -1.53855 |
| H | 5.36622  | 0.82273  | 0.20935  |
| C | -1.53819 | 0.08860  | -1.11912 |
| C | -1.09462 | 1.41575  | -1.67740 |
| H | -0.30635 | 1.27292  | -2.42849 |
| H | -1.94124 | 1.85330  | -2.22255 |
| C | -0.59463 | 2.44864  | -0.64572 |
| H | 0.22969  | 2.01825  | -0.06650 |
| H | -0.16335 | 3.28825  | -1.20729 |
| C | -1.66948 | 3.01301  | 0.29853  |
| H | -1.26350 | 3.91914  | 0.77155  |
| H | -2.52653 | 3.34500  | -0.30539 |
| C | -2.17572 | 2.08234  | 1.41357  |
| H | -2.96329 | 2.61484  | 1.96515  |
| H | -2.64740 | 1.19691  | 0.97629  |
| C | -1.08739 | 1.64684  | 2.39899  |
| H | -1.51274 | 1.05106  | 3.21532  |
| H | -0.32262 | 1.03473  | 1.91177  |
| H | -0.58805 | 2.51649  | 2.84591  |
| H | -3.70456 | 0.07714  | -1.67912 |

4e\_conformer-163

|   |          |          |          |
|---|----------|----------|----------|
| C | -2.79859 | -1.76139 | -0.07387 |
| C | -0.67388 | -1.02309 | 0.26031  |
| N | -1.47007 | -2.00023 | -0.32392 |
| H | -1.12322 | -2.70977 | -0.95339 |
| C | -2.85793 | -0.62686 | 0.71441  |
| C | -3.87926 | -2.63446 | -0.62265 |
| H | -3.89464 | -2.62645 | -1.72038 |
| H | -3.76190 | -3.67887 | -0.30672 |
| H | -4.85412 | -2.28443 | -0.27271 |
| C | 0.78287  | -1.08773 | 0.13766  |



|   |          |          |          |
|---|----------|----------|----------|
| C | 1.43777  | -2.33752 | 0.08306  |
| C | 1.56065  | 0.07429  | 0.05042  |
| C | 2.81956  | -2.39902 | -0.05154 |
| H | 0.86243  | -3.25339 | 0.17615  |
| C | 2.95413  | 0.00392  | -0.06742 |
| H | 1.09884  | 1.05298  | 0.04293  |
| C | 3.59658  | -1.23818 | -0.12366 |
| H | 3.31261  | -3.36651 | -0.08877 |
| H | 4.67237  | -1.31329 | -0.22229 |
| O | 3.59490  | 1.20810  | -0.13876 |
| C | 5.01086  | 1.20068  | -0.28771 |
| H | 5.31280  | 2.24798  | -0.32974 |
| H | 5.49979  | 0.71405  | 0.56484  |
| H | 5.31229  | 0.69611  | -1.21364 |
| C | -1.52940 | -0.14864 | 0.92801  |
| C | -1.17391 | 1.02833  | 1.79482  |
| H | -1.58668 | 0.85370  | 2.79878  |
| H | -0.08795 | 1.09096  | 1.92363  |
| C | -1.71171 | 2.39204  | 1.31112  |
| H | -2.79138 | 2.30872  | 1.13339  |
| H | -1.59685 | 3.10389  | 2.13931  |
| C | -1.02279 | 2.99605  | 0.07663  |
| H | -1.35763 | 4.03908  | -0.01955 |
| H | 0.05894  | 3.04789  | 0.26832  |
| C | -1.26212 | 2.29517  | -1.27115 |
| H | -0.69223 | 2.83716  | -2.03840 |
| H | -0.85699 | 1.27871  | -1.24483 |
| C | -2.73447 | 2.23697  | -1.68758 |
| H | -3.18878 | 3.23620  | -1.67963 |
| H | -2.83919 | 1.83045  | -2.70030 |
| H | -3.31231 | 1.59582  | -1.01453 |
| H | -3.76511 | -0.18754 | 1.10989  |

#### 4e\_conformer-164

|   |          |         |          |
|---|----------|---------|----------|
| C | 2.14400  | 2.88644 | -0.28263 |
| C | 0.38144  | 1.45327 | -0.14706 |
| N | 0.80440  | 2.76893 | -0.01208 |
| H | 0.18320  | 3.55043 | 0.14058  |
| C | 2.60155  | 1.61322 | -0.57320 |
| C | 2.84984  | 4.20239 | -0.24808 |
| H | 2.44542  | 4.90516 | -0.98829 |
| H | 2.76988  | 4.68406 | 0.73485  |
| H | 3.91151  | 4.06080 | -0.46740 |
| C | -1.00969 | 1.09067 | 0.11880  |
| C | -1.80019 | 1.86347 | 0.99788  |

|   |          |          |          |
|---|----------|----------|----------|
| C | -1.59902 | -0.02374 | -0.49384 |
| C | -3.12454 | 1.51757  | 1.23815  |
| H | -1.36624 | 2.71241  | 1.51690  |
| C | -2.92849 | -0.37454 | -0.23439 |
| H | -1.04303 | -0.63190 | -1.19649 |
| C | -3.70761 | 0.39947  | 0.63376  |
| H | -3.71958 | 2.11844  | 1.92036  |
| H | -4.73935 | 0.14697  | 0.84432  |
| O | -3.37742 | -1.48574 | -0.89026 |
| C | -4.72832 | -1.88275 | -0.67958 |
| H | -5.42885 | -1.10153 | -0.99855 |
| H | -4.87669 | -2.77465 | -1.28977 |
| H | -4.91360 | -2.12627 | 0.37355  |
| C | 1.50740  | 0.70320  | -0.49782 |
| C | 1.62569  | -0.78715 | -0.67463 |
| H | 0.96072  | -1.15058 | -1.46999 |
| H | 2.64234  | -1.00575 | -1.02120 |
| C | 1.34448  | -1.58204 | 0.61330  |
| H | 2.08014  | -1.28944 | 1.37316  |
| H | 0.36526  | -1.28664 | 1.00698  |
| C | 1.35566  | -3.10405 | 0.41534  |
| H | 1.12741  | -3.58453 | 1.37728  |
| H | 0.53756  | -3.37671 | -0.26662 |
| C | 2.66928  | -3.68664 | -0.12922 |
| H | 2.54995  | -4.77299 | -0.23499 |
| H | 2.85355  | -3.30434 | -1.14173 |
| C | 3.88754  | -3.39730 | 0.75279  |
| H | 3.72375  | -3.75244 | 1.77801  |
| H | 4.78359  | -3.89483 | 0.36488  |
| H | 4.10241  | -2.32403 | 0.80538  |
| H | 3.62531  | 1.35290  | -0.81192 |

#### 4e\_conformer-165

|   |          |          |          |
|---|----------|----------|----------|
| C | -0.07063 | 3.35371  | -0.15138 |
| C | -0.24767 | 1.08825  | -0.09198 |
| N | -0.91021 | 2.28268  | -0.33890 |
| H | -1.83989 | 2.34467  | -0.72876 |
| C | 1.14701  | 2.83947  | 0.25514  |
| C | -0.51507 | 4.76039  | -0.38626 |
| H | -1.37621 | 5.02739  | 0.23959  |
| H | 0.29856  | 5.45184  | -0.15126 |
| H | -0.80766 | 4.92959  | -1.43082 |
| C | -0.93914 | -0.19495 | -0.20067 |
| C | -0.26426 | -1.34829 | -0.63057 |
| C | -2.30939 | -0.28738 | 0.12118  |

|   |          |          |          |
|---|----------|----------|----------|
| C | -0.94002 | -2.56665 | -0.71625 |
| H | 0.77385  | -1.28113 | -0.93087 |
| C | -2.98038 | -1.50746 | 0.01353  |
| H | -2.82545 | 0.59264  | 0.48506  |
| C | -2.29112 | -2.65786 | -0.40054 |
| H | -0.40739 | -3.45303 | -1.04963 |
| H | -2.83052 | -3.59692 | -0.46997 |
| O | -4.30266 | -1.68353 | 0.30426  |
| C | -5.05285 | -0.54762 | 0.72174  |
| H | -4.66233 | -0.13321 | 1.65909  |
| H | -5.05313 | 0.23470  | -0.04685 |
| H | -6.07179 | -0.90348 | 0.87916  |
| C | 1.05011  | 1.41568  | 0.29798  |
| C | 2.14351  | 0.48513  | 0.74204  |
| H | 2.64142  | 0.91223  | 1.62416  |
| H | 1.71075  | -0.46815 | 1.06424  |
| C | 3.21384  | 0.23361  | -0.33690 |
| H | 2.75568  | -0.28083 | -1.19196 |
| H | 3.55564  | 1.20326  | -0.72140 |
| C | 4.43137  | -0.55306 | 0.16983  |
| H | 5.15847  | -0.64320 | -0.64955 |
| H | 4.92505  | 0.03564  | 0.95595  |
| C | 4.13286  | -1.95629 | 0.72058  |
| H | 5.07112  | -2.38493 | 1.09679  |
| H | 3.46658  | -1.88114 | 1.58981  |
| C | 3.52350  | -2.91462 | -0.30700 |
| H | 4.15662  | -2.98869 | -1.19999 |
| H | 3.41272  | -3.92178 | 0.11033  |
| H | 2.53110  | -2.58483 | -0.63161 |
| H | 2.01959  | 3.42645  | 0.51379  |

4e\_conformer-166

|   |          |          |          |
|---|----------|----------|----------|
| C | -0.63505 | 3.23433  | -0.38764 |
| C | 0.57887  | 1.33954  | -0.07678 |
| N | 0.61208  | 2.72595  | -0.12518 |
| H | 1.45945  | 3.27425  | -0.08996 |
| C | -1.49554 | 2.15489  | -0.48315 |
| C | -0.88253 | 4.70071  | -0.52881 |
| H | -1.94481 | 4.88246  | -0.71285 |
| H | -0.59771 | 5.25295  | 0.37591  |
| H | -0.31843 | 5.13408  | -1.36504 |
| C | 1.78668  | 0.56748  | 0.20416  |
| C | 2.81453  | 1.10103  | 1.00175  |
| C | 1.94585  | -0.72621 | -0.33261 |
| C | 3.96665  | 0.35532  | 1.25404  |

|   |          |          |          |
|---|----------|----------|----------|
| H | 2.70014  | 2.08330  | 1.44958  |
| C | 3.09407  | -1.47138 | -0.05522 |
| H | 1.18109  | -1.12078 | -0.98652 |
| C | 4.11507  | -0.92833 | 0.73877  |
| H | 4.75362  | 0.77614  | 1.87373  |
| H | 5.00186  | -1.52207 | 0.93539  |
| O | 3.31794  | -2.73293 | -0.52798 |
| C | 2.29976  | -3.34059 | -1.31644 |
| H | 2.66255  | -4.34145 | -1.55397 |
| H | 1.35666  | -3.41466 | -0.76148 |
| H | 2.12854  | -2.78494 | -2.24637 |
| C | -0.74603 | 0.95529  | -0.29021 |
| C | -1.29933 | -0.44538 | -0.25855 |
| H | -1.26712 | -0.89558 | -1.26357 |
| H | -0.65521 | -1.07748 | 0.36566  |
| C | -2.73965 | -0.53806 | 0.26347  |
| H | -2.79248 | -0.08550 | 1.26353  |
| H | -3.39892 | 0.05702  | -0.37950 |
| C | -3.24374 | -1.98323 | 0.32694  |
| H | -3.21808 | -2.41998 | -0.68260 |
| H | -2.54436 | -2.57515 | 0.93408  |
| C | -4.65740 | -2.13402 | 0.90642  |
| H | -4.88175 | -3.20339 | 1.01525  |
| H | -4.67736 | -1.71190 | 1.92116  |
| C | -5.75274 | -1.47809 | 0.05930  |
| H | -5.74290 | -1.87127 | -0.96512 |
| H | -6.74587 | -1.66921 | 0.48140  |
| H | -5.62358 | -0.39196 | -0.00152 |
| H | -2.56036 | 2.22715  | -0.65985 |

#### 4e\_conformer-167

|   |          |          |          |
|---|----------|----------|----------|
| C | 0.64370  | 3.26678  | -0.42543 |
| C | -0.53816 | 1.35533  | -0.09382 |
| N | -0.57233 | 2.74220  | -0.06597 |
| H | -1.41055 | 3.28561  | 0.08235  |
| C | 1.48722  | 2.19602  | -0.66278 |
| C | 0.87943  | 4.73928  | -0.51325 |
| H | 0.23005  | 5.21556  | -1.25941 |
| H | 0.69535  | 5.24133  | 0.44526  |
| H | 1.91637  | 4.93342  | -0.80030 |
| C | -1.71447 | 0.56663  | 0.26471  |
| C | -2.64913 | 1.04907  | 1.19781  |
| C | -1.93720 | -0.69061 | -0.33244 |
| C | -3.77306 | 0.28859  | 1.52296  |
| H | -2.48181 | 2.00165  | 1.69098  |

|   |          |          |          |
|---|----------|----------|----------|
| C | -3.05486 | -1.45191 | 0.01682  |
| H | -1.24759 | -1.04232 | -1.08685 |
| C | -3.98301 | -0.96000 | 0.94659  |
| H | -4.48791 | 0.66924  | 2.24721  |
| H | -4.84819 | -1.56495 | 1.19772  |
| O | -3.33623 | -2.68066 | -0.50855 |
| C | -2.41232 | -3.23629 | -1.43879 |
| H | -2.33666 | -2.62111 | -2.34359 |
| H | -1.41617 | -3.34728 | -0.99354 |
| H | -2.80605 | -4.21919 | -1.70076 |
| C | 0.75745  | 0.98602  | -0.45830 |
| C | 1.30896  | -0.41226 | -0.55270 |
| H | 0.71280  | -1.08206 | 0.07968  |
| H | 1.20128  | -0.80215 | -1.57738 |
| C | 2.78379  | -0.53059 | -0.14323 |
| H | 3.40456  | 0.08581  | -0.80768 |
| H | 2.90582  | -0.11597 | 0.86503  |
| C | 3.28644  | -1.97690 | -0.18933 |
| H | 2.69926  | -2.58628 | 0.51372  |
| H | 3.08879  | -2.38808 | -1.18942 |
| C | 4.77980  | -2.13638 | 0.12869  |
| H | 5.06596  | -3.18380 | -0.03495 |
| H | 5.36568  | -1.54304 | -0.58761 |
| C | 5.15938  | -1.73204 | 1.55694  |
| H | 6.22074  | -1.92247 | 1.75258  |
| H | 4.97552  | -0.66766 | 1.73959  |
| H | 4.57590  | -2.30037 | 2.29223  |
| H | 2.52923  | 2.27949  | -0.94145 |

4e\_conformer-168

|   |          |          |          |
|---|----------|----------|----------|
| C | 0.63512  | 3.23431  | -0.38775 |
| C | -0.57878 | 1.33954  | -0.07674 |
| N | -0.61199 | 2.72595  | -0.12512 |
| H | -1.45934 | 3.27425  | -0.08980 |
| C | 1.49559  | 2.15488  | -0.48337 |
| C | 0.88259  | 4.70069  | -0.52894 |
| H | 1.94485  | 4.88244  | -0.71314 |
| H | 0.31838  | 5.13408  | -1.36509 |
| H | 0.59792  | 5.25293  | 0.37583  |
| C | -1.78658 | 0.56749  | 0.20428  |
| C | -2.81426 | 1.10097  | 1.00213  |
| C | -1.94592 | -0.72610 | -0.33268 |
| C | -3.96638 | 0.35528  | 1.25450  |
| H | -2.69973 | 2.08316  | 1.45010  |
| C | -3.09413 | -1.47126 | -0.05520 |

|   |          |          |          |
|---|----------|----------|----------|
| H | -1.18129 | -1.12058 | -0.98681 |
| C | -4.11496 | -0.92828 | 0.73906  |
| H | -4.75322 | 0.77604  | 1.87439  |
| H | -5.00174 | -1.52200 | 0.93573  |
| O | -3.31815 | -2.73272 | -0.52813 |
| C | -2.30013 | -3.34033 | -1.31684 |
| H | -2.66302 | -4.34113 | -1.55446 |
| H | -2.12902 | -2.78455 | -2.24671 |
| H | -1.35695 | -3.41455 | -0.76203 |
| C | 0.74609  | 0.95527  | -0.29034 |
| C | 1.29935  | -0.44541 | -0.25880 |
| H | 0.65513  | -1.07756 | 0.36526  |
| H | 1.26728  | -0.89549 | -1.26387 |
| C | 2.73960  | -0.53819 | 0.26344  |
| H | 3.39899  | 0.05700  | -0.37931 |
| H | 2.79226  | -0.08579 | 1.26358  |
| C | 3.24367  | -1.98337 | 0.32674  |
| H | 2.54418  | -2.57539 | 0.93363  |
| H | 3.21821  | -2.41993 | -0.68289 |
| C | 4.65722  | -2.13427 | 0.90647  |
| H | 4.67697  | -1.71237 | 1.92130  |
| H | 4.88155  | -3.20366 | 1.01511  |
| C | 5.75272  | -1.47814 | 0.05971  |
| H | 5.62357  | -0.39200 | -0.00089 |
| H | 6.74577  | -1.66935 | 0.48197  |
| H | 5.74308  | -1.87110 | -0.96480 |
| H | 2.56039  | 2.22713  | -0.66022 |

4e\_conformer-169

|   |          |          |          |
|---|----------|----------|----------|
| C | -3.54475 | -0.93459 | -0.29896 |
| C | -1.30817 | -0.87176 | 0.10273  |
| N | -2.36252 | -1.62801 | -0.39016 |
| H | -2.24865 | -2.51015 | -0.86884 |
| C | -3.25023 | 0.27763  | 0.29580  |
| C | -4.83497 | -1.49696 | -0.79961 |
| H | -5.65084 | -0.79968 | -0.59095 |
| H | -4.81342 | -1.67288 | -1.88313 |
| H | -5.07748 | -2.45375 | -0.31992 |
| C | 0.04692  | -1.42557 | 0.13376  |
| C | 0.25731  | -2.79399 | 0.40688  |
| C | 1.16013  | -0.61750 | -0.12230 |
| C | 1.54790  | -3.31048 | 0.42730  |
| H | -0.58882 | -3.43677 | 0.62948  |
| C | 2.45813  | -1.13958 | -0.07917 |
| H | 1.03493  | 0.42261  | -0.38969 |

|   |          |          |          |
|---|----------|----------|----------|
| C | 2.66203  | -2.49723 | 0.19361  |
| H | 1.70119  | -4.36437 | 0.64259  |
| H | 3.65726  | -2.92320 | 0.22379  |
| O | 3.45646  | -0.24346 | -0.33638 |
| C | 4.79759  | -0.72165 | -0.33139 |
| H | 5.07488  | -1.12291 | 0.65084  |
| H | 4.94835  | -1.49553 | -1.09372 |
| H | 5.42377  | 0.14148  | -0.56083 |
| C | -1.84549 | 0.33197  | 0.55547  |
| C | -1.15582 | 1.45628  | 1.28154  |
| H | -1.62796 | 1.58226  | 2.26595  |
| H | -0.11084 | 1.19508  | 1.47997  |
| C | -1.23446 | 2.80849  | 0.54072  |
| H | -2.28309 | 2.99594  | 0.27796  |
| H | -0.94595 | 3.61093  | 1.23149  |
| C | -0.37062 | 2.87702  | -0.72784 |
| H | -0.51169 | 1.94749  | -1.29573 |
| H | -0.73399 | 3.68634  | -1.37584 |
| C | 1.12735  | 3.10715  | -0.46242 |
| H | 1.48934  | 2.39950  | 0.29476  |
| H | 1.69160  | 2.88301  | -1.37731 |
| C | 1.45539  | 4.53393  | -0.01087 |
| H | 0.94548  | 4.79039  | 0.92463  |
| H | 2.53136  | 4.65889  | 0.15548  |
| H | 1.14511  | 5.26428  | -0.76832 |
| H | -3.97409 | 1.04568  | 0.53802  |

4e\_conformer-170

|   |          |          |          |
|---|----------|----------|----------|
| C | 0.15538  | 3.19467  | -0.10220 |
| C | 0.43063  | 0.93731  | -0.12049 |
| N | 1.05435  | 2.16945  | -0.26516 |
| H | 2.00863  | 2.28895  | -0.57325 |
| C | -1.06601 | 2.61204  | 0.18391  |
| C | 0.55237  | 4.62780  | -0.24382 |
| H | -0.30839 | 5.27329  | -0.04955 |
| H | 1.34705  | 4.90394  | 0.46103  |
| H | 0.92017  | 4.85409  | -1.25318 |
| C | 1.19120  | -0.30712 | -0.22046 |
| C | 0.60438  | -1.48901 | -0.70229 |
| C | 2.54871  | -0.33075 | 0.16481  |
| C | 1.35613  | -2.66285 | -0.78208 |
| H | -0.42364 | -1.48320 | -1.04324 |
| C | 3.29518  | -1.50618 | 0.06301  |
| H | 2.99619  | 0.56661  | 0.57379  |
| C | 2.69519  | -2.68390 | -0.40829 |

|   |          |          |          |
|---|----------|----------|----------|
| H | 0.89262  | -3.57101 | -1.15742 |
| H | 3.29120  | -3.58841 | -0.47326 |
| O | 4.61090  | -1.61139 | 0.41262  |
| C | 5.27132  | -0.44430 | 0.89114  |
| H | 6.30150  | -0.74331 | 1.08868  |
| H | 5.26012  | 0.35629  | 0.14161  |
| H | 4.81388  | -0.07782 | 1.81814  |
| C | -0.90783 | 1.19386  | 0.17620  |
| C | -1.99307 | 0.19779  | 0.46960  |
| H | -1.55476 | -0.74852 | 0.81006  |
| H | -2.60460 | 0.57189  | 1.29973  |
| C | -2.90550 | -0.07829 | -0.74147 |
| H | -3.40579 | 0.85663  | -1.02998 |
| H | -2.27954 | -0.36217 | -1.59781 |
| C | -3.95296 | -1.17169 | -0.49740 |
| H | -4.47976 | -1.37520 | -1.44038 |
| H | -3.44222 | -2.10739 | -0.22472 |
| C | -4.98851 | -0.83088 | 0.58053  |
| H | -4.48793 | -0.68375 | 1.54597  |
| H | -5.46313 | 0.12904  | 0.33156  |
| C | -6.06202 | -1.91207 | 0.72918  |
| H | -5.61397 | -2.87533 | 1.00281  |
| H | -6.79178 | -1.65068 | 1.50391  |
| H | -6.60797 | -2.05678 | -0.21125 |
| H | -1.98292 | 3.14916  | 0.39261  |

#### 4e\_conformer-171

|   |          |          |          |
|---|----------|----------|----------|
| C | -0.94950 | 3.21779  | -0.20888 |
| C | -0.10099 | 1.12385  | 0.04376  |
| N | 0.14540  | 2.41276  | -0.40874 |
| H | 0.96616  | 2.67815  | -0.93442 |
| C | -1.90621 | 2.44043  | 0.41573  |
| C | -0.97445 | 4.64631  | -0.64523 |
| H | -0.16497 | 5.22831  | -0.18649 |
| H | -0.86921 | 4.74507  | -1.73359 |
| H | -1.92381 | 5.10656  | -0.35846 |
| C | 0.94259  | 0.09968  | -0.04087 |
| C | 0.63343  | -1.24010 | -0.34813 |
| C | 2.28554  | 0.44609  | 0.16349  |
| C | 1.64547  | -2.19002 | -0.42486 |
| H | -0.39037 | -1.51893 | -0.55852 |
| C | 3.30164  | -0.51259 | 0.06739  |
| H | 2.56312  | 1.46174  | 0.42788  |
| C | 2.98553  | -1.84555 | -0.22143 |
| H | 1.39629  | -3.22008 | -0.66467 |



|   |          |          |          |
|---|----------|----------|----------|
| H | 3.75524  | -2.60389 | -0.29389 |
| O | 4.56757  | -0.04989 | 0.28682  |
| C | 5.63929  | -0.98517 | 0.21965  |
| H | 5.52609  | -1.77664 | 0.97030  |
| H | 5.71163  | -1.43885 | -0.77610 |
| H | 6.54645  | -0.41580 | 0.42603  |
| C | -1.38642 | 1.11902  | 0.58213  |
| C | -2.09760 | 0.00780  | 1.30747  |
| H | -1.44249 | -0.86503 | 1.39927  |
| H | -2.30987 | 0.33486  | 2.33510  |
| C | -3.43506 | -0.39617 | 0.65122  |
| H | -4.00396 | -1.01833 | 1.35371  |
| H | -4.03135 | 0.51199  | 0.49827  |
| C | -3.27512 | -1.13250 | -0.68746 |
| H | -4.21380 | -1.07051 | -1.25493 |
| H | -2.52142 | -0.60458 | -1.28705 |
| C | -2.88965 | -2.61550 | -0.55184 |
| H | -2.55166 | -2.98759 | -1.52805 |
| H | -2.03189 | -2.71973 | 0.12570  |
| C | -4.03416 | -3.50176 | -0.04976 |
| H | -4.89391 | -3.45085 | -0.72920 |
| H | -3.72224 | -4.55006 | 0.01936  |
| H | -4.37893 | -3.19451 | 0.94400  |
| H | -2.87945 | 2.78884  | 0.73804  |

#### 4e\_conformer-172

|   |          |          |          |
|---|----------|----------|----------|
| C | -2.99845 | -1.62294 | -0.10077 |
| C | -0.84868 | -0.89621 | -0.24084 |
| N | -1.73693 | -1.72035 | 0.43544  |
| H | -1.45941 | -2.39978 | 1.12963  |
| C | -2.92609 | -0.69023 | -1.11892 |
| C | -4.13808 | -2.45027 | 0.39748  |
| H | -3.96887 | -3.52335 | 0.23789  |
| H | -4.30916 | -2.30454 | 1.47162  |
| H | -5.05576 | -2.17537 | -0.12951 |
| C | 0.53865  | -0.77247 | 0.21017  |
| C | 0.84107  | -0.79107 | 1.58820  |
| C | 1.59075  | -0.63694 | -0.70353 |
| C | 2.15769  | -0.66251 | 2.01617  |
| H | 0.03838  | -0.87369 | 2.31397  |
| C | 2.91226  | -0.49017 | -0.26457 |
| H | 1.40396  | -0.66465 | -1.77095 |
| C | 3.20610  | -0.50430 | 1.10440  |
| H | 2.38040  | -0.67147 | 3.07956  |
| H | 4.22221  | -0.39810 | 1.46346  |

|   |          |          |          |
|---|----------|----------|----------|
| O | 3.84615  | -0.35733 | -1.25206 |
| C | 5.21028  | -0.22624 | -0.86541 |
| H | 5.55420  | -1.10671 | -0.30933 |
| H | 5.77700  | -0.13835 | -1.79323 |
| H | 5.36793  | 0.67117  | -0.25516 |
| C | -1.58003 | -0.22417 | -1.21751 |
| C | -1.13001 | 0.91527  | -2.08854 |
| H | -0.04694 | 0.87938  | -2.23950 |
| H | -1.58373 | 0.80924  | -3.08302 |
| C | -1.48788 | 2.31320  | -1.53607 |
| H | -1.17528 | 3.05207  | -2.28570 |
| H | -2.57948 | 2.40402  | -1.45028 |
| C | -0.83264 | 2.64928  | -0.18234 |
| H | 0.15680  | 2.17358  | -0.13316 |
| H | -0.65140 | 3.73191  | -0.12705 |
| C | -1.65008 | 2.24134  | 1.05059  |
| H | -2.60466 | 2.78699  | 1.03864  |
| H | -1.90157 | 1.17807  | 0.99401  |
| C | -0.90983 | 2.52302  | 2.36021  |
| H | -0.64916 | 3.58544  | 2.44960  |
| H | -1.51744 | 2.25349  | 3.23216  |
| H | 0.02073  | 1.94508  | 2.40946  |
| H | -3.75963 | -0.36097 | -1.72699 |

#### 4e\_conformer-173

|   |          |          |          |
|---|----------|----------|----------|
| C | -1.13865 | 2.78160  | -0.27224 |
| C | -0.15519 | 0.79293  | 0.22764  |
| N | -0.03066 | 1.99290  | -0.46157 |
| H | 0.70998  | 2.19218  | -1.11874 |
| C | -1.97816 | 2.09112  | 0.58195  |
| C | -1.28869 | 4.11191  | -0.93485 |
| H | -0.46982 | 4.79420  | -0.67335 |
| H | -1.30292 | 4.02564  | -2.02924 |
| H | -2.22742 | 4.57851  | -0.62443 |
| C | 0.91465  | -0.20431 | 0.17599  |
| C | 0.64077  | -1.58150 | 0.18504  |
| C | 2.25715  | 0.22148  | 0.09046  |
| C | 1.68666  | -2.50460 | 0.12387  |
| H | -0.38391 | -1.92844 | 0.20831  |
| C | 3.29373  | -0.71085 | 0.01234  |
| H | 2.47488  | 1.28202  | 0.11804  |
| C | 3.00905  | -2.08478 | 0.03467  |
| H | 1.46324  | -3.56785 | 0.12957  |
| H | 3.82958  | -2.79279 | -0.02096 |
| O | 4.61598  | -0.38181 | -0.07341 |

|   |          |          |          |
|---|----------|----------|----------|
| C | 4.96067  | 0.99934  | -0.10542 |
| H | 6.04734  | 1.03452  | -0.19234 |
| H | 4.50815  | 1.50371  | -0.96777 |
| H | 4.65156  | 1.50970  | 0.81479  |
| C | -1.37396 | 0.83748  | 0.90228  |
| C | -1.94866 | -0.16805 | 1.86205  |
| H | -1.21924 | -0.96052 | 2.06254  |
| H | -2.12101 | 0.33433  | 2.82456  |
| C | -3.28876 | -0.80456 | 1.43219  |
| H | -3.71436 | -1.30279 | 2.31328  |
| H | -3.99431 | -0.00698 | 1.16105  |
| C | -3.21559 | -1.83020 | 0.29125  |
| H | -2.45214 | -2.58473 | 0.53459  |
| H | -4.16872 | -2.37744 | 0.25683  |
| C | -2.94239 | -1.25960 | -1.10604 |
| H | -3.71331 | -0.51264 | -1.34197 |
| H | -1.98941 | -0.72209 | -1.11289 |
| C | -2.92515 | -2.34654 | -2.18354 |
| H | -3.87731 | -2.89100 | -2.21520 |
| H | -2.74753 | -1.92317 | -3.17878 |
| H | -2.13219 | -3.07913 | -1.98677 |
| H | -2.92920 | 2.45370  | 0.95139  |

#### 4e\_conformer-174

|   |          |          |          |
|---|----------|----------|----------|
| C | -0.25355 | 3.40716  | 0.14667  |
| C | -0.33606 | 1.20764  | -0.43219 |
| N | -1.05684 | 2.30109  | 0.02977  |
| H | -2.06148 | 2.31333  | 0.13300  |
| C | 1.02028  | 3.01088  | -0.22058 |
| C | -0.78453 | 4.73287  | 0.58450  |
| H | 0.02921  | 5.46133  | 0.63426  |
| H | -1.54089 | 5.12223  | -0.10953 |
| H | -1.25064 | 4.67965  | 1.57668  |
| C | -0.98629 | -0.09005 | -0.60955 |
| C | -0.52498 | -1.01861 | -1.55734 |
| C | -2.10971 | -0.42562 | 0.17603  |
| C | -1.16736 | -2.24831 | -1.70624 |
| H | 0.31851  | -0.77204 | -2.19036 |
| C | -2.75426 | -1.65284 | 0.00690  |
| H | -2.44634 | 0.26421  | 0.93979  |
| C | -2.27956 | -2.57496 | -0.93759 |
| H | -0.80105 | -2.95767 | -2.44319 |
| H | -2.78996 | -3.52618 | -1.04785 |
| O | -3.84474 | -2.05081 | 0.72613  |
| C | -4.37431 | -1.14992 | 1.69304  |

|   |          |          |          |
|---|----------|----------|----------|
| H | -5.23921 | -1.65237 | 2.12801  |
| H | -3.64317 | -0.93460 | 2.48169  |
| H | -4.69310 | -0.20866 | 1.22907  |
| C | 0.98476  | 1.63512  | -0.59179 |
| C | 2.19341  | 0.82118  | -0.97092 |
| H | 2.07647  | 0.37294  | -1.96670 |
| H | 3.05265  | 1.49911  | -1.05348 |
| C | 2.53321  | -0.28874 | 0.03868  |
| H | 2.69330  | 0.17254  | 1.02097  |
| H | 1.66961  | -0.95719 | 0.14617  |
| C | 3.75863  | -1.10878 | -0.37497 |
| H | 3.59296  | -1.50178 | -1.38823 |
| H | 4.63509  | -0.44704 | -0.44243 |
| C | 4.07854  | -2.27921 | 0.56565  |
| H | 3.20806  | -2.94878 | 0.61430  |
| H | 4.89559  | -2.87003 | 0.13062  |
| C | 4.47182  | -1.85041 | 1.98297  |
| H | 3.65125  | -1.33361 | 2.49250  |
| H | 4.74822  | -2.71620 | 2.59541  |
| H | 5.33078  | -1.16786 | 1.96077  |
| H | 1.89952  | 3.64312  | -0.21864 |

#### 4e\_conformer-175

|   |          |          |          |
|---|----------|----------|----------|
| C | 0.25354  | 3.40714  | 0.14667  |
| C | 0.33605  | 1.20762  | -0.43221 |
| N | 1.05683  | 2.30107  | 0.02976  |
| H | 2.06147  | 2.31331  | 0.13299  |
| C | -1.02029 | 3.01086  | -0.22058 |
| C | 0.78452  | 4.73285  | 0.58451  |
| H | -0.02922 | 5.46130  | 0.63429  |
| H | 1.25065  | 4.67961  | 1.57668  |
| H | 1.54087  | 5.12221  | -0.10953 |
| C | 0.98629  | -0.09006 | -0.60957 |
| C | 0.52502  | -1.01862 | -1.55737 |
| C | 2.10970  | -0.42561 | 0.17603  |
| C | 1.16742  | -2.24831 | -1.70627 |
| H | -0.31846 | -0.77206 | -2.19042 |
| C | 2.75428  | -1.65282 | 0.00691  |
| H | 2.44631  | 0.26422  | 0.93980  |
| C | 2.27962  | -2.57494 | -0.93759 |
| H | 0.80115  | -2.95767 | -2.44322 |
| H | 2.79004  | -3.52615 | -1.04785 |
| O | 3.84475  | -2.05077 | 0.72616  |
| C | 4.37427  | -1.14987 | 1.69309  |
| H | 5.23918  | -1.65231 | 2.12807  |

|   |          |          |          |
|---|----------|----------|----------|
| H | 4.69306  | -0.20860 | 1.22913  |
| H | 3.64312  | -0.93458 | 2.48172  |
| C | -0.98477 | 1.63511  | -0.59181 |
| C | -2.19343 | 0.82118  | -0.97093 |
| H | -3.05266 | 1.49911  | -1.05348 |
| H | -2.07650 | 0.37293  | -1.96671 |
| C | -2.53323 | -0.28874 | 0.03868  |
| H | -1.66964 | -0.95720 | 0.14615  |
| H | -2.69330 | 0.17253  | 1.02097  |
| C | -3.75866 | -1.10877 | -0.37496 |
| H | -4.63512 | -0.44703 | -0.44240 |
| H | -3.59302 | -1.50176 | -1.38823 |
| C | -4.07856 | -2.27921 | 0.56566  |
| H | -4.89562 | -2.87001 | 0.13063  |
| H | -3.20809 | -2.94878 | 0.61428  |
| C | -4.47182 | -1.85041 | 1.98299  |
| H | -5.33076 | -1.16786 | 1.96081  |
| H | -4.74821 | -2.71620 | 2.59543  |
| H | -3.65123 | -1.33362 | 2.49251  |
| H | -1.89953 | 3.64310  | -0.21863 |

#### 4e\_conformer-176

|   |          |          |          |
|---|----------|----------|----------|
| C | -1.30376 | 2.86261  | -0.22349 |
| C | -0.20062 | 0.89472  | 0.06636  |
| N | -0.12420 | 2.19119  | -0.42615 |
| H | 0.64677  | 2.53974  | -0.97782 |
| C | -2.14656 | 1.99374  | 0.44438  |
| C | -1.51450 | 4.26092  | -0.70494 |
| H | -0.76955 | 4.95227  | -0.29088 |
| H | -1.45184 | 4.33257  | -1.79870 |
| H | -2.50464 | 4.61319  | -0.40347 |
| C | 0.97462  | 0.02040  | 0.00322  |
| C | 0.86681  | -1.37068 | -0.20144 |
| C | 2.25748  | 0.57444  | 0.12622  |
| C | 2.00968  | -2.15918 | -0.26471 |
| H | -0.10591 | -1.82524 | -0.33932 |
| C | 3.40498  | -0.22371 | 0.04513  |
| H | 2.38798  | 1.63520  | 0.31557  |
| C | 3.28821  | -1.60512 | -0.14601 |
| H | 1.91237  | -3.22920 | -0.42634 |
| H | 4.16174  | -2.24239 | -0.20500 |
| O | 4.59119  | 0.43948  | 0.17900  |
| C | 5.79101  | -0.32557 | 0.12344  |
| H | 5.89818  | -0.83061 | -0.84406 |
| H | 6.60643  | 0.38714  | 0.25329  |

|   |          |          |          |
|---|----------|----------|----------|
| H | 5.82645  | -1.07149 | 0.92657  |
| C | -1.46817 | 0.75029  | 0.63113  |
| C | -2.01126 | -0.42333 | 1.40294  |
| H | -1.40308 | -1.31137 | 1.21414  |
| H | -1.91410 | -0.22795 | 2.48146  |
| C | -3.49324 | -0.73923 | 1.12098  |
| H | -3.76620 | -1.63002 | 1.70078  |
| H | -4.11452 | 0.07583  | 1.51452  |
| C | -3.85432 | -0.94734 | -0.35743 |
| H | -4.91749 | -1.22023 | -0.41640 |
| H | -3.74852 | 0.00761  | -0.88639 |
| C | -3.02481 | -2.00674 | -1.09613 |
| H | -3.39554 | -2.08129 | -2.12707 |
| H | -1.98768 | -1.65918 | -1.17841 |
| C | -3.05486 | -3.39465 | -0.44998 |
| H | -4.08521 | -3.75725 | -0.34603 |
| H | -2.50261 | -4.12384 | -1.05360 |
| H | -2.60607 | -3.38633 | 0.54971  |
| H | -3.15129 | 2.22927  | 0.77056  |

#### 4e\_conformer-177

|   |          |          |          |
|---|----------|----------|----------|
| C | 2.27162  | 2.19329  | -0.06284 |
| C | 0.59366  | 0.77655  | -0.64658 |
| N | 0.91055  | 2.00932  | -0.09333 |
| H | 0.22920  | 2.72177  | 0.12700  |
| C | 2.84091  | 1.04168  | -0.57409 |
| C | 2.89038  | 3.45690  | 0.43882  |
| H | 2.60081  | 4.32591  | -0.16650 |
| H | 2.59844  | 3.67075  | 1.47492  |
| H | 3.98023  | 3.37581  | 0.40683  |
| C | -0.79839 | 0.33666  | -0.74679 |
| C | -1.25666 | -0.40235 | -1.85643 |
| C | -1.71007 | 0.65336  | 0.27002  |
| C | -2.58229 | -0.81673 | -1.91756 |
| H | -0.57933 | -0.61899 | -2.67462 |
| C | -3.04779 | 0.24690  | 0.19301  |
| H | -1.38846 | 1.19739  | 1.15260  |
| C | -3.49254 | -0.50092 | -0.90368 |
| H | -2.92795 | -1.38443 | -2.77704 |
| H | -4.52095 | -0.83159 | -0.97957 |
| O | -3.83545 | 0.61709  | 1.24509  |
| C | -5.19993 | 0.20963  | 1.23090  |
| H | -5.28992 | -0.88325 | 1.21858  |
| H | -5.63810 | 0.59996  | 2.15034  |
| H | -5.73227 | 0.62612  | 0.36734  |

|   |         |          |          |
|---|---------|----------|----------|
| C | 1.79564 | 0.13841  | -0.94021 |
| C | 2.00663 | -1.26461 | -1.44256 |
| H | 1.04486 | -1.73070 | -1.68094 |
| H | 2.56612 | -1.22202 | -2.38762 |
| C | 2.77612 | -2.18833 | -0.47008 |
| H | 3.24207 | -2.99050 | -1.05746 |
| H | 3.60121 | -1.62876 | -0.01264 |
| C | 1.91633 | -2.85430 | 0.61684  |
| H | 1.14870 | -3.46560 | 0.12058  |
| H | 2.55394 | -3.55842 | 1.17147  |
| C | 1.22385 | -1.92633 | 1.62676  |
| H | 0.50333 | -1.28516 | 1.10913  |
| H | 0.63904 | -2.55355 | 2.31405  |
| C | 2.18579 | -1.05530 | 2.43901  |
| H | 2.71224 | -0.34165 | 1.79780  |
| H | 1.64603 | -0.48121 | 3.20149  |
| H | 2.93657 | -1.66939 | 2.95335  |
| H | 3.90435 | 0.85834  | -0.66371 |

4e\_conformer-178

|   |          |          |          |
|---|----------|----------|----------|
| C | -0.73743 | 3.06735  | 0.13366  |
| C | 0.16548  | 0.98489  | 0.22635  |
| N | 0.42664  | 2.34789  | 0.23694  |
| H | 1.33469  | 2.74989  | 0.42087  |
| C | -1.76711 | 2.14968  | 0.02489  |
| C | -0.75290 | 4.56092  | 0.15660  |
| H | -0.36272 | 4.96150  | 1.10139  |
| H | -0.14705 | 4.98890  | -0.65236 |
| H | -1.77719 | 4.92424  | 0.03751  |
| C | 1.25011  | 0.00958  | 0.31436  |
| C | 1.06066  | -1.23999 | 0.94140  |
| C | 2.51578  | 0.30575  | -0.21318 |
| C | 2.10928  | -2.14995 | 1.01393  |
| H | 0.10504  | -1.47681 | 1.39398  |
| C | 3.57068  | -0.60931 | -0.12074 |
| H | 2.69826  | 1.24212  | -0.73130 |
| C | 3.37177  | -1.85294 | 0.49108  |
| H | 1.95370  | -3.10860 | 1.50117  |
| H | 4.17239  | -2.57813 | 0.56698  |
| O | 4.75195  | -0.20069 | -0.67135 |
| C | 5.85478  | -1.10024 | -0.62448 |
| H | 6.13384  | -1.33678 | 0.40936  |
| H | 5.63422  | -2.03076 | -1.16130 |
| H | 6.68182  | -0.58525 | -1.11495 |
| C | -1.21380 | 0.83447  | 0.08157  |

|   |          |          |          |
|---|----------|----------|----------|
| C | -1.97544 | -0.45706 | -0.05579 |
| H | -1.29682 | -1.24713 | -0.40087 |
| H | -2.33745 | -0.78813 | 0.92866  |
| C | -3.16634 | -0.36988 | -1.02210 |
| H | -3.89649 | 0.35469  | -0.64106 |
| H | -2.81422 | 0.03129  | -1.98116 |
| C | -3.85636 | -1.71897 | -1.26981 |
| H | -4.67082 | -1.56772 | -1.99221 |
| H | -3.14058 | -2.40063 | -1.75060 |
| C | -4.42812 | -2.40480 | -0.01873 |
| H | -4.88973 | -3.35292 | -0.32459 |
| H | -3.61169 | -2.67424 | 0.66389  |
| C | -5.46185 | -1.56110 | 0.73327  |
| H | -5.01639 | -0.64868 | 1.14547  |
| H | -6.28082 | -1.25843 | 0.06867  |
| H | -5.89736 | -2.12169 | 1.56807  |
| H | -2.81181 | 2.40318  | -0.09716 |

4e\_conformer-179

|   |          |          |          |
|---|----------|----------|----------|
| C | 0.73764  | 3.06728  | 0.13360  |
| C | -0.16543 | 0.98490  | 0.22651  |
| N | -0.42650 | 2.34793  | 0.23686  |
| H | -1.33454 | 2.75000  | 0.42065  |
| C | 1.76726  | 2.14952  | 0.02508  |
| C | 0.75321  | 4.56086  | 0.15631  |
| H | 0.14747  | 4.98876  | -0.65277 |
| H | 0.36297  | 4.96161  | 1.10101  |
| H | 1.77754  | 4.92409  | 0.03726  |
| C | -1.25015 | 0.00969  | 0.31462  |
| C | -1.06097 | -1.23962 | 0.94225  |
| C | -2.51565 | 0.30573  | -0.21341 |
| C | -2.10967 | -2.14948 | 1.01487  |
| H | -0.10549 | -1.47630 | 1.39521  |
| C | -3.57063 | -0.60922 | -0.12088 |
| H | -2.69790 | 1.24190  | -0.73196 |
| C | -3.37199 | -1.85261 | 0.49153  |
| H | -1.95430 | -3.10793 | 1.50256  |
| H | -4.17268 | -2.57771 | 0.56751  |
| O | -4.75173 | -0.20076 | -0.67200 |
| C | -5.85463 | -1.10021 | -0.62505 |
| H | -6.13400 | -1.33630 | 0.40880  |
| H | -6.68149 | -0.58537 | -1.11598 |
| H | -5.63397 | -2.03098 | -1.16142 |
| C | 1.21385  | 0.83436  | 0.08191  |
| C | 1.97541  | -0.45724 | -0.05524 |



|   |         |          |          |
|---|---------|----------|----------|
| H | 2.33807 | -0.78776 | 0.92916  |
| H | 1.29660 | -1.24750 | -0.39947 |
| C | 3.16569 | -0.37053 | -1.02237 |
| H | 2.81291 | 0.03004  | -1.98144 |
| H | 3.89602 | 0.35434  | -0.64224 |
| C | 3.85568 | -1.71970 | -1.26973 |
| H | 3.13966 | -2.40171 | -1.74967 |
| H | 4.66967 | -1.56880 | -1.99274 |
| C | 4.42830 | -2.40475 | -0.01861 |
| H | 3.61232 | -2.67386 | 0.66468  |
| H | 4.88980 | -3.35300 | -0.32421 |
| C | 5.46243 | -1.56051 | 0.73223  |
| H | 6.28096 | -1.25817 | 0.06696  |
| H | 5.01715 | -0.64789 | 1.14417  |
| H | 5.89850 | -2.12057 | 1.56710  |
| H | 2.81200 | 2.40293  | -0.09688 |

#### 4e\_conformer-180

|   |          |          |          |
|---|----------|----------|----------|
| C | -0.46548 | 2.86706  | -0.09155 |
| C | 0.26474  | 0.72130  | 0.09849  |
| N | 0.56962  | 2.00150  | -0.34404 |
| H | 1.38831  | 2.23325  | -0.88811 |
| C | -1.44665 | 2.13629  | 0.55337  |
| C | -0.41855 | 4.30236  | -0.50235 |
| H | -1.32257 | 4.81586  | -0.16419 |
| H | 0.44663  | 4.82278  | -0.07218 |
| H | -0.35694 | 4.41558  | -1.59267 |
| C | 1.24285  | -0.35978 | -0.01179 |
| C | 0.84794  | -1.70025 | -0.15380 |
| C | 2.62195  | -0.05906 | 0.01957  |
| C | 1.80894  | -2.70857 | -0.25015 |
| H | -0.20303 | -1.95106 | -0.22033 |
| C | 3.57343  | -1.07403 | -0.09579 |
| H | 2.93491  | 0.96645  | 0.17112  |
| C | 3.16664  | -2.41065 | -0.22664 |
| H | 1.49118  | -3.74162 | -0.36116 |
| H | 3.92228  | -3.18521 | -0.30805 |
| O | 4.92279  | -0.86595 | -0.07567 |
| C | 5.39170  | 0.47273  | 0.04738  |
| H | 5.07482  | 0.92164  | 0.99654  |
| H | 6.48041  | 0.41203  | 0.02064  |
| H | 5.03953  | 1.09681  | -0.78288 |
| C | -1.00476 | 0.78429  | 0.67646  |
| C | -1.76002 | -0.32515 | 1.35420  |
| H | -1.05246 | -1.06319 | 1.74975  |

|   |          |          |          |
|---|----------|----------|----------|
| H | -2.29561 | 0.08552  | 2.22108  |
| C | -2.78551 | -1.05234 | 0.45770  |
| H | -2.27500 | -1.46250 | -0.42500 |
| H | -3.17909 | -1.91048 | 1.01699  |
| C | -3.94023 | -0.16159 | -0.01065 |
| H | -4.47508 | 0.22776  | 0.86892  |
| H | -3.52588 | 0.71112  | -0.52971 |
| C | -4.93849 | -0.86657 | -0.94009 |
| H | -5.65718 | -0.12452 | -1.31271 |
| H | -4.40273 | -1.24331 | -1.82312 |
| C | -5.70687 | -2.01671 | -0.28100 |
| H | -6.23875 | -1.66924 | 0.61374  |
| H | -6.44860 | -2.44092 | -0.96732 |
| H | -5.03875 | -2.82895 | 0.02557  |
| H | -2.38584 | 2.53331  | 0.91659  |

#### 4e\_conformer-181

|   |          |          |          |
|---|----------|----------|----------|
| C | -2.03811 | -2.23288 | -0.44805 |
| C | -0.45946 | -0.64932 | -0.86683 |
| N | -0.69746 | -1.93957 | -0.41385 |
| H | 0.02992  | -2.61408 | -0.22272 |
| C | -2.67951 | -1.09403 | -0.90291 |
| C | -2.56801 | -3.57527 | -0.06312 |
| H | -3.66057 | -3.56962 | -0.10396 |
| H | -2.21196 | -4.36697 | -0.73549 |
| H | -2.26966 | -3.85516 | 0.95515  |
| C | 0.89340  | -0.09653 | -0.86457 |
| C | 1.29767  | 0.84859  | -1.82082 |
| C | 1.82039  | -0.51746 | 0.11164  |
| C | 2.59440  | 1.36340  | -1.79229 |
| H | 0.60583  | 1.16327  | -2.59341 |
| C | 3.12006  | -0.00594 | 0.12165  |
| H | 1.50025  | -1.21502 | 0.87558  |
| C | 3.51127  | 0.94368  | -0.83388 |
| H | 2.89798  | 2.09415  | -2.53681 |
| H | 4.52347  | 1.33374  | -0.80420 |
| O | 4.07462  | -0.35799 | 1.03233  |
| C | 3.72802  | -1.31529 | 2.02759  |
| H | 2.91363  | -0.95106 | 2.66559  |
| H | 3.43406  | -2.27107 | 1.57715  |
| H | 4.62546  | -1.45818 | 2.63081  |
| C | -1.70183 | -0.09108 | -1.16842 |
| C | -2.01859 | 1.32985  | -1.55334 |
| H | -1.56951 | 1.58235  | -2.52319 |
| H | -3.10359 | 1.40517  | -1.70252 |

|   |          |          |          |
|---|----------|----------|----------|
| C | -1.59215 | 2.40539  | -0.53264 |
| H | -0.50233 | 2.38173  | -0.41138 |
| H | -1.83094 | 3.38326  | -0.97213 |
| C | -2.25874 | 2.31361  | 0.84981  |
| H | -2.15235 | 3.28966  | 1.34524  |
| H | -3.34086 | 2.15675  | 0.72448  |
| C | -1.69679 | 1.24076  | 1.79377  |
| H | -1.88911 | 0.24480  | 1.38481  |
| H | -0.60384 | 1.34600  | 1.84369  |
| C | -2.28910 | 1.33941  | 3.20214  |
| H | -3.37903 | 1.21321  | 3.18022  |
| H | -1.87869 | 0.56904  | 3.86544  |
| H | -2.08001 | 2.31716  | 3.65448  |
| H | -3.75035 | -0.97954 | -1.01681 |

4e\_conformer-182

|   |          |          |          |
|---|----------|----------|----------|
| C | 2.03775  | -2.23314 | -0.44794 |
| C | 0.45921  | -0.64948 | -0.86678 |
| N | 0.69712  | -1.93972 | -0.41370 |
| H | -0.03029 | -2.61414 | -0.22245 |
| C | 2.67923  | -1.09439 | -0.90294 |
| C | 2.56755  | -3.57553 | -0.06289 |
| H | 2.26923  | -3.85530 | 0.95543  |
| H | 2.21140  | -4.36727 | -0.73516 |
| H | 3.66011  | -3.56999 | -0.10378 |
| C | -0.89361 | -0.09658 | -0.86452 |
| C | -1.29791 | 0.84839  | -1.82089 |
| C | -1.82055 | -0.51728 | 0.11184  |
| C | -2.59460 | 1.36329  | -1.79235 |
| H | -0.60613 | 1.16290  | -2.59361 |
| C | -3.12018 | -0.00568 | 0.12188  |
| H | -1.50039 | -1.21474 | 0.87587  |
| C | -3.51142 | 0.94381  | -0.83378 |
| H | -2.89820 | 2.09393  | -2.53696 |
| H | -4.52359 | 1.33394  | -0.80408 |
| O | -4.07469 | -0.35752 | 1.03269  |
| C | -3.72807 | -1.31469 | 2.02807  |
| H | -3.43420 | -2.27055 | 1.57775  |
| H | -2.91362 | -0.95041 | 2.66595  |
| H | -4.62547 | -1.45743 | 2.63138  |
| C | 1.70162  | -0.09138 | -1.16849 |
| C | 2.01850  | 1.32945  | -1.55366 |
| H | 3.10347  | 1.40459  | -1.70312 |
| H | 1.56922  | 1.58189  | -2.52343 |
| C | 1.59248  | 2.40519  | -0.53299 |

|   |         |          |          |
|---|---------|----------|----------|
| H | 1.83128 | 3.38296  | -0.97269 |
| H | 0.50268 | 2.38170  | -0.41143 |
| C | 2.25945 | 2.31350  | 0.84928  |
| H | 3.34146 | 2.15613  | 0.72366  |
| H | 2.15362 | 3.28971  | 1.34451  |
| C | 1.69732 | 1.24112  | 1.79367  |
| H | 0.60444 | 1.34695  | 1.84400  |
| H | 1.88894 | 0.24497  | 1.38483  |
| C | 2.29022 | 1.33973  | 3.20179  |
| H | 2.08185 | 2.31769  | 3.65400  |
| H | 1.87965 | 0.56973  | 3.86540  |
| H | 3.38008 | 1.21292  | 3.17947  |
| H | 3.75007 | -0.98001 | -1.01691 |

4e\_conformer-183

|   |          |          |          |
|---|----------|----------|----------|
| C | 2.91868  | -1.86074 | -0.28568 |
| C | 0.80883  | -1.10595 | 0.10542  |
| N | 1.58058  | -2.13253 | -0.42414 |
| H | 1.20372  | -2.90391 | -0.95637 |
| C | 3.01262  | -0.65148 | 0.37789  |
| C | 3.97456  | -2.77420 | -0.81699 |
| H | 3.88807  | -3.78547 | -0.39962 |
| H | 3.92461  | -2.86821 | -1.90973 |
| H | 4.96452  | -2.38774 | -0.56014 |
| C | -0.65242 | -1.22491 | 0.11426  |
| C | -1.25431 | -2.49297 | 0.26883  |
| C | -1.48751 | -0.11195 | -0.04633 |
| C | -2.63857 | -2.61916 | 0.26157  |
| H | -0.63301 | -3.36952 | 0.42321  |
| C | -2.88110 | -0.24416 | -0.03551 |
| H | -1.07694 | 0.87592  | -0.21121 |
| C | -3.47035 | -1.50474 | 0.11547  |
| H | -3.08837 | -3.60043 | 0.38530  |
| H | -4.54618 | -1.62812 | 0.12016  |
| O | -3.57816 | 0.91922  | -0.19770 |
| C | -4.99980 | 0.84512  | -0.22493 |
| H | -5.39763 | 0.45261  | 0.71864  |
| H | -5.34993 | 1.86811  | -0.36866 |
| H | -5.35116 | 0.21881  | -1.05381 |
| C | 1.69385  | -0.16230 | 0.62755  |
| C | 1.36721  | 1.08017  | 1.41303  |
| H | 0.31305  | 1.33826  | 1.28635  |
| H | 1.49028  | 0.87632  | 2.48731  |
| C | 2.24511  | 2.29999  | 1.06994  |
| H | 1.88860  | 3.15131  | 1.66353  |

|   |          |          |          |
|---|----------|----------|----------|
| H | 3.27199  | 2.10861  | 1.40776  |
| C | 2.29274  | 2.68320  | -0.41676 |
| H | 2.89313  | 3.59854  | -0.51647 |
| H | 2.82645  | 1.89957  | -0.96822 |
| C | 0.92874  | 2.90372  | -1.08537 |
| H | 1.09726  | 3.20294  | -2.12838 |
| H | 0.39439  | 1.94726  | -1.13433 |
| C | 0.04929  | 3.95185  | -0.39791 |
| H | 0.56756  | 4.91655  | -0.33016 |
| H | -0.88287 | 4.11014  | -0.95203 |
| H | -0.22015 | 3.65032  | 0.62059  |
| H | 3.93836  | -0.16690 | 0.66005  |

4e\_conformer-184

|   |          |          |          |
|---|----------|----------|----------|
| C | -2.14048 | -2.22111 | -0.35398 |
| C | -0.60103 | -0.59742 | -0.76804 |
| N | -0.80213 | -1.91958 | -0.39372 |
| H | -0.06161 | -2.60142 | -0.30900 |
| C | -2.81685 | -1.05853 | -0.67871 |
| C | -2.63682 | -3.59112 | -0.02596 |
| H | -3.72987 | -3.59524 | -0.00269 |
| H | -2.31460 | -4.33398 | -0.76749 |
| H | -2.27697 | -3.93199 | 0.95311  |
| C | 0.75000  | -0.04580 | -0.85039 |
| C | 1.06628  | 0.98569  | -1.74884 |
| C | 1.76754  | -0.55656 | -0.01689 |
| C | 2.36431  | 1.49543  | -1.80265 |
| H | 0.30532  | 1.37301  | -2.41566 |
| C | 3.06554  | -0.04654 | -0.08751 |
| H | 1.51989  | -1.32068 | 0.70918  |
| C | 3.36850  | 0.98870  | -0.98442 |
| H | 2.59805  | 2.29325  | -2.50214 |
| H | 4.38168  | 1.37573  | -1.01883 |
| O | 4.10170  | -0.48090 | 0.68832  |
| C | 3.84267  | -1.51744 | 1.62942  |
| H | 4.79264  | -1.71290 | 2.12842  |
| H | 3.09766  | -1.20539 | 2.37143  |
| H | 3.49614  | -2.43134 | 1.13189  |
| C | -1.86460 | -0.02959 | -0.93847 |
| C | -2.21628 | 1.40645  | -1.22742 |
| H | -1.82698 | 1.70870  | -2.20864 |
| H | -3.30869 | 1.47693  | -1.31155 |
| C | -1.74109 | 2.43883  | -0.18360 |
| H | -0.65336 | 2.37103  | -0.07148 |
| H | -1.94079 | 3.43632  | -0.59768 |

|   |          |          |          |
|---|----------|----------|----------|
| C | -2.42466 | 2.35038  | 1.19156  |
| H | -2.23616 | 3.29286  | 1.72615  |
| H | -3.51268 | 2.30167  | 1.03894  |
| C | -1.99704 | 1.19208  | 2.10916  |
| H | -2.61123 | 1.23873  | 3.01945  |
| H | -2.22248 | 0.23372  | 1.63138  |
| C | -0.51836 | 1.23050  | 2.50597  |
| H | -0.26303 | 2.18399  | 2.98656  |
| H | -0.28023 | 0.42679  | 3.21292  |
| H | 0.13629  | 1.10626  | 1.63838  |
| H | -3.89344 | -0.94558 | -0.70853 |

4e\_conformer-185

|   |          |          |          |
|---|----------|----------|----------|
| C | 2.14010  | -2.22133 | -0.35415 |
| C | 0.60088  | -0.59735 | -0.76799 |
| N | 0.80179  | -1.91957 | -0.39377 |
| H | 0.06117  | -2.60131 | -0.30906 |
| C | 2.81663  | -1.05884 | -0.67887 |
| C | 2.63623  | -3.59144 | -0.02625 |
| H | 2.27640  | -3.93231 | 0.95283  |
| H | 2.31384  | -4.33420 | -0.76780 |
| H | 3.72928  | -3.59574 | -0.00307 |
| C | -0.75009 | -0.04558 | -0.85026 |
| C | -1.06628 | 0.98609  | -1.74854 |
| C | -1.76769 | -0.55639 | -0.01686 |
| C | -2.36427 | 1.49594  | -1.80229 |
| H | -0.30528 | 1.37347  | -2.41528 |
| C | -3.06565 | -0.04627 | -0.08742 |
| H | -1.52012 | -1.32066 | 0.70909  |
| C | -3.36852 | 0.98915  | -0.98416 |
| H | -2.59794 | 2.29389  | -2.50165 |
| H | -4.38167 | 1.37626  | -1.01853 |
| O | -4.10185 | -0.48068 | 0.68831  |
| C | -3.84292 | -1.51741 | 1.62924  |
| H | -3.49646 | -2.43125 | 1.13156  |
| H | -3.09791 | -1.20554 | 2.37132  |
| H | -4.79292 | -1.71287 | 2.12818  |
| C | 1.86453  | -0.02973 | -0.93849 |
| C | 2.21646  | 1.40626  | -1.22742 |
| H | 3.30889  | 1.47653  | -1.31157 |
| H | 1.82721  | 1.70858  | -2.20864 |
| C | 1.74148  | 2.43872  | -0.18359 |
| H | 1.94128  | 3.43617  | -0.59770 |
| H | 0.65375  | 2.37107  | -0.07139 |
| C | 2.42515  | 2.35023  | 1.19152  |

|   |          |          |          |
|---|----------|----------|----------|
| H | 3.51316  | 2.30158  | 1.03882  |
| H | 2.23664  | 3.29268  | 1.72616  |
| C | 1.99765  | 1.19188  | 2.10911  |
| H | 2.22319  | 0.23354  | 1.63133  |
| H | 2.61185  | 1.23859  | 3.01939  |
| C | 0.51898  | 1.23013  | 2.50593  |
| H | 0.26353  | 2.18361  | 2.98648  |
| H | -0.13566 | 1.10576  | 1.63836  |
| H | 0.28095  | 0.42642  | 3.21292  |
| H | 3.89324  | -0.94607 | -0.70876 |

4e\_conformer-186

|   |          |          |          |
|---|----------|----------|----------|
| C | -0.77659 | 2.64238  | -0.14996 |
| C | 0.19276  | 0.58688  | -0.06962 |
| N | 0.38642  | 1.93635  | -0.33238 |
| H | 1.23397  | 2.32176  | -0.72369 |
| C | -1.73226 | 1.73437  | 0.26810  |
| C | -0.86202 | 4.11174  | -0.40442 |
| H | -1.86551 | 4.47316  | -0.16418 |
| H | -0.14496 | 4.67511  | 0.20622  |
| H | -0.65922 | 4.35886  | -1.45472 |
| C | 1.30756  | -0.35613 | -0.14619 |
| C | 1.11213  | -1.70209 | -0.49677 |
| C | 2.61805  | 0.08910  | 0.13148  |
| C | 2.19886  | -2.57691 | -0.55476 |
| H | 0.12175  | -2.05605 | -0.75398 |
| C | 3.69909  | -0.79062 | 0.05219  |
| H | 2.77138  | 1.11492  | 0.44254  |
| C | 3.49004  | -2.13591 | -0.28788 |
| H | 2.03571  | -3.61564 | -0.82842 |
| H | 4.34300  | -2.80494 | -0.33724 |
| O | 4.99410  | -0.43821 | 0.30354  |
| C | 5.26438  | 0.91775  | 0.64343  |
| H | 6.34464  | 0.98242  | 0.77963  |
| H | 4.95518  | 1.59931  | -0.15828 |
| H | 4.76164  | 1.20426  | 1.57511  |
| C | -1.13928 | 0.43629  | 0.32055  |
| C | -1.82383 | -0.82573 | 0.76742  |
| H | -1.07862 | -1.53059 | 1.15354  |
| H | -2.48878 | -0.59471 | 1.60926  |
| C | -2.64214 | -1.53544 | -0.33344 |
| H | -1.97333 | -1.79196 | -1.16538 |
| H | -3.01050 | -2.48801 | 0.06870  |
| C | -3.81568 | -0.72019 | -0.89584 |
| H | -3.42311 | 0.19106  | -1.36386 |

|   |          |          |          |
|---|----------|----------|----------|
| H | -4.28831 | -1.30295 | -1.69901 |
| C | -4.89414 | -0.32949 | 0.12645  |
| H | -4.46422 | 0.33261  | 0.88910  |
| H | -5.65963 | 0.26478  | -0.38983 |
| C | -5.56337 | -1.52314 | 0.81461  |
| H | -4.85252 | -2.08674 | 1.42906  |
| H | -6.37815 | -1.19537 | 1.47009  |
| H | -5.98503 | -2.21660 | 0.07612  |
| H | -2.75443 | 1.97934  | 0.52565  |

4e\_conformer-187

|   |          |          |          |
|---|----------|----------|----------|
| C | 3.65781  | 0.62813  | 0.18593  |
| C | 1.59993  | -0.30370 | -0.07052 |
| N | 2.94342  | -0.54488 | 0.18135  |
| H | 3.31703  | -1.44590 | 0.44356  |
| C | 2.76103  | 1.64192  | -0.09794 |
| C | 5.12440  | 0.66348  | 0.46763  |
| H | 5.35754  | 0.30144  | 1.47754  |
| H | 5.69174  | 0.04389  | -0.23856 |
| H | 5.49400  | 1.68928  | 0.38721  |
| C | 0.64427  | -1.40785 | -0.14880 |
| C | 1.04593  | -2.66533 | -0.63185 |
| C | -0.68884 | -1.23561 | 0.27591  |
| C | 0.13474  | -3.72091 | -0.68671 |
| H | 2.06015  | -2.80799 | -0.99167 |
| C | -1.59438 | -2.29741 | 0.20756  |
| H | -0.98880 | -0.28356 | 0.69093  |
| C | -1.18247 | -3.54859 | -0.27553 |
| H | 0.45426  | -4.68788 | -1.06517 |
| H | -1.90195 | -4.36005 | -0.31374 |
| O | -2.89690 | -2.22123 | 0.60977  |
| C | -3.36502 | -0.98236 | 1.13239  |
| H | -3.29735 | -0.18474 | 0.38492  |
| H | -4.41082 | -1.14464 | 1.39641  |
| H | -2.80404 | -0.68753 | 2.02749  |
| C | 1.46343  | 1.07046  | -0.26264 |
| C | 0.21873  | 1.83024  | -0.62496 |
| H | 0.46757  | 2.58845  | -1.38024 |
| H | -0.49939 | 1.15365  | -1.09489 |
| C | -0.42449 | 2.54996  | 0.57778  |
| H | -0.75605 | 1.80839  | 1.31891  |
| H | 0.36541  | 3.12997  | 1.07272  |
| C | -1.58832 | 3.49815  | 0.24301  |
| H | -1.70532 | 4.19215  | 1.08587  |
| H | -1.31181 | 4.11826  | -0.62269 |



|   |          |         |          |
|---|----------|---------|----------|
| C | -2.96029 | 2.85188 | -0.01322 |
| H | -3.20294 | 2.18700 | 0.82810  |
| H | -3.71559 | 3.64880 | 0.00793  |
| C | -3.11100 | 2.08719 | -1.33324 |
| H | -2.79783 | 2.70625 | -2.18283 |
| H | -2.51330 | 1.17115 | -1.35578 |
| H | -4.15581 | 1.79870 | -1.49720 |
| H | 3.01185  | 2.69095 | -0.19523 |

4e\_conformer-188

|   |          |          |          |
|---|----------|----------|----------|
| C | -2.71478 | -1.80893 | -0.50477 |
| C | -0.64346 | -0.88759 | -0.34814 |
| N | -1.44748 | -1.96336 | 0.00229  |
| H | -1.10556 | -2.80141 | 0.45050  |
| C | -2.73481 | -0.59362 | -1.16366 |
| C | -3.77508 | -2.84485 | -0.32021 |
| H | -3.50284 | -3.80045 | -0.78729 |
| H | -3.96906 | -3.04557 | 0.74117  |
| H | -4.70997 | -2.50540 | -0.77422 |
| C | 0.74201  | -0.81103 | 0.11631  |
| C | 1.08836  | -1.27083 | 1.40479  |
| C | 1.75154  | -0.28920 | -0.70204 |
| C | 2.40574  | -1.19531 | 1.84200  |
| H | 0.31700  | -1.65680 | 2.06396  |
| C | 3.07303  | -0.19949 | -0.24743 |
| H | 1.53281  | 0.03050  | -1.71449 |
| C | 3.41078  | -0.65745 | 1.03182  |
| H | 2.66297  | -1.54739 | 2.83716  |
| H | 4.42824  | -0.60350 | 1.39865  |
| O | 3.96314  | 0.33358  | -1.13526 |
| C | 5.32716  | 0.42540  | -0.73697 |
| H | 5.74707  | -0.56413 | -0.51960 |
| H | 5.85644  | 0.86701  | -1.58229 |
| H | 5.44391  | 1.06909  | 0.14319  |
| C | -1.43837 | 0.00035  | -1.06764 |
| C | -1.08265 | 1.37333  | -1.57124 |
| H | -0.01996 | 1.57664  | -1.40263 |
| H | -1.22732 | 1.39940  | -2.66039 |
| C | -1.91176 | 2.52021  | -0.94727 |
| H | -1.92098 | 3.36107  | -1.65323 |
| H | -2.95552 | 2.19950  | -0.84347 |
| C | -1.38190 | 3.05240  | 0.39439  |
| H | -0.36883 | 3.44750  | 0.23073  |
| H | -2.00030 | 3.91345  | 0.68782  |
| C | -1.33490 | 2.06312  | 1.56887  |

|   |          |          |          |
|---|----------|----------|----------|
| H | -0.63792 | 1.24991  | 1.34210  |
| H | -0.91754 | 2.59160  | 2.43740  |
| C | -2.69582 | 1.47294  | 1.94775  |
| H | -3.09670 | 0.85072  | 1.14169  |
| H | -2.61495 | 0.84528  | 2.84320  |
| H | -3.42486 | 2.26562  | 2.16110  |
| H | -3.59943 | -0.16446 | -1.65438 |

4e\_conformer-189

|   |          |          |          |
|---|----------|----------|----------|
| C | 2.72542  | -2.11480 | -0.24012 |
| C | 0.93158  | -0.89984 | 0.44181  |
| N | 1.35606  | -2.09452 | -0.12029 |
| H | 0.75041  | -2.88433 | -0.29312 |
| C | 3.18487  | -0.89586 | 0.22324  |
| C | 3.45692  | -3.30370 | -0.77242 |
| H | 3.31302  | -4.19148 | -0.14265 |
| H | 3.12637  | -3.56715 | -1.78531 |
| H | 4.52911  | -3.09345 | -0.81300 |
| C | -0.49185 | -0.62290 | 0.64495  |
| C | -0.95046 | 0.01236  | 1.81578  |
| C | -1.42663 | -0.98657 | -0.33302 |
| C | -2.30305 | 0.29186  | 1.97142  |
| H | -0.24562 | 0.26459  | 2.60008  |
| C | -2.79020 | -0.71639 | -0.16218 |
| H | -1.10593 | -1.45828 | -1.25674 |
| C | -3.23713 | -0.06415 | 0.99322  |
| H | -2.64956 | 0.78493  | 2.87543  |
| H | -4.28589 | 0.16141  | 1.14149  |
| O | -3.60129 | -1.11636 | -1.18513 |
| C | -4.99420 | -0.84044 | -1.07712 |
| H | -5.43449 | -1.34202 | -0.20697 |
| H | -5.18307 | 0.23757  | -1.00719 |
| H | -5.44792 | -1.23049 | -1.98910 |
| C | 2.06480  | -0.12070 | 0.65697  |
| C | 2.11157  | 1.31592  | 1.09820  |
| H | 1.12718  | 1.62586  | 1.45401  |
| H | 2.79664  | 1.42346  | 1.95084  |
| C | 2.58697  | 2.26949  | -0.02219 |
| H | 2.67265  | 3.28610  | 0.38718  |
| H | 3.60350  | 1.96814  | -0.30536 |
| C | 1.70642  | 2.29555  | -1.28646 |
| H | 2.34476  | 2.53289  | -2.14771 |
| H | 1.31152  | 1.28727  | -1.46994 |
| C | 0.54818  | 3.30673  | -1.28028 |
| H | 0.95766  | 4.31453  | -1.11936 |

|   |          |          |          |
|---|----------|----------|----------|
| H | 0.10297  | 3.31850  | -2.28482 |
| C | -0.56185 | 3.04203  | -0.25834 |
| H | -0.96252 | 2.02781  | -0.36005 |
| H | -0.20349 | 3.15158  | 0.77021  |
| H | -1.38967 | 3.74859  | -0.39315 |
| H | 4.22215  | -0.58513 | 0.23752  |

4e\_conformer-190

|   |          |          |          |
|---|----------|----------|----------|
| C | -2.21243 | -2.38282 | -0.22707 |
| C | -0.61557 | -0.92201 | 0.46345  |
| N | -0.86226 | -2.14736 | -0.13936 |
| H | -0.14531 | -2.82312 | -0.36171 |
| C | -2.84686 | -1.27366 | 0.30153  |
| C | -2.76133 | -3.64950 | -0.79785 |
| H | -3.85414 | -3.61584 | -0.79586 |
| H | -2.43070 | -3.80887 | -1.83218 |
| H | -2.45192 | -4.52941 | -0.21869 |
| C | 0.75172  | -0.44002 | 0.65176  |
| C | 1.11033  | 0.31518  | 1.78715  |
| C | 1.73878  | -0.72442 | -0.30211 |
| C | 2.41284  | 0.78006  | 1.93153  |
| H | 0.37422  | 0.50889  | 2.55880  |
| C | 3.05167  | -0.26681 | -0.14124 |
| H | 1.49613  | -1.27730 | -1.20427 |
| C | 3.39716  | 0.49899  | 0.97903  |
| H | 2.68058  | 1.36152  | 2.80944  |
| H | 4.40517  | 0.86926  | 1.11881  |
| O | 3.91861  | -0.60681 | -1.14016 |
| C | 5.26191  | -0.14469 | -1.04178 |
| H | 5.30695  | 0.95095  | -1.02668 |
| H | 5.75556  | -0.53931 | -0.14558 |
| H | 5.77220  | -0.51707 | -1.93099 |
| C | -1.85325 | -0.34443 | 0.73996  |
| C | -2.11983 | 1.02617  | 1.30170  |
| H | -2.46472 | 0.94678  | 2.34367  |
| H | -1.18853 | 1.59675  | 1.34314  |
| C | -3.18068 | 1.82145  | 0.51585  |
| H | -4.14242 | 1.29906  | 0.60542  |
| H | -3.31796 | 2.79429  | 1.00834  |
| C | -2.89918 | 2.05201  | -0.97720 |
| H | -2.73492 | 1.08422  | -1.46936 |
| H | -3.81692 | 2.46507  | -1.41686 |
| C | -1.73678 | 3.00370  | -1.31963 |
| H | -1.91991 | 3.41673  | -2.32075 |
| H | -1.75786 | 3.86271  | -0.63325 |

|   |          |          |          |
|---|----------|----------|----------|
| C | -0.33832 | 2.37493  | -1.31701 |
| H | -0.30775 | 1.48859  | -1.96188 |
| H | 0.40694  | 3.08676  | -1.69225 |
| H | -0.01936 | 2.05843  | -0.32175 |
| H | -3.91946 | -1.13789 | 0.35268  |

4e\_conformer-191

|   |          |          |          |
|---|----------|----------|----------|
| C | -3.26274 | -1.51076 | -0.15337 |
| C | -1.07477 | -0.90052 | -0.17028 |
| N | -1.99746 | -1.83590 | 0.27436  |
| H | -1.74996 | -2.69937 | 0.73650  |
| C | -3.15408 | -0.32608 | -0.85775 |
| C | -4.44577 | -2.37353 | 0.14302  |
| H | -5.35304 | -1.91028 | -0.25408 |
| H | -4.58563 | -2.51868 | 1.22188  |
| H | -4.35259 | -3.36964 | -0.30928 |
| C | 0.34024  | -1.00602 | 0.19035  |
| C | 0.71962  | -1.39948 | 1.49038  |
| C | 1.34231  | -0.70916 | -0.74040 |
| C | 2.06548  | -1.46715 | 1.83278  |
| H | -0.04400 | -1.61749 | 2.23068  |
| C | 2.69479  | -0.75886 | -0.38244 |
| H | 1.08791  | -0.44395 | -1.76033 |
| C | 3.06659  | -1.14210 | 0.91169  |
| H | 2.35075  | -1.76336 | 2.83846  |
| H | 4.10739  | -1.19268 | 1.20651  |
| O | 3.57593  | -0.42954 | -1.37240 |
| C | 4.96592  | -0.46955 | -1.06645 |
| H | 5.28257  | -1.47888 | -0.77701 |
| H | 5.48224  | -0.17527 | -1.98109 |
| H | 5.21797  | 0.23286  | -0.26283 |
| C | -1.78058 | 0.06935  | -0.87722 |
| C | -1.25195 | 1.36671  | -1.42364 |
| H | -0.16139 | 1.36990  | -1.38115 |
| H | -1.51955 | 1.46132  | -2.48543 |
| C | -1.80689 | 2.60120  | -0.67697 |
| H | -1.44713 | 3.51173  | -1.17688 |
| H | -2.89792 | 2.59906  | -0.79539 |
| C | -1.47066 | 2.67132  | 0.82494  |
| H | -2.27665 | 3.21601  | 1.33415  |
| H | -1.47969 | 1.65545  | 1.24250  |
| C | -0.14703 | 3.36427  | 1.18897  |
| H | -0.15629 | 4.38473  | 0.77937  |
| H | -0.11371 | 3.47782  | 2.28140  |
| C | 1.12904  | 2.64781  | 0.73564  |

|   |          |         |          |
|---|----------|---------|----------|
| H | 1.22019  | 2.62591 | -0.35503 |
| H | 2.01862  | 3.15536 | 1.12768  |
| H | 1.14853  | 1.61082 | 1.08733  |
| H | -3.98101 | 0.21152 | -1.30479 |

4e\_conformer-192

|   |          |          |          |
|---|----------|----------|----------|
| C | 3.26277  | -1.51072 | -0.15337 |
| C | 1.07480  | -0.90050 | -0.17028 |
| N | 1.99750  | -1.83588 | 0.27436  |
| H | 1.75002  | -2.69935 | 0.73650  |
| C | 3.15410  | -0.32603 | -0.85775 |
| C | 4.44582  | -2.37348 | 0.14302  |
| H | 4.35266  | -3.36958 | -0.30931 |
| H | 5.35308  | -1.91020 | -0.25407 |
| H | 4.58567  | -2.51865 | 1.22187  |
| C | -0.34021 | -1.00602 | 0.19036  |
| C | -0.71959 | -1.39948 | 1.49039  |
| C | -1.34228 | -0.70918 | -0.74040 |
| C | -2.06544 | -1.46717 | 1.83279  |
| H | 0.04404  | -1.61747 | 2.23069  |
| C | -2.69476 | -0.75891 | -0.38244 |
| H | -1.08789 | -0.44397 | -1.76033 |
| C | -3.06655 | -1.14215 | 0.91169  |
| H | -2.35071 | -1.76338 | 2.83846  |
| H | -4.10735 | -1.19274 | 1.20651  |
| O | -3.57591 | -0.42960 | -1.37240 |
| C | -4.96590 | -0.46964 | -1.06645 |
| H | -5.21795 | 0.23277  | -0.26283 |
| H | -5.48222 | -0.17537 | -1.98109 |
| H | -5.28253 | -1.47897 | -0.77701 |
| C | 1.78059  | 0.06938  | -0.87721 |
| C | 1.25195  | 1.36673  | -1.42363 |
| H | 1.51959  | 1.46137  | -2.48540 |
| H | 0.16139  | 1.36990  | -1.38117 |
| C | 1.80684  | 2.60122  | -0.67692 |
| H | 2.89788  | 2.59910  | -0.79530 |
| H | 1.44708  | 3.51175  | -1.17684 |
| C | 1.47055  | 2.67131  | 0.82498  |
| H | 1.47954  | 1.65544  | 1.24252  |
| H | 2.27652  | 3.21598  | 1.33424  |
| C | 0.14691  | 3.36427  | 1.18895  |
| H | 0.11353  | 3.47779  | 2.28139  |
| H | 0.15621  | 4.38475  | 0.77939  |
| C | -1.12914 | 2.64785  | 0.73554  |
| H | -1.22023 | 2.62598  | -0.35514 |

|   |          |         |          |
|---|----------|---------|----------|
| H | -1.14868 | 1.61085 | 1.08720  |
| H | -2.01874 | 3.15541 | 1.12753  |
| H | 3.98103  | 0.21158 | -1.30478 |

4e\_conformer-193

|   |          |          |          |
|---|----------|----------|----------|
| C | 0.33098  | 3.17840  | -0.16962 |
| C | -0.20766 | 0.98505  | -0.45076 |
| N | -0.69209 | 2.26546  | -0.21730 |
| H | -1.67238 | 2.50869  | -0.21974 |
| C | 1.50407  | 2.46675  | -0.34801 |
| C | 0.08477  | 4.63828  | 0.02816  |
| H | 1.03665  | 5.17523  | 0.05862  |
| H | -0.51624 | 5.06736  | -0.78425 |
| H | -0.44654 | 4.84027  | 0.96701  |
| C | -1.12064 | -0.15522 | -0.51596 |
| C | -0.81604 | -1.29698 | -1.27559 |
| C | -2.34322 | -0.11675 | 0.18801  |
| C | -1.70814 | -2.36899 | -1.32076 |
| H | 0.10358  | -1.33783 | -1.84619 |
| C | -3.23529 | -1.18906 | 0.12254  |
| H | -2.56800 | 0.73948  | 0.81147  |
| C | -2.91660 | -2.32688 | -0.63348 |
| H | -1.46116 | -3.24611 | -1.91248 |
| H | -3.62004 | -3.15252 | -0.66504 |
| O | -4.43513 | -1.22780 | 0.77345  |
| C | -4.81273 | -0.09540 | 1.54944  |
| H | -5.79727 | -0.32730 | 1.95762  |
| H | -4.10868 | 0.07829  | 2.37227  |
| H | -4.87648 | 0.80858  | 0.93171  |
| C | 1.18351  | 1.08996  | -0.53107 |
| C | 2.20160  | -0.01016 | -0.67176 |
| H | 2.05281  | -0.57887 | -1.59968 |
| H | 3.18924  | 0.45537  | -0.76853 |
| C | 2.21358  | -0.98919 | 0.51602  |
| H | 2.45077  | -0.42935 | 1.42954  |
| H | 1.20279  | -1.38882 | 0.65663  |
| C | 3.18673  | -2.16315 | 0.34057  |
| H | 3.10986  | -2.81669 | 1.22107  |
| H | 2.86113  | -2.76585 | -0.51932 |
| C | 4.65969  | -1.77249 | 0.14206  |
| H | 5.24926  | -2.69091 | 0.02152  |
| H | 4.77336  | -1.21675 | -0.79791 |
| C | 5.24212  | -0.94763 | 1.29367  |
| H | 5.12495  | -1.47134 | 2.25077  |
| H | 6.31113  | -0.75891 | 1.14359  |

|   |         |         |          |
|---|---------|---------|----------|
| H | 4.74495 | 0.02454 | 1.38606  |
| H | 2.50158 | 2.88839 | -0.34194 |

4e\_conformer-194

|   |          |          |          |
|---|----------|----------|----------|
| C | 1.28365  | 2.55679  | 0.03831  |
| C | 0.13920  | 0.60482  | 0.26831  |
| N | 0.11664  | 1.89364  | -0.25044 |
| H | -0.60159 | 2.24025  | -0.87015 |
| C | 2.05918  | 1.69075  | 0.78685  |
| C | 1.54509  | 3.94749  | -0.44009 |
| H | 2.51519  | 4.29169  | -0.07166 |
| H | 1.56243  | 4.00727  | -1.53618 |
| H | 0.78063  | 4.65185  | -0.08810 |
| C | -1.01246 | -0.28185 | 0.09682  |
| C | -0.86071 | -1.66802 | -0.06908 |
| C | -2.31236 | 0.26683  | 0.07565  |
| C | -1.98361 | -2.48093 | -0.23664 |
| H | 0.12951  | -2.10389 | -0.09810 |
| C | -3.42658 | -0.55378 | -0.11086 |
| H | -2.43633 | 1.33032  | 0.23829  |
| C | -3.26382 | -1.93929 | -0.26237 |
| H | -1.85462 | -3.55199 | -0.36563 |
| H | -4.14310 | -2.56028 | -0.39971 |
| O | -4.71448 | -0.10189 | -0.14540 |
| C | -4.93615 | 1.29777  | -0.00666 |
| H | -6.01509 | 1.43867  | -0.08225 |
| H | -4.58800 | 1.66309  | 0.96706  |
| H | -4.43675 | 1.86176  | -0.80373 |
| C | 1.35428  | 0.45740  | 0.93483  |
| C | 1.83784  | -0.71217 | 1.74796  |
| H | 2.02301  | -0.36506 | 2.77467  |
| H | 1.05180  | -1.47114 | 1.82483  |
| C | 3.14014  | -1.37266 | 1.24744  |
| H | 3.90877  | -0.59971 | 1.12106  |
| H | 3.50404  | -2.03110 | 2.04736  |
| C | 3.02643  | -2.21322 | -0.03471 |
| H | 3.95947  | -2.78408 | -0.14800 |
| H | 2.23420  | -2.96288 | 0.10657  |
| C | 2.77182  | -1.45423 | -1.34770 |
| H | 2.69697  | -2.19464 | -2.15605 |
| H | 1.80507  | -0.94274 | -1.30539 |
| C | 3.86207  | -0.43798 | -1.69836 |
| H | 4.85418  | -0.90765 | -1.70668 |
| H | 3.68925  | -0.00470 | -2.69044 |
| H | 3.88293  | 0.38642  | -0.97867 |

|   |         |         |         |
|---|---------|---------|---------|
| H | 3.03337 | 1.92186 | 1.19902 |
|---|---------|---------|---------|

4e\_conformer-195

|   |          |          |          |
|---|----------|----------|----------|
| C | -1.28365 | 2.55679  | 0.03830  |
| C | -0.13919 | 0.60482  | 0.26830  |
| N | -0.11664 | 1.89365  | -0.25044 |
| H | 0.60159  | 2.24025  | -0.87015 |
| C | -2.05918 | 1.69076  | 0.78684  |
| C | -1.54509 | 3.94749  | -0.44009 |
| H | -0.78064 | 4.65185  | -0.08809 |
| H | -1.56242 | 4.00727  | -1.53618 |
| H | -2.51519 | 4.29169  | -0.07167 |
| C | 1.01246  | -0.28185 | 0.09682  |
| C | 0.86071  | -1.66801 | -0.06909 |
| C | 2.31236  | 0.26682  | 0.07566  |
| C | 1.98360  | -2.48093 | -0.23664 |
| H | -0.12951 | -2.10388 | -0.09811 |
| C | 3.42658  | -0.55379 | -0.11086 |
| H | 2.43633  | 1.33032  | 0.23830  |
| C | 3.26382  | -1.93929 | -0.26237 |
| H | 1.85461  | -3.55199 | -0.36564 |
| H | 4.14309  | -2.56028 | -0.39972 |
| O | 4.71448  | -0.10189 | -0.14539 |
| C | 4.93616  | 1.29777  | -0.00666 |
| H | 4.43675  | 1.86176  | -0.80372 |
| H | 4.58800  | 1.66308  | 0.96707  |
| H | 6.01510  | 1.43866  | -0.08224 |
| C | -1.35428 | 0.45740  | 0.93482  |
| C | -1.83784 | -0.71217 | 1.74796  |
| H | -1.05181 | -1.47115 | 1.82482  |
| H | -2.02300 | -0.36506 | 2.77467  |
| C | -3.14015 | -1.37266 | 1.24744  |
| H | -3.50405 | -2.03109 | 2.04736  |
| H | -3.90877 | -0.59969 | 1.12106  |
| C | -3.02645 | -2.21322 | -0.03470 |
| H | -2.23423 | -2.96290 | 0.10659  |
| H | -3.95950 | -2.78407 | -0.14799 |
| C | -2.77182 | -1.45424 | -1.34770 |
| H | -1.80506 | -0.94278 | -1.30538 |
| H | -2.69699 | -2.19466 | -2.15604 |
| C | -3.86205 | -0.43797 | -1.69836 |
| H | -4.85416 | -0.90762 | -1.70669 |
| H | -3.88289 | 0.38643  | -0.97867 |
| H | -3.68922 | -0.00470 | -2.69045 |
| H | -3.03337 | 1.92187  | 1.19902  |



## 4e\_conformer-196

|   |          |          |          |
|---|----------|----------|----------|
| C | -0.22570 | 3.20027  | -0.24962 |
| C | 0.15324  | 0.97355  | 0.01223  |
| N | 0.66591  | 2.17583  | -0.45629 |
| H | 1.51484  | 2.25316  | -0.99825 |
| C | -1.31781 | 2.65284  | 0.39635  |
| C | 0.05194  | 4.59696  | -0.70125 |
| H | 0.97835  | 4.99138  | -0.26465 |
| H | 0.15293  | 4.66337  | -1.79249 |
| H | -0.76805 | 5.25503  | -0.40139 |
| C | 0.94960  | -0.25246 | -0.07559 |
| C | 0.35797  | -1.49141 | -0.36327 |
| C | 2.34592  | -0.18991 | 0.11233  |
| C | 1.14410  | -2.64274 | -0.43995 |
| H | -0.70435 | -1.54589 | -0.55999 |
| C | 3.12549  | -1.34473 | 0.01430  |
| H | 2.80000  | 0.76074  | 0.36358  |
| C | 2.52108  | -2.58200 | -0.25610 |
| H | 0.67634  | -3.59756 | -0.66361 |
| H | 3.14426  | -3.46808 | -0.32103 |
| O | 4.48032  | -1.37147 | 0.18075  |
| C | 5.14508  | -0.14101 | 0.44835  |
| H | 4.80317  | 0.30082  | 1.39213  |
| H | 6.20555  | -0.38436 | 0.52476  |
| H | 4.99257  | 0.57973  | -0.36409 |
| C | -1.09388 | 1.25135  | 0.56888  |
| C | -2.01700 | 0.32547  | 1.31524  |
| H | -1.56477 | -0.66784 | 1.40587  |
| H | -2.13732 | 0.69750  | 2.34248  |
| C | -3.42038 | 0.21648  | 0.68188  |
| H | -4.09832 | -0.26650 | 1.39702  |
| H | -3.80982 | 1.23117  | 0.53192  |
| C | -3.44427 | -0.54111 | -0.65431 |
| H | -4.35677 | -0.28036 | -1.20780 |
| H | -2.60453 | -0.18948 | -1.26867 |
| C | -3.38444 | -2.07188 | -0.51504 |
| H | -3.14918 | -2.51089 | -1.49361 |
| H | -2.55895 | -2.35598 | 0.15094  |
| C | -4.68492 | -2.68981 | 0.00875  |
| H | -5.52375 | -2.45774 | -0.65902 |
| H | -4.60445 | -3.78039 | 0.08057  |
| H | -4.94065 | -2.31206 | 1.00511  |
| H | -2.18716 | 3.20596  | 0.72909  |

## 4e\_conformer-197

|   |          |          |          |
|---|----------|----------|----------|
| C | -2.27581 | 2.10197  | 0.15877  |
| C | -0.22574 | 1.12135  | 0.25754  |
| N | -0.96063 | 2.19761  | -0.22137 |
| H | -0.59526 | 2.89963  | -0.84844 |
| C | -2.38628 | 0.95395  | 0.92152  |
| C | -3.29755 | 3.11025  | -0.25380 |
| H | -3.03093 | 4.12244  | 0.07618  |
| H | -3.42119 | 3.14555  | -1.34406 |
| H | -4.26701 | 2.85786  | 0.18408  |
| C | 1.21497  | 1.04169  | 0.02703  |
| C | 1.98043  | 2.20869  | -0.14860 |
| C | 1.86541  | -0.20683 | -0.02650 |
| C | 3.35491  | 2.12136  | -0.37301 |
| H | 1.50982  | 3.18424  | -0.07703 |
| C | 3.24420  | -0.28148 | -0.23305 |
| H | 1.27780  | -1.10752 | 0.06255  |
| C | 3.99722  | 0.88806  | -0.41295 |
| H | 3.93549  | 3.03016  | -0.50500 |
| H | 5.06636  | 0.80715  | -0.58000 |
| O | 3.94267  | -1.45361 | -0.29125 |
| C | 3.22287  | -2.66808 | -0.10546 |
| H | 2.47078  | -2.81149 | -0.89090 |
| H | 3.96341  | -3.46685 | -0.16251 |
| H | 2.73040  | -2.69438 | 0.87416  |
| C | -1.10880 | 0.32051  | 0.98505  |
| C | -0.81507 | -0.94386 | 1.74516  |
| H | 0.21410  | -0.92286 | 2.12469  |
| H | -1.46777 | -0.96830 | 2.62779  |
| C | -1.02673 | -2.27080 | 0.97803  |
| H | -0.25649 | -2.38796 | 0.20384  |
| H | -0.86097 | -3.08649 | 1.69338  |
| C | -2.40959 | -2.42547 | 0.32001  |
| H | -2.69104 | -3.48728 | 0.30527  |
| H | -3.16725 | -1.92144 | 0.93648  |
| C | -2.47845 | -1.88721 | -1.11531 |
| H | -2.09737 | -0.86122 | -1.13893 |
| H | -1.80585 | -2.48434 | -1.74756 |
| C | -3.89537 | -1.92040 | -1.69095 |
| H | -4.30883 | -2.93678 | -1.67370 |
| H | -4.56705 | -1.27981 | -1.10592 |
| H | -3.91739 | -1.56776 | -2.72860 |
| H | -3.29440 | 0.60077  | 1.39294  |

## 4e\_conformer-198

|   |          |          |          |
|---|----------|----------|----------|
| C | 2.27582  | 2.10186  | 0.15895  |
| C | 0.22568  | 1.12136  | 0.25751  |
| N | 0.96066  | 2.19761  | -0.22127 |
| H | 0.59538  | 2.89970  | -0.84831 |
| C | 2.38616  | 0.95378  | 0.92162  |
| C | 3.29764  | 3.11013  | -0.25346 |
| H | 4.26713  | 2.85749  | 0.18420  |
| H | 3.42114  | 3.14570  | -1.34373 |
| H | 3.03121  | 4.12226  | 0.07683  |
| C | -1.21501 | 1.04173  | 0.02695  |
| C | -1.98047 | 2.20872  | -0.14870 |
| C | -1.86543 | -0.20681 | -0.02654 |
| C | -3.35495 | 2.12136  | -0.37312 |
| H | -1.50985 | 3.18426  | -0.07716 |
| C | -3.24422 | -0.28147 | -0.23309 |
| H | -1.27779 | -1.10749 | 0.06257  |
| C | -3.99724 | 0.88806  | -0.41302 |
| H | -3.93554 | 3.03015  | -0.50513 |
| H | -5.06638 | 0.80714  | -0.58007 |
| O | -3.94270 | -1.45361 | -0.29126 |
| C | -3.22295 | -2.66807 | -0.10525 |
| H | -2.73048 | -2.69422 | 0.87438  |
| H | -3.96352 | -3.46683 | -0.16214 |
| H | -2.47087 | -2.81166 | -0.89067 |
| C | 1.10864  | 0.32041  | 0.98500  |
| C | 0.81472  | -0.94405 | 1.74487  |
| H | 1.46721  | -0.96868 | 2.62765  |
| H | -0.21454 | -0.92308 | 2.12416  |
| C | 1.02648  | -2.27084 | 0.97751  |
| H | 0.86041  | -3.08670 | 1.69260  |
| H | 0.25648  | -2.38772 | 0.20304  |
| C | 2.40953  | -2.42549 | 0.31987  |
| H | 2.69089  | -3.48731 | 0.30497  |
| H | 3.16705  | -1.92167 | 0.93669  |
| C | 2.47886  | -1.88689 | -1.11530 |
| H | 1.80637  | -2.48379 | -1.74789 |
| H | 2.09794  | -0.86085 | -1.13877 |
| C | 3.89594  | -1.92012 | -1.69056 |
| H | 4.30926  | -2.93655 | -1.67348 |
| H | 3.91829  | -1.56720 | -2.72810 |
| H | 4.56755  | -1.27978 | -1.10517 |
| H | 3.29424  | 0.60048  | 1.39305  |

4e\_conformer-199

|   |          |          |          |
|---|----------|----------|----------|
| C | -2.04118 | 2.23046  | -0.39198 |
| C | -0.48306 | 0.62828  | -0.80428 |
| N | -0.69698 | 1.94948  | -0.43576 |
| H | 0.03686  | 2.63869  | -0.35275 |
| C | -2.70369 | 1.05739  | -0.70247 |
| C | -2.55587 | 3.59588  | -0.07275 |
| H | -3.64895 | 3.58606  | -0.05110 |
| H | -2.20222 | 3.94666  | 0.90517  |
| H | -2.24187 | 4.33890  | -0.81760 |
| C | 0.87264  | 0.08271  | -0.87809 |
| C | 1.23972  | -0.83529 | -1.87421 |
| C | 1.83641  | 0.48738  | 0.06846  |
| C | 2.53818  | -1.34783 | -1.90832 |
| H | 0.52100  | -1.12079 | -2.63393 |
| C | 3.13675  | -0.01964 | 0.01485  |
| H | 1.54242  | 1.17108  | 0.85526  |
| C | 3.48976  | -0.94808 | -0.97626 |
| H | 2.81544  | -2.05745 | -2.68286 |
| H | 4.50351  | -1.33487 | -0.99628 |
| O | 4.12736  | 0.31655  | 0.89182  |
| C | 3.81842  | 1.24972  | 1.92211  |
| H | 3.03103  | 0.86798  | 2.58322  |
| H | 4.73894  | 1.38176  | 2.49206  |
| H | 3.50436  | 2.21447  | 1.50575  |
| C | -1.73445 | 0.03856  | -0.95854 |
| C | -2.05611 | -1.40662 | -1.22874 |
| H | -2.65735 | -1.46981 | -2.14650 |
| H | -1.13788 | -1.96860 | -1.42918 |
| C | -2.83376 | -2.11341 | -0.09370 |
| H | -3.58103 | -1.42420 | 0.31815  |
| H | -3.39804 | -2.94750 | -0.53116 |
| C | -1.96220 | -2.68994 | 1.03420  |
| H | -1.29021 | -3.44310 | 0.59788  |
| H | -2.61941 | -3.23443 | 1.72812  |
| C | -1.11723 | -1.69387 | 1.84295  |
| H | -0.54673 | -2.26455 | 2.58906  |
| H | -0.37737 | -1.21891 | 1.19089  |
| C | -1.93282 | -0.61202 | 2.55583  |
| H | -2.69775 | -1.05727 | 3.20543  |
| H | -1.28788 | 0.01532  | 3.18266  |
| H | -2.43647 | 0.04288  | 1.83811  |
| H | -3.77948 | 0.93681  | -0.72889 |

4e\_conformer-200

|   |          |         |         |
|---|----------|---------|---------|
| C | -1.56166 | 2.33722 | 0.28056 |
|---|----------|---------|---------|

|   |          |          |          |
|---|----------|----------|----------|
| C | -0.13993 | 0.56195  | 0.33071  |
| N | -0.31920 | 1.87714  | -0.07741 |
| H | 0.33714  | 2.38789  | -0.65006 |
| C | -2.18702 | 1.30640  | 0.95730  |
| C | -2.03210 | 3.71095  | -0.06931 |
| H | -1.36835 | 4.48644  | 0.33378  |
| H | -2.08609 | 3.86134  | -1.15542 |
| H | -3.03189 | 3.87714  | 0.34069  |
| C | 1.13694  | -0.11692 | 0.11775  |
| C | 1.21699  | -1.51861 | -0.01816 |
| C | 2.32610  | 0.62505  | 0.04210  |
| C | 2.44849  | -2.13336 | -0.21265 |
| H | 0.31456  | -2.11538 | -0.00106 |
| C | 3.55988  | -0.00000 | -0.17040 |
| H | 2.32275  | 1.70183  | 0.17881  |
| C | 3.63145  | -1.39261 | -0.29483 |
| H | 2.49534  | -3.21373 | -0.31859 |
| H | 4.57635  | -1.89730 | -0.45321 |
| O | 4.63872  | 0.83593  | -0.22577 |
| C | 5.92347  | 0.25237  | -0.41674 |
| H | 6.17559  | -0.43420 | 0.40041  |
| H | 5.98040  | -0.28510 | -1.37093 |
| H | 6.63087  | 1.08261  | -0.42501 |
| C | -1.31091 | 0.17998  | 0.98824  |
| C | -1.62220 | -1.13218 | 1.65336  |
| H | -0.69927 | -1.58750 | 2.03306  |
| H | -2.24952 | -0.92937 | 2.53158  |
| C | -2.36249 | -2.17710 | 0.78579  |
| H | -1.69619 | -2.54850 | -0.00429 |
| H | -2.57682 | -3.03866 | 1.43113  |
| C | -3.66557 | -1.67620 | 0.13640  |
| H | -4.37350 | -2.51154 | 0.04686  |
| H | -4.14740 | -0.94345 | 0.79918  |
| C | -3.47216 | -1.05723 | -1.25436 |
| H | -2.69450 | -0.28823 | -1.20719 |
| H | -3.10109 | -1.83501 | -1.93703 |
| C | -4.75961 | -0.44933 | -1.81412 |
| H | -5.56229 | -1.19575 | -1.86751 |
| H | -5.11203 | 0.37034  | -1.17557 |
| H | -4.60991 | -0.04625 | -2.82242 |
| H | -3.17766 | 1.35274  | 1.39108  |

4e\_conformer-201

|   |         |         |         |
|---|---------|---------|---------|
| C | 1.56176 | 2.33715 | 0.28080 |
| C | 0.14005 | 0.56185 | 0.33095 |

|   |          |          |          |
|---|----------|----------|----------|
| N | 0.31931  | 1.87705  | -0.07718 |
| H | -0.33702 | 2.38778  | -0.64984 |
| C | 2.18712  | 1.30634  | 0.95756  |
| C | 2.03219  | 3.71088  | -0.06907 |
| H | 2.08630  | 3.86123  | -1.15519 |
| H | 1.36838  | 4.48636  | 0.33391  |
| H | 3.03193  | 3.87711  | 0.34103  |
| C | -1.13685 | -0.11699 | 0.11799  |
| C | -1.21702 | -1.51870 | -0.01754 |
| C | -2.32595 | 0.62506  | 0.04199  |
| C | -2.44856 | -2.13339 | -0.21201 |
| H | -0.31466 | -2.11557 | -0.00017 |
| C | -3.55976 | 0.00006  | -0.17050 |
| H | -2.32254 | 1.70188  | 0.17843  |
| C | -3.63144 | -1.39257 | -0.29454 |
| H | -2.49549 | -3.21380 | -0.31765 |
| H | -4.57637 | -1.89723 | -0.45290 |
| O | -4.63852 | 0.83608  | -0.22624 |
| C | -5.92330 | 0.25259  | -0.41722 |
| H | -5.98015 | -0.28513 | -1.37128 |
| H | -6.17557 | -0.43375 | 0.40008  |
| H | -6.63062 | 1.08289  | -0.42578 |
| C | 1.31104  | 0.17990  | 0.98849  |
| C | 1.62245  | -1.13226 | 1.65352  |
| H | 2.24998  | -0.92947 | 2.53159  |
| H | 0.69962  | -1.58762 | 2.03341  |
| C | 2.36257  | -2.17710 | 0.78571  |
| H | 2.57711  | -3.03869 | 1.43094  |
| H | 1.69609  | -2.54847 | -0.00424 |
| C | 3.66544  | -1.67606 | 0.13600  |
| H | 4.14727  | -0.94311 | 0.79856  |
| H | 4.37351  | -2.51128 | 0.04644  |
| C | 3.47163  | -1.05734 | -1.25481 |
| H | 3.10060  | -1.83529 | -1.93730 |
| H | 2.69382  | -0.28849 | -1.20759 |
| C | 4.75883  | -0.44923 | -1.81491 |
| H | 5.11120  | 0.37062  | -1.17654 |
| H | 5.56167  | -1.19548 | -1.86835 |
| H | 4.60885  | -0.04633 | -2.82324 |
| H | 3.17777  | 1.35269  | 1.39134  |

4e\_conformer-202

|   |         |          |          |
|---|---------|----------|----------|
| C | 3.65775 | -0.62806 | -0.18607 |
| C | 1.59988 | 0.30375  | 0.07058  |
| N | 2.94335 | 0.54495  | -0.18137 |

|   |          |          |          |
|---|----------|----------|----------|
| H | 3.31696  | 1.44598  | -0.44354 |
| C | 2.76098  | -1.64187 | 0.09781  |
| C | 5.12432  | -0.66340 | -0.46785 |
| H | 5.35740  | -0.30127 | -1.47773 |
| H | 5.69170  | -0.04388 | 0.23837  |
| H | 5.49392  | -1.68921 | -0.38754 |
| C | 0.64421  | 1.40790  | 0.14891  |
| C | 1.04579  | 2.66528  | 0.63228  |
| C | -0.68883 | 1.23575  | -0.27605 |
| C | 0.13460  | 3.72085  | 0.68722  |
| H | 2.05996  | 2.80786  | 0.99229  |
| C | -1.59437 | 2.29756  | -0.20766 |
| H | -0.98874 | 0.28377  | -0.69126 |
| C | -1.18253 | 3.54863  | 0.27576  |
| H | 0.45407  | 4.68774  | 1.06592  |
| H | -1.90201 | 4.36009  | 0.31401  |
| O | -2.89681 | 2.22148  | -0.61010 |
| C | -3.36490 | 0.98269  | -1.13295 |
| H | -3.29743 | 0.18499  | -0.38554 |
| H | -4.41064 | 1.14507  | -1.39716 |
| H | -2.80376 | 0.68793  | -2.02797 |
| C | 1.46339  | -1.07042 | 0.26262  |
| C | 0.21871  | -1.83024 | 0.62493  |
| H | 0.46757  | -2.58843 | 1.38022  |
| H | -0.49944 | -1.15367 | 1.09486  |
| C | -0.42449 | -2.54999 | -0.57780 |
| H | -0.75621 | -1.80845 | -1.31889 |
| H | 0.36545  | -3.12988 | -1.07281 |
| C | -1.58816 | -3.49837 | -0.24295 |
| H | -1.70515 | -4.19235 | -1.08583 |
| H | -1.31148 | -4.11847 | 0.62270  |
| C | -2.96020 | -2.85231 | 0.01345  |
| H | -3.20308 | -2.18748 | -0.82786 |
| H | -3.71536 | -3.64936 | -0.00757 |
| C | -3.11084 | -2.08762 | 1.33347  |
| H | -2.79739 | -2.70658 | 2.18302  |
| H | -2.51332 | -1.17145 | 1.35587  |
| H | -4.15568 | -1.79933 | 1.49760  |
| H | 3.01180  | -2.69090 | 0.19502  |

#### 4e\_conformer-203

|   |          |         |          |
|---|----------|---------|----------|
| C | -1.66606 | 3.18159 | -0.20483 |
| C | -1.25246 | 0.95969 | 0.04564  |
| N | -2.22706 | 1.93009 | -0.14212 |
| H | -3.20031 | 1.72923 | -0.32194 |

|   |          |          |          |
|---|----------|----------|----------|
| C | -0.30419 | 3.01736  | -0.02549 |
| C | -2.48600 | 4.40843  | -0.43718 |
| H | -2.99982 | 4.38120  | -1.40698 |
| H | -3.25537 | 4.53873  | 0.33460  |
| H | -1.84374 | 5.29308  | -0.42421 |
| C | -1.61052 | -0.45115 | 0.17547  |
| C | -2.85875 | -0.83320 | 0.69829  |
| C | -0.71010 | -1.45689 | -0.22986 |
| C | -3.19031 | -2.18425 | 0.81000  |
| H | -3.55632 | -0.07795 | 1.04673  |
| C | -1.04383 | -2.80555 | -0.09265 |
| H | 0.22924  | -1.17124 | -0.67909 |
| C | -2.29375 | -3.17587 | 0.42519  |
| H | -4.15690 | -2.46751 | 1.21729  |
| H | -2.53616 | -4.22972 | 0.51558  |
| O | -0.22070 | -3.83395 | -0.45348 |
| C | 1.07323  | -3.50893 | -0.95122 |
| H | 1.01212  | -2.93462 | -1.88353 |
| H | 1.65151  | -2.93828 | -0.21424 |
| H | 1.56813  | -4.46158 | -1.14403 |
| C | -0.02957 | 1.62661  | 0.13322  |
| C | 1.32922  | 1.03285  | 0.37646  |
| H | 1.89309  | 1.70065  | 1.03812  |
| H | 1.23523  | 0.07769  | 0.90707  |
| C | 2.13432  | 0.81922  | -0.92085 |
| H | 1.50209  | 0.28854  | -1.64563 |
| H | 2.34004  | 1.80118  | -1.36897 |
| C | 3.45205  | 0.04718  | -0.76187 |
| H | 3.23848  | -0.96769 | -0.39461 |
| H | 3.88017  | -0.08017 | -1.76457 |
| C | 4.50632  | 0.70352  | 0.15264  |
| H | 5.50645  | 0.43686  | -0.21253 |
| H | 4.43486  | 1.79670  | 0.06194  |
| C | 4.41597  | 0.29740  | 1.62858  |
| H | 5.20930  | 0.77353  | 2.21664  |
| H | 3.45739  | 0.57549  | 2.07656  |
| H | 4.52688  | -0.78860 | 1.73663  |
| H | 0.42526  | 3.81728  | 0.00262  |

#### 4e\_conformer-204

|   |         |         |          |
|---|---------|---------|----------|
| C | 1.66936 | 3.17993 | -0.20493 |
| C | 1.25348 | 0.95848 | 0.04561  |
| N | 2.22908 | 1.92786 | -0.14218 |
| H | 3.20216 | 1.72600 | -0.32182 |
| C | 0.30732 | 3.01710 | -0.02560 |



|   |          |          |          |
|---|----------|----------|----------|
| C | 2.49052  | 4.40594  | -0.43733 |
| H | 3.26015  | 4.53538  | 0.33434  |
| H | 3.00416  | 4.37825  | -1.40722 |
| H | 1.84917  | 5.29125  | -0.42419 |
| C | 1.61003  | -0.45274 | 0.17551  |
| C | 2.85773  | -0.83612 | 0.69858  |
| C | 0.70861  | -1.45751 | -0.23000 |
| C | 3.18782  | -2.18753 | 0.81039  |
| H | 3.55603  | -0.08161 | 1.04715  |
| C | 1.04086  | -2.80653 | -0.09269 |
| H | -0.23032 | -1.17085 | -0.67944 |
| C | 2.29027  | -3.17819 | 0.42541  |
| H | 4.15402  | -2.47183 | 1.21787  |
| H | 2.53152  | -4.23229 | 0.51587  |
| O | 0.21670  | -3.83405 | -0.45367 |
| C | -1.07675 | -3.50765 | -0.95175 |
| H | -1.65461 | -2.93638 | -0.21492 |
| H | -1.01478 | -2.93340 | -1.88403 |
| H | -1.57262 | -4.45977 | -1.14469 |
| C | 0.03127  | 1.62664  | 0.13316  |
| C | -1.32812 | 1.03428  | 0.37647  |
| H | -1.23507 | 0.07908  | 0.90720  |
| H | -1.89130 | 1.70271  | 1.03807  |
| C | -2.13345 | 0.82127  | -0.92079 |
| H | -2.33829 | 1.80339  | -1.36898 |
| H | -1.50173 | 0.28997  | -1.64554 |
| C | -3.45188 | 0.05045  | -0.76172 |
| H | -3.88015 | -0.07659 | -1.76439 |
| H | -3.23922 | -0.96459 | -0.39437 |
| C | -4.50553 | 0.70781  | 0.15277  |
| H | -4.43311 | 1.80092  | 0.06196  |
| H | -5.50591 | 0.44200  | -0.21233 |
| C | -4.41549 | 0.30177  | 1.62876  |
| H | -3.45666 | 0.57907  | 2.07668  |
| H | -5.20839 | 0.77864  | 2.21679  |
| H | -4.52734 | -0.78413 | 1.73693  |
| H | -0.42130 | 3.81778  | 0.00246  |

#### 4e\_conformer-205

|   |         |         |          |
|---|---------|---------|----------|
| C | 2.39772 | 2.03667 | 0.11192  |
| C | 0.35354 | 1.04957 | 0.26000  |
| N | 1.07566 | 2.12255 | -0.24594 |
| H | 0.69711 | 2.81522 | -0.87553 |
| C | 2.52625 | 0.89927 | 0.88757  |
| C | 3.40796 | 3.04327 | -0.33192 |

|   |          |          |          |
|---|----------|----------|----------|
| H | 3.51312  | 3.06373  | -1.42451 |
| H | 3.14259  | 4.05892  | -0.01170 |
| H | 4.38576  | 2.80102  | 0.09295  |
| C | -1.09178 | 0.96614  | 0.05976  |
| C | -1.85893 | 2.13975  | -0.11516 |
| C | -1.75539 | -0.26765 | 0.03399  |
| C | -3.23210 | 2.05802  | -0.30905 |
| H | -1.38128 | 3.11320  | -0.06556 |
| C | -3.14205 | -0.34038 | -0.14528 |
| H | -1.20702 | -1.19619 | 0.12344  |
| C | -3.89431 | 0.82597  | -0.32386 |
| H | -3.81015 | 2.96882  | -0.43883 |
| H | -4.96648 | 0.78998  | -0.47142 |
| O | -3.66407 | -1.60282 | -0.14723 |
| C | -5.06660 | -1.74276 | -0.34812 |
| H | -5.63572 | -1.24396 | 0.44562  |
| H | -5.37303 | -1.33916 | -1.32075 |
| H | -5.26747 | -2.81452 | -0.31999 |
| C | 1.25258  | 0.26205  | 0.98168  |
| C | 0.97579  | -0.99600 | 1.75713  |
| H | 1.64046  | -1.01115 | 2.63110  |
| H | -0.04863 | -0.97598 | 2.14937  |
| C | 1.18192  | -2.32594 | 0.99449  |
| H | 1.01949  | -3.13911 | 1.71349  |
| H | 0.40644  | -2.44218 | 0.22563  |
| C | 2.56151  | -2.48478 | 0.32990  |
| H | 3.32221  | -1.97478 | 0.93780  |
| H | 2.84418  | -3.54638 | 0.32290  |
| C | 2.62278  | -1.95941 | -1.11055 |
| H | 1.94721  | -2.56239 | -1.73398 |
| H | 2.24138  | -0.93374 | -1.14144 |
| C | 4.03670  | -1.99751 | -1.69332 |
| H | 4.71145  | -1.35160 | -1.11772 |
| H | 4.45047  | -3.01363 | -1.66908 |
| H | 4.05323  | -1.65430 | -2.73424 |
| H | 3.44413  | 0.55520  | 1.34669  |

4e\_conformer-206

|   |          |         |          |
|---|----------|---------|----------|
| C | -2.39787 | 2.03656 | 0.11196  |
| C | -0.35363 | 1.04957 | 0.25998  |
| N | -1.07583 | 2.12250 | -0.24593 |
| H | -0.69732 | 2.81521 | -0.87553 |
| C | -2.52631 | 0.89915 | 0.88762  |
| C | -3.40817 | 3.04310 | -0.33185 |
| H | -3.14284 | 4.05877 | -0.01166 |

|   |          |          |          |
|---|----------|----------|----------|
| H | -3.51339 | 3.06354  | -1.42444 |
| H | -4.38595 | 2.80083  | 0.09307  |
| C | 1.09168  | 0.96620  | 0.05974  |
| C | 1.85879  | 2.13982  | -0.11522 |
| C | 1.75532  | -0.26758 | 0.03400  |
| C | 3.23197  | 2.05812  | -0.30910 |
| H | 1.38111  | 3.11326  | -0.06565 |
| C | 3.14198  | -0.34028 | -0.14527 |
| H | 1.20697  | -1.19613 | 0.12349  |
| C | 3.89421  | 0.82609  | -0.32388 |
| H | 3.80999  | 2.96893  | -0.43890 |
| H | 4.96638  | 0.79013  | -0.47143 |
| O | 3.66405  | -1.60270 | -0.14717 |
| C | 5.06658  | -1.74260 | -0.34806 |
| H | 5.37299  | -1.33902 | -1.32070 |
| H | 5.63568  | -1.24377 | 0.44567  |
| H | 5.26748  | -2.81435 | -0.31990 |
| C | -1.25261 | 0.26200  | 0.98169  |
| C | -0.97569 | -0.99601 | 1.75715  |
| H | 0.04874  | -0.97591 | 2.14934  |
| H | -1.64032 | -1.01120 | 2.63115  |
| C | -1.18176 | -2.32599 | 0.99455  |
| H | -0.40622 | -2.44225 | 0.22575  |
| H | -1.01935 | -3.13914 | 1.71359  |
| C | -2.56130 | -2.48486 | 0.32987  |
| H | -2.84394 | -3.54646 | 0.32286  |
| H | -3.32204 | -1.97487 | 0.93771  |
| C | -2.62245 | -1.95950 | -1.11059 |
| H | -2.24102 | -0.93385 | -1.14146 |
| H | -1.94685 | -2.56251 | -1.73397 |
| C | -4.03632 | -1.99756 | -1.69346 |
| H | -4.45013 | -3.01367 | -1.66925 |
| H | -4.71110 | -1.35163 | -1.11791 |
| H | -4.05278 | -1.65434 | -2.73438 |
| H | -3.44416 | 0.55504  | 1.34676  |

#### 4e\_conformer-207

|   |          |         |          |
|---|----------|---------|----------|
| C | -1.70788 | 2.53889 | 0.09769  |
| C | -0.26138 | 0.83919 | 0.53895  |
| N | -0.39661 | 2.13709 | 0.06461  |
| H | 0.38191  | 2.74313 | -0.15201 |
| C | -2.43759 | 1.46552 | 0.57735  |
| C | -2.13146 | 3.90876 | -0.32074 |
| H | -3.21838 | 4.00059 | -0.24636 |
| H | -1.68513 | 4.68825 | 0.31058  |

|   |          |          |          |
|---|----------|----------|----------|
| H | -1.84476 | 4.12651  | -1.35748 |
| C | 1.05196  | 0.19740  | 0.57693  |
| C | 1.36582  | -0.77493 | 1.54940  |
| C | 2.04096  | 0.55207  | -0.35193 |
| C | 2.62420  | -1.36372 | 1.56781  |
| H | 0.63039  | -1.04629 | 2.29734  |
| C | 3.31150  | -0.03500 | -0.31758 |
| H | 1.83489  | 1.26912  | -1.14038 |
| C | 3.61249  | -1.00562 | 0.64465  |
| H | 2.85483  | -2.11023 | 2.32284  |
| H | 4.58627  | -1.47761 | 0.68452  |
| O | 4.18268  | 0.39718  | -1.27661 |
| C | 5.48354  | -0.18129 | -1.30282 |
| H | 6.02705  | 0.01562  | -0.37090 |
| H | 5.43576  | -1.26382 | -1.47167 |
| H | 6.00539  | 0.29354  | -2.13468 |
| C | -1.54414 | 0.39134  | 0.86267  |
| C | -1.97663 | -0.97802 | 1.31902  |
| H | -1.52372 | -1.23053 | 2.28700  |
| H | -3.05439 | -0.94586 | 1.50365  |
| C | -1.64446 | -2.11693 | 0.32929  |
| H | -0.55471 | -2.23461 | 0.31124  |
| H | -2.04723 | -3.05763 | 0.73093  |
| C | -2.12612 | -1.93271 | -1.11936 |
| H | -1.88337 | -0.91481 | -1.45238 |
| H | -1.53341 | -2.60783 | -1.75128 |
| C | -3.60943 | -2.22393 | -1.40231 |
| H | -3.73692 | -2.28150 | -2.49204 |
| H | -3.85921 | -3.22294 | -1.01675 |
| C | -4.61226 | -1.20079 | -0.85687 |
| H | -4.33287 | -0.18274 | -1.15186 |
| H | -5.61920 | -1.40030 | -1.24216 |
| H | -4.67077 | -1.22239 | 0.23543  |
| H | -3.51225 | 1.44388  | 0.70413  |

#### 4e\_conformer-208

|   |         |          |          |
|---|---------|----------|----------|
| C | 2.71543 | -1.78591 | 0.05847  |
| C | 0.56264 | -1.07212 | 0.24486  |
| N | 1.40920 | -2.04335 | -0.27373 |
| H | 1.11271 | -2.77946 | -0.89799 |
| C | 2.70900 | -0.63814 | 0.82927  |
| C | 3.83890 | -2.65590 | -0.40175 |
| H | 3.71373 | -3.69494 | -0.07135 |
| H | 3.92374 | -2.67046 | -1.49614 |
| H | 4.78522 | -2.28596 | 0.00179  |

|   |          |          |          |
|---|----------|----------|----------|
| C | -0.88438 | -1.18458 | 0.07451  |
| C | -1.49037 | -2.43937 | -0.12011 |
| C | -1.70375 | -0.03891 | 0.09916  |
| C | -2.87184 | -2.53550 | -0.29189 |
| H | -0.89035 | -3.34365 | -0.10402 |
| C | -3.08655 | -0.14806 | -0.05858 |
| H | -1.24518 | 0.92981  | 0.21561  |
| C | -3.67903 | -1.40298 | -0.26093 |
| H | -3.32644 | -3.51116 | -0.43960 |
| H | -4.75478 | -1.46526 | -0.38865 |
| O | -3.93936 | 0.91834  | -0.04462 |
| C | -3.38209 | 2.21414  | 0.15019  |
| H | -2.85924 | 2.28388  | 1.11178  |
| H | -2.68765 | 2.47572  | -0.65764 |
| H | -4.22459 | 2.90679  | 0.14289  |
| C | 1.36647  | -0.16904 | 0.94525  |
| C | 0.95697  | 1.03957  | 1.74287  |
| H | -0.00932 | 0.85399  | 2.22991  |
| H | 1.68720  | 1.16768  | 2.55279  |
| C | 0.85765  | 2.38846  | 0.99326  |
| H | -0.00172 | 2.38335  | 0.31368  |
| H | 0.62775  | 3.15094  | 1.74931  |
| C | 2.10419  | 2.83791  | 0.21281  |
| H | 2.02705  | 3.92362  | 0.05895  |
| H | 2.99635  | 2.68241  | 0.83603  |
| C | 2.33106  | 2.18298  | -1.16251 |
| H | 3.20511  | 2.66550  | -1.62146 |
| H | 2.58994  | 1.12820  | -1.03632 |
| C | 1.13964  | 2.29862  | -2.11878 |
| H | 0.28834  | 1.69888  | -1.77827 |
| H | 0.79947  | 3.33812  | -2.21269 |
| H | 1.40764  | 1.94360  | -3.12057 |
| H | 3.58191  | -0.17190 | 1.26848  |

4e\_conformer-209

|   |          |         |          |
|---|----------|---------|----------|
| C | 0.74295  | 3.39594 | 0.05655  |
| C | 0.04029  | 1.23642 | -0.04973 |
| N | -0.33492 | 2.56920 | -0.14493 |
| H | -1.24918 | 2.88110 | -0.43948 |
| C | 1.82912  | 2.57939 | 0.31496  |
| C | 0.62820  | 4.88312 | -0.02577 |
| H | -0.10778 | 5.27668 | 0.68693  |
| H | 1.59384  | 5.34387 | 0.19914  |
| H | 0.32247  | 5.21664 | -1.02608 |
| C | -0.94345 | 0.16454 | -0.19465 |

|   |          |          |          |
|---|----------|----------|----------|
| C | -0.58752 | -1.09329 | -0.72539 |
| C | -2.27677 | 0.37170  | 0.18869  |
| C | -1.54216 | -2.09673 | -0.84351 |
| H | 0.42371  | -1.26742 | -1.07171 |
| C | -3.23591 | -0.63823 | 0.04988  |
| H | -2.58961 | 1.31228  | 0.63122  |
| C | -2.87170 | -1.88893 | -0.46321 |
| H | -1.25637 | -3.06093 | -1.25491 |
| H | -3.59617 | -2.68649 | -0.57165 |
| O | -4.49699 | -0.30942 | 0.45832  |
| C | -5.50986 | -1.30537 | 0.35868  |
| H | -6.42279 | -0.84212 | 0.73514  |
| H | -5.66149 | -1.61830 | -0.68136 |
| H | -5.26756 | -2.18370 | 0.96898  |
| C | 1.40173  | 1.21930  | 0.25224  |
| C | 2.26959  | 0.01948  | 0.50556  |
| H | 2.92841  | 0.21841  | 1.36218  |
| H | 1.64287  | -0.83162 | 0.78812  |
| C | 3.14420  | -0.35634 | -0.70491 |
| H | 2.49133  | -0.57545 | -1.56181 |
| H | 3.73094  | 0.52590  | -0.99363 |
| C | 4.09596  | -1.54087 | -0.48457 |
| H | 4.70232  | -1.64932 | -1.39301 |
| H | 4.80222  | -1.29853 | 0.32284  |
| C | 3.40975  | -2.88870 | -0.17432 |
| H | 2.43179  | -2.92268 | -0.67543 |
| H | 4.00047  | -3.70055 | -0.61752 |
| C | 3.23561  | -3.18830 | 1.31931  |
| H | 2.62683  | -2.43183 | 1.82388  |
| H | 2.75345  | -4.16088 | 1.47264  |
| H | 4.20966  | -3.21551 | 1.82299  |
| H | 2.83092  | 2.92261  | 0.54159  |

#### 4e\_conformer-210

|   |          |          |          |
|---|----------|----------|----------|
| C | -0.61792 | 3.26529  | 0.01837  |
| C | 0.10785  | 1.11278  | -0.08551 |
| N | 0.47544  | 2.45026  | -0.14093 |
| H | 1.40074  | 2.77420  | -0.38327 |
| C | -1.70861 | 2.43610  | 0.20888  |
| C | -0.51206 | 4.75443  | -0.03471 |
| H | 0.18011  | 5.14266  | 0.72339  |
| H | -0.15483 | 5.10614  | -1.01143 |
| H | -1.49264 | 5.20375  | 0.14382  |
| C | 1.10826  | 0.05279  | -0.19712 |
| C | 0.78825  | -1.20737 | -0.74531 |

|   |          |          |          |
|---|----------|----------|----------|
| C | 2.42431  | 0.27455  | 0.23567  |
| C | 1.76056  | -2.19677 | -0.83513 |
| H | -0.20799 | -1.39473 | -1.12629 |
| C | 3.40143  | -0.72137 | 0.12577  |
| H | 2.70919  | 1.21611  | 0.69467  |
| C | 3.07303  | -1.97351 | -0.40743 |
| H | 1.50288  | -3.16245 | -1.26136 |
| H | 3.81170  | -2.76050 | -0.49501 |
| O | 4.64251  | -0.37814 | 0.58116  |
| C | 5.67169  | -1.35986 | 0.51253  |
| H | 5.86482  | -1.66461 | -0.52307 |
| H | 6.56419  | -0.88672 | 0.92407  |
| H | 5.41964  | -2.24499 | 1.10891  |
| C | -1.26730 | 1.08072  | 0.14650  |
| C | -2.14307 | -0.12589 | 0.33127  |
| H | -1.54459 | -0.97935 | 0.67179  |
| H | -2.86797 | 0.08254  | 1.12692  |
| C | -2.90526 | -0.51595 | -0.95002 |
| H | -3.58982 | 0.30291  | -1.21173 |
| H | -2.18741 | -0.58195 | -1.77874 |
| C | -3.69263 | -1.83206 | -0.87537 |
| H | -4.12627 | -2.01116 | -1.86781 |
| H | -2.99533 | -2.66378 | -0.69606 |
| C | -4.81915 | -1.87815 | 0.17745  |
| H | -5.26422 | -0.87785 | 0.27640  |
| H | -5.62259 | -2.52852 | -0.19178 |
| C | -4.38765 | -2.39321 | 1.55589  |
| H | -3.98199 | -3.40941 | 1.47771  |
| H | -3.61457 | -1.76535 | 2.00882  |
| H | -5.23781 | -2.42612 | 2.24735  |
| H | -2.72377 | 2.76725  | 0.38936  |

#### 4e\_conformer-211

|   |          |          |          |
|---|----------|----------|----------|
| C | 3.78597  | -0.39687 | -0.12015 |
| C | 1.53382  | -0.65170 | 0.04633  |
| N | 2.74848  | -1.29688 | -0.13658 |
| H | 2.84260  | -2.27572 | -0.36696 |
| C | 3.23020  | 0.84966  | 0.10722  |
| C | 5.20414  | -0.81669 | -0.33024 |
| H | 5.86501  | 0.05016  | -0.24585 |
| H | 5.52529  | -1.55929 | 0.41135  |
| H | 5.35842  | -1.26058 | -1.32245 |
| C | 0.27808  | -1.39704 | 0.10468  |
| C | 0.23922  | -2.71898 | 0.59894  |
| C | -0.92103 | -0.81358 | -0.32489 |

|   |          |          |          |
|---|----------|----------|----------|
| C | -0.96709 | -3.40678 | 0.65954  |
| H | 1.14756  | -3.18892 | 0.96339  |
| C | -2.13491 | -1.50360 | -0.23830 |
| H | -0.93104 | 0.17702  | -0.76008 |
| C | -2.16745 | -2.81384 | 0.25245  |
| H | -0.98627 | -4.42219 | 1.04570  |
| H | -3.09490 | -3.36879 | 0.32064  |
| O | -3.22941 | -0.81143 | -0.67425 |
| C | -4.49378 | -1.46410 | -0.62150 |
| H | -5.21766 | -0.74591 | -1.00863 |
| H | -4.50390 | -2.36574 | -1.24576 |
| H | -4.76097 | -1.73354 | 0.40740  |
| C | 1.81518  | 0.70432  | 0.21469  |
| C | 0.83347  | 1.80632  | 0.49546  |
| H | -0.06684 | 1.37898  | 0.94633  |
| H | 1.25551  | 2.49645  | 1.23883  |
| C | 0.45264  | 2.61473  | -0.75916 |
| H | 1.36823  | 3.05468  | -1.17654 |
| H | 0.07582  | 1.92615  | -1.52841 |
| C | -0.58366 | 3.72563  | -0.53466 |
| H | -0.19658 | 4.44697  | 0.19969  |
| H | -0.68078 | 4.27898  | -1.47755 |
| C | -1.98346 | 3.24565  | -0.09033 |
| H | -2.74087 | 3.90738  | -0.52971 |
| H | -2.18123 | 2.24846  | -0.50814 |
| C | -2.20174 | 3.21930  | 1.42718  |
| H | -2.06582 | 4.22043  | 1.85440  |
| H | -3.21720 | 2.88666  | 1.67235  |
| H | -1.50138 | 2.54872  | 1.93453  |
| H | 3.78529  | 1.77466  | 0.20205  |

#### 4e\_conformer-212

|   |          |          |          |
|---|----------|----------|----------|
| C | 0.82871  | 3.45946  | -0.09055 |
| C | 0.14936  | 1.29559  | -0.27123 |
| N | -0.25235 | 2.62294  | -0.20847 |
| H | -1.20148 | 2.93403  | -0.35847 |
| C | 1.95159  | 2.65148  | -0.04807 |
| C | 0.68300  | 4.94542  | -0.04473 |
| H | 0.23918  | 5.34360  | -0.96659 |
| H | 0.04600  | 5.26846  | 0.78855  |
| H | 1.66385  | 5.41150  | 0.08186  |
| C | -0.83835 | 0.22111  | -0.36456 |
| C | -0.53510 | -1.00767 | -0.98885 |
| C | -2.12633 | 0.39582  | 0.16307  |
| C | -1.49368 | -2.01077 | -1.06170 |



|   |          |          |          |
|---|----------|----------|----------|
| H | 0.43937  | -1.16277 | -1.43437 |
| C | -3.09139 | -0.61431 | 0.07226  |
| H | -2.39765 | 1.30856  | 0.68412  |
| C | -2.77917 | -1.83378 | -0.53928 |
| H | -1.24683 | -2.95128 | -1.54657 |
| H | -3.50805 | -2.63119 | -0.61329 |
| O | -4.30419 | -0.31667 | 0.62540  |
| C | -5.31723 | -1.31654 | 0.58460  |
| H | -5.57671 | -1.58048 | -0.44771 |
| H | -5.00732 | -2.22090 | 1.12198  |
| H | -6.18733 | -0.88111 | 1.07763  |
| C | 1.54256  | 1.29136  | -0.16568 |
| C | 2.46183  | 0.10311  | -0.07094 |
| H | 2.34356  | -0.54864 | -0.94244 |
| H | 3.50011  | 0.45749  | -0.10350 |
| C | 2.25164  | -0.71470 | 1.21619  |
| H | 2.40614  | -0.04693 | 2.07410  |
| H | 1.20354  | -1.03645 | 1.26196  |
| C | 3.15469  | -1.94761 | 1.36356  |
| H | 4.20985  | -1.63748 | 1.35747  |
| H | 2.97141  | -2.37237 | 2.35890  |
| C | 2.93536  | -3.04603 | 0.29971  |
| H | 3.06007  | -4.03036 | 0.76872  |
| H | 1.89283  | -3.00919 | -0.04693 |
| C | 3.88454  | -2.96899 | -0.90202 |
| H | 3.79593  | -2.01834 | -1.43752 |
| H | 4.92760  | -3.06569 | -0.57658 |
| H | 3.68230  | -3.77455 | -1.61770 |
| H | 2.97135  | 2.99899  | 0.06189  |

#### 4e\_conformer-213

|   |          |          |          |
|---|----------|----------|----------|
| C | -0.77035 | 3.04575  | -0.14313 |
| C | 0.14033  | 0.96257  | -0.10361 |
| N | 0.38740  | 2.31838  | -0.27056 |
| H | 1.27457  | 2.70079  | -0.56481 |
| C | -1.77873 | 2.14309  | 0.14118  |
| C | -0.79815 | 4.52946  | -0.31399 |
| H | -0.12448 | 5.03504  | 0.38961  |
| H | -0.49772 | 4.83180  | -1.32574 |
| H | -1.80997 | 4.90521  | -0.13972 |
| C | 1.22851  | -0.01184 | -0.16501 |
| C | 1.01166  | -1.32900 | -0.62143 |
| C | 2.52641  | 0.35243  | 0.22346  |
| C | 2.06543  | -2.23452 | -0.66627 |
| H | 0.02929  | -1.62615 | -0.96749 |

|   |          |          |          |
|---|----------|----------|----------|
| C | 3.58538  | -0.56047 | 0.15892  |
| H | 2.73412  | 1.34437  | 0.61247  |
| C | 3.35977  | -1.86965 | -0.28281 |
| H | 1.88714  | -3.24562 | -1.02194 |
| H | 4.16322  | -2.59390 | -0.33375 |
| O | 4.79853  | -0.08109 | 0.56369  |
| C | 5.90846  | -0.97277 | 0.53913  |
| H | 6.11241  | -1.32909 | -0.47779 |
| H | 6.76209  | -0.39775 | 0.90028  |
| H | 5.74332  | -1.83403 | 1.19764  |
| C | -1.22086 | 0.82964  | 0.16961  |
| C | -1.98724 | -0.42544 | 0.47561  |
| H | -1.30616 | -1.21009 | 0.82579  |
| H | -2.67855 | -0.22964 | 1.30301  |
| C | -2.78235 | -0.96091 | -0.73264 |
| H | -3.42869 | -0.16118 | -1.11990 |
| H | -2.07003 | -1.18070 | -1.53828 |
| C | -3.62715 | -2.21443 | -0.42845 |
| H | -3.62967 | -2.86874 | -1.30956 |
| H | -3.14436 | -2.79091 | 0.37421  |
| C | -5.09008 | -1.93636 | -0.04783 |
| H | -5.58735 | -1.44614 | -0.89679 |
| H | -5.60199 | -2.89813 | 0.09119  |
| C | -5.28638 | -1.08120 | 1.20750  |
| H | -4.77392 | -1.52173 | 2.07162  |
| H | -4.89624 | -0.06687 | 1.07018  |
| H | -6.34985 | -0.99285 | 1.45795  |
| H | -2.81511 | 2.39823  | 0.32474  |

#### 4e\_conformer-214

|   |          |          |          |
|---|----------|----------|----------|
| C | -2.63514 | -2.11672 | -0.35434 |
| C | -0.57530 | -1.25313 | 0.07256  |
| N | -1.28282 | -2.31723 | -0.47092 |
| H | -0.85563 | -3.06596 | -0.99742 |
| C | -2.80316 | -0.91600 | 0.30997  |
| C | -3.63271 | -3.08133 | -0.90743 |
| H | -4.64570 | -2.74877 | -0.66521 |
| H | -3.56035 | -3.16666 | -1.99964 |
| H | -3.50022 | -4.08901 | -0.49341 |
| C | 0.88976  | -1.29894 | 0.10584  |
| C | 1.54601  | -2.52529 | 0.30856  |
| C | 1.66370  | -0.13721 | -0.08575 |
| C | 2.94063  | -2.58450 | 0.32204  |
| H | 0.96490  | -3.42524 | 0.48364  |
| C | 3.05896  | -0.20535 | -0.05143 |

|   |          |          |          |
|---|----------|----------|----------|
| H | 1.16392  | 0.79868  | -0.29220 |
| C | 3.70347  | -1.43544 | 0.15040  |
| H | 3.43714  | -3.53748 | 0.48231  |
| H | 4.78815  | -1.46349 | 0.16626  |
| O | 3.88525  | 0.86796  | -0.22265 |
| C | 3.29107  | 2.14678  | -0.41534 |
| H | 4.11857  | 2.85250  | -0.49882 |
| H | 2.69336  | 2.17589  | -1.33390 |
| H | 2.65765  | 2.42427  | 0.43518  |
| C | -1.51589 | -0.35819 | 0.58347  |
| C | -1.26438 | 0.88786  | 1.39509  |
| H | -1.27774 | 0.63138  | 2.46545  |
| H | -0.25989 | 1.26883  | 1.20106  |
| C | -2.31032 | 1.99860  | 1.17265  |
| H | -3.28353 | 1.61305  | 1.50026  |
| H | -2.08087 | 2.83499  | 1.84696  |
| C | -2.44210 | 2.52357  | -0.27162 |
| H | -2.22562 | 1.70803  | -0.97432 |
| H | -3.48853 | 2.80382  | -0.44831 |
| C | -1.57081 | 3.74139  | -0.61379 |
| H | -1.84411 | 4.09226  | -1.61810 |
| H | -1.81755 | 4.56249  | 0.07412  |
| C | -0.06248 | 3.48588  | -0.57494 |
| H | 0.20553  | 2.64933  | -1.23189 |
| H | 0.49923  | 4.36544  | -0.90986 |
| H | 0.28026  | 3.24372  | 0.43643  |
| H | -3.75907 | -0.48306 | 0.57337  |

4e\_conformer-215

|   |          |          |          |
|---|----------|----------|----------|
| C | 3.83997  | -0.20684 | -0.30288 |
| C | 1.59126  | -0.51190 | -0.14556 |
| N | 2.83418  | -1.12974 | -0.16471 |
| H | 2.96910  | -2.13018 | -0.19790 |
| C | 3.23358  | 1.03673  | -0.34646 |
| C | 5.27727  | -0.60374 | -0.39216 |
| H | 5.60159  | -1.16853 | 0.49121  |
| H | 5.47649  | -1.23158 | -1.27051 |
| H | 5.90503  | 0.28798  | -0.46991 |
| C | 0.36856  | -1.29256 | 0.03363  |
| C | 0.38982  | -2.52701 | 0.71927  |
| C | -0.85924 | -0.83325 | -0.46169 |
| C | -0.78380 | -3.25042 | 0.89623  |
| H | 1.31749  | -2.89813 | 1.14377  |
| C | -2.03987 | -1.55396 | -0.25672 |
| H | -0.92281 | 0.08886  | -1.02439 |

|   |          |          |          |
|---|----------|----------|----------|
| C | -2.01188 | -2.77820 | 0.42117  |
| H | -0.75414 | -4.19621 | 1.43021  |
| H | -2.91390 | -3.35438 | 0.58566  |
| O | -3.16910 | -0.97658 | -0.76644 |
| C | -4.40425 | -1.66314 | -0.59200 |
| H | -4.38694 | -2.64561 | -1.07898 |
| H | -4.64344 | -1.79034 | 0.47061  |
| H | -5.16343 | -1.03742 | -1.06295 |
| C | 1.82256  | 0.86229  | -0.25397 |
| C | 0.81406  | 1.97863  | -0.18999 |
| H | 1.32429  | 2.92772  | -0.39825 |
| H | 0.06710  | 1.86660  | -0.98209 |
| C | 0.11030  | 2.07894  | 1.17604  |
| H | -0.32587 | 1.10360  | 1.42383  |
| H | 0.87641  | 2.27513  | 1.93795  |
| C | -0.98846 | 3.14746  | 1.27422  |
| H | -1.29435 | 3.20521  | 2.32682  |
| H | -0.57083 | 4.13466  | 1.02760  |
| C | -2.24040 | 2.88670  | 0.40645  |
| H | -2.38094 | 1.80385  | 0.28277  |
| H | -3.12695 | 3.24266  | 0.94700  |
| C | -2.22337 | 3.56554  | -0.96841 |
| H | -2.13839 | 4.65395  | -0.86139 |
| H | -1.38331 | 3.23127  | -1.58543 |
| H | -3.14590 | 3.35562  | -1.52241 |
| H | 3.75068  | 1.98441  | -0.43172 |

4e\_conformer-216

|   |          |          |          |
|---|----------|----------|----------|
| C | -2.89547 | 2.17086  | -0.30602 |
| C | -1.51835 | 0.36895  | -0.11526 |
| N | -2.83402 | 0.81236  | -0.12722 |
| H | -3.63749 | 0.20052  | -0.12983 |
| C | -1.58855 | 2.61837  | -0.38620 |
| C | -4.19402 | 2.90365  | -0.39425 |
| H | -4.00930 | 3.97442  | -0.51504 |
| H | -4.79718 | 2.56887  | -1.24829 |
| H | -4.80373 | 2.76620  | 0.50791  |
| C | -1.21353 | -1.04635 | 0.08678  |
| C | -2.11231 | -1.88894 | 0.76512  |
| C | -0.01168 | -1.59715 | -0.40229 |
| C | -1.81355 | -3.24083 | 0.94216  |
| H | -3.02785 | -1.48527 | 1.18587  |
| C | 0.28636  | -2.94536 | -0.20074 |
| H | 0.67032  | -0.96564 | -0.95192 |
| C | -0.62153 | -3.77896 | 0.46964  |

|   |          |          |          |
|---|----------|----------|----------|
| H | -2.51564 | -3.87980 | 1.47054  |
| H | -0.37213 | -4.82548 | 0.61121  |
| O | 1.43499  | -3.54467 | -0.63319 |
| C | 2.41207  | -2.73000 | -1.27259 |
| H | 3.25058  | -3.38979 | -1.49913 |
| H | 2.02673  | -2.29747 | -2.20384 |
| H | 2.74982  | -1.92149 | -0.61250 |
| C | -0.71197 | 1.50051  | -0.27384 |
| C | 0.79087  | 1.59780  | -0.24900 |
| H | 1.24356  | 0.99639  | -1.04904 |
| H | 1.06321  | 2.63493  | -0.47309 |
| C | 1.40965  | 1.18973  | 1.10086  |
| H | 1.07408  | 1.90442  | 1.86499  |
| H | 1.00389  | 0.21442  | 1.39323  |
| C | 2.94225  | 1.10330  | 1.12169  |
| H | 3.23687  | 0.75072  | 2.11864  |
| H | 3.27208  | 0.32443  | 0.41741  |
| C | 3.69395  | 2.41430  | 0.81324  |
| H | 3.11647  | 3.26357  | 1.20534  |
| H | 4.64303  | 2.41659  | 1.36465  |
| C | 4.00729  | 2.64038  | -0.67078 |
| H | 3.10137  | 2.69819  | -1.28136 |
| H | 4.56740  | 3.57141  | -0.81708 |
| H | 4.61781  | 1.81866  | -1.06506 |
| H | -1.28455 | 3.65054  | -0.50862 |

#### 4e\_conformer-217

|   |          |          |          |
|---|----------|----------|----------|
| C | -1.63636 | 2.48976  | 0.08670  |
| C | -0.28749 | 0.66976  | 0.30997  |
| N | -0.40333 | 1.95861  | -0.19555 |
| H | 0.28821  | 2.40255  | -0.78201 |
| C | -2.32275 | 1.53317  | 0.81121  |
| C | -2.03915 | 3.85229  | -0.37371 |
| H | -1.35911 | 4.62837  | 0.00004  |
| H | -2.04898 | 3.92814  | -1.46882 |
| H | -3.04506 | 4.08425  | -0.01379 |
| C | 0.97667  | -0.05618 | 0.19913  |
| C | 1.03392  | -1.46524 | 0.23649  |
| C | 2.18238  | 0.64849  | 0.05237  |
| C | 2.25517  | -2.12066 | 0.13066  |
| H | 0.12376  | -2.04176 | 0.32416  |
| C | 3.40598  | -0.01903 | -0.06900 |
| H | 2.20235  | 1.73351  | 0.06075  |
| C | 3.45296  | -1.41751 | -0.02717 |
| H | 2.28142  | -3.20656 | 0.15779  |

|   |          |          |          |
|---|----------|----------|----------|
| H | 4.38940  | -1.95435 | -0.11351 |
| O | 4.50063  | 0.78580  | -0.20945 |
| C | 5.77593  | 0.16162  | -0.31728 |
| H | 6.00802  | -0.42970 | 0.57665  |
| H | 5.83131  | -0.48389 | -1.20209 |
| H | 6.49869  | 0.97281  | -0.41406 |
| C | -1.49619 | 0.37838  | 0.94802  |
| C | -1.88961 | -0.86176 | 1.70360  |
| H | -1.01624 | -1.26607 | 2.23172  |
| H | -2.60761 | -0.56861 | 2.48107  |
| C | -2.52601 | -2.01387 | 0.89314  |
| H | -1.78737 | -2.44535 | 0.20869  |
| H | -2.76298 | -2.80958 | 1.61207  |
| C | -3.80390 | -1.68468 | 0.10310  |
| H | -4.30819 | -2.63608 | -0.11854 |
| H | -4.49235 | -1.12014 | 0.74826  |
| C | -3.62508 | -0.92689 | -1.22577 |
| H | -4.60870 | -0.87069 | -1.71243 |
| H | -3.31610 | 0.10349  | -1.03075 |
| C | -2.62685 | -1.57444 | -2.19052 |
| H | -2.85724 | -2.63504 | -2.35555 |
| H | -2.64554 | -1.07356 | -3.16537 |
| H | -1.60160 | -1.51071 | -1.80980 |
| H | -3.32556 | 1.64290  | 1.20444  |

#### 4e\_conformer-218

|   |          |          |          |
|---|----------|----------|----------|
| C | 3.65070  | -0.32150 | -0.26183 |
| C | 1.42925  | -0.62746 | 0.11730  |
| N | 2.59116  | -1.18331 | -0.40230 |
| H | 2.61720  | -2.04197 | -0.93347 |
| C | 3.16940  | 0.79728  | 0.39107  |
| C | 5.01472  | -0.65082 | -0.77402 |
| H | 5.02295  | -0.78170 | -1.86401 |
| H | 5.70936  | 0.15716  | -0.52925 |
| H | 5.40456  | -1.57683 | -0.33255 |
| C | 0.17827  | -1.38632 | 0.08606  |
| C | 0.18860  | -2.79087 | 0.20771  |
| C | -1.05740 | -0.74757 | -0.10812 |
| C | -0.99482 | -3.52180 | 0.13030  |
| H | 1.12774  | -3.30741 | 0.38213  |
| C | -2.23777 | -1.48647 | -0.17242 |
| H | -1.10108 | 0.32161  | -0.25849 |
| C | -2.21992 | -2.87693 | -0.05349 |
| H | -0.96492 | -4.60355 | 0.22511  |
| H | -3.15115 | -3.43060 | -0.11624 |

|   |          |          |          |
|---|----------|----------|----------|
| O | -3.43684 | -0.84569 | -0.42398 |
| C | -4.00708 | -0.20773 | 0.72161  |
| H | -4.25127 | -0.94465 | 1.49738  |
| H | -3.32564 | 0.54121  | 1.14172  |
| H | -4.92040 | 0.28442  | 0.38190  |
| C | 1.77275  | 0.62046  | 0.63648  |
| C | 0.92065  | 1.59826  | 1.40069  |
| H | -0.05917 | 1.16126  | 1.62146  |
| H | 1.39274  | 1.78710  | 2.37458  |
| C | 0.75032  | 2.95586  | 0.68239  |
| H | 0.37739  | 3.69814  | 1.40148  |
| H | 1.74168  | 3.30311  | 0.36628  |
| C | -0.19546 | 2.91021  | -0.52629 |
| H | -0.00074 | 3.76749  | -1.18435 |
| H | 0.02680  | 2.01538  | -1.12503 |
| C | -1.67780 | 2.92936  | -0.12889 |
| H | -1.86114 | 2.18869  | 0.66079  |
| H | -1.90571 | 3.90439  | 0.32280  |
| C | -2.62837 | 2.66594  | -1.29880 |
| H | -2.45010 | 3.37363  | -2.11764 |
| H | -2.49653 | 1.65267  | -1.69563 |
| H | -3.67551 | 2.76494  | -0.99108 |
| H | 3.76333  | 1.65481  | 0.68160  |

#### 4e\_conformer-219

|   |          |          |          |
|---|----------|----------|----------|
| C | -0.91473 | 3.16060  | -0.01669 |
| C | 0.00747  | 1.11425  | 0.35878  |
| N | 0.25317  | 2.44332  | 0.04115  |
| H | 1.17585  | 2.85106  | -0.00901 |
| C | -1.93961 | 2.26795  | 0.24258  |
| C | -0.93376 | 4.62701  | -0.30037 |
| H | -0.39929 | 5.20117  | 0.46776  |
| H | -0.46756 | 4.86296  | -1.26551 |
| H | -1.96569 | 4.98705  | -0.32870 |
| C | 1.10924  | 0.15684  | 0.44666  |
| C | 1.03017  | -0.98383 | 1.27325  |
| C | 2.28633  | 0.36217  | -0.28858 |
| C | 2.09524  | -1.87346 | 1.34101  |
| H | 0.14569  | -1.15552 | 1.87422  |
| C | 3.36068  | -0.53125 | -0.20353 |
| H | 2.38250  | 1.20378  | -0.96727 |
| C | 3.27131  | -1.66427 | 0.61303  |
| H | 2.02196  | -2.74701 | 1.98300  |
| H | 4.08729  | -2.37218 | 0.68799  |
| O | 4.44679  | -0.21519 | -0.96915 |

|   |          |          |          |
|---|----------|----------|----------|
| C | 5.56213  | -1.09985 | -0.93911 |
| H | 5.28685  | -2.10144 | -1.29087 |
| H | 6.30379  | -0.66914 | -1.61306 |
| H | 5.98561  | -1.17479 | 0.06971  |
| C | -1.37770 | 0.98059  | 0.48644  |
| C | -2.18664 | -0.26802 | 0.71586  |
| H | -1.90180 | -0.76482 | 1.65259  |
| H | -3.23316 | 0.02451  | 0.84797  |
| C | -2.07456 | -1.29116 | -0.43167 |
| H | -2.32862 | -0.79446 | -1.37815 |
| H | -1.02303 | -1.58720 | -0.51723 |
| C | -2.95151 | -2.54546 | -0.24600 |
| H | -2.42597 | -3.41574 | -0.65988 |
| H | -3.07093 | -2.74869 | 0.82843  |
| C | -4.33664 | -2.47723 | -0.90859 |
| H | -4.20231 | -2.37230 | -1.99453 |
| H | -4.84313 | -3.43986 | -0.75588 |
| C | -5.24550 | -1.35100 | -0.40714 |
| H | -4.83640 | -0.36410 | -0.64908 |
| H | -6.23872 | -1.41631 | -0.86627 |
| H | -5.37547 | -1.40104 | 0.68103  |
| H | -2.99535 | 2.50911  | 0.25244  |

#### 4e\_conformer-220

|   |          |          |          |
|---|----------|----------|----------|
| C | -1.30299 | 3.28725  | -0.29673 |
| C | 0.10179  | 1.50418  | -0.12970 |
| N | -0.01822 | 2.88436  | -0.03572 |
| H | 0.76215  | 3.51358  | 0.08679  |
| C | -2.03540 | 2.13878  | -0.54041 |
| C | -1.70001 | 4.72720  | -0.29996 |
| H | -2.76907 | 4.81769  | -0.51018 |
| H | -1.50457 | 5.20787  | 0.66713  |
| H | -1.15828 | 5.30072  | -1.06342 |
| C | 1.38186  | 0.85046  | 0.13628  |
| C | 2.35246  | 1.46497  | 0.94765  |
| C | 1.67147  | -0.41147 | -0.42102 |
| C | 3.57312  | 0.83229  | 1.18821  |
| H | 2.14440  | 2.41937  | 1.42078  |
| C | 2.88504  | -1.04595 | -0.15366 |
| H | 0.94694  | -0.87686 | -1.07242 |
| C | 3.84975  | -0.41977 | 0.64994  |
| H | 4.31257  | 1.31758  | 1.81917  |
| H | 4.78913  | -0.92824 | 0.84092  |
| O | 3.22500  | -2.27534 | -0.64212 |
| C | 2.25300  | -2.97975 | -1.40832 |



|   |          |          |          |
|---|----------|----------|----------|
| H | 2.70448  | -3.94221 | -1.65250 |
| H | 1.33295  | -3.14142 | -0.83316 |
| H | 2.00974  | -2.44635 | -2.33521 |
| C | -1.16869 | 1.01155  | -0.44541 |
| C | -1.62112 | -0.41864 | -0.57779 |
| H | -2.66154 | -0.41556 | -0.91736 |
| H | -1.06239 | -0.94276 | -1.36497 |
| C | -1.50153 | -1.22830 | 0.72866  |
| H | -0.46161 | -1.17002 | 1.06751  |
| H | -2.10320 | -0.73969 | 1.50736  |
| C | -1.91018 | -2.70875 | 0.59812  |
| H | -1.67424 | -3.06055 | -0.41733 |
| H | -1.28970 | -3.30964 | 1.27568  |
| C | -3.38145 | -3.01943 | 0.91570  |
| H | -3.52850 | -4.10573 | 0.84631  |
| H | -3.57951 | -2.75158 | 1.96322  |
| C | -4.40729 | -2.32038 | 0.01858  |
| H | -4.21208 | -2.52513 | -1.04136 |
| H | -5.42308 | -2.66482 | 0.24460  |
| H | -4.39131 | -1.23404 | 0.15691  |
| H | -3.09482 | 2.10461  | -0.76231 |

4e\_conformer-221

|   |          |          |          |
|---|----------|----------|----------|
| C | 1.30357  | 3.28702  | -0.29676 |
| C | -0.10154 | 1.50422  | -0.12974 |
| N | 0.01874  | 2.88437  | -0.03573 |
| H | -0.76151 | 3.51373  | 0.08679  |
| C | 2.03577  | 2.13841  | -0.54048 |
| C | 1.70087  | 4.72689  | -0.29999 |
| H | 2.76996  | 4.81718  | -0.51014 |
| H | 1.15930  | 5.30051  | -1.06349 |
| H | 1.50546  | 5.20761  | 0.66708  |
| C | -1.38170 | 0.85069  | 0.13629  |
| C | -2.35212 | 1.46529  | 0.94781  |
| C | -1.67155 | -0.41115 | -0.42108 |
| C | -3.57286 | 0.83277  | 1.18843  |
| H | -2.14387 | 2.41962  | 1.42099  |
| C | -2.88518 | -1.04547 | -0.15365 |
| H | -0.94714 | -0.87658 | -1.07260 |
| C | -3.84972 | -0.41921 | 0.65009  |
| H | -4.31217 | 1.31811  | 1.81951  |
| H | -4.78916 | -0.92755 | 0.84112  |
| O | -3.22538 | -2.27477 | -0.64219 |
| C | -2.25359 | -2.97925 | -1.40858 |
| H | -2.70524 | -3.94161 | -1.65281 |

|   |          |          |          |
|---|----------|----------|----------|
| H | -2.01037 | -2.44578 | -2.33544 |
| H | -1.33349 | -3.14112 | -0.83356 |
| C | 1.16884  | 1.01134  | -0.44548 |
| C | 1.62096  | -0.41894 | -0.57785 |
| H | 1.06207  | -0.94298 | -1.36497 |
| H | 2.66136  | -0.41611 | -0.91748 |
| C | 1.50127  | -1.22853 | 0.72864  |
| H | 2.10304  | -0.73998 | 1.50730  |
| H | 0.46137  | -1.17004 | 1.06752  |
| C | 1.90966  | -2.70905 | 0.59816  |
| H | 1.28906  | -3.30981 | 1.27573  |
| H | 1.67368  | -3.06084 | -0.41728 |
| C | 3.38088  | -3.01996 | 0.91578  |
| H | 3.57895  | -2.75214 | 1.96329  |
| H | 3.52775  | -4.10629 | 0.84640  |
| C | 4.40684  | -2.32108 | 0.01867  |
| H | 4.39102  | -1.23474 | 0.15698  |
| H | 5.42258  | -2.66567 | 0.24473  |
| H | 4.21164  | -2.52583 | -1.04126 |
| H | 3.09517  | 2.10405  | -0.76240 |

#### 4e\_conformer-222

|   |          |          |          |
|---|----------|----------|----------|
| C | -1.60037 | 2.71199  | 0.23713  |
| C | 0.12056  | 1.25270  | -0.04872 |
| N | -0.24064 | 2.54331  | 0.31245  |
| H | 0.40146  | 3.22744  | 0.68591  |
| C | -2.12551 | 1.51201  | -0.20743 |
| C | -2.26365 | 3.99808  | 0.60750  |
| H | -3.34004 | 3.92596  | 0.43002  |
| H | -2.11462 | 4.24707  | 1.66633  |
| H | -1.87980 | 4.84058  | 0.01825  |
| C | 1.52846  | 0.86329  | -0.10728 |
| C | 2.52543  | 1.81780  | -0.37862 |
| C | 1.91534  | -0.47419 | 0.10931  |
| C | 3.86759  | 1.43907  | -0.42822 |
| H | 2.25080  | 2.84774  | -0.58377 |
| C | 3.25945  | -0.84553 | 0.03689  |
| H | 1.16201  | -1.20442 | 0.36316  |
| C | 4.24599  | 0.11552  | -0.22806 |
| H | 4.62794  | 2.18546  | -0.64078 |
| H | 5.28535  | -0.19329 | -0.27189 |
| O | 3.70774  | -2.12142 | 0.22687  |
| C | 2.74199  | -3.13595 | 0.48353  |
| H | 3.30247  | -4.06760 | 0.57063  |
| H | 2.20178  | -2.94653 | 1.41904  |

|   |          |          |          |
|---|----------|----------|----------|
| H | 2.02064  | -3.21756 | -0.33859 |
| C | -1.05740 | 0.58161  | -0.38651 |
| C | -1.20268 | -0.82367 | -0.90258 |
| H | -1.99433 | -0.83941 | -1.65812 |
| H | -0.28226 | -1.12184 | -1.41890 |
| C | -1.50878 | -1.88452 | 0.18226  |
| H | -1.49113 | -2.87891 | -0.28624 |
| H | -0.68403 | -1.87526 | 0.90619  |
| C | -2.82727 | -1.71167 | 0.95898  |
| H | -2.70401 | -2.17584 | 1.94641  |
| H | -3.00100 | -0.64483 | 1.14920  |
| C | -4.07669 | -2.33482 | 0.31559  |
| H | -3.90712 | -3.41296 | 0.18315  |
| H | -4.90583 | -2.24463 | 1.03053  |
| C | -4.51659 | -1.72938 | -1.02142 |
| H | -3.79495 | -1.93277 | -1.81900 |
| H | -5.47979 | -2.14604 | -1.33833 |
| H | -4.63315 | -0.64130 | -0.94597 |
| H | -3.17299 | 1.32305  | -0.40333 |

#### 4e\_conformer-223

|   |          |          |          |
|---|----------|----------|----------|
| C | -0.68960 | 3.31837  | 0.00867  |
| C | 0.03015  | 1.17610  | 0.27637  |
| N | 0.40793  | 2.50211  | 0.11363  |
| H | 1.35916  | 2.83289  | 0.19007  |
| C | -1.80086 | 2.49697  | 0.07914  |
| C | -0.56794 | 4.80020  | -0.13481 |
| H | -0.07601 | 5.25810  | 0.73333  |
| H | 0.01405  | 5.07886  | -1.02257 |
| H | -1.56106 | 5.24734  | -0.23009 |
| C | 1.03961  | 0.12369  | 0.38367  |
| C | 0.78077  | -1.07771 | 1.07698  |
| C | 2.30501  | 0.29329  | -0.19816 |
| C | 1.76098  | -2.05818 | 1.16733  |
| H | -0.17717 | -1.22844 | 1.55898  |
| C | 3.29195  | -0.69348 | -0.09037 |
| H | 2.54138  | 1.18200  | -0.77478 |
| C | 3.02482  | -1.88498 | 0.59342  |
| H | 1.54887  | -2.97774 | 1.70586  |
| H | 3.77127  | -2.66437 | 0.68261  |
| O | 4.47901  | -0.40345 | -0.70064 |
| C | 5.51276  | -1.38098 | -0.64294 |
| H | 5.81151  | -1.58590 | 0.39214  |
| H | 5.20360  | -2.31774 | -1.12213 |
| H | 6.35715  | -0.95592 | -1.18708 |

|   |          |          |          |
|---|----------|----------|----------|
| C | -1.36705 | 1.15034  | 0.25234  |
| C | -2.28608 | -0.04185 | 0.29277  |
| H | -2.15321 | -0.61860 | 1.21779  |
| H | -3.31616 | 0.32983  | 0.32168  |
| C | -2.11752 | -0.98181 | -0.91509 |
| H | -2.38383 | -0.42642 | -1.82512 |
| H | -1.05657 | -1.24048 | -1.01207 |
| C | -2.93213 | -2.28177 | -0.85489 |
| H | -2.67194 | -2.87248 | -1.74291 |
| H | -2.60310 | -2.87678 | 0.00994  |
| C | -4.46425 | -2.11018 | -0.80050 |
| H | -4.74943 | -1.21727 | -1.37486 |
| H | -4.93534 | -2.95913 | -1.31257 |
| C | -5.04943 | -2.02579 | 0.61443  |
| H | -4.81207 | -2.93272 | 1.18409  |
| H | -4.65441 | -1.17354 | 1.17542  |
| H | -6.14097 | -1.92766 | 0.58402  |
| H | -2.83030 | 2.82559  | 0.00783  |

#### 4e\_conformer-224

|   |          |          |          |
|---|----------|----------|----------|
| C | 1.26568  | 2.34532  | 0.29528  |
| C | 0.01745  | 0.44318  | 0.30722  |
| N | 0.07864  | 1.77305  | -0.08919 |
| H | -0.60834 | 2.22193  | -0.67769 |
| C | 1.97241  | 1.37321  | 0.97863  |
| C | 1.61167  | 3.75915  | -0.03957 |
| H | 1.68714  | 3.91711  | -1.12339 |
| H | 0.86232  | 4.46513  | 0.34051  |
| H | 2.57634  | 4.02072  | 0.40347  |
| C | -1.18500 | -0.35244 | 0.06736  |
| C | -1.12719 | -1.74608 | -0.09573 |
| C | -2.44221 | 0.28637  | -0.00378 |
| C | -2.29664 | -2.47670 | -0.31444 |
| H | -0.17088 | -2.25241 | -0.08302 |
| C | -3.60257 | -0.45256 | -0.24063 |
| H | -2.50204 | 1.35427  | 0.16504  |
| C | -3.53298 | -1.84583 | -0.39275 |
| H | -2.23841 | -3.55427 | -0.44072 |
| H | -4.44759 | -2.40243 | -0.56955 |
| O | -4.85304 | 0.08958  | -0.32455 |
| C | -4.98159 | 1.50060  | -0.18487 |
| H | -4.65076 | 1.83620  | 0.80552  |
| H | -4.41021 | 2.03169  | -0.95579 |
| H | -6.04375 | 1.71759  | -0.30503 |
| C | 1.20626  | 0.16875  | 0.98577  |

|   |         |          |          |
|---|---------|----------|----------|
| C | 1.62395 | -1.11293 | 1.65158  |
| H | 2.20839 | -0.85848 | 2.54580  |
| H | 0.73855 | -1.65539 | 2.00556  |
| C | 2.47938 | -2.07818 | 0.79752  |
| H | 2.76490 | -2.91615 | 1.44633  |
| H | 1.86761 | -2.51143 | -0.00504 |
| C | 3.73864 | -1.45006 | 0.17290  |
| H | 4.13343 | -0.67472 | 0.84466  |
| H | 4.52717 | -2.21116 | 0.09600  |
| C | 3.50981 | -0.84985 | -1.22070 |
| H | 3.23421 | -1.65943 | -1.91155 |
| H | 2.65613 | -0.16536 | -1.18765 |
| C | 4.73815 | -0.11027 | -1.75403 |
| H | 4.99050 | 0.73982  | -1.10793 |
| H | 5.61485 | -0.76926 | -1.79158 |
| H | 4.56773 | 0.27778  | -2.76495 |
| H | 2.94520 | 1.51020  | 1.43313  |

4e\_conformer-225

|   |          |          |          |
|---|----------|----------|----------|
| C | 3.53970  | -0.47870 | 0.43653  |
| C | 1.34358  | -0.68414 | -0.11136 |
| N | 2.45593  | -1.32448 | 0.41470  |
| H | 2.43161  | -2.24586 | 0.82833  |
| C | 3.12226  | 0.71608  | -0.11739 |
| C | 4.86160  | -0.89690 | 0.99327  |
| H | 5.58858  | -0.08926 | 0.87172  |
| H | 4.80105  | -1.13444 | 2.06352  |
| H | 5.25711  | -1.78575 | 0.48528  |
| C | 0.07432  | -1.41345 | -0.24790 |
| C | 0.05309  | -2.68131 | -0.84945 |
| C | -1.12246 | -0.87474 | 0.25952  |
| C | -1.14788 | -3.38593 | -0.95587 |
| H | 0.97135  | -3.10001 | -1.24943 |
| C | -2.31832 | -1.59144 | 0.15665  |
| H | -1.09246 | 0.08327  | 0.75979  |
| C | -2.33264 | -2.84995 | -0.46266 |
| H | -1.16027 | -4.36347 | -1.42968 |
| H | -3.27149 | -3.39029 | -0.52921 |
| O | -3.51727 | -1.16085 | 0.64905  |
| C | -3.52393 | -0.01562 | 1.49731  |
| H | -4.54669 | 0.07689  | 1.86516  |
| H | -2.83922 | -0.14631 | 2.34377  |
| H | -3.25411 | 0.89417  | 0.95160  |
| C | 1.74036  | 0.59972  | -0.47054 |
| C | 0.95002  | 1.63583  | -1.22304 |

|   |          |         |          |
|---|----------|---------|----------|
| H | 1.44878  | 1.82652 | -2.18409 |
| H | -0.03855 | 1.23663 | -1.46770 |
| C | 0.81117  | 2.98236 | -0.47852 |
| H | 1.79736  | 3.25760 | -0.08570 |
| H | 0.54256  | 3.76772 | -1.19786 |
| C | -0.21971 | 2.96393 | 0.66464  |
| H | -0.25704 | 1.95371 | 1.09290  |
| H | 0.11878  | 3.61623 | 1.47961  |
| C | -1.63180 | 3.42252 | 0.25774  |
| H | -2.30410 | 3.28912 | 1.11636  |
| H | -1.60222 | 4.50366 | 0.06273  |
| C | -2.23469 | 2.72917 | -0.96970 |
| H | -2.27107 | 1.64083 | -0.85136 |
| H | -3.25804 | 3.07950 | -1.14640 |
| H | -1.65437 | 2.93962 | -1.87441 |
| H | 3.75113  | 1.58342 | -0.27546 |

4e\_conformer-226

|   |          |          |          |
|---|----------|----------|----------|
| C | 2.72140  | -1.85338 | 0.04539  |
| C | 0.61589  | -1.01123 | 0.24146  |
| N | 1.40131  | -2.02983 | -0.28385 |
| H | 1.06093  | -2.74391 | -0.91111 |
| C | 2.78670  | -0.71068 | 0.82086  |
| C | 3.78873  | -2.78731 | -0.42291 |
| H | 3.59981  | -3.81932 | -0.10086 |
| H | 3.87218  | -2.79812 | -1.51746 |
| H | 4.75632  | -2.47986 | -0.01731 |
| C | -0.83722 | -1.04524 | 0.08551  |
| C | -1.50482 | -2.27328 | -0.12508 |
| C | -1.61027 | 0.12230  | 0.14139  |
| C | -2.88488 | -2.30626 | -0.27944 |
| H | -0.94549 | -3.20324 | -0.13320 |
| C | -3.00252 | 0.07875  | 0.00041  |
| H | -1.14810 | 1.09095  | 0.27157  |
| C | -3.65433 | -1.13982 | -0.21820 |
| H | -3.38288 | -3.25882 | -0.43803 |
| H | -4.72934 | -1.19335 | -0.33687 |
| O | -3.63346 | 1.28793  | 0.07784  |
| C | -5.04807 | 1.31131  | -0.08108 |
| H | -5.34538 | 0.93273  | -1.06651 |
| H | -5.54746 | 0.72269  | 0.69791  |
| H | -5.34227 | 2.35770  | 0.00998  |
| C | 1.47565  | -0.16131 | 0.94202  |
| C | 1.13919  | 1.06839  | 1.74046  |
| H | 0.16733  | 0.93431  | 2.23337  |

|   |         |          |          |
|---|---------|----------|----------|
| H | 1.88014 | 1.16065  | 2.54569  |
| C | 1.10276 | 2.41628  | 0.98489  |
| H | 0.26779 | 2.42785  | 0.27579  |
| H | 0.86770 | 3.18776  | 1.73030  |
| C | 2.38714 | 2.83378  | 0.24894  |
| H | 2.33165 | 3.91816  | 0.07682  |
| H | 3.25045 | 2.67602  | 0.91126  |
| C | 2.66296 | 2.15660  | -1.10650 |
| H | 3.55299 | 2.63192  | -1.54174 |
| H | 2.91638 | 1.10391  | -0.95478 |
| C | 1.50601 | 2.25477  | -2.10576 |
| H | 0.64352 | 1.66193  | -1.78197 |
| H | 1.17027 | 3.29241  | -2.23112 |
| H | 1.80839 | 1.88072  | -3.09075 |
| H | 3.68744 | -0.29975 | 1.25918  |

#### 4e\_conformer-227

|   |          |          |          |
|---|----------|----------|----------|
| C | -0.02917 | 3.48364  | -0.13846 |
| C | -0.13392 | 1.22945  | -0.41776 |
| N | -0.86313 | 2.40186  | -0.27997 |
| H | -1.86387 | 2.46208  | -0.40515 |
| C | 1.26373  | 2.99090  | -0.15267 |
| C | -0.55020 | 4.87865  | -0.02039 |
| H | 0.28071  | 5.57517  | 0.12058  |
| H | -1.09968 | 5.19022  | -0.91844 |
| H | -1.23189 | 4.99005  | 0.83249  |
| C | -0.80919 | -0.06170 | -0.55033 |
| C | -0.28443 | -1.07644 | -1.36562 |
| C | -2.01645 | -0.29653 | 0.13916  |
| C | -0.94245 | -2.30305 | -1.46989 |
| H | 0.61667  | -0.89398 | -1.93860 |
| C | -2.67639 | -1.52149 | 0.01330  |
| H | -2.40656 | 0.47374  | 0.79301  |
| C | -2.13345 | -2.53548 | -0.79024 |
| H | -0.52703 | -3.08257 | -2.10240 |
| H | -2.65770 | -3.48248 | -0.86717 |
| O | -3.84580 | -1.83061 | 0.64609  |
| C | -4.44317 | -0.83593 | 1.47161  |
| H | -5.36106 | -1.28025 | 1.85853  |
| H | -3.78809 | -0.56495 | 2.30840  |
| H | -4.68721 | 0.06565  | 0.89689  |
| C | 1.21442  | 1.57633  | -0.33194 |
| C | 2.40457  | 0.65697  | -0.26049 |
| H | 2.41429  | -0.05760 | -1.08906 |
| H | 3.31555  | 1.25857  | -0.37388 |

|   |         |          |          |
|---|---------|----------|----------|
| C | 2.48501 | -0.10121 | 1.08052  |
| H | 2.46702 | 0.64847  | 1.88147  |
| H | 1.57512 | -0.70275 | 1.20816  |
| C | 3.73166 | -0.99591 | 1.23760  |
| H | 4.55952 | -0.57120 | 0.65092  |
| H | 4.06042 | -0.96821 | 2.28449  |
| C | 3.53804 | -2.46993 | 0.84883  |
| H | 4.46901 | -3.01092 | 1.06620  |
| H | 2.77050 | -2.90914 | 1.50186  |
| C | 3.14779 | -2.71153 | -0.61200 |
| H | 3.86445 | -2.24190 | -1.29719 |
| H | 3.12206 | -3.78394 | -0.83818 |
| H | 2.15544 | -2.30682 | -0.83239 |
| H | 2.16237 | 3.58423  | -0.03691 |

4e\_conformer-228

|   |          |          |          |
|---|----------|----------|----------|
| C | -2.02962 | 2.91616  | -0.25751 |
| C | -0.30541 | 1.43546  | -0.14037 |
| N | -0.69388 | 2.75976  | 0.01263  |
| H | -0.05212 | 3.52231  | 0.17572  |
| C | -2.52005 | 1.65943  | -0.56543 |
| C | -2.70025 | 4.24993  | -0.20690 |
| H | -3.76584 | 4.13889  | -0.42483 |
| H | -2.60506 | 4.71851  | 0.78098  |
| H | -2.27922 | 4.94980  | -0.94058 |
| C | 1.07602  | 1.03454  | 0.12199  |
| C | 1.88015  | 1.76898  | 1.02120  |
| C | 1.64263  | -0.07756 | -0.51555 |
| C | 3.19593  | 1.38867  | 1.25681  |
| H | 1.46281  | 2.61484  | 1.55853  |
| C | 2.96346  | -0.46316 | -0.26116 |
| H | 1.07542  | -0.65558 | -1.23466 |
| C | 3.75635  | 0.27284  | 0.62743  |
| H | 3.80180  | 1.96007  | 1.95463  |
| H | 4.78173  | -0.00701 | 0.83440  |
| O | 3.39090  | -1.56729 | -0.94274 |
| C | 4.73257  | -1.99764 | -0.73847 |
| H | 5.45027  | -1.22389 | -1.03680 |
| H | 4.90966  | -2.27027 | 0.30891  |
| H | 4.86394  | -2.87749 | -1.36967 |
| C | -1.44993 | 0.71991  | -0.50223 |
| C | -1.61184 | -0.76468 | -0.69136 |
| H | -2.62500 | -0.95180 | -1.06115 |
| H | -0.94118 | -1.14511 | -1.47305 |
| C | -1.37039 | -1.57740 | 0.59602  |



|   |          |          |          |
|---|----------|----------|----------|
| H | -0.34360 | -1.38642 | 0.92747  |
| H | -2.02330 | -1.18938 | 1.38990  |
| C | -1.58697 | -3.09513 | 0.43388  |
| H | -1.35053 | -3.38667 | -0.60006 |
| H | -0.86877 | -3.63011 | 1.06861  |
| C | -2.99423 | -3.59638 | 0.79527  |
| H | -3.01064 | -4.68995 | 0.69358  |
| H | -3.18051 | -3.38623 | 1.85804  |
| C | -4.13325 | -3.00148 | -0.03815 |
| H | -3.96443 | -3.15955 | -1.11054 |
| H | -5.09170 | -3.46552 | 0.22184  |
| H | -4.23482 | -1.92356 | 0.12806  |
| H | -3.55001 | 1.42923  | -0.80848 |

4e\_conformer-229

|   |          |          |          |
|---|----------|----------|----------|
| C | 2.02960  | 2.91617  | -0.25751 |
| C | 0.30540  | 1.43545  | -0.14038 |
| N | 0.69385  | 2.75976  | 0.01263  |
| H | 0.05209  | 3.52231  | 0.17572  |
| C | 2.52004  | 1.65944  | -0.56543 |
| C | 2.70022  | 4.24994  | -0.20690 |
| H | 3.76581  | 4.13891  | -0.42483 |
| H | 2.27918  | 4.94982  | -0.94058 |
| H | 2.60503  | 4.71852  | 0.78098  |
| C | -1.07603 | 1.03453  | 0.12199  |
| C | -1.88016 | 1.76897  | 1.02120  |
| C | -1.64263 | -0.07757 | -0.51555 |
| C | -3.19594 | 1.38865  | 1.25682  |
| H | -1.46282 | 2.61482  | 1.55853  |
| C | -2.96346 | -0.46318 | -0.26116 |
| H | -1.07543 | -0.65558 | -1.23466 |
| C | -3.75635 | 0.27282  | 0.62743  |
| H | -3.80181 | 1.96004  | 1.95464  |
| H | -4.78174 | -0.00704 | 0.83441  |
| O | -3.39091 | -1.56731 | -0.94274 |
| C | -4.73257 | -1.99766 | -0.73847 |
| H | -4.86394 | -2.87751 | -1.36967 |
| H | -4.90966 | -2.27030 | 0.30891  |
| H | -5.45028 | -1.22391 | -1.03679 |
| C | 1.44992  | 0.71991  | -0.50224 |
| C | 1.61184  | -0.76468 | -0.69136 |
| H | 0.94118  | -1.14511 | -1.47304 |
| H | 2.62500  | -0.95179 | -1.06116 |
| C | 1.37041  | -1.57739 | 0.59603  |
| H | 2.02333  | -1.18936 | 1.38990  |

|   |         |          |          |
|---|---------|----------|----------|
| H | 0.34363 | -1.38642 | 0.92748  |
| C | 1.58700 | -3.09512 | 0.43389  |
| H | 0.86882 | -3.63010 | 1.06863  |
| H | 1.35056 | -3.38667 | -0.60005 |
| C | 2.99427 | -3.59635 | 0.79526  |
| H | 3.18056 | -3.38620 | 1.85803  |
| H | 3.01070 | -4.68993 | 0.69359  |
| C | 4.13328 | -3.00145 | -0.03817 |
| H | 3.96445 | -3.15952 | -1.11055 |
| H | 4.23484 | -1.92352 | 0.12803  |
| H | 5.09174 | -3.46548 | 0.22182  |
| H | 3.54999 | 1.42925  | -0.80848 |

4e\_conformer-230

|   |          |          |          |
|---|----------|----------|----------|
| C | 0.81157  | 3.44390  | -0.39485 |
| C | -0.34607 | 1.51555  | -0.07459 |
| N | -0.43408 | 2.89094  | -0.23645 |
| H | -1.30257 | 3.39576  | -0.34004 |
| C | 1.72432  | 2.40729  | -0.30636 |
| C | 1.00887  | 4.90712  | -0.62190 |
| H | 0.59892  | 5.50792  | 0.20007  |
| H | 2.07619  | 5.13045  | -0.70126 |
| H | 0.52518  | 5.24846  | -1.54646 |
| C | -1.54040 | 0.70150  | 0.13406  |
| C | -2.68655 | 1.24202  | 0.74398  |
| C | -1.56557 | -0.64512 | -0.28248 |
| C | -3.82182 | 0.45242  | 0.93031  |
| H | -2.67989 | 2.26694  | 1.10171  |
| C | -2.69935 | -1.43197 | -0.06952 |
| H | -0.70669 | -1.05191 | -0.79633 |
| C | -3.83899 | -0.88148 | 0.53526  |
| H | -4.70074 | 0.87983  | 1.40492  |
| H | -4.71175 | -1.50876 | 0.68474  |
| O | -2.79507 | -2.74524 | -0.43241 |
| C | -1.64694 | -3.36558 | -1.00213 |
| H | -1.36979 | -2.89902 | -1.95522 |
| H | -0.79090 | -3.32373 | -0.31778 |
| H | -1.92381 | -4.40623 | -1.17577 |
| C | 1.01083  | 1.18782  | -0.10550 |
| C | 1.61422  | -0.17847 | 0.08960  |
| H | 0.95782  | -0.77857 | 0.73267  |
| H | 1.65354  | -0.71049 | -0.87143 |
| C | 3.02319  | -0.15508 | 0.69839  |
| H | 3.71852  | 0.31227  | -0.01230 |
| H | 3.01125  | 0.49243  | 1.58505  |

|   |         |          |          |
|---|---------|----------|----------|
| C | 3.57607 | -1.53043 | 1.10098  |
| H | 4.54975 | -1.36383 | 1.57965  |
| H | 2.93015 | -1.97018 | 1.87507  |
| C | 3.75611 | -2.54676 | -0.04558 |
| H | 4.05169 | -2.01370 | -0.96045 |
| H | 4.59644 | -3.20868 | 0.20049  |
| C | 2.53159 | -3.42573 | -0.33026 |
| H | 2.23643 | -3.98054 | 0.56883  |
| H | 1.66669 | -2.83907 | -0.65330 |
| H | 2.74774 | -4.15741 | -1.11747 |
| H | 2.79832 | 2.52137  | -0.36735 |

4e\_conformer-231

|   |          |          |          |
|---|----------|----------|----------|
| C | 1.56170  | 2.33707  | 0.28107  |
| C | 0.14004  | 0.56171  | 0.33123  |
| N | 0.31926  | 1.87693  | -0.07688 |
| H | -0.33716 | 2.38773  | -0.64939 |
| C | 2.18714  | 1.30627  | 0.95774  |
| C | 2.03205  | 3.71084  | -0.06877 |
| H | 2.08632  | 3.86117  | -1.15488 |
| H | 1.36807  | 4.48626  | 0.33408  |
| H | 3.03169  | 3.87719  | 0.34150  |
| C | -1.13686 | -0.11712 | 0.11826  |
| C | -1.21719 | -1.51888 | -0.01685 |
| C | -2.32589 | 0.62501  | 0.04186  |
| C | -2.44876 | -2.13349 | -0.21135 |
| H | -0.31494 | -2.11589 | 0.00094  |
| C | -3.55973 | 0.00008  | -0.17063 |
| H | -2.32242 | 1.70186  | 0.17795  |
| C | -3.63156 | -1.39258 | -0.29429 |
| H | -2.49578 | -3.21392 | -0.31667 |
| H | -4.57652 | -1.89717 | -0.45265 |
| O | -4.63839 | 0.83621  | -0.22678 |
| C | -5.92320 | 0.25280  | -0.41773 |
| H | -5.98001 | -0.28517 | -1.37166 |
| H | -6.17563 | -0.43330 | 0.39972  |
| H | -6.63044 | 1.08317  | -0.42659 |
| C | 1.31110  | 0.17978  | 0.98867  |
| C | 1.62272  | -1.13244 | 1.65348  |
| H | 2.25041  | -0.92978 | 2.53147  |
| H | 0.69998  | -1.58790 | 2.03350  |
| C | 2.36266  | -2.17708 | 0.78529  |
| H | 2.57724  | -3.03887 | 1.43024  |
| H | 1.69605  | -2.54817 | -0.00468 |
| C | 3.66549  | -1.67591 | 0.13559  |

|   |         |          |          |
|---|---------|----------|----------|
| H | 4.14727 | -0.94295 | 0.79818  |
| H | 4.37362 | -2.51108 | 0.04599  |
| C | 3.47162 | -1.05711 | -1.25516 |
| H | 3.10053 | -1.83500 | -1.93768 |
| H | 2.69382 | -0.28825 | -1.20785 |
| C | 4.75880 | -0.44899 | -1.81529 |
| H | 5.56161 | -1.19527 | -1.86887 |
| H | 4.60876 | -0.04598 | -2.82357 |
| H | 5.11125 | 0.37078  | -1.17687 |
| H | 3.17782 | 1.35263  | 1.39142  |

4e\_conformer-232

|   |          |          |          |
|---|----------|----------|----------|
| C | -0.59193 | 3.37038  | -0.39949 |
| C | 0.51080  | 1.41394  | -0.05896 |
| N | 0.63958  | 2.77712  | -0.28329 |
| H | 1.51877  | 3.24398  | -0.45343 |
| C | -1.53533 | 2.37357  | -0.22001 |
| C | -0.74836 | 4.82973  | -0.67735 |
| H | -0.27222 | 5.44703  | 0.09525  |
| H | -0.30441 | 5.11475  | -1.64015 |
| H | -1.80964 | 5.09057  | -0.70880 |
| C | 1.68411  | 0.56271  | 0.11641  |
| C | 2.88258  | 1.07963  | 0.64011  |
| C | 1.63485  | -0.79810 | -0.24824 |
| C | 3.99610  | 0.25284  | 0.79379  |
| H | 2.93499  | 2.11674  | 0.95669  |
| C | 2.74903  | -1.62054 | -0.06984 |
| H | 0.73245  | -1.18969 | -0.69499 |
| C | 3.94099  | -1.09410 | 0.44954  |
| H | 4.91611  | 0.66210  | 1.20188  |
| H | 4.79707  | -1.74931 | 0.57360  |
| O | 2.77430  | -2.94859 | -0.38793 |
| C | 1.57926  | -3.53610 | -0.89259 |
| H | 0.75251  | -3.43474 | -0.17895 |
| H | 1.28608  | -3.08792 | -1.84969 |
| H | 1.80496  | -4.59284 | -1.04129 |
| C | -0.85679 | 1.13655  | -0.00536 |
| C | -1.49576 | -0.19735 | 0.28234  |
| H | -1.57400 | -0.78852 | -0.63968 |
| H | -0.83964 | -0.77852 | 0.94334  |
| C | -2.88124 | -0.09824 | 0.93937  |
| H | -2.78104 | 0.51313  | 1.84508  |
| H | -3.57027 | 0.44774  | 0.28082  |
| C | -3.50182 | -1.46123 | 1.30517  |
| H | -2.70034 | -2.16318 | 1.57854  |

|   |          |          |          |
|---|----------|----------|----------|
| H | -4.11543 | -1.33884 | 2.20691  |
| C | -4.38963 | -2.09856 | 0.22428  |
| H | -5.23603 | -1.42709 | 0.02160  |
| H | -4.82411 | -3.01936 | 0.63627  |
| C | -3.68686 | -2.42998 | -1.09584 |
| H | -4.35777 | -2.97707 | -1.76828 |
| H | -3.36383 | -1.52498 | -1.62123 |
| H | -2.79979 | -3.05324 | -0.92744 |
| H | -2.60599 | 2.52723  | -0.22954 |

#### 4e\_conformer-233

|   |          |          |          |
|---|----------|----------|----------|
| C | 0.59196  | 3.37037  | -0.39952 |
| C | -0.51079 | 1.41394  | -0.05897 |
| N | -0.63956 | 2.77713  | -0.28330 |
| H | -1.51874 | 3.24398  | -0.45347 |
| C | 1.53535  | 2.37355  | -0.22004 |
| C | 0.74840  | 4.82972  | -0.67738 |
| H | 0.30445  | 5.11474  | -1.64018 |
| H | 0.27226  | 5.44702  | 0.09522  |
| H | 1.80968  | 5.09055  | -0.70883 |
| C | -1.68411 | 0.56272  | 0.11641  |
| C | -2.88254 | 1.07964  | 0.64019  |
| C | -1.63488 | -0.79807 | -0.24827 |
| C | -3.99607 | 0.25285  | 0.79389  |
| H | -2.93493 | 2.11673  | 0.95680  |
| C | -2.74905 | -1.62051 | -0.06985 |
| H | -0.73249 | -1.18967 | -0.69507 |
| C | -3.94099 | -1.09407 | 0.44959  |
| H | -4.91606 | 0.66211  | 1.20202  |
| H | -4.79706 | -1.74928 | 0.57366  |
| O | -2.77435 | -2.94856 | -0.38797 |
| C | -1.57932 | -3.53606 | -0.89268 |
| H | -0.75254 | -3.43467 | -0.17909 |
| H | -1.80502 | -4.59280 | -1.04136 |
| H | -1.28620 | -3.08789 | -1.84981 |
| C | 0.85680  | 1.13654  | -0.00538 |
| C | 1.49576  | -0.19737 | 0.28231  |
| H | 0.83961  | -0.77855 | 0.94329  |
| H | 1.57403  | -0.78852 | -0.63971 |
| C | 2.88121  | -0.09827 | 0.93940  |
| H | 3.57026  | 0.44772  | 0.28088  |
| H | 2.78098  | 0.51309  | 1.84511  |
| C | 3.50178  | -1.46127 | 1.30520  |
| H | 4.11537  | -1.33889 | 2.20695  |
| H | 2.70030  | -2.16322 | 1.57854  |

|   |         |          |          |
|---|---------|----------|----------|
| C | 4.38962 | -2.09858 | 0.22433  |
| H | 5.23603 | -1.42712 | 0.02167  |
| H | 4.82409 | -3.01939 | 0.63632  |
| C | 3.68689 | -2.43000 | -1.09582 |
| H | 2.79982 | -3.05327 | -0.92744 |
| H | 3.36386 | -1.52501 | -1.62121 |
| H | 4.35781 | -2.97709 | -1.76824 |
| H | 2.60601 | 2.52720  | -0.22957 |

4e\_conformer-234

|   |          |          |          |
|---|----------|----------|----------|
| C | 0.27882  | 3.41037  | -0.17574 |
| C | 0.24505  | 1.14134  | -0.34040 |
| N | 1.04194  | 2.27809  | -0.31284 |
| H | 2.03325  | 2.27861  | -0.50680 |
| C | -1.03711 | 2.99211  | -0.08236 |
| C | 0.88060  | 4.77745  | -0.16290 |
| H | 1.62133  | 4.89081  | 0.63892  |
| H | 1.38640  | 5.01312  | -1.10846 |
| H | 0.09934  | 5.52621  | -0.00694 |
| C | 0.84416  | -0.18879 | -0.44490 |
| C | 0.16463  | -1.25444 | -1.05851 |
| C | 2.13665  | -0.41792 | 0.07275  |
| C | 0.76037  | -2.51376 | -1.13922 |
| H | -0.81449 | -1.09460 | -1.49242 |
| C | 2.72961  | -1.67838 | -0.02874 |
| H | 2.65054  | 0.38633  | 0.58435  |
| C | 2.03685  | -2.73737 | -0.63405 |
| H | 0.22444  | -3.32961 | -1.61632 |
| H | 2.51217  | -3.71094 | -0.69519 |
| O | 3.97365  | -1.97996 | 0.44652  |
| C | 4.72454  | -0.93999 | 1.06442  |
| H | 4.90120  | -0.10903 | 0.37080  |
| H | 4.21970  | -0.56096 | 1.96127  |
| H | 5.67843  | -1.38714 | 1.34701  |
| C | -1.07535 | 1.57135  | -0.18920 |
| C | -2.31205 | 0.72603  | -0.04149 |
| H | -3.19142 | 1.38280  | -0.04798 |
| H | -2.43155 | 0.06116  | -0.90270 |
| C | -2.31658 | -0.10551 | 1.25402  |
| H | -1.41572 | -0.73174 | 1.27329  |
| H | -2.23012 | 0.58462  | 2.10377  |
| C | -3.54711 | -1.00229 | 1.45088  |
| H | -3.46750 | -1.45651 | 2.44690  |
| H | -4.45661 | -0.38432 | 1.47291  |
| C | -3.71086 | -2.12137 | 0.39849  |

|   |          |          |          |
|---|----------|----------|----------|
| H | -2.72022 | -2.40209 | 0.01352  |
| H | -4.10736 | -3.02007 | 0.88790  |
| C | -4.63953 | -1.76733 | -0.76907 |
| H | -4.71733 | -2.59937 | -1.47877 |
| H | -5.64969 | -1.54400 | -0.40446 |
| H | -4.29024 | -0.88967 | -1.32239 |
| H | -1.89355 | 3.64041  | 0.05551  |

4e\_conformer-235

|   |          |          |          |
|---|----------|----------|----------|
| C | -0.27880 | 3.41038  | -0.17574 |
| C | -0.24505 | 1.14135  | -0.34040 |
| N | -1.04193 | 2.27809  | -0.31284 |
| H | -2.03324 | 2.27862  | -0.50681 |
| C | 1.03713  | 2.99211  | -0.08236 |
| C | -0.88058 | 4.77746  | -0.16291 |
| H | -0.09931 | 5.52621  | -0.00696 |
| H | -1.38639 | 5.01312  | -1.10846 |
| H | -1.62130 | 4.89083  | 0.63893  |
| C | -0.84415 | -0.18879 | -0.44490 |
| C | -0.16463 | -1.25443 | -1.05852 |
| C | -2.13665 | -0.41791 | 0.07275  |
| C | -0.76038 | -2.51375 | -1.13923 |
| H | 0.81448  | -1.09459 | -1.49244 |
| C | -2.72961 | -1.67837 | -0.02874 |
| H | -2.65053 | 0.38633  | 0.58435  |
| C | -2.03686 | -2.73736 | -0.63406 |
| H | -0.22445 | -3.32961 | -1.61633 |
| H | -2.51218 | -3.71093 | -0.69520 |
| O | -3.97365 | -1.97995 | 0.44652  |
| C | -4.72454 | -0.93998 | 1.06443  |
| H | -5.67843 | -1.38713 | 1.34703  |
| H | -4.21968 | -0.56096 | 1.96128  |
| H | -4.90119 | -0.10901 | 0.37082  |
| C | 1.07536  | 1.57135  | -0.18919 |
| C | 2.31205  | 0.72602  | -0.04148 |
| H | 2.43154  | 0.06114  | -0.90269 |
| H | 3.19143  | 1.38278  | -0.04799 |
| C | 2.31659  | -0.10551 | 1.25404  |
| H | 2.23014  | 0.58463  | 2.10378  |
| H | 1.41571  | -0.73171 | 1.27332  |
| C | 3.54709  | -1.00231 | 1.45088  |
| H | 4.45661  | -0.38436 | 1.47291  |
| H | 3.46748  | -1.45653 | 2.44690  |
| C | 3.71082  | -2.12138 | 0.39848  |
| H | 4.10727  | -3.02010 | 0.88788  |

|   |         |          |          |
|---|---------|----------|----------|
| H | 2.72017 | -2.40206 | 0.01349  |
| C | 4.63952 | -1.76736 | -0.76907 |
| H | 5.64968 | -1.54408 | -0.40444 |
| H | 4.71728 | -2.59939 | -1.47878 |
| H | 4.29026 | -0.88967 | -1.32237 |
| H | 1.89357 | 3.64040  | 0.05551  |

4e\_conformer-236

|   |          |          |          |
|---|----------|----------|----------|
| C | -1.25088 | 2.53661  | 0.11476  |
| C | -0.13468 | 0.56071  | 0.29246  |
| N | -0.09627 | 1.86191  | -0.19331 |
| H | 0.63229  | 2.22232  | -0.79225 |
| C | -2.03941 | 1.66161  | 0.83838  |
| C | -1.48895 | 3.94445  | -0.32355 |
| H | -0.70919 | 4.62431  | 0.04274  |
| H | -1.51169 | 4.03454  | -1.41741 |
| H | -2.45020 | 4.29629  | 0.06044  |
| C | 1.02899  | -0.31398 | 0.15695  |
| C | 0.90912  | -1.71317 | 0.13952  |
| C | 2.31730  | 0.25382  | 0.04280  |
| C | 2.04471  | -2.51553 | 0.01352  |
| H | -0.06741 | -2.17347 | 0.19793  |
| C | 3.44375  | -0.55795 | -0.09925 |
| H | 2.42925  | 1.32881  | 0.10489  |
| C | 3.31043  | -1.95478 | -0.11128 |
| H | 1.93583  | -3.59646 | -0.00105 |
| H | 4.19929  | -2.56822 | -0.21682 |
| O | 4.71916  | -0.08468 | -0.21705 |
| C | 4.91275  | 1.32583  | -0.21769 |
| H | 4.37578  | 1.80204  | -1.04699 |
| H | 4.58718  | 1.77453  | 0.72866  |
| H | 5.98527  | 1.48048  | -0.34216 |
| C | -1.36018 | 0.41130  | 0.94654  |
| C | -1.88402 | -0.78215 | 1.69773  |
| H | -1.05151 | -1.29898 | 2.19288  |
| H | -2.53800 | -0.41594 | 2.50040  |
| C | -2.67899 | -1.83564 | 0.89339  |
| H | -2.01925 | -2.33859 | 0.17780  |
| H | -2.98473 | -2.61096 | 1.60867  |
| C | -3.93464 | -1.34481 | 0.15333  |
| H | -4.55164 | -2.22728 | -0.06850 |
| H | -4.53294 | -0.71998 | 0.83198  |
| C | -3.71231 | -0.58300 | -1.16664 |
| H | -4.69768 | -0.40675 | -1.61993 |
| H | -3.28350 | 0.40190  | -0.96339 |



|   |          |          |          |
|---|----------|----------|----------|
| C | -2.82254 | -1.31680 | -2.17475 |
| H | -3.17432 | -2.34177 | -2.35041 |
| H | -2.81531 | -0.79677 | -3.13968 |
| H | -1.78543 | -1.37466 | -1.82662 |
| H | -3.01413 | 1.88948  | 1.25106  |

4e\_conformer-237

|   |          |          |          |
|---|----------|----------|----------|
| C | 0.37010  | 2.97795  | -0.24316 |
| C | -0.28334 | 0.80116  | -0.16337 |
| N | -0.68970 | 2.11320  | -0.36702 |
| H | -1.60946 | 2.37777  | -0.68959 |
| C | 1.47507  | 2.21066  | 0.07755  |
| C | 0.22138  | 4.44957  | -0.45210 |
| H | -0.09316 | 4.68917  | -1.47632 |
| H | -0.52238 | 4.88609  | 0.22670  |
| H | 1.17658  | 4.94960  | -0.27080 |
| C | -1.24504 | -0.29881 | -0.21235 |
| C | -0.86966 | -1.58267 | -0.64085 |
| C | -2.58509 | -0.07411 | 0.16899  |
| C | -1.81005 | -2.61414 | -0.67185 |
| H | 0.14311  | -1.76557 | -0.97854 |
| C | -3.52091 | -1.10892 | 0.11562  |
| H | -2.87130 | 0.90343  | 0.53708  |
| C | -3.13158 | -2.39088 | -0.30173 |
| H | -1.50937 | -3.60329 | -1.00598 |
| H | -3.87297 | -3.18283 | -0.32918 |
| O | -4.83409 | -0.97401 | 0.46455  |
| C | -5.28597 | 0.30888  | 0.88545  |
| H | -4.77045 | 0.63509  | 1.79683  |
| H | -5.14127 | 1.06038  | 0.09987  |
| H | -6.35135 | 0.19816  | 1.09134  |
| C | 1.07916  | 0.84036  | 0.13150  |
| C | 1.98376  | -0.30696 | 0.47951  |
| H | 2.63257  | -0.01242 | 1.31206  |
| H | 1.39366  | -1.15893 | 0.83765  |
| C | 2.85702  | -0.77112 | -0.70397 |
| H | 2.18902  | -1.08472 | -1.51646 |
| H | 3.41636  | 0.08923  | -1.09678 |
| C | 3.83163  | -1.91572 | -0.36116 |
| H | 3.40058  | -2.53037 | 0.44266  |
| H | 3.92606  | -2.57943 | -1.23011 |
| C | 5.24580  | -1.46827 | 0.04154  |
| H | 5.85970  | -2.36391 | 0.20694  |
| H | 5.70200  | -0.93824 | -0.80655 |
| C | 5.31928  | -0.57731 | 1.28515  |

|   |         |          |         |
|---|---------|----------|---------|
| H | 4.82148 | 0.38488  | 1.12279 |
| H | 4.84133 | -1.05912 | 2.14703 |
| H | 6.36083 | -0.36679 | 1.55413 |
| H | 2.46980 | 2.59360  | 0.26926 |

4e\_conformer-238

|   |          |          |          |
|---|----------|----------|----------|
| C | 0.48195  | 3.15660  | -0.23002 |
| C | -0.05007 | 0.95915  | 0.00947  |
| N | -0.47852 | 2.19871  | -0.44639 |
| H | -1.31909 | 2.33998  | -0.98863 |
| C | 1.53371  | 2.52851  | 0.40950  |
| C | 0.30265  | 4.57330  | -0.66870 |
| H | 0.21312  | 4.65743  | -1.75973 |
| H | -0.59758 | 5.02516  | -0.23309 |
| H | 1.16353  | 5.17114  | -0.35753 |
| C | -0.93082 | -0.20701 | -0.08803 |
| C | -0.42772 | -1.48257 | -0.38340 |
| C | -2.31962 | -0.04802 | 0.09818  |
| C | -1.29169 | -2.57559 | -0.46940 |
| H | 0.62946  | -1.60909 | -0.57652 |
| C | -3.17797 | -1.14488 | -0.00868 |
| H | -2.70645 | 0.93038  | 0.35528  |
| C | -2.66143 | -2.41963 | -0.28687 |
| H | -0.89147 | -3.55934 | -0.69899 |
| H | -3.34512 | -3.25933 | -0.35860 |
| O | -4.53158 | -1.07785 | 0.15590  |
| C | -5.10911 | 0.19386  | 0.43305  |
| H | -4.73724 | 0.60378  | 1.37988  |
| H | -4.90703 | 0.90826  | -0.37415 |
| H | -6.18393 | 0.02425  | 0.50826  |
| C | 1.21363  | 1.14417  | 0.56750  |
| C | 2.06605  | 0.14775  | 1.30782  |
| H | 2.15341  | 0.46506  | 2.35716  |
| H | 1.57462  | -0.82968 | 1.32661  |
| C | 3.49144  | 0.01456  | 0.73242  |
| H | 3.93420  | 1.01678  | 0.69096  |
| H | 4.10708  | -0.55522 | 1.44138  |
| C | 3.56612  | -0.64651 | -0.66148 |
| H | 2.58529  | -0.57884 | -1.15142 |
| H | 4.25433  | -0.07933 | -1.30050 |
| C | 4.04129  | -2.10838 | -0.63993 |
| H | 4.12300  | -2.47129 | -1.67332 |
| H | 5.05879  | -2.13727 | -0.22493 |
| C | 3.15249  | -3.06706 | 0.15809  |
| H | 3.05852  | -2.75490 | 1.20424  |

|   |         |          |          |
|---|---------|----------|----------|
| H | 2.14268 | -3.12193 | -0.26401 |
| H | 3.56744 | -4.08145 | 0.15269  |
| H | 2.43922 | 3.01772  | 0.74561  |

4e\_conformer-239

|   |          |          |          |
|---|----------|----------|----------|
| C | -0.43260 | 3.12902  | -0.13720 |
| C | 0.18940  | 0.96283  | -0.45502 |
| N | 0.62412  | 2.25567  | -0.19365 |
| H | 1.59471  | 2.53500  | -0.18530 |
| C | -1.57700 | 2.37770  | -0.33770 |
| C | -0.24225 | 4.59323  | 0.08867  |
| H | 0.27671  | 4.79738  | 1.03393  |
| H | 0.34607  | 5.05952  | -0.71245 |
| H | -1.21372 | 5.09354  | 0.12384  |
| C | 1.14570  | -0.14072 | -0.53358 |
| C | 0.89497  | -1.27428 | -1.32431 |
| C | 2.35660  | -0.07258 | 0.18800  |
| C | 1.82800  | -2.31020 | -1.38255 |
| H | -0.01472 | -1.33536 | -1.90901 |
| C | 3.29006  | -1.10825 | 0.10933  |
| H | 2.53972  | 0.77650  | 0.83454  |
| C | 3.02497  | -2.23868 | -0.67778 |
| H | 1.62275  | -3.18140 | -1.99846 |
| H | 3.76002  | -3.03585 | -0.71927 |
| O | 4.48210  | -1.11715 | 0.77546  |
| C | 4.80656  | 0.01001  | 1.58249  |
| H | 5.79392  | -0.19426 | 1.99856  |
| H | 4.84388  | 0.93005  | 0.98669  |
| H | 4.08605  | 0.13761  | 2.39947  |
| C | -1.20395 | 1.01732  | -0.54462 |
| C | -2.18162 | -0.11591 | -0.70587 |
| H | -3.18230 | 0.31242  | -0.82199 |
| H | -1.99548 | -0.67859 | -1.63003 |
| C | -2.17389 | -1.10545 | 0.47613  |
| H | -1.16982 | -1.53855 | 0.54562  |
| H | -2.32976 | -0.54724 | 1.40952  |
| C | -3.21721 | -2.23451 | 0.36021  |
| H | -3.39486 | -2.45636 | -0.70243 |
| H | -2.80184 | -3.15343 | 0.79374  |
| C | -4.56015 | -1.95581 | 1.05388  |
| H | -5.19645 | -2.84513 | 0.95027  |
| H | -4.38070 | -1.83322 | 2.13143  |
| C | -5.32278 | -0.73403 | 0.53292  |
| H | -4.77655 | 0.19546  | 0.72664  |
| H | -5.49114 | -0.80315 | -0.54892 |

|   |          |          |          |
|---|----------|----------|----------|
| H | -6.30137 | -0.64736 | 1.01913  |
| H | -2.58961 | 2.76171  | -0.33173 |

4e\_conformer-240

|   |          |          |          |
|---|----------|----------|----------|
| C | -1.26544 | 2.34558  | 0.29492  |
| C | -0.01738 | 0.44334  | 0.30701  |
| N | -0.07847 | 1.77317  | -0.08952 |
| H | 0.60855  | 2.22193  | -0.67807 |
| C | -1.97224 | 1.37360  | 0.97837  |
| C | -1.61129 | 3.75943  | -0.04001 |
| H | -2.57600 | 4.02107  | 0.40290  |
| H | -0.86194 | 4.46537  | 0.34016  |
| H | -1.68661 | 3.91737  | -1.12385 |
| C | 1.18501  | -0.35241 | 0.06718  |
| C | 1.12704  | -1.74602 | -0.09606 |
| C | 2.44230  | 0.28626  | -0.00378 |
| C | 2.29643  | -2.47676 | -0.31473 |
| H | 0.17067  | -2.25223 | -0.08350 |
| C | 3.60259  | -0.45278 | -0.24060 |
| H | 2.50223  | 1.35414  | 0.16513  |
| C | 3.53285  | -1.84603 | -0.39286 |
| H | 2.23808  | -3.55431 | -0.44114 |
| H | 4.44741  | -2.40271 | -0.56963 |
| O | 4.85313  | 0.08921  | -0.32433 |
| C | 4.98185  | 1.50020  | -0.18446 |
| H | 6.04406  | 1.71706  | -0.30451 |
| H | 4.41061  | 2.03146  | -0.95538 |
| H | 4.65098  | 1.83572  | 0.80593  |
| C | -1.20621 | 0.16908  | 0.98561  |
| C | -1.62393 | -1.11245 | 1.65173  |
| H | -0.73852 | -1.65485 | 2.00576  |
| H | -2.20827 | -0.85776 | 2.54595  |
| C | -2.47947 | -2.07792 | 0.79803  |
| H | -1.86783 | -2.51150 | -0.00443 |
| H | -2.76496 | -2.91567 | 1.44716  |
| C | -3.73881 | -1.45002 | 0.17336  |
| H | -4.52731 | -2.21117 | 0.09671  |
| H | -4.13359 | -0.67453 | 0.84497  |
| C | -3.51014 | -0.85012 | -1.22039 |
| H | -2.65654 | -0.16551 | -1.18756 |
| H | -3.23446 | -1.65983 | -1.91106 |
| C | -4.73861 | -0.11084 | -1.75385 |
| H | -4.99105 | 0.73937  | -1.10793 |
| H | -4.56829 | 0.27699  | -2.76486 |
| H | -5.61522 | -0.76997 | -1.79119 |

|   |          |         |         |
|---|----------|---------|---------|
| H | -2.94498 | 1.51074 | 1.43295 |
|---|----------|---------|---------|

4e\_conformer-241

|   |          |          |          |
|---|----------|----------|----------|
| C | 3.10587  | -1.65820 | -0.38292 |
| C | 1.20369  | -0.72788 | 0.43949  |
| N | 1.75687  | -1.83511 | -0.18496 |
| H | 1.25710  | -2.69683 | -0.35327 |
| C | 3.41606  | -0.39759 | 0.09341  |
| C | 3.96459  | -2.72052 | -0.98800 |
| H | 3.60629  | -3.01903 | -1.98149 |
| H | 4.98893  | -2.35385 | -1.09654 |
| H | 3.99716  | -3.62660 | -0.36868 |
| C | -0.23412 | -0.64924 | 0.70879  |
| C | -0.72072 | -0.13891 | 1.92862  |
| C | -1.15363 | -1.07068 | -0.25895 |
| C | -2.09048 | -0.03290 | 2.14082  |
| H | -0.02144 | 0.15424  | 2.70387  |
| C | -2.53231 | -0.96943 | -0.03492 |
| H | -0.81258 | -1.44650 | -1.21849 |
| C | -3.01093 | -0.44087 | 1.16949  |
| H | -2.45987 | 0.36368  | 3.08246  |
| H | -4.07284 | -0.34717 | 1.35993  |
| O | -3.32612 | -1.39315 | -1.06178 |
| C | -4.73615 | -1.26499 | -0.90926 |
| H | -5.10308 | -1.86228 | -0.06592 |
| H | -5.02723 | -0.21759 | -0.76481 |
| H | -5.17254 | -1.63939 | -1.83612 |
| C | 2.22724  | 0.19881  | 0.61655  |
| C | 2.10049  | 1.62430  | 1.07797  |
| H | 1.19847  | 1.75198  | 1.68274  |
| H | 2.94673  | 1.87622  | 1.73055  |
| C | 2.07504  | 2.63110  | -0.09532 |
| H | 2.05977  | 3.65099  | 0.31485  |
| H | 3.01422  | 2.53316  | -0.65553 |
| C | 0.89498  | 2.45057  | -1.05985 |
| H | 1.05516  | 3.08826  | -1.94085 |
| H | 0.88636  | 1.41514  | -1.42525 |
| C | -0.47512 | 2.78001  | -0.45600 |
| H | -0.64228 | 2.17381  | 0.44049  |
| H | -0.48164 | 3.83008  | -0.12926 |
| C | -1.62473 | 2.53588  | -1.43687 |
| H | -1.50888 | 3.14027  | -2.34550 |
| H | -1.65975 | 1.48184  | -1.73582 |
| H | -2.59375 | 2.78523  | -0.98889 |
| H | 4.39788  | 0.05861  | 0.06219  |

## 4e\_conformer-242

|   |          |          |          |
|---|----------|----------|----------|
| C | 3.47872  | -0.94639 | 0.10834  |
| C | 1.22126  | -0.67796 | 0.13697  |
| N | 2.27677  | -1.44964 | -0.32722 |
| H | 2.16170  | -2.33146 | -0.80659 |
| C | 3.19087  | 0.19065  | 0.84040  |
| C | 4.77851  | -1.61363 | -0.20310 |
| H | 4.83708  | -2.62210 | 0.22707  |
| H | 4.93868  | -1.71202 | -1.28438 |
| H | 5.60525  | -1.02737 | 0.20704  |
| C | -0.15660 | -1.00106 | -0.23963 |
| C | -0.45049 | -1.46629 | -1.53176 |
| C | -1.20479 | -0.85825 | 0.68928  |
| C | -1.76717 | -1.76883 | -1.88561 |
| H | 0.34490  | -1.56083 | -2.26452 |
| C | -2.52140 | -1.13844 | 0.31704  |
| H | -0.97002 | -0.54844 | 1.69853  |
| C | -2.80603 | -1.60150 | -0.97673 |
| H | -1.98673 | -2.12426 | -2.88849 |
| H | -3.83526 | -1.82058 | -1.24186 |
| O | -3.59560 | -1.00898 | 1.14948  |
| C | -3.36700 | -0.49492 | 2.45755  |
| H | -2.91741 | 0.50476  | 2.41901  |
| H | -4.34758 | -0.43577 | 2.93149  |
| H | -2.71959 | -1.15995 | 3.04174  |
| C | 1.77389  | 0.37108  | 0.87006  |
| C | 1.08116  | 1.57614  | 1.44606  |
| H | 0.03709  | 1.35366  | 1.68101  |
| H | 1.55830  | 1.84205  | 2.39819  |
| C | 1.14061  | 2.80741  | 0.51274  |
| H | 0.73329  | 3.67686  | 1.04825  |
| H | 2.19488  | 3.03265  | 0.30559  |
| C | 0.39049  | 2.62820  | -0.81363 |
| H | 0.65258  | 3.45516  | -1.48862 |
| H | 0.74003  | 1.70887  | -1.30156 |
| C | -1.13512 | 2.57410  | -0.67167 |
| H | -1.41392 | 1.79746  | 0.04903  |
| H | -1.49221 | 3.52793  | -0.25729 |
| C | -1.84004 | 2.28605  | -1.99929 |
| H | -1.53316 | 1.31021  | -2.39322 |
| H | -2.92967 | 2.26975  | -1.88034 |
| H | -1.59591 | 3.04588  | -2.75251 |
| H | 3.92399  | 0.83856  | 1.30493  |

## 4e\_conformer-243

|   |          |          |          |
|---|----------|----------|----------|
| C | 3.09645  | -1.54051 | -0.34102 |
| C | 0.89209  | -1.21302 | 0.11158  |
| N | 1.81920  | -1.99008 | -0.56964 |
| H | 1.57228  | -2.70296 | -1.24111 |
| C | 2.99246  | -0.47321 | 0.53117  |
| C | 4.28703  | -2.17053 | -0.98690 |
| H | 4.36277  | -3.23950 | -0.75022 |
| H | 4.25593  | -2.08130 | -2.08071 |
| H | 5.20136  | -1.68308 | -0.63801 |
| C | -0.53486 | -1.53108 | 0.03383  |
| C | -0.96325 | -2.86555 | -0.07272 |
| C | -1.50046 | -0.50601 | 0.04108  |
| C | -2.32459 | -3.16062 | -0.16514 |
| H | -0.23540 | -3.67084 | -0.05396 |
| C | -2.86049 | -0.81384 | -0.03459 |
| H | -1.17045 | 0.52128  | 0.06819  |
| C | -3.27853 | -2.14866 | -0.14130 |
| H | -2.64589 | -4.19548 | -0.24412 |
| H | -4.33996 | -2.36490 | -0.20651 |
| O | -3.85487 | 0.12221  | -0.03288 |
| C | -3.48074 | 1.49101  | 0.08354  |
| H | -2.86012 | 1.81065  | -0.76253 |
| H | -4.41268 | 2.05773  | 0.08416  |
| H | -2.93864 | 1.67752  | 1.01869  |
| C | 1.61133  | -0.25531 | 0.82557  |
| C | 1.10084  | 0.77392  | 1.79758  |
| H | 0.03426  | 0.61678  | 1.99354  |
| H | 1.61215  | 0.63567  | 2.76029  |
| C | 1.33360  | 2.22788  | 1.33850  |
| H | 1.09103  | 2.90678  | 2.16740  |
| H | 2.40327  | 2.36545  | 1.12809  |
| C | 0.52118  | 2.62624  | 0.10500  |
| H | 0.69566  | 1.89596  | -0.69722 |
| H | -0.55035 | 2.57326  | 0.34691  |
| C | 0.83804  | 4.03188  | -0.41259 |
| H | 0.68061  | 4.76074  | 0.39481  |
| H | 1.90408  | 4.08876  | -0.67332 |
| C | -0.01070 | 4.41868  | -1.62633 |
| H | -1.07980 | 4.39584  | -1.38069 |
| H | 0.22971  | 5.42684  | -1.98243 |
| H | 0.15209  | 3.72141  | -2.45738 |
| H | 3.82623  | 0.08872  | 0.93321  |

## 4e\_conformer-244

|   |          |          |          |
|---|----------|----------|----------|
| C | -3.09713 | -1.53918 | -0.34106 |
| C | -0.89265 | -1.21268 | 0.11165  |
| N | -1.82008 | -1.98936 | -0.56958 |
| H | -1.57346 | -2.70241 | -1.24098 |
| C | -2.99270 | -0.47190 | 0.53111  |
| C | -4.28797 | -2.16859 | -0.98705 |
| H | -4.36426 | -3.23753 | -0.75043 |
| H | -5.20209 | -1.68070 | -0.63820 |
| H | -4.25676 | -2.07932 | -2.08086 |
| C | 0.53417  | -1.53133 | 0.03394  |
| C | 0.96204  | -2.86598 | -0.07260 |
| C | 1.50017  | -0.50664 | 0.04112  |
| C | 2.32326  | -3.16156 | -0.16512 |
| H | 0.23389  | -3.67100 | -0.05377 |
| C | 2.86007  | -0.81499 | -0.03462 |
| H | 1.17054  | 0.52078  | 0.06818  |
| C | 3.27759  | -2.14997 | -0.14136 |
| H | 2.64416  | -4.19655 | -0.24410 |
| H | 4.33894  | -2.36662 | -0.20666 |
| O | 3.85482  | 0.12068  | -0.03298 |
| C | 3.48125  | 1.48961  | 0.08366  |
| H | 4.41342  | 2.05594  | 0.08434  |
| H | 2.86072  | 1.80964  | -0.76232 |
| H | 2.93927  | 1.67619  | 1.01887  |
| C | -1.61149 | -0.25463 | 0.82558  |
| C | -1.10063 | 0.77438  | 1.79762  |
| H | -1.61210 | 0.63640  | 2.76027  |
| H | -0.03414 | 0.61675  | 1.99369  |
| C | -1.33267 | 2.22844  | 1.33846  |
| H | -2.40227 | 2.36650  | 1.12798  |
| H | -1.08982 | 2.90726  | 2.16734  |
| C | -0.52000 | 2.62635  | 0.10498  |
| H | 0.55149  | 2.57282  | 0.34695  |
| H | -0.69482 | 1.89614  | -0.69723 |
| C | -0.83611 | 4.03214  | -0.41266 |
| H | -1.90209 | 4.08955  | -0.67349 |
| H | -0.67839 | 4.76093  | 0.39475  |
| C | 0.01296  | 4.41849  | -1.62632 |
| H | -0.15009 | 3.72128  | -2.45737 |
| H | -0.22692 | 5.42676  | -1.98247 |
| H | 1.08202  | 4.39512  | -1.38056 |
| H | -3.82625 | 0.09043  | 0.93307  |

4e\_conformer-245



|   |          |          |          |
|---|----------|----------|----------|
| C | 3.62111  | -0.96587 | -0.09602 |
| C | 1.37221  | -0.64211 | -0.20015 |
| N | 2.39065  | -1.47823 | 0.23550  |
| H | 2.23720  | -2.39779 | 0.62448  |
| C | 3.38955  | 0.24058  | -0.73028 |
| C | 4.89140  | -1.69041 | 0.20920  |
| H | 5.74808  | -1.08696 | -0.10286 |
| H | 4.99686  | -1.89637 | 1.28201  |
| H | 4.95181  | -2.65373 | -0.31412 |
| C | -0.02561 | -0.96989 | 0.08879  |
| C | -0.37429 | -1.58930 | 1.30783  |
| C | -1.04290 | -0.68370 | -0.82826 |
| C | -1.70286 | -1.89203 | 1.58350  |
| H | 0.39482  | -1.80082 | 2.04418  |
| C | -2.38176 | -0.96283 | -0.53100 |
| H | -0.81279 | -0.24768 | -1.79331 |
| C | -2.72227 | -1.57881 | 0.67895  |
| H | -1.96156 | -2.36581 | 2.52641  |
| H | -3.75142 | -1.81064 | 0.92335  |
| O | -3.28104 | -0.60584 | -1.49494 |
| C | -4.66023 | -0.85240 | -1.24153 |
| H | -5.00423 | -0.31203 | -0.35138 |
| H | -5.19579 | -0.48659 | -2.11851 |
| H | -4.85823 | -1.92345 | -1.11354 |
| C | 1.97964  | 0.45745  | -0.80637 |
| C | 1.34728  | 1.72505  | -1.31548 |
| H | 1.94269  | 2.09758  | -2.15872 |
| H | 0.34613  | 1.53759  | -1.71229 |
| C | 1.27038  | 2.83972  | -0.24662 |
| H | 2.27930  | 3.00080  | 0.15476  |
| H | 0.97361  | 3.77859  | -0.73563 |
| C | 0.30295  | 2.53995  | 0.90602  |
| H | 0.52612  | 1.54542  | 1.31310  |
| H | 0.48177  | 3.25398  | 1.72225  |
| C | -1.17778 | 2.60514  | 0.51291  |
| H | -1.42605 | 3.63431  | 0.21627  |
| H | -1.35760 | 1.97668  | -0.36654 |
| C | -2.10663 | 2.14666  | 1.63912  |
| H | -1.90561 | 1.10201  | 1.90128  |
| H | -1.96702 | 2.75527  | 2.54169  |
| H | -3.16044 | 2.21983  | 1.34558  |
| H | 4.15523  | 0.91090  | -1.10107 |

4e\_conformer-246

|   |          |          |          |
|---|----------|----------|----------|
| C | -3.62051 | -0.96632 | -0.09660 |
|---|----------|----------|----------|

|   |          |          |          |
|---|----------|----------|----------|
| C | -1.37172 | -0.64199 | -0.20089 |
| N | -2.38990 | -1.47858 | 0.23438  |
| H | -2.23610 | -2.39818 | 0.62312  |
| C | -3.38932 | 0.24054  | -0.73025 |
| C | -4.89063 | -1.69127 | 0.20837  |
| H | -5.74742 | -1.08763 | -0.10300 |
| H | -4.95111 | -2.65419 | -0.31568 |
| H | -4.99580 | -1.89808 | 1.28106  |
| C | 0.02618  | -0.96960 | 0.08785  |
| C | 0.37493  | -1.59092 | 1.30591  |
| C | 1.04358  | -0.68148 | -0.82847 |
| C | 1.70355  | -1.89363 | 1.58132  |
| H | -0.39417 | -1.80397 | 2.04183  |
| C | 2.38249  | -0.96049 | -0.53137 |
| H | 0.81356  | -0.24401 | -1.79288 |
| C | 2.72302  | -1.57847 | 0.67754  |
| H | 1.96223  | -2.36892 | 2.52348  |
| H | 3.75223  | -1.81029 | 0.92173  |
| O | 3.28179  | -0.60142 | -1.49453 |
| C | 4.66095  | -0.84864 | -1.24164 |
| H | 4.85878  | -1.91995 | -1.11553 |
| H | 5.19652  | -0.48139 | -2.11800 |
| H | 5.00510  | -0.30991 | -0.35055 |
| C | -1.97952 | 0.45779  | -0.80645 |
| C | -1.34764 | 1.72587  | -1.31496 |
| H | -0.34636 | 1.53900  | -1.71172 |
| H | -1.94307 | 2.09856  | -2.15811 |
| C | -1.27111 | 2.84000  | -0.24550 |
| H | -0.97345 | 3.77900  | -0.73372 |
| H | -2.28028 | 3.00130  | 0.15517  |
| C | -0.30481 | 2.53871  | 0.90765  |
| H | -0.48432 | 3.25143  | 1.72486  |
| H | -0.52859 | 1.54357  | 1.31289  |
| C | 1.17635  | 2.60422  | 0.51608  |
| H | 1.35646  | 1.97914  | -0.36571 |
| H | 1.42579  | 3.63435  | 0.22375  |
| C | 2.10371  | 2.14022  | 1.64125  |
| H | 1.90130  | 1.09474  | 1.89891  |
| H | 3.15787  | 2.21349  | 1.34899  |
| H | 1.96389  | 2.74531  | 2.54616  |
| H | -4.15524 | 0.91087  | -1.10052 |

4e\_conformer-247

|   |         |          |          |
|---|---------|----------|----------|
| C | 2.79628 | -1.98791 | -0.66082 |
| C | 1.01505 | -1.01442 | 0.36320  |

|   |          |          |          |
|---|----------|----------|----------|
| N | 1.43247  | -2.01857 | -0.49807 |
| H | 0.82747  | -2.74728 | -0.84947 |
| C | 3.26071  | -0.92119 | 0.08662  |
| C | 3.51871  | -2.99301 | -1.49720 |
| H | 3.40541  | -4.01245 | -1.10551 |
| H | 3.15479  | -3.00067 | -2.53258 |
| H | 4.58686  | -2.76051 | -1.51839 |
| C | -0.40864 | -0.81993 | 0.64720  |
| C | -0.85927 | -0.45162 | 1.93060  |
| C | -1.35670 | -1.00341 | -0.36815 |
| C | -2.21569 | -0.25691 | 2.16326  |
| H | -0.14758 | -0.34736 | 2.74138  |
| C | -2.72321 | -0.82048 | -0.12257 |
| H | -1.04622 | -1.26101 | -1.37596 |
| C | -3.16286 | -0.43644 | 1.14948  |
| H | -2.55465 | 0.02639  | 3.15591  |
| H | -4.21399 | -0.28188 | 1.35922  |
| O | -3.54473 | -1.02603 | -1.19385 |
| C | -4.94267 | -0.82896 | -1.00762 |
| H | -5.16405 | 0.20308  | -0.70999 |
| H | -5.40525 | -1.03586 | -1.97351 |
| H | -5.34619 | -1.51678 | -0.25482 |
| C | 2.15185  | -0.30077 | 0.73901  |
| C | 2.23281  | 0.97600  | 1.53138  |
| H | 1.42526  | 1.03349  | 2.26786  |
| H | 3.17117  | 0.98033  | 2.10064  |
| C | 2.18194  | 2.24457  | 0.65342  |
| H | 2.37973  | 3.11989  | 1.28828  |
| H | 2.99478  | 2.20306  | -0.08510 |
| C | 0.84568  | 2.43415  | -0.06840 |
| H | 0.64755  | 1.56026  | -0.70176 |
| H | 0.03411  | 2.45778  | 0.67337  |
| C | 0.78847  | 3.70199  | -0.92464 |
| H | 0.97997  | 4.58028  | -0.29194 |
| H | 1.60078  | 3.67601  | -1.66486 |
| C | -0.55356 | 3.86921  | -1.64217 |
| H | -1.37889 | 3.92877  | -0.92188 |
| H | -0.57531 | 4.77908  | -2.25286 |
| H | -0.75389 | 3.01644  | -2.30259 |
| H | 4.29523  | -0.60818 | 0.15639  |

4e\_conformer-248

|   |          |          |          |
|---|----------|----------|----------|
| C | -2.95144 | -1.68350 | -0.24084 |
| C | -1.09500 | -0.64308 | 0.55522  |
| N | -1.60857 | -1.81625 | 0.02275  |

|   |          |          |          |
|---|----------|----------|----------|
| H | -1.09363 | -2.68363 | -0.03420 |
| C | -3.29702 | -0.38775 | 0.09594  |
| C | -3.77156 | -2.81535 | -0.76822 |
| H | -3.37150 | -3.20445 | -1.71324 |
| H | -3.81519 | -3.65606 | -0.06331 |
| H | -4.79599 | -2.47930 | -0.95012 |
| C | 0.33012  | -0.51585 | 0.86936  |
| C | 0.76309  | 0.12130  | 2.04175  |
| C | 1.28769  | -1.03020 | -0.02636 |
| C | 2.12870  | 0.26612  | 2.29428  |
| H | 0.03287  | 0.48468  | 2.75632  |
| C | 2.65168  | -0.89034 | 0.24170  |
| H | 0.94797  | -1.49810 | -0.94205 |
| C | 3.07583  | -0.23222 | 1.40581  |
| H | 2.45851  | 0.76412  | 3.20174  |
| H | 4.13995  | -0.12733 | 1.59115  |
| O | 3.64446  | -1.34430 | -0.57776 |
| C | 3.26674  | -1.99484 | -1.78680 |
| H | 2.67229  | -2.89460 | -1.58761 |
| H | 2.69733  | -1.32270 | -2.44023 |
| H | 4.19860  | -2.27629 | -2.27877 |
| C | -2.13773 | 0.27816  | 0.60118  |
| C | -2.05045 | 1.74415  | 0.92366  |
| H | -2.91791 | 2.04054  | 1.52795  |
| H | -1.16708 | 1.94910  | 1.53449  |
| C | -2.01346 | 2.63149  | -0.34193 |
| H | -2.93819 | 2.46418  | -0.90970 |
| H | -2.02166 | 3.68673  | -0.03370 |
| C | -0.80976 | 2.37584  | -1.25872 |
| H | -0.78331 | 1.31100  | -1.52570 |
| H | -0.95520 | 2.92702  | -2.19867 |
| C | 0.54294  | 2.77473  | -0.65769 |
| H | 0.53236  | 3.85007  | -0.42764 |
| H | 0.69559  | 2.25401  | 0.29348  |
| C | 1.71600  | 2.45574  | -1.58777 |
| H | 1.76378  | 1.37949  | -1.79127 |
| H | 1.61628  | 2.97575  | -2.54894 |
| H | 2.67322  | 2.75161  | -1.14303 |
| H | -4.28293 | 0.04600  | -0.01741 |

4e\_conformer-249

|   |          |          |          |
|---|----------|----------|----------|
| C | -2.88342 | -2.37834 | -0.22246 |
| C | -1.68706 | -0.46749 | 0.07366  |
| N | -2.90350 | -1.00884 | -0.31809 |
| H | -3.65733 | -0.47450 | -0.72555 |

|   |          |          |          |
|---|----------|----------|----------|
| C | -1.63701 | -2.72553 | 0.26744  |
| C | -4.05416 | -3.21884 | -0.61542 |
| H | -4.95432 | -2.95956 | -0.04360 |
| H | -4.30138 | -3.10671 | -1.67918 |
| H | -3.83248 | -4.27383 | -0.43341 |
| C | -1.47440 | 0.97829  | 0.08566  |
| C | -2.54727 | 1.86557  | 0.28366  |
| C | -0.18444 | 1.51118  | -0.11013 |
| C | -2.32831 | 3.24401  | 0.28487  |
| H | -3.54519 | 1.47999  | 0.46812  |
| C | 0.02637  | 2.89074  | -0.08566 |
| H | 0.63616  | 0.84021  | -0.31303 |
| C | -1.05143 | 3.76733  | 0.10759  |
| H | -3.16479 | 3.91956  | 0.44095  |
| H | -0.86765 | 4.83677  | 0.11514  |
| O | 1.24845  | 3.47567  | -0.25887 |
| C | 2.37742  | 2.62380  | -0.42667 |
| H | 2.50984  | 1.96243  | 0.43834  |
| H | 2.28985  | 2.01512  | -1.33482 |
| H | 3.24066  | 3.28456  | -0.51520 |
| C | -0.87462 | -1.53545 | 0.45871  |
| C | 0.52499  | -1.47503 | 1.00167  |
| H | 0.69380  | -0.50993 | 1.49512  |
| H | 0.64660  | -2.24218 | 1.77798  |
| C | 1.61367  | -1.68863 | -0.06689 |
| H | 1.50459  | -2.69469 | -0.49430 |
| H | 1.45097  | -0.99125 | -0.90043 |
| C | 3.03087  | -1.50404 | 0.47953  |
| H | 3.11659  | -0.50297 | 0.92852  |
| H | 3.20494  | -2.21923 | 1.29676  |
| C | 4.11888  | -1.67070 | -0.58520 |
| H | 4.03765  | -2.67116 | -1.03259 |
| H | 3.93623  | -0.95548 | -1.39966 |
| C | 5.53177  | -1.46756 | -0.03273 |
| H | 5.75075  | -2.18980 | 0.76329  |
| H | 6.29045  | -1.58993 | -0.81403 |
| H | 5.64668  | -0.46249 | 0.39158  |
| H | -1.30671 | -3.73433 | 0.48177  |

#### 4e\_conformer-250

|   |          |          |          |
|---|----------|----------|----------|
| C | -3.31908 | -1.28801 | -0.06882 |
| C | -1.07690 | -0.91887 | 0.02163  |
| N | -2.10319 | -1.58150 | -0.63618 |
| H | -1.95587 | -2.28174 | -1.34921 |
| C | -3.07203 | -0.39332 | 0.95614  |

|   |          |          |          |
|---|----------|----------|----------|
| C | -4.59030 | -1.90705 | -0.55073 |
| H | -4.76870 | -1.69986 | -1.61364 |
| H | -4.58911 | -2.99813 | -0.42820 |
| H | -5.43631 | -1.50855 | 0.01573  |
| C | 0.30494  | -1.04113 | -0.44770 |
| C | 0.58294  | -1.13561 | -1.82124 |
| C | 1.37462  | -1.06699 | 0.46749  |
| C | 1.90281  | -1.24190 | -2.26453 |
| H | -0.22869 | -1.09146 | -2.54078 |
| C | 2.69204  | -1.15110 | 0.01242  |
| H | 1.15832  | -1.04530 | 1.52653  |
| C | 2.96041  | -1.24290 | -1.36208 |
| H | 2.10884  | -1.30908 | -3.32915 |
| H | 3.99152  | -1.31356 | -1.69290 |
| O | 3.78458  | -1.16898 | 0.83118  |
| C | 3.57011  | -1.03585 | 2.23247  |
| H | 4.56104  | -1.03586 | 2.68830  |
| H | 3.05768  | -0.09535 | 2.46911  |
| H | 2.98638  | -1.87498 | 2.62979  |
| C | -1.66600 | -0.15353 | 1.02794  |
| C | -1.02614 | 0.86489  | 1.93338  |
| H | -1.57730 | 0.88433  | 2.88218  |
| H | 0.00219  | 0.58522  | 2.18253  |
| C | -1.01243 | 2.29088  | 1.34286  |
| H | -2.04156 | 2.58572  | 1.09430  |
| H | -0.66541 | 2.98846  | 2.11832  |
| C | -0.12688 | 2.43248  | 0.10271  |
| H | 0.89824  | 2.12255  | 0.35264  |
| H | -0.47051 | 1.73484  | -0.67131 |
| C | -0.10328 | 3.85181  | -0.47068 |
| H | -1.12893 | 4.15839  | -0.72068 |
| H | 0.24531  | 4.55281  | 0.30098  |
| C | 0.78463  | 3.97205  | -1.71201 |
| H | 0.43935  | 3.30011  | -2.50747 |
| H | 0.78546  | 4.99267  | -2.11153 |
| H | 1.82222  | 3.70173  | -1.48001 |
| H | -3.82532 | 0.05433  | 1.59271  |

#### 4e\_conformer-251

|   |         |          |          |
|---|---------|----------|----------|
| C | 3.31857 | -1.28898 | -0.06881 |
| C | 1.07649 | -0.91921 | 0.02161  |
| N | 2.10261 | -1.58209 | -0.63621 |
| H | 1.95511 | -2.28224 | -1.34930 |
| C | 3.07174 | -0.39427 | 0.95620  |
| C | 4.58962 | -1.90836 | -0.55071 |

|   |          |          |          |
|---|----------|----------|----------|
| H | 4.58812  | -2.99944 | -0.42823 |
| H | 4.76810  | -1.70117 | -1.61360 |
| H | 5.43573  | -1.51011 | 0.01579  |
| C | -0.30537 | -1.04104 | -0.44776 |
| C | -0.58336 | -1.13535 | -1.82132 |
| C | -1.37508 | -1.06670 | 0.46740  |
| C | -1.90325 | -1.24128 | -2.26464 |
| H | 0.22829  | -1.09135 | -2.54084 |
| C | -2.69251 | -1.15045 | 0.01229  |
| H | -1.15880 | -1.04513 | 1.52644  |
| C | -2.96087 | -1.24209 | -1.36222 |
| H | -2.10927 | -1.30832 | -3.32927 |
| H | -3.99199 | -1.31247 | -1.69307 |
| O | -3.78508 | -1.16812 | 0.83103  |
| C | -3.57061 | -1.03517 | 2.23234  |
| H | -3.05796 | -0.09482 | 2.46908  |
| H | -4.56154 | -1.03501 | 2.68814  |
| H | -2.98707 | -1.87447 | 2.62958  |
| C | 1.66579  | -0.15409 | 1.02798  |
| C | 1.02617  | 0.86446  | 1.93345  |
| H | -0.00231 | 0.58515  | 2.18238  |
| H | 1.57718  | 0.88356  | 2.88235  |
| C | 1.01313  | 2.29053  | 1.34312  |
| H | 0.66618  | 2.98813  | 2.11859  |
| H | 2.04242  | 2.58502  | 1.09483  |
| C | 0.12792  | 2.43262  | 0.10278  |
| H | 0.47149  | 1.73497  | -0.67126 |
| H | -0.89737 | 2.12302  | 0.35241  |
| C | 0.10496  | 3.85204  | -0.47040 |
| H | -0.24358 | 4.55305  | 0.30128  |
| H | 1.13077  | 4.15830  | -0.72011 |
| C | -0.78260 | 3.97279  | -1.71193 |
| H | -1.82034 | 3.70278  | -1.48024 |
| H | -0.78299 | 4.99347  | -2.11128 |
| H | -0.43736 | 3.30087  | -2.50742 |
| H | 3.82515  | 0.05312  | 1.59282  |

4e\_conformer-252

|   |          |          |          |
|---|----------|----------|----------|
| C | 1.77964  | -2.73889 | -0.47174 |
| C | 0.36707  | -1.19147 | 0.41552  |
| N | 0.48760  | -2.27884 | -0.43909 |
| H | -0.29584 | -2.74257 | -0.87662 |
| C | 2.51404  | -1.91174 | 0.35965  |
| C | 2.18108  | -3.92727 | -1.28272 |
| H | 1.66756  | -4.84085 | -0.95560 |

|   |          |          |          |
|---|----------|----------|----------|
| H | 1.95463  | -3.79097 | -2.34792 |
| H | 3.25696  | -4.09654 | -1.18690 |
| C | -0.92034 | -0.51875 | 0.58313  |
| C | -1.25693 | 0.13530  | 1.78680  |
| C | -1.86142 | -0.52159 | -0.45696 |
| C | -2.48915 | 0.76327  | 1.91983  |
| H | -0.56093 | 0.12990  | 2.61687  |
| C | -3.10666 | 0.10104  | -0.30988 |
| H | -1.63444 | -0.98042 | -1.41418 |
| C | -3.42956 | 0.75565  | 0.88419  |
| H | -2.73734 | 1.26246  | 2.85245  |
| H | -4.38390 | 1.24989  | 1.01655  |
| O | -3.93097 | 0.02643  | -1.39640 |
| C | -5.20235 | 0.66209  | -1.31170 |
| H | -5.81298 | 0.22901  | -0.51031 |
| H | -5.09892 | 1.74099  | -1.14449 |
| H | -5.68831 | 0.48821  | -2.27263 |
| C | 1.64157  | -0.93849 | 0.92855  |
| C | 2.08933  | 0.19397  | 1.81617  |
| H | 1.57643  | 0.16428  | 2.78599  |
| H | 3.15413  | 0.04830  | 2.03944  |
| C | 1.90121  | 1.59184  | 1.19552  |
| H | 0.83286  | 1.76774  | 1.01823  |
| H | 2.22407  | 2.34747  | 1.92527  |
| C | 2.66982  | 1.78626  | -0.11317 |
| H | 3.74291  | 1.61971  | 0.06512  |
| H | 2.35744  | 1.01786  | -0.83271 |
| C | 2.46644  | 3.17240  | -0.73149 |
| H | 1.39307  | 3.33490  | -0.90406 |
| H | 2.77970  | 3.94198  | -0.01183 |
| C | 3.22979  | 3.35805  | -2.04525 |
| H | 2.91150  | 2.61998  | -2.79185 |
| H | 3.06612  | 4.35539  | -2.46929 |
| H | 4.30897  | 3.23113  | -1.89450 |
| H | 3.57928  | -1.98746 | 0.53911  |

#### 4e\_conformer-253

|   |         |          |          |
|---|---------|----------|----------|
| C | 3.29380 | -1.66546 | -0.29805 |
| C | 1.68636 | -0.09939 | 0.06645  |
| N | 2.96948 | -0.33569 | -0.40660 |
| H | 3.53758 | 0.35595  | -0.87430 |
| C | 2.20762 | -2.29455 | 0.28353  |
| C | 4.60587 | -2.20279 | -0.76819 |
| H | 5.45128 | -1.71277 | -0.26854 |
| H | 4.66616 | -3.27404 | -0.55822 |



|   |          |          |          |
|---|----------|----------|----------|
| H | 4.74264  | -2.06475 | -1.84875 |
| C | 1.12586  | 1.25038  | 0.08046  |
| C | 1.95695  | 2.37637  | 0.21669  |
| C | -0.26327 | 1.44666  | -0.05227 |
| C | 1.40672  | 3.65911  | 0.22046  |
| H | 3.02675  | 2.24941  | 0.35111  |
| C | -0.80453 | 2.73320  | -0.02802 |
| H | -0.90214 | 0.59027  | -0.20645 |
| C | 0.03349  | 3.85017  | 0.10492  |
| H | 2.05806  | 4.52189  | 0.32894  |
| H | -0.40647 | 4.84209  | 0.11370  |
| O | -2.13911 | 2.99878  | -0.14519 |
| C | -3.02811 | 1.89394  | -0.27565 |
| H | -2.82428 | 1.32079  | -1.18791 |
| H | -2.96290 | 1.22448  | 0.59070  |
| H | -4.03058 | 2.32015  | -0.33148 |
| C | 1.18993  | -1.32289 | 0.51855  |
| C | -0.14011 | -1.59351 | 1.16297  |
| H | -0.01192 | -2.33836 | 1.95987  |
| H | -0.51300 | -0.68377 | 1.64972  |
| C | -1.20961 | -2.10950 | 0.18236  |
| H | -1.29988 | -1.40479 | -0.65363 |
| H | -0.86683 | -3.05532 | -0.25941 |
| C | -2.57248 | -2.31558 | 0.84971  |
| H | -2.46001 | -3.04438 | 1.66440  |
| H | -2.88831 | -1.37409 | 1.32415  |
| C | -3.67675 | -2.79055 | -0.10569 |
| H | -3.34504 | -3.70662 | -0.61446 |
| H | -4.55997 | -3.07001 | 0.48357  |
| C | -4.08642 | -1.74452 | -1.14791 |
| H | -4.89633 | -2.11663 | -1.78540 |
| H | -4.44065 | -0.82764 | -0.66018 |
| H | -3.25108 | -1.47122 | -1.80194 |
| H | 2.15152  | -3.34745 | 0.53051  |

#### 4e\_conformer-254

|   |          |          |          |
|---|----------|----------|----------|
| C | -3.29347 | -1.66605 | -0.29792 |
| C | -1.68630 | -0.09965 | 0.06645  |
| N | -2.96940 | -0.33623 | -0.40654 |
| H | -3.53765 | 0.35529  | -0.87425 |
| C | -2.20714 | -2.29491 | 0.28365  |
| C | -4.60545 | -2.20365 | -0.76799 |
| H | -5.45093 | -1.71377 | -0.26833 |
| H | -4.74228 | -2.06568 | -1.84855 |
| H | -4.66553 | -3.27491 | -0.55797 |

|   |          |          |          |
|---|----------|----------|----------|
| C | -1.12609 | 1.25022  | 0.08039  |
| C | -1.95744 | 2.37606  | 0.21638  |
| C | 0.26302  | 1.44680  | -0.05219 |
| C | -1.40749 | 3.65891  | 0.22006  |
| H | -3.02723 | 2.24887  | 0.35068  |
| C | 0.80398  | 2.73347  | -0.02800 |
| H | 0.90211  | 0.59055  | -0.20619 |
| C | -0.03430 | 3.85027  | 0.10469  |
| H | -2.05905 | 4.52156  | 0.32836  |
| H | 0.40545  | 4.84229  | 0.11341  |
| O | 2.13853  | 2.99933  | -0.14501 |
| C | 3.02781  | 1.89467  | -0.27507 |
| H | 4.03019  | 2.32110  | -0.33081 |
| H | 2.96259  | 1.22537  | 0.59141  |
| H | 2.82428  | 1.32129  | -1.18724 |
| C | -1.18962 | -1.32305 | 0.51859  |
| C | 0.14048  | -1.59343 | 1.16296  |
| H | 0.51326  | -0.68362 | 1.64966  |
| H | 0.01245  | -2.33827 | 1.95989  |
| C | 1.21002  | -2.10930 | 0.18232  |
| H | 0.86738  | -3.05521 | -0.25936 |
| H | 1.30014  | -1.40464 | -0.65373 |
| C | 2.57296  | -2.31510 | 0.84962  |
| H | 2.88872  | -1.37348 | 1.32385  |
| H | 2.46062  | -3.04375 | 1.66446  |
| C | 3.67722  | -2.79015 | -0.10575 |
| H | 4.56053  | -3.06934 | 0.48351  |
| H | 3.34560  | -3.70640 | -0.61426 |
| C | 4.08666  | -1.74433 | -1.14827 |
| H | 4.44076  | -0.82727 | -0.66080 |
| H | 4.89659  | -2.11648 | -1.78571 |
| H | 3.25124  | -1.47134 | -1.80232 |
| H | -2.15084 | -3.34779 | 0.53067  |

#### 4e\_conformer-255

|   |          |          |          |
|---|----------|----------|----------|
| C | -3.26324 | -1.57775 | 0.13034  |
| C | -1.07400 | -1.00382 | -0.08796 |
| N | -1.99282 | -1.76735 | 0.61763  |
| H | -1.73854 | -2.46281 | 1.30482  |
| C | -3.16218 | -0.64868 | -0.88882 |
| C | -4.44125 | -2.31798 | 0.67446  |
| H | -4.35245 | -3.40184 | 0.52318  |
| H | -4.56804 | -2.14971 | 1.75155  |
| H | -5.35385 | -1.98492 | 0.17278  |
| C | 0.34000  | -1.00258 | 0.29404  |

|   |          |          |          |
|---|----------|----------|----------|
| C | 0.70877  | -1.06345 | 1.65420  |
| C | 1.35208  | -0.94145 | -0.67103 |
| C | 2.05126  | -1.04974 | 2.01524  |
| H | -0.06024 | -1.08849 | 2.42003  |
| C | 2.70152  | -0.91012 | -0.29940 |
| H | 1.11077  | -0.93778 | -1.72762 |
| C | 3.06192  | -0.96649 | 1.05253  |
| H | 2.32585  | -1.09015 | 3.06570  |
| H | 4.10014  | -0.94875 | 1.36000  |
| O | 3.59226  | -0.84120 | -1.33237 |
| C | 4.98018  | -0.82527 | -1.01485 |
| H | 5.27901  | -1.73715 | -0.48388 |
| H | 5.50490  | -0.77238 | -1.96964 |
| H | 5.24067  | 0.04917  | -0.40644 |
| C | -1.79055 | -0.28026 | -1.03982 |
| C | -1.29631 | 0.80825  | -1.95406 |
| H | -0.25516 | 0.63688  | -2.24449 |
| H | -1.88298 | 0.78358  | -2.88128 |
| C | -1.40494 | 2.21983  | -1.33897 |
| H | -1.15672 | 2.96052  | -2.11234 |
| H | -2.44896 | 2.40593  | -1.05048 |
| C | -0.49520 | 2.43005  | -0.12628 |
| H | -0.73991 | 1.68834  | 0.64448  |
| H | 0.54651  | 2.22966  | -0.41628 |
| C | -0.59424 | 3.83469  | 0.47465  |
| H | -0.34458 | 4.58021  | -0.29361 |
| H | -1.63620 | 4.03195  | 0.76425  |
| C | 0.31946  | 4.02305  | 1.68850  |
| H | 1.37023  | 3.86212  | 1.41742  |
| H | 0.23221  | 5.03187  | 2.10796  |
| H | 0.07057  | 3.30687  | 2.48137  |
| H | -3.99124 | -0.26182 | -1.46854 |

4e\_conformer-256

|   |          |          |          |
|---|----------|----------|----------|
| C | 3.26321  | -1.57778 | 0.13034  |
| C | 1.07398  | -1.00383 | -0.08796 |
| N | 1.99279  | -1.76735 | 0.61764  |
| H | 1.73851  | -2.46281 | 1.30483  |
| C | 3.16216  | -0.64872 | -0.88883 |
| C | 4.44122  | -2.31801 | 0.67447  |
| H | 4.56803  | -2.14970 | 1.75155  |
| H | 4.35239  | -3.40187 | 0.52324  |
| H | 5.35382  | -1.98500 | 0.17276  |
| C | -0.34002 | -1.00256 | 0.29405  |
| C | -0.70878 | -1.06341 | 1.65421  |

|   |          |          |          |
|---|----------|----------|----------|
| C | -1.35210 | -0.94145 | -0.67102 |
| C | -2.05128 | -1.04967 | 2.01525  |
| H | 0.06023  | -1.08844 | 2.42004  |
| C | -2.70154 | -0.91009 | -0.29939 |
| H | -1.11078 | -0.93780 | -1.72762 |
| C | -3.06194 | -0.96643 | 1.05254  |
| H | -2.32587 | -1.09006 | 3.06571  |
| H | -4.10016 | -0.94868 | 1.36001  |
| O | -3.59228 | -0.84119 | -1.33237 |
| C | -4.98019 | -0.82525 | -1.01484 |
| H | -5.24068 | 0.04920  | -0.40645 |
| H | -5.50491 | -0.77236 | -1.96963 |
| H | -5.27903 | -1.73711 | -0.48386 |
| C | 1.79054  | -0.28029 | -1.03983 |
| C | 1.29631  | 0.80822  | -1.95407 |
| H | 1.88297  | 0.78354  | -2.88130 |
| H | 0.25515  | 0.63686  | -2.24450 |
| C | 1.40496  | 2.21980  | -1.33900 |
| H | 2.44899  | 2.40591  | -1.05054 |
| H | 1.15672  | 2.96049  | -2.11237 |
| C | 0.49525  | 2.43004  | -0.12629 |
| H | -0.54646 | 2.22963  | -0.41626 |
| H | 0.73999  | 1.68833  | 0.64447  |
| C | 0.59430  | 3.83468  | 0.47463  |
| H | 1.63627  | 4.03194  | 0.76421  |
| H | 0.34462  | 4.58020  | -0.29363 |
| C | -0.31937 | 4.02305  | 1.68849  |
| H | -1.37015 | 3.86210  | 1.41744  |
| H | -0.07046 | 3.30687  | 2.48136  |
| H | -0.23212 | 5.03187  | 2.10794  |
| H | 3.99123  | -0.26188 | -1.46856 |

#### 4e\_conformer-257

|   |          |          |          |
|---|----------|----------|----------|
| C | 3.79624  | -0.02762 | 0.28714  |
| C | 1.56389  | -0.42510 | 0.12104  |
| N | 2.83517  | -0.97005 | 0.01618  |
| H | 3.01780  | -1.95498 | -0.11493 |
| C | 3.12813  | 1.15763  | 0.54130  |
| C | 5.25341  | -0.35669 | 0.29210  |
| H | 5.83769  | 0.54587  | 0.49071  |
| H | 5.50602  | -1.09568 | 1.06385  |
| H | 5.58350  | -0.76692 | -0.67083 |
| C | 0.37558  | -1.22958 | -0.16441 |
| C | 0.40363  | -2.22919 | -1.15148 |
| C | -0.81748 | -1.01500 | 0.55305  |

|   |          |          |          |
|---|----------|----------|----------|
| C | -0.74045 | -2.98397 | -1.41769 |
| H | 1.30637  | -2.39178 | -1.73209 |
| C | -1.95992 | -1.76511 | 0.26832  |
| H | -0.82918 | -0.27538 | 1.34093  |
| C | -1.92372 | -2.75769 | -0.72299 |
| H | -0.71130 | -3.75071 | -2.18688 |
| H | -2.82180 | -3.33218 | -0.92538 |
| O | -3.15461 | -1.61285 | 0.91184  |
| C | -3.22274 | -0.67656 | 1.98299  |
| H | -3.01355 | 0.34229  | 1.63900  |
| H | -4.24496 | -0.72843 | 2.35997  |
| H | -2.52272 | -0.93907 | 2.78532  |
| C | 1.72490  | 0.92269  | 0.44504  |
| C | 0.65860  | 1.98265  | 0.52308  |
| H | -0.13585 | 1.69576  | 1.22030  |
| H | 1.10049  | 2.89846  | 0.93634  |
| C | 0.04367  | 2.30547  | -0.85275 |
| H | 0.84449  | 2.67601  | -1.50562 |
| H | -0.31452 | 1.37579  | -1.30994 |
| C | -1.09016 | 3.33938  | -0.80134 |
| H | -0.73281 | 4.23301  | -0.27017 |
| H | -1.32195 | 3.66379  | -1.82564 |
| C | -2.39011 | 2.84806  | -0.14333 |
| H | -2.18676 | 2.51745  | 0.88429  |
| H | -3.07843 | 3.69863  | -0.05282 |
| C | -3.08483 | 1.72283  | -0.91736 |
| H | -3.30557 | 2.03677  | -1.94528 |
| H | -2.46437 | 0.82261  | -0.96918 |
| H | -4.03227 | 1.44207  | -0.44330 |
| H | 3.59842  | 2.10674  | 0.76699  |

#### 4e\_conformer-258

|   |          |         |          |
|---|----------|---------|----------|
| C | 2.37835  | 2.42113 | -0.29322 |
| C | 0.42825  | 1.25805 | -0.14441 |
| N | 1.16102  | 2.33615 | 0.33337  |
| H | 0.79406  | 3.03244 | 0.96644  |
| C | 2.44269  | 1.35764 | -1.17627 |
| C | 3.35294  | 3.51307 | 0.00501  |
| H | 2.94735  | 4.50394 | -0.23789 |
| H | 3.63755  | 3.52932 | 1.06484  |
| H | 4.26240  | 3.37087 | -0.58489 |
| C | -0.89390 | 0.96006 | 0.40346  |
| C | -1.22606 | 1.32309 | 1.72038  |
| C | -1.86539 | 0.31193 | -0.38521 |
| C | -2.49605 | 1.04372 | 2.22808  |

|   |          |          |          |
|---|----------|----------|----------|
| H | -0.48433 | 1.79213  | 2.35921  |
| C | -3.12505 | 0.01922  | 0.13942  |
| H | -1.62758 | 0.06093  | -1.40885 |
| C | -3.44874 | 0.39154  | 1.45316  |
| H | -2.73971 | 1.32615  | 3.24850  |
| H | -4.43578 | 0.15861  | 1.83914  |
| O | -4.11324 | -0.61549 | -0.55748 |
| C | -3.82266 | -1.04582 | -1.88333 |
| H | -3.60092 | -0.19607 | -2.54028 |
| H | -2.97717 | -1.74430 | -1.89941 |
| H | -4.72121 | -1.55287 | -2.23723 |
| C | 1.22511  | 0.62055  | -1.09930 |
| C | 0.95561  | -0.65863 | -1.84962 |
| H | 0.06789  | -0.56563 | -2.48873 |
| H | 1.79510  | -0.83087 | -2.53544 |
| C | 0.79343  | -1.89783 | -0.94807 |
| H | -0.07364 | -1.75730 | -0.29080 |
| H | 0.56568  | -2.76626 | -1.58193 |
| C | 2.02934  | -2.19815 | -0.09731 |
| H | 2.89834  | -2.34817 | -0.75557 |
| H | 2.26324  | -1.32185 | 0.52173  |
| C | 1.85712  | -3.42398 | 0.80421  |
| H | 0.98603  | -3.27063 | 1.45688  |
| H | 1.62373  | -4.30171 | 0.18502  |
| C | 3.09291  | -3.71405 | 1.65966  |
| H | 3.97185  | -3.90102 | 1.03039  |
| H | 3.32795  | -2.86322 | 2.31103  |
| H | 2.94470  | -4.59310 | 2.29728  |
| H | 3.28581  | 1.12037  | -1.81306 |

#### 4e\_conformer-259

|   |          |         |          |
|---|----------|---------|----------|
| C | -2.37932 | 2.42042 | -0.29306 |
| C | -0.42888 | 1.25792 | -0.14435 |
| N | -1.16197 | 2.33575 | 0.33354  |
| H | -0.79522 | 3.03210 | 0.96666  |
| C | -2.44333 | 1.35701 | -1.17623 |
| C | -3.35425 | 3.51203 | 0.00528  |
| H | -4.26365 | 3.36963 | -0.58467 |
| H | -3.63891 | 3.52803 | 1.06511  |
| H | -2.94895 | 4.50305 | -0.23745 |
| C | 0.89337  | 0.96027 | 0.40349  |
| C | 1.22546  | 1.32341 | 1.72040  |
| C | 1.86501  | 0.31238 | -0.38519 |
| C | 2.49554  | 1.04440 | 2.22807  |
| H | 0.48361  | 1.79223 | 2.35925  |

|   |          |          |          |
|---|----------|----------|----------|
| C | 3.12478  | 0.02009  | 0.13939  |
| H | 1.62720  | 0.06123  | -1.40879 |
| C | 3.44841  | 0.39252  | 1.45311  |
| H | 2.73915  | 1.32691  | 3.24848  |
| H | 4.43554  | 0.15991  | 1.83906  |
| O | 4.11316  | -0.61430 | -0.55755 |
| C | 3.82280  | -1.04435 | -1.88354 |
| H | 2.97751  | -1.74306 | -1.89989 |
| H | 3.60088  | -0.19448 | -2.54027 |
| H | 4.72152  | -1.55107 | -2.23750 |
| C | -1.22553 | 0.62028  | -1.09932 |
| C | -0.95561 | -0.65872 | -1.84980 |
| H | -1.79521 | -0.83132 | -2.53540 |
| H | -0.06812 | -0.56524 | -2.48916 |
| C | -0.79259 | -1.89789 | -0.94836 |
| H | -0.56452 | -2.76617 | -1.58231 |
| H | 0.07455  | -1.75694 | -0.29127 |
| C | -2.02818 | -2.19888 | -0.09738 |
| H | -2.26250 | -1.32267 | 0.52164  |
| H | -2.89720 | -2.34945 | -0.75549 |
| C | -1.85510 | -3.42455 | 0.80420  |
| H | -1.62129 | -4.30219 | 0.18504  |
| H | -0.98400 | -3.27064 | 1.45673  |
| C | -3.09059 | -3.71528 | 1.65985  |
| H | -3.32603 | -2.86454 | 2.31121  |
| H | -3.96952 | -3.90279 | 1.03073  |
| H | -2.94178 | -4.59420 | 2.29751  |
| H | -3.28637 | 1.11956  | -1.81305 |

#### 4e\_conformer-260

|   |          |          |          |
|---|----------|----------|----------|
| C | -2.89712 | -1.90495 | -0.44902 |
| C | -1.08241 | -0.85217 | 0.42821  |
| N | -1.53450 | -1.94885 | -0.29154 |
| H | -0.95012 | -2.72823 | -0.55920 |
| C | -3.32651 | -0.73721 | 0.15675  |
| C | -3.65194 | -2.98615 | -1.15083 |
| H | -3.29435 | -3.13439 | -2.17781 |
| H | -3.56500 | -3.95098 | -0.63407 |
| H | -4.71329 | -2.72795 | -1.19863 |
| C | 0.34602  | -0.66146 | 0.67818  |
| C | 0.80469  | -0.07426 | 1.87479  |
| C | 1.29065  | -1.05583 | -0.27890 |
| C | 2.16501  | 0.12349  | 2.07735  |
| H | 0.09150  | 0.21184  | 2.63986  |
| C | 2.66105  | -0.86655 | -0.06163 |

|   |          |          |          |
|---|----------|----------|----------|
| H | 0.97733  | -1.48298 | -1.22637 |
| C | 3.10900  | -0.26644 | 1.12078  |
| H | 2.50949  | 0.57957  | 3.00136  |
| H | 4.16345  | -0.10289 | 1.30510  |
| O | 3.47843  | -1.28614 | -1.07189 |
| C | 4.88009  | -1.08593 | -0.92040 |
| H | 5.27011  | -1.63058 | -0.05214 |
| H | 5.33810  | -1.47695 | -1.82984 |
| H | 5.12207  | -0.02120 | -0.81796 |
| C | -2.19920 | -0.06614 | 0.71638  |
| C | -2.24968 | 1.29192  | 1.37130  |
| H | -3.28439 | 1.65356  | 1.31219  |
| H | -2.02085 | 1.22053  | 2.44377  |
| C | -1.31333 | 2.34116  | 0.74034  |
| H | -1.45389 | 3.29806  | 1.26213  |
| H | -0.27762 | 2.04133  | 0.92202  |
| C | -1.53050 | 2.54379  | -0.76194 |
| H | -1.52508 | 1.56547  | -1.26008 |
| H | -2.53048 | 2.96926  | -0.92800 |
| C | -0.47314 | 3.44138  | -1.42149 |
| H | -0.78802 | 3.66499  | -2.44955 |
| H | -0.43182 | 4.40709  | -0.89743 |
| C | 0.92707  | 2.81654  | -1.45664 |
| H | 0.90748  | 1.84424  | -1.96429 |
| H | 1.63456  | 3.46128  | -1.99060 |
| H | 1.32691  | 2.64896  | -0.45076 |
| H | -4.35062 | -0.38626 | 0.18691  |

4e\_conformer-261

|   |          |          |          |
|---|----------|----------|----------|
| C | -2.52192 | -2.38710 | -0.13955 |
| C | -0.55290 | -1.24702 | -0.16860 |
| N | -1.26425 | -2.29484 | 0.40059  |
| H | -0.86296 | -2.97229 | 1.03318  |
| C | -2.63346 | -1.35784 | -1.05777 |
| C | -3.48669 | -3.45274 | 0.26662  |
| H | -3.69746 | -3.42529 | 1.34334  |
| H | -4.43302 | -3.31926 | -0.26438 |
| H | -3.11104 | -4.45788 | 0.03436  |
| C | 0.80658  | -0.94696 | 0.27830  |
| C | 1.21570  | -1.25703 | 1.59367  |
| C | 1.73958  | -0.35661 | -0.58458 |
| C | 2.51275  | -0.97865 | 2.00809  |
| H | 0.50712  | -1.68388 | 2.29652  |
| C | 3.03900  | -0.06493 | -0.15493 |
| H | 1.47980  | -0.12718 | -1.61089 |



|   |          |          |          |
|---|----------|----------|----------|
| C | 3.43932  | -0.37917 | 1.14943  |
| H | 2.81354  | -1.21759 | 3.02444  |
| H | 4.44140  | -0.16520 | 1.49966  |
| O | 3.84757  | 0.51531  | -1.09073 |
| C | 5.18717  | 0.81924  | -0.71638 |
| H | 5.65031  | 1.26500  | -1.59763 |
| H | 5.21735  | 1.53563  | 0.11341  |
| H | 5.73790  | -0.08577 | -0.43283 |
| C | -1.40472 | -0.63616 | -1.09215 |
| C | -1.16735 | 0.60738  | -1.90947 |
| H | -0.31929 | 0.47549  | -2.59355 |
| H | -2.04393 | 0.76319  | -2.55146 |
| C | -0.93770 | 1.87906  | -1.07007 |
| H | -0.03676 | 1.75048  | -0.45727 |
| H | -0.73413 | 2.71778  | -1.75037 |
| C | -2.11912 | 2.23346  | -0.16444 |
| H | -3.02139 | 2.37267  | -0.77889 |
| H | -2.33127 | 1.38629  | 0.50126  |
| C | -1.87806 | 3.49054  | 0.67624  |
| H | -0.97452 | 3.34755  | 1.28574  |
| H | -1.66575 | 4.33893  | 0.01034  |
| C | -3.05965 | 3.83614  | 1.58593  |
| H | -3.27148 | 3.01596  | 2.28299  |
| H | -2.86245 | 4.73683  | 2.17850  |
| H | -3.96917 | 4.01389  | 0.99885  |
| H | -3.51483 | -1.13350 | -1.64560 |

4e\_conformer-262

|   |          |          |          |
|---|----------|----------|----------|
| C | -0.07197 | 3.40197  | -0.13110 |
| C | 0.35452  | 1.17354  | 0.01797  |
| N | 0.86875  | 2.41895  | -0.31566 |
| H | 1.77097  | 2.56267  | -0.74604 |
| C | -1.20644 | 2.78091  | 0.35909  |
| C | 0.20445  | 4.83498  | -0.44974 |
| H | 1.06166  | 5.22196  | 0.11588  |
| H | 0.42413  | 4.98369  | -1.51507 |
| H | -0.66682 | 5.44640  | -0.20001 |
| C | 1.18196  | -0.02859 | -0.06748 |
| C | 0.61908  | -1.29069 | -0.35190 |
| C | 2.56944  | 0.05303  | 0.12383  |
| C | 1.43091  | -2.41679 | -0.42401 |
| H | -0.44280 | -1.37790 | -0.54614 |
| C | 3.38183  | -1.08297 | 0.03228  |
| H | 3.04278  | 0.99649  | 0.37744  |
| C | 2.81426  | -2.33403 | -0.23743 |

|   |          |          |          |
|---|----------|----------|----------|
| H | 0.98653  | -3.38313 | -0.64611 |
| H | 3.42353  | -3.22662 | -0.30569 |
| O | 4.71508  | -0.86886 | 0.23715  |
| C | 5.58682  | -1.99319 | 0.17619  |
| H | 5.56242  | -2.46436 | -0.81377 |
| H | 6.58810  | -1.60604 | 0.36937  |
| H | 5.33039  | -2.73920 | 0.93805  |
| C | -0.95279 | 1.38023  | 0.45825  |
| C | -1.92585 | 0.35695  | 0.97090  |
| H | -1.38733 | -0.52297 | 1.34292  |
| H | -2.46872 | 0.77253  | 1.83083  |
| C | -2.95634 | -0.08930 | -0.08219 |
| H | -3.51776 | 0.79005  | -0.42679 |
| H | -2.42955 | -0.47584 | -0.96593 |
| C | -3.92678 | -1.15067 | 0.44056  |
| H | -3.35606 | -2.02703 | 0.78212  |
| H | -4.44862 | -0.76207 | 1.32753  |
| C | -4.95894 | -1.59445 | -0.60052 |
| H | -5.52859 | -0.71811 | -0.94017 |
| H | -4.43471 | -1.98020 | -1.48615 |
| C | -5.92294 | -2.65923 | -0.07134 |
| H | -6.64976 | -2.95878 | -0.83495 |
| H | -5.38031 | -3.55832 | 0.24578  |
| H | -6.48220 | -2.28735 | 0.79600  |
| H | -2.12641 | 3.28222  | 0.63312  |

#### 4e\_conformer-263

|   |          |          |          |
|---|----------|----------|----------|
| C | 3.31955  | -1.72273 | 0.16475  |
| C | 1.68689  | -0.15815 | -0.07962 |
| N | 3.03338  | -0.38012 | 0.17719  |
| H | 3.68281  | 0.34132  | 0.45578  |
| C | 2.13952  | -2.37842 | -0.13459 |
| C | 4.69018  | -2.24465 | 0.44798  |
| H | 5.43421  | -1.84071 | -0.25040 |
| H | 5.02473  | -1.99027 | 1.46222  |
| H | 4.69986  | -3.33408 | 0.35661  |
| C | 1.15804  | 1.20325  | -0.14643 |
| C | 1.97910  | 2.26643  | -0.56238 |
| C | -0.17576 | 1.47784  | 0.21790  |
| C | 1.47708  | 3.56757  | -0.60747 |
| H | 2.99887  | 2.07217  | -0.87973 |
| C | -0.67282 | 2.78175  | 0.14866  |
| H | -0.79713 | 0.67291  | 0.58457  |
| C | 0.15752  | 3.83589  | -0.26041 |
| H | 2.12046  | 4.38073  | -0.93183 |

|   |          |          |          |
|---|----------|----------|----------|
| H | -0.24888 | 4.84134  | -0.29834 |
| O | -1.95051 | 3.13204  | 0.47912  |
| C | -2.85550 | 2.09269  | 0.83577  |
| H | -2.96114 | 1.36391  | 0.02429  |
| H | -2.53270 | 1.57353  | 1.74647  |
| H | -3.81482 | 2.57897  | 1.01756  |
| C | 1.10450  | -1.40794 | -0.29098 |
| C | -0.32041 | -1.72579 | -0.64730 |
| H | -0.80849 | -0.84347 | -1.07405 |
| H | -0.33140 | -2.49423 | -1.43305 |
| C | -1.13468 | -2.25716 | 0.54914  |
| H | -0.58272 | -3.09602 | 0.99216  |
| H | -1.18585 | -1.48353 | 1.32903  |
| C | -2.55124 | -2.71963 | 0.18505  |
| H | -2.49145 | -3.45551 | -0.63056 |
| H | -2.98642 | -3.24990 | 1.04360  |
| C | -3.50186 | -1.58874 | -0.22276 |
| H | -3.56751 | -0.86683 | 0.60300  |
| H | -3.08710 | -1.04099 | -1.07909 |
| C | -4.90439 | -2.08987 | -0.57535 |
| H | -4.87084 | -2.78966 | -1.41935 |
| H | -5.35880 | -2.61617 | 0.27307  |
| H | -5.56838 | -1.26309 | -0.85192 |
| H | 2.02873  | -3.44999 | -0.24516 |

#### 4e\_conformer-264

|   |          |          |          |
|---|----------|----------|----------|
| C | 2.56746  | -2.27824 | -0.19907 |
| C | 0.85101  | -0.94068 | 0.45521  |
| N | 1.20282  | -2.17272 | -0.07747 |
| H | 0.55175  | -2.93081 | -0.22530 |
| C | 3.10047  | -1.07787 | 0.23283  |
| C | 3.22529  | -3.52235 | -0.70019 |
| H | 3.03381  | -4.38185 | -0.04441 |
| H | 2.87364  | -3.79472 | -1.70350 |
| H | 4.30761  | -3.37625 | -0.75150 |
| C | -0.55484 | -0.58052 | 0.64626  |
| C | -0.97515 | 0.16237  | 1.76843  |
| C | -1.51593 | -0.97452 | -0.29460 |
| C | -2.31329 | 0.51114  | 1.91117  |
| H | -0.25565 | 0.43713  | 2.53127  |
| C | -2.86484 | -0.63500 | -0.13436 |
| H | -1.22687 | -1.52423 | -1.18495 |
| C | -3.27248 | 0.12126  | 0.97100  |
| H | -2.62873 | 1.08483  | 2.77824  |
| H | -4.30920 | 0.40181  | 1.10958  |

|   |          |          |          |
|---|----------|----------|----------|
| O | -3.70204 | -1.07463 | -1.11929 |
| C | -5.08119 | -0.73311 | -1.02248 |
| H | -5.53314 | -1.14959 | -0.11427 |
| H | -5.22466 | 0.35408  | -1.03206 |
| H | -5.55977 | -1.17054 | -1.89960 |
| C | 2.03084  | -0.22650 | 0.64962  |
| C | 2.17975  | 1.21123  | 1.06454  |
| H | 1.21886  | 1.60590  | 1.40552  |
| H | 2.86232  | 1.28472  | 1.92243  |
| C | 2.72216  | 2.11104  | -0.06556 |
| H | 2.84399  | 3.12901  | 0.32663  |
| H | 3.72695  | 1.76724  | -0.34380 |
| C | 1.84581  | 2.13546  | -1.32614 |
| H | 2.32385  | 2.78936  | -2.06944 |
| H | 1.82842  | 1.12856  | -1.76227 |
| C | 0.39791  | 2.60288  | -1.11025 |
| H | -0.12177 | 2.57235  | -2.07742 |
| H | -0.12845 | 1.89135  | -0.46401 |
| C | 0.27746  | 4.01090  | -0.51995 |
| H | 0.69500  | 4.06181  | 0.49206  |
| H | 0.81241  | 4.74546  | -1.13532 |
| H | -0.77090 | 4.32488  | -0.45915 |
| H | 4.15443  | -0.82941 | 0.23918  |

#### 4e\_conformer-265

|   |          |          |          |
|---|----------|----------|----------|
| C | -2.56755 | -2.27815 | -0.19915 |
| C | -0.85105 | -0.94071 | 0.45520  |
| N | -1.20290 | -2.17269 | -0.07757 |
| H | -0.55187 | -2.93082 | -0.22539 |
| C | -3.10050 | -1.07780 | 0.23284  |
| C | -3.22543 | -3.52223 | -0.70031 |
| H | -2.87366 | -3.79467 | -1.70356 |
| H | -3.03412 | -4.38172 | -0.04448 |
| H | -4.30773 | -3.37604 | -0.75178 |
| C | 0.55483  | -0.58061 | 0.64626  |
| C | 0.97517  | 0.16210  | 1.76855  |
| C | 1.51589  | -0.97450 | -0.29466 |
| C | 2.31331  | 0.51080  | 1.91133  |
| H | 0.25567  | 0.43675  | 2.53142  |
| C | 2.86481  | -0.63503 | -0.13439 |
| H | 1.22680  | -1.52407 | -1.18508 |
| C | 3.27248  | 0.12105  | 0.97108  |
| H | 2.62878  | 1.08435  | 2.77849  |
| H | 4.30921  | 0.40155  | 1.10970  |
| O | 3.70200  | -1.07454 | -1.11941 |

|   |          |          |          |
|---|----------|----------|----------|
| C | 5.08115  | -0.73305 | -1.02258 |
| H | 5.53311  | -1.14967 | -0.11443 |
| H | 5.55973  | -1.17035 | -1.89976 |
| H | 5.22464  | 0.35413  | -1.03199 |
| C | -2.03084 | -0.22649 | 0.64968  |
| C | -2.17969 | 1.21127  | 1.06457  |
| H | -2.86226 | 1.28481  | 1.92245  |
| H | -1.21878 | 1.60589  | 1.40556  |
| C | -2.72206 | 2.11106  | -0.06556 |
| H | -3.72683 | 1.76724  | -0.34383 |
| H | -2.84393 | 3.12903  | 0.32662  |
| C | -1.84565 | 2.13549  | -1.32610 |
| H | -1.82819 | 1.12859  | -1.76220 |
| H | -2.32370 | 2.78935  | -2.06944 |
| C | -0.39778 | 2.60301  | -1.11017 |
| H | 0.12860  | 1.89151  | -0.46390 |
| H | 0.12192  | 2.57248  | -2.07732 |
| C | -0.27745 | 4.01104  | -0.51989 |
| H | 0.77089  | 4.32511  | -0.45911 |
| H | -0.81247 | 4.74555  | -1.13525 |
| H | -0.69496 | 4.06193  | 0.49214  |
| H | -4.15445 | -0.82930 | 0.23922  |

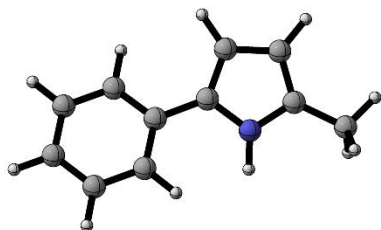

\*\*\* Note: the conformers for 4f were also used for 4i, 4j, and 4k  
4f\_conformer-001

|   |          |          |          |
|---|----------|----------|----------|
| C | -0.55411 | 0.34176  | -0.04717 |
| C | -1.27294 | 1.51364  | -0.24960 |
| C | -2.65606 | 1.19157  | -0.19955 |
| C | -2.76770 | -0.16874 | 0.03650  |
| N | -1.48866 | -0.66742 | 0.11442  |
| H | -1.26719 | -1.62197 | 0.35783  |
| H | -0.84305 | 2.48627  | -0.44716 |
| H | -3.48752 | 1.87204  | -0.32816 |
| C | -3.96831 | -1.04200 | 0.20131  |
| H | -3.99722 | -1.84414 | -0.54724 |
| H | -3.99660 | -1.51825 | 1.18997  |
| H | -4.87864 | -0.44677 | 0.09087  |
| C | 0.88430  | 0.09756  | -0.01714 |
| C | 1.42268  | -1.18845 | -0.21188 |

|   |         |          |          |
|---|---------|----------|----------|
| C | 1.77910 | 1.16245  | 0.20428  |
| C | 2.79994 | -1.40086 | -0.17842 |
| H | 0.76470 | -2.02840 | -0.41638 |
| C | 3.15446 | 0.94931  | 0.22419  |
| H | 1.38573 | 2.15973  | 0.37648  |
| C | 3.67523 | -0.33464 | 0.03720  |
| H | 3.18956 | -2.40334 | -0.33238 |
| H | 3.82327 | 1.78792  | 0.39747  |
| H | 4.74818 | -0.50075 | 0.05942  |

4f\_conformer-002

|   |          |          |          |
|---|----------|----------|----------|
| C | 0.55411  | 0.34176  | -0.04717 |
| C | 1.27294  | 1.51364  | -0.24960 |
| C | 2.65606  | 1.19157  | -0.19955 |
| C | 2.76770  | -0.16874 | 0.03650  |
| N | 1.48866  | -0.66742 | 0.11442  |
| H | 1.26719  | -1.62197 | 0.35783  |
| H | 0.84305  | 2.48627  | -0.44716 |
| H | 3.48752  | 1.87204  | -0.32816 |
| C | 3.96831  | -1.04200 | 0.20131  |
| H | 3.99660  | -1.51825 | 1.18997  |
| H | 3.99722  | -1.84414 | -0.54724 |
| H | 4.87864  | -0.44677 | 0.09087  |
| C | -0.88430 | 0.09756  | -0.01714 |
| C | -1.42268 | -1.18845 | -0.21188 |
| C | -1.77910 | 1.16245  | 0.20428  |
| C | -2.79994 | -1.40086 | -0.17842 |
| H | -0.76470 | -2.02840 | -0.41638 |
| C | -3.15446 | 0.94931  | 0.22419  |
| H | -1.38573 | 2.15973  | 0.37648  |
| C | -3.67523 | -0.33464 | 0.03720  |
| H | -3.18956 | -2.40334 | -0.33238 |
| H | -3.82327 | 1.78792  | 0.39747  |
| H | -4.74818 | -0.50075 | 0.05942  |

4f\_conformer-003

|   |          |          |          |
|---|----------|----------|----------|
| C | -0.55413 | 0.34176  | 0.04715  |
| C | -1.27296 | 1.51366  | 0.24949  |
| C | -2.65610 | 1.19159  | 0.19944  |
| C | -2.76773 | -0.16874 | -0.03650 |
| N | -1.48869 | -0.66744 | -0.11439 |
| H | -1.26726 | -1.62206 | -0.35749 |
| H | -0.84307 | 2.48632  | 0.44693  |
| H | -3.48758 | 1.87206  | 0.32796  |

|   |          |          |          |
|---|----------|----------|----------|
| C | -3.96833 | -1.04201 | -0.20120 |
| H | -3.99642 | -1.51868 | -1.18967 |
| H | -3.99745 | -1.84384 | 0.54768  |
| H | -4.87864 | -0.44667 | -0.09120 |
| C | 0.88428  | 0.09755  | 0.01714  |
| C | 1.42271  | -1.18847 | 0.21177  |
| C | 1.77912  | 1.16245  | -0.20418 |
| C | 2.79998  | -1.40086 | 0.17833  |
| H | 0.76477  | -2.02848 | 0.41611  |
| C | 3.15448  | 0.94933  | -0.22408 |
| H | 1.38577  | 2.15976  | -0.37628 |
| C | 3.67529  | -0.33463 | -0.03717 |
| H | 3.18960  | -2.40337 | 0.33220  |
| H | 3.82328  | 1.78797  | -0.39728 |
| H | 4.74824  | -0.50073 | -0.05939 |

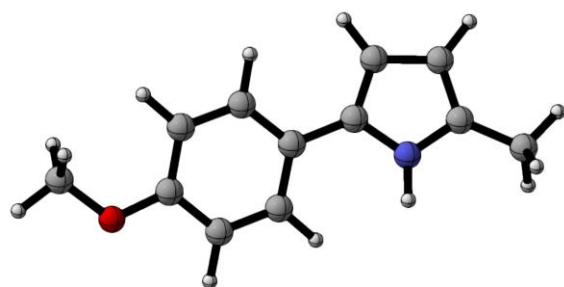

4g\_conformer-001

27

|   |          |          |          |
|---|----------|----------|----------|
| C | 1.45176  | 0.35045  | -0.06892 |
| C | 2.17252  | 1.51653  | -0.29147 |
| C | 3.55632  | 1.19770  | -0.20410 |
| C | 3.66515  | -0.15422 | 0.07193  |
| N | 2.38342  | -0.65224 | 0.13987  |
| H | 2.15641  | -1.59866 | 0.40865  |
| H | 1.74457  | 2.48181  | -0.52656 |
| H | 4.38941  | 1.87561  | -0.33668 |
| C | 0.01291  | 0.10211  | -0.05362 |
| C | -0.52495 | -1.18300 | -0.26714 |
| C | -0.89174 | 1.15224  | 0.16946  |
| C | -1.89517 | -1.40409 | -0.24954 |
| H | 0.13409  | -2.02149 | -0.47402 |
| C | -2.27064 | 0.94657  | 0.17525  |
| H | -0.51044 | 2.15150  | 0.35703  |
| C | -2.78235 | -0.34075 | -0.03049 |

|   |          |          |          |
|---|----------|----------|----------|
| H | -2.30136 | -2.39676 | -0.41713 |
| H | -2.92988 | 1.78766  | 0.35313  |
| O | -4.11034 | -0.65788 | -0.03610 |
| C | -5.04536 | 0.39511  | 0.17447  |
| H | -4.96378 | 1.16307  | -0.60430 |
| H | -6.03234 | -0.06677 | 0.12720  |
| H | -4.90715 | 0.86119  | 1.15760  |
| C | 4.86241  | -1.02232 | 0.28263  |
| H | 4.87237  | -1.47352 | 1.28349  |
| H | 4.90716  | -1.84357 | -0.44434 |
| H | 5.77465  | -0.42934 | 0.17486  |

4g\_conformer-002

27

|   |          |          |          |
|---|----------|----------|----------|
| C | -1.45176 | 0.35057  | -0.06901 |
| C | -2.17262 | 1.51653  | -0.29178 |
| C | -3.55642 | 1.19756  | -0.20431 |
| C | -3.66511 | -0.15430 | 0.07201  |
| N | -2.38331 | -0.65219 | 0.13995  |
| H | -2.15616 | -1.59841 | 0.40938  |
| H | -1.74477 | 2.48178  | -0.52717 |
| H | -4.38959 | 1.87536  | -0.33704 |
| C | -0.01290 | 0.10227  | -0.05371 |
| C | 0.52490  | -1.18282 | -0.26750 |
| C | 0.89177  | 1.15231  | 0.16964  |
| C | 1.89510  | -1.40399 | -0.24987 |
| H | -0.13423 | -2.02118 | -0.47466 |
| C | 2.27066  | 0.94658  | 0.17544  |
| H | 0.51048  | 2.15154  | 0.35745  |
| C | 2.78231  | -0.34073 | -0.03054 |
| H | 2.30125  | -2.39663 | -0.41766 |
| H | 2.92993  | 1.78759  | 0.35354  |
| O | 4.11029  | -0.65793 | -0.03613 |
| C | 5.04538  | 0.39494  | 0.17472  |
| H | 4.90711  | 0.86085  | 1.15792  |
| H | 6.03232  | -0.06702 | 0.12745  |
| H | 4.96394  | 1.16305  | -0.60391 |
| C | -4.86227 | -1.02245 | 0.28302  |
| H | -4.87238 | -1.47300 | 1.28417  |
| H | -5.77458 | -0.42970 | 0.17466  |
| H | -4.90672 | -1.84419 | -0.44342 |

4g\_conformer-003



27

|   |          |          |          |
|---|----------|----------|----------|
| C | -1.47280 | 0.37735  | -0.06105 |
| C | -2.31588 | 1.45698  | -0.29028 |
| C | -3.65651 | 0.98482  | -0.22778 |
| C | -3.61773 | -0.37233 | 0.04102  |
| N | -2.28957 | -0.72447 | 0.12798  |
| H | -1.96245 | -1.64077 | 0.39824  |
| H | -1.99523 | 2.46564  | -0.51367 |
| H | -4.55802 | 1.56623  | -0.37071 |
| C | -0.01568 | 0.29302  | -0.02353 |
| C | 0.66840  | -0.91603 | -0.22151 |
| C | 0.76026  | 1.44684  | 0.21122  |
| C | 2.06207  | -0.98869 | -0.17988 |
| H | 0.11424  | -1.82523 | -0.43722 |
| C | 2.14495  | 1.39111  | 0.24112  |
| H | 0.26344  | 2.39622  | 0.38667  |
| C | 2.81085  | 0.17017  | 0.05045  |
| H | 2.54584  | -1.94472 | -0.33985 |
| H | 2.73523  | 2.28347  | 0.42520  |
| O | 4.17411  | 0.21751  | 0.10781  |
| C | 4.88805  | -1.00129 | -0.07102 |
| H | 4.69860  | -1.43327 | -1.06117 |
| H | 5.94469  | -0.74564 | 0.01749  |
| H | 4.62370  | -1.73523 | 0.69996  |
| C | -4.71383 | -1.36929 | 0.23054  |
| H | -4.65353 | -2.18901 | -0.49698 |
| H | -4.69076 | -1.82068 | 1.23114  |
| H | -5.68462 | -0.88181 | 0.10668  |

4g\_conformer-004

27

|   |          |          |          |
|---|----------|----------|----------|
| C | 1.47280  | 0.37735  | -0.06104 |
| C | 2.31587  | 1.45699  | -0.29027 |
| C | 3.65651  | 0.98483  | -0.22777 |
| C | 3.61773  | -0.37233 | 0.04101  |
| N | 2.28957  | -0.72448 | 0.12798  |
| H | 1.96245  | -1.64078 | 0.39821  |
| H | 1.99523  | 2.46564  | -0.51364 |
| H | 4.55801  | 1.56624  | -0.37070 |
| C | 0.01568  | 0.29302  | -0.02353 |
| C | -0.66840 | -0.91604 | -0.22149 |
| C | -0.76026 | 1.44684  | 0.21121  |
| C | -2.06207 | -0.98869 | -0.17986 |

|   |          |          |          |
|---|----------|----------|----------|
| H | -0.11424 | -1.82524 | -0.43718 |
| C | -2.14495 | 1.39111  | 0.24111  |
| H | -0.26344 | 2.39622  | 0.38665  |
| C | -2.81085 | 0.17017  | 0.05045  |
| H | -2.54584 | -1.94472 | -0.33983 |
| H | -2.73523 | 2.28347  | 0.42518  |
| O | -4.17411 | 0.21751  | 0.10781  |
| C | -4.88805 | -1.00129 | -0.07102 |
| H | -4.62371 | -1.73522 | 0.69996  |
| H | -5.94469 | -0.74564 | 0.01748  |
| H | -4.69860 | -1.43328 | -1.06116 |
| C | 4.71383  | -1.36929 | 0.23053  |
| H | 4.69077  | -1.82069 | 1.23111  |
| H | 4.65354  | -2.18901 | -0.49700 |
| H | 5.68462  | -0.88180 | 0.10667  |

4g\_conformer-005

27

|   |          |          |          |
|---|----------|----------|----------|
| C | -1.45179 | 0.35052  | -0.06884 |
| C | -2.17261 | 1.51657  | -0.29131 |
| C | -3.55636 | 1.19764  | -0.20398 |
| C | -3.66511 | -0.15431 | 0.07196  |
| N | -2.38336 | -0.65224 | 0.13992  |
| H | -2.15627 | -1.59872 | 0.40841  |
| H | -1.74471 | 2.48189  | -0.52631 |
| H | -4.38951 | 1.87550  | -0.33651 |
| C | -0.01293 | 0.10223  | -0.05362 |
| C | 0.52494  | -1.18289 | -0.26707 |
| C | 0.89173  | 1.15236  | 0.16926  |
| C | 1.89514  | -1.40397 | -0.24960 |
| H | -0.13412 | -2.02139 | -0.47389 |
| C | 2.27064  | 0.94673  | 0.17496  |
| H | 0.51043  | 2.15166  | 0.35669  |
| C | 2.78235  | -0.34060 | -0.03063 |
| H | 2.30133  | -2.39662 | -0.41721 |
| H | 2.92984  | 1.78790  | 0.35257  |
| O | 4.11024  | -0.65793 | -0.03613 |
| C | 5.04546  | 0.39480  | 0.17474  |
| H | 4.90723  | 0.86079  | 1.15790  |
| H | 6.03232  | -0.06733 | 0.12759  |
| H | 4.96419  | 1.16288  | -0.60394 |
| C | -4.86233 | -1.02249 | 0.28255  |
| H | -4.90706 | -1.84365 | -0.44452 |
| H | -4.87226 | -1.47383 | 1.28335  |

H -5.77459 -0.42953 0.17486

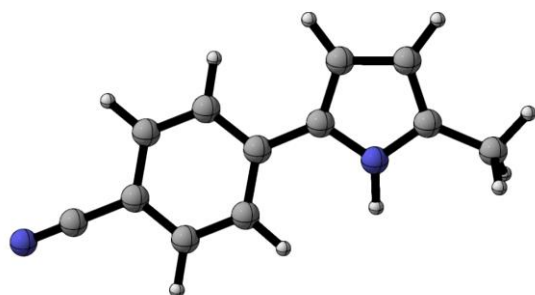

4h\_conformer-001

24

|   |          |          |          |
|---|----------|----------|----------|
| C | -1.29192 | 0.35258  | -0.03138 |
| C | -2.06714 | 1.50209  | -0.16902 |
| C | -3.42863 | 1.11611  | -0.13436 |
| C | -3.47642 | -0.26174 | 0.02963  |
| N | -2.18050 | -0.70597 | 0.07802  |
| H | -1.92124 | -1.66462 | 0.26031  |
| H | -1.68588 | 2.50398  | -0.31024 |
| H | -4.29090 | 1.76313  | -0.22326 |
| C | 0.14830  | 0.18249  | -0.01946 |
| C | 0.75262  | -1.08493 | -0.16143 |
| C | 0.99316  | 1.30394  | 0.13357  |
| C | 2.13138  | -1.23028 | -0.14471 |
| H | 0.14231  | -1.96979 | -0.30900 |
| C | 2.37085  | 1.17027  | 0.14290  |
| H | 0.55628  | 2.28843  | 0.26038  |
| C | 2.95717  | -0.10274 | 0.00707  |
| H | 2.57642  | -2.21311 | -0.25731 |
| H | 3.00284  | 2.04360  | 0.26400  |
| C | -4.63734 | -1.19270 | 0.15184  |
| H | -5.57276 | -0.63359 | 0.06903  |
| H | -4.64055 | -1.71483 | 1.11705  |
| H | -4.62920 | -1.95819 | -0.63407 |
| C | 4.37695  | -0.24702 | 0.02295  |
| N | 5.53604  | -0.36453 | 0.03591  |

4h\_conformer-002

24

|   |         |         |          |
|---|---------|---------|----------|
| C | 1.29192 | 0.35258 | -0.03138 |
|---|---------|---------|----------|

|   |          |          |          |
|---|----------|----------|----------|
| C | 2.06714  | 1.50209  | -0.16903 |
| C | 3.42863  | 1.11611  | -0.13436 |
| C | 3.47642  | -0.26174 | 0.02964  |
| N | 2.18050  | -0.70597 | 0.07802  |
| H | 1.92124  | -1.66462 | 0.26032  |
| H | 1.68588  | 2.50398  | -0.31025 |
| H | 4.29090  | 1.76312  | -0.22326 |
| C | -0.14830 | 0.18249  | -0.01947 |
| C | -0.75262 | -1.08493 | -0.16144 |
| C | -0.99316 | 1.30394  | 0.13357  |
| C | -2.13138 | -1.23027 | -0.14472 |
| H | -0.14231 | -1.96979 | -0.30902 |
| C | -2.37085 | 1.17027  | 0.14291  |
| H | -0.55628 | 2.28843  | 0.26038  |
| C | -2.95717 | -0.10274 | 0.00707  |
| H | -2.57642 | -2.21311 | -0.25732 |
| H | -3.00284 | 2.04360  | 0.26401  |
| C | 4.63734  | -1.19270 | 0.15185  |
| H | 4.64051  | -1.71488 | 1.11704  |
| H | 4.62923  | -1.95816 | -0.63409 |
| H | 5.57276  | -0.63359 | 0.06910  |
| C | -4.37695 | -0.24703 | 0.02295  |
| N | -5.53604 | -0.36453 | 0.03592  |

4h\_conformer-003

24

|   |          |          |          |
|---|----------|----------|----------|
| C | 1.29192  | 0.35255  | 0.03129  |
| C | 2.06713  | 1.50213  | 0.16857  |
| C | 3.42861  | 1.11619  | 0.13403  |
| C | 3.47644  | -0.26172 | -0.02951 |
| N | 2.18055  | -0.70600 | -0.07778 |
| H | 1.92133  | -1.66476 | -0.25956 |
| H | 1.68585  | 2.50406  | 0.30947  |
| H | 4.29086  | 1.76326  | 0.22270  |
| C | -0.14829 | 0.18244  | 0.01937  |
| C | -0.75264 | -1.08502 | 0.16092  |
| C | -0.99316 | 1.30395  | -0.13326 |
| C | -2.13140 | -1.23034 | 0.14426  |
| H | -0.14236 | -1.96996 | 0.30814  |
| C | -2.37085 | 1.17030  | -0.14253 |
| H | -0.55631 | 2.28848  | -0.25981 |
| C | -2.95719 | -0.10275 | -0.00706 |
| H | -2.57644 | -2.21321 | 0.25655  |
| H | -3.00284 | 2.04368  | -0.26330 |

|   |          |          |          |
|---|----------|----------|----------|
| C | 4.63739  | -1.19268 | -0.15142 |
| H | 4.62927  | -1.95793 | 0.63473  |
| H | 4.64061  | -1.71512 | -1.11647 |
| H | 5.57279  | -0.63352 | -0.06878 |
| C | -4.37697 | -0.24700 | -0.02285 |
| N | -5.53606 | -0.36447 | -0.03572 |

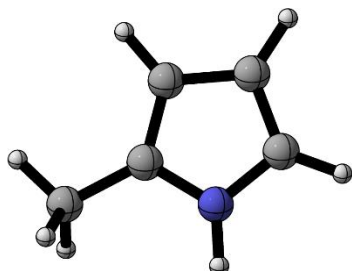

4l\_conformer-001

|   |          |          |          |
|---|----------|----------|----------|
| C | 0.65692  | 0.08280  | 0.00004  |
| C | -0.20086 | 1.16780  | 0.00001  |
| C | -1.53951 | 0.67088  | -0.00008 |
| C | -1.46391 | -0.70614 | -0.00010 |
| N | -0.13023 | -1.04859 | -0.00002 |
| H | 0.22329  | -1.99449 | -0.00002 |
| H | 0.10849  | 2.20511  | 0.00004  |
| H | -2.44995 | 1.25566  | -0.00012 |
| H | -2.23272 | -1.46499 | -0.00015 |
| C | 2.15015  | 0.00950  | 0.00012  |
| H | 2.53727  | -0.51454 | 0.88375  |
| H | 2.53738  | -0.51439 | -0.88355 |
| H | 2.57111  | 1.01875  | 0.00023  |

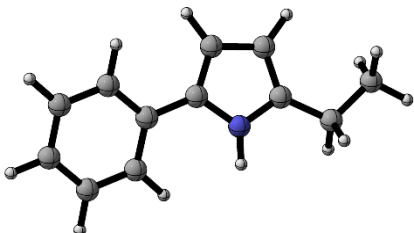

4m\_conformer-001

|   |         |          |          |
|---|---------|----------|----------|
| C | 0.07451 | 0.36356  | -0.05276 |
| C | 0.77603 | 1.54482  | -0.25823 |
| C | 2.16460 | 1.24340  | -0.21252 |
| C | 2.29664 | -0.11575 | 0.02431  |
| N | 1.02427 | -0.63176 | 0.10625  |
| H | 0.81758 | -1.58896 | 0.35252  |
| H | 0.33257 | 2.51145  | -0.45547 |
| H | 2.98077 | 1.93994  | -0.34526 |
| C | 3.50619 | -0.98639 | 0.18865  |

|   |          |          |          |
|---|----------|----------|----------|
| H | 3.47393  | -1.48086 | 1.17036  |
| H | 3.47909  | -1.79786 | -0.55270 |
| C | -1.36013 | 0.09862  | -0.01812 |
| C | -1.88053 | -1.19460 | -0.21384 |
| C | -2.26937 | 1.15002  | 0.20885  |
| C | -3.25446 | -1.42698 | -0.17591 |
| H | -1.21109 | -2.02434 | -0.42269 |
| C | -3.64143 | 0.91698  | 0.23317  |
| H | -1.88967 | 2.15246  | 0.38187  |
| C | -4.14425 | -0.37398 | 0.04523  |
| H | -3.63013 | -2.43465 | -0.33075 |
| H | -4.32170 | 1.74543  | 0.41072  |
| H | -5.21460 | -0.55563 | 0.07097  |
| C | 4.82206  | -0.21653 | 0.05196  |
| H | 4.90278  | 0.25290  | -0.93436 |
| H | 4.89620  | 0.57315  | 0.80734  |
| H | 5.67528  | -0.88978 | 0.17899  |

4m\_conformer-002

|   |          |          |          |
|---|----------|----------|----------|
| C | -0.07451 | 0.36356  | -0.05276 |
| C | -0.77603 | 1.54482  | -0.25823 |
| C | -2.16460 | 1.24340  | -0.21252 |
| C | -2.29664 | -0.11575 | 0.02431  |
| N | -1.02427 | -0.63176 | 0.10625  |
| H | -0.81758 | -1.58896 | 0.35252  |
| H | -0.33257 | 2.51145  | -0.45547 |
| H | -2.98077 | 1.93994  | -0.34526 |
| C | -3.50619 | -0.98639 | 0.18865  |
| H | -3.47909 | -1.79786 | -0.55270 |
| H | -3.47393 | -1.48086 | 1.17036  |
| C | 1.36013  | 0.09862  | -0.01812 |
| C | 1.88053  | -1.19460 | -0.21384 |
| C | 2.26937  | 1.15002  | 0.20885  |
| C | 3.25446  | -1.42698 | -0.17591 |
| H | 1.21109  | -2.02434 | -0.42269 |
| C | 3.64143  | 0.91698  | 0.23317  |
| H | 1.88967  | 2.15246  | 0.38187  |
| C | 4.14425  | -0.37398 | 0.04523  |
| H | 3.63013  | -2.43465 | -0.33075 |
| H | 4.32170  | 1.74543  | 0.41072  |
| H | 5.21460  | -0.55563 | 0.07097  |
| C | -4.82206 | -0.21653 | 0.05196  |
| H | -4.90278 | 0.25290  | -0.93436 |
| H | -5.67528 | -0.88978 | 0.17899  |
| H | -4.89620 | 0.57315  | 0.80734  |

4m\_conformer-003

|   |          |          |          |
|---|----------|----------|----------|
| C | 0.12429  | 0.55312  | -0.00579 |
| C | 0.70880  | 1.77499  | -0.31689 |
| C | 2.11516  | 1.63635  | -0.16772 |
| C | 2.37490  | 0.33709  | 0.23681  |
| N | 1.16102  | -0.30627 | 0.31626  |
| H | 1.03827  | -1.24317 | 0.67228  |
| H | 0.17767  | 2.65757  | -0.64686 |
| H | 2.86578  | 2.39595  | -0.34263 |
| C | 3.66397  | -0.36615 | 0.52629  |
| H | 4.46054  | 0.38497  | 0.55488  |
| H | 3.62948  | -0.82009 | 1.52665  |
| C | -1.27424 | 0.13611  | -0.00408 |
| C | -1.64262 | -1.22044 | -0.07836 |
| C | -2.30060 | 1.09778  | 0.06652  |
| C | -2.98411 | -1.59920 | -0.07238 |
| H | -0.87822 | -1.98734 | -0.16704 |
| C | -3.63949 | 0.71708  | 0.05898  |
| H | -2.03929 | 2.14885  | 0.14367  |
| C | -3.99128 | -0.63447 | -0.00558 |
| H | -3.24181 | -2.65306 | -0.13097 |
| H | -4.41254 | 1.47854  | 0.11527  |
| H | -5.03610 | -0.93057 | -0.00439 |
| C | 4.01290  | -1.45076 | -0.50814 |
| H | 4.09619  | -1.01676 | -1.51028 |
| H | 4.96528  | -1.93170 | -0.25993 |
| H | 3.24163  | -2.22833 | -0.54240 |

4m\_conformer-004

|   |          |          |          |
|---|----------|----------|----------|
| C | -0.12430 | 0.55318  | -0.00583 |
| C | -0.70878 | 1.77507  | -0.31696 |
| C | -2.11515 | 1.63645  | -0.16785 |
| C | -2.37493 | 0.33720  | 0.23668  |
| N | -1.16107 | -0.30618 | 0.31618  |
| H | -1.03835 | -1.24309 | 0.67219  |
| H | -0.17762 | 2.65764  | -0.64692 |
| H | -2.86575 | 2.39607  | -0.34278 |
| C | -3.66401 | -0.36601 | 0.52618  |
| H | -3.62974 | -0.81947 | 1.52676  |
| H | -4.46064 | 0.38507  | 0.55422  |
| C | 1.27420  | 0.13613  | -0.00409 |
| C | 2.30060  | 1.09777  | 0.06663  |
| C | 1.64255  | -1.22042 | -0.07846 |

|   |          |          |          |
|---|----------|----------|----------|
| C | 3.63947  | 0.71703  | 0.05913  |
| H | 2.03931  | 2.14884  | 0.14385  |
| C | 2.98402  | -1.59922 | -0.07245 |
| H | 0.87812  | -1.98729 | -0.16725 |
| C | 3.99123  | -0.63453 | -0.00552 |
| H | 4.41255  | 1.47846  | 0.11551  |
| H | 3.24169  | -2.65309 | -0.13110 |
| H | 5.03603  | -0.93066 | -0.00430 |
| C | -4.01259 | -1.45114 | -0.50782 |
| H | -3.24127 | -2.22868 | -0.54149 |
| H | -4.96501 | -1.93203 | -0.25962 |
| H | -4.09565 | -1.01764 | -1.51019 |

4m\_conformer-005

|   |          |          |          |
|---|----------|----------|----------|
| C | 0.12971  | 0.52435  | -0.13946 |
| C | 0.72265  | 1.78060  | -0.18787 |
| C | 2.12723  | 1.59624  | -0.29581 |
| C | 2.37865  | 0.23376  | -0.30860 |
| N | 1.15918  | -0.39757 | -0.22276 |
| H | 1.04184  | -1.39707 | -0.14081 |
| H | 0.19317  | 2.72375  | -0.18381 |
| H | 2.88147  | 2.36920  | -0.36427 |
| C | 3.66556  | -0.52919 | -0.35262 |
| H | 3.63316  | -1.27572 | -1.15827 |
| H | 4.46600  | 0.17218  | -0.61145 |
| C | -1.27378 | 0.13465  | -0.04871 |
| C | -1.71415 | -1.14752 | -0.42762 |
| C | -2.23353 | 1.05081  | 0.42366  |
| C | -3.05903 | -1.50081 | -0.32923 |
| H | -1.00762 | -1.86973 | -0.82693 |
| C | -3.57768 | 0.69935  | 0.50830  |
| H | -1.91396 | 2.03917  | 0.73987  |
| C | -4.00003 | -0.58062 | 0.13686  |
| H | -3.37271 | -2.49700 | -0.62868 |
| H | -4.29803 | 1.42456  | 0.87677  |
| H | -5.04799 | -0.85587 | 0.20981  |
| C | 4.00636  | -1.23180 | 0.97370  |
| H | 4.96029  | -1.76470 | 0.89614  |
| H | 4.08294  | -0.50363 | 1.78821  |
| H | 3.23548  | -1.96114 | 1.24700  |

4m\_conformer-006

|   |          |         |          |
|---|----------|---------|----------|
| C | -0.12971 | 0.52435 | -0.13946 |
| C | -0.72265 | 1.78061 | -0.18785 |



|   |          |          |          |
|---|----------|----------|----------|
| C | -2.12723 | 1.59625  | -0.29579 |
| C | -2.37865 | 0.23377  | -0.30859 |
| N | -1.15919 | -0.39756 | -0.22276 |
| H | -1.04184 | -1.39706 | -0.14081 |
| H | -0.19317 | 2.72376  | -0.18379 |
| H | -2.88147 | 2.36921  | -0.36425 |
| C | -3.66556 | -0.52918 | -0.35262 |
| H | -4.46601 | 0.17220  | -0.61142 |
| H | -3.63318 | -1.27568 | -1.15829 |
| C | 1.27378  | 0.13465  | -0.04871 |
| C | 1.71415  | -1.14752 | -0.42762 |
| C | 2.23353  | 1.05082  | 0.42365  |
| C | 3.05902  | -1.50081 | -0.32922 |
| H | 1.00761  | -1.86973 | -0.82691 |
| C | 3.57768  | 0.69934  | 0.50829  |
| H | 1.91397  | 2.03917  | 0.73986  |
| C | 4.00002  | -0.58062 | 0.13686  |
| H | 3.37270  | -2.49701 | -0.62868 |
| H | 4.29804  | 1.42455  | 0.87675  |
| H | 5.04799  | -0.85588 | 0.20980  |
| C | -4.00634 | -1.23182 | 0.97369  |
| H | -4.08291 | -0.50369 | 1.78822  |
| H | -4.96027 | -1.76474 | 0.89612  |
| H | -3.23546 | -1.96117 | 1.24695  |

#### 4m\_conformer-007

|   |          |          |          |
|---|----------|----------|----------|
| C | -0.07451 | 0.36360  | -0.05273 |
| C | -0.77604 | 1.54485  | -0.25826 |
| C | -2.16461 | 1.24338  | -0.21255 |
| C | -2.29661 | -0.11576 | 0.02434  |
| N | -1.02423 | -0.63173 | 0.10633  |
| H | -0.81749 | -1.58895 | 0.35252  |
| H | -0.33257 | 2.51146  | -0.45555 |
| H | -2.98081 | 1.93989  | -0.34533 |
| C | -3.50615 | -0.98639 | 0.18870  |
| H | -3.47900 | -1.79793 | -0.55259 |
| H | -3.47392 | -1.48079 | 1.17045  |
| C | 1.36011  | 0.09866  | -0.01810 |
| C | 2.26937  | 1.15003  | 0.20890  |
| C | 1.88047  | -1.19458 | -0.21386 |
| C | 3.64143  | 0.91695  | 0.23317  |
| H | 1.88968  | 2.15246  | 0.38199  |
| C | 3.25440  | -1.42700 | -0.17596 |
| H | 1.21097  | -2.02428 | -0.42270 |
| C | 4.14423  | -0.37402 | 0.04518  |

|   |          |          |          |
|---|----------|----------|----------|
| H | 4.32174  | 1.74537  | 0.41075  |
| H | 3.63005  | -2.43467 | -0.33083 |
| H | 5.21458  | -0.55569 | 0.07089  |
| C | -4.82201 | -0.21656 | 0.05190  |
| H | -4.90270 | 0.25279  | -0.93447 |
| H | -5.67524 | -0.88981 | 0.17895  |
| H | -4.89619 | 0.57319  | 0.80721  |

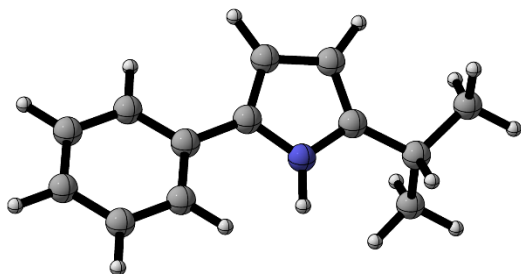

4n\_conformer-001

|   |          |          |          |
|---|----------|----------|----------|
| C | 0.25011  | 0.50119  | -0.07225 |
| C | -0.37011 | 1.74459  | -0.06987 |
| C | -1.77403 | 1.53366  | -0.13623 |
| C | -1.99853 | 0.16602  | -0.17395 |
| N | -0.76294 | -0.43950 | -0.14405 |
| H | -0.62227 | -1.43799 | -0.09292 |
| H | 0.13839  | 2.69917  | -0.05975 |
| H | -2.53933 | 2.29675  | -0.16322 |
| C | 1.66343  | 0.13885  | -0.03934 |
| C | 2.11543  | -1.12599 | -0.46042 |
| C | 2.62108  | 1.06510  | 0.41736  |
| C | 3.46988  | -1.45285 | -0.41839 |
| H | 1.40945  | -1.85505 | -0.84812 |
| C | 3.97423  | 0.74019  | 0.44610  |
| H | 2.29341  | 2.04005  | 0.76532  |
| C | 4.40852  | -0.52275 | 0.03252  |
| H | 3.79245  | -2.43601 | -0.74979 |
| H | 4.69277  | 1.47268  | 0.80354  |
| H | 5.46381  | -0.77736 | 0.06160  |
| C | -3.47034 | -1.40295 | 1.12779  |
| H | -3.58004 | -0.69660 | 1.95876  |
| H | -4.37315 | -2.02237 | 1.08036  |
| H | -2.62241 | -2.05903 | 1.35275  |
| C | -4.48255 | 0.23620  | -0.51205 |
| H | -4.63326 | 0.98696  | 0.27242  |
| H | -4.36032 | 0.76103  | -1.46515 |
| H | -5.38840 | -0.37599 | -0.56889 |
| C | -3.26630 | -0.64253 | -0.19796 |
| H | -3.17544 | -1.39215 | -0.99842 |

## 4n\_conformer-002

|   |          |          |          |
|---|----------|----------|----------|
| C | -0.25008 | 0.50130  | -0.07216 |
| C | 0.37009  | 1.74472  | -0.06982 |
| C | 1.77401  | 1.53383  | -0.13624 |
| C | 1.99857  | 0.16620  | -0.17397 |
| N | 0.76299  | -0.43936 | -0.14400 |
| H | 0.62233  | -1.43784 | -0.09272 |
| H | -0.13843 | 2.69930  | -0.05969 |
| H | 2.53930  | 2.29694  | -0.16331 |
| C | -1.66339 | 0.13891  | -0.03926 |
| C | -2.62110 | 1.06513  | 0.41736  |
| C | -2.11531 | -1.12597 | -0.46031 |
| C | -3.97424 | 0.74017  | 0.44603  |
| H | -2.29350 | 2.04011  | 0.76529  |
| C | -3.46975 | -1.45289 | -0.41834 |
| H | -1.40928 | -1.85501 | -0.84796 |
| C | -4.40846 | -0.52281 | 0.03247  |
| H | -4.69283 | 1.47264  | 0.80340  |
| H | -3.79226 | -2.43607 | -0.74973 |
| H | -5.46374 | -0.77746 | 0.06150  |
| C | 4.48272  | 0.23689  | -0.51071 |
| H | 4.63300  | 0.98667  | 0.27478  |
| H | 5.38862  | -0.37519 | -0.56788 |
| H | 4.36094  | 0.76291  | -1.46321 |
| C | 3.46981  | -1.40437 | 1.12657  |
| H | 2.62197  | -2.06105 | 1.35014  |
| H | 4.37284  | -2.02345 | 1.07888  |
| H | 3.57877  | -0.69908 | 1.95853  |
| C | 3.26637  | -0.64229 | -0.19832 |
| H | 3.17596  | -1.39093 | -0.99976 |

## 4n\_conformer-003

|   |          |          |          |
|---|----------|----------|----------|
| C | -0.25307 | -0.50745 | 0.06205  |
| C | 0.36457  | -1.70033 | 0.41620  |
| C | 1.76947  | -1.51673 | 0.30139  |
| C | 1.99640  | -0.21725 | -0.12474 |
| N | 0.76244  | 0.38018  | -0.25062 |
| H | 0.61675  | 1.30291  | -0.63404 |
| H | -0.14350 | -2.59430 | 0.75183  |
| H | 2.53422  | -2.25104 | 0.51283  |
| C | -1.66447 | -0.13986 | 0.01173  |
| C | -2.08111 | 1.20432  | 0.04223  |
| C | -2.65480 | -1.13833 | -0.06281 |
| C | -3.43415 | 1.53566  | -0.00877 |

|   |          |          |          |
|---|----------|----------|----------|
| H | -1.34621 | 1.99937  | 0.13240  |
| C | -4.00567 | -0.80466 | -0.10028 |
| H | -2.35543 | -2.18113 | -0.10692 |
| C | -4.40533 | 0.53490  | -0.07838 |
| H | -3.72944 | 2.58094  | 0.01675  |
| H | -4.75030 | -1.59381 | -0.15835 |
| H | -5.45929 | 0.79409  | -0.11458 |
| C | 3.48416  | 1.65973  | 0.63709  |
| H | 4.38424  | 2.23681  | 0.39654  |
| H | 2.63602  | 2.35199  | 0.66942  |
| H | 3.60737  | 1.23022  | 1.63804  |
| C | 4.47631  | -0.39598 | -0.45527 |
| H | 4.63638  | -0.88093 | 0.51476  |
| H | 4.34174  | -1.17934 | -1.20823 |
| H | 5.38184  | 0.16781  | -0.70173 |
| C | 3.26479  | 0.54166  | -0.40161 |
| H | 3.16578  | 1.02113  | -1.38737 |

#### 4n\_conformer-004

|   |          |          |          |
|---|----------|----------|----------|
| C | 0.25309  | -0.50733 | 0.06212  |
| C | -0.36457 | -1.70017 | 0.41636  |
| C | -1.76947 | -1.51656 | 0.30152  |
| C | -1.99637 | -0.21710 | -0.12470 |
| N | -0.76240 | 0.38030  | -0.25062 |
| H | -0.61669 | 1.30298  | -0.63418 |
| H | 0.14348  | -2.59412 | 0.75206  |
| H | -2.53423 | -2.25083 | 0.51302  |
| C | 1.66450  | -0.13980 | 0.01173  |
| C | 2.08120  | 1.20437  | 0.04196  |
| C | 2.65479  | -1.13833 | -0.06259 |
| C | 3.43426  | 1.53563  | -0.00909 |
| H | 1.34634  | 1.99947  | 0.13196  |
| C | 4.00568  | -0.80473 | -0.10011 |
| H | 2.35539  | -2.18112 | -0.10650 |
| C | 4.40540  | 0.53482  | -0.07848 |
| H | 3.72959  | 2.58091  | 0.01622  |
| H | 4.75027  | -1.59393 | -0.15801 |
| H | 5.45937  | 0.79396  | -0.11472 |
| C | -4.47612 | -0.39590 | -0.45642 |
| H | -4.63658 | -0.88161 | 0.51317  |
| H | -5.38161 | 0.16796  | -0.70286 |
| H | -4.34110 | -1.17868 | -1.20991 |
| C | -3.48470 | 1.65901  | 0.63807  |
| H | -4.38469 | 2.23626  | 0.39757  |
| H | -3.60840 | 1.22862  | 1.63858  |

|   |          |         |          |
|---|----------|---------|----------|
| H | -2.63659 | 2.35125 | 0.67144  |
| C | -3.26475 | 0.54185 | -0.40149 |
| H | -3.16537 | 1.02216 | -1.38679 |

4n\_conformer-005

|   |          |          |          |
|---|----------|----------|----------|
| C | 0.25010  | 0.50126  | -0.07209 |
| C | -0.37007 | 1.74468  | -0.06979 |
| C | -1.77400 | 1.53378  | -0.13622 |
| C | -1.99855 | 0.16616  | -0.17390 |
| N | -0.76298 | -0.43940 | -0.14390 |
| H | -0.62230 | -1.43788 | -0.09256 |
| H | 0.13845  | 2.69925  | -0.05971 |
| H | -2.53928 | 2.29690  | -0.16333 |
| C | 1.66341  | 0.13888  | -0.03922 |
| C | 2.11534  | -1.12599 | -0.46028 |
| C | 2.62112  | 1.06512  | 0.41735  |
| C | 3.46979  | -1.45289 | -0.41836 |
| H | 1.40931  | -1.85505 | -0.84789 |
| C | 3.97427  | 0.74018  | 0.44598  |
| H | 2.29351  | 2.04009  | 0.76529  |
| C | 4.40849  | -0.52279 | 0.03241  |
| H | 3.79229  | -2.43607 | -0.74975 |
| H | 4.69286  | 1.47267  | 0.80331  |
| H | 5.46378  | -0.77743 | 0.06139  |
| C | -3.47007 | -1.40408 | 1.12676  |
| H | -4.37315 | -2.02308 | 1.07907  |
| H | -2.62233 | -2.06079 | 1.35060  |
| H | -3.57909 | -0.69860 | 1.95855  |
| C | -4.48265 | 0.23682  | -0.51109 |
| H | -4.63305 | 0.98679  | 0.27419  |
| H | -4.36069 | 0.76259  | -1.46369 |
| H | -5.38855 | -0.37526 | -0.56826 |
| C | -3.26636 | -0.64232 | -0.19827 |
| H | -3.17583 | -1.39115 | -0.99951 |

4n\_conformer-006

|   |          |          |          |
|---|----------|----------|----------|
| C | -0.25308 | 0.50736  | -0.06208 |
| C | 0.36457  | 1.70022  | -0.41628 |
| C | 1.76947  | 1.51661  | -0.30146 |
| C | 1.99638  | 0.21715  | 0.12472  |
| N | 0.76241  | -0.38027 | 0.25062  |
| H | 0.61672  | -1.30297 | 0.63412  |
| H | -0.14349 | 2.59418  | -0.75196 |
| H | 2.53423  | 2.25089  | -0.51294 |

|   |          |          |          |
|---|----------|----------|----------|
| C | -1.66449 | 0.13982  | -0.01172 |
| C | -2.65479 | 1.13833  | 0.06263  |
| C | -2.08117 | -1.20435 | -0.04201 |
| C | -4.00567 | 0.80471  | 0.10012  |
| H | -2.35540 | 2.18113  | 0.10658  |
| C | -3.43423 | -1.53564 | 0.00902  |
| H | -1.34630 | -1.99945 | -0.13204 |
| C | -4.40538 | -0.53484 | 0.07844  |
| H | -4.75027 | 1.59390  | 0.15805  |
| H | -3.72954 | -2.58092 | -0.01633 |
| H | -5.45934 | -0.79399 | 0.11466  |
| C | 3.48452  | -1.65921 | -0.63781 |
| H | 3.60812  | -1.22905 | -1.63844 |
| H | 4.38451  | -2.23645 | -0.39730 |
| H | 2.63637  | -2.35141 | -0.67092 |
| C | 4.47618  | 0.39591  | 0.45608  |
| H | 4.34131  | 1.17884  | 1.20944  |
| H | 5.38168  | -0.16794 | 0.70249  |
| H | 4.63650  | 0.88143  | -0.51363 |
| C | 3.26476  | -0.54180 | 0.40151  |
| H | 3.16549  | -1.02188 | 1.38694  |

4n\_conformer-007

|   |          |          |          |
|---|----------|----------|----------|
| C | 0.21052  | 0.64029  | -0.09211 |
| C | -0.29468 | 1.91941  | -0.29158 |
| C | -1.71331 | 1.83513  | -0.27573 |
| C | -2.06021 | 0.51107  | -0.06370 |
| N | -0.88444 | -0.19817 | 0.03317  |
| H | -0.82792 | -1.17785 | 0.26959  |
| H | 0.29816  | 2.80760  | -0.46352 |
| H | -2.41468 | 2.64790  | -0.41185 |
| C | 1.58519  | 0.15409  | -0.03282 |
| C | 1.90103  | -1.20200 | -0.23949 |
| C | 2.64198  | 1.04689  | 0.23061  |
| C | 3.22038  | -1.64746 | -0.17653 |
| H | 1.11519  | -1.91372 | -0.47661 |
| C | 3.95973  | 0.60121  | 0.27987  |
| H | 2.41992  | 2.09408  | 0.41241  |
| C | 4.25851  | -0.75004 | 0.08109  |
| H | 3.43725  | -2.69941 | -0.34036 |
| H | 4.75693  | 1.31026  | 0.48555  |
| H | 5.28634  | -1.09763 | 0.12640  |
| C | -3.64399 | -1.16260 | -1.07923 |
| H | -4.64991 | -1.59102 | -1.00685 |
| H | -3.53966 | -0.68750 | -2.06014 |

|   |          |          |          |
|---|----------|----------|----------|
| H | -2.92466 | -1.98873 | -1.02652 |
| C | -3.60301 | -0.80551 | 1.43262  |
| H | -2.89170 | -1.62642 | 1.58600  |
| H | -3.45909 | -0.07961 | 2.23953  |
| H | -4.61252 | -1.22277 | 1.51772  |
| C | -3.40484 | -0.14752 | 0.05425  |
| H | -4.14641 | 0.65433  | -0.04695 |

4n\_conformer-008

|   |          |          |          |
|---|----------|----------|----------|
| C | -0.21052 | 0.64029  | -0.09209 |
| C | 0.29468  | 1.91942  | -0.29154 |
| C | 1.71331  | 1.83515  | -0.27568 |
| C | 2.06021  | 0.51108  | -0.06366 |
| N | 0.88444  | -0.19817 | 0.03319  |
| H | 0.82792  | -1.17784 | 0.26961  |
| H | -0.29816 | 2.80761  | -0.46348 |
| H | 2.41468  | 2.64792  | -0.41177 |
| C | -1.58519 | 0.15409  | -0.03282 |
| C | -1.90102 | -1.20200 | -0.23951 |
| C | -2.64199 | 1.04689  | 0.23061  |
| C | -3.22037 | -1.64746 | -0.17657 |
| H | -1.11518 | -1.91371 | -0.47663 |
| C | -3.95973 | 0.60120  | 0.27986  |
| H | -2.41993 | 2.09407  | 0.41244  |
| C | -4.25850 | -0.75005 | 0.08106  |
| H | -3.43723 | -2.69941 | -0.34041 |
| H | -4.75694 | 1.31025  | 0.48555  |
| H | -5.28634 | -1.09764 | 0.12636  |
| C | 3.60295  | -0.80566 | 1.43259  |
| H | 4.61247  | -1.22292 | 1.51769  |
| H | 3.45898  | -0.07985 | 2.23957  |
| H | 2.89164  | -1.62660 | 1.58584  |
| C | 3.64404  | -1.16247 | -1.07929 |
| H | 2.92470  | -1.98861 | -1.02670 |
| H | 3.53975  | -0.68727 | -2.06016 |
| H | 4.64995  | -1.59091 | -1.00691 |
| C | 3.40484  | -0.14751 | 0.05429  |
| H | 4.14641  | 0.65435  | -0.04680 |

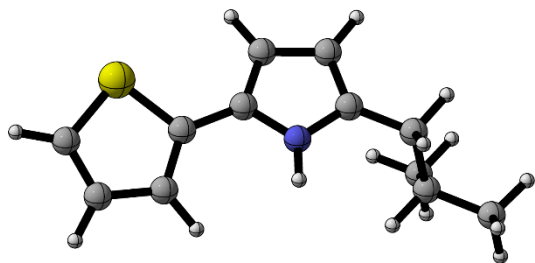

## 4o\_conformer-001

|   |          |          |          |
|---|----------|----------|----------|
| C | 0.69498  | 0.51587  | -0.11014 |
| C | 0.33177  | 1.83203  | 0.15227  |
| C | -1.06204 | 1.95244  | -0.09284 |
| C | -1.53355 | 0.71497  | -0.50206 |
| N | -0.45782 | -0.14347 | -0.50035 |
| H | -0.49165 | -1.10253 | -0.81480 |
| H | 1.00079  | 2.60767  | 0.50075  |
| H | -1.66782 | 2.84129  | 0.02263  |
| C | 1.97007  | -0.15791 | -0.02318 |
| C | 2.24492  | -1.50878 | 0.00690  |
| S | 3.46207  | 0.76697  | 0.05256  |
| C | 3.63876  | -1.80283 | 0.09727  |
| H | 1.47497  | -2.27262 | -0.00970 |
| C | 4.42211  | -0.68351 | 0.14027  |
| H | 4.03702  | -2.81068 | 0.13949  |
| H | 5.49805  | -0.61266 | 0.21996  |
| C | -2.90812 | 0.25163  | -0.86201 |
| H | -2.89399 | -0.23575 | -1.84730 |
| C | -3.53810 | -0.72274 | 0.16220  |
| H | -2.86306 | -1.58560 | 0.26019  |
| C | -4.88823 | -1.23058 | -0.35401 |
| C | -3.68100 | -0.07010 | 1.54056  |
| H | -2.71538 | 0.28230  | 1.91740  |
| H | -4.09639 | -0.77710 | 2.26756  |
| H | -4.35575 | 0.79446  | 1.48883  |
| H | -3.55365 | 1.13307  | -0.95902 |
| H | -4.78357 | -1.72549 | -1.32670 |
| H | -5.33293 | -1.94761 | 0.34540  |
| H | -5.59436 | -0.39891 | -0.47458 |

## 4o\_conformer-002

|   |          |          |          |
|---|----------|----------|----------|
| C | -0.69498 | 0.51586  | -0.11015 |
| C | -0.33176 | 1.83202  | 0.15226  |
| C | 1.06205  | 1.95243  | -0.09285 |
| C | 1.53355  | 0.71496  | -0.50207 |
| N | 0.45782  | -0.14348 | -0.50035 |
| H | 0.49165  | -1.10254 | -0.81480 |
| H | -1.00079 | 2.60767  | 0.50074  |
| H | 1.66782  | 2.84128  | 0.02261  |
| C | -1.97007 | -0.15791 | -0.02319 |
| C | -2.24493 | -1.50878 | 0.00690  |
| S | -3.46207 | 0.76698  | 0.05256  |
| C | -3.63877 | -1.80282 | 0.09728  |



|   |          |          |          |
|---|----------|----------|----------|
| H | -1.47498 | -2.27262 | -0.00970 |
| C | -4.42211 | -0.68350 | 0.14028  |
| H | -4.03703 | -2.81067 | 0.13949  |
| H | -5.49805 | -0.61264 | 0.21997  |
| C | 2.90812  | 0.25161  | -0.86202 |
| H | 3.55364  | 1.13306  | -0.95904 |
| C | 3.53810  | -0.72274 | 0.16221  |
| H | 2.86307  | -1.58560 | 0.26022  |
| C | 3.68101  | -0.07007 | 1.54056  |
| C | 4.88823  | -1.23059 | -0.35399 |
| H | 5.59436  | -0.39892 | -0.47459 |
| H | 5.33294  | -1.94760 | 0.34542  |
| H | 4.78357  | -1.72551 | -1.32668 |
| H | 2.89399  | -0.23578 | -1.84729 |
| H | 4.35576  | 0.79449  | 1.48880  |
| H | 2.71539  | 0.28233  | 1.91739  |
| H | 4.09640  | -0.77706 | 2.26757  |

#### 4o\_conformer-003

|   |          |          |          |
|---|----------|----------|----------|
| C | 0.69349  | 0.48485  | -0.31677 |
| C | 0.31957  | 1.82391  | -0.33587 |
| C | -1.08230 | 1.87754  | -0.55709 |
| C | -1.54824 | 0.57705  | -0.67130 |
| N | -0.45944 | -0.25176 | -0.52565 |
| H | -0.50604 | -1.26033 | -0.51332 |
| H | 0.99393  | 2.66292  | -0.22653 |
| H | -1.69493 | 2.76606  | -0.63183 |
| C | 1.98256  | -0.14410 | -0.14329 |
| C | 2.37135  | -1.43558 | -0.43022 |
| S | 3.32915  | 0.75899  | 0.53377  |
| C | 3.73891  | -1.69958 | -0.11797 |
| H | 1.70945  | -2.17113 | -0.87448 |
| C | 4.39044  | -0.61542 | 0.40011  |
| H | 4.21732  | -2.65846 | -0.28478 |
| H | 5.42281  | -0.53031 | 0.70990  |
| C | -2.92813 | 0.03659  | -0.86565 |
| H | -2.94279 | -0.65649 | -1.71869 |
| C | -3.50785 | -0.69020 | 0.37180  |
| H | -2.82288 | -1.51162 | 0.62914  |
| C | -4.87284 | -1.29858 | 0.03407  |
| C | -3.60180 | 0.24809  | 1.57883  |
| H | -3.98292 | -0.28253 | 2.45867  |
| H | -2.62501 | 0.67360  | 1.83064  |
| H | -4.28476 | 1.08106  | 1.36637  |
| H | -3.58950 | 0.87098  | -1.12926 |

|   |          |          |          |
|---|----------|----------|----------|
| H | -5.59060 | -0.51317 | -0.23575 |
| H | -4.80249 | -1.99343 | -0.81103 |
| H | -5.28283 | -1.84605 | 0.89034  |

4o\_conformer-004

|   |          |          |          |
|---|----------|----------|----------|
| C | -0.69349 | 0.48485  | -0.31677 |
| C | -0.31957 | 1.82391  | -0.33587 |
| C | 1.08230  | 1.87754  | -0.55709 |
| C | 1.54824  | 0.57704  | -0.67130 |
| N | 0.45944  | -0.25176 | -0.52565 |
| H | 0.50604  | -1.26033 | -0.51332 |
| H | -0.99393 | 2.66292  | -0.22654 |
| H | 1.69493  | 2.76606  | -0.63184 |
| C | -1.98256 | -0.14411 | -0.14329 |
| C | -2.37135 | -1.43558 | -0.43022 |
| S | -3.32915 | 0.75899  | 0.53377  |
| C | -3.73891 | -1.69958 | -0.11797 |
| H | -1.70946 | -2.17113 | -0.87448 |
| C | -4.39044 | -0.61542 | 0.40011  |
| H | -4.21732 | -2.65846 | -0.28478 |
| H | -5.42281 | -0.53031 | 0.70990  |
| C | 2.92813  | 0.03659  | -0.86565 |
| H | 3.58950  | 0.87098  | -1.12926 |
| C | 3.50785  | -0.69020 | 0.37181  |
| H | 2.82288  | -1.51162 | 0.62914  |
| C | 3.60180  | 0.24809  | 1.57883  |
| C | 4.87284  | -1.29858 | 0.03407  |
| H | 5.59060  | -0.51318 | -0.23576 |
| H | 5.28283  | -1.84605 | 0.89034  |
| H | 4.80248  | -1.99343 | -0.81103 |
| H | 2.94279  | -0.65649 | -1.71869 |
| H | 4.28477  | 1.08106  | 1.36637  |
| H | 2.62501  | 0.67361  | 1.83064  |
| H | 3.98292  | -0.28252 | 2.45867  |

4o\_conformer-005

|   |          |          |          |
|---|----------|----------|----------|
| C | 0.74411  | 0.81413  | -0.08980 |
| C | 0.27151  | 2.07884  | 0.24184  |
| C | -1.12824 | 2.09254  | 0.00069  |
| C | -1.49555 | 0.84226  | -0.47133 |
| N | -0.35074 | 0.07876  | -0.51135 |
| H | -0.30402 | -0.85731 | -0.88914 |
| H | 0.87454  | 2.88516  | 0.63665  |
| H | -1.80704 | 2.91927  | 0.16295  |

|   |          |          |          |
|---|----------|----------|----------|
| C | 2.08268  | 0.27184  | -0.03444 |
| C | 3.27959  | 0.95473  | -0.01514 |
| S | 2.37273  | -1.46114 | 0.06489  |
| C | 4.41953  | 0.10163  | 0.06986  |
| H | 3.33605  | 2.03540  | -0.08086 |
| C | 4.09748  | -1.22688 | 0.10716  |
| H | 5.44114  | 0.46532  | 0.08698  |
| H | 4.75551  | -2.08350 | 0.15266  |
| C | -2.82722 | 0.28263  | -0.85497 |
| H | -2.77544 | -0.15284 | -1.86303 |
| C | -3.36995 | -0.79034 | 0.11947  |
| H | -2.62562 | -1.59829 | 0.17435  |
| C | -4.67579 | -1.38166 | -0.42135 |
| C | -3.56061 | -0.22107 | 1.52865  |
| H | -4.30427 | 0.58661  | 1.52005  |
| H | -3.91364 | -0.99515 | 2.21937  |
| H | -2.62572 | 0.19029  | 1.92279  |
| H | -3.54506 | 1.11017  | -0.90917 |
| H | -4.53498 | -1.81639 | -1.41793 |
| H | -5.05646 | -2.16748 | 0.24093  |
| H | -5.44888 | -0.60634 | -0.49935 |

4o\_conformer-006

|   |          |          |          |
|---|----------|----------|----------|
| C | -0.74411 | 0.81415  | -0.08978 |
| C | -0.27153 | 2.07886  | 0.24189  |
| C | 1.12822  | 2.09258  | 0.00076  |
| C | 1.49555  | 0.84232  | -0.47128 |
| N | 0.35075  | 0.07880  | -0.51132 |
| H | 0.30405  | -0.85726 | -0.88913 |
| H | -0.87458 | 2.88516  | 0.63671  |
| H | 1.80701  | 2.91932  | 0.16304  |
| C | -2.08267 | 0.27184  | -0.03444 |
| C | -3.27960 | 0.95471  | -0.01516 |
| S | -2.37270 | -1.46114 | 0.06488  |
| C | -4.41952 | 0.10159  | 0.06982  |
| H | -3.33607 | 2.03539  | -0.08089 |
| C | -4.09746 | -1.22691 | 0.10712  |
| H | -5.44114 | 0.46528  | 0.08692  |
| H | -4.75548 | -2.08353 | 0.15261  |
| C | 2.82723  | 0.28272  | -0.85493 |
| H | 3.54508  | 1.11026  | -0.90902 |
| C | 3.36993  | -0.79036 | 0.11941  |
| H | 2.62561  | -1.59833 | 0.17416  |
| C | 3.56053  | -0.22125 | 1.52867  |
| C | 4.67580  | -1.38160 | -0.42142 |

|   |         |          |          |
|---|---------|----------|----------|
| H | 4.53505 | -1.81622 | -1.41806 |
| H | 5.05645 | -2.16750 | 0.24079  |
| H | 5.44889 | -0.60627 | -0.49929 |
| H | 2.77549 | -0.15265 | -1.86304 |
| H | 2.62561 | 0.19004  | 1.92282  |
| H | 3.91354 | -0.99541 | 2.21931  |
| H | 4.30417 | 0.58645  | 1.52019  |

4o\_conformer-007

|   |          |          |          |
|---|----------|----------|----------|
| C | -0.72470 | 0.74989  | -0.21254 |
| C | -0.24361 | 2.05094  | -0.30880 |
| C | 1.14853  | 1.97625  | -0.57948 |
| C | 1.50198  | 0.63780  | -0.65032 |
| N | 0.35434  | -0.08968 | -0.43006 |
| H | 0.32156  | -1.09755 | -0.36490 |
| H | -0.84504 | 2.94543  | -0.22026 |
| H | 1.82873  | 2.80621  | -0.71762 |
| C | -2.06120 | 0.26461  | 0.04630  |
| C | -3.11401 | 0.93739  | 0.62817  |
| S | -2.56095 | -1.35859 | -0.41458 |
| C | -4.30774 | 0.16145  | 0.71216  |
| H | -3.02381 | 1.95127  | 1.00136  |
| C | -4.16747 | -1.10088 | 0.20535  |
| H | -5.23137 | 0.52675  | 1.14773  |
| H | -4.89662 | -1.89764 | 0.15675  |
| C | 2.82493  | -0.02310 | -0.86699 |
| H | 3.54049  | 0.74137  | -1.19369 |
| C | 3.39312  | -0.73863 | 0.38240  |
| H | 2.65525  | -1.48854 | 0.70379  |
| C | 3.61086  | 0.24220  | 1.53857  |
| C | 4.69001  | -1.47207 | 0.02519  |
| H | 5.45729  | -0.76155 | -0.30837 |
| H | 5.08863  | -2.01195 | 0.89160  |
| H | 4.52996  | -2.19650 | -0.78201 |
| H | 2.75030  | -0.75269 | -1.68576 |
| H | 4.34944  | 1.00575  | 1.26125  |
| H | 2.68246  | 0.75750  | 1.80529  |
| H | 3.98334  | -0.27775 | 2.42841  |

4o\_conformer-008

|   |          |         |          |
|---|----------|---------|----------|
| C | 0.72470  | 0.74989 | -0.21253 |
| C | 0.24361  | 2.05095 | -0.30879 |
| C | -1.14853 | 1.97626 | -0.57948 |
| C | -1.50198 | 0.63781 | -0.65032 |

|   |          |          |          |
|---|----------|----------|----------|
| N | -0.35434 | -0.08968 | -0.43006 |
| H | -0.32156 | -1.09755 | -0.36490 |
| H | 0.84504  | 2.94543  | -0.22025 |
| H | -1.82873 | 2.80622  | -0.71761 |
| C | 2.06120  | 0.26461  | 0.04630  |
| C | 3.11401  | 0.93739  | 0.62817  |
| S | 2.56095  | -1.35859 | -0.41458 |
| C | 4.30773  | 0.16145  | 0.71216  |
| H | 3.02381  | 1.95127  | 1.00136  |
| C | 4.16747  | -1.10088 | 0.20534  |
| H | 5.23137  | 0.52675  | 1.14773  |
| H | 4.89661  | -1.89764 | 0.15675  |
| C | -2.82493 | -0.02310 | -0.86699 |
| H | -2.75031 | -0.75268 | -1.68576 |
| C | -3.39312 | -0.73863 | 0.38240  |
| H | -2.65525 | -1.48855 | 0.70378  |
| C | -4.69001 | -1.47207 | 0.02519  |
| C | -3.61085 | 0.24219  | 1.53857  |
| H | -2.68246 | 0.75750  | 1.80529  |
| H | -4.34944 | 1.00575  | 1.26126  |
| H | -3.98334 | -0.27776 | 2.42841  |
| H | -3.54050 | 0.74137  | -1.19368 |
| H | -5.45729 | -0.76154 | -0.30836 |
| H | -4.52997 | -2.19650 | -0.78201 |
| H | -5.08862 | -2.01195 | 0.89159  |

#### 4o\_conformer-009

|   |          |          |          |
|---|----------|----------|----------|
| C | 0.68432  | -0.55059 | 0.04225  |
| C | 0.31050  | -1.81728 | -0.39425 |
| C | -1.08378 | -1.95875 | -0.16850 |
| C | -1.54702 | -0.78163 | 0.40071  |
| N | -0.46378 | 0.05812  | 0.51691  |
| H | -0.49631 | 0.97250  | 0.94402  |
| H | 0.97521  | -2.54705 | -0.83739 |
| H | -1.69400 | -2.82211 | -0.39840 |
| C | 1.96376  | 0.11996  | 0.04890  |
| C | 2.24609  | 1.45985  | 0.21095  |
| S | 3.45029  | -0.79234 | -0.16326 |
| C | 3.64131  | 1.75663  | 0.15909  |
| H | 1.48015  | 2.21708  | 0.33927  |
| C | 4.41834  | 0.65096  | -0.04573 |
| H | 4.04505  | 2.75813  | 0.25997  |
| H | 5.49365  | 0.58657  | -0.13816 |
| C | -2.92622 | -0.36086 | 0.79757  |
| H | -2.87133 | 0.36289  | 1.62317  |

|   |          |          |          |
|---|----------|----------|----------|
| C | -3.76194 | 0.25795  | -0.34979 |
| H | -3.80980 | -0.48877 | -1.15489 |
| C | -3.11018 | 1.52587  | -0.91131 |
| C | -5.18832 | 0.54014  | 0.13454  |
| H | -5.18354 | 1.27857  | 0.94674  |
| H | -5.80748 | 0.94008  | -0.67650 |
| H | -5.66938 | -0.36998 | 0.51162  |
| H | -3.46093 | -1.23561 | 1.18595  |
| H | -3.01767 | 2.29262  | -0.13048 |
| H | -2.10884 | 1.32425  | -1.30507 |
| H | -3.71414 | 1.94784  | -1.72259 |

#### 4o\_conformer-010

|   |          |          |          |
|---|----------|----------|----------|
| C | -0.68431 | -0.55070 | 0.04227  |
| C | -0.31057 | -1.81746 | -0.39409 |
| C | 1.08372  | -1.95896 | -0.16839 |
| C | 1.54704  | -0.78179 | 0.40066  |
| N | 0.46384  | 0.05802  | 0.51681  |
| H | 0.49644  | 0.97247  | 0.94374  |
| H | -0.97533 | -2.54726 | -0.83710 |
| H | 1.69389  | -2.82238 | -0.39819 |
| C | -1.96371 | 0.11992  | 0.04892  |
| C | -2.24594 | 1.45982  | 0.21108  |
| S | -3.45029 | -0.79226 | -0.16339 |
| C | -3.64114 | 1.75671  | 0.15919  |
| H | -1.47995 | 2.21697  | 0.33952  |
| C | -4.41824 | 0.65110  | -0.04576 |
| H | -4.04482 | 2.75822  | 0.26014  |
| H | -5.49356 | 0.58681  | -0.13824 |
| C | 2.92627  | -0.36105 | 0.79742  |
| H | 3.46106  | -1.23589 | 1.18548  |
| C | 3.76182  | 0.25810  | -0.34988 |
| H | 3.80960  | -0.48839 | -1.15520 |
| C | 5.18825  | 0.54021  | 0.13435  |
| C | 3.10995  | 1.52616  | -0.91097 |
| H | 3.71384  | 1.94841  | -1.72216 |
| H | 2.10860  | 1.32462  | -1.30474 |
| H | 3.01745  | 2.29267  | -0.12989 |
| H | 2.87148  | 0.36248  | 1.62323  |
| H | 5.18354  | 1.27843  | 0.94675  |
| H | 5.66939  | -0.36999 | 0.51113  |
| H | 5.80730  | 0.94037  | -0.67666 |

#### 4o\_conformer-011

|   |          |          |          |
|---|----------|----------|----------|
| C | -0.68351 | 0.54642  | -0.22615 |
| C | -0.28663 | 1.85890  | 0.00776  |
| C | 1.11489  | 1.93151  | -0.20535 |
| C | 1.55940  | 0.66735  | -0.56412 |
| N | 0.45686  | -0.15483 | -0.57504 |
| H | 0.49009  | -1.14949 | -0.74673 |
| H | -0.94767 | 2.67382  | 0.27181  |
| H | 1.74010  | 2.81002  | -0.11597 |
| C | -1.98276 | -0.08303 | -0.17569 |
| C | -2.39210 | -1.28577 | -0.71146 |
| S | -3.31394 | 0.68803  | 0.67314  |
| C | -3.76328 | -1.58576 | -0.45189 |
| H | -1.74163 | -1.92713 | -1.29626 |
| C | -4.39712 | -0.61624 | 0.27374  |
| H | -4.25703 | -2.48494 | -0.80385 |
| H | -5.42775 | -0.57831 | 0.59839  |
| C | 2.93728  | 0.15451  | -0.83973 |
| H | 3.49132  | 0.91468  | -1.40340 |
| C | 3.74804  | -0.20553 | 0.42890  |
| H | 3.80485  | 0.70248  | 1.04564  |
| C | 5.17229  | -0.61845 | 0.04240  |
| C | 3.06019  | -1.29969 | 1.25176  |
| H | 2.95806  | -2.22121 | 0.66309  |
| H | 3.64422  | -1.53963 | 2.14748  |
| H | 2.05959  | -0.99264 | 1.57309  |
| H | 2.88011  | -0.73257 | -1.48603 |
| H | 5.15893  | -1.52221 | -0.58051 |
| H | 5.67718  | 0.17228  | -0.52487 |
| H | 5.77450  | -0.83512 | 0.93205  |

4o\_conformer-012

|   |          |          |          |
|---|----------|----------|----------|
| C | 0.68351  | 0.54648  | -0.22600 |
| C | 0.28671  | 1.85896  | 0.00806  |
| C | -1.11481 | 1.93168  | -0.20502 |
| C | -1.55940 | 0.66759  | -0.56392 |
| N | -0.45691 | -0.15466 | -0.57494 |
| H | -0.49020 | -1.14928 | -0.74681 |
| H | 0.94780  | 2.67382  | 0.27222  |
| H | -1.73996 | 2.81022  | -0.11553 |
| C | 1.98271  | -0.08305 | -0.17560 |
| C | 2.39187  | -1.28596 | -0.71116 |
| S | 3.31411  | 0.68811  | 0.67280  |
| C | 3.76307  | -1.58599 | -0.45177 |
| H | 1.74125  | -1.92743 | -1.29567 |
| C | 4.39712  | -0.61635 | 0.27353  |

|   |          |          |          |
|---|----------|----------|----------|
| H | 4.25669  | -2.48530 | -0.80358 |
| H | 5.42780  | -0.57843 | 0.59801  |
| C | -2.93731 | 0.15488  | -0.83961 |
| H | -2.88022 | -0.73194 | -1.48630 |
| C | -3.74799 | -0.20568 | 0.42892  |
| H | -3.80468 | 0.70206  | 1.04608  |
| C | -3.06016 | -1.30027 | 1.25123  |
| C | -5.17230 | -0.61831 | 0.04236  |
| H | -5.15906 | -1.52178 | -0.58098 |
| H | -5.67718 | 0.17272  | -0.52450 |
| H | -5.77445 | -0.83536 | 0.93196  |
| H | -3.49138 | 0.91530  | -1.40292 |
| H | -2.05951 | -0.99346 | 1.57262  |
| H | -3.64415 | -1.54057 | 2.14688  |
| H | -2.95817 | -2.22153 | 0.66213  |

#### 4o\_conformer-013

|   |          |          |          |
|---|----------|----------|----------|
| C | -0.68434 | 0.55086  | -0.04213 |
| C | -0.31066 | 1.81761  | 0.39429  |
| C | 1.08364  | 1.95915  | 0.16867  |
| C | 1.54703  | 0.78201  | -0.40038 |
| N | 0.46385  | -0.05782 | -0.51661 |
| H | 0.49645  | -0.97218 | -0.94375 |
| H | -0.97544 | 2.54737  | 0.83734  |
| H | 1.69379  | 2.82257  | 0.39855  |
| C | -1.96368 | -0.11986 | -0.04881 |
| C | -2.24571 | -1.45983 | -0.21073 |
| S | -3.45040 | 0.79219  | 0.16304  |
| C | -3.64088 | -1.75688 | -0.15902 |
| H | -1.47958 | -2.21690 | -0.33883 |
| C | -4.41815 | -0.65133 | 0.04557  |
| H | -4.04441 | -2.75847 | -0.25982 |
| H | -5.49349 | -0.58714 | 0.13786  |
| C | 2.92626  | 0.36136  | -0.79722 |
| H | 3.46107  | 1.23635  | -1.18491 |
| C | 3.76175  | -0.25829 | 0.34985  |
| H | 3.80951  | 0.48786  | 1.15549  |
| C | 5.18821  | -0.54020 | -0.13445 |
| C | 3.10989  | -1.52660 | 0.91038  |
| H | 3.71376  | -1.94917 | 1.72142  |
| H | 2.10852  | -1.32527 | 1.30418  |
| H | 3.01746  | -2.29279 | 0.12898  |
| H | 2.87151  | -0.36184 | -1.62332 |
| H | 5.18352  | -1.27805 | -0.94718 |
| H | 5.66937  | 0.37017  | -0.51080 |



|   |         |          |         |
|---|---------|----------|---------|
| H | 5.80722 | -0.94073 | 0.67641 |
|---|---------|----------|---------|

4o\_conformer-014

|   |          |          |          |
|---|----------|----------|----------|
| C | 0.68438  | 0.55080  | -0.04235 |
| C | 0.31065  | 1.81760  | 0.39387  |
| C | -1.08366 | 1.95904  | 0.16827  |
| C | -1.54701 | 0.78178  | -0.40057 |
| N | -0.46379 | -0.05801 | -0.51671 |
| H | -0.49638 | -0.97247 | -0.94362 |
| H | 0.97541  | 2.54748  | 0.83676  |
| H | -1.69384 | 2.82248  | 0.39802  |
| C | 1.96375  | -0.11985 | -0.04896 |
| C | 2.24589  | -1.45976 | -0.21124 |
| S | 3.45038  | 0.79219  | 0.16356  |
| C | 3.64106  | -1.75676 | -0.15929 |
| H | 1.47985  | -2.21682 | -0.33983 |
| C | 4.41823  | -0.65123 | 0.04584  |
| H | 4.04467  | -2.75829 | -0.26032 |
| H | 5.49355  | -0.58702 | 0.13840  |
| C | -2.92623 | 0.36101  | -0.79733 |
| H | -2.87147 | -0.36252 | -1.62315 |
| C | -3.76182 | -0.25815 | 0.34994  |
| H | -3.80946 | 0.48825  | 1.15535  |
| C | -3.11019 | -1.52642 | 0.91085  |
| C | -5.18832 | -0.53997 | -0.13428 |
| H | -5.66934 | 0.37036  | -0.51090 |
| H | -5.18375 | -1.27807 | -0.94679 |
| H | -5.80740 | -0.94017 | 0.67670  |
| H | -3.46097 | 1.23587  | -1.18539 |
| H | -3.71411 | -1.94861 | 1.72204  |
| H | -3.01792 | -2.29286 | 0.12969  |
| H | -2.10876 | -1.32516 | 1.30456  |

4o\_conformer-015

|   |          |          |          |
|---|----------|----------|----------|
| C | 0.68356  | -0.54623 | -0.22653 |
| C | 0.28646  | -1.85873 | 0.00686  |
| C | -1.11507 | -1.93102 | -0.20633 |
| C | -1.55936 | -0.66665 | -0.56463 |
| N | -0.45667 | 0.15535  | -0.57520 |
| H | -0.48974 | 1.15013  | -0.74626 |
| H | 0.94738  | -2.67388 | 0.27053  |
| H | -1.74041 | -2.80947 | -0.11734 |
| C | 1.98292  | 0.08295  | -0.17589 |
| C | 2.39278  | 1.28522  | -0.71234 |

|   |          |          |          |
|---|----------|----------|----------|
| S | 3.31351  | -0.68778 | 0.67416  |
| C | 3.76391  | 1.58508  | -0.45234 |
| H | 1.74273  | 1.92620  | -1.29801 |
| C | 4.39720  | 0.61594  | 0.27429  |
| H | 4.25805  | 2.48388  | -0.80474 |
| H | 5.42767  | 0.57799  | 0.59940  |
| C | -2.93715 | -0.15342 | -0.84001 |
| H | -3.49109 | -0.91287 | -1.40477 |
| C | -3.74827 | 0.20510  | 0.42882  |
| H | -3.80538 | -0.70370 | 1.04438  |
| C | -5.17234 | 0.61869  | 0.04240  |
| C | -3.06054 | 1.29810  | 1.25330  |
| H | -3.64477 | 1.53690  | 2.14919  |
| H | -2.06004 | 0.99056  | 1.57445  |
| H | -2.95819 | 2.22039  | 0.66587  |
| H | -2.87973 | 0.73443  | -1.48522 |
| H | -5.15866 | 1.52323  | -0.57936 |
| H | -5.67715 | -0.17126 | -0.52603 |
| H | -5.77480 | 0.83432  | 0.93213  |

4o\_conformer-016

|   |          |          |          |
|---|----------|----------|----------|
| C | -0.68354 | -0.54634 | -0.22641 |
| C | -0.28653 | -1.85885 | 0.00708  |
| C | 1.11500  | -1.93125 | -0.20610 |
| C | 1.55938  | -0.66693 | -0.56449 |
| N | 0.45674  | 0.15514  | -0.57512 |
| H | 0.48986  | 1.14989  | -0.74632 |
| H | -0.94750 | -2.67394 | 0.27081  |
| H | 1.74028  | -2.80974 | -0.11705 |
| C | -1.98286 | 0.08293  | -0.17586 |
| C | -2.39258 | 1.28524  | -0.71230 |
| S | -3.31358 | -0.68772 | 0.67407  |
| C | -3.76371 | 1.58521  | -0.45241 |
| H | -1.74243 | 1.92620  | -1.29790 |
| C | -4.39713 | 0.61609  | 0.27415  |
| H | -4.25775 | 2.48405  | -0.80481 |
| H | -5.42763 | 0.57822  | 0.59919  |
| C | 2.93720  | -0.15382 | -0.83988 |
| H | 2.87990  | 0.73373  | -1.48552 |
| C | 3.74816  | 0.20530  | 0.42889  |
| H | 3.80517  | -0.70321 | 1.04489  |
| C | 3.06034  | 1.29871  | 1.25276  |
| C | 5.17229  | 0.61868  | 0.04246  |
| H | 5.15870  | 1.52293  | -0.57973 |
| H | 5.77463  | 0.83473  | 0.93217  |

|   |         |          |          |
|---|---------|----------|----------|
| H | 5.67717 | -0.17154 | -0.52552 |
| H | 3.49121 | -0.91355 | -1.40419 |
| H | 2.95808 | 2.22071  | 0.66487  |
| H | 2.05980 | 0.99133  | 1.57396  |
| H | 3.64447 | 1.53793  | 2.14860  |

#### 4o\_conformer-017

|   |          |          |          |
|---|----------|----------|----------|
| C | 0.72865  | 0.84606  | -0.00375 |
| C | 0.25001  | 2.06347  | -0.47636 |
| C | -1.15000 | 2.09657  | -0.24316 |
| C | -1.51313 | 0.90300  | 0.36299  |
| N | -0.36387 | 0.15792  | 0.49413  |
| H | -0.31916 | -0.73698 | 0.96119  |
| H | 0.85142  | 2.82640  | -0.95179 |
| H | -1.83065 | 2.89900  | -0.49553 |
| C | 2.06992  | 0.30805  | 0.00871  |
| C | 3.26432  | 0.99038  | -0.07421 |
| S | 2.36713  | -1.42459 | 0.09462  |
| C | 4.40810  | 0.13815  | -0.06020 |
| H | 3.31621  | 2.07222  | -0.12252 |
| C | 4.09140  | -1.18830 | 0.04070  |
| H | 5.42847  | 0.50265  | -0.10796 |
| H | 4.75302  | -2.04185 | 0.09145  |
| C | -2.85100 | 0.38305  | 0.78277  |
| H | -3.45899 | 1.22548  | 1.13274  |
| C | -3.62978 | -0.35733 | -0.33214 |
| H | -3.73950 | 0.34381  | -1.17146 |
| C | -5.02782 | -0.73599 | 0.16875  |
| C | -2.87253 | -1.59098 | -0.83484 |
| H | -3.43797 | -2.10084 | -1.62311 |
| H | -1.89148 | -1.32468 | -1.24096 |
| H | -2.71615 | -2.30899 | -0.01860 |
| H | -2.73500 | -0.29511 | 1.64022  |
| H | -4.96152 | -1.43154 | 1.01537  |
| H | -5.58493 | 0.14706  | 0.50310  |
| H | -5.60961 | -1.22545 | -0.62058 |

#### 4o\_conformer-018

|   |          |          |          |
|---|----------|----------|----------|
| C | -0.72865 | 0.84607  | -0.00375 |
| C | -0.25001 | 2.06348  | -0.47633 |
| C | 1.15000  | 2.09658  | -0.24313 |
| C | 1.51313  | 0.90300  | 0.36299  |
| N | 0.36387  | 0.15792  | 0.49413  |
| H | 0.31916  | -0.73700 | 0.96115  |

|   |          |          |          |
|---|----------|----------|----------|
| H | -0.85142 | 2.82642  | -0.95174 |
| H | 1.83065  | 2.89902  | -0.49549 |
| C | -2.06991 | 0.30805  | 0.00871  |
| C | -3.26432 | 0.99038  | -0.07425 |
| S | -2.36713 | -1.42459 | 0.09466  |
| C | -4.40810 | 0.13815  | -0.06024 |
| H | -3.31621 | 2.07221  | -0.12259 |
| C | -4.09140 | -1.18830 | 0.04069  |
| H | -5.42847 | 0.50265  | -0.10803 |
| H | -4.75302 | -2.04185 | 0.09145  |
| C | 2.85100  | 0.38305  | 0.78277  |
| H | 2.73502  | -0.29510 | 1.64022  |
| C | 3.62977  | -0.35734 | -0.33215 |
| H | 3.73948  | 0.34380  | -1.17148 |
| C | 2.87253  | -1.59099 | -0.83484 |
| C | 5.02782  | -0.73599 | 0.16872  |
| H | 5.58493  | 0.14706  | 0.50306  |
| H | 5.60961  | -1.22546 | -0.62061 |
| H | 4.96154  | -1.43153 | 1.01535  |
| H | 3.45900  | 1.22549  | 1.13272  |
| H | 1.89146  | -1.32470 | -1.24094 |
| H | 3.43795  | -2.10085 | -1.62311 |
| H | 2.71616  | -2.30900 | -0.01859 |

#### 4o\_conformer-019

|   |          |          |          |
|---|----------|----------|----------|
| C | 0.71143  | 0.78705  | -0.08358 |
| C | 0.21527  | 2.07993  | 0.04842  |
| C | -1.17575 | 2.03911  | -0.23135 |
| C | -1.51515 | 0.72832  | -0.53262 |
| N | -0.35920 | -0.01243 | -0.44351 |
| H | -0.32039 | -1.01680 | -0.54809 |
| H | 0.80805  | 2.95266  | 0.28669  |
| H | -1.86295 | 2.87494  | -0.22617 |
| C | 2.05422  | 0.27913  | 0.08111  |
| C | 3.10244  | 0.84891  | 0.77115  |
| S | 2.56938  | -1.22952 | -0.66445 |
| C | 4.30487  | 0.08404  | 0.71172  |
| H | 3.00311  | 1.77851  | 1.32013  |
| C | 4.17593  | -1.06878 | -0.01234 |
| H | 5.22647  | 0.37606  | 1.20334  |
| H | 4.91336  | -1.83567 | -0.20443 |
| C | -2.83889 | 0.10405  | -0.84108 |
| H | -2.68941 | -0.80253 | -1.44426 |
| C | -3.67888 | -0.26154 | 0.40696  |
| H | -3.82724 | 0.66446  | 0.98020  |

|   |          |          |          |
|---|----------|----------|----------|
| C | -2.95443 | -1.26883 | 1.30590  |
| C | -5.05160 | -0.79148 | -0.02109 |
| H | -4.94647 | -1.71589 | -0.60364 |
| H | -5.67653 | -1.01567 | 0.85085  |
| H | -5.58492 | -0.06249 | -0.64246 |
| H | -3.41979 | 0.79747  | -1.46094 |
| H | -2.76098 | -2.20401 | 0.76346  |
| H | -1.99384 | -0.87765 | 1.65659  |
| H | -3.56085 | -1.51351 | 2.18531  |

#### 4o\_conformer-020

|   |          |          |          |
|---|----------|----------|----------|
| C | -0.71143 | 0.78706  | -0.08357 |
| C | -0.21527 | 2.07994  | 0.04844  |
| C | 1.17575  | 2.03912  | -0.23133 |
| C | 1.51515  | 0.72834  | -0.53261 |
| N | 0.35920  | -0.01242 | -0.44350 |
| H | 0.32039  | -1.01678 | -0.54810 |
| H | -0.80806 | 2.95266  | 0.28671  |
| H | 1.86295  | 2.87495  | -0.22614 |
| C | -2.05422 | 0.27913  | 0.08111  |
| C | -3.10245 | 0.84892  | 0.77113  |
| S | -2.56936 | -1.22953 | -0.66444 |
| C | -4.30488 | 0.08404  | 0.71169  |
| H | -3.00314 | 1.77852  | 1.32009  |
| C | -4.17592 | -1.06879 | -0.01234 |
| H | -5.22648 | 0.37606  | 1.20330  |
| H | -4.91335 | -1.83569 | -0.20444 |
| C | 2.83890  | 0.10407  | -0.84108 |
| H | 3.41979  | 0.79751  | -1.46090 |
| C | 3.67887  | -0.26155 | 0.40696  |
| H | 3.82723  | 0.66443  | 0.98024  |
| C | 5.05160  | -0.79147 | -0.02109 |
| C | 2.95442  | -1.26888 | 1.30586  |
| H | 3.56083  | -1.51358 | 2.18527  |
| H | 1.99382  | -0.87771 | 1.65656  |
| H | 2.76098  | -2.20403 | 0.76340  |
| H | 2.68942  | -0.80248 | -1.44428 |
| H | 4.94647  | -1.71587 | -0.60368 |
| H | 5.58492  | -0.06246 | -0.64243 |
| H | 5.67652  | -1.01569 | 0.85085  |

#### 4o\_conformer-021

|   |         |         |         |
|---|---------|---------|---------|
| C | 0.72864 | 0.84606 | 0.00365 |
| C | 0.25000 | 2.06357 | 0.47600 |

|   |          |          |          |
|---|----------|----------|----------|
| C | -1.14999 | 2.09663  | 0.24278  |
| C | -1.51312 | 0.90294  | -0.36313 |
| N | -0.36386 | 0.15785  | -0.49415 |
| H | -0.31920 | -0.73730 | -0.96074 |
| H | 0.85141  | 2.82661  | 0.95125  |
| H | -1.83064 | 2.89911  | 0.49498  |
| C | 2.06990  | 0.30805  | -0.00867 |
| C | 3.26429  | 0.99035  | 0.07475  |
| S | 2.36714  | -1.42456 | -0.09510 |
| C | 4.40807  | 0.13813  | 0.06074  |
| H | 3.31618  | 2.07216  | 0.12347  |
| C | 4.09140  | -1.18829 | -0.04065 |
| H | 5.42842  | 0.50262  | 0.10889  |
| H | 4.75303  | -2.04183 | -0.09150 |
| C | -2.85101 | 0.38293  | -0.78279 |
| H | -2.73508 | -0.29534 | -1.64016 |
| C | -3.62976 | -0.35729 | 0.33226  |
| H | -3.73948 | 0.34398  | 1.17147  |
| C | -2.87249 | -1.59084 | 0.83516  |
| C | -5.02781 | -0.73605 | -0.16855 |
| H | -5.60956 | -1.22542 | 0.62087  |
| H | -5.58494 | 0.14694  | -0.50301 |
| H | -4.96151 | -1.43172 | -1.01507 |
| H | -3.45901 | 1.22533  | -1.13284 |
| H | -2.71614 | -2.30901 | 0.01904  |
| H | -1.89143 | -1.32447 | 1.24120  |
| H | -3.43791 | -2.10055 | 1.62353  |

4o\_conformer-022

|   |          |          |          |
|---|----------|----------|----------|
| C | -0.72861 | 0.84616  | 0.00368  |
| C | -0.25005 | 2.06373  | 0.47596  |
| C | 1.14994  | 2.09687  | 0.24277  |
| C | 1.51316  | 0.90316  | -0.36305 |
| N | 0.36395  | 0.15799  | -0.49407 |
| H | 0.31938  | -0.73723 | -0.96051 |
| H | -0.85153 | 2.82679  | 0.95112  |
| H | 1.83054  | 2.89941  | 0.49491  |
| C | -2.06983 | 0.30806  | -0.00866 |
| C | -3.26427 | 0.99029  | 0.07470  |
| S | -2.36695 | -1.42457 | -0.09505 |
| C | -4.40799 | 0.13800  | 0.06068  |
| H | -3.31623 | 2.07210  | 0.12338  |
| C | -4.09123 | -1.18841 | -0.04066 |
| H | -5.42837 | 0.50241  | 0.10878  |
| H | -4.75280 | -2.04199 | -0.09150 |

|   |         |          |          |
|---|---------|----------|----------|
| C | 2.85110 | 0.38320  | -0.78260 |
| H | 3.45922 | 1.22571  | -1.13217 |
| C | 3.62953 | -0.35751 | 0.33233  |
| H | 3.73907 | 0.34341  | 1.17186  |
| C | 5.02768 | -0.73615 | -0.16828 |
| C | 2.87209 | -1.59124 | 0.83454  |
| H | 2.71580 | -2.30902 | 0.01807  |
| H | 1.89098 | -1.32499 | 1.24056  |
| H | 3.43733 | -2.10136 | 1.62277  |
| H | 2.73533 | -0.29472 | -1.64027 |
| H | 5.60923 | -1.22585 | 0.62108  |
| H | 4.96155 | -1.43148 | -1.01510 |
| H | 5.58494 | 0.14694  | -0.50226 |

4o\_conformer-023

|   |          |          |          |
|---|----------|----------|----------|
| C | -0.71152 | 0.78722  | -0.08336 |
| C | -0.21553 | 2.08015  | 0.04883  |
| C | 1.17552  | 2.03952  | -0.23074 |
| C | 1.51513  | 0.72879  | -0.53208 |
| N | 0.35924  | -0.01210 | -0.44320 |
| H | 0.32055  | -1.01646 | -0.54794 |
| H | -0.80843 | 2.95279  | 0.28711  |
| H | 1.86262  | 2.87543  | -0.22542 |
| C | -2.05428 | 0.27915  | 0.08113  |
| C | -3.10273 | 0.84895  | 0.77079  |
| S | -2.56908 | -1.22971 | -0.66427 |
| C | -4.30506 | 0.08393  | 0.71121  |
| H | -3.00366 | 1.77867  | 1.31960  |
| C | -4.17581 | -1.06903 | -0.01257 |
| H | -5.22681 | 0.37594  | 1.20255  |
| H | -4.91310 | -1.83605 | -0.20469 |
| C | 2.83897  | 0.10480  | -0.84077 |
| H | 3.41997  | 0.79878  | -1.45990 |
| C | 3.67876  | -0.26189 | 0.40710  |
| H | 3.82663  | 0.66350  | 0.98145  |
| C | 5.05179  | -0.79083 | -0.02121 |
| C | 2.95447  | -1.27053 | 1.30467  |
| H | 2.76165  | -2.20517 | 0.76111  |
| H | 3.56071  | -1.51592 | 2.18400  |
| H | 1.99359  | -0.88019 | 1.65550  |
| H | 2.68966  | -0.80124 | -1.44477 |
| H | 4.94715  | -1.71458 | -0.60490 |
| H | 5.58503  | -0.06091 | -0.64155 |
| H | 5.67655  | -1.01585 | 0.85064  |

## 4o\_conformer-024

|   |          |          |          |
|---|----------|----------|----------|
| C | 0.71148  | 0.78721  | -0.08345 |
| C | 0.21543  | 2.08012  | 0.04872  |
| C | -1.17562 | 2.03943  | -0.23091 |
| C | -1.51515 | 0.72870  | -0.53228 |
| N | -0.35924 | -0.01215 | -0.44336 |
| H | -0.32055 | -1.01652 | -0.54797 |
| H | 0.80830  | 2.95278  | 0.28701  |
| H | -1.86276 | 2.87530  | -0.22559 |
| C | 2.05424  | 0.27917  | 0.08109  |
| C | 3.10265  | 0.84895  | 0.77084  |
| S | 2.56908  | -1.22968 | -0.66429 |
| C | 4.30498  | 0.08392  | 0.71133  |
| H | 3.00353  | 1.77865  | 1.31968  |
| C | 4.17577  | -1.06902 | -0.01248 |
| H | 5.22670  | 0.37592  | 1.20274  |
| H | 4.91308  | -1.83604 | -0.20457 |
| C | -2.83894 | 0.10458  | -0.84086 |
| H | -2.68953 | -0.80162 | -1.44461 |
| C | -3.67876 | -0.26179 | 0.40705  |
| H | -3.82692 | 0.66381  | 0.98099  |
| C | -2.95431 | -1.26985 | 1.30512  |
| C | -5.05162 | -0.79124 | -0.02117 |
| H | -4.94669 | -1.71522 | -0.60445 |
| H | -5.67642 | -1.01604 | 0.85071  |
| H | -5.58497 | -0.06172 | -0.64190 |
| H | -3.41991 | 0.79839  | -1.46021 |
| H | -2.76111 | -2.20465 | 0.76196  |
| H | -1.99361 | -0.87908 | 1.65595  |
| H | -3.56062 | -1.51509 | 2.18445  |

## 4o\_conformer-025

|   |          |          |          |
|---|----------|----------|----------|
| C | -0.56301 | -0.52177 | -0.13550 |
| C | -0.11479 | -1.78954 | 0.21938  |
| C | 1.26907  | -1.86042 | -0.08918 |
| C | 1.65270  | -0.64028 | -0.62650 |
| N | 0.53060  | 0.15670  | -0.64289 |
| H | 0.49891  | 1.08734  | -1.03307 |
| H | -0.72276 | -2.56549 | 0.66544  |
| H | 1.92626  | -2.70568 | 0.06512  |
| C | -1.86642 | 0.09363  | -0.03892 |
| C | -2.20968 | 1.42700  | -0.11361 |
| S | -3.30179 | -0.89048 | 0.20184  |
| C | -3.61055 | 1.66141  | 0.02769  |



|   |          |          |          |
|---|----------|----------|----------|
| H | -1.48233 | 2.22154  | -0.24069 |
| C | -4.33085 | 0.51471  | 0.21350  |
| H | -4.05848 | 2.64877  | 0.00222  |
| H | -5.39613 | 0.40030  | 0.35875  |
| C | 2.98524  | -0.14639 | -1.09505 |
| H | 2.85045  | 0.49445  | -1.97688 |
| C | 3.80716  | 0.63639  | -0.03649 |
| H | 4.74292  | 0.92284  | -0.53679 |
| C | 4.16158  | -0.24415 | 1.16605  |
| C | 3.09872  | 1.92126  | 0.40748  |
| H | 2.84581  | 2.55587  | -0.45094 |
| H | 2.17070  | 1.69439  | 0.94493  |
| H | 3.73804  | 2.50479  | 1.07953  |
| H | 3.57429  | -1.01052 | -1.42299 |
| H | 3.25565  | -0.57007 | 1.68974  |
| H | 4.70815  | -1.14199 | 0.85363  |
| H | 4.78791  | 0.30320  | 1.87967  |

4o\_conformer-026

|   |          |          |          |
|---|----------|----------|----------|
| C | 0.56301  | -0.52177 | -0.13552 |
| C | 0.11479  | -1.78955 | 0.21934  |
| C | -1.26907 | -1.86044 | -0.08922 |
| C | -1.65270 | -0.64027 | -0.62651 |
| N | -0.53061 | 0.15671  | -0.64288 |
| H | -0.49892 | 1.08736  | -1.03302 |
| H | 0.72278  | -2.56551 | 0.66536  |
| H | -1.92625 | -2.70569 | 0.06506  |
| C | 1.86642  | 0.09363  | -0.03893 |
| C | 2.20969  | 1.42699  | -0.11365 |
| S | 3.30179  | -0.89048 | 0.20188  |
| C | 3.61055  | 1.66141  | 0.02766  |
| H | 1.48233  | 2.22154  | -0.24078 |
| C | 4.33085  | 0.51471  | 0.21352  |
| H | 4.05848  | 2.64876  | 0.00217  |
| H | 5.39613  | 0.40031  | 0.35878  |
| C | -2.98524 | -0.14638 | -1.09504 |
| H | -3.57430 | -1.01051 | -1.42299 |
| C | -3.80716 | 0.63639  | -0.03647 |
| H | -4.74293 | 0.92284  | -0.53677 |
| C | -3.09872 | 1.92126  | 0.40750  |
| C | -4.16157 | -0.24415 | 1.16606  |
| H | -4.78791 | 0.30319  | 1.87969  |
| H | -4.70814 | -1.14199 | 0.85364  |
| H | -3.25565 | -0.57007 | 1.68975  |
| H | -2.85046 | 0.49446  | -1.97687 |

|   |          |         |          |
|---|----------|---------|----------|
| H | -2.84581 | 2.55587 | -0.45093 |
| H | -3.73804 | 2.50479 | 1.07955  |
| H | -2.17070 | 1.69440 | 0.94495  |

4o\_conformer-027

|   |          |          |          |
|---|----------|----------|----------|
| C | 0.68446  | -0.55061 | -0.04203 |
| C | 0.31066  | -1.81732 | 0.39443  |
| C | -1.08364 | -1.95875 | 0.16877  |
| C | -1.54692 | -0.78159 | -0.40033 |
| N | -0.46367 | 0.05816  | -0.51654 |
| H | -0.49612 | 0.97247  | -0.94381 |
| H | 0.97538  | -2.54711 | 0.83753  |
| H | -1.69387 | -2.82211 | 0.39866  |
| C | 1.96389  | 0.11994  | -0.04877 |
| C | 2.24612  | 1.45989  | -0.21055 |
| S | 3.45049  | -0.79235 | 0.16287  |
| C | 3.64133  | 1.75672  | -0.15890 |
| H | 1.48009  | 2.21708  | -0.33853 |
| C | 4.41845  | 0.65103  | 0.04552  |
| H | 4.04502  | 2.75826  | -0.25961 |
| H | 5.49378  | 0.58667  | 0.13773  |
| C | -2.92615 | -0.36104 | -0.79730 |
| H | -3.46070 | -1.23603 | -1.18538 |
| C | -3.76212 | 0.25804  | 0.34972  |
| H | -3.80983 | -0.48831 | 1.15517  |
| C | -5.18855 | 0.53955  | -0.13488 |
| C | -3.11088 | 1.52645  | 0.91073  |
| H | -3.71526 | 1.94875  | 1.72153  |
| H | -2.10966 | 1.32530  | 1.30503  |
| H | -3.01825 | 2.29276  | 0.12947  |
| H | -2.87138 | 0.36241  | -1.62318 |
| H | -5.18393 | 1.27759  | -0.94744 |
| H | -5.66929 | -0.37090 | -0.51157 |
| H | -5.80792 | 0.93968  | 0.67591  |

4o\_conformer-028

|   |          |          |          |
|---|----------|----------|----------|
| C | 0.59014  | 0.82161  | -0.08466 |
| C | 0.02184  | 2.02224  | 0.32693  |
| C | -1.36076 | 1.97614  | 0.00783  |
| C | -1.62529 | 0.75206  | -0.58881 |
| N | -0.43253 | 0.06560  | -0.63026 |
| H | -0.31002 | -0.83224 | -1.07708 |
| H | 0.55214  | 2.82529  | 0.82050  |
| H | -2.09645 | 2.74637  | 0.19731  |

|   |          |          |          |
|---|----------|----------|----------|
| C | 1.95524  | 0.35447  | -0.00022 |
| C | 3.10515  | 1.10052  | 0.14189  |
| S | 2.34605  | -1.36134 | -0.02665 |
| C | 4.28972  | 0.30984  | 0.22048  |
| H | 3.09812  | 2.18433  | 0.16800  |
| C | 4.04866  | -1.03326 | 0.13125  |
| H | 5.28478  | 0.72857  | 0.32435  |
| H | 4.75503  | -1.85166 | 0.14311  |
| C | -2.90347 | 0.15839  | -1.09174 |
| H | -2.70793 | -0.41622 | -2.00726 |
| C | -3.64707 | -0.75692 | -0.08255 |
| H | -4.55411 | -1.09832 | -0.60098 |
| C | -4.07744 | 0.01650  | 1.16795  |
| C | -2.82339 | -1.99550 | 0.28823  |
| H | -2.52367 | -2.55881 | -0.60414 |
| H | -1.91413 | -1.71627 | 0.83303  |
| H | -3.40244 | -2.66841 | 0.93075  |
| H | -3.57269 | 0.97901  | -1.37451 |
| H | -3.20384 | 0.39105  | 1.71358  |
| H | -4.70254 | 0.87863  | 0.90628  |
| H | -4.65143 | -0.62552 | 1.84580  |

#### 4o\_conformer-029

|   |          |          |          |
|---|----------|----------|----------|
| C | -0.59014 | 0.82161  | -0.08466 |
| C | -0.02186 | 2.02225  | 0.32691  |
| C | 1.36075  | 1.97615  | 0.00782  |
| C | 1.62529  | 0.75207  | -0.58880 |
| N | 0.43253  | 0.06560  | -0.63024 |
| H | 0.31003  | -0.83225 | -1.07705 |
| H | -0.55216 | 2.82531  | 0.82047  |
| H | 2.09643  | 2.74640  | 0.19729  |
| C | -1.95524 | 0.35447  | -0.00022 |
| C | -3.10515 | 1.10052  | 0.14191  |
| S | -2.34605 | -1.36135 | -0.02666 |
| C | -4.28972 | 0.30983  | 0.22050  |
| H | -3.09812 | 2.18432  | 0.16802  |
| C | -4.04866 | -1.03327 | 0.13125  |
| H | -5.28478 | 0.72857  | 0.32437  |
| H | -4.75503 | -1.85167 | 0.14310  |
| C | 2.90348  | 0.15840  | -1.09173 |
| H | 3.57269  | 0.97904  | -1.37448 |
| C | 3.64707  | -0.75692 | -0.08254 |
| H | 4.55412  | -1.09831 | -0.60099 |
| C | 2.82340  | -1.99551 | 0.28820  |
| C | 4.07744  | 0.01648  | 1.16796  |

|   |         |          |          |
|---|---------|----------|----------|
| H | 4.70254 | 0.87862  | 0.90631  |
| H | 3.20384 | 0.39102  | 1.71360  |
| H | 4.65143 | -0.62555 | 1.84580  |
| H | 2.70795 | -0.41619 | -2.00725 |
| H | 2.52370 | -2.55881 | -0.60418 |
| H | 3.40245 | -2.66842 | 0.93073  |
| H | 1.91412 | -1.71629 | 0.83300  |

4o\_conformer-030

|   |          |          |          |
|---|----------|----------|----------|
| C | 0.56277  | -0.49354 | -0.31581 |
| C | 0.09282  | -1.79604 | -0.18496 |
| C | -1.29921 | -1.78282 | -0.46181 |
| C | -1.66663 | -0.47769 | -0.75631 |
| N | -0.52502 | 0.28585  | -0.66642 |
| H | -0.49765 | 1.28738  | -0.79136 |
| H | 0.69965  | -2.65822 | 0.05812  |
| H | -1.97033 | -2.63116 | -0.45653 |
| C | 1.88634  | 0.06457  | -0.16306 |
| C | 2.36854  | 1.29290  | -0.56307 |
| S | 3.15035  | -0.84971 | 0.64548  |
| C | 3.74151  | 1.49938  | -0.23193 |
| H | 1.76913  | 2.02134  | -1.09833 |
| C | 4.30439  | 0.43410  | 0.41344  |
| H | 4.28723  | 2.40426  | -0.47595 |
| H | 5.31948  | 0.31543  | 0.76631  |
| C | -3.00077 | 0.12058  | -1.07544 |
| H | -3.61221 | -0.64568 | -1.56592 |
| C | -3.78708 | 0.66791  | 0.14585  |
| H | -4.72540 | 1.07198  | -0.25948 |
| C | -3.04369 | 1.81281  | 0.84300  |
| C | -4.13917 | -0.44681 | 1.13613  |
| H | -4.70740 | -1.24737 | 0.64758  |
| H | -3.23171 | -0.89187 | 1.55982  |
| H | -4.74406 | -0.05736 | 1.96292  |
| H | -2.87315 | 0.93325  | -1.80293 |
| H | -2.10703 | 1.46022  | 1.29038  |
| H | -2.80118 | 2.61972  | 0.14049  |
| H | -3.65466 | 2.24035  | 1.64600  |

4o\_conformer-031

|   |          |          |          |
|---|----------|----------|----------|
| C | -0.56277 | -0.49354 | -0.31583 |
| C | -0.09281 | -1.79604 | -0.18501 |
| C | 1.29921  | -1.78282 | -0.46186 |
| C | 1.66663  | -0.47768 | -0.75633 |

|   |          |          |          |
|---|----------|----------|----------|
| N | 0.52502  | 0.28586  | -0.66641 |
| H | 0.49765  | 1.28739  | -0.79131 |
| H | -0.69965 | -2.65823 | 0.05803  |
| H | 1.97034  | -2.63116 | -0.45660 |
| C | -1.88634 | 0.06456  | -0.16308 |
| C | -2.36857 | 1.29286  | -0.56314 |
| S | -3.15032 | -0.84969 | 0.64555  |
| C | -3.74153 | 1.49935  | -0.23197 |
| H | -1.76918 | 2.02128  | -1.09847 |
| C | -4.30438 | 0.43410  | 0.41347  |
| H | -4.28726 | 2.40420  | -0.47603 |
| H | -5.31946 | 0.31543  | 0.76637  |
| C | 3.00077  | 0.12061  | -1.07543 |
| H | 2.87315  | 0.93328  | -1.80291 |
| C | 3.78707  | 0.66791  | 0.14587  |
| H | 4.72539  | 1.07199  | -0.25944 |
| C | 4.13916  | -0.44682 | 1.13613  |
| C | 3.04368  | 1.81280  | 0.84303  |
| H | 2.80117  | 2.61972  | 0.14053  |
| H | 2.10702  | 1.46021  | 1.29040  |
| H | 3.65464  | 2.24034  | 1.64604  |
| H | 3.61221  | -0.64565 | -1.56592 |
| H | 3.23170  | -0.89188 | 1.55982  |
| H | 4.70740  | -1.24737 | 0.64758  |
| H | 4.74404  | -0.05738 | 1.96294  |

#### 4o\_conformer-032

|   |          |          |          |
|---|----------|----------|----------|
| C | 0.57122  | 0.74752  | -0.17604 |
| C | -0.01124 | 2.00935  | -0.11834 |
| C | -1.38184 | 1.86727  | -0.45888 |
| C | -1.62428 | 0.52693  | -0.72232 |
| N | -0.42801 | -0.13289 | -0.55172 |
| H | -0.31775 | -1.13460 | -0.62338 |
| H | 0.51223  | 2.92678  | 0.11403  |
| H | -2.12060 | 2.65533  | -0.51877 |
| C | 1.93349  | 0.33520  | 0.07441  |
| C | 2.90949  | 1.00537  | 0.78016  |
| S | 2.57683  | -1.17309 | -0.56442 |
| C | 4.15842  | 0.31767  | 0.81662  |
| H | 2.72621  | 1.95333  | 1.27323  |
| C | 4.13668  | -0.87607 | 0.14996  |
| H | 5.03517  | 0.69306  | 1.33300  |
| H | 4.92871  | -1.60248 | 0.03222  |
| C | -2.88566 | -0.19292 | -1.08302 |
| H | -2.65592 | -1.00528 | -1.78546 |

|   |          |          |          |
|---|----------|----------|----------|
| C | -3.67503 | -0.78321 | 0.11605  |
| H | -4.55710 | -1.27377 | -0.31902 |
| C | -4.16283 | 0.31541  | 1.06588  |
| C | -2.86823 | -1.84730 | 0.86862  |
| H | -3.47656 | -2.31460 | 1.65119  |
| H | -1.98827 | -1.40671 | 1.35172  |
| H | -2.52346 | -2.64047 | 0.19362  |
| H | -3.53885 | 0.50706  | -1.61680 |
| H | -4.76619 | -0.10898 | 1.87643  |
| H | -4.77660 | 1.05422  | 0.53684  |
| H | -3.31538 | 0.84551  | 1.51527  |

#### 4o\_conformer-033

|   |          |          |          |
|---|----------|----------|----------|
| C | -0.57130 | 0.74745  | -0.17603 |
| C | 0.01118  | 2.00928  | -0.11840 |
| C | 1.38177  | 1.86716  | -0.45892 |
| C | 1.62422  | 0.52681  | -0.72228 |
| N | 0.42794  | -0.13299 | -0.55164 |
| H | 0.31760  | -1.13469 | -0.62341 |
| H | -0.51227 | 2.92673  | 0.11393  |
| H | 2.12054  | 2.65522  | -0.51885 |
| C | -1.93358 | 0.33517  | 0.07441  |
| C | -2.90958 | 1.00541  | 0.78008  |
| S | -2.57693 | -1.17316 | -0.56431 |
| C | -4.15852 | 0.31775  | 0.81656  |
| H | -2.72630 | 1.95341  | 1.27309  |
| C | -4.13680 | -0.87604 | 0.14999  |
| H | -5.03528 | 0.69319  | 1.33291  |
| H | -4.92883 | -1.60244 | 0.03230  |
| C | 2.88559  | -0.19304 | -1.08303 |
| H | 3.53865  | 0.50688  | -1.61704 |
| C | 3.67522  | -0.78306 | 0.11601  |
| H | 4.55735  | -1.27345 | -0.31914 |
| C | 2.86878  | -1.84728 | 0.86876  |
| C | 4.16293  | 0.31573  | 1.06569  |
| H | 4.76661  | -0.10847 | 1.87610  |
| H | 4.77636  | 1.05471  | 0.53649  |
| H | 3.31544  | 0.84560  | 1.51528  |
| H | 2.65580  | -1.00554 | -1.78528 |
| H | 1.98858  | -1.40692 | 1.35166  |
| H | 2.52441  | -2.64076 | 0.19393  |
| H | 3.47722  | -2.31413 | 1.65152  |

#### 4o\_conformer-034

|   |          |          |          |
|---|----------|----------|----------|
| C | -0.56275 | -0.49357 | -0.31596 |
| C | -0.09281 | -1.79610 | -0.18526 |
| C | 1.29923  | -1.78285 | -0.46204 |
| C | 1.66667  | -0.47769 | -0.75636 |
| N | 0.52506  | 0.28585  | -0.66642 |
| H | 0.49771  | 1.28740  | -0.79120 |
| H | -0.69966 | -2.65831 | 0.05765  |
| H | 1.97034  | -2.63120 | -0.45690 |
| C | -1.88631 | 0.06453  | -0.16318 |
| C | -2.36864 | 1.29271  | -0.56347 |
| S | -3.15015 | -0.84957 | 0.64585  |
| C | -3.74157 | 1.49923  | -0.23217 |
| H | -1.76935 | 2.02102  | -1.09906 |
| C | -4.30430 | 0.43411  | 0.41361  |
| H | -4.28737 | 2.40401  | -0.47637 |
| H | -5.31933 | 0.31549  | 0.76667  |
| C | 3.00082  | 0.12060  | -1.07539 |
| H | 2.87323  | 0.93328  | -1.80287 |
| C | 3.78702  | 0.66792  | 0.14599  |
| H | 4.72541  | 1.07190  | -0.25924 |
| C | 4.13887  | -0.44678 | 1.13635  |
| C | 3.04362  | 1.81290  | 0.84300  |
| H | 2.80135  | 2.61985  | 0.14046  |
| H | 2.10683  | 1.46041  | 1.29019  |
| H | 3.65448  | 2.24036  | 1.64613  |
| H | 3.61232  | -0.64563 | -1.56585 |
| H | 4.70698  | -1.24749 | 0.64790  |
| H | 3.23130  | -0.89162 | 1.56004  |
| H | 4.74379  | -0.05738 | 1.96314  |

4o\_conformer-035

|   |          |          |          |
|---|----------|----------|----------|
| C | 0.56278  | -0.49363 | -0.31589 |
| C | 0.09286  | -1.79616 | -0.18514 |
| C | -1.29917 | -1.78295 | -0.46193 |
| C | -1.66665 | -0.47780 | -0.75629 |
| N | -0.52504 | 0.28576  | -0.66639 |
| H | -0.49771 | 1.28730  | -0.79116 |
| H | 0.69973  | -2.65835 | 0.05780  |
| H | -1.97026 | -2.63131 | -0.45671 |
| C | 1.88632  | 0.06452  | -0.16314 |
| C | 2.36854  | 1.29278  | -0.56334 |
| S | 3.15027  | -0.84956 | 0.64573  |
| C | 3.74146  | 1.49936  | -0.23210 |
| H | 1.76917  | 2.02108  | -1.09885 |
| C | 4.30431  | 0.43422  | 0.41353  |

|   |          |          |          |
|---|----------|----------|----------|
| H | 4.28718  | 2.40420  | -0.47625 |
| H | 5.31936  | 0.31564  | 0.76652  |
| C | -3.00080 | 0.12046  | -1.07538 |
| H | -3.61225 | -0.64586 | -1.56575 |
| C | -3.78705 | 0.66788  | 0.14591  |
| H | -4.72548 | 1.07173  | -0.25939 |
| C | -3.04379 | 1.81304  | 0.84275  |
| C | -4.13884 | -0.44671 | 1.13642  |
| H | -3.23126 | -0.89147 | 1.56017  |
| H | -4.74378 | -0.05722 | 1.96317  |
| H | -4.70693 | -1.24750 | 0.64808  |
| H | -2.87324 | 0.93306  | -1.80295 |
| H | -3.65469 | 2.24054  | 1.64583  |
| H | -2.10695 | 1.46075  | 1.29000  |
| H | -2.80163 | 2.61993  | 0.14010  |

#### 4o\_conformer-036

|   |          |          |          |
|---|----------|----------|----------|
| C | 0.59015  | 0.82151  | -0.08464 |
| C | 0.02176  | 2.02209  | 0.32697  |
| C | -1.36082 | 1.97591  | 0.00781  |
| C | -1.62525 | 0.75184  | -0.58889 |
| N | -0.43244 | 0.06545  | -0.63031 |
| H | -0.30984 | -0.83232 | -1.07723 |
| H | 0.55198  | 2.82515  | 0.82060  |
| H | -2.09655 | 2.74611  | 0.19728  |
| C | 1.95528  | 0.35447  | -0.00018 |
| C | 3.10513  | 1.10061  | 0.14205  |
| S | 2.34624  | -1.36130 | -0.02677 |
| C | 4.28976  | 0.31002  | 0.22060  |
| H | 3.09800  | 2.18441  | 0.16827  |
| C | 4.04882  | -1.03309 | 0.13122  |
| H | 5.28478  | 0.72882  | 0.32455  |
| H | 4.75525  | -1.85143 | 0.14303  |
| C | -2.90332 | 0.15799  | -1.09192 |
| H | -2.70753 | -0.41692 | -2.00720 |
| C | -3.64709 | -0.75701 | -0.08260 |
| H | -4.55384 | -1.09888 | -0.60125 |
| C | -4.07818 | 0.01688  | 1.16736  |
| C | -2.82326 | -1.99521 | 0.28908  |
| H | -1.91434 | -1.71549 | 0.83421  |
| H | -3.40244 | -2.66801 | 0.93160  |
| H | -2.52294 | -2.55881 | -0.60290 |
| H | -3.57253 | 0.97847  | -1.37514 |
| H | -4.65224 | -0.62499 | 1.84529  |
| H | -3.20491 | 0.39195  | 1.71315  |



|   |          |         |         |
|---|----------|---------|---------|
| H | -4.70345 | 0.87868 | 0.90503 |
|---|----------|---------|---------|

4o\_conformer-037

|   |          |          |          |
|---|----------|----------|----------|
| C | -0.59018 | 0.82151  | -0.08465 |
| C | -0.02183 | 2.02212  | 0.32694  |
| C | 1.36077  | 1.97596  | 0.00781  |
| C | 1.62524  | 0.75189  | -0.58885 |
| N | 0.43245  | 0.06547  | -0.63028 |
| H | 0.30988  | -0.83233 | -1.07716 |
| H | -0.55208 | 2.82518  | 0.82054  |
| H | 2.09649  | 2.74617  | 0.19729  |
| C | -1.95530 | 0.35445  | -0.00021 |
| C | -3.10516 | 1.10057  | 0.14193  |
| S | -2.34621 | -1.36134 | -0.02667 |
| C | -4.28978 | 0.30996  | 0.22052  |
| H | -3.09806 | 2.18438  | 0.16806  |
| C | -4.04880 | -1.03315 | 0.13126  |
| H | -5.28481 | 0.72875  | 0.32441  |
| H | -4.75522 | -1.85151 | 0.14311  |
| C | 2.90338  | 0.15817  | -1.09184 |
| H | 3.57252  | 0.97876  | -1.37489 |
| C | 3.64718  | -0.75689 | -0.08258 |
| H | 4.55411  | -1.09843 | -0.60113 |
| C | 2.82357  | -1.99536 | 0.28867  |
| C | 4.07784  | 0.01684  | 1.16763  |
| H | 4.65196  | -0.62503 | 1.84552  |
| H | 4.70290  | 0.87888  | 0.90561  |
| H | 3.20437  | 0.39154  | 1.71336  |
| H | 2.70772  | -0.41664 | -2.00720 |
| H | 2.52373  | -2.55894 | -0.60348 |
| H | 3.40273  | -2.66808 | 0.93130  |
| H | 1.91439  | -1.71598 | 0.83353  |

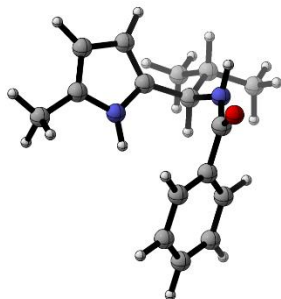

4p\_conformer-001

|   |         |         |          |
|---|---------|---------|----------|
| C | 1.59140 | 0.38292 | -0.04842 |
| C | 2.83069 | 0.86060 | 0.33619  |
| C | 2.80200 | 2.28241 | 0.21749  |

|   |          |          |          |
|---|----------|----------|----------|
| C | 1.54550  | 2.64652  | -0.23132 |
| N | 0.82622  | 1.48242  | -0.38765 |
| H | 3.61241  | 2.96817  | 0.42786  |
| C | 0.95610  | 3.98402  | -0.54161 |
| H | -0.14046 | 1.43935  | -0.68102 |
| H | 0.68361  | 4.07829  | -1.60086 |
| H | 0.04880  | 4.17623  | 0.04551  |
| H | 1.67803  | 4.77204  | -0.31076 |
| C | 0.98135  | -0.98935 | -0.01924 |
| H | 3.66465  | 0.25521  | 0.66536  |
| N | 0.28723  | -1.21221 | 1.27541  |
| H | 0.21729  | -1.04842 | -0.79776 |
| C | 1.98994  | -2.12811 | -0.27278 |
| C | 1.31336  | -3.49984 | -0.16252 |
| C | 2.65298  | -1.96904 | -1.64683 |
| H | 2.77061  | -2.06367 | 0.49927  |
| H | 3.37311  | -2.77665 | -1.81654 |
| H | 1.90031  | -2.01979 | -2.44405 |
| H | 3.17759  | -1.01471 | -1.73610 |
| H | 2.04371  | -4.29821 | -0.33256 |
| H | 0.85861  | -3.65317 | 0.81964  |
| H | 0.52481  | -3.60195 | -0.91933 |
| H | 0.91983  | -1.30291 | 2.06631  |
| C | -0.89594 | -0.63597 | 1.64717  |
| O | -1.15704 | -0.39458 | 2.82875  |
| C | -3.79465 | 0.29878  | -1.38411 |
| C | -3.18910 | -0.95980 | -1.38133 |
| C | -2.23307 | -1.27391 | -0.41540 |
| C | -1.88997 | -0.33399 | 0.56517  |
| C | -2.52218 | 0.91608  | 0.57695  |
| C | -3.45897 | 1.23734  | -0.40472 |
| H | -4.52932 | 0.54631  | -2.14453 |
| H | -3.45869 | -1.69626 | -2.13230 |
| H | -1.76301 | -2.25254 | -0.41122 |
| H | -2.26492 | 1.63102  | 1.35211  |
| H | -3.93145 | 2.21499  | -0.40153 |

4p\_conformer-002

|   |          |          |          |
|---|----------|----------|----------|
| C | -1.68156 | 0.06683  | -0.47640 |
| C | -2.71167 | 0.08106  | -1.39908 |
| C | -3.40199 | -1.16366 | -1.29689 |
| C | -2.78472 | -1.91276 | -0.31315 |
| N | -1.73936 | -1.15425 | 0.16772  |
| H | -4.26198 | -1.47793 | -1.87410 |
| C | -3.08891 | -3.27050 | 0.23176  |

|   |          |          |          |
|---|----------|----------|----------|
| H | -1.13956 | -1.43168 | 0.93194  |
| H | -2.24190 | -3.95905 | 0.11621  |
| H | -3.33860 | -3.23883 | 1.30042  |
| H | -3.94364 | -3.70009 | -0.29783 |
| C | -0.58155 | 1.06249  | -0.18956 |
| H | -2.93908 | 0.89023  | -2.07966 |
| N | -0.02285 | 0.83645  | 1.15473  |
| H | 0.23981  | 0.89743  | -0.89241 |
| C | -1.05050 | 2.52667  | -0.35830 |
| C | -2.11156 | 2.92623  | 0.67452  |
| C | 0.13707  | 3.49375  | -0.33483 |
| H | -1.50911 | 2.57780  | -1.35368 |
| H | 0.66114  | 3.44298  | 0.62633  |
| H | 0.85604  | 3.26465  | -1.12967 |
| H | -0.20375 | 4.52478  | -0.47777 |
| H | -2.50566 | 3.92226  | 0.44727  |
| H | -1.68674 | 2.96929  | 1.68501  |
| H | -2.94841 | 2.22101  | 0.67994  |
| H | -0.69872 | 0.92805  | 1.90783  |
| C | 0.94449  | -0.08331 | 1.47516  |
| O | 0.92756  | -0.66370 | 2.56562  |
| C | 4.13498  | -0.92945 | -1.26762 |
| C | 3.70843  | 0.39008  | -1.10323 |
| C | 2.65663  | 0.68160  | -0.23483 |
| C | 2.03298  | -0.34717 | 0.48353  |
| C | 2.48298  | -1.66547 | 0.33568  |
| C | 3.52056  | -1.95733 | -0.54685 |
| H | 4.94820  | -1.15616 | -1.95081 |
| H | 4.19511  | 1.19307  | -1.64856 |
| H | 2.33590  | 1.70789  | -0.09531 |
| H | 2.00802  | -2.45246 | 0.91246  |
| H | 3.85413  | -2.98344 | -0.66922 |

4p\_conformer-003

|   |          |         |          |
|---|----------|---------|----------|
| C | -0.54005 | 1.17338 | 0.68891  |
| C | -0.08764 | 1.80154 | 1.83445  |
| C | 1.17882  | 2.38449 | 1.54054  |
| C | 1.47251  | 2.10755 | 0.21686  |
| N | 0.41276  | 1.39063 | -0.28697 |
| H | 1.80533  | 2.95646 | 2.21260  |
| C | 2.65540  | 2.45737 | -0.62491 |
| H | 0.41770  | 0.94497 | -1.19319 |
| H | 3.14750  | 1.56003 | -1.02036 |
| H | 2.37967  | 3.08502 | -1.48219 |
| H | 3.38745  | 3.00832 | -0.02807 |

|   |          |          |          |
|---|----------|----------|----------|
| C | -1.79985 | 0.37941  | 0.47904  |
| H | -0.61977 | 1.83716  | 2.77649  |
| N | -1.71207 | -1.00216 | 1.03354  |
| H | -2.56442 | 0.84713  | 1.11003  |
| C | -2.35065 | 0.42643  | -0.96703 |
| C | -3.56962 | -0.48757 | -1.12502 |
| C | -2.70281 | 1.86970  | -1.35188 |
| H | -1.57190 | 0.06689  | -1.65084 |
| H | -3.48323 | 2.26476  | -0.68923 |
| H | -1.83624 | 2.53353  | -1.28629 |
| H | -3.08524 | 1.90766  | -2.37744 |
| H | -3.95567 | -0.43385 | -2.14855 |
| H | -3.32189 | -1.52988 | -0.90510 |
| H | -4.37572 | -0.18110 | -0.44581 |
| H | -2.44044 | -1.23544 | 1.69894  |
| C | -0.61898 | -1.80227 | 1.18633  |
| O | -0.58244 | -2.68334 | 2.05128  |
| C | 2.69671  | -1.33200 | -1.50062 |
| C | 1.42491  | -1.60042 | -2.01283 |
| C | 0.33974  | -1.74311 | -1.14624 |
| C | 0.52400  | -1.61940 | 0.23600  |
| C | 1.80600  | -1.39261 | 0.74720  |
| C | 2.88541  | -1.23379 | -0.11913 |
| H | 3.53954  | -1.20982 | -2.17444 |
| H | 1.27775  | -1.70151 | -3.08399 |
| H | -0.64713 | -1.96217 | -1.54045 |
| H | 1.94371  | -1.31176 | 1.82051  |
| H | 3.87422  | -1.03104 | 0.28127  |

4p\_conformer-004

|   |          |          |          |
|---|----------|----------|----------|
| C | -0.84913 | -0.64210 | -0.40012 |
| C | -0.27436 | -1.24257 | -1.50107 |
| C | 0.00072  | -2.60030 | -1.15870 |
| C | -0.40751 | -2.79912 | 0.14741  |
| N | -0.92844 | -1.60109 | 0.58970  |
| H | 0.45887  | -3.35105 | -1.78943 |
| C | -0.35004 | -4.00680 | 1.02506  |
| H | -1.28080 | -1.43906 | 1.52238  |
| H | 0.10516  | -4.83928 | 0.48162  |
| H | 0.24766  | -3.82924 | 1.92859  |
| H | -1.34792 | -4.32599 | 1.35296  |
| C | -1.32898 | 0.76275  | -0.18956 |
| H | -0.05734 | -0.74669 | -2.43781 |
| N | -0.79344 | 1.33398  | 1.06772  |
| H | -0.96897 | 1.35528  | -1.03662 |

|   |          |          |          |
|---|----------|----------|----------|
| C | -2.87290 | 0.90395  | -0.16121 |
| C | -3.29287 | 2.37681  | -0.05918 |
| C | -3.50117 | 0.25445  | -1.39827 |
| H | -3.23654 | 0.36847  | 0.72892  |
| H | -3.13184 | 0.73034  | -2.31540 |
| H | -3.26864 | -0.81195 | -1.45707 |
| H | -4.58967 | 0.37196  | -1.37403 |
| H | -4.38444 | 2.46032  | -0.03007 |
| H | -2.89606 | 2.86768  | 0.83464  |
| H | -2.93589 | 2.93562  | -0.93333 |
| H | -1.46100 | 1.44268  | 1.82369  |
| C | 0.48949  | 1.22211  | 1.52689  |
| O | 0.74988  | 1.30860  | 2.73035  |
| C | 3.65030  | 0.59301  | -1.30664 |
| C | 2.70019  | 1.58772  | -1.54984 |
| C | 1.65874  | 1.79429  | -0.64595 |
| C | 1.57078  | 1.01421  | 0.51287  |
| C | 2.54529  | 0.04392  | 0.77146  |
| C | 3.57215  | -0.17786 | -0.14364 |
| H | 4.45362  | 0.42381  | -2.01778 |
| H | 2.76937  | 2.20126  | -2.44326 |
| H | 0.92322  | 2.57061  | -0.83222 |
| H | 2.47768  | -0.54327 | 1.68164  |
| H | 4.31349  | -0.94739 | 0.05062  |

#### 4p\_conformer-005

|   |          |          |          |
|---|----------|----------|----------|
| C | -0.87496 | -0.44254 | -0.47945 |
| C | -0.46237 | -1.15377 | -1.58831 |
| C | -0.15501 | -2.48050 | -1.16186 |
| C | -0.38048 | -2.55030 | 0.20041  |
| N | -0.82859 | -1.30792 | 0.59476  |
| H | 0.20577  | -3.29473 | -1.77680 |
| C | -0.20780 | -3.67082 | 1.17307  |
| H | -1.04476 | -1.05179 | 1.54729  |
| H | -1.15126 | -3.93792 | 1.66663  |
| H | 0.16148  | -4.55963 | 0.65424  |
| H | 0.51260  | -3.41955 | 1.96245  |
| C | -1.28543 | 0.99535  | -0.33987 |
| H | -0.36842 | -0.75031 | -2.58781 |
| N | -0.75173 | 1.59597  | 0.89861  |
| H | -0.87195 | 1.52892  | -1.20173 |
| C | -2.82101 | 1.23168  | -0.37398 |
| C | -3.37093 | 0.91198  | -1.76696 |
| C | -3.58168 | 0.44790  | 0.70290  |
| H | -2.96220 | 2.30631  | -0.18988 |

|   |          |          |          |
|---|----------|----------|----------|
| H | -3.50466 | -0.63007 | 0.52616  |
| H | -3.21202 | 0.64923  | 1.71524  |
| H | -4.64248 | 0.71837  | 0.68432  |
| H | -4.44473 | 1.12182  | -1.81183 |
| H | -2.87436 | 1.51089  | -2.53893 |
| H | -3.21849 | -0.14537 | -2.00950 |
| H | -1.42892 | 1.90933  | 1.58439  |
| C | 0.50362  | 1.44835  | 1.41484  |
| O | 0.74126  | 1.67737  | 2.60433  |
| C | 3.66652  | 0.19082  | -1.20007 |
| C | 2.86409  | 1.27461  | -1.56387 |
| C | 1.82101  | 1.68071  | -0.73223 |
| C | 1.58748  | 1.01408  | 0.47594  |
| C | 2.41619  | -0.04762 | 0.85497  |
| C | 3.44086  | -0.46991 | 0.01046  |
| H | 4.46937  | -0.13479 | -1.85515 |
| H | 3.04740  | 1.80034  | -2.49632 |
| H | 1.19605  | 2.52231  | -1.01512 |
| H | 2.23644  | -0.54897 | 1.80060  |
| H | 4.06666  | -1.30985 | 0.29754  |

4p\_conformer-006

|   |          |          |          |
|---|----------|----------|----------|
| C | 0.83484  | 0.70636  | 0.17261  |
| C | 0.89438  | 1.14169  | 1.48518  |
| C | -0.05810 | 2.19212  | 1.63419  |
| C | -0.68432 | 2.37501  | 0.41377  |
| N | -0.11444 | 1.48057  | -0.46163 |
| H | -0.26885 | 2.75481  | 2.53448  |
| C | -1.78654 | 3.29094  | -0.00573 |
| H | -0.46183 | 1.29710  | -1.39265 |
| H | -1.48237 | 3.95963  | -0.82125 |
| H | -2.66342 | 2.72823  | -0.35231 |
| H | -2.09810 | 3.91189  | 0.83865  |
| C | 1.50443  | -0.43008 | -0.55156 |
| H | 1.53331  | 0.73298  | 2.25562  |
| N | 1.27230  | -1.72357 | 0.12691  |
| H | 1.05484  | -0.48911 | -1.54862 |
| C | 3.02566  | -0.24966 | -0.78740 |
| C | 3.26551  | 0.94117  | -1.72121 |
| C | 3.84422  | -0.09515 | 0.50011  |
| H | 3.35673  | -1.16283 | -1.30174 |
| H | 4.91240  | -0.06854 | 0.26058  |
| H | 3.58733  | 0.83790  | 1.01091  |
| H | 3.68869  | -0.91802 | 1.20738  |
| H | 4.33207  | 1.04220  | -1.94768 |

|   |          |          |          |
|---|----------|----------|----------|
| H | 2.92856  | 1.87301  | -1.25312 |
| H | 2.72646  | 0.82319  | -2.66819 |
| H | 2.07198  | -2.14255 | 0.58785  |
| C | 0.08120  | -2.12259 | 0.66360  |
| O | 0.02035  | -2.96508 | 1.56235  |
| C | -3.46534 | -0.30102 | -0.93753 |
| C | -2.55393 | -0.91178 | -1.80309 |
| C | -1.39954 | -1.50687 | -1.29399 |
| C | -1.15651 | -1.50279 | 0.08516  |
| C | -2.09008 | -0.92498 | 0.95126  |
| C | -3.23260 | -0.31215 | 0.44020  |
| H | -4.35723 | 0.17478  | -1.33463 |
| H | -2.74087 | -0.92329 | -2.87286 |
| H | -0.68853 | -1.97847 | -1.96583 |
| H | -1.89733 | -0.93065 | 2.01886  |
| H | -3.94130 | 0.15811  | 1.11543  |

4p\_conformer-007

|   |          |          |          |
|---|----------|----------|----------|
| C | 0.83481  | 0.70629  | 0.17277  |
| C | 0.89434  | 1.14156  | 1.48535  |
| C | -0.05795 | 2.19219  | 1.63431  |
| C | -0.68403 | 2.37524  | 0.41384  |
| N | -0.11425 | 1.48071  | -0.46154 |
| H | -0.26866 | 2.75491  | 2.53459  |
| C | -1.78612 | 3.29132  | -0.00567 |
| H | -0.46164 | 1.29726  | -1.39256 |
| H | -1.48201 | 3.95960  | -0.82154 |
| H | -2.66329 | 2.72875  | -0.35176 |
| H | -2.09724 | 3.91269  | 0.83858  |
| C | 1.50431  | -0.43018 | -0.55146 |
| H | 1.53314  | 0.73272  | 2.25582  |
| N | 1.27222  | -1.72367 | 0.12701  |
| H | 1.05464  | -0.48922 | -1.54848 |
| C | 3.02554  | -0.24976 | -0.78743 |
| C | 3.26531  | 0.94106  | -1.72126 |
| C | 3.84419  | -0.09522 | 0.50002  |
| H | 3.35656  | -1.16295 | -1.30177 |
| H | 4.91235  | -0.06853 | 0.26038  |
| H | 3.58728  | 0.83779  | 1.01087  |
| H | 3.68881  | -0.91812 | 1.20729  |
| H | 4.33183  | 1.04203  | -1.94789 |
| H | 2.72609  | 0.82313  | -2.66815 |
| H | 2.92849  | 1.87292  | -1.25310 |
| H | 2.07187  | -2.14264 | 0.58802  |
| C | 0.08107  | -2.12283 | 0.66348  |

|   |          |          |          |
|---|----------|----------|----------|
| O | 0.02013  | -2.96547 | 1.56208  |
| C | -3.46528 | -0.30078 | -0.93753 |
| C | -3.23263 | -0.31219 | 0.44022  |
| C | -2.09018 | -0.92521 | 0.95121  |
| C | -1.15660 | -1.50291 | 0.08506  |
| C | -1.39954 | -1.50669 | -1.29410 |
| C | -2.55387 | -0.91142 | -1.80315 |
| H | -4.35712 | 0.17517  | -1.33459 |
| H | -3.94133 | 0.15799  | 1.11550  |
| H | -1.89747 | -0.93106 | 2.01883  |
| H | -0.68853 | -1.97822 | -1.96601 |
| H | -2.74074 | -0.92271 | -2.87294 |

4p\_conformer-008

|   |          |          |          |
|---|----------|----------|----------|
| C | 1.34488  | 0.80961  | -0.16072 |
| C | 1.68513  | 0.22118  | -1.36352 |
| C | 2.84769  | -0.57540 | -1.14326 |
| C | 3.19648  | -0.45934 | 0.18978  |
| N | 2.28153  | 0.39649  | 0.76484  |
| H | 3.37505  | -1.17030 | -1.87751 |
| C | 4.31784  | -1.06235 | 0.97173  |
| H | 2.23648  | 0.61910  | 1.74945  |
| H | 3.95413  | -1.64081 | 1.83052  |
| H | 4.89401  | -1.73774 | 0.33346  |
| H | 5.00538  | -0.30004 | 1.36063  |
| C | 0.20586  | 1.69034  | 0.27162  |
| H | 1.14363  | 0.32160  | -2.29305 |
| N | -0.44459 | 1.16017  | 1.50044  |
| H | 0.62038  | 2.64654  | 0.61848  |
| C | -0.77906 | 2.02968  | -0.87594 |
| C | -2.06739 | 2.67593  | -0.35181 |
| C | -0.10807 | 2.97689  | -1.88353 |
| H | -1.04143 | 1.09449  | -1.38516 |
| H | 0.83614  | 2.58087  | -2.26337 |
| H | -0.77177 | 3.15745  | -2.73596 |
| H | 0.09957  | 3.94578  | -1.41172 |
| H | -2.70475 | 2.96922  | -1.19281 |
| H | -1.84211 | 3.58016  | 0.22769  |
| H | -2.64843 | 2.00558  | 0.28684  |
| H | -0.57763 | 1.85121  | 2.23072  |
| C | -1.38291 | 0.16814  | 1.60636  |
| O | -2.17950 | 0.15874  | 2.54998  |
| C | -1.65851 | -3.02376 | -1.25258 |
| C | -0.43490 | -2.76439 | -0.63409 |
| C | -0.31323 | -1.70890 | 0.27067  |



|   |          |          |          |
|---|----------|----------|----------|
| C | -1.42692 | -0.91888 | 0.57546  |
| C | -2.66333 | -1.20472 | -0.02029 |
| C | -2.77492 | -2.23996 | -0.94567 |
| H | -1.74566 | -3.83722 | -1.96721 |
| H | 0.43325  | -3.37592 | -0.86115 |
| H | 0.64020  | -1.51385 | 0.74610  |
| H | -3.52967 | -0.60505 | 0.24132  |
| H | -3.73117 | -2.44191 | -1.41928 |

4p\_conformer-009

|   |          |          |          |
|---|----------|----------|----------|
| C | -1.81332 | 0.07362  | -0.41495 |
| C | -2.85627 | 0.08443  | -1.32217 |
| C | -3.77436 | -0.93788 | -0.93342 |
| C | -3.27649 | -1.54927 | 0.20212  |
| N | -2.08180 | -0.92726 | 0.49470  |
| H | -4.70264 | -1.19738 | -1.42599 |
| C | -3.81908 | -2.65640 | 1.04634  |
| H | -1.50430 | -1.10902 | 1.30380  |
| H | -4.76524 | -3.01181 | 0.62905  |
| H | -3.13175 | -3.51089 | 1.09512  |
| H | -4.00884 | -2.33290 | 2.07818  |
| C | -0.52972 | 0.85820  | -0.34596 |
| H | -2.94679 | 0.74396  | -2.17467 |
| N | 0.02989  | 0.78932  | 1.01167  |
| H | 0.21171  | 0.39192  | -1.00074 |
| C | -0.68255 | 2.32208  | -0.83209 |
| C | -1.64709 | 3.14445  | 0.02978  |
| C | 0.68900  | 2.99822  | -0.93601 |
| H | -1.10559 | 2.25162  | -1.84277 |
| H | 1.14622  | 3.11626  | 0.05319  |
| H | 1.37769  | 2.41426  | -1.55755 |
| H | 0.59371  | 3.99530  | -1.37875 |
| H | -2.62054 | 2.65291  | 0.11795  |
| H | -1.24791 | 3.30482  | 1.03933  |
| H | -1.80099 | 4.13396  | -0.41339 |
| H | -0.43246 | 1.37249  | 1.70233  |
| C | 1.33237  | 0.53213  | 1.35370  |
| O | 1.80985  | 0.96974  | 2.40339  |
| C | 3.78396  | -1.97860 | -1.12289 |
| C | 2.43613  | -2.30041 | -0.94933 |
| C | 1.61627  | -1.48326 | -0.17149 |
| C | 2.14464  | -0.34140 | 0.44724  |
| C | 3.50304  | -0.03820 | 0.29020  |
| C | 4.31630  | -0.84517 | -0.50248 |
| H | 4.41906  | -2.61181 | -1.73542 |

|   |         |          |          |
|---|---------|----------|----------|
| H | 2.02224 | -3.18838 | -1.41761 |
| H | 0.57137 | -1.74302 | -0.03432 |
| H | 3.90761 | 0.83505  | 0.79123  |
| H | 5.36498 | -0.59482 | -0.63220 |

4p\_conformer-010

|   |          |          |          |
|---|----------|----------|----------|
| C | 0.84898  | 0.64231  | -0.40017 |
| C | 0.27366  | 1.24253  | -1.50097 |
| C | -0.00198 | 2.60012  | -1.15850 |
| C | 0.40659  | 2.79915  | 0.14748  |
| N | 0.92821  | 1.60136  | 0.58961  |
| H | -0.46067 | 3.35067  | -1.78908 |
| C | 0.34868  | 4.00676  | 1.02519  |
| H | 1.28096  | 1.43952  | 1.52217  |
| H | -0.10706 | 4.83902  | 0.48185  |
| H | -0.24876 | 3.82886  | 1.92883  |
| H | 1.34645  | 4.32644  | 1.35293  |
| C | 1.32930  | -0.76238 | -0.18964 |
| H | 0.05652  | 0.74655  | -2.43764 |
| N | 0.79386  | -1.33380 | 1.06760  |
| H | 0.96949  | -1.35500 | -1.03672 |
| C | 2.87324  | -0.90317 | -0.16123 |
| C | 3.29364  | -2.37592 | -0.05929 |
| C | 3.50129  | -0.25344 | -1.39826 |
| H | 3.23675  | -0.36766 | 0.72896  |
| H | 4.58983  | -0.37069 | -1.37409 |
| H | 3.13203  | -0.72938 | -2.31540 |
| H | 3.26849  | 0.81290  | -1.45700 |
| H | 4.38524  | -2.45908 | -0.03019 |
| H | 2.89700  | -2.86697 | 0.83451  |
| H | 2.93683  | -2.93478 | -0.93347 |
| H | 1.46145  | -1.44239 | 1.82356  |
| C | -0.48908 | -1.22242 | 1.52681  |
| O | -0.74945 | -1.30923 | 2.73026  |
| C | -3.65007 | -0.59364 | -1.30654 |
| C | -2.69973 | -1.58810 | -1.54991 |
| C | -1.65822 | -1.79458 | -0.64609 |
| C | -1.57041 | -1.01463 | 0.51283  |
| C | -2.54510 | -0.04458 | 0.77157  |
| C | -3.57204 | 0.17710  | -0.14346 |
| H | -4.45346 | -0.42453 | -2.01763 |
| H | -2.76881 | -2.20153 | -2.44341 |
| H | -0.92250 | -2.57067 | -0.83249 |
| H | -2.47754 | 0.54251  | 1.68182  |
| H | -4.31353 | 0.94645  | 0.05092  |

## 4p\_conformer-011

|   |          |          |          |
|---|----------|----------|----------|
| C | -1.81309 | 0.07334  | -0.41504 |
| C | -2.85602 | 0.08369  | -1.32228 |
| C | -3.77385 | -0.93878 | -0.93334 |
| C | -3.27585 | -1.54979 | 0.20236  |
| N | -2.08133 | -0.92739 | 0.49484  |
| H | -4.70203 | -1.19864 | -1.42588 |
| C | -3.81814 | -2.65692 | 1.04678  |
| H | -1.50380 | -1.10884 | 1.30398  |
| H | -3.13065 | -3.51128 | 1.09558  |
| H | -4.00785 | -2.33332 | 2.07859  |
| H | -4.76428 | -3.01255 | 0.62962  |
| C | -0.52978 | 0.85842  | -0.34609 |
| H | -2.94669 | 0.74302  | -2.17492 |
| N | 0.02996  | 0.78976  | 1.01150  |
| H | 0.21179  | 0.39251  | -1.00096 |
| C | -0.68328 | 2.32229  | -0.83210 |
| C | -1.64804 | 3.14418  | 0.02996  |
| C | 0.68798  | 2.99900  | -0.93615 |
| H | -1.10643 | 2.25173  | -1.84272 |
| H | 0.59222  | 3.99608  | -1.37878 |
| H | 1.14530  | 3.11712  | 0.05299  |
| H | 1.37682  | 2.41537  | -1.55785 |
| H | -1.80238 | 4.13368  | -0.41308 |
| H | -2.62129 | 2.65224  | 0.11818  |
| H | -1.24883 | 3.30459  | 1.03949  |
| H | -0.43228 | 1.37307  | 1.70209  |
| C | 1.33245  | 0.53254  | 1.35349  |
| O | 1.81001  | 0.97030  | 2.40308  |
| C | 3.78387  | -1.97865 | -1.12279 |
| C | 2.43597  | -2.30024 | -0.94937 |
| C | 1.61616  | -1.48294 | -0.17163 |
| C | 2.14465  | -0.34115 | 0.44712  |
| C | 3.50312  | -0.03818 | 0.29023  |
| C | 4.31633  | -0.84530 | -0.50234 |
| H | 4.41893  | -2.61198 | -1.73524 |
| H | 2.02199  | -3.18816 | -1.41766 |
| H | 0.57121  | -1.74254 | -0.03454 |
| H | 3.90777  | 0.83501  | 0.79130  |
| H | 5.36506  | -0.59512 | -0.63196 |

## 4p\_conformer-012

|   |          |          |          |
|---|----------|----------|----------|
| C | -1.61751 | -0.24082 | -0.20432 |
|---|----------|----------|----------|

|   |          |          |          |
|---|----------|----------|----------|
| C | -1.76776 | -1.42280 | -0.90320 |
| C | -3.03548 | -1.97720 | -0.55188 |
| C | -3.63334 | -1.12303 | 0.35499  |
| N | -2.76085 | -0.07248 | 0.55173  |
| H | -3.46655 | -2.90023 | -0.91694 |
| C | -4.94710 | -1.19972 | 1.06252  |
| H | -2.94106 | 0.70450  | 1.17142  |
| H | -4.82510 | -1.23859 | 2.15277  |
| H | -5.58594 | -0.33602 | 0.83716  |
| H | -5.48276 | -2.10153 | 0.75392  |
| C | -0.49640 | 0.75460  | -0.21197 |
| H | -1.04496 | -1.83150 | -1.59721 |
| N | 0.13960  | 0.86966  | 1.11496  |
| H | 0.26246  | 0.37230  | -0.89713 |
| C | -0.91185 | 2.15992  | -0.72206 |
| C | 0.30020  | 3.09716  | -0.78496 |
| C | -1.59473 | 2.05800  | -2.09064 |
| H | -1.63715 | 2.57811  | -0.00749 |
| H | -1.87874 | 3.05325  | -2.44883 |
| H | -0.91446 | 1.61629  | -2.82970 |
| H | -2.49420 | 1.43756  | -2.04898 |
| H | 0.76415  | 3.23683  | 0.19585  |
| H | 1.06259  | 2.69419  | -1.46393 |
| H | 0.00308  | 4.08189  | -1.16106 |
| H | -0.32430 | 1.48882  | 1.77244  |
| C | 1.45625  | 0.69056  | 1.43100  |
| O | 1.95145  | 1.23226  | 2.42514  |
| C | 3.92600  | -1.90129 | -0.94105 |
| C | 2.60294  | -2.26638 | -0.68332 |
| C | 1.77749  | -1.42537 | 0.06319  |
| C | 2.27639  | -0.21547 | 0.56453  |
| C | 3.61177  | 0.13314  | 0.32571  |
| C | 4.42941  | -0.69923 | -0.43561 |
| H | 4.56515  | -2.55334 | -1.52927 |
| H | 2.21265  | -3.20665 | -1.06153 |
| H | 0.75047  | -1.71212 | 0.26485  |
| H | 3.99479  | 1.06061  | 0.73876  |
| H | 5.45930  | -0.41510 | -0.63058 |

4p\_conformer-013

|   |          |         |          |
|---|----------|---------|----------|
| C | 0.70849  | 0.72843 | -0.64148 |
| C | 0.10339  | 1.31591 | -1.73368 |
| C | -0.42090 | 2.57475 | -1.31200 |
| C | -0.13060 | 2.72654 | 0.03113  |
| N | 0.56561  | 1.60094 | 0.41812  |

|   |          |          |          |
|---|----------|----------|----------|
| H | -0.96482 | 3.28870  | -1.91682 |
| C | -0.45152 | 3.82411  | 0.99240  |
| H | 0.88126  | 1.41629  | 1.35946  |
| H | -1.06443 | 3.46800  | 1.83070  |
| H | 0.45298  | 4.27625  | 1.41964  |
| H | -1.01030 | 4.61318  | 0.48180  |
| C | 1.39524  | -0.60156 | -0.51196 |
| H | 0.02865  | 0.87405  | -2.71873 |
| N | 1.10906  | -1.23907 | 0.78731  |
| H | 1.00478  | -1.23695 | -1.31301 |
| C | 2.93150  | -0.53588 | -0.72855 |
| C | 3.65928  | 0.35820  | 0.28326  |
| C | 3.54513  | -1.94109 | -0.78342 |
| H | 3.04506  | -0.07723 | -1.71850 |
| H | 4.60136  | -1.88469 | -1.06735 |
| H | 3.49221  | -2.44668 | 0.18771  |
| H | 3.02814  | -2.57030 | -1.51684 |
| H | 4.72233  | 0.42129  | 0.02855  |
| H | 3.25081  | 1.37296  | 0.28799  |
| H | 3.59904  | -0.03613 | 1.30558  |
| H | 1.88366  | -1.32982 | 1.43410  |
| C | -0.10513 | -1.32542 | 1.40753  |
| O | -0.19207 | -1.51509 | 2.62403  |
| C | -3.66209 | -0.92044 | -0.96026 |
| C | -2.66797 | -1.81461 | -1.36385 |
| C | -1.49980 | -1.94532 | -0.61351 |
| C | -1.32792 | -1.19119 | 0.55284  |
| C | -2.34120 | -0.32248 | 0.97363  |
| C | -3.49705 | -0.17443 | 0.20990  |
| H | -4.56544 | -0.80883 | -1.55286 |
| H | -2.80074 | -2.40793 | -2.26372 |
| H | -0.72808 | -2.64211 | -0.92585 |
| H | -2.20492 | 0.24656  | 1.88761  |
| H | -4.27082 | 0.51794  | 0.52831  |

#### 4p\_conformer-014

|   |          |         |          |
|---|----------|---------|----------|
| C | -0.87518 | 0.44246 | 0.47926  |
| C | -0.46293 | 1.15407 | 1.58802  |
| C | -0.15625 | 2.48088 | 1.16139  |
| C | -0.38176 | 2.55037 | -0.20089 |
| N | -0.82923 | 1.30772 | -0.59507 |
| H | 0.20412  | 3.29537 | 1.77622  |
| C | -0.20967 | 3.67086 | -1.17370 |
| H | -1.04538 | 1.05141 | -1.54755 |
| H | 0.15893  | 4.56000 | -0.65496 |

|   |          |          |          |
|---|----------|----------|----------|
| H | 0.51102  | 3.41996  | -1.96293 |
| H | -1.15324 | 3.93725  | -1.66745 |
| C | -1.28517 | -0.99561 | 0.34002  |
| H | -0.36876 | 0.75081  | 2.58758  |
| N | -0.75113 | -1.59641 | -0.89822 |
| H | -0.87166 | -1.52878 | 1.20211  |
| C | -2.82068 | -1.23230 | 0.37394  |
| C | -3.37087 | -0.91282 | 1.76687  |
| C | -3.58139 | -0.44855 | -0.70294 |
| H | -2.96165 | -2.30694 | 0.18976  |
| H | -4.64209 | -0.71944 | -0.68473 |
| H | -3.50484 | 0.62940  | -0.52588 |
| H | -3.21136 | -0.64945 | -1.71524 |
| H | -4.44460 | -1.12300 | 1.81162  |
| H | -2.87419 | -1.51158 | 2.53888  |
| H | -3.21881 | 0.14458  | 2.00946  |
| H | -1.42805 | -1.91070 | -1.58384 |
| C | 0.50433  | -1.44916 | -1.41420 |
| O | 0.74225  | -1.67920 | -2.60344 |
| C | 3.66699  | -0.18916 | 1.19983  |
| C | 2.86475  | -1.27283 | 1.56441  |
| C | 1.82169  | -1.67966 | 0.73310  |
| C | 1.58797  | -1.01388 | -0.47552 |
| C | 2.41648  | 0.04773  | -0.85527 |
| C | 3.44115  | 0.47072  | -0.01112 |
| H | 4.46984  | 0.13699  | 1.85464  |
| H | 3.04820  | -1.79792 | 2.49719  |
| H | 1.19691  | -2.52120 | 1.01658  |
| H | 2.23663  | 0.54841  | -1.80123 |
| H | 4.06680  | 1.31056  | -0.29880 |

#### 4p\_conformer-015

|   |          |          |          |
|---|----------|----------|----------|
| C | -1.39634 | -0.20997 | -0.37381 |
| C | -1.82618 | -0.98033 | -1.43849 |
| C | -2.63958 | -2.02844 | -0.91103 |
| C | -2.68477 | -1.88072 | 0.46288  |
| N | -1.93080 | -0.76762 | 0.76773  |
| H | -3.13245 | -2.81266 | -1.47100 |
| C | -3.35954 | -2.69140 | 1.52121  |
| H | -1.71887 | -0.44520 | 1.70130  |
| H | -2.64218 | -3.10565 | 2.24164  |
| H | -4.08765 | -2.09985 | 2.09125  |
| H | -3.89400 | -3.52833 | 1.06349  |
| C | -0.53904 | 1.02725  | -0.32155 |
| H | -1.57424 | -0.81170 | -2.47686 |

|   |          |          |          |
|---|----------|----------|----------|
| N | 0.10721  | 1.17754  | 0.99234  |
| H | 0.25442  | 0.92238  | -1.06688 |
| C | -1.30947 | 2.33649  | -0.65992 |
| C | -1.71881 | 2.36122  | -2.13580 |
| C | -2.52958 | 2.55774  | 0.24243  |
| H | -0.59266 | 3.15165  | -0.49077 |
| H | -2.27378 | 2.58138  | 1.30860  |
| H | -3.00511 | 3.51494  | 0.00442  |
| H | -3.26947 | 1.76401  | 0.09381  |
| H | -2.18648 | 3.32003  | -2.38381 |
| H | -2.43919 | 1.56601  | -2.35418 |
| H | -0.85211 | 2.22574  | -2.79313 |
| H | -0.33276 | 1.83033  | 1.63161  |
| C | 1.42330  | 0.97718  | 1.31126  |
| O | 1.91213  | 1.51031  | 2.31214  |
| C | 3.94562  | -1.55777 | -1.06994 |
| C | 2.61022  | -1.91642 | -0.87877 |
| C | 1.76325  | -1.09762 | -0.13114 |
| C | 2.25278  | 0.08540  | 0.43869  |
| C | 3.60147  | 0.42690  | 0.26467  |
| C | 4.44045  | -0.38263 | -0.49673 |
| H | 4.60088  | -2.19350 | -1.65833 |
| H | 2.22465  | -2.83555 | -1.31006 |
| H | 0.72931  | -1.38682 | 0.01630  |
| H | 3.97716  | 1.33201  | 0.73020  |
| H | 5.47997  | -0.10238 | -0.63903 |

#### 4p\_conformer-016

|   |          |          |          |
|---|----------|----------|----------|
| C | -1.61765 | -0.24107 | -0.20416 |
| C | -1.76770 | -1.42367 | -0.90204 |
| C | -3.03572 | -1.97754 | -0.55092 |
| C | -3.63396 | -1.12243 | 0.35481  |
| N | -2.76138 | -0.07186 | 0.55110  |
| H | -3.46674 | -2.90082 | -0.91538 |
| C | -4.94816 | -1.19821 | 1.06163  |
| H | -2.94191 | 0.70586  | 1.16977  |
| H | -5.48379 | -2.10021 | 0.75356  |
| H | -4.82680 | -1.23608 | 2.15199  |
| H | -5.58670 | -0.33460 | 0.83508  |
| C | -0.49636 | 0.75412  | -0.21194 |
| H | -1.04459 | -1.83314 | -1.59526 |
| N | 0.13954  | 0.86931  | 1.11505  |
| H | 0.26251  | 0.37154  | -0.89692 |
| C | -0.91155 | 2.15939  | -0.72238 |
| C | 0.30057  | 3.09654  | -0.78514 |

|   |          |          |          |
|---|----------|----------|----------|
| C | -1.59411 | 2.05724  | -2.09110 |
| H | -1.63699 | 2.57775  | -0.00805 |
| H | -1.87804 | 3.05244  | -2.44952 |
| H | -0.91366 | 1.61542  | -2.82993 |
| H | -2.49358 | 1.43681  | -2.04955 |
| H | 0.00361  | 4.08120  | -1.16155 |
| H | 0.76424  | 3.23640  | 0.19576  |
| H | 1.06313  | 2.69338  | -1.46381 |
| H | -0.32456 | 1.48835  | 1.77252  |
| C | 1.45624  | 0.69058  | 1.43107  |
| O | 1.95136  | 1.23247  | 2.42515  |
| C | 3.92633  | -1.90100 | -0.94093 |
| C | 2.60343  | -2.26643 | -0.68285 |
| C | 1.77789  | -1.42552 | 0.06366  |
| C | 2.27653  | -0.21537 | 0.56466  |
| C | 3.61176  | 0.13359  | 0.32549  |
| C | 4.42948  | -0.69869 | -0.43583 |
| H | 4.56555  | -2.55298 | -1.52915 |
| H | 2.21334  | -3.20690 | -1.06079 |
| H | 0.75099  | -1.71252 | 0.26560  |
| H | 3.99459  | 1.06126  | 0.73826  |
| H | 5.45925  | -0.41429 | -0.63108 |

4p\_conformer-017

|   |          |          |          |
|---|----------|----------|----------|
| C | -1.61784 | -0.24129 | -0.20404 |
| C | -1.76775 | -1.42442 | -0.90106 |
| C | -3.03602 | -1.97780 | -0.55010 |
| C | -3.63457 | -1.12186 | 0.35465  |
| N | -2.76191 | -0.07129 | 0.55054  |
| H | -3.46702 | -2.90131 | -0.91402 |
| C | -4.94914 | -1.19683 | 1.06086  |
| H | -2.94270 | 0.70709  | 1.16830  |
| H | -4.82835 | -1.23386 | 2.15131  |
| H | -5.58740 | -0.33328 | 0.83331  |
| H | -5.48480 | -2.09897 | 0.75324  |
| C | -0.49635 | 0.75367  | -0.21192 |
| H | -1.04437 | -1.83457 | -1.59359 |
| N | 0.13945  | 0.86895  | 1.11511  |
| H | 0.26252  | 0.37082  | -0.89674 |
| C | -0.91127 | 2.15889  | -0.72268 |
| C | 0.30092  | 3.09597  | -0.78518 |
| C | -1.59340 | 2.05658  | -2.09161 |
| H | -1.63691 | 2.57741  | -0.00866 |
| H | -0.91272 | 1.61468  | -2.83017 |
| H | -2.49288 | 1.43614  | -2.05025 |



|   |          |          |          |
|---|----------|----------|----------|
| H | -1.87725 | 3.05173  | -2.45024 |
| H | 0.00413  | 4.08059  | -1.16186 |
| H | 0.76425  | 3.23598  | 0.19586  |
| H | 1.06370  | 2.69267  | -1.46351 |
| H | -0.32484 | 1.48778  | 1.77263  |
| C | 1.45619  | 0.69051  | 1.43115  |
| O | 1.95119  | 1.23251  | 2.42523  |
| C | 3.92674  | -1.90065 | -0.94083 |
| C | 2.60398  | -2.26642 | -0.68254 |
| C | 1.77830  | -1.42565 | 0.06397  |
| C | 2.27667  | -0.21530 | 0.56476  |
| C | 3.61177  | 0.13400  | 0.32541  |
| C | 4.42963  | -0.69815 | -0.43592 |
| H | 4.56607  | -2.55252 | -1.52906 |
| H | 2.21410  | -3.20704 | -1.06032 |
| H | 0.75151  | -1.71290 | 0.26609  |
| H | 3.99439  | 1.06183  | 0.73802  |
| H | 5.45929  | -0.41349 | -0.63132 |

#### 4p\_conformer-018

|   |          |          |          |
|---|----------|----------|----------|
| C | 1.84545  | -0.53212 | -0.10875 |
| C | 2.37286  | -1.79048 | -0.31949 |
| C | 3.77276  | -1.64539 | -0.55013 |
| C | 4.07485  | -0.29875 | -0.48181 |
| N | 2.89594  | 0.36442  | -0.21291 |
| H | 4.48544  | -2.43475 | -0.74991 |
| C | 5.36910  | 0.43036  | -0.64205 |
| H | 2.83024  | 1.36300  | -0.08095 |
| H | 6.17225  | -0.28126 | -0.85148 |
| H | 5.33449  | 1.15110  | -1.46911 |
| H | 5.64147  | 0.98708  | 0.26393  |
| C | 0.43038  | -0.13101 | 0.17153  |
| H | 1.80407  | -2.71111 | -0.30989 |
| N | -0.05461 | 0.76466  | -0.90236 |
| H | -0.15015 | -1.05324 | 0.12011  |
| C | 0.17250  | 0.46877  | 1.58343  |
| C | 0.53697  | -0.54983 | 2.66699  |
| C | 0.86278  | 1.81469  | 1.82739  |
| H | -0.91166 | 0.63800  | 1.62789  |
| H | 1.94887  | 1.69803  | 1.91428  |
| H | 0.64911  | 2.53394  | 1.02880  |
| H | 0.50960  | 2.25294  | 2.76684  |
| H | 0.01401  | -1.50073 | 2.51102  |
| H | 1.61328  | -0.75490 | 2.66555  |
| H | 0.26361  | -0.17145 | 3.65793  |

|   |          |          |          |
|---|----------|----------|----------|
| H | 0.61982  | 1.42638  | -1.27054 |
| C | -1.34153 | 1.17435  | -1.10828 |
| O | -1.59419 | 2.22703  | -1.70190 |
| C | -4.59879 | -1.30785 | 0.19039  |
| C | -3.52716 | -1.88559 | -0.49374 |
| C | -2.45049 | -1.09714 | -0.90009 |
| C | -2.44586 | 0.27816  | -0.63318 |
| C | -3.53724 | 0.85774  | 0.02573  |
| C | -4.60267 | 0.06546  | 0.44917  |
| H | -5.43202 | -1.92433 | 0.51468  |
| H | -3.52976 | -2.94899 | -0.71358 |
| H | -1.62635 | -1.54431 | -1.44742 |
| H | -3.53752 | 1.92788  | 0.20689  |
| H | -5.43812 | 0.51865  | 0.97447  |

4p\_conformer-019

|   |          |          |          |
|---|----------|----------|----------|
| C | -1.91662 | 0.17316  | -0.23786 |
| C | -3.05789 | 0.74728  | -0.76890 |
| C | -4.11452 | -0.20647 | -0.66214 |
| C | -3.60312 | -1.34359 | -0.06646 |
| N | -2.27044 | -1.09796 | 0.17511  |
| H | -5.14042 | -0.07332 | -0.97990 |
| C | -4.25071 | -2.63657 | 0.31006  |
| H | -1.64025 | -1.72239 | 0.65869  |
| H | -5.30567 | -2.62123 | 0.02307  |
| H | -3.77909 | -3.49282 | -0.18906 |
| H | -4.19982 | -2.82191 | 1.39087  |
| C | -0.47975 | 0.60500  | -0.10737 |
| H | -3.13789 | 1.73659  | -1.19304 |
| N | 0.01042  | 0.13685  | 1.20760  |
| H | 0.11324  | 0.07466  | -0.85807 |
| C | -0.18180 | 2.11229  | -0.31209 |
| C | -0.35028 | 2.53870  | -1.77650 |
| C | -0.94145 | 3.02844  | 0.65352  |
| H | 0.88854  | 2.20419  | -0.08044 |
| H | -0.75356 | 2.75487  | 1.69789  |
| H | -0.61571 | 4.06598  | 0.52231  |
| H | -2.02127 | 2.98799  | 0.48474  |
| H | 0.03626  | 3.55391  | -1.91814 |
| H | 0.20605  | 1.87117  | -2.44508 |
| H | -1.39597 | 2.53489  | -2.09468 |
| H | -0.55370 | 0.43618  | 1.99747  |
| C | 1.32383  | -0.03994 | 1.56025  |
| O | 1.69424  | 0.09098  | 2.72910  |
| C | 4.20430  | -1.22962 | -1.39569 |

|   |         |          |          |
|---|---------|----------|----------|
| C | 2.95350 | -1.85073 | -1.37146 |
| C | 1.99672 | -1.45878 | -0.43563 |
| C | 2.29091 | -0.44932 | 0.49110  |
| C | 3.55645 | 0.14994  | 0.48048  |
| C | 4.50443 | -0.22833 | -0.46855 |
| H | 4.94532 | -1.52953 | -2.13080 |
| H | 2.72295 | -2.64142 | -2.07908 |
| H | 1.03034 | -1.95269 | -0.41029 |
| H | 3.78466 | 0.91395  | 1.21667  |
| H | 5.47821 | 0.25210  | -0.48131 |

4p\_conformer-020

|   |          |          |          |
|---|----------|----------|----------|
| C | -1.84529 | 0.53219  | -0.10796 |
| C | -2.37247 | 1.79094  | -0.31691 |
| C | -3.77236 | 1.64643  | -0.54798 |
| C | -4.07467 | 0.29973  | -0.48173 |
| N | -2.89591 | -0.36402 | -0.21363 |
| H | -4.48488 | 2.43619  | -0.74669 |
| C | -5.36900 | -0.42895 | -0.64333 |
| H | -2.83041 | -1.36281 | -0.08312 |
| H | -5.64144 | -0.98729 | 0.26163  |
| H | -6.17207 | 0.28313  | -0.85148 |
| H | -5.33444 | -1.14819 | -1.47170 |
| C | -0.43032 | 0.13044  | 0.17195  |
| H | -1.80353 | 2.71147  | -0.30584 |
| N | 0.05464  | -0.76393 | -0.90304 |
| H | 0.15040  | 1.05261  | 0.12177  |
| C | -0.17268 | -0.47121 | 1.58310  |
| C | -0.53721 | 0.54602  | 2.66793  |
| C | -0.86309 | -1.81739 | 1.82520  |
| H | 0.91147  | -0.64058 | 1.62746  |
| H | -1.94919 | -1.70079 | 1.91191  |
| H | -0.64922 | -2.53566 | 1.02578  |
| H | -0.51019 | -2.25683 | 2.76420  |
| H | -0.26406 | 0.16631  | 3.65842  |
| H | -0.01411 | 1.49706  | 2.51330  |
| H | -1.61349 | 0.75121  | 2.66657  |
| H | -0.61972 | -1.42541 | -1.27178 |
| C | 1.34161  | -1.17325 | -1.10944 |
| O | 1.59440  | -2.22528 | -1.70415 |
| C | 4.59856  | 1.30813  | 0.19159  |
| C | 3.52689  | 1.88636  | -0.49208 |
| C | 2.45032  | 1.09816  | -0.89916 |
| C | 2.44583  | -0.27738 | -0.63347 |
| C | 3.53724  | -0.85743 | 0.02496  |

|   |         |          |          |
|---|---------|----------|----------|
| C | 4.60257 | -0.06541 | 0.44915  |
| H | 5.43171 | 1.92441  | 0.51645  |
| H | 3.52939 | 2.94996  | -0.71098 |
| H | 1.62614 | 1.54571  | -1.44612 |
| H | 3.53762 | -1.92773 | 0.20518  |
| H | 5.43804 | -0.51897 | 0.97409  |

4p\_conformer-021

|   |          |          |          |
|---|----------|----------|----------|
| C | -1.45763 | -0.21570 | 0.09863  |
| C | -1.59588 | -0.98136 | 1.24093  |
| C | -2.58581 | -1.97639 | 0.97560  |
| C | -3.02968 | -1.79994 | -0.32022 |
| N | -2.33576 | -0.72417 | -0.83715 |
| H | -2.93797 | -2.73965 | 1.65724  |
| C | -4.04585 | -2.54312 | -1.12480 |
| H | -2.44230 | -0.37734 | -1.77972 |
| H | -4.87283 | -1.89499 | -1.44290 |
| H | -3.61090 | -2.98357 | -2.03141 |
| H | -4.46887 | -3.35604 | -0.52835 |
| C | -0.55223 | 0.94984  | -0.20336 |
| H | -1.04357 | -0.84366 | 2.16004  |
| N | 0.24295  | 1.27973  | 0.98598  |
| H | 0.15084  | 0.66122  | -0.98973 |
| C | -1.30873 | 2.20291  | -0.71368 |
| C | -2.29763 | 2.75574  | 0.31955  |
| C | -0.32620 | 3.27855  | -1.18705 |
| H | -1.88815 | 1.86923  | -1.58507 |
| H | -0.86443 | 4.14253  | -1.59141 |
| H | 0.29896  | 3.62555  | -0.35724 |
| H | 0.33528  | 2.89489  | -1.97264 |
| H | -2.90418 | 3.55205  | -0.12400 |
| H | -2.97203 | 1.97484  | 0.68571  |
| H | -1.77648 | 3.19045  | 1.18148  |
| H | -0.30584 | 1.63757  | 1.76211  |
| C | 1.30287  | 0.53879  | 1.44379  |
| O | 1.54822  | 0.45395  | 2.64984  |
| C | 3.92011  | -1.39402 | -1.35614 |
| C | 3.49124  | -0.08910 | -1.60891 |
| C | 2.62084  | 0.54430  | -0.72186 |
| C | 2.18451  | -0.12243 | 0.43089  |
| C | 2.63854  | -1.42055 | 0.69330  |
| C | 3.49226  | -2.05927 | -0.20389 |
| H | 4.59074  | -1.88951 | -2.05206 |
| H | 3.83517  | 0.43646  | -2.49473 |
| H | 2.29774  | 1.56334  | -0.90986 |

|   |         |          |          |
|---|---------|----------|----------|
| H | 2.31031 | -1.92095 | 1.59860  |
| H | 3.82816 | -3.07229 | -0.00327 |

4p\_conformer-022

|   |          |          |          |
|---|----------|----------|----------|
| C | -1.98161 | 0.30177  | -0.12346 |
| C | -3.18539 | 0.93309  | -0.37578 |
| C | -4.21601 | -0.05221 | -0.30460 |
| C | -3.62487 | -1.26408 | -0.00260 |
| N | -2.27010 | -1.03250 | 0.09313  |
| H | -5.27552 | 0.10579  | -0.45820 |
| C | -4.21189 | -2.62172 | 0.20931  |
| H | -1.59353 | -1.71291 | 0.40871  |
| H | -3.82093 | -3.35485 | -0.50787 |
| H | -4.00204 | -3.00718 | 1.21551  |
| H | -5.29766 | -2.58001 | 0.08750  |
| C | -0.56163 | 0.79337  | -0.04051 |
| H | -3.31672 | 1.98299  | -0.59590 |
| N | -0.01250 | 0.37300  | 1.26258  |
| H | 0.04700  | 0.29503  | -0.80062 |
| C | -0.43533 | 2.31859  | -0.29249 |
| C | 0.92953  | 2.86226  | 0.14636  |
| C | -0.66093 | 2.62534  | -1.78123 |
| H | -1.21228 | 2.82123  | 0.29902  |
| H | 0.14741  | 2.19022  | -2.38258 |
| H | -1.60720 | 2.22180  | -2.14915 |
| H | -0.65922 | 3.70694  | -1.95375 |
| H | 1.00207  | 3.92739  | -0.09831 |
| H | 1.09269  | 2.75396  | 1.22233  |
| H | 1.74457  | 2.34430  | -0.37348 |
| H | -0.50975 | 0.74047  | 2.06870  |
| C | 1.27770  | 0.03472  | 1.56359  |
| O | 1.71402  | 0.15301  | 2.71248  |
| C | 3.89584  | -1.59126 | -1.43309 |
| C | 2.57504  | -2.03938 | -1.36825 |
| C | 1.70145  | -1.50588 | -0.42064 |
| C | 2.14610  | -0.52665 | 0.47725  |
| C | 3.48016  | -0.10255 | 0.42529  |
| C | 4.34705  | -0.62089 | -0.53448 |
| H | 4.57279  | -2.00066 | -2.17707 |
| H | 2.22379  | -2.80534 | -2.05301 |
| H | 0.68006  | -1.86861 | -0.37102 |
| H | 3.82404  | 0.63860  | 1.13933  |
| H | 5.37510  | -0.27381 | -0.57792 |

4p\_conformer-023

|   |          |          |          |
|---|----------|----------|----------|
| C | 0.33126  | -1.30090 | -0.12318 |
| C | -0.19417 | -1.31053 | -1.40042 |
| C | -1.49373 | -1.89257 | -1.33070 |
| C | -1.74027 | -2.22484 | -0.01176 |
| N | -0.61722 | -1.87199 | 0.70307  |
| H | -2.18158 | -2.04438 | -2.15224 |
| C | -2.93489 | -2.83709 | 0.64346  |
| H | -0.51966 | -1.96778 | 1.70400  |
| H | -3.70481 | -3.04250 | -0.10526 |
| H | -2.69239 | -3.78319 | 1.14446  |
| H | -3.37158 | -2.17112 | 1.39920  |
| C | 1.61556  | -0.77223 | 0.44985  |
| H | 0.28758  | -0.91657 | -2.28381 |
| N | 1.35123  | 0.19201  | 1.54900  |
| H | 2.13326  | -1.59371 | 0.96515  |
| C | 2.59806  | -0.25476 | -0.62933 |
| C | 3.72862  | 0.57280  | -0.01021 |
| C | 3.17854  | -1.43484 | -1.42235 |
| H | 2.03765  | 0.38682  | -1.31878 |
| H | 3.82453  | -1.07198 | -2.22911 |
| H | 3.78755  | -2.07240 | -0.76872 |
| H | 2.39546  | -2.05618 | -1.86432 |
| H | 4.42542  | 0.90200  | -0.78861 |
| H | 3.34842  | 1.45836  | 0.50698  |
| H | 4.29641  | -0.02214 | 0.71693  |
| H | 1.85027  | 0.01223  | 2.41239  |
| C | 0.29424  | 1.03422  | 1.73468  |
| O | 0.01088  | 1.45892  | 2.86017  |
| C | -2.04103 | 2.40408  | -1.59502 |
| C | -0.65905 | 2.60561  | -1.59229 |
| C | 0.11292  | 2.13517  | -0.53035 |
| C | -0.49586 | 1.46876  | 0.53867  |
| C | -1.88493 | 1.30196  | 0.55100  |
| C | -2.65253 | 1.75225  | -0.52085 |
| H | -2.64089 | 2.76021  | -2.42763 |
| H | -0.18208 | 3.12857  | -2.41617 |
| H | 1.18515  | 2.29975  | -0.52271 |
| H | -2.35264 | 0.80151  | 1.39271  |
| H | -3.72773 | 1.59844  | -0.51764 |

4p\_conformer-024

|   |          |          |          |
|---|----------|----------|----------|
| C | -1.81299 | 0.07322  | -0.41514 |
| C | -2.85585 | 0.08336  | -1.32246 |
| C | -3.77367 | -0.93909 | -0.93342 |

|   |          |          |          |
|---|----------|----------|----------|
| C | -3.27574 | -1.54988 | 0.20243  |
| N | -2.08129 | -0.92736 | 0.49490  |
| H | -4.70179 | -1.19908 | -1.42601 |
| C | -3.81805 | -2.65688 | 1.04699  |
| H | -1.50381 | -1.10871 | 1.30411  |
| H | -4.76408 | -3.01272 | 0.62975  |
| H | -3.13047 | -3.51115 | 1.09610  |
| H | -4.00799 | -2.33308 | 2.07870  |
| C | -0.52979 | 0.85845  | -0.34614 |
| H | -2.94649 | 0.74253  | -2.17523 |
| N | 0.02996  | 0.78981  | 1.01144  |
| H | 0.21187  | 0.39268  | -1.00102 |
| C | -0.68351 | 2.32231  | -0.83208 |
| C | -1.64825 | 3.14408  | 0.03013  |
| C | 0.68765  | 2.99919  | -0.93632 |
| H | -1.10680 | 2.25175  | -1.84265 |
| H | 1.14517  | 3.11721  | 0.05274  |
| H | 1.37641  | 2.41573  | -1.55826 |
| H | 0.59168  | 3.99633  | -1.37879 |
| H | -1.80289 | 4.13350  | -0.41297 |
| H | -2.62138 | 2.65195  | 0.11860  |
| H | -1.24883 | 3.30468  | 1.03955  |
| H | -0.43226 | 1.37313  | 1.70205  |
| C | 1.33244  | 0.53260  | 1.35345  |
| O | 1.80999  | 0.97040  | 2.40303  |
| C | 3.78395  | -1.97858 | -1.12275 |
| C | 4.31640  | -0.84527 | -0.50220 |
| C | 3.50316  | -0.03818 | 0.29035  |
| C | 2.14466  | -0.34111 | 0.44712  |
| C | 1.61619  | -1.48285 | -0.17173 |
| C | 2.43604  | -2.30014 | -0.94944 |
| H | 4.41904  | -2.61190 | -1.73519 |
| H | 5.36516  | -0.59513 | -0.63172 |
| H | 3.90780  | 0.83498  | 0.79150  |
| H | 0.57123  | -1.74245 | -0.03470 |
| H | 2.02206  | -3.18802 | -1.41781 |

4p\_conformer-025

|   |          |         |          |
|---|----------|---------|----------|
| C | 0.83493  | 0.70638 | 0.17258  |
| C | 0.89474  | 1.14190 | 1.48506  |
| C | -0.05757 | 2.19251 | 1.63404  |
| C | -0.68392 | 2.37530 | 0.41367  |
| N | -0.11431 | 1.48063 | -0.46166 |
| H | -0.26809 | 2.75540 | 2.53426  |
| C | -1.78596 | 3.29143 | -0.00585 |

|   |          |          |          |
|---|----------|----------|----------|
| H | -0.46192 | 1.29703  | -1.39258 |
| H | -1.48146 | 3.96048  | -0.82094 |
| H | -2.66269 | 2.72887  | -0.35304 |
| H | -2.09786 | 3.91200  | 0.83870  |
| C | 1.50428  | -0.43029 | -0.55147 |
| H | 1.53369  | 0.73317  | 2.25548  |
| N | 1.27206  | -1.72365 | 0.12721  |
| H | 1.05460  | -0.48940 | -1.54849 |
| C | 3.02553  | -0.25012 | -0.78743 |
| C | 3.26547  | 0.94042  | -1.72156 |
| C | 3.84414  | -0.09533 | 0.50001  |
| H | 3.35649  | -1.16346 | -1.30152 |
| H | 4.91231  | -0.06896 | 0.26043  |
| H | 3.58740  | 0.83791  | 1.01054  |
| H | 3.68852  | -0.91796 | 1.20755  |
| H | 4.33202  | 1.04126  | -1.94812 |
| H | 2.72634  | 0.82225  | -2.66847 |
| H | 2.92865  | 1.87243  | -1.25369 |
| H | 2.07171  | -2.14270 | 0.58814  |
| C | 0.08093  | -2.12261 | 0.66381  |
| O | 0.01996  | -2.96505 | 1.56261  |
| C | -3.46543 | -0.30092 | -0.93756 |
| C | -2.55407 | -0.91186 | -1.80304 |
| C | -1.39973 | -1.50699 | -1.29387 |
| C | -1.15671 | -1.50276 | 0.08528  |
| C | -2.09023 | -0.92477 | 0.95131  |
| C | -3.23270 | -0.31189 | 0.44018  |
| H | -4.35728 | 0.17491  | -1.33472 |
| H | -2.74101 | -0.92348 | -2.87281 |
| H | -0.68874 | -1.97873 | -1.96565 |
| H | -1.89745 | -0.93031 | 2.01891  |
| H | -3.94135 | 0.15850  | 1.11535  |

#### 4p\_conformer-026

|   |          |          |          |
|---|----------|----------|----------|
| C | -1.61363 | -0.12072 | 0.20516  |
| C | -1.91280 | -0.62854 | 1.45440  |
| C | -3.08573 | -1.43355 | 1.32394  |
| C | -3.47709 | -1.40213 | -0.00019 |
| N | -2.57320 | -0.59787 | -0.66506 |
| H | -3.59138 | -1.97716 | 2.11135  |
| C | -4.61971 | -2.05525 | -0.70742 |
| H | -2.60325 | -0.40721 | -1.65640 |
| H | -5.21114 | -2.63872 | 0.00344  |
| H | -5.28730 | -1.32044 | -1.17588 |
| H | -4.27929 | -2.73594 | -1.49858 |



|   |          |          |          |
|---|----------|----------|----------|
| C | -0.49684 | 0.77691  | -0.25384 |
| H | -1.34756 | -0.43455 | 2.35514  |
| N | 0.32850  | 1.17159  | 0.88594  |
| H | 0.15614  | 0.22524  | -0.93732 |
| C | -0.99554 | 2.02461  | -1.03621 |
| C | -1.92634 | 2.91479  | -0.20523 |
| C | 0.18738  | 2.81505  | -1.60458 |
| H | -1.57533 | 1.63351  | -1.88333 |
| H | -0.16661 | 3.63327  | -2.24062 |
| H | 0.79176  | 3.25167  | -0.80168 |
| H | 0.84145  | 2.17393  | -2.20704 |
| H | -2.34040 | 3.71483  | -0.82761 |
| H | -2.75835 | 2.34133  | 0.21540  |
| H | -1.39202 | 3.39792  | 0.62249  |
| H | -0.03349 | 1.92260  | 1.46262  |
| C | 1.65950  | 0.94925  | 1.08660  |
| O | 2.30703  | 1.64612  | 1.87491  |
| C | 3.66216  | -2.29798 | -0.88607 |
| C | 2.35941  | -2.48284 | -0.41832 |
| C | 1.68095  | -1.43209 | 0.19954  |
| C | 2.30928  | -0.18915 | 0.36018  |
| C | 3.62542  | -0.01723 | -0.08741 |
| C | 4.29444  | -1.06245 | -0.72038 |
| H | 4.18596  | -3.11544 | -1.37300 |
| H | 1.87089  | -3.44614 | -0.53174 |
| H | 0.67115  | -1.57960 | 0.57068  |
| H | 4.11106  | 0.94119  | 0.06445  |
| H | 5.30929  | -0.91737 | -1.07880 |

4p\_conformer-027

|   |          |          |          |
|---|----------|----------|----------|
| C | -1.56973 | 0.14545  | 0.35723  |
| C | -2.29709 | 0.08038  | 1.52951  |
| C | -3.23147 | -0.99085 | 1.39805  |
| C | -3.05613 | -1.55855 | 0.14969  |
| N | -2.04305 | -0.85547 | -0.46711 |
| H | -3.95009 | -1.32042 | 2.13721  |
| C | -3.73911 | -2.70851 | -0.51631 |
| H | -1.68902 | -1.05279 | -1.39258 |
| H | -3.03899 | -3.51848 | -0.75922 |
| H | -4.50663 | -3.11817 | 0.14602  |
| H | -4.22860 | -2.41025 | -1.45254 |
| C | -0.48318 | 1.08478  | -0.08870 |
| H | -2.16271 | 0.72589  | 2.38727  |
| N | 0.44898  | 1.37902  | 1.00706  |
| H | 0.09322  | 0.59707  | -0.88184 |

|   |          |          |          |
|---|----------|----------|----------|
| C | -1.02101 | 2.42254  | -0.66601 |
| C | 0.12717  | 3.28841  | -1.19883 |
| C | -2.06653 | 2.17662  | -1.75902 |
| H | -1.51440 | 2.95230  | 0.16250  |
| H | -1.63390 | 1.61058  | -2.59410 |
| H | -2.92687 | 1.61873  | -1.37948 |
| H | -2.42694 | 3.13101  | -2.15726 |
| H | -0.25702 | 4.23795  | -1.58649 |
| H | 0.86673  | 3.51364  | -0.42470 |
| H | 0.64502  | 2.77563  | -2.01948 |
| H | 0.22265  | 2.18512  | 1.57961  |
| C | 1.74497  | 0.97942  | 1.14522  |
| O | 2.52116  | 1.57905  | 1.89703  |
| C | 3.17205  | -2.48233 | -0.96013 |
| C | 1.90015  | -2.50835 | -0.38445 |
| C | 1.40980  | -1.38436 | 0.28055  |
| C | 2.19588  | -0.22858 | 0.38093  |
| C | 3.48217  | -0.21771 | -0.17356 |
| C | 3.96292  | -1.33458 | -0.85358 |
| H | 3.54933  | -3.35526 | -1.48491 |
| H | 1.28885  | -3.40358 | -0.45078 |
| H | 0.42572  | -1.40844 | 0.73601  |
| H | 4.09307  | 0.67310  | -0.06918 |
| H | 4.95475  | -1.31360 | -1.29549 |

#### 4p\_conformer-028

|   |          |          |          |
|---|----------|----------|----------|
| C | -1.61358 | -0.12066 | 0.20516  |
| C | -1.91288 | -0.62826 | 1.45447  |
| C | -3.08573 | -1.43339 | 1.32402  |
| C | -3.47691 | -1.40227 | -0.00017 |
| N | -2.57301 | -0.59806 | -0.66508 |
| H | -3.59144 | -1.97688 | 2.11147  |
| C | -4.61939 | -2.05562 | -0.70742 |
| H | -2.60292 | -0.40764 | -1.65647 |
| H | -5.21087 | -2.63899 | 0.00349  |
| H | -5.28698 | -1.32096 | -1.17613 |
| H | -4.27881 | -2.73645 | -1.49838 |
| C | -0.49684 | 0.77700  | -0.25388 |
| H | -1.34777 | -0.43404 | 2.35524  |
| N | 0.32853  | 1.17174  | 0.88585  |
| H | 0.15613  | 0.22535  | -0.93738 |
| C | -0.99562 | 2.02467  | -1.03624 |
| C | -1.92639 | 2.91484  | -0.20522 |
| C | 0.18724  | 2.81513  | -1.60470 |
| H | -1.57546 | 1.63354  | -1.88331 |

|   |          |          |          |
|---|----------|----------|----------|
| H | -0.16680 | 3.63334  | -2.24071 |
| H | 0.79167  | 3.25177  | -0.80183 |
| H | 0.84129  | 2.17402  | -2.20720 |
| H | -2.34053 | 3.71485  | -0.82758 |
| H | -2.75834 | 2.34137  | 0.21550  |
| H | -1.39202 | 3.39802  | 0.62245  |
| H | -0.03342 | 1.92279  | 1.46250  |
| C | 1.65951  | 0.94933  | 1.08654  |
| O | 2.30708  | 1.64619  | 1.87482  |
| C | 3.66202  | -2.29809 | -0.88597 |
| C | 2.35927  | -2.48288 | -0.41818 |
| C | 1.68087  | -1.43207 | 0.19963  |
| C | 2.30924  | -0.18914 | 0.36017  |
| C | 3.62538  | -0.01729 | -0.08745 |
| C | 4.29435  | -1.06258 | -0.72037 |
| H | 4.18579  | -3.11560 | -1.37286 |
| H | 1.87072  | -3.44618 | -0.53153 |
| H | 0.67107  | -1.57953 | 0.57080  |
| H | 4.11106  | 0.94112  | 0.06434  |
| H | 5.30919  | -0.91755 | -1.07882 |

4p\_conformer-029

|   |          |          |          |
|---|----------|----------|----------|
| C | -1.41680 | 0.02739  | -0.28180 |
| C | -1.92357 | 0.18829  | -1.55680 |
| C | -2.71413 | 1.37725  | -1.56050 |
| C | -2.67305 | 1.91987  | -0.29003 |
| N | -1.88221 | 1.08597  | 0.47267  |
| H | -3.25194 | 1.79688  | -2.40069 |
| C | -3.29988 | 3.15111  | 0.27860  |
| H | -1.64963 | 1.24627  | 1.44251  |
| H | -2.54992 | 3.85326  | 0.66542  |
| H | -3.87273 | 3.66755  | -0.49641 |
| H | -3.98527 | 2.91981  | 1.10434  |
| C | -0.52418 | -1.02933 | 0.31156  |
| H | -1.73158 | -0.47121 | -2.39207 |
| N | 0.36622  | -1.60665 | -0.69969 |
| H | 0.11474  | -0.55606 | 1.06435  |
| C | -1.29193 | -2.17435 | 1.03507  |
| C | -2.02992 | -1.64144 | 2.26844  |
| C | -2.26019 | -2.92294 | 0.11180  |
| H | -0.51823 | -2.87523 | 1.37641  |
| H | -3.02929 | -2.24527 | -0.27319 |
| H | -1.75875 | -3.38234 | -0.74819 |
| H | -2.75650 | -3.72923 | 0.66200  |
| H | -2.47243 | -2.46945 | 2.83210  |

|   |          |          |          |
|---|----------|----------|----------|
| H | -1.35209 | -1.10194 | 2.94070  |
| H | -2.84043 | -0.96239 | 1.98230  |
| H | 0.04607  | -2.44857 | -1.16311 |
| C | 1.69662  | -1.37587 | -0.88606 |
| O | 2.38828  | -2.15406 | -1.55215 |
| C | 3.57434  | 2.11529  | 0.77316  |
| C | 2.31734  | 2.23464  | 0.17736  |
| C | 1.67807  | 1.10890  | -0.34298 |
| C | 2.30057  | -0.14500 | -0.27780 |
| C | 3.57472  | -0.25403 | 0.29508  |
| C | 4.20267  | 0.86790  | 0.83131  |
| H | 4.06667  | 2.99150  | 1.18505  |
| H | 1.83276  | 3.20465  | 0.11509  |
| H | 0.70633  | 1.20451  | -0.81510 |
| H | 4.06062  | -1.22407 | 0.31788  |
| H | 5.18312  | 0.77244  | 1.28859  |

4p\_conformer-030

|   |          |          |          |
|---|----------|----------|----------|
| C | 1.57001  | -0.14550 | 0.35720  |
| C | 2.29759  | -0.08079 | 1.52937  |
| C | 3.23223  | 0.99023  | 1.39790  |
| C | 3.05681  | 1.55816  | 0.14966  |
| N | 2.04344  | 0.85544  | -0.46707 |
| H | 3.95105  | 1.31950  | 2.13699  |
| C | 3.73998  | 2.70804  | -0.51628 |
| H | 1.68934  | 1.05295  | -1.39247 |
| H | 3.04006  | 3.51829  | -0.75883 |
| H | 4.50781  | 3.11730  | 0.14592  |
| H | 4.22911  | 2.40981  | -1.45271 |
| C | 0.48318  | -1.08452 | -0.08867 |
| H | 2.16321  | -0.72640 | 2.38705  |
| N | -0.44890 | -1.37866 | 1.00720  |
| H | -0.09325 | -0.59659 | -0.88166 |
| C | 1.02061  | -2.42235 | -0.66620 |
| C | -0.12786 | -3.28791 | -1.19889 |
| C | 2.06597  | -2.17657 | -1.75940 |
| H | 1.51403  | -2.95229 | 0.16216  |
| H | 1.63329  | -1.61040 | -2.59436 |
| H | 2.92650  | -1.61888 | -1.37998 |
| H | 2.42612  | -3.13101 | -2.15775 |
| H | 0.25603  | -4.23750 | -1.58670 |
| H | -0.86732 | -3.51304 | -0.42463 |
| H | -0.64576 | -2.77494 | -2.01940 |
| H | -0.22243 | -2.18465 | 1.57986  |
| C | -1.74496 | -0.97925 | 1.14532  |

|   |          |          |          |
|---|----------|----------|----------|
| O | -2.52107 | -1.57896 | 1.89714  |
| C | -3.17252 | 2.48232  | -0.96000 |
| C | -1.90052 | 2.50842  | -0.38452 |
| C | -1.41002 | 1.38448  | 0.28044  |
| C | -2.19603 | 0.22867  | 0.38100  |
| C | -3.48241 | 0.21772  | -0.17329 |
| C | -3.96332 | 1.33454  | -0.85327 |
| H | -3.54992 | 3.35522  | -1.48475 |
| H | -1.28928 | 3.40368  | -0.45099 |
| H | -0.42586 | 1.40862  | 0.73575  |
| H | -4.09325 | -0.67312 | -0.06876 |
| H | -4.95522 | 1.31349  | -1.29502 |

4p\_conformer-031

|   |          |          |          |
|---|----------|----------|----------|
| C | -1.94631 | -0.12756 | -0.17785 |
| C | -2.87456 | -1.07472 | -0.57392 |
| C | -4.13993 | -0.42337 | -0.67252 |
| C | -3.96308 | 0.90461  | -0.33121 |
| N | -2.62641 | 1.06423  | -0.03877 |
| H | -5.08058 | -0.87398 | -0.96093 |
| C | -4.93074 | 2.04055  | -0.25477 |
| H | -2.20023 | 1.93630  | 0.24161  |
| H | -4.98611 | 2.46538  | 0.75584  |
| H | -4.66145 | 2.85716  | -0.93702 |
| H | -5.93139 | 1.69406  | -0.52692 |
| C | -0.47421 | -0.21628 | 0.10019  |
| H | -2.67069 | -2.11849 | -0.77248 |
| N | 0.18811  | -0.85551 | -1.05442 |
| H | -0.09262 | 0.80450  | 0.18261  |
| C | -0.12105 | -0.92850 | 1.43770  |
| C | -0.73714 | -0.17336 | 2.61897  |
| C | -0.50906 | -2.40900 | 1.45489  |
| H | 0.97178  | -0.86225 | 1.52444  |
| H | -1.59593 | -2.53060 | 1.39878  |
| H | -0.05844 | -2.95500 | 0.61889  |
| H | -0.16516 | -2.87787 | 2.38317  |
| H | -0.40705 | -0.60966 | 3.56783  |
| H | -0.44517 | 0.88387  | 2.61481  |
| H | -1.83146 | -0.22204 | 2.58704  |
| H | -0.35441 | -1.57798 | -1.51490 |
| C | 1.53192  | -1.01658 | -1.24067 |
| O | 1.97902  | -1.93550 | -1.93380 |
| C | 4.27489  | 1.80801  | 0.47779  |
| C | 3.12633  | 2.27343  | -0.16592 |
| C | 2.21365  | 1.36849  | -0.70828 |

|   |         |          |          |
|---|---------|----------|----------|
| C | 2.45153 | -0.00918 | -0.61865 |
| C | 3.62058 | -0.46949 | 0.00008  |
| C | 4.52131 | 0.43477  | 0.55940  |
| H | 4.98002 | 2.51313  | 0.90800  |
| H | 2.94181 | 3.34032  | -0.24893 |
| H | 1.33131 | 1.73218  | -1.22573 |
| H | 3.80937 | -1.53744 | 0.04268  |
| H | 5.41758 | 0.07040  | 1.05260  |

4p\_conformer-032

|   |          |          |          |
|---|----------|----------|----------|
| C | 1.33776  | 0.96994  | -0.22553 |
| C | 1.77246  | 0.47395  | -1.43871 |
| C | 2.94977  | -0.29520 | -1.19509 |
| C | 3.21687  | -0.24779 | 0.16041  |
| N | 2.23848  | 0.53998  | 0.72907  |
| H | 3.54101  | -0.82612 | -1.92963 |
| C | 4.30834  | -0.86522 | 0.97270  |
| H | 2.14190  | 0.72077  | 1.71878  |
| H | 4.96382  | -1.45479 | 0.32607  |
| H | 4.92436  | -0.10863 | 1.47555  |
| H | 3.91420  | -1.53285 | 1.74950  |
| C | 0.19559  | 1.85243  | 0.17750  |
| H | 1.29862  | 0.63668  | -2.39602 |
| N | -0.59195 | 1.30911  | 1.31818  |
| H | 0.64112  | 2.75122  | 0.62442  |
| C | -0.65925 | 2.37016  | -1.00647 |
| C | -1.50854 | 1.30867  | -1.71555 |
| C | -1.54606 | 3.53647  | -0.55265 |
| H | 0.07177  | 2.76118  | -1.72656 |
| H | -0.95489 | 4.34060  | -0.09903 |
| H | -2.09277 | 3.95683  | -1.40350 |
| H | -2.28641 | 3.20113  | 0.18348  |
| H | -0.94206 | 0.40488  | -1.94935 |
| H | -2.36587 | 1.01628  | -1.10202 |
| H | -1.90361 | 1.72041  | -2.65100 |
| H | -0.86754 | 2.03121  | 1.97536  |
| C | -1.48118 | 0.26440  | 1.42138  |
| O | -2.39059 | 0.33228  | 2.25629  |
| C | -1.28565 | -3.36453 | -0.87433 |
| C | -0.10866 | -2.83440 | -0.34614 |
| C | -0.13493 | -1.64183 | 0.37922  |
| C | -1.34614 | -0.97547 | 0.58985  |
| C | -2.53273 | -1.53656 | 0.09346  |
| C | -2.50241 | -2.71240 | -0.65009 |
| H | -1.25938 | -4.28546 | -1.44982 |

|   |          |          |          |
|---|----------|----------|----------|
| H | 0.83822  | -3.34379 | -0.49883 |
| H | 0.78344  | -1.25079 | 0.79363  |
| H | -3.47358 | -1.03168 | 0.28686  |
| H | -3.42476 | -3.12467 | -1.04869 |

4p\_conformer-033

|   |          |          |          |
|---|----------|----------|----------|
| C | 1.34501  | 0.80977  | -0.16079 |
| C | 1.68547  | 0.22171  | -1.36371 |
| C | 2.84793  | -0.57505 | -1.14345 |
| C | 3.19642  | -0.45947 | 0.18971  |
| N | 2.28142  | 0.39626  | 0.76485  |
| H | 3.37541  | -1.16973 | -1.87778 |
| C | 4.31758  | -1.06279 | 0.97171  |
| H | 2.23610  | 0.61852  | 1.74952  |
| H | 3.95366  | -1.64135 | 1.83035  |
| H | 4.89374  | -1.73815 | 0.33341  |
| H | 5.00518  | -0.30066 | 1.36085  |
| C | 0.20592  | 1.69037  | 0.27163  |
| H | 1.14418  | 0.32247  | -2.29332 |
| N | -0.44429 | 1.16017  | 1.50053  |
| H | 0.62036  | 2.64665  | 0.61837  |
| C | -0.77916 | 2.02947  | -0.87587 |
| C | -2.06768 | 2.67527  | -0.35166 |
| C | -0.10852 | 2.97695  | -1.88342 |
| H | -1.04122 | 1.09424  | -1.38517 |
| H | 0.83577  | 2.58123  | -2.26337 |
| H | -0.77233 | 3.15740  | -2.73577 |
| H | 0.09891  | 3.94586  | -1.41154 |
| H | -2.64853 | 2.00465  | 0.28688  |
| H | -1.84268 | 3.57947  | 0.22798  |
| H | -2.70512 | 2.96849  | -1.19263 |
| H | -0.57727 | 1.85117  | 2.23086  |
| C | -1.38243 | 0.16798  | 1.60664  |
| O | -2.17869 | 0.15835  | 2.55053  |
| C | -1.65896 | -3.02329 | -1.25295 |
| C | -0.43514 | -2.76407 | -0.63481 |
| C | -0.31315 | -1.70881 | 0.27017  |
| C | -1.42673 | -0.91886 | 0.57554  |
| C | -2.66335 | -1.20455 | -0.01986 |
| C | -2.77527 | -2.23957 | -0.94545 |
| H | -1.74635 | -3.83658 | -1.96774 |
| H | 0.43293  | -3.37554 | -0.86232 |
| H | 0.64044  | -1.51390 | 0.74534  |
| H | -3.52961 | -0.60497 | 0.24220  |
| H | -3.73168 | -2.44141 | -1.41877 |

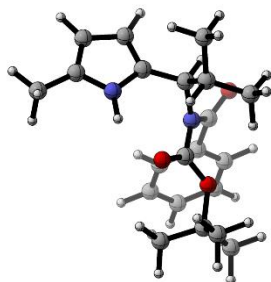

4q\_conformer-001

|   |          |          |          |
|---|----------|----------|----------|
| C | -2.57340 | -0.57115 | -0.32656 |
| C | -3.37850 | -1.61085 | -0.75418 |
| C | -4.02614 | -2.15254 | 0.39544  |
| C | -3.59662 | -1.43436 | 1.49864  |
| N | -2.72768 | -0.47211 | 1.04021  |
| H | -4.72796 | -2.97617 | 0.42105  |
| C | -3.92334 | -1.57535 | 2.95031  |
| H | -2.16932 | 0.16330  | 1.59912  |
| H | -4.63773 | -2.39059 | 3.09467  |
| H | -3.03258 | -1.80002 | 3.55153  |
| H | -4.36949 | -0.66068 | 3.36160  |
| C | -1.70099 | 0.35082  | -1.11848 |
| H | -3.49195 | -1.93190 | -1.78163 |
| N | -0.25972 | 0.20439  | -0.73172 |
| H | -1.71894 | -0.00309 | -2.15009 |
| C | -2.15401 | 1.83100  | -1.14598 |
| C | -1.17755 | 2.68933  | -1.96037 |
| C | -3.56992 | 1.91924  | -1.72755 |
| H | -2.18237 | 2.20751  | -0.11843 |
| H | -3.91122 | 2.95989  | -1.73771 |
| H | -3.59185 | 1.54775  | -2.76007 |
| H | -4.28150 | 1.32910  | -1.14304 |
| H | -1.54206 | 3.72000  | -2.02639 |
| H | -0.17771 | 2.71879  | -1.51611 |
| H | -1.07674 | 2.29872  | -2.98030 |
| C | 0.58808  | -0.48700 | -1.62169 |
| O | 0.32006  | -0.56069 | -2.81344 |
| C | 3.91928  | -2.66468 | -0.04441 |
| C | 2.73205  | -2.59506 | 0.68932  |
| C | 1.65009  | -1.86758 | 0.19775  |
| C | 1.74826  | -1.21890 | -1.03969 |
| C | 2.92528  | -1.31970 | -1.78957 |
| C | 4.01405  | -2.02723 | -1.28486 |
| H | 4.76621  | -3.22100 | 0.34597  |
| H | 2.65001  | -3.10505 | 1.64430  |
| H | 0.72721  | -1.81078 | 0.76671  |
| H | 2.98179  | -0.82701 | -2.75461 |



|   |          |          |          |
|---|----------|----------|----------|
| H | 4.93417  | -2.08547 | -1.85830 |
| C | 0.21859  | 0.88808  | 0.38747  |
| O | -0.49436 | 1.22228  | 1.32468  |
| O | 1.50894  | 1.18174  | 0.24921  |
| C | 2.31952  | 1.73425  | 1.36343  |
| C | 3.73085  | 1.68005  | 0.78327  |
| C | 1.87261  | 3.17083  | 1.62424  |
| C | 2.20634  | 0.84587  | 2.60117  |
| H | 4.00923  | 0.64807  | 0.54940  |
| H | 3.79368  | 2.27551  | -0.13276 |
| H | 4.44384  | 2.08174  | 1.50948  |
| H | 0.85146  | 3.19902  | 2.00826  |
| H | 2.53915  | 3.63060  | 2.36119  |
| H | 1.92331  | 3.75790  | 0.70152  |
| H | 1.19760  | 0.86079  | 3.01572  |
| H | 2.48001  | -0.18445 | 2.35736  |
| H | 2.90133  | 1.21453  | 3.36237  |

4q\_conformer-002

|   |          |          |          |
|---|----------|----------|----------|
| C | 2.64661  | 0.23256  | -0.27151 |
| C | 3.48724  | 1.25239  | -0.67641 |
| C | 4.28268  | 1.62321  | 0.44861  |
| C | 3.90330  | 0.82553  | 1.51505  |
| N | 2.92005  | -0.01961 | 1.05623  |
| H | 5.04761  | 2.38828  | 0.48246  |
| C | 4.37841  | 0.78913  | 2.93172  |
| H | 2.36462  | -0.66766 | 1.60389  |
| H | 4.79257  | -0.19108 | 3.20105  |
| H | 5.16247  | 1.53651  | 3.08165  |
| H | 3.56925  | 1.00519  | 3.64158  |
| C | 1.62117  | -0.53976 | -1.04016 |
| H | 3.52627  | 1.67178  | -1.67336 |
| N | 0.24140  | -0.30799 | -0.49922 |
| H | 1.57475  | -0.10097 | -2.03815 |
| C | 1.94020  | -2.04272 | -1.22118 |
| C | 0.82094  | -2.77053 | -1.97514 |
| C | 3.27228  | -2.18167 | -1.97003 |
| H | 2.05479  | -2.50137 | -0.23424 |
| H | 3.53171  | -3.23935 | -2.08521 |
| H | 3.20477  | -1.74003 | -2.97246 |
| H | 4.08693  | -1.68304 | -1.43731 |
| H | 1.12176  | -3.80048 | -2.19496 |
| H | -0.10949 | -2.81614 | -1.40203 |
| H | 0.60443  | -2.27239 | -2.92866 |
| C | -0.22624 | -1.04504 | 0.59700  |

|   |          |          |          |
|---|----------|----------|----------|
| O | 0.55367  | -1.55753 | 1.39848  |
| C | -4.41794 | -1.82799 | 0.98429  |
| C | -3.86209 | -1.68769 | -0.29052 |
| C | -2.50416 | -1.41324 | -0.43248 |
| C | -1.69134 | -1.29082 | 0.70248  |
| C | -2.24487 | -1.46252 | 1.97657  |
| C | -3.60737 | -1.71618 | 2.11729  |
| H | -5.47909 | -2.03077 | 1.09379  |
| H | -4.48656 | -1.79049 | -1.17261 |
| H | -2.07299 | -1.30121 | -1.42176 |
| H | -1.60238 | -1.37820 | 2.84650  |
| H | -4.03708 | -1.82879 | 3.10793  |
| C | -0.39255 | 0.86455  | -0.95084 |
| O | -0.09956 | 1.40394  | -2.00238 |
| O | -1.27311 | 1.29895  | -0.05084 |
| C | -2.23414 | 2.38687  | -0.34890 |
| C | -3.03516 | 2.05768  | -1.60763 |
| C | -3.13096 | 2.36502  | 0.88705  |
| C | -1.46844 | 3.70312  | -0.46408 |
| H | -2.39944 | 2.04350  | -2.49403 |
| H | -3.52775 | 1.08670  | -1.50237 |
| H | -3.80805 | 2.82065  | -1.74491 |
| H | -3.62873 | 1.39526  | 0.98225  |
| H | -2.54318 | 2.54678  | 1.79213  |
| H | -3.89300 | 3.14579  | 0.80397  |
| H | -0.86937 | 3.87371  | 0.43620  |
| H | -0.80909 | 3.69702  | -1.33364 |
| H | -2.17939 | 4.52957  | -0.56590 |

4q\_conformer-003

|   |          |          |          |
|---|----------|----------|----------|
| C | -2.58225 | -0.30122 | 0.59128  |
| C | -3.18257 | -0.22223 | 1.83432  |
| C | -4.16932 | 0.80454  | 1.77411  |
| C | -4.15093 | 1.33197  | 0.49437  |
| N | -3.19469 | 0.64113  | -0.21243 |
| H | -4.82716 | 1.12464  | 2.57165  |
| C | -4.94825 | 2.43317  | -0.12629 |
| H | -2.87630 | 0.86102  | -1.14647 |
| H | -4.30992 | 3.25666  | -0.47207 |
| H | -5.52562 | 2.08433  | -0.99208 |
| H | -5.65257 | 2.84056  | 0.60418  |
| C | -1.52113 | -1.23948 | 0.11277  |
| H | -2.94157 | -0.84881 | 2.68339  |
| N | -0.19346 | -0.55657 | -0.03938 |
| H | -1.34424 | -1.93979 | 0.93018  |

|   |          |          |          |
|---|----------|----------|----------|
| C | -1.90561 | -2.06545 | -1.14113 |
| C | -0.73793 | -2.93569 | -1.62015 |
| C | -3.13461 | -2.92624 | -0.82524 |
| H | -2.16335 | -1.36726 | -1.94314 |
| H | -3.43403 | -3.50184 | -1.70773 |
| H | -2.91476 | -3.63752 | -0.01870 |
| H | -3.98499 | -2.31368 | -0.51112 |
| H | -1.04388 | -3.53911 | -2.48144 |
| H | 0.12155  | -2.33101 | -1.92646 |
| H | -0.40719 | -3.62111 | -0.83017 |
| C | -0.07462 | 0.55939  | -0.87624 |
| O | -0.85786 | 0.73738  | -1.80637 |
| C | 2.79677  | 3.59517  | 0.04957  |
| C | 2.15656  | 2.91269  | 1.08777  |
| C | 1.23911  | 1.90525  | 0.79803  |
| C | 0.94859  | 1.58627  | -0.53452 |
| C | 1.56303  | 2.29542  | -1.57240 |
| C | 2.49755  | 3.28656  | -1.28049 |
| H | 3.52112  | 4.37166  | 0.27673  |
| H | 2.37309  | 3.16458  | 2.12146  |
| H | 0.73890  | 1.37348  | 1.60128  |
| H | 1.31498  | 2.05049  | -2.59989 |
| H | 2.98996  | 3.82050  | -2.08751 |
| C | 0.91585  | -1.21502 | 0.52030  |
| O | 0.81364  | -2.03266 | 1.41777  |
| O | 2.03444  | -0.86777 | -0.11450 |
| C | 3.37577  | -1.25286 | 0.38414  |
| C | 3.55284  | -0.80081 | 1.83271  |
| C | 3.55193  | -2.75960 | 0.20902  |
| C | 4.29735  | -0.46785 | -0.54672 |
| H | 3.36709  | 0.27353  | 1.92094  |
| H | 2.88095  | -1.33743 | 2.50399  |
| H | 4.58457  | -0.99747 | 2.14134  |
| H | 2.86892  | -3.31107 | 0.85721  |
| H | 3.36461  | -3.04500 | -0.83124 |
| H | 4.58035  | -3.03737 | 0.46199  |
| H | 4.12788  | -0.75627 | -1.58876 |
| H | 4.11660  | 0.60670  | -0.44786 |
| H | 5.34152  | -0.67489 | -0.29358 |

#### 4q\_conformer-004

|   |         |          |          |
|---|---------|----------|----------|
| C | 2.54053 | -0.55916 | -0.55742 |
| C | 3.20819 | -0.72532 | -1.75611 |
| C | 4.12341 | 0.35925  | -1.89539 |
| C | 3.99239 | 1.16779  | -0.77973 |

|   |          |          |          |
|---|----------|----------|----------|
| N | 3.03918  | 0.59013  | 0.02659  |
| H | 4.80654  | 0.53470  | -2.71630 |
| C | 4.67732  | 2.44082  | -0.40080 |
| H | 2.66027  | 0.99190  | 0.87374  |
| H | 3.96571  | 3.26844  | -0.28241 |
| H | 5.22608  | 2.34674  | 0.54512  |
| H | 5.39345  | 2.72437  | -1.17691 |
| C | 1.48718  | -1.41249 | 0.07611  |
| H | 3.05189  | -1.54344 | -2.44710 |
| N | 0.12771  | -0.77851 | -0.00435 |
| H | 1.38517  | -2.29189 | -0.55996 |
| C | 1.83243  | -1.90703 | 1.50246  |
| C | 0.65363  | -2.64635 | 2.14230  |
| C | 3.07065  | -2.80970 | 1.42786  |
| H | 2.07182  | -1.04025 | 2.12460  |
| H | 3.36340  | -3.13782 | 2.43094  |
| H | 2.86521  | -3.70508 | 0.82718  |
| H | 3.92059  | -2.28938 | 0.97593  |
| H | 0.95393  | -3.08250 | 3.10124  |
| H | -0.18730 | -1.97335 | 2.33102  |
| H | 0.30040  | -3.46206 | 1.49864  |
| C | -0.79102 | -1.33654 | -0.91511 |
| O | -0.40963 | -2.07580 | -1.81384 |
| C | -4.99838 | -0.74189 | -0.36014 |
| C | -4.17431 | -0.89670 | 0.75806  |
| C | -2.80126 | -1.06576 | 0.59494  |
| C | -2.24649 | -1.09506 | -0.69050 |
| C | -3.07817 | -0.97566 | -1.80931 |
| C | -4.44826 | -0.78292 | -1.64400 |
| H | -6.06692 | -0.59765 | -0.23111 |
| H | -4.60093 | -0.88380 | 1.75641  |
| H | -2.16307 | -1.18307 | 1.46443  |
| H | -2.63967 | -1.01788 | -2.80080 |
| H | -5.08688 | -0.66843 | -2.51459 |
| C | -0.04388 | 0.47534  | 0.59289  |
| O | 0.62839  | 0.84519  | 1.54504  |
| O | -0.95962 | 1.19608  | -0.04552 |
| C | -1.45823 | 2.48929  | 0.48240  |
| C | -2.59009 | 2.81251  | -0.49039 |
| C | -1.99459 | 2.31080  | 1.90165  |
| C | -0.33508 | 3.52101  | 0.39906  |
| H | -2.20865 | 2.88756  | -1.51336 |
| H | -3.35656 | 2.03243  | -0.45931 |
| H | -3.04789 | 3.76829  | -0.21830 |
| H | -1.19846 | 2.05216  | 2.60109  |
| H | -2.45302 | 3.25029  | 2.22658  |

|   |          |         |          |
|---|----------|---------|----------|
| H | -2.76067 | 1.53037 | 1.92327  |
| H | 0.47765  | 3.27286 | 1.08358  |
| H | 0.06019  | 3.57008 | -0.62067 |
| H | -0.72940 | 4.50772 | 0.66298  |

4q\_conformer-005

|   |          |          |          |
|---|----------|----------|----------|
| C | -2.62329 | -0.18595 | 0.14442  |
| C | -3.50430 | 0.45909  | -0.70290 |
| C | -4.12820 | 1.50311  | 0.04359  |
| C | -3.60794 | 1.47921  | 1.32635  |
| N | -2.70321 | 0.44453  | 1.37031  |
| H | -4.87908 | 2.19659  | -0.31243 |
| C | -3.88827 | 2.33814  | 2.51672  |
| H | -2.10359 | 0.19668  | 2.14873  |
| H | -4.28041 | 1.75609  | 3.36075  |
| H | -2.98664 | 2.85506  | 2.87021  |
| H | -4.63104 | 3.09877  | 2.26090  |
| C | -1.63456 | -1.29375 | -0.05011 |
| H | -3.68162 | 0.20670  | -1.73915 |
| N | -0.23700 | -0.74078 | -0.01566 |
| H | -1.65873 | -1.93805 | 0.83245  |
| C | -1.91230 | -2.19628 | -1.26998 |
| C | -0.72472 | -3.11629 | -1.56999 |
| C | -3.18035 | -3.02004 | -1.00162 |
| H | -2.08234 | -1.56096 | -2.14242 |
| H | -3.43120 | -3.62615 | -1.87884 |
| H | -3.02999 | -3.70201 | -0.15485 |
| H | -4.03612 | -2.37853 | -0.77286 |
| H | -0.98920 | -3.82739 | -2.36030 |
| H | 0.14534  | -2.54738 | -1.90777 |
| H | -0.43604 | -3.69344 | -0.68240 |
| C | 0.43511  | -0.79521 | 1.21939  |
| O | -0.19084 | -0.91754 | 2.27018  |
| C | 4.71406  | -0.83320 | 1.26743  |
| C | 4.03486  | -1.40787 | 0.18936  |
| C | 2.64264  | -1.38942 | 0.15263  |
| C | 1.92260  | -0.80469 | 1.20255  |
| C | 2.60435  | -0.25910 | 2.29666  |
| C | 3.99705  | -0.26099 | 2.32197  |
| H | 5.79976  | -0.83815 | 1.28902  |
| H | 4.58992  | -1.86917 | -0.62172 |
| H | 2.11347  | -1.83753 | -0.68160 |
| H | 2.03393  | 0.17828  | 3.10920  |
| H | 4.52360  | 0.18118  | 3.16222  |
| C | 0.13051  | 0.16681  | -1.02230 |

|   |          |         |          |
|---|----------|---------|----------|
| O | -0.33533 | 0.13169 | -2.14566 |
| O | 0.99135  | 1.07037 | -0.54864 |
| C | 1.72538  | 1.99723 | -1.43962 |
| C | 2.70514  | 2.66021 | -0.47356 |
| C | 2.47229  | 1.21259 | -2.51733 |
| C | 0.74035  | 3.00968 | -2.02056 |
| H | 2.16601  | 3.17230 | 0.32950  |
| H | 3.36909  | 1.91353 | -0.02766 |
| H | 3.31173  | 3.39616 | -1.00999 |
| H | 1.78207  | 0.71545 | -3.20040 |
| H | 3.09542  | 1.90432 | -3.09319 |
| H | 3.12490  | 0.46426 | -2.05792 |
| H | 0.02762  | 2.52260 | -2.68788 |
| H | 0.19051  | 3.50807 | -1.21563 |
| H | 1.29022  | 3.77055 | -2.58417 |

4q\_conformer-006

|   |          |          |          |
|---|----------|----------|----------|
| C | 1.97640  | -0.99827 | 0.47025  |
| C | 3.20128  | -0.42217 | 0.19069  |
| C | 3.84764  | -1.24218 | -0.78282 |
| C | 3.00137  | -2.29674 | -1.08072 |
| N | 1.87589  | -2.13465 | -0.30700 |
| H | 4.82604  | -1.08460 | -1.21783 |
| C | 3.15660  | -3.44571 | -2.02345 |
| H | 1.05093  | -2.72319 | -0.30755 |
| H | 4.11852  | -3.37731 | -2.53891 |
| H | 3.12213  | -4.41176 | -1.50340 |
| H | 2.36716  | -3.45914 | -2.78604 |
| C | 0.82245  | -0.59905 | 1.33762  |
| H | 3.59033  | 0.48184  | 0.63786  |
| N | -0.36979 | -0.25344 | 0.48529  |
| H | 0.47388  | -1.48528 | 1.87383  |
| C | 1.16214  | 0.45717  | 2.41082  |
| C | -0.10169 | 1.05875  | 3.03263  |
| C | 2.03815  | -0.19660 | 3.49001  |
| H | 1.73164  | 1.26383  | 1.94386  |
| H | 2.35278  | 0.55032  | 4.22683  |
| H | 1.48278  | -0.97952 | 4.02202  |
| H | 2.93533  | -0.65028 | 3.05891  |
| H | 0.16578  | 1.71441  | 3.86850  |
| H | -0.66230 | 1.65229  | 2.30576  |
| H | -0.76511 | 0.27500  | 3.41945  |
| C | -1.33062 | -1.27041 | 0.31094  |
| O | -1.02831 | -2.44976 | 0.47852  |
| C | -5.41900 | -0.25156 | -0.42519 |

|   |          |          |          |
|---|----------|----------|----------|
| C | -4.59485 | 0.66099  | 0.23932  |
| C | -3.25386 | 0.35817  | 0.45941  |
| C | -2.73157 | -0.86753 | 0.02325  |
| C | -3.56631 | -1.78898 | -0.62252 |
| C | -4.90304 | -1.47662 | -0.85653 |
| H | -6.46303 | -0.01020 | -0.60186 |
| H | -4.99842 | 1.60689  | 0.58742  |
| H | -2.61705 | 1.06064  | 0.98571  |
| H | -3.15308 | -2.73997 | -0.94116 |
| H | -5.54314 | -2.18725 | -1.37045 |
| C | -0.29567 | 0.75706  | -0.48727 |
| O | -0.94679 | 0.74636  | -1.51704 |
| O | 0.58062  | 1.68755  | -0.11422 |
| C | 1.01969  | 2.75038  | -1.04709 |
| C | -0.15874 | 3.67220  | -1.35588 |
| C | 2.08638  | 3.47783  | -0.23182 |
| C | 1.62841  | 2.11756  | -2.29808 |
| H | -0.93143 | 3.14714  | -1.91856 |
| H | -0.59255 | 4.05618  | -0.42660 |
| H | 0.19358  | 4.52377  | -1.94711 |
| H | 2.91151  | 2.80190  | 0.01075  |
| H | 2.48246  | 4.31879  | -0.80894 |
| H | 1.66248  | 3.86403  | 0.70035  |
| H | 2.40252  | 1.39701  | -2.01596 |
| H | 0.87052  | 1.60985  | -2.89640 |
| H | 2.08771  | 2.90227  | -2.90796 |

#### 4q\_conformer-007

|   |          |          |          |
|---|----------|----------|----------|
| C | -2.13598 | -0.68650 | 0.20659  |
| C | -3.31105 | 0.02962  | 0.07128  |
| C | -4.08192 | -0.60336 | -0.94955 |
| C | -3.35553 | -1.68532 | -1.41761 |
| N | -2.18453 | -1.72643 | -0.69672 |
| H | -5.05898 | -0.30560 | -1.30756 |
| C | -3.66060 | -2.68400 | -2.48685 |
| H | -1.39444 | -2.34422 | -0.84713 |
| H | -4.63823 | -2.47111 | -2.92804 |
| H | -2.91641 | -2.66126 | -3.29361 |
| H | -3.68414 | -3.70955 | -2.09631 |
| C | -0.96732 | -0.47090 | 1.11507  |
| H | -3.58297 | 0.90056  | 0.65329  |
| N | 0.27578  | -0.15243 | 0.32980  |
| H | -1.16588 | 0.44123  | 1.67625  |
| C | -0.73413 | -1.58573 | 2.16241  |
| C | 0.50238  | -1.29807 | 3.02243  |

|   |          |          |          |
|---|----------|----------|----------|
| C | -1.98481 | -1.70654 | 3.04327  |
| H | -0.58954 | -2.53819 | 1.64454  |
| H | -1.85156 | -2.50651 | 3.77913  |
| H | -2.17026 | -0.77322 | 3.59003  |
| H | -2.87501 | -1.93034 | 2.44863  |
| H | 0.58637  | -2.04112 | 3.82272  |
| H | 1.43173  | -1.32851 | 2.44639  |
| H | 0.42995  | -0.30754 | 3.48924  |
| C | 1.07405  | -1.19359 | -0.17533 |
| O | 0.60178  | -2.30754 | -0.39288 |
| C | 5.29683  | -0.62715 | -0.56732 |
| C | 4.58283  | 0.15667  | 0.34327  |
| C | 3.20365  | 0.00699  | 0.46114  |
| C | 2.53094  | -0.93824 | -0.32677 |
| C | 3.25345  | -1.73614 | -1.22354 |
| C | 4.63043  | -1.57299 | -1.35120 |
| H | 6.37166  | -0.50426 | -0.66223 |
| H | 5.10136  | 0.88248  | 0.96209  |
| H | 2.65064  | 0.60765  | 1.17529  |
| H | 2.72315  | -2.47290 | -1.81728 |
| H | 5.18466  | -2.18372 | -2.05732 |
| C | 0.39218  | 1.11639  | -0.26343 |
| O | 1.04529  | 1.32519  | -1.27030 |
| O | -0.31397 | 2.01563  | 0.42322  |
| C | -0.60002 | 3.35849  | -0.13356 |
| C | -1.30995 | 3.21073  | -1.47894 |
| C | -1.53889 | 3.94861  | 0.91602  |
| C | 0.69727  | 4.15929  | -0.22640 |
| H | -0.64102 | 2.80756  | -2.24071 |
| H | -2.17399 | 2.54623  | -1.37624 |
| H | -1.66354 | 4.19302  | -1.80811 |
| H | -1.04943 | 3.98477  | 1.89422  |
| H | -1.82045 | 4.96639  | 0.62992  |
| H | -2.44849 | 3.34594  | 1.00093  |
| H | 1.19424  | 4.19033  | 0.74880  |
| H | 1.37715  | 3.72139  | -0.95806 |
| H | 0.46705  | 5.18682  | -0.52649 |

#### 4q\_conformer-008

|   |         |          |          |
|---|---------|----------|----------|
| C | 2.71539 | 0.28214  | -0.43167 |
| C | 3.65238 | 1.21327  | -0.84316 |
| C | 4.52356 | 1.46117  | 0.25821  |
| C | 4.09213 | 0.68321  | 1.31958  |
| N | 3.00344 | -0.03121 | 0.87924  |
| H | 5.36793 | 2.13802  | 0.28259  |



|   |          |          |          |
|---|----------|----------|----------|
| C | 4.60768  | 0.55502  | 2.71670  |
| H | 2.41462  | -0.65563 | 1.42039  |
| H | 5.47592  | 1.20530  | 2.85521  |
| H | 3.85282  | 0.84072  | 3.46091  |
| H | 4.91756  | -0.47243 | 2.94770  |
| C | 1.59812  | -0.33712 | -1.21384 |
| H | 3.70105  | 1.65828  | -1.82881 |
| N | 0.26049  | -0.17342 | -0.55536 |
| H | 1.48440  | 0.28422  | -2.10185 |
| C | 1.86971  | -1.76448 | -1.77259 |
| C | 2.41663  | -2.82073 | -0.80342 |
| C | 0.65338  | -2.29432 | -2.54161 |
| H | 2.66774  | -1.57618 | -2.50377 |
| H | 0.93272  | -3.17065 | -3.13623 |
| H | -0.14675 | -2.60276 | -1.86006 |
| H | 0.24454  | -1.53749 | -3.22109 |
| H | 2.76515  | -3.68638 | -1.37852 |
| H | 3.26386  | -2.43564 | -0.22884 |
| H | 1.65851  | -3.16720 | -0.09834 |
| C | -0.15686 | -0.99435 | 0.50439  |
| O | 0.65243  | -1.51053 | 1.27186  |
| C | -4.30438 | -1.98100 | 0.90593  |
| C | -3.78721 | -1.70259 | -0.36228 |
| C | -2.44490 | -1.36139 | -0.50856 |
| C | -1.60797 | -1.30986 | 0.61447  |
| C | -2.12283 | -1.61766 | 1.87969  |
| C | -3.47006 | -1.93897 | 2.02647  |
| H | -5.35370 | -2.23616 | 1.01960  |
| H | -4.42962 | -1.74963 | -1.23615 |
| H | -2.04539 | -1.14239 | -1.49280 |
| H | -1.46225 | -1.58539 | 2.73938  |
| H | -3.86965 | -2.15810 | 3.01185  |
| C | -0.43121 | 1.00872  | -0.88300 |
| O | -0.22510 | 1.63312  | -1.90817 |
| O | -1.26341 | 1.34869  | 0.10037  |
| C | -2.27161 | 2.42432  | -0.05457 |
| C | -3.14236 | 2.16471  | -1.28283 |
| C | -3.08643 | 2.28179  | 1.22916  |
| C | -1.55038 | 3.76890  | -0.11607 |
| H | -2.56462 | 2.23684  | -2.20533 |
| H | -3.60102 | 1.17365  | -1.22195 |
| H | -3.94254 | 2.91113  | -1.31323 |
| H | -2.44726 | 2.41494  | 2.10745  |
| H | -3.87359 | 3.04140  | 1.25308  |
| H | -3.55006 | 1.29199  | 1.28093  |
| H | -0.90104 | 3.89177  | 0.75670  |

|   |          |         |          |
|---|----------|---------|----------|
| H | -0.94693 | 3.84741 | -1.02195 |
| H | -2.28821 | 4.57784 | -0.11247 |

4q\_conformer-009

|   |          |          |          |
|---|----------|----------|----------|
| C | -2.42918 | 0.25032  | 0.23115  |
| C | -3.13499 | 1.12759  | -0.56917 |
| C | -3.25394 | 2.35795  | 0.14540  |
| C | -2.60966 | 2.21043  | 1.36092  |
| N | -2.11978 | 0.92375  | 1.39790  |
| H | -3.76100 | 3.25457  | -0.18644 |
| C | -2.41802 | 3.16321  | 2.49581  |
| H | -1.55201 | 0.52192  | 2.13389  |
| H | -2.87265 | 4.12745  | 2.25304  |
| H | -2.87897 | 2.79747  | 3.42229  |
| H | -1.35507 | 3.33704  | 2.70787  |
| C | -1.84800 | -1.10963 | -0.00123 |
| H | -3.52000 | 0.90952  | -1.55600 |
| N | -0.38395 | -0.94051 | -0.29723 |
| H | -1.84795 | -1.65402 | 0.94587  |
| C | -2.60068 | -1.98197 | -1.02227 |
| C | -1.83387 | -3.27715 | -1.30613 |
| C | -4.00483 | -2.29005 | -0.48260 |
| H | -2.69714 | -1.42477 | -1.95807 |
| H | -4.56313 | -2.89400 | -1.20601 |
| H | -3.94593 | -2.85925 | 0.45407  |
| H | -4.57256 | -1.37586 | -0.28830 |
| H | -2.40798 | -3.91510 | -1.98707 |
| H | -0.86460 | -3.07134 | -1.76646 |
| H | -1.66438 | -3.84268 | -0.38078 |
| C | 0.01692  | -0.31443 | -1.49998 |
| O | -0.50810 | -0.60111 | -2.56512 |
| C | 2.80053  | 2.93417  | -1.34719 |
| C | 1.83241  | 2.80478  | -0.34863 |
| C | 0.94652  | 1.72845  | -0.36981 |
| C | 1.01597  | 0.78897  | -1.40614 |
| C | 1.96147  | 0.94070  | -2.42675 |
| C | 2.86440  | 2.00051  | -2.38636 |
| H | 3.49972  | 3.76463  | -1.32071 |
| H | 1.76879  | 3.53928  | 0.44853  |
| H | 0.19372  | 1.62700  | 0.40526  |
| H | 1.99053  | 0.21647  | -3.23438 |
| H | 3.61341  | 2.10363  | -3.16562 |
| C | 0.49489  | -1.11829 | 0.77124  |
| O | 0.12527  | -1.19424 | 1.93583  |
| O | 1.74424  | -1.24876 | 0.32564  |

|   |         |          |          |
|---|---------|----------|----------|
| C | 2.90921 | -1.26497 | 1.24244  |
| C | 2.90589 | -0.02671 | 2.13756  |
| C | 2.88769 | -2.56772 | 2.03920  |
| C | 4.08235 | -1.22469 | 0.26576  |
| H | 2.87150 | 0.88257  | 1.53129  |
| H | 2.05764 | -0.03119 | 2.82339  |
| H | 3.82947 | -0.01410 | 2.72530  |
| H | 2.84193 | -3.42660 | 1.36185  |
| H | 3.80443 | -2.64656 | 2.63267  |
| H | 2.02933 | -2.59953 | 2.71245  |
| H | 4.05492 | -2.08872 | -0.40541 |
| H | 4.04658 | -0.31224 | -0.33722 |
| H | 5.02558 | -1.24408 | 0.81992  |

4q\_conformer-010

|   |          |          |          |
|---|----------|----------|----------|
| C | -2.61507 | -0.40627 | -0.15830 |
| C | -3.26601 | -0.80762 | -1.30890 |
| C | -4.11080 | 0.26495  | -1.72158 |
| C | -3.95358 | 1.30358  | -0.81995 |
| N | -3.04914 | 0.87583  | 0.12439  |
| H | -4.76840 | 0.28003  | -2.58119 |
| C | -4.57963 | 2.65912  | -0.75924 |
| H | -2.68458 | 1.43203  | 0.88658  |
| H | -5.16456 | 2.80227  | 0.15861  |
| H | -3.82845 | 3.45900  | -0.79341 |
| H | -5.25304 | 2.79667  | -1.60970 |
| C | -1.56928 | -1.04645 | 0.70429  |
| H | -3.13785 | -1.76182 | -1.80024 |
| N | -0.20077 | -0.55040 | 0.33129  |
| H | -1.68873 | -0.66835 | 1.72283  |
| C | -1.65533 | -2.58258 | 0.79338  |
| C | -0.48158 | -3.16840 | 1.58832  |
| C | -2.98603 | -2.97168 | 1.45407  |
| H | -1.63567 | -2.99840 | -0.21778 |
| H | -3.07996 | -4.06196 | 1.49828  |
| H | -3.03809 | -2.58877 | 2.48129  |
| H | -3.84064 | -2.57526 | 0.89956  |
| H | -0.62993 | -4.24321 | 1.73756  |
| H | 0.47891  | -3.03783 | 1.08216  |
| H | -0.40664 | -2.69883 | 2.57728  |
| C | 0.50904  | -1.17029 | -0.71942 |
| O | -0.07915 | -1.79676 | -1.58938 |
| C | 4.79305  | -1.14689 | -0.63367 |
| C | 4.08316  | -1.13388 | 0.57058  |
| C | 2.69059  | -1.12174 | 0.55868  |

|   |          |          |          |
|---|----------|----------|----------|
| C | 1.99930  | -1.13529 | -0.66012 |
| C | 2.71252  | -1.18030 | -1.86314 |
| C | 4.10575  | -1.17154 | -1.85016 |
| H | 5.87896  | -1.14464 | -0.62337 |
| H | 4.61473  | -1.13141 | 1.51731  |
| H | 2.13823  | -1.10809 | 1.49246  |
| H | 2.16568  | -1.20443 | -2.79985 |
| H | 4.65555  | -1.18586 | -2.78634 |
| C | 0.10625  | 0.73457  | 0.79247  |
| O | -0.48383 | 1.25354  | 1.72980  |
| O | 1.04674  | 1.30464  | 0.04341  |
| C | 1.71447  | 2.56709  | 0.43599  |
| C | 2.80255  | 2.69437  | -0.62825 |
| C | 0.70860  | 3.71298  | 0.34778  |
| C | 2.32778  | 2.42166  | 1.82756  |
| H | 3.48027  | 1.83642  | -0.58801 |
| H | 2.35913  | 2.74281  | -1.62759 |
| H | 3.37950  | 3.60844  | -0.45842 |
| H | 0.24714  | 3.73650  | -0.64476 |
| H | -0.07384 | 3.60724  | 1.10072  |
| H | 1.22730  | 4.66379  | 0.50824  |
| H | 3.00294  | 1.56104  | 1.85631  |
| H | 1.55858  | 2.30007  | 2.59177  |
| H | 2.90823  | 3.32094  | 2.05694  |

#### 4q\_conformer-011

|   |          |          |          |
|---|----------|----------|----------|
| C | 0.37655  | 2.02084  | 0.01821  |
| C | 1.31667  | 2.76131  | -0.67714 |
| C | 0.63022  | 3.82686  | -1.32924 |
| C | -0.71420 | 3.71401  | -1.01865 |
| N | -0.84698 | 2.62425  | -0.19076 |
| H | 1.06431  | 4.59438  | -1.95669 |
| C | -1.89162 | 4.53323  | -1.43846 |
| H | -1.71446 | 2.22619  | 0.14658  |
| H | -1.56302 | 5.36073  | -2.07318 |
| H | -2.62010 | 3.94208  | -2.00863 |
| H | -2.42229 | 4.95942  | -0.57749 |
| C | 0.57567  | 0.84458  | 0.92152  |
| H | 2.37949  | 2.55861  | -0.69683 |
| N | -0.01782 | -0.42585 | 0.37705  |
| H | 1.64976  | 0.65226  | 0.92950  |
| C | 0.16767  | 1.09346  | 2.39892  |
| C | 0.37648  | -0.16286 | 3.25139  |
| C | 0.97628  | 2.27068  | 2.95748  |
| H | -0.89318 | 1.35659  | 2.42043  |

|   |          |          |          |
|---|----------|----------|----------|
| H | 0.69271  | 2.46482  | 3.99750  |
| H | 2.05155  | 2.05044  | 2.93840  |
| H | 0.81035  | 3.18472  | 2.38016  |
| H | 0.13296  | 0.04632  | 4.29856  |
| H | -0.25056 | -0.99482 | 2.91887  |
| H | 1.42279  | -0.49382 | 3.21235  |
| C | 0.79299  | -1.59782 | 0.33936  |
| O | 0.40393  | -2.66398 | 0.78660  |
| C | 4.66640  | -1.31090 | -1.45660 |
| C | 3.64226  | -0.46991 | -1.89901 |
| C | 2.38296  | -0.53235 | -1.30584 |
| C | 2.14202  | -1.44612 | -0.26993 |
| C | 3.16737  | -2.30118 | 0.15843  |
| C | 4.42818  | -2.22615 | -0.42654 |
| H | 5.64935  | -1.25530 | -1.91502 |
| H | 3.82373  | 0.23394  | -2.70550 |
| H | 1.58757  | 0.12380  | -1.64090 |
| H | 2.96250  | -3.01132 | 0.95260  |
| H | 5.22462  | -2.87925 | -0.08323 |
| C | -1.39859 | -0.52109 | 0.23409  |
| O | -2.17815 | 0.31892  | 0.66881  |
| O | -1.73325 | -1.58458 | -0.49364 |
| C | -3.14003 | -2.02565 | -0.61868 |
| C | -3.71776 | -2.29032 | 0.77110  |
| C | -3.93856 | -0.98877 | -1.40759 |
| C | -2.99954 | -3.32571 | -1.40777 |
| H | -3.06783 | -2.97642 | 1.32388  |
| H | -3.82534 | -1.36602 | 1.34077  |
| H | -4.70348 | -2.75551 | 0.67005  |
| H | -4.03691 | -0.05744 | -0.84894 |
| H | -3.44755 | -0.78089 | -2.36390 |
| H | -4.93817 | -1.38473 | -1.61515 |
| H | -2.53554 | -3.13692 | -2.38085 |
| H | -2.38164 | -4.04307 | -0.85917 |
| H | -3.98682 | -3.76739 | -1.57275 |

4q\_conformer-012

|   |         |          |          |
|---|---------|----------|----------|
| C | 2.64952 | -0.60779 | 0.46173  |
| C | 3.57664 | -1.55598 | 0.85747  |
| C | 4.32287 | -1.93576 | -0.29662 |
| C | 3.82778 | -1.21809 | -1.37225 |
| N | 2.82379 | -0.41153 | -0.89152 |
| H | 5.12722 | -2.65851 | -0.34457 |
| C | 4.20717 | -1.22735 | -2.81801 |
| H | 2.21592 | 0.19856  | -1.42746 |

|   |          |          |          |
|---|----------|----------|----------|
| H | 4.53879  | -0.23912 | -3.16218 |
| H | 5.02683  | -1.93188 | -2.98431 |
| H | 3.36974  | -1.52984 | -3.46032 |
| C | 1.65837  | 0.13256  | 1.30651  |
| H | 3.70122  | -1.92526 | 1.86748  |
| N | 0.25573  | 0.02515  | 0.78961  |
| H | 1.59514  | -0.42592 | 2.23983  |
| C | 2.06804  | 1.57092  | 1.74372  |
| C | 2.56969  | 2.52140  | 0.64900  |
| C | 0.95498  | 2.21826  | 2.57811  |
| H | 2.92163  | 1.38537  | 2.41003  |
| H | 1.31745  | 3.13934  | 3.04689  |
| H | 0.09251  | 2.48095  | 1.95461  |
| H | 0.60253  | 1.54368  | 3.36518  |
| H | 3.01546  | 3.40604  | 1.11817  |
| H | 3.33518  | 2.04758  | 0.02758  |
| H | 1.76391  | 2.85889  | -0.00631 |
| C | -0.65172 | -0.74980 | 1.54115  |
| O | -0.46431 | -0.97201 | 2.73004  |
| C | -3.89040 | -2.67733 | -0.49048 |
| C | -2.65338 | -2.55402 | -1.12761 |
| C | -1.60024 | -1.90346 | -0.48669 |
| C | -1.77896 | -1.38821 | 0.80324  |
| C | -3.00822 | -1.54389 | 1.45385  |
| C | -4.06641 | -2.17193 | 0.80127  |
| H | -4.71384 | -3.17286 | -0.99598 |
| H | -2.50917 | -2.96173 | -2.12346 |
| H | -0.63862 | -1.80474 | -0.98087 |
| H | -3.12725 | -1.15593 | 2.46012  |
| H | -5.02603 | -2.27223 | 1.29914  |
| C | -0.17742 | 0.81783  | -0.27979 |
| O | 0.54556  | 1.16692  | -1.20203 |
| O | -1.44622 | 1.17865  | -0.11058 |
| C | -2.21986 | 1.88327  | -1.16556 |
| C | -3.62615 | 1.89004  | -0.57120 |
| C | -1.66520 | 3.29834  | -1.31247 |
| C | -2.18551 | 1.09618  | -2.47410 |
| H | -3.98065 | 0.86661  | -0.41571 |
| H | -3.63585 | 2.41368  | 0.38973  |
| H | -4.31228 | 2.40085  | -1.25326 |
| H | -0.65366 | 3.28373  | -1.72179 |
| H | -2.30911 | 3.87091  | -1.98792 |
| H | -1.65043 | 3.80370  | -0.34139 |
| H | -1.18060 | 1.06339  | -2.89696 |
| H | -2.54239 | 0.07488  | -2.31593 |
| H | -2.84999 | 1.58497  | -3.19387 |

## 4q\_conformer-013

|   |          |          |          |
|---|----------|----------|----------|
| C | -2.58952 | 0.02464  | -0.17189 |
| C | -3.07748 | -0.33243 | -1.41465 |
| C | -3.83022 | 0.76873  | -1.91661 |
| C | -3.78548 | 1.78172  | -0.97440 |
| N | -3.02931 | 1.31271  | 0.07542  |
| H | -4.35108 | 0.82213  | -2.86394 |
| C | -4.39419 | 3.14631  | -0.96596 |
| H | -2.83657 | 1.83219  | 0.92058  |
| H | -4.94453 | 3.31301  | -1.89598 |
| H | -5.09631 | 3.27904  | -0.13257 |
| H | -3.63477 | 3.93426  | -0.87969 |
| C | -1.72038 | -0.67790 | 0.82524  |
| H | -2.89109 | -1.27454 | -1.90910 |
| N | -0.27565 | -0.35472 | 0.58813  |
| H | -1.90260 | -0.24104 | 1.80995  |
| C | -1.98307 | -2.19255 | 0.96228  |
| C | -0.96806 | -2.84297 | 1.91124  |
| C | -3.41350 | -2.41887 | 1.46846  |
| H | -1.88720 | -2.65415 | -0.02510 |
| H | -3.62358 | -3.49102 | 1.54657  |
| H | -3.54902 | -1.97752 | 2.46423  |
| H | -4.15090 | -1.97283 | 0.79531  |
| H | -1.21091 | -3.90093 | 2.05683  |
| H | 0.05616  | -2.78698 | 1.52997  |
| H | -0.98489 | -2.35237 | 2.89210  |
| C | 0.35447  | 0.52097  | 1.48864  |
| O | -0.06149 | 0.65185  | 2.63442  |
| C | 3.49863  | 3.06692  | 0.08542  |
| C | 2.42228  | 2.77223  | -0.75591 |
| C | 1.40788  | 1.92293  | -0.31899 |
| C | 1.45991  | 1.37629  | 0.96931  |
| C | 2.51892  | 1.70202  | 1.82337  |
| C | 3.54482  | 2.53192  | 1.37593  |
| H | 4.29538  | 3.71845  | -0.26097 |
| H | 2.37471  | 3.20176  | -1.75200 |
| H | 0.57167  | 1.69029  | -0.97115 |
| H | 2.53687  | 1.28743  | 2.82596  |
| H | 4.37739  | 2.76517  | 2.03275  |
| C | 0.40507  | -1.03733 | -0.42778 |
| O | -0.15798 | -1.56412 | -1.36955 |
| O | 1.71305  | -1.08847 | -0.15669 |
| C | 2.69848  | -1.58898 | -1.14090 |
| C | 2.56497  | -0.83572 | -2.46387 |

|   |         |          |          |
|---|---------|----------|----------|
| C | 4.02520 | -1.25731 | -0.46084 |
| C | 2.51208 | -3.09667 | -1.30027 |
| H | 1.61160 | -1.04668 | -2.95005 |
| H | 2.65319 | 0.24178  | -2.29826 |
| H | 3.37428 | -1.14789 | -3.13178 |
| H | 4.09467 | -1.75616 | 0.51087  |
| H | 4.85653 | -1.59633 | -1.08638 |
| H | 4.11681 | -0.17792 | -0.30656 |
| H | 2.57120 | -3.59136 | -0.32522 |
| H | 1.54696 | -3.32406 | -1.75590 |
| H | 3.30712 | -3.49730 | -1.93772 |

#### 4q\_conformer-014

|   |          |          |          |
|---|----------|----------|----------|
| C | -2.53582 | -0.74985 | 0.07143  |
| C | -3.36227 | -1.83499 | 0.31237  |
| C | -4.11734 | -1.55122 | 1.48691  |
| C | -3.72968 | -0.30220 | 1.94234  |
| N | -2.78700 | 0.17446  | 1.06352  |
| H | -4.85914 | -2.18523 | 1.95521  |
| C | -4.15884 | 0.48331  | 3.13949  |
| H | -2.21852 | 1.00691  | 1.17061  |
| H | -4.92134 | -0.06957 | 3.69513  |
| H | -3.32250 | 0.67955  | 3.82319  |
| H | -4.58467 | 1.45591  | 2.86107  |
| C | -1.60377 | -0.55156 | -1.08478 |
| H | -3.41966 | -2.72361 | -0.30312 |
| N | -0.17747 | -0.30967 | -0.68422 |
| H | -1.53811 | -1.53046 | -1.55802 |
| C | -2.08720 | 0.39340  | -2.22336 |
| C | -3.27892 | -0.26803 | -2.93086 |
| C | -2.45397 | 1.82588  | -1.81644 |
| H | -1.25156 | 0.43439  | -2.93494 |
| H | -2.83587 | 2.36518  | -2.69071 |
| H | -3.24120 | 1.82475  | -1.05466 |
| H | -1.60468 | 2.38472  | -1.42128 |
| H | -3.59537 | 0.33408  | -3.78914 |
| H | -3.02483 | -1.27061 | -3.29408 |
| H | -4.13100 | -0.36381 | -2.24871 |
| C | 0.76853  | -1.25999 | -1.14005 |
| O | 0.55300  | -1.92235 | -2.14546 |
| C | 4.20779  | -2.09890 | 1.26699  |
| C | 3.00148  | -1.75922 | 1.88501  |
| C | 1.88196  | -1.45854 | 1.11168  |
| C | 1.96282  | -1.51136 | -0.28560 |
| C | 3.16232  | -1.88579 | -0.90177 |



|   |          |          |          |
|---|----------|----------|----------|
| C | 4.28638  | -2.16317 | -0.12729 |
| H | 5.08283  | -2.32061 | 1.87059  |
| H | 2.93335  | -1.72672 | 2.96809  |
| H | 0.94384  | -1.19347 | 1.58920  |
| H | 3.20630  | -1.93927 | -1.98449 |
| H | 5.22178  | -2.43245 | -0.60827 |
| C | 0.23013  | 0.89610  | -0.10896 |
| O | -0.50037 | 1.62137  | 0.55181  |
| O | 1.49443  | 1.16465  | -0.42828 |
| C | 2.25760  | 2.26493  | 0.21234  |
| C | 3.66814  | 2.02117  | -0.31943 |
| C | 1.69686  | 3.59876  | -0.27612 |
| C | 2.22026  | 2.12935  | 1.73359  |
| H | 4.03046  | 1.03703  | -0.00762 |
| H | 3.68129  | 2.06834  | -1.41272 |
| H | 4.34599  | 2.78647  | 0.07036  |
| H | 2.33650  | 4.41310  | 0.07960  |
| H | 1.68244  | 3.62646  | -1.37045 |
| H | 0.68416  | 3.75939  | 0.09727  |
| H | 2.58131  | 1.14290  | 2.03742  |
| H | 2.88059  | 2.88566  | 2.16993  |
| H | 1.21369  | 2.27954  | 2.12588  |

#### 4q\_conformer-015

|   |          |          |          |
|---|----------|----------|----------|
| C | 1.99952  | -0.99003 | -0.50938 |
| C | 2.29554  | -1.44730 | -1.78034 |
| C | 3.57095  | -0.92437 | -2.14241 |
| C | 4.02749  | -0.15764 | -1.08396 |
| N | 3.07036  | -0.22015 | -0.09847 |
| H | 4.10472  | -1.08944 | -3.06932 |
| C | 5.28239  | 0.63636  | -0.91549 |
| H | 3.06624  | 0.31751  | 0.75777  |
| H | 5.07487  | 1.70352  | -0.76298 |
| H | 5.87222  | 0.29417  | -0.05549 |
| H | 5.90591  | 0.54168  | -1.80872 |
| C | 0.80751  | -1.28872 | 0.34236  |
| H | 1.66370  | -2.09856 | -2.37056 |
| N | -0.12818 | -0.11213 | 0.43456  |
| H | 0.23332  | -2.03451 | -0.20423 |
| C | 1.13379  | -1.88789 | 1.73402  |
| C | -0.14217 | -2.12499 | 2.54963  |
| C | 1.91524  | -3.19501 | 1.55431  |
| H | 1.76145  | -1.17483 | 2.27595  |
| H | 2.15857  | -3.62997 | 2.52969  |
| H | 1.32108  | -3.93091 | 0.99723  |

|   |          |          |          |
|---|----------|----------|----------|
| H | 2.84947  | -3.03399 | 1.00843  |
| H | -0.82188 | -2.80863 | 2.02517  |
| H | -0.68175 | -1.19323 | 2.74563  |
| H | 0.10349  | -2.57713 | 3.51641  |
| C | 0.34675  | 1.10779  | 0.92719  |
| O | 1.34026  | 1.15507  | 1.64955  |
| C | -1.32955 | 4.79577  | -0.45320 |
| C | -1.31107 | 3.68784  | -1.30492 |
| C | -0.80480 | 2.47092  | -0.85542 |
| C | -0.30254 | 2.36015  | 0.44851  |
| C | -0.29693 | 3.47897  | 1.28986  |
| C | -0.82272 | 4.68971  | 0.84478  |
| H | -1.73252 | 5.74174  | -0.80278 |
| H | -1.68935 | 3.77310  | -2.31905 |
| H | -0.77884 | 1.61305  | -1.51983 |
| H | 0.11394  | 3.38542  | 2.28964  |
| H | -0.83271 | 5.55096  | 1.50591  |
| C | -1.51325 | -0.28890 | 0.25836  |
| O | -2.34580 | 0.42606  | 0.78569  |
| O | -1.75630 | -1.33132 | -0.53855 |
| C | -3.13917 | -1.79774 | -0.80182 |
| C | -3.80980 | -2.20093 | 0.51027  |
| C | -3.90456 | -0.70772 | -1.55020 |
| C | -2.90330 | -3.01509 | -1.69250 |
| H | -3.19941 | -2.94055 | 1.03853  |
| H | -3.96623 | -1.33865 | 1.15936  |
| H | -4.78116 | -2.65498 | 0.28966  |
| H | -4.05972 | 0.16886  | -0.92022 |
| H | -3.35547 | -0.40880 | -2.44910 |
| H | -4.87942 | -1.09921 | -1.85827 |
| H | -2.37156 | -2.72792 | -2.60483 |
| H | -2.31226 | -3.77018 | -1.16482 |
| H | -3.86329 | -3.45824 | -1.97348 |

#### 4q\_conformer-016

|   |         |          |          |
|---|---------|----------|----------|
| C | 1.59397 | -1.60111 | -0.00257 |
| C | 1.87919 | -2.92853 | -0.26277 |
| C | 2.52096 | -2.99065 | -1.53544 |
| C | 2.60637 | -1.69991 | -2.02735 |
| N | 2.05129 | -0.87135 | -1.07979 |
| H | 2.88021 | -3.87709 | -2.04191 |
| C | 3.15609 | -1.16757 | -3.31108 |
| H | 1.89371 | 0.12135  | -1.17685 |
| H | 3.56151 | -1.98628 | -3.91189 |
| H | 2.38595 | -0.66274 | -3.90897 |

|   |          |          |          |
|---|----------|----------|----------|
| H | 3.96275  | -0.44255 | -3.14237 |
| C | 0.95413  | -0.98268 | 1.20050  |
| H | 1.65829  | -3.75542 | 0.39971  |
| N | -0.34277 | -0.31401 | 0.85045  |
| H | 0.63453  | -1.80756 | 1.83929  |
| C | 1.88359  | -0.09712 | 2.06603  |
| C | 1.12804  | 0.49845  | 3.26096  |
| C | 3.07467  | -0.93560 | 2.54681  |
| H | 2.27434  | 0.71875  | 1.45064  |
| H | 3.75143  | -0.31926 | 3.14805  |
| H | 2.73675  | -1.77249 | 3.17104  |
| H | 3.63986  | -1.34932 | 1.70693  |
| H | 1.81491  | 1.06652  | 3.89730  |
| H | 0.32310  | 1.17443  | 2.95776  |
| H | 0.68218  | -0.29710 | 3.87067  |
| C | -1.52158 | -1.05216 | 1.07164  |
| O | -1.54578 | -1.97279 | 1.87833  |
| C | -4.93217 | -0.40375 | -1.43455 |
| C | -3.64970 | -0.21758 | -1.95739 |
| C | -2.53283 | -0.38904 | -1.14314 |
| C | -2.69451 | -0.75889 | 0.19926  |
| C | -3.97935 | -0.97164 | 0.71236  |
| C | -5.09562 | -0.78048 | -0.09877 |
| H | -5.80226 | -0.26158 | -2.06870 |
| H | -3.52003 | 0.05901  | -2.99926 |
| H | -1.53645 | -0.25589 | -1.55315 |
| H | -4.09037 | -1.27839 | 1.74714  |
| H | -6.09144 | -0.92977 | 0.30743  |
| C | -0.44182 | 1.03591  | 0.49301  |
| O | -1.40714 | 1.72783  | 0.75678  |
| O | 0.65885  | 1.44348  | -0.15637 |
| C | 0.86083  | 2.87562  | -0.50996 |
| C | 0.86388  | 3.72141  | 0.76159  |
| C | 2.24286  | 2.86095  | -1.15968 |
| C | -0.20984 | 3.30200  | -1.51194 |
| H | -0.11590 | 3.72454  | 1.24038  |
| H | 1.60820  | 3.34451  | 1.47042  |
| H | 1.12959  | 4.75127  | 0.50320  |
| H | 2.24439  | 2.24465  | -2.06517 |
| H | 2.52391  | 3.87870  | -1.44528 |
| H | 2.99719  | 2.47656  | -0.46610 |
| H | -0.21916 | 2.61971  | -2.36824 |
| H | -1.19917 | 3.31154  | -1.05415 |
| H | 0.02199  | 4.30746  | -1.87755 |

4q\_conformer-017

|   |          |          |          |
|---|----------|----------|----------|
| C | -2.65173 | 0.31338  | 0.31118  |
| C | -3.64726 | 1.17525  | 0.73631  |
| C | -4.47895 | 1.45625  | -0.38801 |
| C | -3.96664 | 0.76620  | -1.47379 |
| N | -2.86548 | 0.07419  | -1.02850 |
| H | -5.34949 | 2.09913  | -0.41072 |
| C | -4.41423 | 0.70506  | -2.89857 |
| H | -2.24089 | -0.50985 | -1.57524 |
| H | -4.66406 | -0.31842 | -3.20699 |
| H | -5.30595 | 1.32286  | -3.03649 |
| H | -3.64235 | 1.07178  | -3.58773 |
| C | -1.54624 | -0.32268 | 1.09523  |
| H | -3.75626 | 1.55698  | 1.74322  |
| N | -0.20050 | -0.14718 | 0.46470  |
| H | -1.44557 | 0.27192  | 2.00293  |
| C | -1.80133 | -1.78754 | 1.57288  |
| C | -2.59343 | -1.72459 | 2.88758  |
| C | -2.53533 | -2.70027 | 0.58157  |
| H | -0.81505 | -2.21950 | 1.78950  |
| H | -2.66676 | -3.69176 | 1.02934  |
| H | -3.53008 | -2.30050 | 0.35656  |
| H | -1.99524 | -2.81806 | -0.35823 |
| H | -2.80524 | -2.73170 | 3.26206  |
| H | -2.04366 | -1.17970 | 3.66334  |
| H | -3.55164 | -1.21481 | 2.72917  |
| C | 0.25913  | -0.98813 | -0.56727 |
| O | -0.50910 | -1.44590 | -1.40959 |
| C | 4.36288  | -2.19624 | -0.57539 |
| C | 3.73586  | -1.90297 | 0.63878  |
| C | 2.40534  | -1.49141 | 0.65425  |
| C | 1.69188  | -1.38363 | -0.54698 |
| C | 2.31377  | -1.70747 | -1.75918 |
| C | 3.64981  | -2.09977 | -1.77398 |
| H | 5.40367  | -2.50572 | -0.58697 |
| H | 4.28366  | -1.99367 | 1.57166  |
| H | 1.91650  | -1.26177 | 1.59537  |
| H | 1.74631  | -1.63033 | -2.68045 |
| H | 4.13557  | -2.33122 | -2.71692 |
| C | 0.49378  | 1.02271  | 0.81234  |
| O | 0.22483  | 1.68678  | 1.79770  |
| O | 1.41613  | 1.30470  | -0.10920 |
| C | 2.45999  | 2.33289  | 0.10995  |
| C | 3.21485  | 2.05102  | 1.40810  |
| C | 3.36695  | 2.12808  | -1.10162 |
| C | 1.80667  | 3.71308  | 0.09470  |

|   |         |         |          |
|---|---------|---------|----------|
| H | 2.56900 | 2.16938 | 2.27942  |
| H | 3.62278 | 1.03603 | 1.39795  |
| H | 4.04854 | 2.75525 | 1.49383  |
| H | 3.78252 | 1.11586 | -1.10274 |
| H | 2.80763 | 2.27713 | -2.03043 |
| H | 4.19087 | 2.84745 | -1.07219 |
| H | 1.23622 | 3.85286 | -0.82920 |
| H | 1.13771 | 3.83784 | 0.94771  |
| H | 2.58336 | 4.48359 | 0.13920  |

#### 4q\_conformer-018

|   |          |          |          |
|---|----------|----------|----------|
| C | 2.55045  | -0.19402 | -0.63491 |
| C | 3.20110  | -0.00297 | -1.84175 |
| C | 4.25046  | 0.93584  | -1.62862 |
| C | 4.22009  | 1.30134  | -0.29368 |
| N | 3.20264  | 0.59152  | 0.29759  |
| H | 4.95495  | 1.30558  | -2.36221 |
| C | 5.05544  | 2.27031  | 0.47907  |
| H | 2.83097  | 0.75901  | 1.22229  |
| H | 5.56673  | 1.78857  | 1.32220  |
| H | 5.81823  | 2.70692  | -0.17138 |
| H | 4.45488  | 3.09233  | 0.89000  |
| C | 1.45753  | -1.17208 | -0.34378 |
| H | 2.95643  | -0.51014 | -2.76627 |
| N | 0.13131  | -0.54241 | -0.02102 |
| H | 1.25656  | -1.65013 | -1.30399 |
| C | 1.79965  | -2.32980 | 0.63161  |
| C | 2.99285  | -3.12350 | 0.08565  |
| C | 2.03498  | -1.92094 | 2.08817  |
| H | 0.92133  | -2.98870 | 0.60684  |
| H | 2.16763  | -2.81794 | 2.70375  |
| H | 2.94214  | -1.31541 | 2.18986  |
| H | 1.19790  | -1.34625 | 2.49017  |
| H | 3.16691  | -4.01635 | 0.69587  |
| H | 2.82170  | -3.44644 | -0.94780 |
| H | 3.90563  | -2.51798 | 0.10102  |
| C | 0.01404  | 0.64223  | 0.72559  |
| O | 0.81215  | 0.92373  | 1.61331  |
| C | -2.99328 | 3.49137  | -0.35406 |
| C | -2.39384 | 2.71319  | -1.34813 |
| C | -1.43142 | 1.76571  | -1.00612 |
| C | -1.05467 | 1.60301  | 0.33305  |
| C | -1.63105 | 2.40758  | 1.32265  |
| C | -2.60935 | 3.33853  | 0.98142  |
| H | -3.75246 | 4.22071  | -0.62037 |

|   |          |          |          |
|---|----------|----------|----------|
| H | -2.67720 | 2.84349  | -2.38810 |
| H | -0.96393 | 1.15976  | -1.77577 |
| H | -1.31833 | 2.28229  | 2.35398  |
| H | -3.07078 | 3.94635  | 1.75375  |
| C | -0.99200 | -1.28975 | -0.40811 |
| O | -0.93359 | -2.19016 | -1.22836 |
| O | -2.06687 | -0.91978 | 0.28892  |
| C | -3.42938 | -1.38505 | -0.06071 |
| C | -4.30112 | -0.54342 | 0.86877  |
| C | -3.73805 | -1.07303 | -1.52433 |
| C | -3.54105 | -2.87376 | 0.26134  |
| H | -4.04051 | -0.73055 | 1.91512  |
| H | -4.16585 | 0.52211  | 0.66028  |
| H | -5.35422 | -0.80104 | 0.72085  |
| H | -3.10360 | -1.65017 | -2.19845 |
| H | -4.78367 | -1.32588 | -1.72742 |
| H | -3.59800 | -0.00671 | -1.72377 |
| H | -2.89338 | -3.46384 | -0.38912 |
| H | -3.26308 | -3.05838 | 1.30407  |
| H | -4.57646 | -3.20004 | 0.11881  |

#### 4q\_conformer-019

|   |          |          |          |
|---|----------|----------|----------|
| C | 1.84512  | -1.20377 | -0.58547 |
| C | 2.05121  | -1.27390 | -1.95089 |
| C | 3.33029  | -0.70952 | -2.22726 |
| C | 3.88537  | -0.31024 | -1.02389 |
| N | 2.96992  | -0.61744 | -0.04257 |
| H | 3.80396  | -0.61196 | -3.19532 |
| C | 5.19805  | 0.32948  | -0.70645 |
| H | 3.09321  | -0.41146 | 0.93708  |
| H | 5.07296  | 1.31413  | -0.23721 |
| H | 5.79964  | -0.28354 | -0.02334 |
| H | 5.77330  | 0.47030  | -1.62545 |
| C | 0.63793  | -1.60360 | 0.21403  |
| H | 1.34861  | -1.68218 | -2.66577 |
| N | -0.52267 | -0.70689 | -0.09465 |
| H | 0.29605  | -2.56819 | -0.16637 |
| C | 0.87448  | -1.76396 | 1.73285  |
| C | -0.44234 | -1.99474 | 2.48295  |
| C | 1.83915  | -2.93220 | 1.98697  |
| H | 1.31753  | -0.83855 | 2.12017  |
| H | 2.04439  | -3.02913 | 3.05823  |
| H | 1.39495  | -3.87481 | 1.64391  |
| H | 2.79393  | -2.80510 | 1.46880  |
| H | -0.97202 | -2.86883 | 2.08563  |

|   |          |          |          |
|---|----------|----------|----------|
| H | -1.10896 | -1.13145 | 2.40824  |
| H | -0.24396 | -2.17469 | 3.54472  |
| C | -1.72119 | -1.30481 | -0.50135 |
| O | -1.75956 | -2.48350 | -0.84048 |
| C | -5.43407 | 0.81232  | -0.17025 |
| C | -4.40947 | 1.08289  | 0.74055  |
| C | -3.18317 | 0.43274  | 0.62548  |
| C | -2.97743 | -0.50333 | -0.39735 |
| C | -4.01550 | -0.79032 | -1.29167 |
| C | -5.23476 | -0.12429 | -1.18758 |
| H | -6.38700 | 1.32597  | -0.08351 |
| H | -4.56602 | 1.79947  | 1.54108  |
| H | -2.39346 | 0.64491  | 1.33896  |
| H | -3.85264 | -1.53242 | -2.06603 |
| H | -6.03037 | -0.33913 | -1.89459 |
| C | -0.32114 | 0.67498  | -0.27334 |
| O | -0.89206 | 1.33178  | -1.12219 |
| O | 0.56683  | 1.12237  | 0.61631  |
| C | 1.07498  | 2.51490  | 0.54900  |
| C | 1.71962  | 2.77306  | -0.81246 |
| C | -0.07119 | 3.47740  | 0.85764  |
| C | 2.12008  | 2.54056  | 1.66167  |
| H | 2.44933  | 1.99142  | -1.04419 |
| H | 0.97332  | 2.80733  | -1.60692 |
| H | 2.24084  | 3.73545  | -0.78069 |
| H | -0.83731 | 3.43729  | 0.08248  |
| H | -0.52591 | 3.22950  | 1.82249  |
| H | 0.32001  | 4.49833  | 0.91515  |
| H | 1.67368  | 2.25052  | 2.61772  |
| H | 2.94545  | 1.85932  | 1.43710  |
| H | 2.52796  | 3.55084  | 1.76004  |

#### 4q\_conformer-020

|   |         |          |          |
|---|---------|----------|----------|
| C | 2.60281 | -0.70457 | -0.56743 |
| C | 3.40365 | -0.86838 | -1.68491 |
| C | 4.47456 | 0.06634  | -1.59602 |
| C | 4.30492 | 0.78707  | -0.42645 |
| N | 3.18176 | 0.29437  | 0.19350  |
| H | 5.28202 | 0.20350  | -2.30345 |
| C | 5.09661 | 1.91099  | 0.16012  |
| H | 2.72295 | 0.70456  | 0.99547  |
| H | 5.95132 | 2.14040  | -0.48211 |
| H | 4.49717 | 2.82541  | 0.25966  |
| H | 5.48154 | 1.66493  | 1.15803  |
| C | 1.40339 | -1.51917 | -0.19131 |

|   |          |          |          |
|---|----------|----------|----------|
| H | 3.23624  | -1.59693 | -2.46798 |
| N | 0.10403  | -0.76062 | -0.18101 |
| H | 1.26445  | -2.18761 | -1.04109 |
| C | 1.56404  | -2.44712 | 1.04398  |
| C | 1.80143  | -1.75601 | 2.38981  |
| C | 0.38396  | -3.42373 | 1.14291  |
| H | 2.46324  | -3.03273 | 0.80699  |
| H | 0.57524  | -4.17210 | 1.91928  |
| H | -0.54124 | -2.90163 | 1.41245  |
| H | 0.21128  | -3.94889 | 0.19750  |
| H | 1.95917  | -2.51431 | 3.16539  |
| H | 2.68596  | -1.11367 | 2.36724  |
| H | 0.94521  | -1.14169 | 2.67970  |
| C | -0.95098 | -1.29636 | -0.95132 |
| O | -0.73133 | -2.08426 | -1.86207 |
| C | -5.01080 | -0.46622 | 0.14025  |
| C | -4.04093 | -0.57636 | 1.14000  |
| C | -2.71186 | -0.81898 | 0.79928  |
| C | -2.34897 | -0.96837 | -0.54531 |
| C | -3.32817 | -0.89143 | -1.54213 |
| C | -4.65236 | -0.62456 | -1.20136 |
| H | -6.04418 | -0.26515 | 0.40642  |
| H | -4.31873 | -0.47102 | 2.18427  |
| H | -1.95959 | -0.89681 | 1.57767  |
| H | -3.03799 | -1.02662 | -2.57869 |
| H | -5.40522 | -0.54428 | -1.97956 |
| C | 0.03833  | 0.52723  | 0.36320  |
| O | 0.73557  | 0.89983  | 1.29435  |
| O | -0.83291 | 1.27873  | -0.30547 |
| C | -1.21720 | 2.63772  | 0.14922  |
| C | -1.72445 | 2.60129  | 1.58991  |
| C | -0.01953 | 3.56808  | -0.03193 |
| C | -2.34912 | 2.98451  | -0.81537 |
| H | -2.54599 | 1.88616  | 1.68687  |
| H | -0.93091 | 2.33334  | 2.28842  |
| H | -2.10151 | 3.59447  | 1.85434  |
| H | 0.34023  | 3.52729  | -1.06503 |
| H | -0.32284 | 4.59715  | 0.18658  |
| H | 0.79570  | 3.29241  | 0.63926  |
| H | -1.99447 | 2.95971  | -1.85037 |
| H | -3.17287 | 2.27184  | -0.71075 |
| H | -2.72320 | 3.98972  | -0.59927 |

4q\_conformer-021

|   |         |          |          |
|---|---------|----------|----------|
| C | 2.62306 | -0.46030 | -0.66076 |
|---|---------|----------|----------|



|   |          |          |          |
|---|----------|----------|----------|
| C | 3.29575  | -0.45590 | -1.87070 |
| C | 4.35306  | 0.49383  | -1.77837 |
| C | 4.30169  | 1.05682  | -0.51474 |
| N | 3.26124  | 0.45676  | 0.15316  |
| H | 5.07437  | 0.74442  | -2.54529 |
| C | 5.13985  | 2.11653  | 0.12439  |
| H | 2.90279  | 0.72757  | 1.05892  |
| H | 5.90958  | 2.45502  | -0.57458 |
| H | 4.54316  | 2.99084  | 0.41543  |
| H | 5.64350  | 1.75159  | 1.02872  |
| C | 1.47620  | -1.33682 | -0.26451 |
| H | 3.05336  | -1.08293 | -2.71924 |
| N | 0.20131  | -0.57929 | -0.00970 |
| H | 1.22953  | -1.88424 | -1.17460 |
| C | 1.78145  | -2.43231 | 0.79812  |
| C | 2.35226  | -1.96113 | 2.13934  |
| C | 0.55741  | -3.33046 | 1.02499  |
| H | 2.55699  | -3.03924 | 0.30977  |
| H | 0.82125  | -4.17104 | 1.67534  |
| H | -0.25025 | -2.77518 | 1.51719  |
| H | 0.16778  | -3.73441 | 0.08544  |
| H | 2.61948  | -2.83541 | 2.74429  |
| H | 3.25602  | -1.35981 | 2.00684  |
| H | 1.62638  | -1.36389 | 2.69521  |
| C | 0.15607  | 0.55193  | 0.80720  |
| O | 0.97548  | 0.73285  | 1.70471  |
| C | -2.62945 | 3.68365  | -0.06920 |
| C | -2.02184 | 2.98853  | -1.11789 |
| C | -1.13705 | 1.94712  | -0.84429 |
| C | -0.84534 | 1.60852  | 0.48275  |
| C | -1.42557 | 2.33038  | 1.53154  |
| C | -2.32935 | 3.35388  | 1.25582  |
| H | -3.32882 | 4.48618  | -0.28367 |
| H | -2.23836 | 3.25583  | -2.14771 |
| H | -0.66501 | 1.40394  | -1.65719 |
| H | -1.17555 | 2.07051  | 2.55490  |
| H | -2.79622 | 3.89756  | 2.07149  |
| C | -0.96328 | -1.13306 | -0.58406 |
| O | -0.93795 | -1.85561 | -1.56395 |
| O | -2.03423 | -0.81042 | 0.13776  |
| C | -3.41167 | -1.12731 | -0.31163 |
| C | -3.66326 | -0.56404 | -1.70917 |
| C | -3.61167 | -2.63957 | -0.24025 |
| C | -4.25929 | -0.39850 | 0.72849  |
| H | -3.45523 | 0.50931  | -1.73029 |
| H | -3.04816 | -1.06350 | -2.45875 |

|   |          |          |          |
|---|----------|----------|----------|
| H | -4.71685 | -0.71526 | -1.96519 |
| H | -3.37506 | -3.00735 | 0.76339  |
| H | -4.65815 | -2.87820 | -0.45647 |
| H | -2.97767 | -3.15253 | -0.96547 |
| H | -4.03683 | -0.76847 | 1.73418  |
| H | -4.05952 | 0.67695  | 0.69957  |
| H | -5.32082 | -0.56587 | 0.52291  |

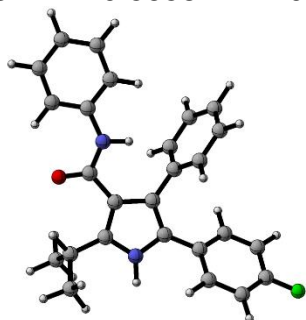

4r\_conformer-001

|   |          |          |          |
|---|----------|----------|----------|
| C | 1.79885  | 0.68867  | -0.01129 |
| C | 0.51714  | 0.16471  | 0.08305  |
| C | -0.40006 | 1.28164  | 0.06758  |
| C | 0.35914  | 2.45051  | -0.03444 |
| N | 1.66697  | 2.06540  | -0.09215 |
| H | 2.44777  | 2.70631  | -0.10696 |
| C | 5.62737  | -1.15694 | -0.03902 |
| C | 5.43253  | 0.00148  | -0.78001 |
| C | 4.17172  | 0.59446  | -0.77228 |
| C | 3.11491  | 0.04747  | -0.02249 |
| C | 3.35715  | -1.12150 | 0.72209  |
| C | 4.60793  | -1.73170 | 0.71151  |
| F | 6.84692  | -1.74375 | -0.04661 |
| H | 6.24971  | 0.41768  | -1.35908 |
| H | 4.00437  | 1.48067  | -1.37713 |
| H | 2.56189  | -1.54841 | 1.32176  |
| H | 4.80181  | -2.63152 | 1.28536  |
| C | -0.54147 | -3.99053 | 0.27373  |
| C | -0.90065 | -3.12676 | 1.31202  |
| C | -0.54262 | -1.78069 | 1.25828  |
| C | 0.17470  | -1.27221 | 0.16154  |
| C | 0.52972  | -2.15009 | -0.87550 |
| C | 0.17733  | -3.49883 | -0.81795 |
| H | -0.82159 | -5.03894 | 0.31516  |
| H | -1.45923 | -3.50175 | 2.16459  |
| H | -0.82499 | -1.10819 | 2.06280  |
| H | 1.07796  | -1.76370 | -1.72920 |
| H | 0.45747  | -4.16342 | -1.63007 |
| C | -0.05160 | 3.89682  | -0.05908 |

|   |          |          |          |
|---|----------|----------|----------|
| C | 0.90243  | 4.76557  | -0.89220 |
| H | 0.50781  | 5.78402  | -0.96499 |
| H | 1.89503  | 4.84062  | -0.43033 |
| H | 1.02556  | 4.37226  | -1.90678 |
| C | -1.87559 | 1.27918  | 0.07374  |
| O | -2.54232 | 2.25814  | 0.43302  |
| N | -2.45143 | 0.11319  | -0.37877 |
| H | -1.80610 | -0.61608 | -0.65233 |
| H | -1.04514 | 3.92742  | -0.51560 |
| C | -0.19382 | 4.44055  | 1.37600  |
| H | -0.52802 | 5.48421  | 1.35545  |
| H | -0.92783 | 3.84996  | 1.92986  |
| H | 0.76493  | 4.39937  | 1.90643  |
| C | -6.42344 | -1.28084 | -0.25779 |
| C | -6.16514 | 0.07156  | -0.02931 |
| C | -4.86391 | 0.57517  | -0.06196 |
| C | -3.79410 | -0.29537 | -0.32193 |
| C | -4.05106 | -1.65857 | -0.54983 |
| C | -5.35519 | -2.14289 | -0.52001 |
| H | -7.44102 | -1.65881 | -0.23274 |
| H | -6.98655 | 0.75335  | 0.17380  |
| H | -4.66410 | 1.62224  | 0.11215  |
| H | -3.22083 | -2.33462 | -0.73920 |
| H | -5.53495 | -3.19938 | -0.69779 |

4r\_conformer-002

|   |          |          |          |
|---|----------|----------|----------|
| C | -1.79883 | 0.68867  | -0.01127 |
| C | -0.51712 | 0.16472  | 0.08310  |
| C | 0.40007  | 1.28165  | 0.06766  |
| C | -0.35913 | 2.45052  | -0.03437 |
| N | -1.66696 | 2.06539  | -0.09212 |
| H | -2.44777 | 2.70629  | -0.10696 |
| C | -5.62733 | -1.15698 | -0.03910 |
| C | -5.43248 | 0.00143  | -0.78010 |
| C | -4.17168 | 0.59443  | -0.77234 |
| C | -3.11488 | 0.04745  | -0.02251 |
| C | -3.35714 | -1.12151 | 0.72208  |
| C | -4.60791 | -1.73172 | 0.71147  |
| F | -6.84687 | -1.74380 | -0.04672 |
| H | -6.24965 | 0.41762  | -1.35919 |
| H | -4.00431 | 1.48063  | -1.37719 |
| H | -2.56189 | -1.54841 | 1.32177  |
| H | -4.80180 | -2.63153 | 1.28532  |
| C | 0.54146  | -3.99053 | 0.27383  |
| C | 0.90063  | -3.12676 | 1.31213  |

|   |          |          |          |
|---|----------|----------|----------|
| C | 0.54261  | -1.78068 | 1.25837  |
| C | -0.17468 | -1.27220 | 0.16161  |
| C | -0.52968 | -2.15008 | -0.87544 |
| C | -0.17731 | -3.49883 | -0.81787 |
| H | 0.82157  | -5.03894 | 0.31528  |
| H | 1.45918  | -3.50175 | 2.16471  |
| H | 0.82496  | -1.10818 | 2.06288  |
| H | -1.07790 | -1.76370 | -1.72915 |
| H | -0.45743 | -4.16343 | -1.62999 |
| C | 0.05157  | 3.89683  | -0.05901 |
| C | 0.19338  | 4.44069  | 1.37606  |
| H | 0.52757  | 5.48437  | 1.35550  |
| H | -0.76550 | 4.39955  | 1.90623  |
| H | 0.92725  | 3.85019  | 1.93020  |
| C | 1.87561  | 1.27919  | 0.07383  |
| O | 2.54235  | 2.25813  | 0.43312  |
| N | 2.45143  | 0.11320  | -0.37872 |
| H | 1.80610  | -0.61606 | -0.65228 |
| H | 1.04522  | 3.92744  | -0.51528 |
| C | -0.90229 | 4.76548  | -0.89244 |
| H | -0.50769 | 5.78394  | -0.96522 |
| H | -1.02517 | 4.37207  | -1.90701 |
| H | -1.89500 | 4.84053  | -0.43081 |
| C | 6.42345  | -1.28082 | -0.25791 |
| C | 6.16516  | 0.07156  | -0.02936 |
| C | 4.86392  | 0.57517  | -0.06195 |
| C | 3.79411  | -0.29535 | -0.32194 |
| C | 4.05107  | -1.65855 | -0.54991 |
| C | 5.35519  | -2.14287 | -0.52015 |
| H | 7.44103  | -1.65879 | -0.23291 |
| H | 6.98657  | 0.75335  | 0.17376  |
| H | 4.66411  | 1.62223  | 0.11223  |
| H | 3.22083  | -2.33458 | -0.73930 |
| H | 5.53495  | -3.19935 | -0.69799 |

4r\_conformer-003

|   |          |          |          |
|---|----------|----------|----------|
| C | -1.84524 | 0.81425  | -0.00021 |
| C | -0.58115 | 0.25259  | 0.11269  |
| C | 0.37283  | 1.33939  | 0.11589  |
| C | -0.34876 | 2.53362  | 0.00795  |
| N | -1.66616 | 2.18386  | -0.07523 |
| H | -2.42212 | 2.85485  | -0.10125 |
| C | -5.72614 | -0.91770 | -0.07585 |
| C | -5.48779 | 0.23332  | -0.81561 |
| C | -4.21044 | 0.78944  | -0.79195 |

|   |          |          |          |
|---|----------|----------|----------|
| C | -3.18008 | 0.21311  | -0.02754 |
| C | -3.46625 | -0.94689 | 0.71540  |
| C | -4.73400 | -1.52050 | 0.68908  |
| F | -6.96201 | -1.46890 | -0.09918 |
| H | -6.28475 | 0.67208  | -1.40610 |
| H | -4.00993 | 1.66971  | -1.39544 |
| H | -2.69162 | -1.39583 | 1.32587  |
| H | -4.96155 | -2.41334 | 1.26147  |
| C | 0.36879  | -3.92796 | 0.31445  |
| C | 0.74808  | -3.07113 | 1.35157  |
| C | 0.42389  | -1.71705 | 1.29519  |
| C | -0.28042 | -1.19309 | 0.19773  |
| C | -0.65596 | -2.06331 | -0.83828 |
| C | -0.33635 | -3.42056 | -0.77866 |
| H | 0.62352  | -4.98276 | 0.35778  |
| H | 1.29732  | -3.45827 | 2.20480  |
| H | 0.72290  | -1.05041 | 2.09860  |
| H | -1.19360 | -1.66511 | -1.69334 |
| H | -0.63203 | -4.07915 | -1.59018 |
| C | 0.03554  | 3.98974  | -0.04727 |
| C | 1.05084  | 4.28765  | -1.16342 |
| H | 1.23107  | 5.36678  | -1.22360 |
| H | 2.00278  | 3.79134  | -0.96189 |
| H | 0.67706  | 3.94798  | -2.13529 |
| C | 1.84710  | 1.23228  | 0.15984  |
| O | 2.57972  | 2.09667  | 0.65526  |
| N | 2.34438  | 0.08675  | -0.42008 |
| H | 1.65182  | -0.55011 | -0.79107 |
| H | -0.88631 | 4.53550  | -0.29166 |
| C | 0.52717  | 4.49931  | 1.32004  |
| H | 0.73751  | 5.57380  | 1.26776  |
| H | -0.23115 | 4.33640  | 2.09385  |
| H | 1.43884  | 3.97047  | 1.60565  |
| C | 6.15934  | -1.68770 | -0.24605 |
| C | 6.01777  | -0.33559 | 0.06978  |
| C | 4.77149  | 0.29087  | 0.02251  |
| C | 3.63926  | -0.45419 | -0.34033 |
| C | 3.77804  | -1.81644 | -0.65702 |
| C | 5.02924  | -2.42387 | -0.61216 |
| H | 7.13530  | -2.16213 | -0.20844 |
| H | 6.88877  | 0.24889  | 0.35343  |
| H | 4.66174  | 1.33777  | 0.26463  |
| H | 2.89790  | -2.39549 | -0.92563 |
| H | 5.11857  | -3.47805 | -0.85873 |

4r\_conformer-004

|   |          |          |          |
|---|----------|----------|----------|
| C | 1.84513  | 0.81435  | -0.00015 |
| C | 0.58112  | 0.25248  | 0.11270  |
| C | -0.37304 | 1.33909  | 0.11592  |
| C | 0.34837  | 2.53347  | 0.00817  |
| N | 1.66583  | 2.18393  | -0.07500 |
| H | 2.42167  | 2.85505  | -0.10092 |
| C | 5.72634  | -0.91696 | -0.07633 |
| C | 4.73431  | -1.52009 | 0.68848  |
| C | 3.46645  | -0.94671 | 0.71498  |
| C | 3.18008  | 0.21343  | -0.02765 |
| C | 4.21032  | 0.79013  | -0.79195 |
| C | 5.48775  | 0.23419  | -0.81581 |
| F | 6.96229  | -1.46796 | -0.09985 |
| H | 4.96200  | -2.41304 | 1.26064  |
| H | 2.69192  | -1.39595 | 1.32536  |
| H | 4.00967  | 1.67052  | -1.39521 |
| H | 6.28461  | 0.67324  | -1.40621 |
| C | -0.36758 | -3.92832 | 0.31470  |
| C | -0.74648 | -3.07170 | 1.35212  |
| C | -0.42275 | -1.71750 | 1.29561  |
| C | 0.28075  | -1.19330 | 0.19776  |
| C | 0.65595  | -2.06332 | -0.83853 |
| C | 0.33675  | -3.42066 | -0.77882 |
| H | -0.62196 | -4.98320 | 0.35813  |
| H | -1.29508 | -3.45905 | 2.20565  |
| H | -0.72149 | -1.05100 | 2.09924  |
| H | 1.19303  | -1.66493 | -1.69384 |
| H | 0.63214  | -4.07913 | -1.59054 |
| C | -0.03611 | 3.98956  | -0.04679 |
| C | -0.52766 | 4.49886  | 1.32065  |
| H | -0.73817 | 5.57332  | 1.26857  |
| H | -1.43923 | 3.96989  | 1.60632  |
| H | 0.23076  | 4.33594  | 2.09435  |
| C | -1.84726 | 1.23179  | 0.15996  |
| O | -2.57991 | 2.09605  | 0.65556  |
| N | -2.34450 | 0.08640  | -0.42026 |
| H | -1.65192 | -0.55056 | -0.79106 |
| H | 0.88559  | 4.53555  | -0.29118 |
| C | -1.05154 | 4.28754  | -1.16280 |
| H | -1.23191 | 5.36666  | -1.22282 |
| H | -0.67780 | 3.94808  | -2.13477 |
| H | -2.00342 | 3.79112  | -0.96132 |
| C | -6.15976 | -1.68745 | -0.24624 |
| C | -6.01825 | -0.33491 | 0.06778  |
| C | -4.77185 | 0.29130  | 0.02046  |

|   |          |          |          |
|---|----------|----------|----------|
| C | -3.63946 | -0.45443 | -0.34051 |
| C | -3.77820 | -1.81708 | -0.65542 |
| C | -5.02952 | -2.42429 | -0.61057 |
| H | -7.13580 | -2.16169 | -0.20862 |
| H | -6.88937 | 0.25008  | 0.34999  |
| H | -4.66219 | 1.33854  | 0.26115  |
| H | -2.89799 | -2.39663 | -0.92263 |
| H | -5.11885 | -3.47878 | -0.85573 |

4r\_conformer-005

|   |          |          |          |
|---|----------|----------|----------|
| C | -1.80248 | 0.70138  | -0.08638 |
| C | -0.52442 | 0.16445  | -0.14652 |
| C | 0.40124  | 1.27310  | -0.21390 |
| C | -0.35296 | 2.45166  | -0.20438 |
| N | -1.66157 | 2.07924  | -0.10899 |
| H | -2.43823 | 2.72312  | -0.15781 |
| C | -5.64433 | -1.11139 | 0.07259  |
| C | -5.44480 | 0.10316  | 0.71597  |
| C | -4.17993 | 0.68527  | 0.66585  |
| C | -3.12295 | 0.07152  | -0.03052 |
| C | -3.37033 | -1.15349 | -0.67713 |
| C | -4.62538 | -1.75257 | -0.62257 |
| F | -6.86788 | -1.68777 | 0.12266  |
| H | -6.26172 | 0.57138  | 1.25426  |
| H | -4.01064 | 1.61779  | 1.19590  |
| H | -2.57619 | -1.63406 | -1.23610 |
| H | -4.82261 | -2.69545 | -1.12121 |
| C | 0.46683  | -4.01156 | -0.07137 |
| C | 0.78869  | -3.23484 | -1.18775 |
| C | 0.45494  | -1.88167 | -1.21863 |
| C | -0.20064 | -1.27968 | -0.13053 |
| C | -0.51864 | -2.07058 | 0.98529  |
| C | -0.19020 | -3.42634 | 1.01306  |
| H | 0.72783  | -5.06541 | -0.04711 |
| H | 1.29900  | -3.68313 | -2.03513 |
| H | 0.70859  | -1.27600 | -2.08351 |
| H | -1.02004 | -1.61115 | 1.83158  |
| H | -0.44114 | -4.02335 | 1.88497  |
| C | 0.06819  | 3.89786  | -0.21397 |
| C | 0.62775  | 4.30616  | 1.16323  |
| H | 0.96151  | 5.34986  | 1.14155  |
| H | -0.14080 | 4.20843  | 1.93882  |
| H | 1.48032  | 3.67853  | 1.43519  |
| C | 1.87777  | 1.26094  | -0.22407 |
| O | 2.55001  | 2.23563  | -0.58442 |

|   |          |          |          |
|---|----------|----------|----------|
| N | 2.45054  | 0.09232  | 0.22448  |
| H | 1.80551  | -0.63456 | 0.50474  |
| H | 0.88611  | 3.97737  | -0.93448 |
| C | -1.06393 | 4.83997  | -0.64683 |
| H | -0.68218 | 5.86238  | -0.72756 |
| H | -1.47993 | 4.55681  | -1.61996 |
| H | -1.87966 | 4.85990  | 0.08708  |
| C | 6.42863  | -1.28931 | 0.18648  |
| C | 5.36013  | -2.14628 | 0.46398  |
| C | 4.05456  | -1.66522 | 0.46648  |
| C | 3.79542  | -0.31030 | 0.19427  |
| C | 4.86566  | 0.55507  | -0.08172 |
| C | 6.16856  | 0.05469  | -0.08522 |
| H | 7.44747  | -1.66468 | 0.18280  |
| H | 5.54096  | -3.19631 | 0.67575  |
| H | 3.22461  | -2.33767 | 0.66982  |
| H | 4.66485  | 1.59556  | -0.29010 |
| H | 6.98997  | 0.73265  | -0.30088 |

4r\_conformer-006

|   |          |          |          |
|---|----------|----------|----------|
| C | 1.80246  | 0.70143  | -0.08633 |
| C | 0.52442  | 0.16445  | -0.14630 |
| C | -0.40129 | 1.27306  | -0.21368 |
| C | 0.35287  | 2.45165  | -0.20432 |
| N | 1.66150  | 2.07928  | -0.10906 |
| H | 2.43813  | 2.72318  | -0.15796 |
| C | 5.64438  | -1.11122 | 0.07239  |
| C | 5.44491  | 0.10343  | 0.71562  |
| C | 4.18001  | 0.68549  | 0.66560  |
| C | 3.12295  | 0.07162  | -0.03054 |
| C | 3.37028  | -1.15348 | -0.67702 |
| C | 4.62535  | -1.75252 | -0.62254 |
| F | 6.86795  | -1.68756 | 0.12237  |
| H | 6.26189  | 0.57174  | 1.25374  |
| H | 4.01077  | 1.61808  | 1.19554  |
| H | 2.57608  | -1.63415 | -1.23582 |
| H | 4.82255  | -2.69547 | -1.12108 |
| C | -0.46637 | -4.01168 | -0.07093 |
| C | -0.78837 | -3.23504 | -1.18732 |
| C | -0.45480 | -1.88183 | -1.21826 |
| C | 0.20073  | -1.27970 | -0.13020 |
| C | 0.51884  | -2.07053 | 0.98565  |
| C | 0.19058  | -3.42633 | 1.01347  |
| H | -0.72723 | -5.06557 | -0.04663 |
| H | -1.29863 | -3.68343 | -2.03469 |



|   |          |          |          |
|---|----------|----------|----------|
| H | -0.70854 | -1.27622 | -2.08317 |
| H | 1.02021  | -1.61100 | 1.83190  |
| H | 0.44163  | -4.02327 | 1.88540  |
| C | -0.06828 | 3.89786  | -0.21408 |
| C | 1.06404  | 4.83993  | -0.64649 |
| H | 0.68235  | 5.86236  | -0.72736 |
| H | 1.87947  | 4.85981  | 0.08777  |
| H | 1.48042  | 4.55680  | -1.61947 |
| C | -1.87783 | 1.26080  | -0.22405 |
| O | -2.55010 | 2.23546  | -0.58442 |
| N | -2.45061 | 0.09213  | 0.22441  |
| H | -1.80560 | -0.63479 | 0.50461  |
| H | -0.88590 | 3.97739  | -0.93494 |
| C | -0.62833 | 4.30627  | 1.16290  |
| H | -0.96196 | 5.35001  | 1.14101  |
| H | -1.48104 | 3.67875  | 1.43460  |
| H | 0.13995  | 4.20854  | 1.93876  |
| C | -6.42879 | -1.28926 | 0.18616  |
| C | -6.16867 | 0.05487  | -0.08485 |
| C | -4.86573 | 0.55516  | -0.08126 |
| C | -3.79551 | -0.31045 | 0.19409  |
| C | -4.05471 | -1.66549 | 0.46562  |
| C | -5.36031 | -2.14646 | 0.46305  |
| H | -7.44766 | -1.66456 | 0.18241  |
| H | -6.99005 | 0.73301  | -0.30001 |
| H | -4.66486 | 1.59574  | -0.28909 |
| H | -3.22477 | -2.33810 | 0.66849  |
| H | -5.54119 | -3.19659 | 0.67428  |

4r\_conformer-007

|   |          |          |          |
|---|----------|----------|----------|
| C | -1.68956 | 0.72518  | -0.08770 |
| C | -0.71658 | -0.26391 | -0.17849 |
| C | 0.55363  | 0.40772  | -0.27194 |
| C | 0.31862  | 1.78154  | -0.26155 |
| N | -1.03746 | 1.94374  | -0.15835 |
| H | -1.50320 | 2.83547  | -0.06474 |
| C | -5.89971 | 0.55980  | 0.47192  |
| C | -5.09846 | -0.38573 | 1.10258  |
| C | -3.72060 | -0.32641 | 0.91739  |
| C | -3.14185 | 0.65855  | 0.09681  |
| C | -3.98691 | 1.59378  | -0.52595 |
| C | -5.36736 | 1.55443  | -0.33787 |
| F | -7.23973 | 0.50942  | 0.65460  |
| H | -5.55159 | -1.14105 | 1.73559  |
| H | -3.08278 | -1.04523 | 1.41837  |

|   |          |          |          |
|---|----------|----------|----------|
| H | -3.56627 | 2.34888  | -1.18349 |
| H | -6.02464 | 2.27105  | -0.81824 |
| C | -1.38065 | -4.50215 | -0.14429 |
| C | -0.40203 | -3.93617 | 0.67638  |
| C | -0.18588 | -2.55907 | 0.66306  |
| C | -0.94002 | -1.72090 | -0.17360 |
| C | -1.91531 | -2.30263 | -0.99967 |
| C | -2.13672 | -3.67892 | -0.98211 |
| H | -1.55108 | -5.57488 | -0.13230 |
| H | 0.19086  | -4.56745 | 1.33249  |
| H | 0.56763  | -2.12230 | 1.31190  |
| H | -2.49768 | -1.66658 | -1.65908 |
| H | -2.89603 | -4.10975 | -1.62892 |
| C | 1.24452  | 2.96095  | -0.39627 |
| C | 1.39267  | 3.71994  | 0.93685  |
| H | 2.10225  | 4.54685  | 0.82725  |
| H | 0.43268  | 4.13814  | 1.26079  |
| H | 1.75397  | 3.06316  | 1.73613  |
| C | 1.85804  | -0.26405 | -0.48085 |
| O | 2.00630  | -1.20621 | -1.26060 |
| N | 2.87992  | 0.25651  | 0.28412  |
| H | 2.60001  | 0.94649  | 0.96830  |
| H | 2.22656  | 2.56153  | -0.66891 |
| C | 0.79973  | 3.90732  | -1.52564 |
| H | 1.53329  | 4.71021  | -1.65286 |
| H | 0.70583  | 3.37030  | -2.47473 |
| H | -0.16595 | 4.37632  | -1.30344 |
| C | 7.01559  | -0.55006 | 0.36857  |
| C | 6.19212  | -1.27480 | -0.49390 |
| C | 4.81737  | -1.04106 | -0.54886 |
| C | 4.25235  | -0.05578 | 0.27568  |
| C | 5.07911  | 0.67575  | 1.14440  |
| C | 6.44771  | 0.42776  | 1.18929  |
| H | 8.08342  | -0.74343 | 0.40252  |
| H | 6.61960  | -2.03931 | -1.13686 |
| H | 4.17972  | -1.60647 | -1.21200 |
| H | 4.64368  | 1.44122  | 1.78213  |
| H | 7.07080  | 1.00355  | 1.86754  |

4r\_conformer-008

|   |          |          |          |
|---|----------|----------|----------|
| C | 1.68953  | 0.72519  | -0.08765 |
| C | 0.71662  | -0.26397 | -0.17834 |
| C | -0.55366 | 0.40757  | -0.27172 |
| C | -0.31873 | 1.78141  | -0.26139 |
| N | 1.03734  | 1.94371  | -0.15829 |

|   |          |          |          |
|---|----------|----------|----------|
| H | 1.50302  | 2.83547  | -0.06476 |
| C | 5.89977  | 0.56015  | 0.47144  |
| C | 5.09867  | -0.38543 | 1.10222  |
| C | 3.72078  | -0.32621 | 0.91722  |
| C | 3.14185  | 0.65868  | 0.09668  |
| C | 3.98676  | 1.59396  | -0.52622 |
| C | 5.36723  | 1.55471  | -0.33831 |
| F | 7.23982  | 0.50987  | 0.65393  |
| H | 5.55193  | -1.14070 | 1.73519  |
| H | 3.08309  | -1.04507 | 1.41830  |
| H | 3.56597  | 2.34900  | -1.18372 |
| H | 6.02439  | 2.27136  | -0.81880 |
| C | 1.38106  | -4.50215 | -0.14385 |
| C | 0.40252  | -3.93617 | 0.67693  |
| C | 0.18624  | -2.55909 | 0.66350  |
| C | 0.94016  | -1.72094 | -0.17336 |
| C | 1.91538  | -2.30266 | -0.99954 |
| C | 2.13692  | -3.67894 | -0.98187 |
| H | 1.55158  | -5.57485 | -0.13177 |
| H | -0.19021 | -4.56744 | 1.33320  |
| H | -0.56721 | -2.12232 | 1.31242  |
| H | 2.49758  | -1.66663 | -1.65909 |
| H | 2.89616  | -4.10977 | -1.62876 |
| C | -1.24472 | 2.96077  | -0.39592 |
| C | -0.79981 | 3.90760  | -1.52486 |
| H | -0.70562 | 3.37093  | -2.47411 |
| H | -1.53345 | 4.71042  | -1.65196 |
| H | 0.16575  | 4.37667  | -1.30227 |
| C | -1.85800 | -0.26434 | -0.48056 |
| O | -2.00610 | -1.20679 | -1.25999 |
| N | -2.88003 | 0.25644  | 0.28407  |
| H | -2.60031 | 0.94682  | 0.96791  |
| H | -2.22667 | 2.56135  | -0.66892 |
| C | -1.39321 | 3.71928  | 0.93744  |
| H | -0.43334 | 4.13756  | 1.26161  |
| H | -2.10295 | 4.54608  | 0.82803  |
| H | -1.75443 | 3.06218  | 1.73648  |
| C | -7.01573 | -0.55001 | 0.36786  |
| C | -6.44817 | 0.42878  | 1.18764  |
| C | -5.07956 | 0.67674  | 1.14295  |
| C | -4.25247 | -0.05581 | 0.27541  |
| C | -4.81717 | -1.04208 | -0.54817 |
| C | -6.19194 | -1.27576 | -0.49344 |
| H | -8.08358 | -0.74335 | 0.40165  |
| H | -7.07151 | 1.00538  | 1.86497  |
| H | -4.64438 | 1.44300  | 1.77991  |

|   |          |          |          |
|---|----------|----------|----------|
| H | -4.17926 | -1.60825 | -1.21042 |
| H | -6.61917 | -2.04103 | -1.13565 |

4r\_conformer-009

|   |          |          |          |
|---|----------|----------|----------|
| C | 1.78396  | 0.81549  | -0.12017 |
| C | 0.77557  | -0.13764 | -0.22818 |
| C | -0.46599 | 0.57820  | -0.35421 |
| C | -0.18420 | 1.94229  | -0.34598 |
| N | 1.17649  | 2.05267  | -0.21441 |
| H | 1.66386  | 2.93303  | -0.11766 |
| C | 5.97053  | 0.49257  | 0.54119  |
| C | 5.11803  | -0.41493 | 1.16041  |
| C | 3.74835  | -0.30329 | 0.94163  |
| C | 3.22799  | 0.69535  | 0.09866  |
| C | 4.12391  | 1.59049  | -0.51185 |
| C | 5.49688  | 1.49926  | -0.28985 |
| F | 7.30297  | 0.39182  | 0.75657  |
| H | 5.52594  | -1.18131 | 1.81068  |
| H | 3.07092  | -0.99179 | 1.43329  |
| H | 3.74901  | 2.35480  | -1.18608 |
| H | 6.19301  | 2.18498  | -0.76053 |
| C | 1.21985  | -4.40494 | -0.21034 |
| C | 0.22432  | -3.79684 | 0.55760  |
| C | 0.08371  | -2.40968 | 0.55294  |
| C | 0.93111  | -1.60275 | -0.22377 |
| C | 1.92231  | -2.22736 | -0.99895 |
| C | 2.06882  | -3.61334 | -0.98799 |
| H | 1.33191  | -5.48534 | -0.20465 |
| H | -0.44077 | -4.40259 | 1.16684  |
| H | -0.68309 | -1.94195 | 1.16374  |
| H | 2.57540  | -1.61687 | -1.61459 |
| H | 2.84187  | -4.07690 | -1.59465 |
| C | -1.02319 | 3.18721  | -0.49890 |
| C | -1.62234 | 3.66087  | 0.83967  |
| H | -0.85125 | 3.74772  | 1.61175  |
| H | -2.09689 | 4.64031  | 0.71492  |
| H | -2.39028 | 2.96836  | 1.20008  |
| C | -1.77980 | -0.07516 | -0.59718 |
| O | -1.97108 | -0.85315 | -1.53135 |
| N | -2.74040 | 0.25359  | 0.33125  |
| H | -2.41578 | 0.82679  | 1.09860  |
| H | -0.33310 | 3.97308  | -0.83447 |
| C | -2.10787 | 3.04769  | -1.57906 |
| H | -2.87630 | 2.32684  | -1.28504 |
| H | -2.60091 | 4.01273  | -1.73701 |

|   |          |          |          |
|---|----------|----------|----------|
| H | -1.67720 | 2.72022  | -2.53052 |
| C | -6.83726 | -0.70151 | 0.58346  |
| C | -6.08496 | -1.18001 | -0.48998 |
| C | -4.72490 | -0.89000 | -0.60643 |
| C | -4.10295 | -0.10021 | 0.37266  |
| C | -4.85729 | 0.38244  | 1.45442  |
| C | -6.21240 | 0.08242  | 1.55660  |
| H | -7.89443 | -0.93582 | 0.66263  |
| H | -6.55750 | -1.79194 | -1.25336 |
| H | -4.14156 | -1.26608 | -1.43371 |
| H | -4.37672 | 0.99291  | 2.21490  |
| H | -6.77986 | 0.46433  | 2.40030  |

4r\_conformer-010

|   |          |          |          |
|---|----------|----------|----------|
| C | -1.78396 | 0.81549  | -0.12017 |
| C | -0.77556 | -0.13764 | -0.22817 |
| C | 0.46600  | 0.57822  | -0.35421 |
| C | 0.18419  | 1.94230  | -0.34601 |
| N | -1.17650 | 2.05268  | -0.21443 |
| H | -1.66387 | 2.93303  | -0.11768 |
| C | -5.97053 | 0.49254  | 0.54120  |
| C | -5.49688 | 1.49923  | -0.28984 |
| C | -4.12391 | 1.59048  | -0.51184 |
| C | -3.22799 | 0.69534  | 0.09866  |
| C | -3.74834 | -0.30329 | 0.94164  |
| C | -5.11802 | -0.41495 | 1.16042  |
| F | -7.30296 | 0.39178  | 0.75658  |
| H | -6.19302 | 2.18495  | -0.76052 |
| H | -3.74903 | 2.35479  | -1.18607 |
| H | -3.07091 | -0.99180 | 1.43330  |
| H | -5.52592 | -1.18132 | 1.81069  |
| C | -1.21983 | -4.40494 | -0.21034 |
| C | -2.06880 | -3.61333 | -0.98800 |
| C | -1.92230 | -2.22735 | -0.99895 |
| C | -0.93110 | -1.60274 | -0.22376 |
| C | -0.08370 | -2.40967 | 0.55296  |
| C | -0.22431 | -3.79683 | 0.55761  |
| H | -1.33189 | -5.48533 | -0.20466 |
| H | -2.84185 | -4.07689 | -1.59466 |
| H | -2.57538 | -1.61686 | -1.61460 |
| H | 0.68309  | -1.94194 | 1.16377  |
| H | 0.44078  | -4.40258 | 1.16685  |
| C | 1.02317  | 3.18723  | -0.49894 |
| C | 2.10787  | 3.04770  | -1.57906 |
| H | 1.67723  | 2.72019  | -2.53053 |

|   |         |          |          |
|---|---------|----------|----------|
| H | 2.60089 | 4.01275  | -1.73703 |
| H | 2.87631 | 2.32687  | -1.28501 |
| C | 1.77980 | -0.07515 | -0.59718 |
| O | 1.97107 | -0.85314 | -1.53136 |
| N | 2.74040 | 0.25358  | 0.33125  |
| H | 2.41580 | 0.82683  | 1.09857  |
| H | 0.33308 | 3.97308  | -0.83454 |
| C | 1.62228 | 3.66092  | 0.83964  |
| H | 2.39019 | 2.96842  | 1.20010  |
| H | 2.09685 | 4.64035  | 0.71488  |
| H | 0.85116 | 3.74781  | 1.61169  |
| C | 6.83726 | -0.70152 | 0.58347  |
| C | 6.08492 | -1.18019 | -0.48987 |
| C | 4.72485 | -0.89018 | -0.60632 |
| C | 4.10295 | -0.10022 | 0.37266  |
| C | 4.85734 | 0.38259  | 1.45432  |
| C | 6.21244 | 0.08256  | 1.55651  |
| H | 7.89442 | -0.93585 | 0.66265  |
| H | 6.55743 | -1.79225 | -1.25316 |
| H | 4.14149 | -1.26638 | -1.43352 |
| H | 4.37680 | 0.99319  | 2.21473  |
| H | 6.77993 | 0.46460  | 2.40013  |

4r\_conformer-011

|   |          |          |          |
|---|----------|----------|----------|
| C | 1.84521  | 0.81424  | 0.00033  |
| C | 0.58112  | 0.25256  | -0.11258 |
| C | -0.37286 | 1.33936  | -0.11582 |
| C | 0.34871  | 2.53360  | -0.00794 |
| N | 1.66612  | 2.18385  | 0.07528  |
| H | 2.42206  | 2.85485  | 0.10127  |
| C | 5.72618  | -0.91758 | 0.07597  |
| C | 4.73414  | -1.52024 | -0.68920 |
| C | 3.46637  | -0.94667 | -0.71551 |
| C | 3.18007  | 0.21314  | 0.02766  |
| C | 4.21033  | 0.78932  | 0.79233  |
| C | 5.48770  | 0.23324  | 0.81600  |
| F | 6.96206  | -1.46874 | 0.09930  |
| H | 4.96178  | -2.41294 | -1.26178 |
| H | 2.69181  | -1.39551 | -1.32616 |
| H | 4.00972  | 1.66942  | 1.39603  |
| H | 6.28458  | 0.67189  | 1.40667  |
| C | -0.36867 | -3.92801 | -0.31483 |
| C | 0.33654  | -3.42072 | 0.77829  |
| C | 0.65608  | -2.06346 | 0.83807  |
| C | 0.28040  | -1.19311 | -0.19777 |

|   |          |          |          |
|---|----------|----------|----------|
| C | -0.42402 | -1.71694 | -1.29522 |
| C | -0.74811 | -3.07104 | -1.35179 |
| H | -0.62333 | -4.98281 | -0.35830 |
| H | 0.63233  | -4.07941 | 1.58969  |
| H | 1.19377  | -1.66537 | 1.69314  |
| H | -0.72315 | -1.05022 | -2.09851 |
| H | -1.29742 | -3.45808 | -2.20502 |
| C | -0.03560 | 3.98972  | 0.04713  |
| C | -1.05113 | 4.28771  | 1.16304  |
| H | -1.23132 | 5.36686  | 1.22315  |
| H | -2.00305 | 3.79145  | 0.96134  |
| H | -0.67757 | 3.94807  | 2.13502  |
| C | -1.84712 | 1.23222  | -0.15981 |
| O | -2.57975 | 2.09648  | -0.65543 |
| N | -2.34439 | 0.08678  | 0.42033  |
| H | -1.65184 | -0.54999 | 0.79147  |
| H | 0.88618  | 4.53551  | 0.29166  |
| C | -0.52697 | 4.49917  | -1.32032 |
| H | -0.73739 | 5.57365  | -1.26816 |
| H | 0.23153  | 4.33626  | -2.09396 |
| H | -1.43854 | 3.97026  | -1.60610 |
| C | -6.15934 | -1.68769 | 0.24618  |
| C | -6.01780 | -0.33552 | -0.06938 |
| C | -4.77151 | 0.29093  | -0.02209 |
| C | -3.63925 | -0.45421 | 0.34051  |
| C | -3.77801 | -1.81651 | 0.65695  |
| C | -5.02921 | -2.42394 | 0.61206  |
| H | -7.13530 | -2.16211 | 0.20855  |
| H | -6.88882 | 0.24902  | -0.35285 |
| H | -4.66178 | 1.33788  | -0.26402 |
| H | -2.89785 | -2.39561 | 0.92539  |
| H | -5.11852 | -3.47816 | 0.85842  |

#### 4r\_conformer-012

|   |          |          |          |
|---|----------|----------|----------|
| C | -1.84523 | 0.81428  | 0.00025  |
| C | -0.58115 | 0.25258  | -0.11257 |
| C | 0.37287  | 1.33935  | -0.11575 |
| C | -0.34870 | 2.53361  | -0.00788 |
| N | -1.66612 | 2.18388  | 0.07525  |
| H | -2.42205 | 2.85490  | 0.10118  |
| C | -5.72614 | -0.91766 | 0.07581  |
| C | -5.48783 | 0.23341  | 0.81550  |
| C | -4.21049 | 0.78954  | 0.79186  |
| C | -3.18007 | 0.21315  | 0.02755  |
| C | -3.46620 | -0.94690 | -0.71532 |

|   |          |          |          |
|---|----------|----------|----------|
| C | -4.73396 | -1.52052 | -0.68903 |
| F | -6.96200 | -1.46887 | 0.09912  |
| H | -6.28482 | 0.67221  | 1.40591  |
| H | -4.01002 | 1.66986  | 1.39530  |
| H | -2.69154 | -1.39588 | -1.32573 |
| H | -4.96147 | -2.41339 | -1.26137 |
| C | 0.36862  | -3.92801 | -0.31430 |
| C | -0.33618 | -3.42052 | 0.77899  |
| C | -0.65575 | -2.06325 | 0.83861  |
| C | -0.28049 | -1.19312 | -0.19756 |
| C | 0.42346  | -1.71717 | -1.29521 |
| C | 0.74759  | -3.07127 | -1.35160 |
| H | 0.62329  | -4.98282 | -0.35764 |
| H | -0.63163 | -4.07904 | 1.59065  |
| H | -1.19312 | -1.66498 | 1.69381  |
| H | 0.72224  | -1.05060 | -2.09876 |
| H | 1.29656  | -3.45848 | -2.20498 |
| C | 0.03556  | 3.98974  | 0.04723  |
| C | 0.52691  | 4.49925  | -1.32021 |
| H | 0.73725  | 5.57374  | -1.26803 |
| H | 1.43852  | 3.97041  | -1.60600 |
| H | -0.23157 | 4.33629  | -2.09386 |
| C | 1.84713  | 1.23223  | -0.15967 |
| O | 2.57977  | 2.09667  | -0.65499 |
| N | 2.34442  | 0.08665  | 0.42016  |
| H | 1.65187  | -0.55031 | 0.79100  |
| H | -0.88626 | 4.53547  | 0.29175  |
| C | 1.05105  | 4.28777  | 1.16316  |
| H | 1.23117  | 5.36693  | 1.22328  |
| H | 0.67748  | 3.94810  | 2.13512  |
| H | 2.00300  | 3.79156  | 0.96147  |
| C | 6.15946  | -1.68762 | 0.24578  |
| C | 6.01785  | -0.33542 | -0.06963 |
| C | 4.77154  | 0.29097  | -0.02224 |
| C | 3.63932  | -0.45426 | 0.34028  |
| C | 3.77814  | -1.81659 | 0.65656  |
| C | 5.02937  | -2.42396 | 0.61158  |
| H | 7.13544  | -2.16200 | 0.20807  |
| H | 6.88885  | 0.24919  | -0.35304 |
| H | 4.66177  | 1.33794  | -0.26403 |
| H | 2.89801  | -2.39576 | 0.92494  |
| H | 5.11873  | -3.47821 | 0.85783  |



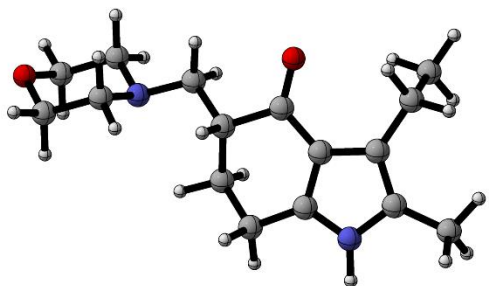

Note: This enantiomer was not used in the univariate correlation, but was verified to behave the same as the (S)-enantiomer  
 4s\_Renantiomer\_conformer-001

|   |          |          |          |
|---|----------|----------|----------|
| C | 3.38947  | 0.30571  | 0.28133  |
| N | 3.21777  | -1.87445 | -0.20853 |
| H | 3.48534  | -2.82583 | -0.42266 |
| C | 1.94061  | -1.41978 | -0.15836 |
| C | 1.99608  | -0.05976 | 0.14538  |
| C | -0.43625 | -1.25115 | -0.75118 |
| C | 0.69824  | -2.21568 | -0.37486 |
| H | -0.26167 | -0.86607 | -1.76487 |
| H | -1.39579 | -1.77428 | -0.76926 |
| H | 0.84339  | -2.97255 | -1.15484 |
| H | 0.43147  | -2.75979 | 0.54398  |
| C | 0.79123  | 0.72661  | 0.31299  |
| O | 0.79027  | 1.93914  | 0.55315  |
| C | -0.52990 | -0.06082 | 0.21965  |
| C | -1.68770 | 0.88151  | -0.13042 |
| H | -1.71102 | 1.71231  | 0.59447  |
| H | -1.48637 | 1.32715  | -1.11229 |
| C | -5.30921 | 0.31549  | -0.96043 |
| C | -3.98603 | 1.06180  | -0.84092 |
| N | -2.98045 | 0.20229  | -0.21490 |
| C | -3.46632 | -0.24502 | 1.09138  |
| C | -4.80452 | -0.95806 | 0.93396  |
| O | -5.77423 | -0.11857 | 0.31470  |
| H | -5.18236 | -0.55213 | -1.62754 |
| H | -6.08514 | 0.96703  | -1.37183 |
| H | -4.14659 | 1.99028  | -0.25872 |
| H | -3.63674 | 1.35064  | -1.83883 |
| H | -2.74651 | -0.94016 | 1.53475  |
| H | -3.58460 | 0.60723  | 1.78900  |
| H | -4.66353 | -1.87200 | 0.33489  |
| H | -5.20937 | -1.23623 | 1.91092  |
| C | 3.92535  | 1.67717  | 0.57481  |
| H | 3.35339  | 2.12028  | 1.39755  |
| H | 4.96548  | 1.60221  | 0.91382  |
| C | 3.84982  | 2.61787  | -0.63847 |

|   |          |          |          |
|---|----------|----------|----------|
| H | 4.42222  | 2.21432  | -1.48152 |
| H | 2.80927  | 2.73954  | -0.95347 |
| H | 4.25271  | 3.60774  | -0.39343 |
| C | 4.11987  | -0.84056 | 0.05440  |
| C | 5.59127  | -1.09480 | 0.04136  |
| H | 5.94431  | -1.39800 | -0.95285 |
| H | 6.13476  | -0.18985 | 0.32349  |
| H | 5.87377  | -1.88852 | 0.74457  |
| H | -0.68812 | -0.46598 | 1.23220  |

4s\_Renantiomer\_conformer-002

|   |          |          |          |
|---|----------|----------|----------|
| C | 3.39087  | 0.34382  | -0.19553 |
| N | 3.21763  | -1.87964 | 0.02439  |
| H | 3.48260  | -2.85365 | 0.08325  |
| C | 1.94105  | -1.42121 | 0.03177  |
| C | 1.99741  | -0.03371 | -0.09759 |
| C | -0.46757 | -1.43365 | -0.44235 |
| C | 0.69872  | -2.23661 | 0.15244  |
| H | -0.35594 | -1.38962 | -1.53410 |
| H | -1.41918 | -1.93110 | -0.23865 |
| H | 0.80783  | -3.20254 | -0.35471 |
| H | 0.49250  | -2.45942 | 1.21041  |
| C | 0.79406  | 0.77239  | -0.11713 |
| O | 0.79211  | 1.99978  | -0.26371 |
| C | -0.52254 | 0.00285  | 0.10640  |
| C | -1.70530 | 0.79431  | -0.46546 |
| H | -1.70507 | 1.80975  | -0.03513 |
| H | -1.55317 | 0.91112  | -1.54544 |
| C | -5.35333 | 0.00760  | -0.91168 |
| C | -4.03583 | 0.75227  | -1.08990 |
| N | -2.99315 | 0.12723  | -0.27527 |
| C | -3.41467 | 0.10747  | 1.12622  |
| C | -4.74927 | -0.61727 | 1.25873  |
| O | -5.75601 | -0.00953 | 0.45514  |
| H | -5.24482 | -1.02414 | -1.28263 |
| H | -6.15503 | 0.50073  | -1.46838 |
| H | -4.18255 | 1.81570  | -0.81704 |
| H | -3.73447 | 0.71714  | -2.14308 |
| H | -2.66726 | -0.41764 | 1.72926  |
| H | -3.51262 | 1.13399  | 1.53078  |
| H | -4.62276 | -1.67194 | 0.96593  |
| H | -5.10724 | -0.57878 | 2.29126  |
| C | 3.92890  | 1.74073  | -0.31207 |
| H | 4.96768  | 1.70836  | -0.66182 |
| H | 3.35467  | 2.28777  | -1.06762 |

|   |          |          |          |
|---|----------|----------|----------|
| C | 3.86075  | 2.51582  | 1.01361  |
| H | 2.82226  | 2.59732  | 1.34811  |
| H | 4.43621  | 2.00506  | 1.79408  |
| H | 4.26425  | 3.52870  | 0.89767  |
| C | 4.12038  | -0.82245 | -0.11334 |
| C | 5.59096  | -1.08003 | -0.14630 |
| H | 6.13540  | -0.14860 | -0.31934 |
| H | 5.95217  | -1.50570 | 0.79880  |
| H | 5.86347  | -1.78104 | -0.94558 |
| H | -0.62671 | -0.06045 | 1.20174  |

#### 4s\_Renantiomer\_conformer-003

|   |          |          |          |
|---|----------|----------|----------|
| C | -3.25658 | 0.21160  | -0.02771 |
| N | -2.68787 | -1.95246 | 0.09269  |
| H | -2.76710 | -2.95099 | 0.23084  |
| C | -1.57098 | -1.31653 | -0.34094 |
| C | -1.87639 | 0.04302  | -0.42736 |
| C | 0.52232  | -1.00039 | -1.59481 |
| C | -0.25817 | -1.94604 | -0.66595 |
| H | 1.55300  | -1.35054 | -1.69527 |
| H | 0.06241  | -1.02243 | -2.59010 |
| H | 0.31701  | -2.12571 | 0.25369  |
| H | -0.39674 | -2.92468 | -1.14032 |
| C | -0.88590 | 1.00973  | -0.85159 |
| O | -1.09902 | 2.22148  | -0.97094 |
| C | 0.52618  | 0.45187  | -1.08634 |
| C | 1.30208  | 0.61518  | 0.24062  |
| H | 1.32148  | 1.68918  | 0.50396  |
| H | 0.75162  | 0.10556  | 1.03968  |
| C | 4.58597  | -0.73410 | 1.46749  |
| C | 3.21761  | -0.06758 | 1.54359  |
| N | 2.64243  | 0.04047  | 0.20216  |
| C | 3.55388  | 0.78508  | -0.66761 |
| C | 4.91805  | 0.10506  | -0.69042 |
| O | 5.46833  | -0.00512 | 0.61884  |
| H | 4.47161  | -1.76387 | 1.09291  |
| H | 5.05592  | -0.76688 | 2.45431  |
| H | 3.32517  | 0.92519  | 2.02188  |
| H | 2.55003  | -0.67026 | 2.16988  |
| H | 3.15267  | 0.81046  | -1.68542 |
| H | 3.67044  | 1.83155  | -0.32466 |
| H | 4.81958  | -0.89578 | -1.14054 |
| H | 5.62951  | 0.68883  | -1.28086 |
| C | -3.99987 | 1.51238  | 0.06986  |
| H | -3.81977 | 2.10139  | -0.83613 |

|   |          |          |          |
|---|----------|----------|----------|
| H | -5.07826 | 1.31917  | 0.11545  |
| C | -3.57813 | 2.34653  | 1.29037  |
| H | -2.51356 | 2.59091  | 1.22843  |
| H | -4.14320 | 3.28490  | 1.33864  |
| H | -3.75292 | 1.79316  | 2.22009  |
| C | -3.72965 | -1.04267 | 0.29079  |
| C | -5.06427 | -1.51004 | 0.77072  |
| H | -5.49148 | -2.27198 | 0.10630  |
| H | -5.00630 | -1.94794 | 1.77557  |
| H | -5.76593 | -0.67356 | 0.81385  |
| H | 0.98144  | 1.09862  | -1.84354 |

4s\_Renantiomer\_conformer-004

|   |          |          |          |
|---|----------|----------|----------|
| C | 3.19111  | 0.07485  | -0.39632 |
| N | 2.59700  | -1.96683 | 0.31058  |
| H | 2.65421  | -2.95251 | 0.52879  |
| C | 1.52034  | -1.17962 | 0.55737  |
| C | 1.84400  | 0.10971  | 0.13063  |
| C | -0.48854 | -0.36335 | 1.71848  |
| C | 0.22518  | -1.60694 | 1.16191  |
| H | -1.51297 | -0.62109 | 1.99963  |
| H | 0.03376  | -0.03070 | 2.62352  |
| H | -0.40709 | -2.09456 | 0.40612  |
| H | 0.38535  | -2.34686 | 1.95498  |
| C | 0.88386  | 1.19035  | 0.21037  |
| O | 1.10879  | 2.35226  | -0.14654 |
| C | -0.51523 | 0.79856  | 0.71006  |
| C | -1.37333 | 0.48413  | -0.53652 |
| H | -1.40519 | 1.38620  | -1.17558 |
| H | -0.87780 | -0.29867 | -1.12209 |
| C | -4.73527 | -1.13103 | -0.98375 |
| C | -3.37255 | -0.57662 | -1.38135 |
| N | -2.71099 | 0.00120  | -0.21080 |
| C | -3.56109 | 1.03825  | 0.37528  |
| C | -4.92339 | 0.45205  | 0.72796  |
| O | -5.55804 | -0.11729 | -0.41313 |
| H | -4.60005 | -1.95348 | -0.26321 |
| H | -5.26864 | -1.51176 | -1.85913 |
| H | -3.50782 | 0.17327  | -2.18467 |
| H | -2.74930 | -1.38529 | -1.77979 |
| H | -3.09451 | 1.42513  | 1.28640  |
| H | -3.69574 | 1.88807  | -0.32187 |
| H | -4.79950 | -0.31501 | 1.50915  |
| H | -5.59285 | 1.23144  | 1.10211  |
| C | 3.96350  | 1.24294  | -0.93733 |

|   |          |          |          |
|---|----------|----------|----------|
| H | 4.82046  | 0.88187  | -1.51831 |
| H | 3.32747  | 1.80901  | -1.62690 |
| C | 4.45707  | 2.19180  | 0.16656  |
| H | 3.60533  | 2.59709  | 0.72066  |
| H | 5.10950  | 1.66424  | 0.87167  |
| H | 5.02016  | 3.03055  | -0.25957 |
| C | 3.62985  | -1.22495 | -0.26822 |
| C | 4.92770  | -1.87552 | -0.61787 |
| H | 4.78843  | -2.71848 | -1.30667 |
| H | 5.59418  | -1.15664 | -1.10045 |
| H | 5.44275  | -2.26161 | 0.27129  |
| H | -0.91761 | 1.69174  | 1.19923  |

4s\_Renantiomer\_conformer-005

|   |          |          |          |
|---|----------|----------|----------|
| C | 2.76812  | 0.58599  | 0.26594  |
| N | 3.14459  | -1.22172 | -1.00440 |
| H | 3.60093  | -1.85498 | -1.64722 |
| C | 1.94059  | -1.44223 | -0.42085 |
| C | 1.66097  | -0.33818 | 0.38419  |
| C | -0.37098 | -2.24152 | -0.27153 |
| C | 1.07987  | -2.65025 | -0.56695 |
| H | -0.74198 | -1.61968 | -1.09187 |
| H | -1.01197 | -3.12949 | -0.23629 |
| H | 1.16523  | -3.07868 | -1.57242 |
| H | 1.40230  | -3.43265 | 0.13658  |
| C | 0.47100  | -0.28640 | 1.20573  |
| O | 0.24805  | 0.60525  | 2.03233  |
| C | -0.51296 | -1.46786 | 1.05204  |
| C | -1.96701 | -1.05029 | 1.32707  |
| H | -2.53696 | -1.94747 | 1.59365  |
| H | -1.97688 | -0.37928 | 2.20229  |
| C | -2.82245 | 1.36457  | -1.45496 |
| C | -2.06765 | 0.82985  | -0.24344 |
| N | -2.64366 | -0.44903 | 0.17666  |
| C | -4.07218 | -0.28214 | 0.44542  |
| C | -4.77712 | 0.27500  | -0.78497 |
| O | -4.21208 | 1.52065  | -1.18331 |
| H | -2.68350 | 0.67701  | -2.30494 |
| H | -2.44522 | 2.35187  | -1.73579 |
| H | -2.09445 | 1.57626  | 0.57186  |
| H | -1.01981 | 0.68795  | -0.52401 |
| H | -4.50296 | -1.25655 | 0.70344  |
| H | -4.24740 | 0.39916  | 1.30099  |
| H | -4.70317 | -0.45048 | -1.61098 |
| H | -5.83350 | 0.46274  | -0.57337 |

|   |          |          |          |
|---|----------|----------|----------|
| C | 2.87110  | 1.93295  | 0.92062  |
| H | 2.64222  | 1.83614  | 1.98757  |
| H | 3.90078  | 2.30220  | 0.84648  |
| C | 1.91229  | 2.96469  | 0.30423  |
| H | 0.87610  | 2.63175  | 0.41719  |
| H | 2.01402  | 3.93882  | 0.79693  |
| H | 2.11717  | 3.09802  | -0.76411 |
| C | 3.66683  | 0.01224  | -0.60671 |
| C | 4.97691  | 0.48850  | -1.14210 |
| H | 4.94346  | 0.63738  | -2.22916 |
| H | 5.24907  | 1.44298  | -0.68522 |
| H | 5.78476  | -0.22477 | -0.93467 |
| H | -0.23651 | -2.14984 | 1.87264  |

4s\_Renantiomer\_conformer-006

|   |          |          |          |
|---|----------|----------|----------|
| C | 2.71185  | -0.58547 | 0.27246  |
| N | 2.98791  | 1.57959  | 0.78146  |
| H | 3.39151  | 2.42292  | 1.16665  |
| C | 1.81993  | 1.52231  | 0.09503  |
| C | 1.60560  | 0.18771  | -0.24949 |
| C | -0.49337 | 2.12473  | -0.44580 |
| C | 0.93187  | 2.66571  | -0.25848 |
| H | -0.90038 | 1.84179  | 0.52968  |
| H | -1.14505 | 2.91144  | -0.84182 |
| H | 0.95495  | 3.43984  | 0.51743  |
| H | 1.27893  | 3.14147  | -1.18816 |
| C | 0.45291  | -0.21502 | -1.02642 |
| O | 0.27508  | -1.36546 | -1.44236 |
| C | -0.54545 | 0.90817  | -1.38794 |
| C | -1.97680 | 0.38183  | -1.58089 |
| H | -2.52142 | 1.09559  | -2.20915 |
| H | -1.92624 | -0.57258 | -2.13118 |
| C | -3.04978 | -0.81347 | 1.84239  |
| C | -2.20800 | -0.76575 | 0.57248  |
| N | -2.73902 | 0.25040  | -0.33802 |
| C | -4.14725 | -0.02859 | -0.62054 |
| C | -4.94162 | -0.08991 | 0.67820  |
| O | -4.41909 | -1.08271 | 1.55617  |
| H | -2.96186 | 0.14674  | 2.37605  |
| H | -2.70434 | -1.61491 | 2.50139  |
| H | -2.18906 | -1.76528 | 0.10047  |
| H | -1.17963 | -0.51277 | 0.84683  |
| H | -4.54838 | 0.76881  | -1.25684 |
| H | -4.27051 | -0.98564 | -1.16440 |
| H | -4.91718 | 0.89537  | 1.17084  |

|   |          |          |          |
|---|----------|----------|----------|
| H | -5.98285 | -0.36077 | 0.48210  |
| C | 2.91604  | -2.06516 | 0.11983  |
| H | 3.61679  | -2.42196 | 0.88425  |
| H | 1.96522  | -2.58070 | 0.29388  |
| C | 3.43840  | -2.45312 | -1.27270 |
| H | 2.72057  | -2.14744 | -2.03946 |
| H | 4.39706  | -1.96403 | -1.48008 |
| H | 3.58330  | -3.53728 | -1.34965 |
| C | 3.54942  | 0.30628  | 0.90653  |
| C | 4.83856  | 0.11301  | 1.63488  |
| H | 5.66868  | 0.63356  | 1.14009  |
| H | 4.78487  | 0.48854  | 2.66475  |
| H | 5.09311  | -0.94869 | 1.67904  |
| H | -0.21210 | 1.24182  | -2.38445 |

4s\_Renantiomer\_conformer-007

|   |          |          |          |
|---|----------|----------|----------|
| C | -3.04906 | 0.65753  | 0.26383  |
| N | -3.62503 | -1.34408 | -0.56341 |
| H | -4.19821 | -2.09994 | -0.91355 |
| C | -2.28679 | -1.41715 | -0.35390 |
| C | -1.87854 | -0.18639 | 0.15803  |
| C | -0.13419 | -2.44580 | 0.23649  |
| C | -1.40374 | -2.58877 | -0.61704 |
| H | -0.38110 | -2.63905 | 1.28873  |
| H | 0.60070  | -3.19920 | -0.06637 |
| H | -1.91769 | -3.53161 | -0.39599 |
| H | -1.12814 | -2.62336 | -1.68199 |
| C | -0.49335 | 0.07251  | 0.49265  |
| O | -0.10261 | 1.12583  | 1.00735  |
| C | 0.50132  | -1.04465 | 0.11761  |
| C | 1.82862  | -0.95142 | 0.89415  |
| H | 1.68926  | -0.33815 | 1.80015  |
| H | 2.11482  | -1.95588 | 1.22517  |
| C | 5.35544  | -0.21778 | -0.18925 |
| C | 4.22552  | -0.67520 | 0.72664  |
| N | 2.93554  | -0.45072 | 0.07403  |
| C | 2.80611  | 0.97030  | -0.25844 |
| C | 3.96055  | 1.39156  | -1.15903 |
| O | 5.22054  | 1.15786  | -0.53379 |
| H | 5.35692  | -0.83403 | -1.10268 |
| H | 6.32371  | -0.32250 | 0.30841  |
| H | 4.29755  | -0.13158 | 1.68916  |
| H | 4.33894  | -1.74478 | 0.93895  |
| H | 1.85692  | 1.14382  | -0.77207 |
| H | 2.80408  | 1.59799  | 0.65174  |

|   |          |          |          |
|---|----------|----------|----------|
| H | 3.90688  | 0.83776  | -2.11020 |
| H | 3.91312  | 2.46327  | -1.37199 |
| C | -3.07786 | 2.08326  | 0.73357  |
| H | -4.10851 | 2.37314  | 0.97026  |
| H | -2.50074 | 2.17031  | 1.66058  |
| C | -2.49661 | 3.06119  | -0.30027 |
| H | -3.05449 | 3.01044  | -1.24227 |
| H | -2.53916 | 4.09299  | 0.06814  |
| H | -1.45059 | 2.81395  | -0.50441 |
| C | -4.11332 | -0.08803 | -0.19505 |
| C | -5.56453 | 0.23353  | -0.33827 |
| H | -5.77144 | 1.23392  | 0.04937  |
| H | -5.88615 | 0.21030  | -1.38750 |
| H | -6.19482 | -0.47628 | 0.21249  |
| H | 0.73381  | -0.88552 | -0.94732 |

4s\_Renantiomer\_conformer-008

|   |          |          |          |
|---|----------|----------|----------|
| C | 3.02644  | -0.69252 | -0.22957 |
| N | 3.56074  | 1.46497  | -0.51583 |
| H | 4.11351  | 2.29350  | -0.69032 |
| C | 2.23635  | 1.46219  | -0.22266 |
| C | 1.85492  | 0.13435  | -0.03509 |
| C | 0.10952  | 2.26549  | 0.70815  |
| C | 1.33877  | 2.64862  | -0.12975 |
| H | 0.40357  | 2.17402  | 1.76204  |
| H | -0.64010 | 3.06184  | 0.64996  |
| H | 1.85877  | 3.50742  | 0.31083  |
| H | 1.01597  | 2.95889  | -1.13516 |
| C | 0.48320  | -0.22523 | 0.25977  |
| O | 0.11298  | -1.38561 | 0.46908  |
| C | -0.52841 | 0.93859  | 0.24664  |
| C | -1.81571 | 0.62155  | 1.03243  |
| H | -1.63829 | -0.22670 | 1.71455  |
| H | -2.07217 | 1.48701  | 1.65334  |
| C | -5.40100 | 0.22756  | -0.03700 |
| C | -4.22267 | 0.40748  | 0.91382  |
| N | -2.96845 | 0.37508  | 0.16137  |
| C | -2.87559 | -0.89475 | -0.56325 |
| C | -4.07692 | -1.04424 | -1.48831 |
| O | -5.30246 | -0.99534 | -0.76107 |
| H | -5.43660 | 1.07629  | -0.73882 |
| H | -6.34312 | 0.18833  | 0.51710  |
| H | -4.25723 | -0.38552 | 1.68654  |
| H | -4.31025 | 1.37392  | 1.42396  |
| H | -1.95351 | -0.91756 | -1.15005 |



|   |          |          |          |
|---|----------|----------|----------|
| H | -2.84085 | -1.75323 | 0.13284  |
| H | -4.05994 | -0.24466 | -2.24636 |
| H | -4.05535 | -2.01245 | -1.99653 |
| C | 3.09460  | -2.18627 | -0.09489 |
| H | 2.24178  | -2.63551 | -0.61562 |
| H | 4.00099  | -2.56006 | -0.58596 |
| C | 3.07731  | -2.65252 | 1.36968  |
| H | 3.92585  | -2.23371 | 1.92265  |
| H | 2.15302  | -2.32618 | 1.85532  |
| H | 3.13218  | -3.74568 | 1.43445  |
| C | 4.06603  | 0.16261  | -0.52443 |
| C | 5.51002  | -0.08953 | -0.80952 |
| H | 6.16058  | 0.35840  | -0.04721 |
| H | 5.71113  | -1.16338 | -0.82660 |
| H | 5.81159  | 0.32381  | -1.78037 |
| H | -0.81298 | 1.06822  | -0.80948 |

4s\_Renantiomer\_conformer-009

|   |          |          |          |
|---|----------|----------|----------|
| C | -3.03681 | 0.60049  | 0.14866  |
| N | -3.40928 | -1.47846 | -0.60031 |
| H | -3.89970 | -2.28908 | -0.95337 |
| C | -2.09402 | -1.44970 | -0.26966 |
| C | -1.81126 | -0.16724 | 0.19892  |
| C | 0.04877  | -2.30178 | 0.57596  |
| C | -1.11998 | -2.57257 | -0.38355 |
| H | -0.28937 | -2.45370 | 1.60959  |
| H | 0.85348  | -3.02208 | 0.39257  |
| H | -1.59507 | -3.53490 | -0.15936 |
| H | -0.74096 | -2.64195 | -1.41459 |
| C | -0.47879 | 0.20315  | 0.63018  |
| O | -0.19466 | 1.31581  | 1.08778  |
| C | 0.60763  | -0.87230 | 0.43616  |
| C | 1.83577  | -0.63340 | 1.35517  |
| H | 1.55613  | 0.07446  | 2.14049  |
| H | 2.10441  | -1.57950 | 1.84054  |
| C | 4.25419  | 1.69459  | -0.36680 |
| C | 2.89680  | 1.20059  | 0.11987  |
| N | 3.04913  | -0.12445 | 0.71821  |
| C | 3.64112  | -1.05327 | -0.24046 |
| C | 4.98111  | -0.50376 | -0.71987 |
| O | 4.82907  | 0.78666  | -1.30511 |
| H | 4.93154  | 1.81972  | 0.49310  |
| H | 4.15636  | 2.65408  | -0.88263 |
| H | 2.19397  | 1.19571  | -0.73418 |
| H | 2.49034  | 1.88565  | 0.86935  |

|   |          |          |          |
|---|----------|----------|----------|
| H | 3.79338  | -2.02309 | 0.24824  |
| H | 2.99468  | -1.22122 | -1.12319 |
| H | 5.67989  | -0.44877 | 0.13014  |
| H | 5.41187  | -1.14828 | -1.49137 |
| C | -3.19873 | 2.04487  | 0.52526  |
| H | -4.26197 | 2.27227  | 0.66754  |
| H | -2.70253 | 2.22624  | 1.48482  |
| C | -2.60784 | 3.00202  | -0.52245 |
| H | -1.53543 | 2.81828  | -0.63682 |
| H | -3.08908 | 2.85919  | -1.49668 |
| H | -2.74645 | 4.04727  | -0.22171 |
| C | -4.00636 | -0.23978 | -0.35452 |
| C | -5.45543 | -0.02556 | -0.64510 |
| H | -5.67532 | -0.12037 | -1.71638 |
| H | -6.08789 | -0.75005 | -0.11636 |
| H | -5.76125 | 0.97557  | -0.33179 |
| H | 0.92753  | -0.75291 | -0.61131 |

4s\_Renantiomer\_conformer-010

|   |          |          |          |
|---|----------|----------|----------|
| C | -2.99298 | 0.58732  | -0.33820 |
| N | -3.32808 | -1.62126 | -0.51706 |
| H | -3.79671 | -2.50310 | -0.67553 |
| C | -2.03511 | -1.48778 | -0.12921 |
| C | -1.77754 | -0.12326 | -0.00383 |
| C | 0.06708  | -2.05110 | 1.00825  |
| C | -1.05488 | -2.58612 | 0.10581  |
| H | -0.31943 | -1.92336 | 2.02810  |
| H | 0.88016  | -2.78319 | 1.06287  |
| H | -1.53822 | -3.45980 | 0.55892  |
| H | -0.62838 | -2.92415 | -0.85091 |
| C | -0.46414 | 0.36809  | 0.35935  |
| O | -0.19988 | 1.56752  | 0.49976  |
| C | 0.63116  | -0.70452 | 0.51427  |
| C | 1.81028  | -0.20921 | 1.39504  |
| H | 1.49225  | 0.68389  | 1.94028  |
| H | 2.04870  | -0.98295 | 2.13489  |
| C | 4.32948  | 1.58446  | -0.76562 |
| C | 2.94515  | 1.22885  | -0.23600 |
| N | 3.05810  | 0.11849  | 0.70796  |
| C | 3.69561  | -1.03072 | 0.07135  |
| C | 5.06244  | -0.62016 | -0.46767 |
| O | 4.94918  | 0.46092  | -1.38918 |
| H | 4.96008  | 1.94518  | 0.06270  |
| H | 4.26496  | 2.36636  | -1.52769 |
| H | 2.28946  | 0.98476  | -1.09268 |

|   |          |          |          |
|---|----------|----------|----------|
| H | 2.50259  | 2.08846  | 0.27542  |
| H | 3.81589  | -1.82942 | 0.81307  |
| H | 3.09640  | -1.43840 | -0.76534 |
| H | 5.71507  | -0.32971 | 0.37111  |
| H | 5.53022  | -1.44624 | -1.01077 |
| C | -3.19155 | 2.07529  | -0.30921 |
| H | -2.33733 | 2.56340  | -0.79096 |
| H | -4.08145 | 2.34022  | -0.89260 |
| C | -3.33285 | 2.62918  | 1.11769  |
| H | -2.42848 | 2.41464  | 1.69473  |
| H | -3.48172 | 3.71540  | 1.10423  |
| H | -4.18699 | 2.17280  | 1.63085  |
| C | -3.93436 | -0.36973 | -0.64965 |
| C | -5.36747 | -0.25984 | -1.05488 |
| H | -5.65179 | 0.78977  | -1.16160 |
| H | -5.55888 | -0.75843 | -2.01363 |
| H | -6.03744 | -0.71177 | -0.31196 |
| H | 1.00461  | -0.86695 | -0.50937 |

4s\_Renantiomer\_conformer-011

|   |          |          |          |
|---|----------|----------|----------|
| C | 2.77513  | 0.77968  | 0.12281  |
| N | 3.30602  | -1.21106 | -0.75844 |
| H | 3.83562  | -1.93166 | -1.23028 |
| C | 2.10921  | -1.40080 | -0.14876 |
| C | 1.73335  | -0.18065 | 0.41386  |
| C | 0.32786  | -2.56513 | 1.08584  |
| C | 1.34174  | -2.67772 | -0.06824 |
| H | -0.37154 | -3.40763 | 1.05321  |
| H | 0.86887  | -2.62929 | 2.03739  |
| H | 0.81923  | -2.86690 | -1.01664 |
| H | 2.01048  | -3.53184 | 0.09092  |
| C | 0.49517  | -0.04113 | 1.15162  |
| O | 0.19657  | 0.96562  | 1.80479  |
| C | -0.46420 | -1.23917 | 1.04738  |
| C | -1.34706 | -1.16646 | -0.22818 |
| H | -0.78717 | -0.67897 | -1.04926 |
| H | -1.55094 | -2.19141 | -0.55823 |
| C | -4.90934 | -0.17983 | -0.88746 |
| C | -3.53972 | -0.79508 | -1.15025 |
| N | -2.64780 | -0.53348 | -0.01843 |
| C | -2.55462 | 0.91215  | 0.20340  |
| C | -3.94445 | 1.49280  | 0.42917  |
| O | -4.81344 | 1.22412  | -0.66867 |
| H | -5.36662 | -0.66551 | -0.01043 |
| H | -5.56678 | -0.31924 | -1.75025 |

|   |          |          |          |
|---|----------|----------|----------|
| H | -3.13325 | -0.38001 | -2.09335 |
| H | -3.64567 | -1.87835 | -1.28104 |
| H | -1.92902 | 1.10621  | 1.07698  |
| H | -2.08465 | 1.41821  | -0.66413 |
| H | -4.37186 | 1.07229  | 1.35376  |
| H | -3.89447 | 2.58076  | 0.52840  |
| C | 2.76377  | 2.23490  | 0.49125  |
| H | 2.50825  | 2.33831  | 1.55136  |
| H | 3.76707  | 2.65744  | 0.36105  |
| C | 1.75570  | 3.04634  | -0.33913 |
| H | 0.74221  | 2.66414  | -0.18325 |
| H | 1.77033  | 4.10389  | -0.05049 |
| H | 1.98808  | 2.97943  | -1.40804 |
| C | 3.73129  | 0.11172  | -0.61067 |
| C | 5.01995  | 0.56541  | -1.21338 |
| H | 5.86619  | -0.04140 | -0.86703 |
| H | 5.00145  | 0.50547  | -2.30924 |
| H | 5.22099  | 1.60439  | -0.94142 |
| H | -1.13210 | -1.19670 | 1.91356  |

4s\_Renantiomer\_conformer-012

|   |          |          |          |
|---|----------|----------|----------|
| C | -3.29298 | 0.42721  | -0.37687 |
| N | -3.34102 | -1.79334 | -0.07901 |
| H | -3.69937 | -2.73549 | 0.00051  |
| C | -2.04586 | -1.43735 | 0.10852  |
| C | -1.96454 | -0.05654 | -0.06775 |
| C | 0.21364  | -1.50128 | 1.06104  |
| C | -0.90924 | -2.34359 | 0.43816  |
| H | -0.09231 | -1.17707 | 2.06410  |
| H | 1.11130  | -2.11434 | 1.18673  |
| H | -1.22357 | -3.14222 | 1.12037  |
| H | -0.53839 | -2.83666 | -0.47332 |
| C | -0.70178 | 0.64650  | 0.02517  |
| O | -0.59357 | 1.87118  | -0.09061 |
| C | 0.54395  | -0.25330 | 0.21751  |
| C | 1.74327  | 0.54504  | 0.75378  |
| H | 1.49277  | 1.60804  | 0.70808  |
| H | 1.91204  | 0.29135  | 1.81889  |
| C | 5.23827  | 1.13918  | -0.49337 |
| C | 3.99613  | 1.31164  | 0.37237  |
| N | 2.96363  | 0.35674  | -0.03317 |
| C | 3.49679  | -1.00318 | 0.05354  |
| C | 4.75428  | -1.12697 | -0.79986 |
| O | 5.74935  | -0.18813 | -0.40362 |
| H | 6.03812  | 1.80611  | -0.15979 |

|   |          |          |          |
|---|----------|----------|----------|
| H | 4.99214  | 1.37528  | -1.54096 |
| H | 3.60536  | 2.32903  | 0.25576  |
| H | 4.27742  | 1.17959  | 1.43571  |
| H | 3.73594  | -1.27744 | 1.10026  |
| H | 2.75093  | -1.71414 | -0.31514 |
| H | 5.19833  | -2.12006 | -0.68856 |
| H | 4.49354  | -0.97141 | -1.85899 |
| C | -3.68882 | 1.85599  | -0.61356 |
| H | -2.96154 | 2.32663  | -1.28412 |
| H | -4.65980 | 1.89022  | -1.12194 |
| C | -3.76324 | 2.67535  | 0.68487  |
| H | -2.78593 | 2.68945  | 1.17630  |
| H | -4.05909 | 3.71090  | 0.47923  |
| H | -4.49295 | 2.24206  | 1.37837  |
| C | -4.12200 | -0.67358 | -0.37472 |
| C | -5.59014 | -0.81278 | -0.60946 |
| H | -6.02424 | 0.15305  | -0.87894 |
| H | -5.80753 | -1.51702 | -1.42256 |
| H | -6.11358 | -1.17454 | 0.28503  |
| H | 0.79962  | -0.58356 | -0.80216 |

4s\_Renantiomer\_conformer-013

|   |          |          |          |
|---|----------|----------|----------|
| C | 3.32522  | 0.48975  | -0.09821 |
| N | 3.39132  | -1.73008 | 0.20225  |
| H | 3.76100  | -2.66114 | 0.34005  |
| C | 2.08028  | -1.43500 | 0.01810  |
| C | 1.98689  | -0.05622 | -0.16832 |
| C | -0.22323 | -1.75355 | -0.76255 |
| C | 0.94095  | -2.39622 | 0.00577  |
| H | 0.02840  | -1.71246 | -1.83019 |
| H | -1.11722 | -2.37804 | -0.67206 |
| H | 1.23081  | -3.35012 | -0.45026 |
| H | 0.62300  | -2.62332 | 1.03473  |
| C | 0.71196  | 0.59485  | -0.38722 |
| O | 0.59327  | 1.80519  | -0.60170 |
| C | -0.52950 | -0.32409 | -0.27185 |
| C | -1.76213 | 0.30025  | -0.94561 |
| H | -1.52330 | 1.33635  | -1.19879 |
| H | -1.97548 | -0.23047 | -1.89436 |
| C | -4.68012 | -0.89279 | 1.13715  |
| C | -3.46244 | -1.00278 | 0.22604  |
| N | -2.94355 | 0.33049  | -0.08118 |
| C | -4.00515 | 1.14013  | -0.68128 |
| C | -5.20626 | 1.20642  | 0.25421  |
| O | -5.70349 | -0.09643 | 0.54803  |

|   |          |          |          |
|---|----------|----------|----------|
| H | -4.37585 | -0.45714 | 2.10233  |
| H | -5.11564 | -1.87945 | 1.31768  |
| H | -3.74318 | -1.54940 | -0.69612 |
| H | -2.69221 | -1.58747 | 0.73850  |
| H | -3.62286 | 2.15158  | -0.86077 |
| H | -4.33068 | 0.72623  | -1.65593 |
| H | -4.91820 | 1.71612  | 1.18751  |
| H | -6.02831 | 1.75824  | -0.21006 |
| C | 3.70352  | 1.93875  | -0.20613 |
| H | 4.77741  | 2.02523  | -0.41016 |
| H | 3.17990  | 2.38762  | -1.05705 |
| C | 3.35913  | 2.73835  | 1.06079  |
| H | 2.28191  | 2.70056  | 1.24849  |
| H | 3.87668  | 2.32643  | 1.93464  |
| H | 3.65166  | 3.78953  | 0.95323  |
| C | 4.17088  | -0.57278 | 0.13592  |
| C | 5.65200  | -0.64438 | 0.31220  |
| H | 6.11353  | -1.33600 | -0.40409 |
| H | 6.10007  | 0.34068  | 0.16127  |
| H | 5.92756  | -0.98435 | 1.31887  |
| H | -0.73350 | -0.36624 | 0.81029  |

4s\_Renantiomer\_conformer-014

|   |          |          |          |
|---|----------|----------|----------|
| C | 2.74204  | 0.67371  | -0.36131 |
| N | 3.16008  | -1.50849 | -0.65407 |
| H | 3.63790  | -2.35777 | -0.92443 |
| C | 1.98384  | -1.45997 | 0.01962  |
| C | 1.67978  | -0.11379 | 0.22596  |
| C | 0.20592  | -2.13999 | 1.57537  |
| C | 1.16683  | -2.62283 | 0.47330  |
| H | -0.52504 | -2.92298 | 1.80488  |
| H | 0.78288  | -1.95662 | 2.48958  |
| H | 0.59998  | -3.04218 | -0.37003 |
| H | 1.80478  | -3.43175 | 0.84824  |
| C | 0.46437  | 0.28911  | 0.90199  |
| O | 0.21186  | 1.45758  | 1.21913  |
| C | -0.53755 | -0.84485 | 1.18196  |
| C | -1.48153 | -1.09685 | -0.02615 |
| H | -0.96580 | -0.84507 | -0.97270 |
| H | -1.70098 | -2.16959 | -0.07004 |
| C | -5.08011 | -0.27022 | -0.71317 |
| C | -3.72741 | -0.95095 | -0.88884 |
| N | -2.76982 | -0.41479 | 0.08037  |
| C | -2.66582 | 1.03677  | -0.09108 |
| C | -4.04015 | 1.67516  | 0.06153  |

|   |          |          |          |
|---|----------|----------|----------|
| O | -4.97541 | 1.14108  | -0.87287 |
| H | -5.48062 | -0.50560 | 0.28600  |
| H | -5.78929 | -0.62007 | -1.46866 |
| H | -3.38088 | -0.80132 | -1.93020 |
| H | -3.83820 | -2.02936 | -0.72584 |
| H | -1.98318 | 1.44337  | 0.65833  |
| H | -2.25548 | 1.29058  | -1.08913 |
| H | -4.40722 | 1.51563  | 1.08825  |
| H | -3.98812 | 2.75065  | -0.12985 |
| C | 2.84650  | 2.17140  | -0.35531 |
| H | 3.54645  | 2.49566  | -1.13465 |
| H | 1.87053  | 2.60221  | -0.60547 |
| C | 3.29771  | 2.73151  | 1.00309  |
| H | 2.57632  | 2.45649  | 1.77801  |
| H | 4.27870  | 2.33146  | 1.28382  |
| H | 3.36981  | 3.82517  | 0.97220  |
| C | 3.64215  | -0.22024 | -0.89912 |
| C | 4.93069  | -0.01699 | -1.62593 |
| H | 4.92119  | -0.49588 | -2.61329 |
| H | 5.11820  | 1.04933  | -1.77329 |
| H | 5.78218  | -0.43045 | -1.07009 |
| H | -1.16095 | -0.52403 | 2.02260  |

4s\_Renantiomer\_conformer-015

|   |          |          |          |
|---|----------|----------|----------|
| C | -3.25657 | 0.21163  | -0.02768 |
| N | -2.68791 | -1.95243 | 0.09283  |
| H | -2.76717 | -2.95095 | 0.23110  |
| C | -1.57101 | -1.31657 | -0.34087 |
| C | -1.87642 | 0.04298  | -0.42738 |
| C | 0.52220  | -1.00050 | -1.59490 |
| C | -0.25827 | -1.94615 | -0.66602 |
| H | 1.55286  | -1.35068 | -1.69548 |
| H | 0.06222  | -1.02249 | -2.59016 |
| H | 0.31698  | -2.12589 | 0.25356  |
| H | -0.39693 | -2.92475 | -1.14043 |
| C | -0.88590 | 1.00965  | -0.85161 |
| O | -1.09897 | 2.22141  | -0.97094 |
| C | 0.52615  | 0.45173  | -1.08639 |
| C | 1.30207  | 0.61498  | 0.24058  |
| H | 1.32151  | 1.68898  | 0.50394  |
| H | 0.75161  | 0.10536  | 1.03964  |
| C | 4.58609  | -0.73388 | 1.46759  |
| C | 3.21758  | -0.06767 | 1.54357  |
| N | 2.64242  | 0.04027  | 0.20212  |
| C | 3.55380  | 0.78486  | -0.66774 |

|   |          |          |          |
|---|----------|----------|----------|
| C | 4.91813  | 0.10519  | -0.69037 |
| O | 5.46835  | -0.00479 | 0.61893  |
| H | 4.47199  | -1.76371 | 1.09309  |
| H | 5.05598  | -0.76649 | 2.45444  |
| H | 3.32488  | 0.92512  | 2.02187  |
| H | 2.55010  | -0.67049 | 2.16985  |
| H | 3.15265  | 0.80997  | -1.68557 |
| H | 3.67010  | 1.83143  | -0.32501 |
| H | 4.81998  | -0.89570 | -1.14045 |
| H | 5.62948  | 0.68910  | -1.28079 |
| C | -3.99975 | 1.51249  | 0.06978  |
| H | -3.81943 | 2.10143  | -0.83621 |
| H | -5.07815 | 1.31934  | 0.11522  |
| C | -3.57813 | 2.34681  | 1.29023  |
| H | -3.75283 | 1.79356  | 2.22003  |
| H | -2.51360 | 2.59138  | 1.22824  |
| H | -4.14336 | 3.28509  | 1.33838  |
| C | -3.72964 | -1.04261 | 0.29092  |
| C | -5.06423 | -1.51001 | 0.77089  |
| H | -5.00605 | -1.94877 | 1.77535  |
| H | -5.76566 | -0.67339 | 0.81494  |
| H | -5.49186 | -2.27127 | 0.10596  |
| H | 0.98141  | 1.09849  | -1.84358 |

4s\_Renantiomer\_conformer-016

|   |          |          |          |
|---|----------|----------|----------|
| C | 2.27112  | -0.98734 | -0.37467 |
| N | 3.23480  | 0.57199  | 0.91306  |
| H | 3.90052  | 1.01843  | 1.52920  |
| C | 2.15717  | 1.18526  | 0.35737  |
| C | 1.52368  | 0.24613  | -0.45532 |
| C | 0.70646  | 3.00221  | -0.49972 |
| C | 1.73453  | 2.60015  | 0.57795  |
| H | 0.19481  | 3.92227  | -0.19560 |
| H | 1.23984  | 3.22625  | -1.43084 |
| H | 1.30047  | 2.70942  | 1.58165  |
| H | 2.59554  | 3.27862  | 0.54640  |
| C | 0.33967  | 0.58956  | -1.21619 |
| O | -0.12721 | -0.10116 | -2.12703 |
| C | -0.33390 | 1.89924  | -0.79123 |
| C | -1.22635 | 1.64307  | 0.44314  |
| H | -0.59088 | 1.54295  | 1.32878  |
| H | -1.86402 | 2.53450  | 0.60492  |
| C | -3.75874 | -0.88058 | -0.75616 |
| C | -3.01567 | 0.44916  | -0.70929 |
| N | -2.01299 | 0.41798  | 0.35623  |



|   |          |          |          |
|---|----------|----------|----------|
| C | -2.64834 | 0.09942  | 1.63377  |
| C | -3.38924 | -1.22790 | 1.52655  |
| O | -4.36972 | -1.18936 | 0.49399  |
| H | -3.05404 | -1.68030 | -1.03475 |
| H | -4.56293 | -0.84624 | -1.49643 |
| H | -3.74125 | 1.27155  | -0.55455 |
| H | -2.51400 | 0.60376  | -1.66712 |
| H | -1.87582 | 0.02625  | 2.40810  |
| H | -3.36204 | 0.88797  | 1.94313  |
| H | -2.66642 | -2.03534 | 1.32700  |
| H | -3.92067 | -1.45094 | 2.45598  |
| C | 1.88764  | -2.28322 | -1.02790 |
| H | 1.67502  | -2.10601 | -2.08762 |
| H | 2.72586  | -2.98854 | -0.98168 |
| C | 0.64647  | -2.91581 | -0.37477 |
| H | 0.83971  | -3.15019 | 0.67844  |
| H | -0.20052 | -2.22398 | -0.41902 |
| H | 0.36160  | -3.84332 | -0.88534 |
| C | 3.32128  | -0.75549 | 0.48707  |
| C | 4.41489  | -1.64323 | 0.98293  |
| H | 4.35415  | -1.79994 | 2.06768  |
| H | 4.35468  | -2.62269 | 0.50217  |
| H | 5.40679  | -1.22541 | 0.76828  |
| H | -0.95765 | 2.22171  | -1.63071 |

4s\_Renantiomer\_conformer-017

|   |          |          |          |
|---|----------|----------|----------|
| C | 2.71201  | -0.58543 | 0.27252  |
| N | 2.98806  | 1.57971  | 0.78116  |
| H | 3.39169  | 2.42310  | 1.16617  |
| C | 1.82003  | 1.52229  | 0.09484  |
| C | 1.60570  | 0.18764  | -0.24943 |
| C | -0.49332 | 2.12457  | -0.44597 |
| C | 0.93192  | 2.66561  | -0.25878 |
| H | -1.14503 | 2.91120  | -0.84209 |
| H | -0.90029 | 1.84178  | 0.52956  |
| H | 0.95501  | 3.43986  | 0.51701  |
| H | 1.27892  | 3.14125  | -1.18856 |
| C | 0.45293  | -0.21528 | -1.02616 |
| O | 0.27504  | -1.36583 | -1.44175 |
| C | -0.54539 | 0.90787  | -1.38792 |
| C | -1.97674 | 0.38154  | -1.58090 |
| H | -2.52127 | 1.09520  | -2.20935 |
| H | -1.92617 | -0.57297 | -2.13100 |
| C | -3.05009 | -0.81305 | 1.84251  |
| C | -2.20818 | -0.76557 | 0.57269  |

|   |          |          |          |
|---|----------|----------|----------|
| N | -2.73908 | 0.25040  | -0.33808 |
| C | -4.14728 | -0.02865 | -0.62070 |
| C | -4.94180 | -0.08972 | 0.67796  |
| O | -4.41937 | -1.08235 | 1.55618  |
| H | -2.96225 | 0.14726  | 2.37599  |
| H | -2.70473 | -1.61436 | 2.50170  |
| H | -2.18916 | -1.76519 | 0.10088  |
| H | -1.17984 | -0.51254 | 0.84711  |
| H | -4.54835 | 0.76863  | -1.25720 |
| H | -4.27049 | -0.98580 | -1.16439 |
| H | -4.91742 | 0.89565  | 1.17042  |
| H | -5.98301 | -0.36061 | 0.48179  |
| C | 2.91622  | -2.06514 | 0.12012  |
| H | 3.61721  | -2.42176 | 0.88441  |
| H | 1.96548  | -2.58071 | 0.29452  |
| C | 3.43821  | -2.45333 | -1.27249 |
| H | 4.39677  | -1.96420 | -1.48024 |
| H | 3.58319  | -3.53749 | -1.34926 |
| H | 2.72012  | -2.14788 | -2.03910 |
| C | 3.54962  | 0.30643  | 0.90637  |
| C | 4.83882  | 0.11331  | 1.63467  |
| H | 5.09341  | -0.94838 | 1.67901  |
| H | 5.66889  | 0.63379  | 1.13975  |
| H | 4.78517  | 0.48901  | 2.66448  |
| H | -0.21196 | 1.24136  | -2.38445 |

4s\_Renantiomer\_conformer-018

|   |          |          |          |
|---|----------|----------|----------|
| C | 2.40351  | 0.85178  | 0.38950  |
| N | 3.29009  | -0.84213 | -0.77886 |
| H | 3.95461  | -1.37994 | -1.31885 |
| C | 2.10100  | -1.31003 | -0.32231 |
| C | 1.50394  | -0.28086 | 0.40759  |
| C | 0.46318  | -2.94259 | 0.52971  |
| C | 1.54917  | -2.68062 | -0.53179 |
| H | -0.09513 | -3.85021 | 0.27338  |
| H | 0.95265  | -3.12835 | 1.49305  |
| H | 1.12897  | -2.77264 | -1.54292 |
| H | 2.33983  | -3.43682 | -0.45995 |
| C | 0.21855  | -0.46490 | 1.04930  |
| O | -0.29241 | 0.35631  | 1.82100  |
| C | -0.51652 | -1.76059 | 0.69163  |
| C | -1.38665 | -1.61902 | -0.59386 |
| H | -0.73552 | -1.43549 | -1.45531 |
| H | -1.85531 | -2.60124 | -0.75050 |
| C | -3.27007 | 1.58023  | -1.25677 |

|   |          |          |          |
|---|----------|----------|----------|
| C | -2.02612 | 0.74689  | -0.96823 |
| N | -2.43884 | -0.61547 | -0.63324 |
| C | -3.34822 | -0.62282 | 0.50953  |
| C | -4.55335 | 0.25818  | 0.19463  |
| O | -4.15168 | 1.58621  | -0.13530 |
| H | -3.79152 | 1.17570  | -2.13915 |
| H | -3.00327 | 2.62378  | -1.44792 |
| H | -1.46201 | 1.22927  | -0.15693 |
| H | -1.38641 | 0.71813  | -1.85802 |
| H | -3.68558 | -1.65061 | 0.69232  |
| H | -2.85923 | -0.25636 | 1.42741  |
| H | -5.11949 | -0.17850 | -0.64382 |
| H | -5.21309 | 0.34021  | 1.06330  |
| C | 2.16119  | 2.19361  | 1.01890  |
| H | 1.71432  | 2.05039  | 2.00765  |
| H | 3.11761  | 2.70890  | 1.16911  |
| C | 1.23242  | 3.08692  | 0.18071  |
| H | 0.25591  | 2.61010  | 0.05121  |
| H | 1.65672  | 3.26586  | -0.81380 |
| H | 1.07602  | 4.05718  | 0.66658  |
| C | 3.49652  | 0.47392  | -0.35977 |
| C | 4.73672  | 1.20994  | -0.74656 |
| H | 5.64198  | 0.66203  | -0.45560 |
| H | 4.79082  | 1.37912  | -1.82979 |
| H | 4.76513  | 2.18664  | -0.25729 |
| H | -1.18568 | -1.97426 | 1.53164  |

4s\_Renantiomer\_conformer-019

|   |          |          |          |
|---|----------|----------|----------|
| C | 2.34808  | -0.87547 | 0.19682  |
| N | 3.06701  | 1.10095  | 0.96913  |
| H | 3.64160  | 1.78653  | 1.44044  |
| C | 1.96216  | 1.38750  | 0.23390  |
| C | 1.47636  | 0.18000  | -0.26875 |
| C | 0.42050  | 2.67897  | -1.20101 |
| C | 1.38457  | 2.74375  | 0.00001  |
| H | -0.18348 | 3.59246  | -1.24083 |
| H | 1.01036  | 2.64441  | -2.12431 |
| H | 0.85668  | 3.09194  | 0.89872  |
| H | 2.17510  | 3.47929  | -0.19104 |
| C | 0.29078  | 0.13464  | -1.09942 |
| O | -0.09122 | -0.86887 | -1.71049 |
| C | -0.50578 | 1.44491  | -1.16820 |
| C | -1.48896 | 1.53711  | 0.01843  |
| H | -0.92548 | 1.73924  | 0.93555  |
| H | -2.14928 | 2.41127  | -0.15030 |

|   |          |          |          |
|---|----------|----------|----------|
| C | -3.86928 | -1.33451 | -0.52797 |
| C | -3.14252 | -0.03417 | -0.84867 |
| N | -2.25232 | 0.31866  | 0.25818  |
| C | -3.01618 | 0.41125  | 1.50167  |
| C | -3.73926 | -0.90396 | 1.76638  |
| O | -4.60669 | -1.24229 | 0.68832  |
| H | -3.13289 | -2.15095 | -0.45800 |
| H | -4.59107 | -1.57666 | -1.31300 |
| H | -3.88433 | 0.76579  | -1.04095 |
| H | -2.54739 | -0.18124 | -1.75246 |
| H | -2.32852 | 0.62379  | 2.32865  |
| H | -3.75987 | 1.23153  | 1.46354  |
| H | -2.99817 | -1.70530 | 1.91655  |
| H | -4.36431 | -0.82881 | 2.66065  |
| C | 2.21939  | -2.33740 | -0.12013 |
| H | 2.77301  | -2.92654 | 0.62084  |
| H | 1.16712  | -2.63226 | -0.03844 |
| C | 2.72037  | -2.68750 | -1.53041 |
| H | 2.13744  | -2.14212 | -2.27812 |
| H | 3.77605  | -2.41732 | -1.64799 |
| H | 2.61736  | -3.76099 | -1.72871 |
| C | 3.32192  | -0.27200 | 0.96286  |
| C | 4.49297  | -0.83192 | 1.70119  |
| H | 4.46574  | -0.57186 | 2.76703  |
| H | 4.50352  | -1.92179 | 1.62311  |
| H | 5.44428  | -0.46077 | 1.29839  |
| H | -1.07363 | 1.41505  | -2.10329 |

4s\_Renantiomer\_conformer-020

|   |          |          |          |
|---|----------|----------|----------|
| C | 3.23532  | 0.54086  | 0.27637  |
| N | 3.43559  | -1.67688 | 0.02440  |
| H | 3.86087  | -2.58912 | -0.07278 |
| C | 2.10183  | -1.43345 | -0.01837 |
| C | 1.92572  | -0.05833 | 0.13528  |
| C | -0.23367 | -1.71410 | -0.71345 |
| C | 1.01336  | -2.43881 | -0.18661 |
| H | -0.06031 | -1.41319 | -1.75564 |
| H | -1.09934 | -2.38122 | -0.70939 |
| H | 1.31776  | -3.24204 | -0.86811 |
| H | 0.78505  | -2.91622 | 0.77852  |
| C | 0.60442  | 0.53423  | 0.17976  |
| O | 0.40156  | 1.74774  | 0.30304  |
| C | -0.57008 | -0.46115 | 0.11274  |
| C | -1.84295 | 0.23447  | -0.38947 |
| H | -1.96924 | 1.17518  | 0.16209  |

|   |          |          |          |
|---|----------|----------|----------|
| H | -1.69308 | 0.51059  | -1.43991 |
| C | -4.41847 | 0.43590  | 1.43435  |
| C | -3.58685 | -0.78049 | 1.02010  |
| N | -3.01408 | -0.64893 | -0.32735 |
| C | -4.08020 | -0.29093 | -1.27036 |
| C | -4.89731 | 0.92089  | -0.81872 |
| O | -5.44907 | 0.69662  | 0.47995  |
| H | -3.77926 | 1.32671  | 1.54211  |
| H | -4.91891 | 0.25794  | 2.39111  |
| H | -4.23656 | -1.66536 | 1.02583  |
| H | -2.78640 | -0.95556 | 1.74610  |
| H | -3.64257 | -0.11126 | -2.25835 |
| H | -4.75848 | -1.15093 | -1.35392 |
| H | -4.27134 | 1.82802  | -0.80703 |
| H | -5.74435 | 1.09643  | -1.48917 |
| C | 3.53265  | 2.00447  | 0.42957  |
| H | 2.85787  | 2.43491  | 1.17760  |
| H | 4.55365  | 2.13627  | 0.80727  |
| C | 3.36961  | 2.78410  | -0.88506 |
| H | 4.03934  | 2.39017  | -1.65802 |
| H | 2.33984  | 2.70088  | -1.24500 |
| H | 3.59865  | 3.84685  | -0.74242 |
| C | 4.14841  | -0.48849 | 0.20123  |
| C | 5.64036  | -0.50082 | 0.26395  |
| H | 6.01983  | 0.50405  | 0.46433  |
| H | 6.00885  | -1.16307 | 1.05770  |
| H | 6.08570  | -0.84233 | -0.67950 |
| H | -0.73088 | -0.78192 | 1.15543  |

4s\_Renantiomer\_conformer-021

|   |          |          |          |
|---|----------|----------|----------|
| C | 3.24011  | 0.52900  | -0.25382 |
| N | 3.44204  | -1.65203 | 0.22035  |
| H | 3.86680  | -2.55474 | 0.38538  |
| C | 2.10642  | -1.41694 | 0.19065  |
| C | 1.92935  | -0.06358 | -0.09671 |
| C | -0.25966 | -1.88738 | -0.25419 |
| C | 1.01804  | -2.41053 | 0.41820  |
| H | -0.14213 | -1.94916 | -1.34465 |
| H | -1.11944 | -2.50649 | 0.01414  |
| H | 1.29297  | -3.39623 | 0.02457  |
| H | 0.84263  | -2.54109 | 1.49692  |
| C | 0.60764  | 0.52204  | -0.19073 |
| O | 0.40268  | 1.70945  | -0.46783 |
| C | -0.56254 | -0.42871 | 0.12766  |
| C | -1.86252 | 0.07519  | -0.51448 |

|   |          |          |          |
|---|----------|----------|----------|
| H | -1.96675 | 1.14704  | -0.30133 |
| H | -1.76697 | -0.01513 | -1.60298 |
| C | -4.35353 | 0.90604  | 1.24702  |
| C | -3.53220 | -0.38545 | 1.23310  |
| N | -3.02342 | -0.72443 | -0.10372 |
| C | -4.13427 | -0.69937 | -1.06237 |
| C | -4.93934 | 0.60043  | -1.01249 |
| O | -5.42884 | 0.83569  | 0.30903  |
| H | -3.71707 | 1.77525  | 1.01650  |
| H | -4.80826 | 1.06780  | 2.22913  |
| H | -4.17354 | -1.21036 | 1.56986  |
| H | -2.69735 | -0.30932 | 1.93720  |
| H | -3.74377 | -0.86972 | -2.07151 |
| H | -4.80885 | -1.53110 | -0.81775 |
| H | -4.32066 | 1.45222  | -1.33897 |
| H | -5.81782 | 0.54456  | -1.66285 |
| C | 3.53706  | 1.97312  | -0.53863 |
| H | 4.56806  | 2.07355  | -0.89844 |
| H | 2.88266  | 2.32497  | -1.34353 |
| C | 3.33515  | 2.87645  | 0.68860  |
| H | 2.29549  | 2.82628  | 1.02550  |
| H | 3.98222  | 2.56188  | 1.51537  |
| H | 3.56800  | 3.92092  | 0.44967  |
| C | 4.15489  | -0.48098 | -0.04821 |
| C | 5.64800  | -0.49001 | -0.07049 |
| H | 6.02911  | 0.49442  | -0.35255 |
| H | 6.06940  | -0.74095 | 0.91154  |
| H | 6.03973  | -1.22008 | -0.79027 |
| H | -0.67119 | -0.38642 | 1.22430  |

4s\_Renantiomer\_conformer-022

|   |          |          |          |
|---|----------|----------|----------|
| C | 3.25486  | 0.40968  | 0.18170  |
| N | 3.13946  | -1.66650 | -0.65380 |
| H | 3.42435  | -2.53661 | -1.08299 |
| C | 1.89914  | -1.41021 | -0.16911 |
| C | 1.91952  | -0.11897 | 0.35948  |
| C | -0.26814 | -1.88753 | 0.89526  |
| C | 0.72875  | -2.33300 | -0.19002 |
| H | -1.20078 | -2.44847 | 0.78268  |
| H | 0.14689  | -2.14878 | 1.87618  |
| H | 0.24996  | -2.31765 | -1.17915 |
| H | 1.04033  | -3.36970 | -0.01622 |
| C | 0.73878  | 0.46921  | 0.95078  |
| O | 0.70055  | 1.59965  | 1.44921  |
| C | -0.54867 | -0.37051 | 0.87305  |

|   |          |          |          |
|---|----------|----------|----------|
| C | -1.36635 | 0.10248  | -0.36001 |
| H | -0.96099 | 1.05204  | -0.72475 |
| H | -1.25606 | -0.62496 | -1.18668 |
| C | -4.95587 | -0.52909 | 0.63506  |
| C | -3.50042 | -0.86591 | 0.32932  |
| N | -2.77635 | 0.34646  | -0.05545 |
| C | -3.44741 | 0.97725  | -1.19438 |
| C | -4.90073 | 1.27571  | -0.84720 |
| O | -5.59586 | 0.08832  | -0.47717 |
| H | -4.99952 | 0.13882  | 1.51011  |
| H | -5.52095 | -1.43842 | 0.85730  |
| H | -3.46077 | -1.63175 | -0.47035 |
| H | -3.04594 | -1.29530 | 1.22685  |
| H | -2.92939 | 1.91158  | -1.43960 |
| H | -3.41737 | 0.33008  | -2.09267 |
| H | -4.94032 | 2.00527  | -0.02274 |
| H | -5.42632 | 1.69086  | -1.71154 |
| C | 3.72646  | 1.78087  | 0.57062  |
| H | 3.38824  | 2.00429  | 1.58835  |
| H | 4.82262  | 1.80362  | 0.58631  |
| C | 3.20566  | 2.87766  | -0.37206 |
| H | 2.11206  | 2.89907  | -0.35378 |
| H | 3.57338  | 3.86450  | -0.06700 |
| H | 3.53170  | 2.69396  | -1.40216 |
| C | 3.98460  | -0.57201 | -0.45189 |
| C | 5.40635  | -0.61778 | -0.90605 |
| H | 5.92796  | 0.29616  | -0.61194 |
| H | 5.94584  | -1.46743 | -0.46850 |
| H | 5.48341  | -0.70850 | -1.99722 |
| H | -1.12702 | -0.09306 | 1.76064  |

#### 4s\_Renantiomer\_conformer-023

|   |          |          |          |
|---|----------|----------|----------|
| C | -3.19152 | 0.42236  | 0.31288  |
| N | -3.04258 | -1.81190 | 0.39921  |
| H | -3.30354 | -2.77830 | 0.54231  |
| C | -1.83868 | -1.39431 | -0.06504 |
| C | -1.88286 | -0.00150 | -0.13650 |
| C | 0.26278  | -1.45782 | -1.34606 |
| C | -0.67694 | -2.25639 | -0.42457 |
| H | 1.19643  | -2.01243 | -1.47913 |
| H | -0.20579 | -1.37705 | -2.33430 |
| H | -0.14439 | -2.57457 | 0.48264  |
| H | -1.00660 | -3.17498 | -0.92429 |
| C | -0.73273 | 0.76663  | -0.55731 |
| O | -0.71677 | 1.99899  | -0.65083 |

|   |          |          |          |
|---|----------|----------|----------|
| C | 0.55371  | -0.03381 | -0.82770 |
| C | 1.43340  | 0.00661  | 0.45163  |
| H | 1.05477  | 0.77802  | 1.13035  |
| H | 1.35478  | -0.95512 | 0.99347  |
| C | 4.96640  | -0.23150 | -0.86629 |
| C | 3.52361  | -0.66094 | -0.62292 |
| N | 2.83009  | 0.34735  | 0.17994  |
| C | 3.55953  | 0.56346  | 1.43156  |
| C | 4.99780  | 0.97080  | 1.13646  |
| O | 5.66347  | -0.01889 | 0.35711  |
| H | 4.97554  | 0.69161  | -1.46757 |
| H | 5.51170  | -1.00981 | -1.40708 |
| H | 3.51401  | -1.65094 | -0.12561 |
| H | 3.02365  | -0.76714 | -1.58996 |
| H | 3.06253  | 1.35768  | 2.00046  |
| H | 3.56510  | -0.34801 | 2.06071  |
| H | 5.00546  | 1.93487  | 0.60350  |
| H | 5.56721  | 1.07547  | 2.06409  |
| C | -3.69391 | 1.83565  | 0.37421  |
| H | -4.57768 | 1.88617  | 1.02133  |
| H | -2.92712 | 2.47123  | 0.83069  |
| C | -4.04075 | 2.40363  | -1.01131 |
| H | -4.81591 | 1.80055  | -1.49772 |
| H | -3.15182 | 2.40355  | -1.64899 |
| H | -4.40712 | 3.43404  | -0.93273 |
| C | -3.88583 | -0.72286 | 0.63550  |
| C | -5.27524 | -0.93422 | 1.14020  |
| H | -5.76435 | 0.02667  | 1.31714  |
| H | -5.88935 | -1.49272 | 0.42195  |
| H | -5.28477 | -1.49456 | 2.08369  |
| H | 1.08857  | 0.53211  | -1.59778 |

#### 4s\_Renantiomer\_conformer-024

|   |          |          |          |
|---|----------|----------|----------|
| C | -3.37088 | 0.29653  | -0.23637 |
| N | -3.12329 | -1.92098 | -0.02458 |
| H | -3.35710 | -2.90021 | 0.06982  |
| C | -1.86238 | -1.42235 | -0.04863 |
| C | -1.96373 | -0.03873 | -0.17933 |
| C | 0.52192  | -1.25969 | 0.51930  |
| C | -0.59126 | -2.19480 | 0.02067  |
| H | 0.36555  | -1.04990 | 1.58558  |
| H | 1.48194  | -1.77295 | 0.43062  |
| H | -0.68964 | -3.06510 | 0.68004  |
| H | -0.32896 | -2.58409 | -0.97470 |
| C | -0.78800 | 0.79796  | -0.29401 |



|   |          |          |          |
|---|----------|----------|----------|
| O | -0.84120 | 2.02284  | -0.45786 |
| C | 0.57614  | 0.07262  | -0.24998 |
| C | 1.65195  | 1.05242  | 0.27622  |
| H | 1.51488  | 1.99090  | -0.26961 |
| H | 1.44888  | 1.26952  | 1.33228  |
| C | 5.01659  | 0.23994  | -1.20541 |
| C | 3.49083  | 0.24907  | -1.15404 |
| N | 3.05659  | 0.67282  | 0.16933  |
| C | 3.61707  | -0.17794 | 1.21271  |
| C | 5.13882  | -0.14827 | 1.10497  |
| O | 5.56452  | -0.58937 | -0.18331 |
| H | 5.39121  | 1.26954  | -1.09104 |
| H | 5.37235  | -0.16405 | -2.15757 |
| H | 3.11957  | -0.75933 | -1.41898 |
| H | 3.10481  | 0.95170  | -1.90218 |
| H | 3.30568  | 0.20227  | 2.19210  |
| H | 3.29291  | -1.23106 | 1.14218  |
| H | 5.50297  | 0.87488  | 1.28938  |
| H | 5.59514  | -0.82638 | 1.83188  |
| C | -3.95442 | 1.67587  | -0.34097 |
| H | -3.43790 | 2.22824  | -1.13355 |
| H | -5.00893 | 1.60874  | -0.63382 |
| C | -3.83753 | 2.47229  | 0.96849  |
| H | -2.78522 | 2.59091  | 1.24283  |
| H | -4.27875 | 3.47031  | 0.86150  |
| H | -4.35266 | 1.95606  | 1.78662  |
| C | -4.06166 | -0.89141 | -0.13403 |
| C | -5.52393 | -1.19381 | -0.11316 |
| H | -5.80516 | -1.89827 | -0.90631 |
| H | -5.83533 | -1.63594 | 0.84210  |
| H | -6.10294 | -0.27874 | -0.25885 |
| H | 0.80977  | -0.15589 | -1.30273 |

4s\_Renantiomer\_conformer-025

|   |          |          |          |
|---|----------|----------|----------|
| C | 3.36557  | 0.27069  | -0.22832 |
| N | 3.11783  | -1.89590 | 0.28936  |
| H | 3.34948  | -2.86085 | 0.48318  |
| C | 1.85856  | -1.39484 | 0.24094  |
| C | 1.96047  | -0.04125 | -0.07414 |
| C | -0.55271 | -1.39429 | -0.22646 |
| C | 0.58971  | -2.13360 | 0.48842  |
| H | -0.45258 | -1.53872 | -1.31023 |
| H | -1.50409 | -1.84119 | 0.07030  |
| H | 0.65777  | -3.17040 | 0.13873  |
| H | 0.38125  | -2.17964 | 1.56797  |

|   |          |          |          |
|---|----------|----------|----------|
| C | 0.78759  | 0.80054  | -0.18050 |
| O | 0.84246  | 2.01162  | -0.42550 |
| C | -0.57390 | 0.11471  | 0.07729  |
| C | -1.68075 | 0.88757  | -0.67870 |
| H | -1.51608 | 1.94993  | -0.47486 |
| H | -1.53848 | 0.74786  | -1.75757 |
| C | -4.95587 | 0.65975  | 1.16462  |
| C | -3.43526 | 0.62741  | 1.03207  |
| N | -3.07607 | 0.58563  | -0.37808 |
| C | -3.69112 | -0.55194 | -1.05184 |
| C | -5.20469 | -0.46462 | -0.87933 |
| O | -5.55725 | -0.45084 | 0.50306  |
| H | -5.33913 | 1.60025  | 0.73791  |
| H | -5.25731 | 0.59685  | 2.21418  |
| H | -3.04746 | -0.24360 | 1.59409  |
| H | -3.01021 | 1.53074  | 1.48567  |
| H | -3.43507 | -0.52025 | -2.11682 |
| H | -3.36105 | -1.52815 | -0.65543 |
| H | -5.58119 | 0.44654  | -1.37073 |
| H | -5.69872 | -1.33685 | -1.31706 |
| C | 3.95267  | 1.61736  | -0.53882 |
| H | 4.98063  | 1.49666  | -0.90119 |
| H | 3.38180  | 2.08311  | -1.34948 |
| C | 3.94676  | 2.56300  | 0.67296  |
| H | 4.52029  | 2.13628  | 1.50375  |
| H | 4.38729  | 3.53355  | 0.41555  |
| H | 2.92022  | 2.73134  | 1.01130  |
| C | 4.05502  | -0.89958 | 0.00460  |
| C | 5.51520  | -1.21239 | -0.00591 |
| H | 6.08889  | -0.33444 | -0.31254 |
| H | 5.87532  | -1.51488 | 0.98594  |
| H | 5.75164  | -2.02730 | -0.70194 |
| H | -0.75066 | 0.23765  | 1.15846  |

4s\_Renantiomer\_conformer-026

|   |          |          |          |
|---|----------|----------|----------|
| C | 2.64188  | 0.72054  | 0.28628  |
| N | 3.34231  | -1.22896 | -0.56992 |
| H | 3.94043  | -1.91513 | -1.01024 |
| C | 2.07455  | -1.46124 | -0.14982 |
| C | 1.59288  | -0.27053 | 0.39430  |
| C | -0.17390 | -2.43098 | -0.22895 |
| C | 1.32881  | -2.75008 | -0.21433 |
| H | -0.43426 | -1.98500 | -1.19342 |
| H | -0.75594 | -3.35517 | -0.14228 |
| H | 1.61264  | -3.32760 | -1.10193 |

|   |          |          |          |
|---|----------|----------|----------|
| H | 1.57376  | -3.37391 | 0.65855  |
| C | 0.28040  | -0.19498 | 0.99625  |
| O | -0.13519 | 0.79736  | 1.60709  |
| C | -0.58565 | -1.47131 | 0.90199  |
| C | -2.08891 | -1.14812 | 0.88597  |
| H | -2.63331 | -2.03807 | 1.22141  |
| H | -2.26614 | -0.36016 | 1.63164  |
| C | -4.59698 | 0.58109  | 0.11221  |
| C | -4.07650 | -0.73572 | -0.47150 |
| N | -2.61142 | -0.83103 | -0.44998 |
| C | -2.05339 | 0.37026  | -1.08747 |
| C | -2.59370 | 1.66874  | -0.48998 |
| O | -4.02304 | 1.69856  | -0.56673 |
| H | -4.37267 | 0.64303  | 1.18908  |
| H | -5.68086 | 0.66352  | -0.01633 |
| H | -4.40449 | -0.80340 | -1.51765 |
| H | -4.50285 | -1.58716 | 0.07108  |
| H | -0.96166 | 0.34969  | -1.04043 |
| H | -2.33290 | 0.33490  | -2.14906 |
| H | -2.26650 | 1.77381  | 0.55387  |
| H | -2.23681 | 2.53625  | -1.05424 |
| C | 2.54658  | 2.15996  | 0.70158  |
| H | 2.16096  | 2.21713  | 1.72541  |
| H | 3.54702  | 2.60832  | 0.71147  |
| C | 1.62685  | 2.98244  | -0.21565 |
| H | 0.60996  | 2.57944  | -0.18971 |
| H | 1.58719  | 4.02983  | 0.10585  |
| H | 1.98308  | 2.95525  | -1.25169 |
| C | 3.70951  | 0.09689  | -0.32149 |
| C | 5.05722  | 0.59768  | -0.72478 |
| H | 5.19661  | 0.56196  | -1.81300 |
| H | 5.18710  | 1.63520  | -0.40784 |
| H | 5.86304  | 0.00573  | -0.27253 |
| H | -0.40170 | -1.98377 | 1.86065  |

4s\_Renantiomer\_conformer-027

|   |          |          |          |
|---|----------|----------|----------|
| C | -2.35916 | -0.04844 | 0.05947  |
| N | -1.53874 | -0.32222 | -2.00765 |
| H | -1.44681 | -0.65314 | -2.95870 |
| C | -0.73971 | 0.61035  | -1.43120 |
| C | -1.21094 | 0.81250  | -0.13301 |
| C | 0.78421  | 2.53712  | -1.25454 |
| C | 0.42859  | 1.27990  | -2.06869 |
| H | 1.76624  | 2.91364  | -1.56366 |
| H | 0.05453  | 3.32071  | -1.49355 |

|   |          |          |          |
|---|----------|----------|----------|
| H | 1.27821  | 0.58964  | -2.08725 |
| H | 0.20384  | 1.55290  | -3.10753 |
| C | -0.53142 | 1.69980  | 0.78372  |
| O | -0.90296 | 1.91966  | 1.94402  |
| C | 0.77279  | 2.32549  | 0.27253  |
| C | 1.99345  | 1.52517  | 0.79296  |
| H | 2.89458  | 2.04309  | 0.44610  |
| H | 2.00247  | 1.57315  | 1.89440  |
| C | 1.37336  | -2.18391 | 0.59159  |
| C | 1.45542  | -0.81701 | 1.25677  |
| N | 2.04453  | 0.14121  | 0.32427  |
| C | 3.37333  | -0.31200 | -0.07704 |
| C | 3.26085  | -1.69438 | -0.71343 |
| O | 2.66126  | -2.63339 | 0.17470  |
| H | 0.69480  | -2.12458 | -0.27422 |
| H | 0.99284  | -2.93495 | 1.28963  |
| H | 2.05538  | -0.89514 | 2.18467  |
| H | 0.45162  | -0.49347 | 1.53428  |
| H | 3.78759  | 0.38934  | -0.80967 |
| H | 4.07321  | -0.36198 | 0.77970  |
| H | 2.66474  | -1.62108 | -1.63753 |
| H | 4.25019  | -2.08897 | -0.96206 |
| C | -3.16735 | -0.19519 | 1.31673  |
| H | -3.39903 | 0.79763  | 1.71784  |
| H | -4.12526 | -0.67465 | 1.08234  |
| C | -2.44586 | -1.00789 | 2.40402  |
| H | -1.53169 | -0.49352 | 2.71365  |
| H | -3.08251 | -1.13251 | 3.28803  |
| H | -2.17587 | -2.00333 | 2.03316  |
| C | -2.53281 | -0.74088 | -1.11861 |
| C | -3.53125 | -1.77245 | -1.52907 |
| H | -4.07328 | -1.47579 | -2.43608 |
| H | -3.05635 | -2.74063 | -1.73430 |
| H | -4.26671 | -1.92610 | -0.73572 |
| H | 0.83938  | 3.30762  | 0.75708  |

4s\_Renantiomer\_conformer-028

|   |          |          |          |
|---|----------|----------|----------|
| C | 2.62453  | 0.69065  | -0.18235 |
| N | 3.22914  | -1.43564 | -0.55263 |
| H | 3.78359  | -2.23129 | -0.83939 |
| C | 1.97538  | -1.50741 | -0.04124 |
| C | 1.55523  | -0.20120 | 0.21142  |
| C | -0.30523 | -2.37610 | 0.19919  |
| C | 1.18650  | -2.74257 | 0.23090  |
| H | -0.60066 | -2.16743 | -0.83344 |

|   |          |          |          |
|---|----------|----------|----------|
| H | -0.90846 | -3.22743 | 0.53323  |
| H | 1.41001  | -3.52590 | -0.50286 |
| H | 1.45219  | -3.15112 | 1.21768  |
| C | 0.26193  | 0.07530  | 0.79654  |
| O | -0.11369 | 1.20900  | 1.11934  |
| C | -0.62999 | -1.15467 | 1.07769  |
| C | -2.12685 | -0.80553 | 1.08013  |
| H | -2.65205 | -1.56644 | 1.66836  |
| H | -2.24496 | 0.15071  | 1.60940  |
| C | -4.68941 | 0.70705  | 0.07657  |
| C | -4.20588 | -0.71993 | -0.19757 |
| N | -2.74252 | -0.82678 | -0.25354 |
| C | -2.23517 | 0.17061  | -1.20669 |
| C | -2.73819 | 1.58406  | -0.91533 |
| O | -4.16946 | 1.61349  | -0.89650 |
| H | -4.38980 | 1.03067  | 1.08625  |
| H | -5.78001 | 0.76980  | 0.00732  |
| H | -4.60567 | -1.03915 | -1.16961 |
| H | -4.59009 | -1.40537 | 0.56638  |
| H | -1.14278 | 0.14886  | -1.22820 |
| H | -2.58663 | -0.12412 | -2.20469 |
| H | -2.33726 | 1.94119  | 0.04365  |
| H | -2.42720 | 2.27896  | -1.70183 |
| C | 2.62394  | 2.18783  | -0.06807 |
| H | 3.38239  | 2.60947  | -0.73857 |
| H | 1.65433  | 2.57422  | -0.40075 |
| C | 2.88264  | 2.67632  | 1.36620  |
| H | 3.85281  | 2.31979  | 1.73069  |
| H | 2.88037  | 3.77175  | 1.41402  |
| H | 2.10266  | 2.30200  | 2.03562  |
| C | 3.64634  | -0.10548 | -0.65175 |
| C | 4.99550  | 0.22933  | -1.19703 |
| H | 5.13859  | -0.17539 | -2.20705 |
| H | 5.12400  | 1.31313  | -1.24997 |
| H | 5.80075  | -0.17066 | -0.56743 |
| H | -0.38483 | -1.41886 | 2.11992  |

4s\_Renantiomer\_conformer-029

|   |          |          |          |
|---|----------|----------|----------|
| C | -2.15656 | 0.42250  | -0.17918 |
| N | -1.25311 | 1.11143  | 1.75171  |
| H | -1.07770 | 1.67576  | 2.57212  |
| C | -0.62929 | -0.05934 | 1.46775  |
| C | -1.16356 | -0.53163 | 0.26827  |
| C | 0.62647  | -2.15233 | 1.80711  |
| C | 0.45073  | -0.69554 | 2.27293  |

|   |          |          |          |
|---|----------|----------|----------|
| H | 1.56105  | -2.56001 | 2.20966  |
| H | -0.18914 | -2.75137 | 2.23077  |
| H | 1.38298  | -0.13791 | 2.13433  |
| H | 0.21056  | -0.66777 | 3.34345  |
| C | -0.63117 | -1.70779 | -0.38148 |
| O | -1.06092 | -2.17008 | -1.44691 |
| C | 0.60433  | -2.33371 | 0.27638  |
| C | 1.89093  | -1.82766 | -0.42479 |
| H | 2.74367  | -2.31355 | 0.06256  |
| H | 1.88117  | -2.17511 | -1.47083 |
| C | 1.61291  | 1.83557  | -1.24701 |
| C | 1.58042  | 0.33884  | -1.52489 |
| N | 2.07418  | -0.37944 | -0.35212 |
| C | 3.43479  | 0.04941  | -0.04428 |
| C | 3.43961  | 1.55567  | 0.20068  |
| O | 2.93226  | 2.27076  | -0.92228 |
| H | 0.92362  | 2.06434  | -0.41899 |
| H | 1.30822  | 2.40366  | -2.13052 |
| H | 2.19549  | 0.11753  | -2.41919 |
| H | 0.55526  | 0.03388  | -1.74216 |
| H | 3.77924  | -0.46408 | 0.86013  |
| H | 4.14338  | -0.18874 | -0.86136 |
| H | 2.83138  | 1.77966  | 1.09204  |
| H | 4.45766  | 1.91930  | 0.36716  |
| C | -2.99491 | 0.31599  | -1.41966 |
| H | -3.44407 | 1.29037  | -1.64594 |
| H | -2.35252 | 0.05705  | -2.26911 |
| C | -4.10189 | -0.74356 | -1.30260 |
| H | -4.77345 | -0.51614 | -0.46680 |
| H | -3.65869 | -1.72910 | -1.13247 |
| H | -4.70037 | -0.78963 | -2.22020 |
| C | -2.18782 | 1.42806  | 0.76155  |
| C | -3.00421 | 2.67425  | 0.86104  |
| H | -3.64175 | 2.78170  | -0.01982 |
| H | -3.65607 | 2.66615  | 1.74431  |
| H | -2.37313 | 3.56960  | 0.92914  |
| H | 0.55026  | -3.40728 | 0.05707  |

#### 4s\_Renantiomer\_conformer-030

|   |          |          |          |
|---|----------|----------|----------|
| C | -3.10921 | 0.44983  | -0.06506 |
| N | -2.92205 | -1.70566 | 0.51788  |
| H | -3.16656 | -2.61962 | 0.87472  |
| C | -1.73720 | -1.39185 | -0.06308 |
| C | -1.80383 | -0.04922 | -0.43984 |
| C | 0.30622  | -1.74083 | -1.39001 |

|   |          |          |          |
|---|----------|----------|----------|
| C | -0.57519 | -2.30549 | -0.26247 |
| H | 1.25636  | -2.28016 | -1.42345 |
| H | -0.20348 | -1.89773 | -2.34824 |
| H | 0.00764  | -2.38763 | 0.66637  |
| H | -0.90955 | -3.32063 | -0.50668 |
| C | -0.68268 | 0.60755  | -1.07771 |
| O | -0.68077 | 1.78964  | -1.44087 |
| C | 0.59019  | -0.23897 | -1.22179 |
| C | 1.48198  | 0.06676  | 0.00615  |
| H | 1.62433  | 1.15807  | 0.05491  |
| H | 0.94081  | -0.21413 | 0.91614  |
| C | 4.45444  | 1.06839  | -0.43155 |
| C | 3.73515  | -0.17688 | -0.95480 |
| N | 2.73294  | -0.69218 | -0.01106 |
| C | 3.35021  | -0.85840 | 1.31036  |
| C | 4.07238  | 0.40052  | 1.79365  |
| O | 5.05301  | 0.81281  | 0.84025  |
| H | 3.75598  | 1.91646  | -0.34908 |
| H | 5.26666  | 1.36042  | -1.10411 |
| H | 4.47944  | -0.96656 | -1.11999 |
| H | 3.26025  | 0.03518  | -1.91764 |
| H | 2.58318  | -1.16177 | 2.03124  |
| H | 4.08483  | -1.67168 | 1.23820  |
| H | 3.35297  | 1.21742  | 1.96695  |
| H | 4.60904  | 0.21137  | 2.72848  |
| C | -3.60847 | 1.85438  | -0.24439 |
| H | -4.70045 | 1.87363  | -0.14651 |
| H | -3.37380 | 2.19582  | -1.25862 |
| C | -2.98800 | 2.83701  | 0.76187  |
| H | -3.37489 | 3.85158  | 0.60977  |
| H | -3.21328 | 2.53509  | 1.79106  |
| H | -1.90122 | 2.86280  | 0.63927  |
| C | -3.77611 | -0.59995 | 0.52794  |
| C | -5.14369 | -0.70341 | 1.11864  |
| H | -5.68647 | 0.23550  | 0.98543  |
| H | -5.73169 | -1.50045 | 0.64590  |
| H | -5.10839 | -0.91758 | 2.19464  |
| H | 1.09706  | 0.13336  | -2.11886 |

4s\_Renantiomer\_conformer-031

|   |          |          |          |
|---|----------|----------|----------|
| C | -3.02541 | 0.32021  | 0.46314  |
| N | -2.79235 | -1.87118 | 0.05754  |
| H | -3.00361 | -2.85914 | 0.01671  |
| C | -1.65900 | -1.30012 | -0.42143 |
| C | -1.75806 | 0.07301  | -0.18996 |

|   |          |          |          |
|---|----------|----------|----------|
| C | 0.29891  | -0.98335 | -1.87979 |
| C | -0.51054 | -2.00452 | -1.06184 |
| H | 1.24650  | -1.42790 | -2.19466 |
| H | -0.26746 | -0.72584 | -2.78287 |
| H | 0.12860  | -2.46465 | -0.29442 |
| H | -0.85824 | -2.82297 | -1.70337 |
| C | -0.68027 | 0.97313  | -0.54134 |
| O | -0.70748 | 2.19666  | -0.36482 |
| C | 0.58772  | 0.30674  | -1.09411 |
| C | 1.54353  | 0.07876  | 0.10190  |
| H | 1.68389  | 1.04665  | 0.60900  |
| H | 1.05374  | -0.58035 | 0.82678  |
| C | 4.22513  | -0.31203 | 1.73576  |
| C | 3.48380  | -1.26312 | 0.79457  |
| N | 2.79531  | -0.56529 | -0.29797 |
| C | 3.74237  | 0.33126  | -0.97609 |
| C | 4.48332  | 1.25273  | -0.00458 |
| O | 5.15089  | 0.49463  | 1.00574  |
| H | 4.81245  | -0.86756 | 2.47340  |
| H | 3.51242  | 0.33253  | 2.27565  |
| H | 2.75811  | -1.86601 | 1.35128  |
| H | 4.21736  | -1.94722 | 0.34714  |
| H | 4.48023  | -0.29128 | -1.49844 |
| H | 3.21476  | 0.92133  | -1.73173 |
| H | 5.25671  | 1.82607  | -0.52467 |
| H | 3.78661  | 1.96492  | 0.46580  |
| C | -3.56647 | 1.65893  | 0.87416  |
| H | -4.38879 | 1.52172  | 1.58640  |
| H | -2.78358 | 2.22019  | 1.39642  |
| C | -4.05698 | 2.49484  | -0.31876 |
| H | -3.23003 | 2.68178  | -1.01008 |
| H | -4.85143 | 1.97076  | -0.86226 |
| H | -4.45084 | 3.46205  | 0.01523  |
| C | -3.64256 | -0.90406 | 0.59961  |
| C | -4.96255 | -1.29395 | 1.17877  |
| H | -4.85223 | -2.03408 | 1.98155  |
| H | -5.46620 | -0.41945 | 1.59766  |
| H | -5.62732 | -1.72960 | 0.42164  |
| H | 1.04282  | 1.04239  | -1.76639 |

4s\_Renantiomer\_conformer-032

|   |          |          |          |
|---|----------|----------|----------|
| C | -3.24860 | 0.20079  | -0.05768 |
| N | -2.64835 | -1.95744 | -0.00374 |
| H | -2.71684 | -2.96202 | 0.08901  |
| C | -1.52627 | -1.28618 | -0.36558 |



|   |          |          |          |
|---|----------|----------|----------|
| C | -1.85090 | 0.07108  | -0.40736 |
| C | 0.60120  | -0.87248 | -1.51637 |
| C | -0.19259 | -1.88143 | -0.66983 |
| H | 1.63315  | -1.20984 | -1.63956 |
| H | 0.15910  | -0.84049 | -2.52003 |
| H | 0.34584  | -2.10908 | 0.26113  |
| H | -0.29744 | -2.83255 | -1.20483 |
| C | -0.86045 | 1.07283  | -0.74401 |
| O | -1.09092 | 2.28657  | -0.80594 |
| C | 0.56988  | 0.55182  | -0.93393 |
| C | 1.27867  | 0.72734  | 0.44495  |
| H | 1.14761  | 1.78242  | 0.71896  |
| H | 0.75508  | 0.13620  | 1.20494  |
| C | 5.00702  | 0.89731  | -0.04510 |
| C | 3.54650  | 1.02282  | -0.47008 |
| N | 2.69617  | 0.41299  | 0.54379  |
| C | 3.06347  | -0.97636 | 0.79497  |
| C | 4.53384  | -1.03239 | 1.19940  |
| O | 5.36205  | -0.46376 | 0.18736  |
| H | 5.17390  | 1.48781  | 0.86966  |
| H | 5.67362  | 1.26323  | -0.83111 |
| H | 3.42286  | 0.55372  | -1.46375 |
| H | 3.28422  | 2.08280  | -0.56854 |
| H | 2.44343  | -1.36869 | 1.60877  |
| H | 2.92403  | -1.63201 | -0.08216 |
| H | 4.67669  | -0.49085 | 2.14787  |
| H | 4.86292  | -2.06763 | 1.32637  |
| C | -4.01719 | 1.48464  | 0.06479  |
| H | -3.80439 | 2.11808  | -0.80326 |
| H | -5.09326 | 1.27426  | 0.05050  |
| C | -3.66561 | 2.26582  | 1.34121  |
| H | -3.87658 | 1.66778  | 2.23508  |
| H | -2.60269 | 2.52456  | 1.34116  |
| H | -4.24504 | 3.19444  | 1.40547  |
| C | -3.71225 | -1.07296 | 0.18963  |
| C | -5.05603 | -1.57989 | 0.59855  |
| H | -5.77508 | -0.75816 | 0.63884  |
| H | -5.44049 | -2.32762 | -0.10676 |
| H | -5.03082 | -2.04888 | 1.59065  |
| H | 1.05228  | 1.23479  | -1.64151 |

4s\_Renantiomer\_conformer-033

|   |         |          |          |
|---|---------|----------|----------|
| C | 2.79725 | 0.53737  | 0.15086  |
| N | 3.03622 | -1.41327 | -0.92664 |
| H | 3.43875 | -2.13682 | -1.50694 |

|   |          |          |          |
|---|----------|----------|----------|
| C | 1.83410  | -1.49541 | -0.30460 |
| C | 1.63873  | -0.29815 | 0.38310  |
| C | -0.51663 | -2.11020 | -0.02795 |
| C | 0.89204  | -2.65063 | -0.31783 |
| H | -0.83745 | -1.51579 | -0.88925 |
| H | -1.22462 | -2.93957 | 0.07497  |
| H | 0.91754  | -3.17336 | -1.28104 |
| H | 1.17772  | -3.38657 | 0.44894  |
| C | 0.47563  | -0.08991 | 1.21998  |
| O | 0.32291  | 0.90579  | 1.93779  |
| C | -0.55787 | -1.23705 | 1.23875  |
| C | -1.97362 | -0.74326 | 1.62818  |
| H | -2.55032 | -1.60348 | 1.98555  |
| H | -1.84262 | -0.06032 | 2.47429  |
| C | -4.61071 | -0.04179 | -0.98420 |
| C | -3.55391 | -0.89998 | -0.29587 |
| N | -2.79786 | -0.06612 | 0.63252  |
| C | -2.19286 | 1.07702  | -0.03861 |
| C | -3.27494 | 1.87055  | -0.76454 |
| O | -4.00664 | 1.05094  | -1.67357 |
| H | -5.32508 | 0.33717  | -0.23591 |
| H | -5.15477 | -0.62159 | -1.73554 |
| H | -2.92875 | -1.36268 | -1.07858 |
| H | -4.04021 | -1.70796 | 0.26265  |
| H | -1.70522 | 1.71178  | 0.70618  |
| H | -1.41797 | 0.77599  | -0.77005 |
| H | -3.96319 | 2.30945  | -0.02439 |
| H | -2.83283 | 2.67581  | -1.35845 |
| C | 3.00009  | 1.93422  | 0.66192  |
| H | 2.79427  | 1.96022  | 1.73763  |
| H | 4.04840  | 2.22715  | 0.53002  |
| C | 2.09104  | 2.95826  | -0.03668 |
| H | 1.03998  | 2.70458  | 0.13068  |
| H | 2.26571  | 3.96821  | 0.35265  |
| H | 2.27551  | 2.97094  | -1.11693 |
| C | 3.64100  | -0.18007 | -0.66911 |
| C | 4.96702  | 0.15294  | -1.26990 |
| H | 5.73248  | -0.58624 | -1.00133 |
| H | 4.92013  | 0.19157  | -2.36594 |
| H | 5.30844  | 1.12952  | -0.91839 |
| H | -0.23290 | -1.86952 | 2.08317  |

4s\_Renantiomer\_conformer-034

|   |         |          |          |
|---|---------|----------|----------|
| C | 3.19209 | 0.10633  | -0.35742 |
| N | 2.57468 | -1.97763 | 0.18754  |

|   |          |          |          |
|---|----------|----------|----------|
| H | 2.62512  | -2.97562 | 0.34216  |
| C | 1.48709  | -1.20772 | 0.44166  |
| C | 1.82452  | 0.10707  | 0.11518  |
| C | -0.56278 | -0.46059 | 1.56351  |
| C | 0.17121  | -1.67343 | 0.96799  |
| H | -1.58660 | -0.73137 | 1.83253  |
| H | -0.05827 | -0.17497 | 2.49500  |
| H | -0.42454 | -2.12593 | 0.16260  |
| H | 0.30367  | -2.45310 | 1.72736  |
| C | 0.85882  | 1.18125  | 0.22268  |
| O | 1.09673  | 2.36224  | -0.05785 |
| C | -0.56045 | 0.75887  | 0.62438  |
| C | -1.35442 | 0.58062  | -0.70639 |
| H | -1.23241 | 1.52154  | -1.25881 |
| H | -0.88637 | -0.20407 | -1.31154 |
| C | -5.04151 | 0.96900  | -0.05335 |
| C | -3.55523 | 1.16449  | 0.23343  |
| N | -2.77826 | 0.28763  | -0.63279 |
| C | -3.17332 | -1.10892 | -0.48494 |
| C | -4.66738 | -1.23157 | -0.77028 |
| O | -5.42269 | -0.39573 | 0.10399  |
| H | -5.26314 | 1.30225  | -1.07959 |
| H | -5.65188 | 1.54567  | 0.64734  |
| H | -3.37081 | 0.97071  | 1.30638  |
| H | -3.27788 | 2.20592  | 0.03190  |
| H | -2.61125 | -1.71761 | -1.20208 |
| H | -2.98296 | -1.51381 | 0.52424  |
| H | -4.86695 | -0.95495 | -1.81763 |
| H | -5.01327 | -2.25492 | -0.59921 |
| C | 3.98241  | 1.30682  | -0.79107 |
| H | 4.86254  | 0.98368  | -1.35965 |
| H | 3.37226  | 1.91553  | -1.46753 |
| C | 4.42985  | 2.18348  | 0.38956  |
| H | 3.55614  | 2.55308  | 0.93431  |
| H | 5.05537  | 1.61228  | 1.08500  |
| H | 5.00729  | 3.04751  | 0.04001  |
| C | 3.62819  | -1.19942 | -0.29818 |
| C | 4.94023  | -1.82612 | -0.63842 |
| H | 5.62264  | -1.07797 | -1.04883 |
| H | 5.42211  | -2.26755 | 0.24355  |
| H | 4.82935  | -2.62382 | -1.38388 |
| H | -0.99336 | 1.61452  | 1.15389  |

4s\_Renantiomer\_conformer-035

|   |         |         |          |
|---|---------|---------|----------|
| C | 2.87547 | 0.73248 | -0.28418 |
|---|---------|---------|----------|

|   |          |          |          |
|---|----------|----------|----------|
| N | 3.64479  | -1.32228 | 0.17347  |
| H | 4.29239  | -2.08257 | 0.33215  |
| C | 2.29439  | -1.44520 | 0.15018  |
| C | 1.76693  | -0.18446 | -0.12658 |
| C | 0.12064  | -2.51406 | -0.26297 |
| C | 1.50627  | -2.68968 | 0.37718  |
| H | 0.21831  | -2.55727 | -1.35573 |
| H | -0.53149 | -3.34148 | 0.03611  |
| H | 2.01893  | -3.56580 | -0.03696 |
| H | 1.39166  | -2.87339 | 1.45624  |
| C | 0.33890  | 0.03317  | -0.22007 |
| O | -0.16410 | 1.12260  | -0.52019 |
| C | -0.54640 | -1.17952 | 0.13045  |
| C | -1.97099 | -1.06320 | -0.44649 |
| H | -1.95967 | -0.35731 | -1.28927 |
| H | -2.26526 | -2.03677 | -0.85367 |
| C | -3.39572 | 1.69877  | 0.18393  |
| C | -2.85738 | 0.62694  | 1.13154  |
| N | -2.96831 | -0.73406 | 0.58310  |
| C | -4.34913 | -0.95350 | 0.13380  |
| C | -4.86015 | 0.14298  | -0.80393 |
| O | -4.75113 | 1.42462  | -0.18508 |
| H | -2.76364 | 1.76053  | -0.71306 |
| H | -3.40194 | 2.67963  | 0.67008  |
| H | -3.43882 | 0.65645  | 2.06292  |
| H | -1.81456 | 0.84183  | 1.37434  |
| H | -4.42005 | -1.93368 | -0.35160 |
| H | -4.99292 | -0.97071 | 1.02374  |
| H | -4.29781 | 0.13603  | -1.75176 |
| H | -5.92037 | -0.00226 | -1.03457 |
| C | 2.78064  | 2.20578  | -0.55745 |
| H | 3.75339  | 2.58093  | -0.89699 |
| H | 2.07039  | 2.37773  | -1.37355 |
| C | 2.32373  | 3.01049  | 0.67002  |
| H | 1.32969  | 2.68147  | 0.98706  |
| H | 3.01739  | 2.87237  | 1.50720  |
| H | 2.27297  | 4.08135  | 0.44018  |
| C | 4.02405  | -0.00318 | -0.08808 |
| C | 5.46715  | 0.37999  | -0.11300 |
| H | 5.57600  | 1.43098  | -0.39119 |
| H | 5.94236  | 0.24421  | 0.86708  |
| H | 6.03428  | -0.21887 | -0.83699 |
| H | -0.63502 | -1.17381 | 1.22830  |

4s\_Renantiomer\_conformer-036

|   |          |          |          |
|---|----------|----------|----------|
| C | 2.72061  | -0.48969 | 0.35012  |
| N | 2.86577  | 1.72079  | 0.69109  |
| H | 3.21447  | 2.61296  | 1.01496  |
| C | 1.71073  | 1.54189  | 0.00349  |
| C | 1.57753  | 0.17474  | -0.23773 |
| C | -0.62803 | 1.94370  | -0.59080 |
| C | 0.75370  | 2.59732  | -0.43480 |
| H | -0.99451 | 1.67763  | 0.40575  |
| H | -1.33794 | 2.66133  | -1.01586 |
| H | 0.71471  | 3.42254  | 0.28570  |
| H | 1.07453  | 3.03019  | -1.39443 |
| C | 0.46193  | -0.35290 | -0.99493 |
| O | 0.35681  | -1.54374 | -1.31296 |
| C | -0.58055 | 0.68235  | -1.47132 |
| C | -1.96373 | 0.04155  | -1.74573 |
| H | -2.51916 | 0.70233  | -2.42035 |
| H | -1.77241 | -0.89263 | -2.28442 |
| C | -4.77112 | 0.23824  | 0.77386  |
| C | -3.67233 | 0.82581  | -0.10625 |
| N | -2.85108 | -0.26180 | -0.62764 |
| C | -2.28855 | -1.07277 | 0.44435  |
| C | -3.41539 | -1.58900 | 1.33400  |
| O | -4.21245 | -0.52189 | 1.84362  |
| H | -5.43058 | -0.40121 | 0.16551  |
| H | -5.36807 | 1.03121  | 1.23378  |
| H | -3.10390 | 1.55282  | 0.49865  |
| H | -4.12178 | 1.36956  | -0.94503 |
| H | -1.74496 | -1.91515 | 0.00837  |
| H | -1.57029 | -0.50740 | 1.06911  |
| H | -4.04821 | -2.28117 | 0.75557  |
| H | -3.01290 | -2.11858 | 2.20242  |
| C | 3.01237  | -1.96221 | 0.31502  |
| H | 3.72632  | -2.21578 | 1.10788  |
| H | 2.09189  | -2.51735 | 0.52607  |
| C | 3.56833  | -2.42777 | -1.04026 |
| H | 4.49874  | -1.90124 | -1.28187 |
| H | 3.77663  | -3.50425 | -1.03029 |
| H | 2.84071  | -2.22611 | -1.83174 |
| C | 3.49843  | 0.49598  | 0.91816  |
| C | 4.78885  | 0.43533  | 1.66711  |
| H | 5.59371  | 0.96057  | 1.13682  |
| H | 4.70310  | 0.88904  | 2.66273  |
| H | 5.10202  | -0.60319 | 1.79897  |
| H | -0.20643 | 0.99048  | -2.46328 |

4s\_Renantiomer\_conformer-037

|   |          |          |          |
|---|----------|----------|----------|
| C | -2.86582 | 0.75713  | -0.19049 |
| N | -3.62391 | -1.35195 | -0.19226 |
| H | -4.26650 | -2.13246 | -0.21347 |
| C | -2.27779 | -1.45801 | -0.06608 |
| C | -1.75753 | -0.16437 | -0.06018 |
| C | -0.12521 | -2.38881 | 0.66707  |
| C | -1.48592 | -2.71663 | 0.03374  |
| H | -0.26445 | -2.17721 | 1.73541  |
| H | 0.53532  | -3.25923 | 0.59363  |
| H | -2.01686 | -3.47470 | 0.62156  |
| H | -1.33146 | -3.14683 | -0.96742 |
| C | -0.33290 | 0.07741  | 0.02693  |
| O | 0.16222  | 1.20976  | 0.07860  |
| C | 0.56116  | -1.17843 | 0.00005  |
| C | 1.96230  | -0.92388 | 0.59043  |
| H | 1.92020  | -0.04121 | 1.24435  |
| H | 2.23532  | -1.77427 | 1.22489  |
| C | 3.42653  | 1.62200  | -0.60075 |
| C | 2.92179  | 0.35863  | -1.29773 |
| N | 3.00214  | -0.83879 | -0.44617 |
| C | 4.36245  | -0.94355 | 0.09726  |
| C | 4.84130  | 0.34126  | 0.77761  |
| O | 4.76419  | 1.44583  | -0.12313 |
| H | 2.75850  | 1.88562  | 0.23128  |
| H | 3.45794  | 2.46486  | -1.29863 |
| H | 3.54147  | 0.17503  | -2.18581 |
| H | 1.89111  | 0.50764  | -1.62645 |
| H | 4.40836  | -1.78551 | 0.79751  |
| H | 5.04147  | -1.16248 | -0.73807 |
| H | 4.24131  | 0.55018  | 1.67818  |
| H | 5.89058  | 0.25715  | 1.07807  |
| C | -2.78174 | 2.25607  | -0.19967 |
| H | -1.96768 | 2.56819  | -0.86305 |
| H | -3.70747 | 2.67472  | -0.61217 |
| C | -2.53135 | 2.84680  | 1.19705  |
| H | -3.33326 | 2.56585  | 1.88928  |
| H | -1.58335 | 2.47459  | 1.59630  |
| H | -2.48121 | 3.94137  | 1.15702  |
| C | -4.00741 | -0.01059 | -0.26871 |
| C | -5.44789 | 0.36092  | -0.39873 |
| H | -5.55221 | 1.44363  | -0.50247 |
| H | -5.91125 | -0.10659 | -1.27683 |
| H | -6.02930 | 0.05362  | 0.48020  |
| H | 0.69266  | -1.42710 | -1.06478 |

## 4s\_Renantiomer\_conformer-038

|   |          |          |          |
|---|----------|----------|----------|
| C | -3.03672 | 0.60062  | 0.14859  |
| N | -3.40949 | -1.47830 | -0.60031 |
| H | -3.90003 | -2.28886 | -0.95335 |
| C | -2.09422 | -1.44971 | -0.26967 |
| C | -1.81131 | -0.16727 | 0.19887  |
| C | 0.04852  | -2.30191 | 0.57604  |
| C | -1.12029 | -2.57269 | -0.38342 |
| H | -0.28959 | -2.45372 | 1.60969  |
| H | 0.85316  | -3.02229 | 0.39267  |
| H | -1.59548 | -3.53494 | -0.15909 |
| H | -0.74131 | -2.64226 | -1.41445 |
| C | -0.47884 | 0.20303  | 0.63019  |
| O | -0.19473 | 1.31565  | 1.08789  |
| C | 0.60751  | -0.87248 | 0.43613  |
| C | 1.83570  | -0.63362 | 1.35506  |
| H | 1.55610  | 0.07415  | 2.14048  |
| H | 2.10439  | -1.57975 | 1.84034  |
| C | 4.25428  | 1.69452  | -0.36652 |
| C | 2.89683  | 1.20057  | 0.12003  |
| N | 3.04902  | -0.12461 | 0.71809  |
| C | 3.64093  | -1.05330 | -0.24076 |
| C | 4.98098  | -0.50385 | -0.72006 |
| O | 4.82912  | 0.78674  | -1.30499 |
| H | 4.93161  | 1.81943  | 0.49342  |
| H | 4.15655  | 2.65412  | -0.88218 |
| H | 2.19401  | 1.19594  | -0.73403 |
| H | 2.49044  | 1.88552  | 0.86963  |
| H | 3.79309  | -2.02323 | 0.24776  |
| H | 2.99448  | -1.22101 | -1.12353 |
| H | 5.67979  | -0.44915 | 0.12995  |
| H | 5.41165  | -1.14824 | -1.49172 |
| C | -3.19832 | 2.04501  | 0.52521  |
| H | -4.26152 | 2.27270  | 0.66724  |
| H | -2.70218 | 2.22620  | 1.48484  |
| C | -2.60694 | 3.00204  | -0.52234 |
| H | -3.08806 | 2.85936  | -1.49666 |
| H | -2.74530 | 4.04732  | -0.22158 |
| H | -1.53456 | 2.81800  | -0.63652 |
| C | -4.00639 | -0.23952 | -0.35458 |
| C | -5.45541 | -0.02507 | -0.64519 |
| H | -5.67538 | -0.11995 | -1.71646 |
| H | -6.08798 | -0.74938 | -0.11633 |
| H | -5.76099 | 0.97617  | -0.33199 |
| H | 0.92735  | -0.75316 | -0.61136 |

## 4s\_Renantiomer\_conformer-039

|   |          |          |          |
|---|----------|----------|----------|
| C | -3.32517 | 0.48985  | 0.09823  |
| N | -3.39148 | -1.72996 | -0.20231 |
| H | -3.76125 | -2.66098 | -0.34018 |
| C | -2.08041 | -1.43500 | -0.01814 |
| C | -1.98689 | -0.05625 | 0.16834  |
| C | 0.22307  | -1.75378 | 0.76251  |
| C | -0.94116 | -2.39632 | -0.00586 |
| H | -0.02857 | -1.71274 | 1.83015  |
| H | 1.11700  | -2.37835 | 0.67199  |
| H | -1.23110 | -3.35023 | 0.45010  |
| H | -0.62322 | -2.62337 | -1.03483 |
| C | -0.71191 | 0.59473  | 0.38717  |
| O | -0.59311 | 1.80509  | 0.60150  |
| C | 0.52948  | -0.32433 | 0.27189  |
| C | 1.76211  | 0.29988  | 0.94578  |
| H | 1.52327  | 1.33592  | 1.19923  |
| H | 1.97552  | -0.23107 | 1.89437  |
| C | 4.68008  | -0.89258 | -1.13735 |
| C | 3.46245  | -1.00281 | -0.22619 |
| N | 2.94350  | 0.33038  | 0.08130  |
| C | 4.00508  | 1.13995  | 0.68153  |
| C | 5.20614  | 1.20651  | -0.25401 |
| O | 5.70343  | -0.09625 | -0.54814 |
| H | 4.37571  | -0.45677 | -2.10243 |
| H | 5.11565  | -1.87918 | -1.31809 |
| H | 3.74327  | -1.54957 | 0.69585  |
| H | 2.69223  | -1.58745 | -0.73870 |
| H | 3.62274  | 2.15134  | 0.86125  |
| H | 4.33068  | 0.72586  | 1.65607  |
| H | 4.91801  | 1.71640  | -1.18718 |
| H | 6.02818  | 1.75828  | 0.21034  |
| C | -3.70330 | 1.93889  | 0.20616  |
| H | -4.77720 | 2.02560  | 0.41009  |
| H | -3.17972 | 2.38766  | 1.05715  |
| C | -3.35856 | 2.73840  | -1.06071 |
| H | -2.28133 | 2.70019  | -1.24834 |
| H | -3.87620 | 2.32675  | -1.93462 |
| H | -3.65067 | 3.78970  | -0.95311 |
| C | -4.17093 | -0.57259 | -0.13596 |
| C | -5.65206 | -0.64402 | -0.31217 |
| H | -5.92770 | -0.98418 | -1.31875 |
| H | -6.11369 | -1.33540 | 0.40430  |
| H | -6.09995 | 0.34116  | -0.16143 |



|   |         |          |          |
|---|---------|----------|----------|
| H | 0.73356 | -0.36646 | -0.81023 |
|---|---------|----------|----------|

4s\_Renantiomer\_conformer-040

|   |          |          |          |
|---|----------|----------|----------|
| C | 2.77522  | 0.77969  | 0.12276  |
| N | 3.30606  | -1.21113 | -0.75836 |
| H | 3.83567  | -1.93179 | -1.23010 |
| C | 2.10924  | -1.40080 | -0.14869 |
| C | 1.73340  | -0.18059 | 0.41384  |
| C | 0.32785  | -2.56500 | 1.08597  |
| C | 1.34174  | -2.67769 | -0.06810 |
| H | -0.37157 | -3.40748 | 1.05339  |
| H | 0.86885  | -2.62910 | 2.03752  |
| H | 0.81923  | -2.86692 | -1.01649 |
| H | 2.01045  | -3.53182 | 0.09113  |
| C | 0.49521  | -0.04099 | 1.15155  |
| O | 0.19659  | 0.96584  | 1.80459  |
| C | -0.46418 | -1.23903 | 1.04740  |
| C | -1.34706 | -1.16639 | -0.22816 |
| H | -0.78719 | -0.67890 | -1.04926 |
| H | -1.55088 | -2.19136 | -0.55819 |
| C | -4.90938 | -0.17998 | -0.88743 |
| C | -3.53975 | -0.79517 | -1.15022 |
| N | -2.64782 | -0.53347 | -0.01842 |
| C | -2.55471 | 0.91216  | 0.20336  |
| C | -3.94456 | 1.49276  | 0.42913  |
| O | -4.81355 | 1.22399  | -0.66870 |
| H | -5.36662 | -0.66564 | -0.01037 |
| H | -5.56684 | -0.31945 | -1.75020 |
| H | -3.13332 | -0.38010 | -2.09334 |
| H | -3.64564 | -1.87844 | -1.28098 |
| H | -1.92909 | 1.10629  | 1.07691  |
| H | -2.08479 | 1.41822  | -0.66420 |
| H | -4.37195 | 1.07224  | 1.35373  |
| H | -3.89464 | 2.58072  | 0.52832  |
| C | 2.76387  | 2.23492  | 0.49114  |
| H | 2.50853  | 2.33837  | 1.55129  |
| H | 3.76713  | 2.65748  | 0.36075  |
| C | 1.75563  | 3.04631  | -0.33908 |
| H | 0.74218  | 2.66414  | -0.18295 |
| H | 1.77034  | 4.10388  | -0.05049 |
| H | 1.98778  | 2.97936  | -1.40803 |
| C | 3.73138  | 0.11165  | -0.61067 |
| C | 5.02005  | 0.56523  | -1.21344 |
| H | 5.86635  | -0.04118 | -0.86655 |
| H | 5.00176  | 0.50458  | -2.30927 |

|   |          |          |          |
|---|----------|----------|----------|
| H | 5.22081  | 1.60441  | -0.94210 |
| H | -1.13209 | -1.19647 | 1.91358  |

4s\_Renantiomer\_conformer-041

|   |          |          |          |
|---|----------|----------|----------|
| C | -2.40358 | -0.85176 | 0.38948  |
| N | -3.29013 | 0.84220  | -0.77885 |
| H | -3.95463 | 1.38003  | -1.31883 |
| C | -2.10102 | 1.31006  | -0.32228 |
| C | -1.50399 | 0.28086  | 0.40760  |
| C | -0.46313 | 2.94254  | 0.52973  |
| C | -1.54916 | 2.68063  | -0.53175 |
| H | 0.09522  | 3.85014  | 0.27341  |
| H | -0.95257 | 3.12831  | 1.49309  |
| H | -1.12897 | 2.77265  | -1.54288 |
| H | -2.33979 | 3.43686  | -0.45987 |
| C | -0.21860 | 0.46485  | 1.04931  |
| O | 0.29231  | -0.35637 | 1.82103  |
| C | 0.51653  | 1.76050  | 0.69162  |
| C | 1.38660  | 1.61890  | -0.59391 |
| H | 0.73542  | 1.43527  | -1.45532 |
| H | 1.85520  | 2.60112  | -0.75065 |
| C | 3.27008  | -1.58039 | -1.25654 |
| C | 2.02615  | -0.74703 | -0.96800 |
| N | 2.43885  | 0.61540  | -0.63330 |
| C | 3.34840  | 0.62299  | 0.50935  |
| C | 4.55351  | -0.25801 | 0.19443  |
| O | 4.15185  | -1.58612 | -0.13518 |
| H | 3.79141  | -1.17601 | -2.13906 |
| H | 3.00329  | -2.62398 | -1.44745 |
| H | 1.46213  | -1.22928 | -0.15656 |
| H | 1.38633  | -0.71845 | -1.85773 |
| H | 3.68574  | 1.65083  | 0.69190  |
| H | 2.85956  | 0.25667  | 1.42736  |
| H | 5.11951  | 0.17852  | -0.64418 |
| H | 5.21338  | -0.33985 | 1.06302  |
| C | -2.16128 | -2.19362 | 1.01883  |
| H | -1.71443 | -2.05044 | 2.00760  |
| H | -3.11770 | -2.70893 | 1.16899  |
| C | -1.23248 | -3.08687 | 0.18062  |
| H | -0.25598 | -2.61001 | 0.05114  |
| H | -1.65677 | -3.26579 | -0.81390 |
| H | -1.07604 | -4.05714 | 0.66646  |
| C | -3.49659 | -0.47386 | -0.35978 |
| C | -4.73681 | -1.20985 | -0.74657 |
| H | -5.64206 | -0.66195 | -0.45555 |

|   |          |          |          |
|---|----------|----------|----------|
| H | -4.79095 | -1.37895 | -1.82982 |
| H | -4.76521 | -2.18658 | -0.25737 |
| H | 1.18573  | 1.97414  | 1.53160  |

4s\_Renantiomer\_conformer-042

|   |          |          |          |
|---|----------|----------|----------|
| C | 2.27061  | -0.98753 | -0.37486 |
| N | 3.23466  | 0.57134  | 0.91315  |
| H | 3.90048  | 1.01751  | 1.52937  |
| C | 2.15720  | 1.18498  | 0.35751  |
| C | 1.52353  | 0.24614  | -0.45536 |
| C | 0.70688  | 3.00241  | -0.49930 |
| C | 1.73495  | 2.59997  | 0.57823  |
| H | 0.19540  | 3.92249  | -0.19496 |
| H | 1.24024  | 3.22655  | -1.43042 |
| H | 1.30103  | 2.70929  | 1.58198  |
| H | 2.59614  | 3.27820  | 0.54664  |
| C | 0.33969  | 0.59002  | -1.21630 |
| O | -0.12714 | -0.10030 | -2.12747 |
| C | -0.33368 | 1.89967  | -0.79098 |
| C | -1.22601 | 1.64325  | 0.44342  |
| H | -0.59048 | 1.54301  | 1.32899  |
| H | -1.86375 | 2.53459  | 0.60542  |
| C | -3.75851 | -0.88019 | -0.75609 |
| C | -3.01547 | 0.44955  | -0.70899 |
| N | -2.01256 | 0.41811  | 0.35630  |
| C | -2.64756 | 0.09907  | 1.63390  |
| C | -3.38848 | -1.22822 | 1.52642  |
| O | -4.36920 | -1.18936 | 0.49410  |
| H | -3.05385 | -1.67981 | -1.03508 |
| H | -4.56287 | -0.84565 | -1.49617 |
| H | -3.74104 | 1.27188  | -0.55388 |
| H | -2.51400 | 0.60445  | -1.66689 |
| H | -1.87481 | 0.02559  | 2.40797  |
| H | -3.36116 | 0.88750  | 1.94378  |
| H | -2.66571 | -2.03561 | 1.32647  |
| H | -3.91971 | -1.45154 | 2.45590  |
| C | 1.88673  | -2.28320 | -1.02826 |
| H | 1.67445  | -2.10585 | -2.08803 |
| H | 2.72463  | -2.98889 | -0.98185 |
| C | 0.64512  | -2.91525 | -0.37544 |
| H | 0.83808  | -3.14994 | 0.67775  |
| H | -0.20151 | -2.22297 | -0.41966 |
| H | 0.35984  | -3.84252 | -0.88622 |
| C | 3.32080  | -0.75610 | 0.48696  |
| C | 4.41407  | -1.64427 | 0.98282  |

|   |          |          |          |
|---|----------|----------|----------|
| H | 5.40611  | -1.22671 | 0.76839  |
| H | 4.35313  | -1.80118 | 2.06753  |
| H | 4.35363  | -2.62360 | 0.50186  |
| H | -0.95749 | 2.22243  | -1.63030 |

4s\_Renantiomer\_conformer-043

|   |          |          |          |
|---|----------|----------|----------|
| C | -2.26383 | -0.88092 | -0.03848 |
| N | -3.08638 | 0.99495  | -0.94726 |
| H | -3.70745 | 1.61736  | -1.44648 |
| C | -1.95516 | 1.37923  | -0.30348 |
| C | -1.40431 | 0.23778  | 0.28059  |
| C | -0.36503 | 2.83172  | 0.90553  |
| C | -1.40710 | 2.76555  | -0.22861 |
| H | 0.21082  | 3.76074  | 0.82488  |
| H | -0.89217 | 2.86409  | 1.86634  |
| H | -0.94970 | 3.04411  | -1.18808 |
| H | -2.20650 | 3.49470  | -0.05035 |
| C | -0.16819 | 0.30439  | 1.03163  |
| O | 0.28410  | -0.62778 | 1.70812  |
| C | 0.59712  | 1.62423  | 0.91077  |
| C | 1.50662  | 1.66749  | -0.35400 |
| H | 0.87884  | 1.68579  | -1.25114 |
| H | 2.03636  | 2.63012  | -0.31408 |
| C | 3.21473  | -1.47884 | -1.53959 |
| C | 2.01390  | -0.62812 | -1.13930 |
| N | 2.49770  | 0.62117  | -0.55123 |
| C | 3.36813  | 0.36641  | 0.59404  |
| C | 4.52565  | -0.52440 | 0.15405  |
| O | 4.05240  | -1.74321 | -0.41564 |
| H | 3.79256  | -0.95956 | -2.32100 |
| H | 2.89217  | -2.45142 | -1.92252 |
| H | 1.38509  | -1.21087 | -0.44960 |
| H | 1.41653  | -0.39467 | -2.02835 |
| H | 3.76283  | 1.32176  | 0.96178  |
| H | 2.82796  | -0.12041 | 1.42239  |
| H | 5.14600  | 0.01338  | -0.58096 |
| H | 5.14941  | -0.80253 | 1.00853  |
| C | -2.06946 | -2.30449 | 0.39703  |
| H | -2.65955 | -2.96974 | -0.24462 |
| H | -1.01850 | -2.58448 | 0.25984  |
| C | -2.45380 | -2.53765 | 1.86677  |
| H | -1.83128 | -1.91649 | 2.51702  |
| H | -3.50472 | -2.27948 | 2.04062  |
| H | -2.30772 | -3.58713 | 2.14873  |
| C | -3.29515 | -0.37837 | -0.80215 |

|   |          |          |          |
|---|----------|----------|----------|
| C | -4.48316 | -1.03554 | -1.42401 |
| H | -5.42435 | -0.65751 | -1.00423 |
| H | -4.51907 | -0.87013 | -2.50833 |
| H | -4.45341 | -2.11400 | -1.25104 |
| H | 1.23894  | 1.69046  | 1.79546  |

4s\_Renantiomer\_conformer-044

|   |          |          |          |
|---|----------|----------|----------|
| C | 3.24009  | 0.52904  | -0.25373 |
| N | 3.44202  | -1.65204 | 0.22024  |
| H | 3.86679  | -2.55476 | 0.38523  |
| C | 2.10640  | -1.41694 | 0.19057  |
| C | 1.92933  | -0.06357 | -0.09668 |
| C | -0.25970 | -1.88735 | -0.25435 |
| C | 1.01802  | -2.41057 | 0.41797  |
| H | -0.14222 | -1.94907 | -1.34482 |
| H | -1.11947 | -2.50648 | 0.01397  |
| H | 1.29296  | -3.39622 | 0.02421  |
| H | 0.84261  | -2.54128 | 1.49667  |
| C | 0.60763  | 0.52207  | -0.19067 |
| O | 0.40268  | 1.70951  | -0.46766 |
| C | -0.56257 | -0.42871 | 0.12759  |
| C | -1.86248 | 0.07531  | -0.51460 |
| H | -1.96678 | 1.14708  | -0.30114 |
| H | -1.76671 | -0.01465 | -1.60311 |
| C | -4.35332 | 0.90511  | 1.24762  |
| C | -3.53220 | -0.38650 | 1.23269  |
| N | -3.02344 | -0.72449 | -0.10439 |
| C | -4.13431 | -0.69852 | -1.06301 |
| C | -4.93919 | 0.60135  | -1.01210 |
| O | -5.42866 | 0.83564  | 0.30960  |
| H | -3.71673 | 1.77441  | 1.01778  |
| H | -4.80801 | 1.06618  | 2.22987  |
| H | -4.17370 | -1.21156 | 1.56874  |
| H | -2.69738 | -0.31110 | 1.93689  |
| H | -3.74386 | -0.86815 | -2.07229 |
| H | -4.80901 | -1.53035 | -0.81902 |
| H | -4.32039 | 1.45331  | -1.33791 |
| H | -5.81768 | 0.54611  | -1.66251 |
| C | 3.53701  | 1.97318  | -0.53843 |
| H | 4.56805  | 2.07367  | -0.89810 |
| H | 2.88272  | 2.32504  | -1.34341 |
| C | 3.33491  | 2.87647  | 0.68880  |
| H | 2.29519  | 2.82629  | 1.02552  |
| H | 3.98185  | 2.56188  | 1.51565  |
| H | 3.56778  | 3.92094  | 0.44992  |

|   |          |          |          |
|---|----------|----------|----------|
| C | 4.15487  | -0.48097 | -0.04820 |
| C | 5.64798  | -0.49001 | -0.07042 |
| H | 6.06933  | -0.74081 | 0.91166  |
| H | 6.03973  | -1.22019 | -0.79007 |
| H | 6.02912  | 0.49438  | -0.35261 |
| H | -0.67125 | -0.38647 | 1.22423  |

4s\_Renantiomer\_conformer-045

|   |          |          |          |
|---|----------|----------|----------|
| C | 2.40353  | 0.85177  | 0.38955  |
| N | 3.29018  | -0.84216 | -0.77874 |
| H | 3.95475  | -1.37998 | -1.31865 |
| C | 2.10103  | -1.31004 | -0.32230 |
| C | 1.50394  | -0.28086 | 0.40756  |
| C | 0.46318  | -2.94259 | 0.52964  |
| C | 1.54918  | -2.68059 | -0.53185 |
| H | -0.09512 | -3.85021 | 0.27330  |
| H | 0.95265  | -3.12835 | 1.49298  |
| H | 1.12896  | -2.77254 | -1.54298 |
| H | 2.33981  | -3.43683 | -0.46006 |
| C | 0.21851  | -0.46488 | 1.04918  |
| O | -0.29252 | 0.35636  | 1.82081  |
| C | -0.51653 | -1.76060 | 0.69156  |
| C | -1.38671 | -1.61904 | -0.59390 |
| H | -0.73563 | -1.43548 | -1.45539 |
| H | -1.85536 | -2.60126 | -0.75053 |
| C | -3.27020 | 1.58021  | -1.25674 |
| C | -2.02623 | 0.74685  | -0.96833 |
| N | -2.43891 | -0.61549 | -0.63321 |
| C | -3.34821 | -0.62280 | 0.50963  |
| C | -4.55335 | 0.25820  | 0.19482  |
| O | -4.15170 | 1.58622  | -0.13517 |
| H | -3.79176 | 1.17568  | -2.13905 |
| H | -3.00340 | 2.62375  | -1.44793 |
| H | -1.46199 | 1.22926  | -0.15714 |
| H | -1.38666 | 0.71804  | -1.85822 |
| H | -3.68556 | -1.65058 | 0.69247  |
| H | -2.85914 | -0.25631 | 1.42746  |
| H | -5.11959 | -0.17847 | -0.64355 |
| H | -5.21300 | 0.34026  | 1.06356  |
| C | 2.16112  | 2.19363  | 1.01885  |
| H | 1.71394  | 2.05047  | 2.00747  |
| H | 3.11752  | 2.70887  | 1.16932  |
| C | 1.23263  | 3.08696  | 0.18036  |
| H | 1.65720  | 3.26576  | -0.81406 |
| H | 0.25611  | 2.61023  | 0.05067  |

|   |          |          |          |
|---|----------|----------|----------|
| H | 1.07622  | 4.05728  | 0.66611  |
| C | 3.49661  | 0.47388  | -0.35960 |
| C | 4.73687  | 1.20987  | -0.74629 |
| H | 4.79101  | 1.37920  | -1.82950 |
| H | 4.76533  | 2.18650  | -0.25689 |
| H | 5.64208  | 0.66185  | -0.45539 |
| H | -1.18566 | -1.97424 | 1.53160  |

4s\_Renantiomer\_conformer-046

|   |          |          |          |
|---|----------|----------|----------|
| C | 2.55409  | 0.69800  | 0.20559  |
| N | 3.00450  | -1.12028 | -1.02464 |
| H | 3.49052  | -1.74976 | -1.64923 |
| C | 1.86337  | -1.41903 | -0.35503 |
| C | 1.53909  | -0.30901 | 0.42583  |
| C | 0.18878  | -2.78717 | 0.81866  |
| C | 1.10018  | -2.69929 | -0.41976 |
| H | -0.51454 | -3.61960 | 0.70747  |
| H | 0.80883  | -3.00141 | 1.69729  |
| H | 0.49815  | -2.73561 | -1.33872 |
| H | 1.77612  | -3.56149 | -0.46009 |
| C | 0.36652  | -0.30140 | 1.27481  |
| O | 0.11825  | 0.59508  | 2.09020  |
| C | -0.59841 | -1.48180 | 1.06690  |
| C | -1.58516 | -1.20178 | -0.09954 |
| H | -1.08951 | -0.55743 | -0.84494 |
| H | -1.79156 | -2.14925 | -0.61038 |
| C | -3.68305 | 0.45621  | -1.73093 |
| C | -3.88336 | -0.68973 | -0.73508 |
| N | -2.88804 | -0.69500 | 0.34664  |
| C | -2.86071 | 0.63973  | 0.96736  |
| C | -2.66852 | 1.76236  | -0.05175 |
| O | -3.68083 | 1.71742  | -1.06118 |
| H | -4.50309 | 0.49101  | -2.45493 |
| H | -2.74059 | 0.32799  | -2.28729 |
| H | -3.85949 | -1.65372 | -1.25626 |
| H | -4.87469 | -0.57887 | -0.27596 |
| H | -3.82799 | 0.78788  | 1.46557  |
| H | -2.07556 | 0.67806  | 1.72463  |
| H | -1.67321 | 1.69792  | -0.52088 |
| H | -2.75303 | 2.74280  | 0.42708  |
| C | 2.57917  | 2.07517  | 0.80265  |
| H | 2.41028  | 2.00525  | 1.88264  |
| H | 3.57090  | 2.52086  | 0.66184  |
| C | 1.51217  | 3.00205  | 0.19731  |
| H | 1.65210  | 3.10364  | -0.88484 |

|   |          |          |          |
|---|----------|----------|----------|
| H | 0.51219  | 2.59624  | 0.37808  |
| H | 1.56049  | 4.00172  | 0.64483  |
| C | 3.44350  | 0.16675  | -0.70272 |
| C | 4.67818  | 0.72555  | -1.32957 |
| H | 5.54946  | 0.08173  | -1.15463 |
| H | 4.56865  | 0.83959  | -2.41576 |
| H | 4.90238  | 1.71076  | -0.91370 |
| H | -1.18637 | -1.59094 | 1.98356  |

4s\_Renantiomer\_conformer-047

|   |          |          |          |
|---|----------|----------|----------|
| C | 2.49792  | -0.65554 | 0.27174  |
| N | 2.82699  | 1.44397  | 0.98278  |
| H | 3.25192  | 2.23605  | 1.44599  |
| C | 1.72086  | 1.50422  | 0.20038  |
| C | 1.47468  | 0.21311  | -0.26877 |
| C | 0.07141  | 2.43321  | -1.36825 |
| C | 0.91449  | 2.71977  | -0.11210 |
| H | -0.66022 | 3.23438  | -1.51951 |
| H | 0.73349  | 2.42915  | -2.24231 |
| H | 0.26220  | 2.97146  | 0.73611  |
| H | 1.55948  | 3.59157  | -0.27365 |
| C | 0.33604  | -0.07819 | -1.11363 |
| O | 0.13592  | -1.18197 | -1.63571 |
| C | -0.66427 | 1.07816  | -1.29023 |
| C | -1.71832 | 1.08165  | -0.14886 |
| H | -1.27124 | 0.64189  | 0.75854  |
| H | -1.95130 | 2.12208  | 0.10516  |
| C | -3.90667 | -0.17514 | 1.70594  |
| C | -4.04930 | 0.70336  | 0.45975  |
| N | -2.99397 | 0.46820  | -0.53609 |
| C | -2.93116 | -0.97410 | -0.82472 |
| C | -2.79952 | -1.82507 | 0.43774  |
| O | -3.86714 | -1.55772 | 1.35143  |
| H | -4.76673 | -0.04993 | 2.37114  |
| H | -2.99754 | 0.09179  | 2.26850  |
| H | -4.05434 | 1.76285  | 0.74084  |
| H | -5.01298 | 0.47557  | -0.01487 |
| H | -3.86649 | -1.24712 | -1.33109 |
| H | -2.09980 | -1.17842 | -1.50211 |
| H | -2.85912 | -2.89106 | 0.19733  |
| H | -1.83142 | -1.64095 | 0.93103  |
| C | 2.64361  | -2.12692 | 0.01191  |
| H | 3.27646  | -2.57761 | 0.78571  |
| H | 1.66078  | -2.60554 | 0.08617  |
| C | 3.23534  | -2.43019 | -1.37383 |



|   |          |          |          |
|---|----------|----------|----------|
| H | 3.33179  | -3.51093 | -1.53159 |
| H | 2.58451  | -2.02583 | -2.15458 |
| H | 4.22805  | -1.97841 | -1.48141 |
| C | 3.31919  | 0.13773  | 1.04272  |
| C | 4.53934  | -0.17807 | 1.84342  |
| H | 5.42606  | 0.34101  | 1.45724  |
| H | 4.42255  | 0.11244  | 2.89522  |
| H | 4.74464  | -1.25085 | 1.81369  |
| H | -1.19388 | 0.91082  | -2.23331 |

4s\_Renantiomer\_conformer-048

|   |          |          |          |
|---|----------|----------|----------|
| C | -3.25482 | -0.40964 | 0.18165  |
| N | -3.13935 | 1.66649  | -0.65393 |
| H | -3.42419 | 2.53658  | -1.08320 |
| C | -1.89908 | 1.41024  | -0.16908 |
| C | -1.91950 | 0.11902  | 0.35957  |
| C | 0.26817  | 1.88756  | 0.89542  |
| C | -0.72869 | 2.33305  | -0.18988 |
| H | 1.20083  | 2.44847  | 0.78282  |
| H | -0.14685 | 2.14884  | 1.87633  |
| H | -0.24986 | 2.31776  | -1.17899 |
| H | -1.04030 | 3.36973  | -0.01603 |
| C | -0.73882 | -0.46913 | 0.95104  |
| O | -0.70070 | -1.59949 | 1.44964  |
| C | 0.54866  | 0.37053  | 0.87324  |
| C | 1.36627  | -0.10250 | -0.35987 |
| H | 0.96087  | -1.05207 | -0.72455 |
| H | 1.25589  | 0.62492  | -1.18655 |
| C | 4.95589  | 0.52912  | 0.63482  |
| C | 3.50040  | 0.86591  | 0.32925  |
| N | 2.77628  | -0.34646 | -0.05542 |
| C | 3.44724  | -0.97737 | -1.19434 |
| C | 4.90059  | -1.27581 | -0.84728 |
| O | 5.59575  | -0.08839 | -0.47742 |
| H | 4.99965  | -0.13870 | 1.50992  |
| H | 5.52099  | 1.43849  | 0.85691  |
| H | 3.46066  | 1.63172  | -0.47045 |
| H | 3.04602  | 1.29533  | 1.22681  |
| H | 2.92919  | -1.91173 | -1.43943 |
| H | 3.41712  | -0.33029 | -2.09269 |
| H | 4.94027  | -2.00529 | -0.02276 |
| H | 5.42610  | -1.69103 | -1.71164 |
| C | -3.72650 | -1.78082 | 0.57052  |
| H | -3.38855 | -2.00420 | 1.58836  |
| H | -4.82267 | -1.80355 | 0.58594  |

|   |          |          |          |
|---|----------|----------|----------|
| C | -3.20549 | -2.87766 | -0.37198 |
| H | -2.11190 | -2.89911 | -0.35342 |
| H | -3.57331 | -3.86448 | -0.06696 |
| H | -3.53126 | -2.69400 | -1.40217 |
| C | -3.98448 | 0.57200  | -0.45208 |
| C | -5.40619 | 0.61767  | -0.90642 |
| H | -5.92775 | -0.29635 | -0.61246 |
| H | -5.94580 | 1.46724  | -0.46886 |
| H | -5.48311 | 0.70847  | -1.99759 |
| H | 1.12705  | 0.09309  | 1.76080  |

#### 4s\_Renantiomer\_conformer-049

|   |          |          |          |
|---|----------|----------|----------|
| C | -3.36560 | -0.27058 | -0.22832 |
| N | -3.11760 | 1.89603  | 0.28913  |
| H | -3.34913 | 2.86104  | 0.48283  |
| C | -1.85839 | 1.39480  | 0.24083  |
| C | -1.96046 | 0.04119  | -0.07410 |
| C | 0.55291  | 1.39388  | -0.22639 |
| C | -0.58947 | 2.13343  | 0.48829  |
| H | 0.45291  | 1.53819  | -1.31019 |
| H | 1.50433  | 1.84068  | 0.07040  |
| H | -0.65737 | 3.17020  | 0.13845  |
| H | -0.38107 | 2.17961  | 1.56785  |
| C | -0.78767 | -0.80075 | -0.18032 |
| O | -0.84265 | -2.01183 | -0.42530 |
| C | 0.57386  | -0.11507 | 0.07758  |
| C | 1.68072  | -0.88819 | -0.67810 |
| H | 1.51618  | -1.95047 | -0.47373 |
| H | 1.53838  | -0.74904 | -1.75703 |
| C | 4.95591  | -0.65877 | 1.16494  |
| C | 3.43529  | -0.62664 | 1.03244  |
| N | 3.07603  | -0.58591 | -0.37773 |
| C | 3.69100  | 0.55116  | -1.05240 |
| C | 5.20458  | 0.46406  | -0.87987 |
| O | 5.55718  | 0.45136  | 0.50253  |
| H | 5.33921  | -1.59957 | 0.73891  |
| H | 5.25739  | -0.59507 | 2.21444  |
| H | 3.04744  | 0.24474  | 1.59384  |
| H | 3.01033  | -1.52967 | 1.48671  |
| H | 3.43492  | 0.51861  | -2.11734 |
| H | 3.36087  | 1.52767  | -0.65676 |
| H | 5.58111  | -0.44745 | -1.37058 |
| H | 5.69853  | 1.33599  | -1.31828 |
| C | -3.95286 | -1.61720 | -0.53872 |
| H | -4.98082 | -1.49640 | -0.90105 |

|   |          |          |          |
|---|----------|----------|----------|
| H | -3.38209 | -2.08306 | -1.34938 |
| C | -3.94701 | -2.56278 | 0.67311  |
| H | -4.52042 | -2.13593 | 1.50392  |
| H | -4.38771 | -3.53328 | 0.41579  |
| H | -2.92047 | -2.73125 | 1.01139  |
| C | -4.05490 | 0.89981  | 0.00444  |
| C | -5.51504 | 1.21283  | -0.00623 |
| H | -5.87515 | 1.51566  | 0.98551  |
| H | -5.75131 | 2.02758  | -0.70251 |
| H | -6.08885 | 0.33488  | -0.31263 |
| H | 0.75043  | -0.23786 | 1.15879  |

#### 4s\_Renantiomer\_conformer-050

|   |          |          |          |
|---|----------|----------|----------|
| C | -2.41543 | 0.81806  | -0.41212 |
| N | -3.25984 | -0.77851 | 0.91578  |
| H | -3.88602 | -1.25639 | 1.54970  |
| C | -2.11476 | -1.30270 | 0.41088  |
| C | -1.55104 | -0.34082 | -0.42495 |
| C | -0.04370 | -2.60623 | 0.48540  |
| C | -1.57269 | -2.67376 | 0.63002  |
| H | 0.35920  | -2.09409 | 1.36314  |
| H | 0.37565  | -3.61827 | 0.49676  |
| H | -1.84795 | -3.05921 | 1.61832  |
| H | -1.99387 | -3.37148 | -0.10893 |
| C | -0.36173 | -0.62850 | -1.19914 |
| O | 0.01607  | 0.05426  | -2.15494 |
| C | 0.42101  | -1.89875 | -0.80891 |
| C | 1.94522  | -1.63254 | -0.82777 |
| H | 2.44077  | -2.47356 | -0.30380 |
| H | 2.29110  | -1.65933 | -1.86527 |
| C | 4.25807  | 1.19855  | 0.01229  |
| C | 3.82512  | -0.19206 | -0.43453 |
| N | 2.37837  | -0.34201 | -0.29097 |
| C | 1.98000  | -0.06881 | 1.08759  |
| C | 2.46628  | 1.31583  | 1.50340  |
| O | 3.87699  | 1.44666  | 1.36251  |
| H | 3.80513  | 1.95449  | -0.64882 |
| H | 5.34633  | 1.29743  | -0.03043 |
| H | 4.37456  | -0.94932 | 0.15962  |
| H | 4.09592  | -0.33747 | -1.48683 |
| H | 0.88943  | -0.07910 | 1.16177  |
| H | 2.37961  | -0.82453 | 1.79275  |
| H | 1.95729  | 2.07805  | 0.89192  |
| H | 2.23730  | 1.49981  | 2.55678  |
| C | -2.15935 | 2.11315  | -1.12650 |

|   |          |          |          |
|---|----------|----------|----------|
| H | -1.97691 | 1.91199  | -2.18804 |
| H | -3.05002 | 2.74981  | -1.06970 |
| C | -0.94905 | 2.87312  | -0.55811 |
| H | -0.03997 | 2.27393  | -0.66724 |
| H | -0.79764 | 3.82143  | -1.08695 |
| H | -1.09088 | 3.09324  | 0.50613  |
| C | -3.45917 | 0.51950  | 0.43717  |
| C | -4.63860 | 1.31862  | 0.88460  |
| H | -5.58380 | 0.80557  | 0.66579  |
| H | -4.61447 | 1.51269  | 1.96475  |
| H | -4.65803 | 2.28455  | 0.37427  |
| H | 0.23187  | -2.59999 | -1.63585 |

4s\_Renantiomer\_conformer-051

|   |          |          |          |
|---|----------|----------|----------|
| C | 2.45649  | -0.78270 | 0.11691  |
| N | 3.11256  | 1.20063  | 0.92917  |
| H | 3.66336  | 1.89501  | 1.41576  |
| C | 1.95787  | 1.45213  | 0.26298  |
| C | 1.51004  | 0.24208  | -0.26496 |
| C | -0.20570 | 2.53757  | -0.10676 |
| C | 1.30244  | 2.77576  | 0.06545  |
| H | -0.62121 | 2.25665  | 0.86452  |
| H | -0.69817 | 3.47138  | -0.39935 |
| H | 1.49257  | 3.44591  | 0.91153  |
| H | 1.71096  | 3.27172  | -0.82777 |
| C | 0.32207  | 0.17608  | -1.09171 |
| O | 0.00565  | -0.81142 | -1.76063 |
| C | -0.53054 | 1.45992  | -1.16602 |
| C | -2.04009 | 1.14214  | -1.25973 |
| H | -2.58973 | 2.08826  | -1.08520 |
| H | -2.26761 | 0.83101  | -2.28383 |
| C | -4.47443 | -1.30315 | 0.20890  |
| C | -3.97276 | -0.11449 | -0.60134 |
| N | -2.53840 | 0.07360  | -0.39322 |
| C | -2.25380 | 0.23046  | 1.02991  |
| C | -2.80065 | -0.96694 | 1.80053  |
| O | -4.20008 | -1.13213 | 1.59655  |
| H | -3.99604 | -2.22612 | -0.15574 |
| H | -5.55901 | -1.40584 | 0.11341  |
| H | -4.54778 | 0.78789  | -0.31172 |
| H | -4.15770 | -0.29552 | -1.66674 |
| H | -1.17188 | 0.26669  | 1.18484  |
| H | -2.69040 | 1.16165  | 1.44275  |
| H | -2.26647 | -1.87634 | 1.48180  |
| H | -2.65390 | -0.82950 | 2.87541  |

|   |          |          |          |
|---|----------|----------|----------|
| C | 2.39073  | -2.23754 | -0.24900 |
| H | 2.98129  | -2.82561 | 0.46396  |
| H | 1.35466  | -2.58386 | -0.16506 |
| C | 2.88870  | -2.51459 | -1.67652 |
| H | 3.93003  | -2.19409 | -1.79566 |
| H | 2.83039  | -3.58387 | -1.91251 |
| H | 2.27284  | -1.96858 | -2.39686 |
| C | 3.43391  | -0.15704 | 0.86071  |
| C | 4.65596  | -0.68470 | 1.53736  |
| H | 5.57356  | -0.25264 | 1.11760  |
| H | 4.65362  | -0.46517 | 2.61270  |
| H | 4.71610  | -1.76920 | 1.41762  |
| H | -0.26444 | 1.89895  | -2.14071 |

4s\_Renantiomer\_conformer-052

|   |          |          |          |
|---|----------|----------|----------|
| C | -3.28714 | 0.41631  | -0.22959 |
| N | -3.27288 | -1.80908 | 0.03358  |
| H | -3.60798 | -2.75652 | 0.14473  |
| C | -1.96769 | -1.44078 | 0.04987  |
| C | -1.92434 | -0.05646 | -0.11153 |
| C | 0.40168  | -1.49426 | 0.68206  |
| C | -0.78837 | -2.33931 | 0.20467  |
| H | 0.23505  | -1.19232 | 1.72412  |
| H | 1.31317  | -2.10039 | 0.67091  |
| H | -0.99826 | -3.15243 | 0.90964  |
| H | -0.54190 | -2.81336 | -0.75756 |
| C | -0.66740 | 0.66017  | -0.17695 |
| O | -0.58788 | 1.88802  | -0.28123 |
| C | 0.60186  | -0.22706 | -0.17393 |
| C | 1.85533  | 0.57505  | 0.21536  |
| H | 1.58485  | 1.63353  | 0.24644  |
| H | 2.15734  | 0.29065  | 1.23793  |
| C | 4.94106  | 1.05032  | 0.60559  |
| C | 4.01736  | 1.42343  | -0.55654 |
| N | 2.93782  | 0.45027  | -0.77112 |
| C | 3.52704  | -0.89222 | -0.87720 |
| C | 4.45347  | -1.23379 | 0.29140  |
| O | 5.48810  | -0.25620 | 0.41662  |
| H | 4.39903  | 1.09230  | 1.56384  |
| H | 5.79194  | 1.73601  | 0.66464  |
| H | 4.61911  | 1.46639  | -1.47442 |
| H | 3.58061  | 2.41488  | -0.39249 |
| H | 2.73358  | -1.63947 | -0.97038 |
| H | 4.11599  | -0.92464 | -1.80329 |
| H | 3.88748  | -1.29960 | 1.23452  |

|   |          |          |          |
|---|----------|----------|----------|
| H | 4.95228  | -2.19371 | 0.12640  |
| C | -3.72564 | 1.84354  | -0.38788 |
| H | -3.10439 | 2.33080  | -1.14731 |
| H | -4.75854 | 1.87297  | -0.75483 |
| C | -3.62519 | 2.64646  | 0.91899  |
| H | -2.58848 | 2.66668  | 1.26778  |
| H | -3.95800 | 3.68059  | 0.77070  |
| H | -4.24545 | 2.19609  | 1.70235  |
| C | -4.09752 | -0.69424 | -0.13442 |
| C | -5.58249 | -0.84766 | -0.17199 |
| H | -5.97724 | -1.22986 | 0.77830  |
| H | -6.05859 | 0.11688  | -0.36396 |
| H | -5.90026 | -1.54152 | -0.96064 |
| H | 0.72014  | -0.53382 | -1.22538 |

4s\_Renantiomer\_conformer-053

|   |          |          |          |
|---|----------|----------|----------|
| C | 3.28969  | 0.41605  | -0.23477 |
| N | 3.27967  | -1.80355 | 0.07383  |
| H | 3.61558  | -2.75211 | 0.17235  |
| C | 1.97278  | -1.44145 | 0.05334  |
| C | 1.92702  | -0.06004 | -0.13089 |
| C | -0.42361 | -1.64138 | -0.42871 |
| C | 0.79415  | -2.34379 | 0.18963  |
| H | -0.30825 | -1.61222 | -1.51989 |
| H | -1.32893 | -2.22109 | -0.22215 |
| H | 0.97604  | -3.31046 | -0.29452 |
| H | 0.59710  | -2.55572 | 1.25151  |
| C | 0.66887  | 0.65498  | -0.19166 |
| O | 0.58482  | 1.86890  | -0.40168 |
| C | -0.59200 | -0.19906 | 0.09059  |
| C | -1.87022 | 0.48634  | -0.42127 |
| H | -1.61029 | 1.50218  | -0.72926 |
| H | -2.22226 | -0.04248 | -1.32355 |
| C | -4.46415 | -1.25908 | 0.07957  |
| C | -3.47777 | -0.65404 | 1.08032  |
| N | -2.89880 | 0.61641  | 0.62056  |
| C | -3.99067 | 1.51983  | 0.23371  |
| C | -4.97406 | 0.88597  | -0.75335 |
| O | -5.50653 | -0.33033 | -0.22506 |
| H | -4.95111 | -2.14508 | 0.49834  |
| H | -3.94887 | -1.55755 | -0.84752 |
| H | -2.67839 | -1.36449 | 1.31032  |
| H | -4.01644 | -0.45488 | 2.01613  |
| H | -4.54265 | 1.78983  | 1.14415  |
| H | -3.56603 | 2.43756  | -0.18830 |

|   |          |          |          |
|---|----------|----------|----------|
| H | -5.82887 | 1.54549  | -0.93219 |
| H | -4.48375 | 0.68922  | -1.72018 |
| C | 3.72517  | 1.84274  | -0.40609 |
| H | 4.76775  | 1.87151  | -0.74460 |
| H | 3.12227  | 2.31311  | -1.19030 |
| C | 3.58524  | 2.66750  | 0.88355  |
| H | 4.18545  | 2.23331  | 1.69125  |
| H | 3.91778  | 3.70043  | 0.72671  |
| H | 2.53957  | 2.68997  | 1.20473  |
| C | 4.10276  | -0.68842 | -0.09978 |
| C | 5.58866  | -0.83680 | -0.11053 |
| H | 5.97130  | -1.18562 | 0.85736  |
| H | 5.91991  | -1.55531 | -0.87108 |
| H | 6.06421  | 0.12258  | -0.32807 |
| H | -0.65458 | -0.23283 | 1.18999  |

4s\_Renantiomer\_conformer-054

|   |          |          |          |
|---|----------|----------|----------|
| C | -3.10918 | 0.44990  | -0.06501 |
| N | -2.92212 | -1.70561 | 0.51791  |
| H | -3.16667 | -2.61955 | 0.87476  |
| C | -1.73728 | -1.39186 | -0.06309 |
| C | -1.80385 | -0.04924 | -0.43984 |
| C | 0.30610  | -1.74094 | -1.39007 |
| C | -0.57533 | -2.30557 | -0.26253 |
| H | 1.25623  | -2.28030 | -1.42351 |
| H | -0.20360 | -1.89783 | -2.34830 |
| H | 0.00751  | -2.38777 | 0.66630  |
| H | -0.90975 | -3.32068 | -0.50676 |
| C | -0.68270 | 0.60747  | -1.07777 |
| O | -0.68076 | 1.78955  | -1.44095 |
| C | 0.59013  | -0.23908 | -1.22186 |
| C | 1.48196  | 0.06663  | 0.00605  |
| H | 1.62422  | 1.15795  | 0.05487  |
| H | 0.94086  | -0.21435 | 0.91605  |
| C | 4.07226  | 0.40021  | 1.79374  |
| C | 3.35024  | -0.85866 | 1.31013  |
| N | 2.73299  | -0.69220 | -0.01128 |
| C | 3.73518  | -0.17658 | -0.95486 |
| C | 4.45433  | 1.06864  | -0.43129 |
| O | 5.05288  | 0.81282  | 0.84047  |
| H | 4.60889  | 0.21090  | 2.72855  |
| H | 3.35275  | 1.21700  | 1.96720  |
| H | 2.58321  | -1.16229 | 2.03091  |
| H | 4.08493  | -1.67186 | 1.23781  |
| H | 4.47956  | -0.96615 | -1.12021 |

|   |          |          |          |
|---|----------|----------|----------|
| H | 3.26029  | 0.03566  | -1.91766 |
| H | 5.26655  | 1.36090  | -1.10375 |
| H | 3.75578  | 1.91662  | -0.34865 |
| C | -3.60833 | 1.85449  | -0.24427 |
| H | -3.37387 | 2.19586  | -1.25858 |
| H | -4.70028 | 1.87386  | -0.14612 |
| C | -2.98748 | 2.83714  | 0.76175  |
| H | -3.21236 | 2.53524  | 1.79103  |
| H | -1.90075 | 2.86293  | 0.63872  |
| H | -3.37446 | 3.85171  | 0.60979  |
| C | -3.77612 | -0.59985 | 0.52801  |
| C | -5.14368 | -0.70326 | 1.11879  |
| H | -5.10833 | -0.91760 | 2.19476  |
| H | -5.68640 | 0.23572  | 0.98577  |
| H | -5.73178 | -1.50017 | 0.64596  |
| H | 1.09701  | 0.13321  | -2.11895 |

#### 4s\_Renantiomer\_conformer-055

|   |          |          |          |
|---|----------|----------|----------|
| C | 3.24856  | 0.20086  | 0.05745  |
| N | 2.64844  | -1.95743 | 0.00371  |
| H | 2.71702  | -2.96203 | -0.08887 |
| C | 1.52636  | -1.28622 | 0.36564  |
| C | 1.85091  | 0.07106  | 0.40735  |
| C | -0.60115 | -0.87269 | 1.51650  |
| C | 0.19271  | -1.88155 | 0.66991  |
| H | -1.63311 | -1.21009 | 1.63957  |
| H | -0.15912 | -0.84080 | 2.52019  |
| H | -0.34569 | -2.10921 | -0.26106 |
| H | 0.29762  | -2.83268 | 1.20487  |
| C | 0.86050  | 1.07272  | 0.74436  |
| O | 1.09102  | 2.28643  | 0.80667  |
| C | -0.56983 | 0.55168  | 0.93422  |
| C | -1.27860 | 0.72736  | -0.44466 |
| H | -1.14760 | 1.78248  | -0.71853 |
| H | -0.75497 | 0.13635  | -1.20470 |
| C | -5.00706 | 0.89736  | 0.04485  |
| C | -3.54661 | 1.02275  | 0.47016  |
| N | -2.69609 | 0.41297  | -0.54359 |
| C | -3.06337 | -0.97638 | -0.79488 |
| C | -4.53367 | -1.03239 | -1.19964 |
| O | -5.36212 | -0.46368 | -0.18783 |
| H | -5.17371 | 1.48795  | -0.86988 |
| H | -5.67382 | 1.26322  | 0.83076  |
| H | -3.42324 | 0.55350  | 1.46378  |
| H | -3.28429 | 2.08270  | 0.56881  |



|   |          |          |          |
|---|----------|----------|----------|
| H | -2.44314 | -1.36874 | -1.60853 |
| H | -2.92417 | -1.63199 | 0.08230  |
| H | -4.67628 | -0.49091 | -2.14817 |
| H | -4.86275 | -2.06763 | -1.32662 |
| C | 4.01696  | 1.48481  | -0.06523 |
| H | 3.80443  | 2.11821  | 0.80291  |
| H | 5.09306  | 1.27448  | -0.05121 |
| C | 3.66515  | 2.26618  | -1.34145 |
| H | 2.60243  | 2.52567  | -1.34082 |
| H | 4.24518  | 3.19441  | -1.40599 |
| H | 3.87521  | 1.66800  | -2.23543 |
| C | 3.71228  | -1.07290 | -0.18982 |
| C | 5.05604  | -1.57990 | -0.59871 |
| H | 5.77510  | -0.75817 | -0.63889 |
| H | 5.44045  | -2.32766 | 0.10662  |
| H | 5.03089  | -2.04886 | -1.59082 |
| H | -1.05223 | 1.23456  | 1.64188  |

4s\_Renantiomer\_conformer-056

|   |          |          |          |
|---|----------|----------|----------|
| C | 2.87556  | 0.73249  | -0.28424 |
| N | 3.64481  | -1.32224 | 0.17366  |
| H | 4.29239  | -2.08253 | 0.33241  |
| C | 2.29440  | -1.44514 | 0.15028  |
| C | 1.76700  | -0.18442 | -0.12662 |
| C | 0.12067  | -2.51396 | -0.26305 |
| C | 1.50623  | -2.68958 | 0.37726  |
| H | 0.21846  | -2.55722 | -1.35580 |
| H | -0.53151 | -3.34135 | 0.03600  |
| H | 2.01890  | -3.56574 | -0.03677 |
| H | 1.39149  | -2.87322 | 1.45632  |
| C | 0.33899  | 0.03325  | -0.22028 |
| O | -0.16394 | 1.12268  | -0.52054 |
| C | -0.54636 | -1.17939 | 0.13026  |
| C | -1.97094 | -1.06305 | -0.44670 |
| H | -1.95965 | -0.35692 | -1.28927 |
| H | -2.26512 | -2.03653 | -0.85416 |
| C | -3.39576 | 1.69869  | 0.18440  |
| C | -2.85744 | 0.62661  | 1.13174  |
| N | -2.96829 | -0.73425 | 0.58296  |
| C | -4.34910 | -0.95361 | 0.13356  |
| C | -4.86010 | 0.14306  | -0.80394 |
| O | -4.75112 | 1.42458  | -0.18483 |
| H | -2.76360 | 1.76077  | -0.71252 |
| H | -3.40210 | 2.67939  | 0.67085  |
| H | -3.43890 | 0.65587  | 2.06311  |

|   |          |          |          |
|---|----------|----------|----------|
| H | -1.81463 | 0.84147  | 1.37464  |
| H | -4.41997 | -1.93368 | -0.35206 |
| H | -4.99292 | -0.97104 | 1.02348  |
| H | -4.29774 | 0.13631  | -1.75176 |
| H | -5.92031 | -0.00214 | -1.03463 |
| C | 2.78061  | 2.20578  | -0.55747 |
| H | 3.75343  | 2.58100  | -0.89671 |
| H | 2.07058  | 2.37771  | -1.37380 |
| C | 2.32323  | 3.01041  | 0.66987  |
| H | 1.32901  | 2.68151  | 0.98645  |
| H | 3.01654  | 2.87218  | 1.50732  |
| H | 2.27268  | 4.08130  | 0.44006  |
| C | 4.02410  | -0.00316 | -0.08800 |
| C | 5.46722  | 0.37997  | -0.11278 |
| H | 5.57613  | 1.43093  | -0.39103 |
| H | 5.94236  | 0.24423  | 0.86735  |
| H | 6.03440  | -0.21895 | -0.83669 |
| H | -0.63499 | -1.17362 | 1.22811  |

4s\_Renantiomer\_conformer-057

|   |          |          |          |
|---|----------|----------|----------|
| C | -2.67539 | 0.69078  | -0.21801 |
| N | -3.11199 | -1.22156 | 0.86393  |
| H | -3.60331 | -1.91103 | 1.41661  |
| C | -1.92462 | -1.42996 | 0.23770  |
| C | -1.60932 | -0.25738 | -0.44828 |
| C | -0.08824 | -2.65531 | -0.87887 |
| C | -1.11925 | -2.68666 | 0.26740  |
| H | 0.66384  | -3.43655 | -0.72094 |
| H | -0.59981 | -2.88943 | -1.81970 |
| H | -0.61201 | -2.78750 | 1.23700  |
| H | -1.76341 | -3.56877 | 0.16981  |
| C | -0.40578 | -0.15650 | -1.24924 |
| O | -0.17531 | 0.75857  | -2.04545 |
| C | 0.60804  | -1.28586 | -1.03197 |
| C | 1.48682  | -0.98299 | 0.20135  |
| H | 0.89059  | -1.13160 | 1.10750  |
| H | 2.28964  | -1.74049 | 0.22852  |
| C | 4.01257  | 0.17489  | 1.67721  |
| C | 2.59390  | 0.73459  | 1.54110  |
| N | 1.96676  | 0.39894  | 0.25673  |
| C | 2.87122  | 0.79113  | -0.83378 |
| C | 4.27953  | 0.22194  | -0.66501 |
| O | 4.83490  | 0.61134  | 0.59390  |
| H | 3.99503  | -0.92638 | 1.71159  |
| H | 4.48921  | 0.53695  | 2.59343  |

|   |          |          |          |
|---|----------|----------|----------|
| H | 2.64535  | 1.82906  | 1.61364  |
| H | 1.96073  | 0.37216  | 2.35891  |
| H | 2.43637  | 0.50160  | -1.79254 |
| H | 2.93889  | 1.88689  | -0.82464 |
| H | 4.27053  | -0.87734 | -0.74323 |
| H | 4.95405  | 0.61183  | -1.43350 |
| C | -2.71491 | 2.10602  | -0.71705 |
| H | -2.47297 | 2.11924  | -1.78504 |
| H | -3.72874 | 2.51022  | -0.61170 |
| C | -1.72104 | 3.01622  | 0.02383  |
| H | -0.70071 | 2.63884  | -0.09355 |
| H | -1.75602 | 4.03932  | -0.36876 |
| H | -1.95071 | 3.05220  | 1.09490  |
| C | -3.58712 | 0.06590  | 0.60511  |
| C | -4.87298 | 0.53564  | 1.20168  |
| H | -5.11735 | 1.53582  | 0.83563  |
| H | -5.70749 | -0.12868 | 0.94349  |
| H | -4.82165 | 0.58534  | 2.29706  |
| H | 1.23924  | -1.31736 | -1.92576 |

4s\_Renantiomer\_conformer-058

|   |          |          |          |
|---|----------|----------|----------|
| C | -3.15230 | 0.25350  | -0.04126 |
| N | -2.70924 | -1.86492 | 0.54004  |
| H | -2.84401 | -2.80221 | 0.89477  |
| C | -1.57123 | -1.41186 | -0.04237 |
| C | -1.79733 | -0.08705 | -0.41792 |
| C | 0.50070  | -1.50267 | -1.36869 |
| C | -0.31354 | -2.18380 | -0.25363 |
| H | 1.49525  | -1.95629 | -1.41754 |
| H | 0.01149  | -1.70478 | -2.32909 |
| H | 0.26988  | -2.22523 | 0.67691  |
| H | -0.52981 | -3.22383 | -0.52504 |
| C | -0.76813 | 0.69794  | -1.06245 |
| O | -0.92103 | 1.86257  | -1.44676 |
| C | 0.61045  | 0.02679  | -1.19155 |
| C | 1.47414  | 0.46268  | 0.02421  |
| H | 1.00284  | 1.32147  | 0.51368  |
| H | 1.48086  | -0.34763 | 0.77134  |
| C | 4.21701  | -1.11906 | 0.02493  |
| C | 3.67019  | -0.10778 | -0.98409 |
| N | 2.81553  | 0.91547  | -0.36542 |
| C | 3.54877  | 1.52638  | 0.75279  |
| C | 4.10628  | 0.49630  | 1.73873  |
| O | 4.93500  | -0.45293 | 1.06521  |
| H | 4.92575  | -1.80271 | -0.45214 |

|   |          |          |          |
|---|----------|----------|----------|
| H | 3.40206  | -1.71988 | 0.46027  |
| H | 3.12578  | -0.61373 | -1.78545 |
| H | 4.52084  | 0.41010  | -1.44584 |
| H | 4.38996  | 2.09282  | 0.33187  |
| H | 2.89200  | 2.23356  | 1.27180  |
| H | 4.73736  | 0.97862  | 2.49138  |
| H | 3.28924  | -0.02688 | 2.26073  |
| C | -3.81543 | 1.58821  | -0.22234 |
| H | -3.63460 | 1.94609  | -1.24189 |
| H | -4.90072 | 1.47922  | -0.11022 |
| C | -3.30297 | 2.64638  | 0.76798  |
| H | -3.47476 | 2.32819  | 1.80258  |
| H | -2.22933 | 2.80286  | 0.62760  |
| H | -3.81208 | 3.60538  | 0.61544  |
| C | -3.68802 | -0.86775 | 0.55344  |
| C | -5.03074 | -1.13137 | 1.15112  |
| H | -5.52062 | -1.99549 | 0.68457  |
| H | -4.96515 | -1.33476 | 2.22776  |
| H | -5.68256 | -0.26485 | 1.01661  |
| H | 1.06749  | 0.46783  | -2.08344 |

4s\_Renantiomer\_conformer-059

|   |          |          |          |
|---|----------|----------|----------|
| C | -3.08214 | 0.19365  | 0.40947  |
| N | -2.62228 | -1.98466 | 0.15440  |
| H | -2.73749 | -2.98918 | 0.16488  |
| C | -1.52293 | -1.33472 | -0.30183 |
| C | -1.76242 | 0.03289  | -0.16243 |
| C | 0.46802  | -0.90948 | -1.68422 |
| C | -0.28419 | -1.95960 | -0.84690 |
| H | 1.45447  | -1.30026 | -1.95199 |
| H | -0.07885 | -0.75646 | -2.62233 |
| H | 0.35124  | -2.32491 | -0.02783 |
| H | -0.52236 | -2.83505 | -1.46255 |
| C | -0.76070 | 1.01191  | -0.52153 |
| O | -0.91997 | 2.23425  | -0.43149 |
| C | 0.60105  | 0.45275  | -0.97063 |
| C | 1.54894  | 0.43175  | 0.25999  |
| H | 1.11547  | 1.03825  | 1.06204  |
| H | 1.60840  | -0.59617 | 0.65340  |
| C | 4.28090  | -0.97619 | -0.49150 |
| C | 3.66806  | 0.31891  | -1.02714 |
| N | 2.86012  | 1.02862  | -0.02507 |
| C | 3.67022  | 1.21022  | 1.18821  |
| C | 4.29177  | -0.09384 | 1.69500  |
| O | 5.07010  | -0.71567 | 0.67079  |

|   |          |          |          |
|---|----------|----------|----------|
| H | 4.95379  | -1.42413 | -1.22894 |
| H | 3.49637  | -1.71239 | -0.25227 |
| H | 3.06834  | 0.12473  | -1.92013 |
| H | 4.48576  | 0.98836  | -1.32403 |
| H | 4.48170  | 1.90960  | 0.94733  |
| H | 3.05249  | 1.66664  | 1.96979  |
| H | 4.97417  | 0.09738  | 2.52878  |
| H | 3.51127  | -0.78894 | 2.04325  |
| C | -3.76926 | 1.49503  | 0.70585  |
| H | -4.61027 | 1.32145  | 1.38767  |
| H | -3.07142 | 2.16191  | 1.22419  |
| C | -4.27537 | 2.20272  | -0.56129 |
| H | -3.43537 | 2.42763  | -1.22501 |
| H | -4.98661 | 1.56984  | -1.10420 |
| H | -4.77701 | 3.14487  | -0.31057 |
| C | -3.58793 | -1.07463 | 0.59245  |
| C | -4.89532 | -1.55633 | 1.12967  |
| H | -5.49848 | -0.71239 | 1.47292  |
| H | -5.47622 | -2.09241 | 0.36805  |
| H | -4.75979 | -2.23917 | 1.97800  |
| H | 1.00230  | 1.19427  | -1.66921 |

4s\_Renantiomer\_conformer-060

|   |          |          |          |
|---|----------|----------|----------|
| C | 3.37957  | 0.28628  | 0.26492  |
| N | 3.16307  | -1.90057 | -0.17445 |
| H | 3.41097  | -2.86176 | -0.36713 |
| C | 1.89524  | -1.42007 | -0.12843 |
| C | 1.97862  | -0.05486 | 0.14413  |
| C | -0.47951 | -1.21706 | -0.71669 |
| C | 0.63649  | -2.19588 | -0.32263 |
| H | -0.29943 | -0.85620 | -1.73820 |
| H | -1.44902 | -1.72192 | -0.72292 |
| H | 0.76369  | -2.97303 | -1.08561 |
| H | 0.36196  | -2.71338 | 0.60922  |
| C | 0.78957  | 0.75813  | 0.29916  |
| O | 0.81293  | 1.97594  | 0.50994  |
| C | -0.54596 | -0.00621 | 0.23078  |
| C | -1.69253 | 0.94710  | -0.12748 |
| H | -1.69227 | 1.78939  | 0.58546  |
| H | -1.49934 | 1.37067  | -1.12079 |
| C | -4.92418 | -0.42872 | 1.18723  |
| C | -3.39815 | -0.24200 | 1.14056  |
| N | -2.98624 | 0.27493  | -0.17228 |
| C | -4.03602 | 1.10378  | -0.75102 |
| C | -5.25518 | 0.21785  | -1.05210 |

|   |          |          |          |
|---|----------|----------|----------|
| O | -5.42253 | -0.82152 | -0.08318 |
| H | -5.41794 | 0.49578  | 1.52221  |
| H | -5.19186 | -1.22048 | 1.89156  |
| H | -2.89573 | -1.20010 | 1.31686  |
| H | -3.10242 | 0.44028  | 1.96004  |
| H | -4.31491 | 1.94849  | -0.09287 |
| H | -3.67315 | 1.54212  | -1.68619 |
| H | -6.16391 | 0.83726  | -1.10517 |
| H | -5.12604 | -0.28986 | -2.01300 |
| C | 3.94362  | 1.65331  | 0.52422  |
| H | 3.38539  | 2.12608  | 1.33987  |
| H | 4.98414  | 1.56577  | 0.85903  |
| C | 3.87890  | 2.56766  | -0.70965 |
| H | 2.83889  | 2.70316  | -1.02075 |
| H | 4.30313  | 3.55450  | -0.48959 |
| H | 4.43753  | 2.13376  | -1.54683 |
| C | 4.08643  | -0.87891 | 0.06059  |
| C | 5.55245  | -1.16273 | 0.04612  |
| H | 5.82310  | -1.94466 | 0.76700  |
| H | 5.89369  | -1.49704 | -0.94222 |
| H | 6.11548  | -0.26229 | 0.30324  |
| H | -0.70914 | -0.38846 | 1.25160  |

4s\_Renantiomer\_conformer-061

|   |          |          |          |
|---|----------|----------|----------|
| C | 3.10921  | 0.44982  | 0.06513  |
| N | 2.92204  | -1.70566 | -0.51789 |
| H | 3.16655  | -2.61960 | -0.87476 |
| C | 1.73718  | -1.39184 | 0.06303  |
| C | 1.80381  | -0.04924 | 0.43984  |
| C | -0.30629 | -1.74085 | 1.38989  |
| C | 0.57515  | -2.30548 | 0.26234  |
| H | -1.25644 | -2.28017 | 1.42326  |
| H | 0.20338  | -1.89779 | 2.34812  |
| H | -0.00766 | -2.38756 | -0.66652 |
| H | 0.90948  | -3.32063 | 0.50652  |
| C | 0.68264  | 0.60753  | 1.07769  |
| O | 0.68073  | 1.78961  | 1.44088  |
| C | -0.59024 | -0.23898 | 1.22170  |
| C | -1.48197 | 0.06678  | -0.00627 |
| H | -1.62439 | 1.15807  | -0.05497 |
| H | -0.94072 | -0.21401 | -0.91625 |
| C | -4.07240 | 0.40100  | -1.79353 |
| C | -3.35020 | -0.85807 | -1.31068 |
| N | -2.73287 | -0.69228 | 0.01078  |
| C | -3.73511 | -0.17735 | 0.95470  |

|   |          |          |          |
|---|----------|----------|----------|
| C | -4.45444 | 1.06809  | 0.43191  |
| O | -5.05302 | 0.81294  | -0.83998 |
| H | -4.60905 | 0.21217  | -2.72842 |
| H | -3.35300 | 1.21798  | -1.96656 |
| H | -2.58320 | -1.16120 | -2.03169 |
| H | -4.08481 | -1.67138 | -1.23875 |
| H | -4.47937 | -0.96712 | 1.11958  |
| H | -3.26023 | 0.03436  | 1.91763  |
| H | -5.26666 | 1.35985  | 1.10458  |
| H | -3.75601 | 1.91620  | 0.34973  |
| C | 3.60848  | 1.85435  | 0.24453  |
| H | 3.37371  | 2.19578  | 1.25874  |
| H | 4.70047  | 1.87359  | 0.14676  |
| C | 2.98813  | 2.83700  | -0.76178 |
| H | 3.21353  | 2.53510  | -1.79096 |
| H | 1.90133  | 2.86279  | -0.63932 |
| H | 3.37501  | 3.85157  | -0.60962 |
| C | 3.77612  | -0.59995 | -0.52789 |
| C | 5.14372  | -0.70341 | -1.11855 |
| H | 5.73162  | -1.50060 | -0.64595 |
| H | 5.10844  | -0.91736 | -2.19460 |
| H | 5.68658  | 0.23543  | -0.98513 |
| H | -1.09714 | 0.13333  | 2.11876  |

4s\_Renantiomer\_conformer-062

|   |          |          |          |
|---|----------|----------|----------|
| C | 3.38007  | 0.31376  | -0.20682 |
| N | 3.17032  | -1.89950 | 0.07507  |
| H | 3.41933  | -2.87578 | 0.16056  |
| C | 1.90125  | -1.42051 | 0.06568  |
| C | 1.98050  | -0.03827 | -0.10231 |
| C | -0.50498 | -1.40615 | -0.41794 |
| C | 0.64519  | -2.21198 | 0.20392  |
| H | -0.38649 | -1.39227 | -1.50968 |
| H | -1.46558 | -1.88336 | -0.20728 |
| H | 0.74030  | -3.19330 | -0.27576 |
| H | 0.43099  | -2.40174 | 1.26673  |
| C | 0.79038  | 0.78642  | -0.14785 |
| O | 0.80916  | 2.00903  | -0.32956 |
| C | -0.53841 | 0.04476  | 0.09350  |
| C | -1.71052 | 0.83810  | -0.49728 |
| H | -1.68306 | 1.86659  | -0.09840 |
| H | -1.57053 | 0.91381  | -1.58269 |
| C | -5.30894 | -0.12151 | -0.95606 |
| C | -4.08234 | 0.80161  | -1.02215 |
| N | -2.99894 | 0.19765  | -0.25694 |

|   |          |          |          |
|---|----------|----------|----------|
| C | -3.34143 | 0.14119  | 1.17151  |
| C | -4.86215 | -0.00046 | 1.35257  |
| O | -5.42356 | -0.78176 | 0.30809  |
| H | -5.22305 | -0.91878 | -1.70092 |
| H | -6.22282 | 0.45507  | -1.16736 |
| H | -4.33368 | 1.81795  | -0.66389 |
| H | -3.76992 | 0.90606  | -2.06611 |
| H | -2.82668 | -0.71362 | 1.62520  |
| H | -3.00724 | 1.04921  | 1.70837  |
| H | -5.08994 | -0.51393 | 2.29017  |
| H | -5.34192 | 0.98904  | 1.38980  |
| C | 3.94049  | 1.69798  | -0.36234 |
| H | 4.97951  | 1.63912  | -0.70785 |
| H | 3.37672  | 2.23125  | -1.13542 |
| C | 3.88104  | 2.51276  | 0.93974  |
| H | 2.84308  | 2.62038  | 1.26841  |
| H | 4.44630  | 2.01625  | 1.73669  |
| H | 4.30080  | 3.51531  | 0.79528  |
| C | 4.09044  | -0.86127 | -0.08968 |
| C | 5.55677  | -1.14310 | -0.11101 |
| H | 5.82015  | -1.87004 | -0.88991 |
| H | 6.11650  | -0.22558 | -0.30793 |
| H | 5.90865  | -1.54830 | 0.84653  |
| H | -0.65007 | 0.01151  | 1.18958  |

#### 4s\_Renantiomer\_conformer-063

|   |          |          |          |
|---|----------|----------|----------|
| C | -2.61561 | 0.59548  | 0.36297  |
| N | -2.92314 | -1.61299 | 0.58015  |
| H | -3.35019 | -2.49385 | 0.83303  |
| C | -1.77782 | -1.48236 | -0.13777 |
| C | -1.54416 | -0.11624 | -0.29714 |
| C | 0.01649  | -2.04063 | -1.74368 |
| C | -0.93616 | -2.59613 | -0.66638 |
| H | 0.79584  | -2.77864 | -1.96462 |
| H | -0.54982 | -1.88600 | -2.66944 |
| H | -0.36473 | -3.06029 | 0.14944  |
| H | -1.56023 | -3.39222 | -1.08997 |
| C | -0.38464 | 0.36746  | -1.01946 |
| O | -0.21602 | 1.54333  | -1.35737 |
| C | 0.66844  | -0.70036 | -1.34136 |
| C | 1.61960  | -0.90265 | -0.14200 |
| H | 1.08407  | -1.43650 | 0.64994  |
| H | 2.43049  | -1.57371 | -0.47609 |
| C | 4.33220  | 0.65921  | -0.58758 |
| C | 2.91042  | 1.19331  | -0.41623 |



|   |          |          |          |
|---|----------|----------|----------|
| N | 2.08724  | 0.34720  | 0.45956  |
| C | 2.80048  | 0.13657  | 1.72562  |
| C | 4.22991  | -0.37549 | 1.52838  |
| O | 4.97104  | 0.50500  | 0.68241  |
| H | 4.94771  | 1.36055  | -1.15933 |
| H | 4.32733  | -0.30530 | -1.12077 |
| H | 2.41257  | 1.31692  | -1.38004 |
| H | 2.96929  | 2.18605  | 0.04927  |
| H | 2.84785  | 1.10082  | 2.24908  |
| H | 2.22961  | -0.55875 | 2.35160  |
| H | 4.76633  | -0.41388 | 2.48153  |
| H | 4.22388  | -1.38938 | 1.09693  |
| C | -2.78519 | 2.08590  | 0.42617  |
| H | -3.45394 | 2.34703  | 1.25518  |
| H | -1.81628 | 2.55011  | 0.64230  |
| C | -3.33442 | 2.67887  | -0.88115 |
| H | -2.64520 | 2.46597  | -1.70336 |
| H | -4.31166 | 2.24696  | -1.12558 |
| H | -3.45085 | 3.76626  | -0.80106 |
| C | -3.45134 | -0.36053 | 0.89883  |
| C | -4.71558 | -0.24567 | 1.68519  |
| H | -4.94124 | 0.80412  | 1.88790  |
| H | -5.57186 | -0.67130 | 1.14604  |
| H | -4.64482 | -0.76593 | 2.64884  |
| H | 1.24124  | -0.32557 | -2.19565 |

4s\_Renantiomer\_conformer-064

|   |          |          |          |
|---|----------|----------|----------|
| C | 3.02535  | 0.32035  | -0.46312 |
| N | 2.79258  | -1.87111 | -0.05778 |
| H | 3.00395  | -2.85905 | -0.01709 |
| C | 1.65920  | -1.30025 | 0.42136  |
| C | 1.75808  | 0.07292  | 0.19004  |
| C | -0.29879 | -0.98391 | 1.87973  |
| C | 0.51084  | -2.00487 | 1.06168  |
| H | -1.24635 | -1.42861 | 2.19448  |
| H | 0.26750  | -0.72650 | 2.78288  |
| H | -0.12820 | -2.46502 | 0.29418  |
| H | 0.85863  | -2.82333 | 1.70314  |
| C | 0.68021  | 0.97289  | 0.54158  |
| O | 0.70731  | 2.19644  | 0.36525  |
| C | -0.58770 | 0.30630  | 1.09427  |
| C | -1.54362 | 0.07851  | -0.10167 |
| H | -1.68375 | 1.04639  | -0.60881 |
| H | -1.05411 | -0.58081 | -0.82656 |
| C | -4.22492 | -0.31254 | -1.73568 |

|   |          |          |          |
|---|----------|----------|----------|
| C | -3.48406 | -1.26334 | -0.79383 |
| N | -2.79557 | -0.56511 | 0.29844  |
| C | -3.74254 | 0.33199  | 0.97595  |
| C | -4.48303 | 1.25320  | 0.00384  |
| O | -5.15058 | 0.49481  | -1.00628 |
| H | -4.81228 | -0.86828 | -2.47313 |
| H | -3.51190 | 0.33150  | -2.27578 |
| H | -2.75845 | -1.86675 | -1.35009 |
| H | -4.21790 | -1.94698 | -0.34615 |
| H | -4.48069 | -0.29012 | 1.49841  |
| H | -3.21493 | 0.92227  | 1.73144  |
| H | -5.25639 | 1.82699  | 0.52348  |
| H | -3.78603 | 1.96500  | -0.46671 |
| C | 3.56621  | 1.65920  | -0.87403 |
| H | 4.38852  | 1.52217  | -1.58631 |
| H | 2.78322  | 2.22039  | -1.39621 |
| C | 4.05662  | 2.49506  | 0.31896  |
| H | 4.85111  | 1.97102  | 0.86242  |
| H | 4.45037  | 3.46234  | -0.01495 |
| H | 3.22963  | 2.68185  | 1.01028  |
| C | 3.64263  | -0.90383 | -0.59980 |
| C | 4.96257  | -1.29353 | -1.17920 |
| H | 4.85219  | -2.03333 | -1.98227 |
| H | 5.46624  | -0.41888 | -1.59779 |
| H | 5.62737  | -1.72949 | -0.42228 |
| H | -1.04287 | 1.04179  | 1.76670  |

4s\_Renantiomer\_conformer-065

|   |          |          |          |
|---|----------|----------|----------|
| C | 2.56003  | 0.40955  | 0.11838  |
| N | 2.29657  | -1.21593 | -1.40098 |
| H | 2.46103  | -1.79404 | -2.21410 |
| C | 1.31962  | -1.42821 | -0.48431 |
| C | 1.44123  | -0.43240 | 0.48635  |
| C | -0.27790 | -2.69216 | 0.89694  |
| C | 0.29927  | -2.51353 | -0.51906 |
| H | -1.17043 | -3.32748 | 0.85601  |
| H | 0.46341  | -3.22580 | 1.50466  |
| H | -0.49953 | -2.24299 | -1.21734 |
| H | 0.74147  | -3.45457 | -0.86970 |
| C | 0.51799  | -0.34407 | 1.59349  |
| O | 0.56510  | 0.52983  | 2.46989  |
| C | -0.62113 | -1.37202 | 1.61523  |
| C | -1.93536 | -0.71653 | 1.12341  |
| H | -2.73853 | -1.44767 | 1.26459  |
| H | -2.16011 | 0.12865  | 1.79077  |

|   |          |          |          |
|---|----------|----------|----------|
| C | -4.26474 | 0.31786  | -0.79285 |
| C | -3.11254 | -0.65358 | -1.05183 |
| N | -1.90626 | -0.31903 | -0.28830 |
| C | -1.55530 | 1.08970  | -0.51391 |
| C | -2.73645 | 2.03045  | -0.27114 |
| O | -3.86065 | 1.65902  | -1.07121 |
| H | -4.60436 | 0.23921  | 0.25349  |
| H | -5.11576 | 0.10788  | -1.44840 |
| H | -2.85847 | -0.61223 | -2.11972 |
| H | -3.41413 | -1.68071 | -0.82154 |
| H | -0.71405 | 1.36515  | 0.12521  |
| H | -1.22667 | 1.19613  | -1.55603 |
| H | -3.02235 | 2.02319  | 0.79344  |
| H | -2.48308 | 3.05802  | -0.54965 |
| C | 3.03810  | 1.62814  | 0.85401  |
| H | 3.08979  | 1.40677  | 1.92576  |
| H | 4.05576  | 1.87774  | 0.53061  |
| C | 2.12507  | 2.84775  | 0.64895  |
| H | 1.12562  | 2.63741  | 1.04069  |
| H | 2.51963  | 3.72599  | 1.17377  |
| H | 2.03663  | 3.09546  | -0.41493 |
| C | 3.06633  | -0.10117 | -1.05624 |
| C | 4.20447  | 0.33093  | -1.92087 |
| H | 3.86442  | 0.64537  | -2.91613 |
| H | 4.72623  | 1.17684  | -1.46680 |
| H | 4.93494  | -0.47541 | -2.06528 |
| H | -0.79132 | -1.59327 | 2.67675  |

4s\_Renantiomer\_conformer-066

|   |          |          |          |
|---|----------|----------|----------|
| C | 2.55361  | -0.69784 | -0.20563 |
| N | 3.00375  | 1.12005  | 1.02526  |
| H | 3.48962  | 1.74933  | 1.65019  |
| C | 1.86280  | 1.41903  | 0.35546  |
| C | 1.53870  | 0.30925  | -0.42582 |
| C | 0.18865  | 2.78757  | -0.81840 |
| C | 1.09973  | 2.69936  | 0.42023  |
| H | -0.51462 | 3.62005  | -0.70722 |
| H | 0.80892  | 3.00191  | -1.69683 |
| H | 0.49748  | 2.73559  | 1.33906  |
| H | 1.77576  | 3.56148  | 0.46088  |
| C | 0.36641  | 0.30202  | -1.27521 |
| O | 0.11851  | -0.59399 | -2.09122 |
| C | -0.59861 | 1.48231  | -1.06705 |
| C | -1.58542 | 1.20217  | 0.09928  |
| H | -1.08954 | 0.55840  | 0.84503  |

|   |          |          |          |
|---|----------|----------|----------|
| H | -1.79242 | 2.14974  | 0.60968  |
| C | -3.68228 | -0.45654 | 1.73108  |
| C | -3.88330 | 0.68897  | 0.73488  |
| N | -2.88799 | 0.69453  | -0.34686 |
| C | -2.85993 | -0.64038 | -0.96717 |
| C | -2.66696 | -1.76258 | 0.05227  |
| O | -3.67926 | -1.71796 | 1.06174  |
| H | -4.50232 | -0.49163 | 2.45506  |
| H | -2.73993 | -0.32755 | 2.28743  |
| H | -3.86002 | 1.65314  | 1.25577  |
| H | -4.87456 | 0.57738  | 0.27580  |
| H | -3.82718 | -0.78926 | -1.46519 |
| H | -2.07489 | -0.67846 | -1.72457 |
| H | -1.67167 | -1.69738 | 0.52133  |
| H | -2.75088 | -2.74322 | -0.42626 |
| C | 2.57892  | -2.07479 | -0.80319 |
| H | 2.41030  | -2.00447 | -1.88320 |
| H | 3.57066  | -2.52044 | -0.66233 |
| C | 1.51189  | -3.00203 | -0.19849 |
| H | 0.51190  | -2.59627 | -0.37936 |
| H | 1.56044  | -4.00151 | -0.64638 |
| H | 1.65154  | -3.10404 | 0.88367  |
| C | 3.44280  | -0.16690 | 0.70308  |
| C | 4.67730  | -0.72591 | 1.33007  |
| H | 4.56732  | -0.84074 | 2.41613  |
| H | 4.90188  | -1.71078 | 0.91361  |
| H | 5.54855  | -0.08180 | 1.15599  |
| H | -1.18649 | 1.59168  | -1.98373 |

4s\_Renantiomer\_conformer-067

|   |          |          |          |
|---|----------|----------|----------|
| C | -2.41578 | -0.49789 | -0.28792 |
| N | -2.05797 | 1.41967  | -1.38993 |
| H | -2.15504 | 2.15422  | -2.07790 |
| C | -1.18067 | 1.43819  | -0.35582 |
| C | -1.36814 | 0.25824  | 0.36589  |
| C | 0.27510  | 2.36852  | 1.39628  |
| C | -0.18197 | 2.50543  | -0.06709 |
| H | 1.15532  | 2.99840  | 1.57075  |
| H | -0.52338 | 2.75334  | 2.04279  |
| H | 0.67470  | 2.39640  | -0.74066 |
| H | -0.61128 | 3.50057  | -0.23906 |
| C | -0.53377 | -0.07223 | 1.49730  |
| O | -0.63359 | -1.11875 | 2.15287  |
| C | 0.58549  | 0.92255  | 1.83122  |
| C | 1.93824  | 0.38692  | 1.30048  |

|   |          |          |          |
|---|----------|----------|----------|
| H | 2.71834  | 1.08578  | 1.62111  |
| H | 2.14466  | -0.56706 | 1.80744  |
| C | 4.38850  | -0.19556 | -0.66072 |
| C | 3.20932  | 0.76935  | -0.78904 |
| N | 1.98759  | 0.25877  | -0.16005 |
| C | 1.70264  | -1.09459 | -0.65655 |
| C | 2.91170  | -2.02407 | -0.53798 |
| O | 4.05007  | -1.47275 | -1.20255 |
| H | 4.68151  | -0.30387 | 0.39701  |
| H | 5.25643  | 0.16065  | -1.22454 |
| H | 3.00142  | 0.92155  | -1.85693 |
| H | 3.45878  | 1.74419  | -0.35719 |
| H | 0.85113  | -1.51144 | -0.11393 |
| H | 1.41736  | -1.01698 | -1.71381 |
| H | 3.15513  | -2.20556 | 0.52178  |
| H | 2.71264  | -2.98972 | -1.01294 |
| C | -2.96418 | -1.82281 | 0.15629  |
| H | -3.53356 | -2.27970 | -0.66194 |
| H | -2.13329 | -2.50005 | 0.38356  |
| C | -3.85809 | -1.71069 | 1.40147  |
| H | -4.24706 | -2.69272 | 1.69565  |
| H | -3.28329 | -1.30486 | 2.23915  |
| H | -4.70997 | -1.04753 | 1.21230  |
| C | -2.82370 | 0.25014  | -1.36993 |
| C | -3.86835 | 0.01039  | -2.40964 |
| H | -3.44703 | 0.03160  | -3.42287 |
| H | -4.33325 | -0.96734 | -2.26190 |
| H | -4.66371 | 0.76604  | -2.37085 |
| H | 0.67603  | 0.90552  | 2.92490  |

4s\_Renantiomer\_conformer-068

|   |          |          |          |
|---|----------|----------|----------|
| C | 3.38112  | 0.28833  | 0.26770  |
| N | 3.17180  | -1.89062 | -0.21259 |
| H | 3.42292  | -2.84650 | -0.42640 |
| C | 1.90207  | -1.41756 | -0.14712 |
| C | 1.98089  | -0.05751 | 0.15137  |
| C | -0.47807 | -1.21622 | -0.71408 |
| C | 0.64556  | -2.19590 | -0.34478 |
| H | -0.30790 | -0.83859 | -1.73134 |
| H | -1.44555 | -1.72447 | -0.71912 |
| H | 0.77044  | -2.95943 | -1.12175 |
| H | 0.38098  | -2.73051 | 0.58027  |
| C | 0.78966  | 0.74660  | 0.33225  |
| O | 0.80990  | 1.95892  | 0.57311  |
| C | -0.54450 | -0.02037 | 0.25206  |

|   |          |          |          |
|---|----------|----------|----------|
| C | -1.69090 | 0.93819  | -0.09277 |
| H | -1.69397 | 1.77778  | 0.62235  |
| H | -1.49108 | 1.37291  | -1.08035 |
| C | -4.71154 | -1.08922 | 0.87024  |
| C | -3.52017 | -0.15018 | 1.12265  |
| N | -2.99279 | 0.28207  | -0.16577 |
| C | -3.97286 | 1.13458  | -0.85107 |
| C | -5.40497 | 0.66887  | -0.52863 |
| O | -5.44319 | -0.73301 | -0.30512 |
| H | -5.37777 | -1.09278 | 1.74703  |
| H | -4.35843 | -2.11100 | 0.70021  |
| H | -2.75331 | -0.69927 | 1.67519  |
| H | -3.81463 | 0.70771  | 1.75716  |
| H | -3.87691 | 2.19508  | -0.55004 |
| H | -3.77813 | 1.08285  | -1.92908 |
| H | -5.79625 | 1.20409  | 0.34971  |
| H | -6.07528 | 0.87493  | -1.36698 |
| C | 3.94052  | 1.65308  | 0.54818  |
| H | 3.38693  | 2.10740  | 1.37730  |
| H | 4.98435  | 1.56462  | 0.87227  |
| C | 3.86054  | 2.59022  | -0.66758 |
| H | 4.41442  | 2.17527  | -1.51743 |
| H | 2.81730  | 2.72595  | -0.96761 |
| H | 4.28133  | 3.57504  | -0.43242 |
| C | 4.09202  | -0.86899 | 0.03488  |
| C | 5.55926  | -1.14476 | 0.00254  |
| H | 5.89470  | -1.45362 | -0.99603 |
| H | 6.11969  | -0.24778 | 0.27688  |
| H | 5.83925  | -1.94223 | 0.70251  |
| H | -0.70168 | -0.41974 | 1.26731  |

4s\_Renantiomer\_conformer-069

|   |          |          |          |
|---|----------|----------|----------|
| C | 3.37984  | 0.32737  | -0.19400 |
| N | 3.17211  | -1.89745 | -0.02305 |
| H | 3.42192  | -2.87658 | 0.01289  |
| C | 1.90301  | -1.41918 | 0.00069  |
| C | 1.98099  | -0.03011 | -0.09744 |
| C | -0.50672 | -1.38213 | -0.46464 |
| C | 0.64811  | -2.21719 | 0.10786  |
| H | -0.39665 | -1.31447 | -1.55539 |
| H | -1.46615 | -1.86767 | -0.26947 |
| H | 0.74005  | -3.17306 | -0.42130 |
| H | 0.44180  | -2.46043 | 1.16131  |
| C | 0.79079  | 0.79550  | -0.09054 |
| O | 0.80866  | 2.02636  | -0.20378 |

|   |          |          |          |
|---|----------|----------|----------|
| C | -0.53741 | 0.04175  | 0.11758  |
| C | -1.70974 | 0.86417  | -0.43169 |
| H | -1.68658 | 1.87527  | 0.00821  |
| H | -1.56377 | 0.99263  | -1.51171 |
| C | -4.65756 | -0.78524 | 1.22758  |
| C | -3.46457 | 0.18079  | 1.13737  |
| N | -3.00674 | 0.22043  | -0.24602 |
| C | -4.02860 | 0.84381  | -1.09703 |
| C | -5.43806 | 0.49789  | -0.58156 |
| O | -5.45119 | -0.77959 | 0.03854  |
| H | -5.27861 | -0.53253 | 2.10112  |
| H | -4.30322 | -1.81435 | 1.34147  |
| H | -2.66571 | -0.18950 | 1.78510  |
| H | -3.73532 | 1.18670  | 1.51172  |
| H | -3.92829 | 1.94560  | -1.11976 |
| H | -3.88766 | 0.48258  | -2.12286 |
| H | -5.79017 | 1.26571  | 0.12378  |
| H | -6.15157 | 0.45656  | -1.40851 |
| C | 3.93977  | 1.71756  | -0.28556 |
| H | 4.97559  | 1.67534  | -0.64298 |
| H | 3.36974  | 2.28860  | -1.02642 |
| C | 3.89300  | 2.46759  | 1.05531  |
| H | 4.46442  | 1.93206  | 1.82204  |
| H | 4.31322  | 3.47547  | 0.95636  |
| H | 2.85816  | 2.56039  | 1.39789  |
| C | 4.09100  | -0.85188 | -0.14146 |
| C | 5.55712  | -1.13197 | -0.18748 |
| H | 5.91535  | -1.58600 | 0.74549  |
| H | 5.81506  | -1.81776 | -1.00460 |
| H | 6.11571  | -0.20542 | -0.34049 |
| H | -0.64050 | -0.04656 | 1.21150  |

#### 4s\_Renantiomer\_conformer-070

|   |          |          |          |
|---|----------|----------|----------|
| C | -2.34812 | -0.87553 | -0.19685 |
| N | -3.06720 | 1.10094  | -0.96887 |
| H | -3.64188 | 1.78655  | -1.44005 |
| C | -1.96230 | 1.38746  | -0.23372 |
| C | -1.47637 | 0.17993  | 0.26876  |
| C | -0.42057 | 2.67890  | 1.20112  |
| C | -1.38475 | 2.74372  | 0.00019  |
| H | 0.18338  | 3.59241  | 1.24094  |
| H | -1.01035 | 2.64425  | 2.12446  |
| H | -0.85696 | 3.09199  | -0.89855 |
| H | -2.17530 | 3.47921  | 0.19135  |
| C | -0.29064 | 0.13453  | 1.09922  |

|   |          |          |          |
|---|----------|----------|----------|
| O | 0.09166  | -0.86909 | 1.70992  |
| C | 0.50576  | 1.44490  | 1.16814  |
| C | 1.48891  | 1.53724  | -0.01850 |
| H | 0.92541  | 1.73938  | -0.93560 |
| H | 2.14921  | 2.41141  | 0.15027  |
| C | 3.86895  | -1.33453 | 0.52797  |
| C | 3.14233  | -0.03411 | 0.84865  |
| N | 2.25230  | 0.31882  | -0.25829 |
| C | 3.01638  | 0.41153  | -1.50164 |
| C | 3.73934  | -0.90373 | -1.76639 |
| O | 4.60654  | -1.24234 | -0.68821 |
| H | 3.13242  | -2.15084 | 0.45787  |
| H | 4.59060  | -1.57683 | 1.31308  |
| H | 3.88421  | 0.76576  | 1.04102  |
| H | 2.54706  | -0.18113 | 1.75236  |
| H | 2.32888  | 0.62426  | -2.32871 |
| H | 3.76016  | 1.23173  | -1.46325 |
| H | 2.99816  | -1.70494 | -1.91678 |
| H | 4.36456  | -0.82855 | -2.66052 |
| C | -2.21935 | -2.33749 | 0.11994  |
| H | -2.77338 | -2.92655 | -0.62080 |
| H | -1.16714 | -2.63241 | 0.03769  |
| C | -2.71963 | -2.68766 | 1.53045  |
| H | -3.77524 | -2.41743 | 1.64859  |
| H | -2.61658 | -3.76118 | 1.72862  |
| H | -2.13628 | -2.14237 | 2.27789  |
| C | -3.32206 | -0.27202 | -0.96272 |
| C | -4.49314 | -0.83187 | -1.70105 |
| H | -5.44442 | -0.46045 | -1.29841 |
| H | -4.46576 | -0.57203 | -2.76694 |
| H | -4.50392 | -1.92173 | -1.62275 |
| H | 1.07363  | 1.41501  | 2.10322  |

4s\_Renantiomer\_conformer-071

|   |          |          |          |
|---|----------|----------|----------|
| C | 2.41510  | -0.81809 | -0.41226 |
| N | 3.25970  | 0.77821  | 0.91586  |
| H | 3.88588  | 1.25587  | 1.54992  |
| C | 2.11474  | 1.30263  | 0.41094  |
| C | 1.55092  | 0.34093  | -0.42502 |
| C | 0.04384  | 2.60644  | 0.48553  |
| C | 1.57285  | 2.67375  | 0.63020  |
| H | -0.35916 | 2.09435  | 1.36325  |
| H | -0.37535 | 3.61855  | 0.49693  |
| H | 1.84812  | 3.05908  | 1.61854  |
| H | 1.99414  | 3.37148  | -0.10867 |



|   |          |          |          |
|---|----------|----------|----------|
| C | 0.36169  | 0.62888  | -1.19925 |
| O | -0.01612 | -0.05366 | -2.15519 |
| C | -0.42099 | 1.89909  | -0.80880 |
| C | -1.94519 | 1.63277  | -0.82748 |
| H | -2.44075 | 2.47363  | -0.30327 |
| H | -2.29122 | 1.65972  | -1.86493 |
| C | -4.25756 | -1.19881 | 0.01225  |
| C | -3.82484 | 0.19192  | -0.43443 |
| N | -2.37811 | 0.34208  | -0.29086 |
| C | -1.97974 | 0.06885  | 1.08770  |
| C | -2.46582 | -1.31588 | 1.50344  |
| O | -3.87650 | -1.44695 | 1.36248  |
| H | -3.80444 | -1.95461 | -0.64889 |
| H | -5.34580 | -1.29789 | -0.03054 |
| H | -4.37439 | 0.94902  | 0.15980  |
| H | -4.09568 | 0.33739  | -1.48670 |
| H | -0.88918 | 0.07930  | 1.16192  |
| H | -2.37947 | 0.82449  | 1.79287  |
| H | -1.95667 | -2.07800 | 0.89197  |
| H | -2.23686 | -1.49986 | 2.55683  |
| C | 2.15889  | -2.11306 | -1.12680 |
| H | 1.97649  | -1.91174 | -2.18832 |
| H | 3.04948  | -2.74984 | -1.07008 |
| C | 0.94852  | -2.87294 | -0.55847 |
| H | 0.03948  | -2.27370 | -0.66770 |
| H | 0.79711  | -3.82128 | -1.08726 |
| H | 1.09028  | -3.09298 | 0.50580  |
| C | 3.45883  | -0.51980 | 0.43715  |
| C | 4.63801  | -1.31927 | 0.88463  |
| H | 4.65690  | -2.28542 | 0.37470  |
| H | 5.58339  | -0.80673 | 0.66543  |
| H | 4.61401  | -1.51288 | 1.96486  |
| H | -0.23197 | 2.60040  | -1.63569 |

4s\_Renantiomer\_conformer-072

|   |          |          |          |
|---|----------|----------|----------|
| C | -3.32905 | 0.40700  | -0.33345 |
| N | -3.32788 | -1.78992 | 0.10860  |
| H | -3.66829 | -2.72546 | 0.28511  |
| C | -2.02294 | -1.42088 | 0.13794  |
| C | -1.97196 | -0.05393 | -0.13385 |
| C | 0.32138  | -1.42345 | 0.86542  |
| C | -0.84971 | -2.30258 | 0.40200  |
| H | 0.11272  | -1.04765 | 1.87606  |
| H | 1.24177  | -2.01003 | 0.92670  |
| H | -1.08838 | -3.06552 | 1.15257  |

|   |          |          |          |
|---|----------|----------|----------|
| H | -0.56663 | -2.84245 | -0.51449 |
| C | -0.70988 | 0.65220  | -0.21879 |
| O | -0.61515 | 1.86620  | -0.43165 |
| C | 0.54871  | -0.22374 | -0.07077 |
| C | 1.74718  | 0.63034  | 0.36182  |
| H | 1.85454  | 1.46940  | -0.34662 |
| H | 1.52572  | 1.06577  | 1.34317  |
| C | 4.90280  | -0.97663 | -0.80653 |
| C | 3.40934  | -0.68601 | -0.81845 |
| N | 2.97586  | -0.15300 | 0.48227  |
| C | 4.06513  | 0.57707  | 1.15730  |
| C | 5.04566  | 1.20501  | 0.17195  |
| O | 5.68281  | 0.20993  | -0.63906 |
| H | 5.20816  | -1.42013 | -1.75896 |
| H | 5.13147  | -1.70008 | -0.00914 |
| H | 2.86189  | -1.60824 | -1.04913 |
| H | 3.20016  | 0.02705  | -1.63763 |
| H | 3.63607  | 1.35351  | 1.79734  |
| H | 4.61747  | -0.10915 | 1.81312  |
| H | 4.51992  | 1.92769  | -0.47063 |
| H | 5.84043  | 1.74215  | 0.70090  |
| C | -3.75742 | 1.81791  | -0.61625 |
| H | -3.11845 | 2.24032  | -1.39961 |
| H | -4.78262 | 1.82143  | -1.00524 |
| C | -3.67787 | 2.72283  | 0.62371  |
| H | -2.64779 | 2.76669  | 0.98934  |
| H | -4.00223 | 3.74307  | 0.38681  |
| H | -4.31531 | 2.33903  | 1.42843  |
| C | -4.14459 | -0.69248 | -0.17489 |
| C | -5.62807 | -0.84874 | -0.24685 |
| H | -5.92305 | -1.59821 | -0.99234 |
| H | -6.05238 | -1.16109 | 0.71615  |
| H | -6.09624 | 0.09915  | -0.52293 |
| H | 0.74169  | -0.61925 | -1.08131 |

4s\_Renantiomer\_conformer-073

|   |          |          |          |
|---|----------|----------|----------|
| C | 2.75746  | 0.54786  | 0.21834  |
| N | 3.05679  | -1.30159 | -1.01181 |
| H | 3.48118  | -1.96286 | -1.64820 |
| C | 1.86604  | -1.47885 | -0.38713 |
| C | 1.63456  | -0.34758 | 0.39443  |
| C | -0.45801 | -2.21538 | -0.15144 |
| C | 0.97359  | -2.66935 | -0.47313 |
| H | -1.11960 | -3.08573 | -0.07578 |
| H | -0.83570 | -1.60455 | -0.97687 |

|   |          |          |          |
|---|----------|----------|----------|
| H | 1.02040  | -3.12932 | -1.46725 |
| H | 1.29679  | -3.43856 | 0.24447  |
| C | 0.47425  | -0.24980 | 1.25370  |
| O | 0.30803  | 0.65879  | 2.07548  |
| C | -0.54956 | -1.40151 | 1.15213  |
| C | -1.98919 | -0.92656 | 1.42682  |
| H | -2.59060 | -1.80341 | 1.69074  |
| H | -1.97423 | -0.25579 | 2.30252  |
| C | -2.97698 | 1.76242  | -1.02599 |
| C | -2.01379 | 0.97294  | -0.12209 |
| N | -2.62254 | -0.30495 | 0.26905  |
| C | -4.06602 | -0.16377 | 0.39965  |
| C | -4.65808 | 0.11854  | -0.99202 |
| O | -3.77232 | 0.88597  | -1.81115 |
| H | -2.41924 | 2.39404  | -1.72228 |
| H | -3.62030 | 2.42054  | -0.42227 |
| H | -1.75809 | 1.59213  | 0.75465  |
| H | -1.07605 | 0.76721  | -0.65210 |
| H | -4.48801 | -1.09739 | 0.78487  |
| H | -4.34782 | 0.63091  | 1.11644  |
| H | -4.82175 | -0.81945 | -1.53152 |
| H | -5.62556 | 0.63481  | -0.89032 |
| C | 2.90782  | 1.91016  | 0.83077  |
| H | 2.71886  | 1.84689  | 1.90799  |
| H | 3.93971  | 2.25947  | 0.70697  |
| C | 1.94246  | 2.94095  | 0.22309  |
| H | 0.90636  | 2.62872  | 0.38503  |
| H | 2.07896  | 3.92635  | 0.68401  |
| H | 2.10773  | 3.04145  | -0.85567 |
| C | 3.61698  | -0.06917 | -0.66437 |
| C | 4.91974  | 0.36323  | -1.25248 |
| H | 5.71815  | -0.36216 | -1.05038 |
| H | 4.85573  | 0.48375  | -2.34170 |
| H | 5.22671  | 1.32316  | -0.83042 |
| H | -0.28657 | -2.06736 | 1.99007  |

4s\_Renantiomer\_conformer-074

|   |          |          |          |
|---|----------|----------|----------|
| C | -3.25206 | 0.20325  | -0.03895 |
| N | -2.67566 | -1.96086 | 0.03468  |
| H | -2.75269 | -2.96287 | 0.14646  |
| C | -1.55541 | -1.30950 | -0.36651 |
| C | -1.86559 | 0.05050  | -0.42269 |
| C | 0.55819  | -0.95237 | -1.57642 |
| C | -0.23478 | -1.92503 | -0.68655 |
| H | 1.59279  | -1.29466 | -1.66424 |

|   |          |          |          |
|---|----------|----------|----------|
| H | 0.11859  | -0.95341 | -2.58108 |
| H | 0.32507  | -2.12793 | 0.23766  |
| H | -0.36118 | -2.89098 | -1.18941 |
| C | -0.87342 | 1.03199  | -0.80724 |
| O | -1.09114 | 2.24554  | -0.89846 |
| C | 0.54426  | 0.48754  | -1.03409 |
| C | 1.30508  | 0.62343  | 0.30492  |
| H | 1.28816  | 1.68894  | 0.60344  |
| H | 0.76857  | 0.06647  | 1.08153  |
| C | 5.00091  | 0.64285  | -0.32193 |
| C | 3.52060  | 0.86573  | -0.67413 |
| N | 2.65970  | 0.09785  | 0.23647  |
| C | 3.28747  | -0.05258 | 1.54336  |
| C | 4.54916  | -0.91566 | 1.38594  |
| O | 5.21421  | -0.68275 | 0.14083  |
| H | 5.33357  | 1.36998  | 0.43382  |
| H | 5.62888  | 0.77463  | -1.20667 |
| H | 3.32397  | 0.54269  | -1.70265 |
| H | 3.30490  | 1.94955  | -0.62273 |
| H | 3.53125  | 0.92151  | 2.00727  |
| H | 2.59117  | -0.55781 | 2.22018  |
| H | 5.23712  | -0.72838 | 2.22481  |
| H | 4.28304  | -1.97726 | 1.38674  |
| C | -4.00179 | 1.49837  | 0.08174  |
| H | -3.80897 | 2.11235  | -0.80478 |
| H | -5.08009 | 1.30064  | 0.10465  |
| C | -3.60248 | 2.30025  | 1.33109  |
| H | -3.79117 | 1.72170  | 2.24259  |
| H | -2.53761 | 2.54825  | 1.29335  |
| H | -4.17055 | 3.23586  | 1.39525  |
| C | -3.72413 | -1.06060 | 0.24079  |
| C | -5.06334 | -1.54516 | 0.68986  |
| H | -5.76962 | -0.71309 | 0.74209  |
| H | -5.47702 | -2.29328 | 0.00161  |
| H | -5.01807 | -2.00619 | 1.68498  |
| H | 1.01108  | 1.15402  | -1.76710 |

4s\_Renantiomer\_conformer-075

|   |          |          |          |
|---|----------|----------|----------|
| C | 3.19104  | 0.08051  | -0.37882 |
| N | 2.58901  | -1.97628 | 0.27561  |
| H | 2.64412  | -2.96630 | 0.47378  |
| C | 1.50736  | -1.19567 | 0.52174  |
| C | 1.83566  | 0.10265  | 0.12730  |
| C | -0.52355 | -0.40761 | 1.66536  |
| C | 0.20303  | -1.63766 | 1.09510  |

|   |          |          |          |
|---|----------|----------|----------|
| H | -1.55316 | -0.67319 | 1.91925  |
| H | -0.02038 | -0.09574 | 2.58845  |
| H | -0.41461 | -2.11100 | 0.31848  |
| H | 0.35113  | -2.39380 | 1.87512  |
| C | 0.87257  | 1.18006  | 0.21411  |
| O | 1.10157  | 2.34919  | -0.11630 |
| C | -0.53293 | 0.77762  | 0.68415  |
| C | -1.37893 | 0.49371  | -0.57815 |
| H | -1.37670 | 1.40475  | -1.20633 |
| H | -0.89803 | -0.29830 | -1.16352 |
| C | -4.69550 | -1.22597 | -0.90211 |
| C | -3.44342 | -0.49210 | -1.40752 |
| N | -2.72878 | 0.05394  | -0.26047 |
| C | -3.52301 | 1.09604  | 0.40504  |
| C | -5.02459 | 0.80928  | 0.23749  |
| O | -5.27325 | -0.58895 | 0.24119  |
| H | -4.43499 | -2.23839 | -0.57818 |
| H | -5.43802 | -1.29947 | -1.71166 |
| H | -3.71344 | 0.28735  | -2.14443 |
| H | -2.79630 | -1.20570 | -1.92733 |
| H | -3.25858 | 1.11661  | 1.46832  |
| H | -3.30709 | 2.09968  | -0.00721 |
| H | -5.59072 | 1.23420  | 1.07020  |
| H | -5.40510 | 1.26300  | -0.68981 |
| C | 3.96999  | 1.26051  | -0.88336 |
| H | 4.83653  | 0.91257  | -1.45812 |
| H | 3.34389  | 1.83976  | -1.57107 |
| C | 4.44474  | 2.18728  | 0.24724  |
| H | 3.58384  | 2.58065  | 0.79572  |
| H | 5.08645  | 1.64616  | 0.95193  |
| H | 5.01362  | 3.03493  | -0.15281 |
| C | 3.62973  | -1.22115 | -0.27105 |
| C | 4.93388  | -1.86267 | -0.61391 |
| H | 4.80683  | -2.69050 | -1.32314 |
| H | 5.60704  | -1.13275 | -1.06992 |
| H | 5.43516  | -2.26762 | 0.27473  |
| H | -0.94608 | 1.65860  | 1.18681  |

#### 4s\_Renantiomer\_conformer-076

|   |          |          |          |
|---|----------|----------|----------|
| C | 2.70365  | -0.50956 | 0.32689  |
| N | 2.89174  | 1.69535  | 0.68128  |
| H | 3.25752  | 2.57891  | 1.00975  |
| C | 1.74009  | 1.54479  | -0.01891 |
| C | 1.58009  | 0.18193  | -0.26780 |
| C | -0.58182 | 2.01861  | -0.64298 |

|   |          |          |          |
|---|----------|----------|----------|
| C | 0.81896  | 2.62477  | -0.47244 |
| H | -0.99885 | 1.79208  | 0.34287  |
| H | -1.25283 | 2.74973  | -1.10768 |
| H | 0.79836  | 3.45483  | 0.24346  |
| H | 1.16778  | 3.04307  | -1.42875 |
| C | 0.45913  | -0.31866 | -1.03444 |
| O | 0.33777  | -1.50121 | -1.37458 |
| C | -0.57612 | 0.73323  | -1.49041 |
| C | -1.99057 | 0.14332  | -1.64235 |
| H | -2.56387 | 0.80664  | -2.29927 |
| H | -1.90996 | -0.83554 | -2.14461 |
| C | -4.84698 | 0.16947  | 0.78709  |
| C | -4.14934 | -0.15661 | -0.54473 |
| N | -2.71829 | 0.05657  | -0.38132 |
| C | -2.15505 | -0.91845 | 0.56093  |
| C | -3.19450 | -1.27059 | 1.63956  |
| O | -4.03559 | -0.16024 | 1.91740  |
| H | -5.81190 | -0.35833 | 0.84442  |
| H | -5.03593 | 1.24481  | 0.86218  |
| H | -4.52933 | 0.51539  | -1.32071 |
| H | -4.38749 | -1.18636 | -0.87285 |
| H | -1.83686 | -1.84509 | 0.05358  |
| H | -1.26017 | -0.48327 | 1.02219  |
| H | -3.79856 | -2.13543 | 1.32555  |
| H | -2.70010 | -1.53623 | 2.57751  |
| C | 2.96435  | -1.98767 | 0.28579  |
| H | 3.66269  | -2.26200 | 1.08565  |
| H | 2.02962  | -2.52438 | 0.48138  |
| C | 3.52718  | -2.45533 | -1.06595 |
| H | 2.81443  | -2.23058 | -1.86474 |
| H | 4.47235  | -1.94829 | -1.29142 |
| H | 3.71077  | -3.53636 | -1.06225 |
| C | 3.49611  | 0.45628  | 0.90834  |
| C | 4.77716  | 0.36405  | 1.67017  |
| H | 5.59924  | 0.87228  | 1.14976  |
| H | 4.69175  | 0.81658  | 2.66636  |
| H | 5.06521  | -0.68178 | 1.80175  |
| H | -0.24952 | 0.99990  | -2.50902 |

4s\_Renantiomer\_conformer-077

|   |         |          |          |
|---|---------|----------|----------|
| C | 3.35319 | 0.43274  | 0.27229  |
| N | 3.35960 | -1.79533 | 0.03209  |
| H | 3.70366 | -2.74151 | -0.06114 |
| C | 2.05217 | -1.43696 | -0.01351 |
| C | 1.99632 | -0.05088 | 0.13260  |

|   |          |          |          |
|---|----------|----------|----------|
| C | -0.30079 | -1.51938 | -0.70381 |
| C | 0.88135  | -2.34613 | -0.17740 |
| H | -1.22092 | -2.10948 | -0.69297 |
| H | -0.10671 | -1.23969 | -1.74809 |
| H | 1.11476  | -3.17417 | -0.85731 |
| H | 0.61521  | -2.79985 | 0.78945  |
| C | 0.73100  | 0.65391  | 0.17093  |
| O | 0.63229  | 1.88150  | 0.27841  |
| C | -0.52411 | -0.23815 | 0.11813  |
| C | -1.73844 | 0.55463  | -0.37925 |
| H | -1.79850 | 1.51191  | 0.16281  |
| H | -1.57672 | 0.80471  | -1.43511 |
| C | -5.36994 | -0.21862 | -0.84098 |
| C | -3.99816 | 0.32304  | -1.21109 |
| N | -2.98308 | -0.20932 | -0.29446 |
| C | -3.50538 | -0.34456 | 1.08180  |
| C | -4.71867 | 0.54594  | 1.33176  |
| O | -5.79916 | 0.23327  | 0.44833  |
| H | -5.34503 | -1.31885 | -0.86297 |
| H | -6.12043 | 0.11799  | -1.56316 |
| H | -4.04049 | 1.42796  | -1.19551 |
| H | -3.74857 | 0.02764  | -2.23758 |
| H | -3.78545 | -1.38892 | 1.27308  |
| H | -2.72310 | -0.08830 | 1.80300  |
| H | -5.09551 | 0.40638  | 2.35018  |
| H | -4.43404 | 1.60354  | 1.22146  |
| C | 3.77804  | 1.86493  | 0.42325  |
| H | 3.14694  | 2.35267  | 1.17433  |
| H | 4.80784  | 1.90628  | 0.79771  |
| C | 3.68018  | 2.65725  | -0.89026 |
| H | 2.64573  | 2.66627  | -1.24610 |
| H | 4.00351  | 3.69518  | -0.74757 |
| H | 4.30949  | 2.20610  | -1.66593 |
| C | 4.17310  | -0.67277 | 0.20390  |
| C | 5.65815  | -0.81523 | 0.27080  |
| H | 5.96628  | -1.49393 | 1.07633  |
| H | 6.07260  | -1.21021 | -0.66580 |
| H | 6.12442  | 0.15552  | 0.45550  |
| H | -0.70374 | -0.54139 | 1.16304  |

4s\_Renantiomer\_conformer-078

|   |         |          |          |
|---|---------|----------|----------|
| C | 3.36261 | 0.41665  | -0.23156 |
| N | 3.36419 | -1.76142 | 0.29550  |
| H | 3.70567 | -2.69138 | 0.49775  |
| C | 2.05484 | -1.41663 | 0.21377  |

|   |          |          |          |
|---|----------|----------|----------|
| C | 2.00208  | -0.06044 | -0.10820 |
| C | -0.32781 | -1.69618 | -0.29995 |
| C | 0.88011  | -2.31152 | 0.42171  |
| H | -0.18320 | -1.78829 | -1.38486 |
| H | -1.24448 | -2.23634 | -0.04907 |
| H | 1.08337  | -3.32411 | 0.05357  |
| H | 0.66063  | -2.40650 | 1.49609  |
| C | 0.73789  | 0.63098  | -0.26020 |
| O | 0.64105  | 1.82188  | -0.57744 |
| C | -0.51558 | -0.20982 | 0.04979  |
| C | -1.75676 | 0.38418  | -0.62600 |
| H | -1.79287 | 1.46912  | -0.43784 |
| H | -1.65117 | 0.25986  | -1.71086 |
| C | -4.66006 | 0.96772  | 1.14045  |
| C | -3.43998 | 0.05166  | 1.14197  |
| N | -2.99159 | -0.28945 | -0.22488 |
| C | -4.05628 | -0.08729 | -1.21376 |
| C | -5.40003 | -0.47742 | -0.61859 |
| O | -5.77474 | 0.36953  | 0.47395  |
| H | -4.40548 | 1.92757  | 0.66554  |
| H | -4.98381 | 1.17817  | 2.16487  |
| H | -3.68468 | -0.86558 | 1.69392  |
| H | -2.62919 | 0.54453  | 1.68771  |
| H | -4.11499 | 0.96078  | -1.56180 |
| H | -3.85073 | -0.70525 | -2.09639 |
| H | -6.18944 | -0.39509 | -1.37246 |
| H | -5.35793 | -1.52443 | -0.28165 |
| C | 3.78890  | 1.82412  | -0.53445 |
| H | 4.83810  | 1.83127  | -0.85311 |
| H | 3.19844  | 2.20848  | -1.37321 |
| C | 3.61376  | 2.76995  | 0.66455  |
| H | 4.20163  | 2.42466  | 1.52268  |
| H | 3.93886  | 3.78654  | 0.41340  |
| H | 2.56144  | 2.81069  | 0.96101  |
| C | 4.18179  | -0.66078 | 0.02785  |
| C | 5.66884  | -0.79491 | 0.05874  |
| H | 6.03510  | -1.05022 | 1.06155  |
| H | 6.02099  | -1.57654 | -0.62650 |
| H | 6.14080  | 0.14530  | -0.23662 |
| H | -0.64176 | -0.13992 | 1.14317  |

4s\_Renantiomer\_conformer-079

|   |          |          |          |
|---|----------|----------|----------|
| C | -2.66965 | -0.17597 | 0.08095  |
| N | -2.08505 | 1.17995  | -1.60464 |
| H | -2.11969 | 1.66814  | -2.48951 |



|   |          |          |          |
|---|----------|----------|----------|
| C | -1.10419 | 1.32061  | -0.67806 |
| C | -1.42348 | 0.48972  | 0.39474  |
| C | 0.65521  | 2.48186  | 0.59749  |
| C | 0.13062  | 2.13984  | -0.80907 |
| H | 1.66010  | 2.91175  | 0.52518  |
| H | 0.00793  | 3.27109  | 0.99730  |
| H | 0.88000  | 1.58200  | -1.38678 |
| H | -0.06220 | 3.06220  | -1.36936 |
| C | -0.55953 | 0.38109  | 1.54830  |
| O | -0.74443 | -0.42265 | 2.47178  |
| C | 0.65817  | 1.31957  | 1.61818  |
| C | 1.98375  | 0.50403  | 1.76084  |
| H | 2.75432  | 1.19367  | 2.12416  |
| H | 1.79069  | -0.22107 | 2.56088  |
| C | 4.15428  | -0.43285 | -1.17702 |
| C | 3.34621  | 0.53884  | -0.32136 |
| N | 2.55711  | -0.21754 | 0.64018  |
| C | 1.70318  | -1.20847 | -0.00116 |
| C | 2.55608  | -2.12044 | -0.87768 |
| O | 3.30029  | -1.36751 | -1.83318 |
| H | 4.87714  | -0.96947 | -0.54216 |
| H | 4.69664  | 0.09967  | -1.96352 |
| H | 2.73430  | 1.16142  | -0.99688 |
| H | 4.02584  | 1.20676  | 0.22001  |
| H | 1.20118  | -1.80085 | 0.77171  |
| H | 0.91733  | -0.74894 | -0.62498 |
| H | 3.24465  | -2.70173 | -0.24399 |
| H | 1.92741  | -2.81142 | -1.44652 |
| C | -3.37437 | -1.19447 | 0.92935  |
| H | -3.37473 | -0.86017 | 1.97253  |
| H | -4.42338 | -1.27233 | 0.61923  |
| C | -2.71554 | -2.58152 | 0.85621  |
| H | -1.68287 | -2.52256 | 1.21232  |
| H | -3.25380 | -3.30600 | 1.47891  |
| H | -2.70669 | -2.95502 | -0.17413 |
| C | -3.05388 | 0.27564  | -1.16280 |
| C | -4.24205 | -0.03843 | -2.01079 |
| H | -4.81534 | 0.86396  | -2.25890 |
| H | -3.95312 | -0.51263 | -2.95764 |
| H | -4.91075 | -0.72554 | -1.48675 |
| H | 0.56486  | 1.77710  | 2.61263  |

4s\_Renantiomer\_conformer-080

|   |          |         |          |
|---|----------|---------|----------|
| C | -2.55132 | 0.24832 | -0.41891 |
| N | -1.89764 | 1.72321 | 1.13632  |

|   |          |          |          |
|---|----------|----------|----------|
| H | -1.87269 | 2.55906  | 1.70468  |
| C | -1.01710 | 0.69542  | 1.22848  |
| C | -1.38577 | -0.25411 | 0.27686  |
| C | 0.57493  | -0.84503 | 2.30808  |
| C | 0.18083  | 0.62983  | 2.10855  |
| H | 1.55941  | -0.90577 | 2.78445  |
| H | -0.14095 | -1.27473 | 3.01844  |
| H | 1.00107  | 1.20131  | 1.65339  |
| H | -0.01468 | 1.09805  | 3.08045  |
| C | -0.60844 | -1.45461 | 0.06889  |
| O | -0.82564 | -2.26317 | -0.84340 |
| C | 0.55644  | -1.72591 | 1.03696  |
| C | 1.90390  | -1.88058 | 0.26081  |
| H | 2.61056  | -2.38566 | 0.92925  |
| H | 1.68325  | -2.57042 | -0.56303 |
| C | 4.34861  | 0.94612  | -0.23737 |
| C | 3.42953  | 0.05783  | 0.59676  |
| N | 2.59624  | -0.73376 | -0.29650 |
| C | 1.84246  | 0.09351  | -1.22892 |
| C | 2.80524  | 0.99045  | -2.00097 |
| O | 3.59502  | 1.78053  | -1.11449 |
| H | 5.03804  | 0.31641  | -0.82189 |
| H | 4.93155  | 1.61362  | 0.40370  |
| H | 2.85032  | 0.70742  | 1.27591  |
| H | 4.03138  | -0.61658 | 1.21645  |
| H | 1.30031  | -0.55583 | -1.92508 |
| H | 1.09551  | 0.72791  | -0.72163 |
| H | 3.46155  | 0.36969  | -2.63145 |
| H | 2.25792  | 1.69065  | -2.63850 |
| C | -3.30773 | -0.45526 | -1.50811 |
| H | -3.96885 | 0.25656  | -2.01654 |
| H | -2.59908 | -0.82480 | -2.25728 |
| C | -4.13652 | -1.64119 | -0.98954 |
| H | -4.68061 | -2.12727 | -1.80794 |
| H | -3.48121 | -2.38469 | -0.52616 |
| H | -4.86651 | -1.31039 | -0.24197 |
| C | -2.84715 | 1.47117  | 0.14279  |
| C | -3.93991 | 2.45237  | -0.12736 |
| H | -4.61266 | 2.56136  | 0.73319  |
| H | -3.54290 | 3.44860  | -0.36008 |
| H | -4.54167 | 2.12545  | -0.97874 |
| H | 0.36768  | -2.75483 | 1.37269  |

4s\_Renantiomer\_conformer-081

|   |          |         |          |
|---|----------|---------|----------|
| C | -2.76831 | 0.57929 | -0.26112 |
|---|----------|---------|----------|

|   |          |          |          |
|---|----------|----------|----------|
| N | -3.11411 | -1.26455 | 0.96537  |
| H | -3.55950 | -1.91984 | 1.59363  |
| C | -1.90838 | -1.45253 | 0.37425  |
| C | -1.64773 | -0.32504 | -0.40454 |
| C | 0.41572  | -2.20979 | 0.20223  |
| C | -1.02745 | -2.64924 | 0.49145  |
| H | 0.77721  | -1.59884 | 1.03501  |
| H | 1.07190  | -3.08552 | 0.14728  |
| H | -1.10351 | -3.10166 | 1.48712  |
| H | -1.33830 | -3.42077 | -0.22911 |
| C | -0.45952 | -0.23417 | -1.22492 |
| O | -0.24765 | 0.68520  | -2.02388 |
| C | 0.53980  | -1.40674 | -1.10530 |
| C | 1.98449  | -0.96201 | -1.38283 |
| H | 2.56580  | -1.84398 | -1.67711 |
| H | 1.97758  | -0.27277 | -2.24425 |
| C | 4.72648  | 0.80280  | 0.45485  |
| C | 4.09881  | -0.20963 | -0.51728 |
| N | 2.66858  | -0.38181 | -0.23014 |
| C | 2.09597  | 0.85420  | 0.28918  |
| C | 2.73692  | 1.15245  | 1.65511  |
| O | 4.10179  | 0.73303  | 1.72774  |
| H | 4.65240  | 1.82355  | 0.05022  |
| H | 5.78643  | 0.58357  | 0.60739  |
| H | 4.58800  | -1.18780 | -0.42986 |
| H | 4.26953  | 0.15036  | -1.54962 |
| H | 2.22019  | 1.70243  | -0.40916 |
| H | 1.02156  | 0.73339  | 0.44091  |
| H | 2.65787  | 2.22850  | 1.87533  |
| H | 2.21556  | 0.60043  | 2.44357  |
| C | -2.89413 | 1.94016  | -0.88225 |
| H | -2.67011 | 1.87311  | -1.95254 |
| H | -3.92869 | 2.29223  | -0.79377 |
| C | -1.94728 | 2.97082  | -0.24587 |
| H | -2.14594 | 3.07258  | 0.82711  |
| H | -0.90680 | 2.65807  | -0.37565 |
| H | -2.06879 | 3.95576  | -0.71188 |
| C | -3.65602 | -0.02934 | 0.59901  |
| C | -4.97189 | 0.41331  | 1.14885  |
| H | -4.93786 | 0.53587  | 2.23917  |
| H | -5.26000 | 1.37439  | 0.71628  |
| H | -5.76916 | -0.30708 | 0.92569  |
| H | 0.26530  | -2.07455 | -1.93818 |

4s\_Renantiomer\_conformer-082

|   |          |          |          |
|---|----------|----------|----------|
| C | -3.24751 | 0.18117  | -0.05116 |
| N | -2.64177 | -1.96452 | 0.17272  |
| H | -2.70463 | -2.95714 | 0.35491  |
| C | -1.53187 | -1.32865 | -0.27864 |
| C | -1.86047 | 0.01984  | -0.42938 |
| C | 0.56853  | -1.03092 | -1.52512 |
| C | -0.20458 | -1.94804 | -0.56200 |
| H | 1.60658  | -1.36511 | -1.59950 |
| H | 0.11943  | -1.10626 | -2.52274 |
| H | 0.36370  | -2.07554 | 0.37051  |
| H | -0.32046 | -2.94945 | -0.99290 |
| C | -0.88265 | 0.98455  | -0.88611 |
| O | -1.11559 | 2.18606  | -1.06021 |
| C | 0.54120  | 0.44233  | -1.08266 |
| C | 1.30238  | 0.68059  | 0.24169  |
| H | 1.29500  | 1.76478  | 0.46133  |
| H | 0.75448  | 0.19519  | 1.05809  |
| C | 4.84673  | -0.04895 | -0.77826 |
| C | 3.58664  | 0.82061  | -0.63384 |
| N | 2.65080  | 0.13179  | 0.24642  |
| C | 3.19023  | 0.06164  | 1.61110  |
| C | 4.72342  | -0.07577 | 1.57063  |
| O | 5.13729  | -0.78523 | 0.41237  |
| H | 5.70619  | 0.58093  | -1.05562 |
| H | 4.70069  | -0.79927 | -1.56135 |
| H | 3.13811  | 0.95524  | -1.62132 |
| H | 3.83851  | 1.83066  | -0.25861 |
| H | 2.93783  | 0.96312  | 2.20048  |
| H | 2.73344  | -0.79780 | 2.11634  |
| H | 5.20027  | 0.91550  | 1.59997  |
| H | 5.08204  | -0.64114 | 2.43450  |
| C | -4.01426 | 1.47157  | -0.01901 |
| H | -3.83278 | 2.02415  | -0.94738 |
| H | -5.08970 | 1.26165  | 0.02224  |
| C | -3.62189 | 2.36467  | 1.16916  |
| H | -2.56047 | 2.62316  | 1.10990  |
| H | -4.20209 | 3.29501  | 1.16939  |
| H | -3.80020 | 1.84938  | 2.11985  |
| C | -3.70155 | -1.06581 | 0.31941  |
| C | -5.03245 | -1.53499 | 0.80791  |
| H | -5.43673 | -2.33792 | 0.17836  |
| H | -4.97803 | -1.92035 | 1.83426  |
| H | -5.75073 | -0.71162 | 0.80087  |
| H | 0.99158  | 1.06220  | -1.86511 |

4s\_Renantiomer\_conformer-083

|   |          |          |          |
|---|----------|----------|----------|
| C | 2.72889  | -0.52515 | 0.35211  |
| N | 2.96362  | 1.69818  | 0.50776  |
| H | 3.35183  | 2.59938  | 0.75191  |
| C | 1.79146  | 1.51006  | -0.14750 |
| C | 1.60250  | 0.13359  | -0.27335 |
| C | -0.53816 | 1.97042  | -0.75647 |
| C | 0.87499  | 2.56536  | -0.66514 |
| H | -0.93470 | 1.83140  | 0.25398  |
| H | -1.20961 | 2.67194  | -1.26368 |
| H | 0.88328  | 3.45016  | -0.01790 |
| H | 1.20657  | 2.90005  | -1.65976 |
| C | 0.45000  | -0.41087 | -0.95854 |
| O | 0.28268  | -1.61843 | -1.16458 |
| C | -0.56301 | 0.62286  | -1.50035 |
| C | -1.98221 | 0.04656  | -1.62163 |
| H | -2.52933 | 0.63897  | -2.36457 |
| H | -1.91057 | -0.98251 | -2.01296 |
| C | -4.89453 | -0.59941 | 0.64277  |
| C | -4.17301 | -0.20942 | -0.65831 |
| N | -2.76425 | 0.10631  | -0.38988 |
| C | -2.26112 | -0.69722 | 0.71725  |
| C | -3.00211 | -0.27786 | 1.99818  |
| O | -4.35605 | 0.10856  | 1.74930  |
| H | -4.82252 | -1.68415 | 0.81390  |
| H | -5.95565 | -0.34319 | 0.58631  |
| H | -4.64232 | 0.67100  | -1.11473 |
| H | -4.27737 | -1.04510 | -1.37624 |
| H | -2.36228 | -1.78221 | 0.52952  |
| H | -1.19606 | -0.50698 | 0.86283  |
| H | -2.96998 | -1.09806 | 2.73229  |
| H | -2.52096 | 0.59999  | 2.44099  |
| C | 2.96213  | -2.00611 | 0.43304  |
| H | 3.68385  | -2.22336 | 1.22961  |
| H | 2.02552  | -2.50388 | 0.70705  |
| C | 3.46771  | -2.60197 | -0.89060 |
| H | 4.41331  | -2.13680 | -1.19172 |
| H | 3.63161  | -3.68215 | -0.79778 |
| H | 2.73151  | -2.43312 | -1.68188 |
| C | 3.55309  | 0.47199  | 0.82635  |
| C | 4.85322  | 0.42175  | 1.55905  |
| H | 5.66831  | 0.86840  | 0.97510  |
| H | 4.80303  | 0.95926  | 2.51453  |
| H | 5.12793  | -0.61410 | 1.77243  |
| H | -0.22298 | 0.80501  | -2.53326 |

## 4s\_Renantiomer\_conformer-084

|   |          |          |          |
|---|----------|----------|----------|
| C | 3.18424  | 0.06480  | -0.37665 |
| N | 2.55146  | -1.98563 | 0.26870  |
| H | 2.59191  | -2.97720 | 0.46257  |
| C | 1.48200  | -1.18990 | 0.51937  |
| C | 1.82964  | 0.10516  | 0.13050  |
| C | -0.53269 | -0.37507 | 1.67108  |
| C | 0.17208  | -1.61423 | 1.09352  |
| H | -1.56484 | -0.62422 | 1.93034  |
| H | -0.01900 | -0.07268 | 2.59156  |
| H | -0.45491 | -2.07387 | 0.31618  |
| H | 0.31015  | -2.37624 | 1.86964  |
| C | 0.88253  | 1.19633  | 0.22217  |
| O | 1.12777  | 2.36336  | -0.10358 |
| C | -0.52871 | 0.81168  | 0.69197  |
| C | -1.37463 | 0.54204  | -0.57348 |
| H | -1.38073 | 1.45749  | -1.19444 |
| H | -0.88262 | -0.23468 | -1.17101 |
| C | -4.87581 | -0.59563 | -1.28323 |
| C | -3.35011 | -0.51120 | -1.47645 |
| N | -2.72050 | 0.06908  | -0.28334 |
| C | -3.59707 | 1.06674  | 0.31751  |
| C | -4.84053 | 0.34939  | 0.86992  |
| O | -5.20225 | -0.78957 | 0.08506  |
| H | -5.28697 | -1.44686 | -1.83174 |
| H | -5.36364 | 0.31388  | -1.66494 |
| H | -3.14711 | 0.08938  | -2.38311 |
| H | -2.92054 | -1.50672 | -1.64061 |
| H | -3.08297 | 1.56498  | 1.14321  |
| H | -3.87868 | 1.85657  | -0.40459 |
| H | -4.64018 | -0.03586 | 1.87437  |
| H | -5.68417 | 1.05444  | 0.92932  |
| C | 3.98105  | 1.23517  | -0.87573 |
| H | 4.84272  | 0.87669  | -1.45130 |
| H | 3.36433  | 1.82659  | -1.56157 |
| C | 4.46889  | 2.14999  | 0.25911  |
| H | 3.61370  | 2.55439  | 0.80849  |
| H | 5.10154  | 1.59616  | 0.96212  |
| H | 5.05114  | 2.99037  | -0.13700 |
| C | 3.60315  | -1.24389 | -0.27525 |
| C | 4.89688  | -1.90391 | -0.62241 |
| H | 4.75665  | -2.72467 | -1.33737 |
| H | 5.58185  | -1.18186 | -1.07334 |
| H | 5.39134  | -2.32303 | 0.26347  |
| H | -0.92522 | 1.69782  | 1.19880  |

## 4s\_Renantiomer\_conformer-085

|   |          |          |          |
|---|----------|----------|----------|
| C | -3.21865 | 0.35314  | -0.08656 |
| N | -2.89155 | -1.78224 | 0.50854  |
| H | -3.07968 | -2.71116 | 0.86081  |
| C | -1.71685 | -1.38381 | -0.04052 |
| C | -1.87092 | -0.05027 | -0.42378 |
| C | 0.38365  | -1.58123 | -1.30788 |
| C | -0.48549 | -2.20975 | -0.20505 |
| H | 1.36905  | -2.05487 | -1.31493 |
| H | -0.08643 | -1.77187 | -2.28012 |
| H | 0.07668  | -2.24762 | 0.73899  |
| H | -0.73658 | -3.24682 | -0.45688 |
| C | -0.78490 | 0.68617  | -1.03492 |
| O | -0.86358 | 1.86124  | -1.41128 |
| C | 0.55254  | -0.06223 | -1.13188 |
| C | 1.37212  | 0.30279  | 0.12756  |
| H | 1.47658  | 1.40404  | 0.15539  |
| H | 0.80486  | 0.01150  | 1.01795  |
| C | 5.00638  | -0.18173 | -0.54231 |
| C | 3.55184  | 0.07230  | -0.90922 |
| N | 2.66123  | -0.37716 | 0.17200  |
| C | 3.32193  | -0.30414 | 1.48848  |
| C | 4.37380  | 0.79865  | 1.55082  |
| O | 5.41840  | 0.58174  | 0.59411  |
| H | 5.65988  | 0.11099  | -1.36941 |
| H | 5.15821  | -1.25592 | -0.35673 |
| H | 3.31257  | -0.45779 | -1.83902 |
| H | 3.42605  | 1.15205  | -1.11138 |
| H | 2.56664  | -0.13972 | 2.26243  |
| H | 3.80496  | -1.26472 | 1.71126  |
| H | 3.90189  | 1.77661  | 1.37067  |
| H | 4.84678  | 0.83071  | 2.53835  |
| C | -3.81169 | 1.71815  | -0.28407 |
| H | -3.57787 | 2.07157  | -1.29434 |
| H | -4.90426 | 1.66065  | -0.21098 |
| C | -3.28485 | 2.74602  | 0.73042  |
| H | -2.20022 | 2.84879  | 0.63126  |
| H | -3.73949 | 3.72988  | 0.56460  |
| H | -3.51084 | 2.43273  | 1.75607  |
| C | -3.82351 | -0.74139 | 0.49182  |
| C | -5.19477 | -0.94224 | 1.04767  |
| H | -5.70783 | -1.78630 | 0.56938  |
| H | -5.17274 | -1.14228 | 2.12675  |
| H | -5.80305 | -0.04853 | 0.88882  |

|   |         |         |          |
|---|---------|---------|----------|
| H | 1.06477 | 0.34757 | -2.00887 |
|---|---------|---------|----------|

4s\_Renantiomer\_conformer-086

|   |          |          |          |
|---|----------|----------|----------|
| C | 3.15231  | -0.25351 | -0.04126 |
| N | 2.70928  | 1.86491  | 0.54005  |
| H | 2.84406  | 2.80221  | 0.89477  |
| C | 1.57126  | 1.41186  | -0.04235 |
| C | 1.79734  | 0.08705  | -0.41790 |
| C | -0.50067 | 1.50269  | -1.36866 |
| C | 0.31357  | 2.18381  | -0.25361 |
| H | -1.49522 | 1.95633  | -1.41752 |
| H | -0.01146 | 1.70480  | -2.32906 |
| H | -0.26985 | 2.22525  | 0.67694  |
| H | 0.52985  | 3.22385  | -0.52501 |
| C | 0.76813  | -0.69793 | -1.06242 |
| O | 0.92102  | -1.86256 | -1.44671 |
| C | -0.61044 | -0.02676 | -1.19152 |
| C | -1.47415 | -0.46263 | 0.02423  |
| H | -1.00285 | -1.32140 | 0.51374  |
| H | -1.48089 | 0.34771  | 0.77134  |
| C | -4.21706 | 1.11905  | 0.02491  |
| C | -3.67020 | 0.10778  | -0.98410 |
| N | -2.81552 | -0.91544 | -0.36541 |
| C | -3.54877 | -1.52638 | 0.75279  |
| C | -4.10634 | -0.49631 | 1.73870  |
| O | -4.93508 | 0.45288  | 1.06516  |
| H | -4.92581 | 1.80268  | -0.45217 |
| H | -3.40214 | 1.71987  | 0.46029  |
| H | -3.12577 | 0.61375  | -1.78544 |
| H | -4.52081 | -0.41012 | -1.44587 |
| H | -4.38993 | -2.09285 | 0.33184  |
| H | -2.89199 | -2.23353 | 1.27181  |
| H | -4.73743 | -0.97866 | 2.49134  |
| H | -3.28934 | 0.02689  | 2.26073  |
| C | 3.81544  | -1.58822 | -0.22237 |
| H | 3.63463  | -1.94607 | -1.24193 |
| H | 4.90073  | -1.47923 | -0.11024 |
| C | 3.30297  | -2.64642 | 0.76792  |
| H | 3.47474  | -2.32825 | 1.80253  |
| H | 2.22934  | -2.80289 | 0.62751  |
| H | 3.81209  | -3.60541 | 0.61536  |
| C | 3.68805  | 0.86774  | 0.55343  |
| C | 5.03077  | 1.13134  | 1.15112  |
| H | 4.96520  | 1.33460  | 2.22779  |
| H | 5.68262  | 0.26486  | 1.01650  |



|   |          |          |          |
|---|----------|----------|----------|
| H | 5.52060  | 1.99553  | 0.68466  |
| H | -1.06749 | -0.46780 | -2.08342 |

4s\_Renantiomer\_conformer-087

|   |          |          |          |
|---|----------|----------|----------|
| C | 2.67539  | -0.69088 | -0.21793 |
| N | 3.11207  | 1.22145  | 0.86396  |
| H | 3.60339  | 1.91090  | 1.41669  |
| C | 1.92472  | 1.42990  | 0.23770  |
| C | 1.60940  | 0.25733  | -0.44827 |
| C | 0.08839  | 2.65527  | -0.87893 |
| C | 1.11939  | 2.68662  | 0.26735  |
| H | -0.66367 | 3.43653  | -0.72104 |
| H | 0.59998  | 2.88935  | -1.81976 |
| H | 0.61213  | 2.78750  | 1.23694  |
| H | 1.76357  | 3.56872  | 0.16974  |
| C | 0.40588  | 0.15645  | -1.24927 |
| O | 0.17545  | -0.75862 | -2.04549 |
| C | -0.60792 | 1.28582  | -1.03202 |
| C | -1.48669 | 0.98297  | 0.20131  |
| H | -0.89042 | 1.13151  | 1.10745  |
| H | -2.28945 | 1.74053  | 0.22853  |
| C | -4.01243 | -0.17482 | 1.67730  |
| C | -2.59380 | -0.73460 | 1.54106  |
| N | -1.96673 | -0.39892 | 0.25666  |
| C | -2.87130 | -0.79100 | -0.83381 |
| C | -4.27955 | -0.22171 | -0.66490 |
| O | -4.83485 | -0.61115 | 0.59402  |
| H | -3.99481 | 0.92644  | 1.71175  |
| H | -4.48902 | -0.53690 | 2.59353  |
| H | -2.64531 | -1.82908 | 1.61353  |
| H | -1.96055 | -0.37227 | 2.35884  |
| H | -2.43649 | -0.50145 | -1.79258 |
| H | -2.93904 | -1.88675 | -0.82473 |
| H | -4.27047 | 0.87757  | -0.74306 |
| H | -4.95416 | -0.61151 | -1.43337 |
| C | 2.71474  | -2.10614 | -0.71692 |
| H | 2.47330  | -2.11936 | -1.78503 |
| H | 3.72838  | -2.51067 | -0.61106 |
| C | 1.72015  | -3.01591 | 0.02354  |
| H | 0.70005  | -2.63805 | -0.09420 |
| H | 1.75479  | -4.03903 | -0.36905 |
| H | 1.94941  | -3.05202 | 1.09470  |
| C | 3.58713  | -0.06605 | 0.60520  |
| C | 4.87297  | -0.53585 | 1.20178  |
| H | 5.70758  | 0.12826  | 0.94334  |

|   |          |          |          |
|---|----------|----------|----------|
| H | 4.82172  | -0.58525 | 2.29717  |
| H | 5.11715  | -1.53617 | 0.83599  |
| H | -1.23913 | 1.31733  | -1.92581 |

4s\_Renantiomer\_conformer-088

|   |          |          |          |
|---|----------|----------|----------|
| C | -3.06121 | 0.62990  | 0.23126  |
| N | -3.57615 | -1.39285 | -0.58470 |
| H | -4.12551 | -2.16466 | -0.93805 |
| C | -2.24186 | -1.43552 | -0.34266 |
| C | -1.87132 | -0.19040 | 0.16274  |
| C | -0.08284 | -2.41014 | 0.31380  |
| C | -1.32971 | -2.59328 | -0.56549 |
| H | -0.34855 | -2.59158 | 1.36361  |
| H | 0.67415  | -3.15233 | 0.03903  |
| H | -1.83001 | -3.54253 | -0.34034 |
| H | -1.02856 | -2.64014 | -1.62305 |
| C | -0.50036 | 0.10056  | 0.53056  |
| O | -0.14954 | 1.16328  | 1.05391  |
| C | 0.52525  | -0.99769 | 0.18353  |
| C | 1.84259  | -0.86543 | 0.97344  |
| H | 1.67776  | -0.23888 | 1.86649  |
| H | 2.14259  | -1.85879 | 1.32509  |
| C | 4.10291  | 1.64163  | -0.70976 |
| C | 2.75841  | 1.04296  | -0.25534 |
| N | 2.94284  | -0.35899 | 0.15302  |
| C | 4.24511  | -0.52113 | 0.78745  |
| C | 5.33633  | -0.31031 | -0.27702 |
| O | 4.94659  | 0.64365  | -1.26722 |
| H | 4.60923  | 2.13541  | 0.13380  |
| H | 3.94733  | 2.39411  | -1.48728 |
| H | 2.02711  | 1.07745  | -1.07048 |
| H | 2.35157  | 1.65598  | 0.56517  |
| H | 4.38648  | 0.17093  | 1.63992  |
| H | 4.32905  | -1.53578 | 1.19009  |
| H | 6.27556  | 0.00325  | 0.20541  |
| H | 5.52160  | -1.24190 | -0.82052 |
| C | -3.13122 | 2.05943  | 0.68500  |
| H | -4.17392 | 2.33145  | 0.88773  |
| H | -2.58421 | 2.16644  | 1.62808  |
| C | -2.53790 | 3.03895  | -0.34037 |
| H | -1.48171 | 2.81022  | -0.51082 |
| H | -3.06615 | 2.96886  | -1.29810 |
| H | -2.61129 | 4.07304  | 0.01660  |
| C | -4.09868 | -0.14305 | -0.24355 |
| C | -5.55242 | 0.14628  | -0.42482 |

|   |          |          |          |
|---|----------|----------|----------|
| H | -5.78937 | 1.14637  | -0.05396 |
| H | -5.84844 | 0.10457  | -1.48099 |
| H | -6.18081 | -0.57039 | 0.11923  |
| H | 0.76433  | -0.85029 | -0.88114 |

4s\_Renantiomer\_conformer-089

|   |          |          |          |
|---|----------|----------|----------|
| C | 3.02762  | -0.65399 | -0.25788 |
| N | 3.50506  | 1.51968  | -0.52125 |
| H | 4.03425  | 2.36398  | -0.69302 |
| C | 2.18760  | 1.48056  | -0.19967 |
| C | 1.84164  | 0.14142  | -0.02543 |
| C | 0.06004  | 2.21677  | 0.78579  |
| C | 1.26663  | 2.64493  | -0.06359 |
| H | 0.37167  | 2.11185  | 1.83334  |
| H | -0.70856 | 2.99624  | 0.75383  |
| H | 1.77625  | 3.50436  | 0.38771  |
| H | 0.91938  | 2.97108  | -1.05567 |
| C | 0.48590  | -0.25527 | 0.29876  |
| O | 0.15562  | -1.42507 | 0.52038  |
| C | -0.55346 | 0.88456  | 0.30550  |
| C | -1.83387 | 0.52947  | 1.08815  |
| H | -1.63417 | -0.32362 | 1.75851  |
| H | -2.10696 | 1.38140  | 1.72059  |
| C | -4.19084 | -1.42410 | -1.11111 |
| C | -2.82092 | -0.95625 | -0.58651 |
| N | -2.97619 | 0.27140  | 0.21130  |
| C | -4.24502 | 0.23943  | 0.92838  |
| C | -5.38885 | 0.32497  | -0.09731 |
| O | -5.05922 | -0.32083 | -1.32925 |
| H | -4.65145 | -2.13354 | -0.40686 |
| H | -4.08206 | -1.93603 | -2.07080 |
| H | -2.14147 | -0.74876 | -1.42067 |
| H | -2.36533 | -1.76852 | 0.00223  |
| H | -4.34827 | -0.66356 | 1.56018  |
| H | -4.30319 | 1.10092  | 1.60152  |
| H | -6.30696 | -0.11056 | 0.32732  |
| H | -5.58960 | 1.36944  | -0.35496 |
| C | 3.13522  | -2.14786 | -0.15030 |
| H | 2.27718  | -2.60958 | -0.65110 |
| H | 4.03365  | -2.49178 | -0.67653 |
| C | 3.17726  | -2.63800 | 1.30590  |
| H | 4.03269  | -2.20683 | 1.83828  |
| H | 2.26157  | -2.34326 | 1.82670  |
| H | 3.26148  | -3.73028 | 1.35030  |
| C | 4.04018  | 0.23033  | -0.56193 |

|   |          |          |          |
|---|----------|----------|----------|
| C | 5.48316  | 0.01665  | -0.88236 |
| H | 5.75357  | 0.45083  | -1.85321 |
| H | 6.13981  | 0.46872  | -0.12784 |
| H | 5.70915  | -1.05172 | -0.91984 |
| H | -0.83971 | 1.02709  | -0.74792 |

4s\_Renantiomer\_conformer-090

|   |          |          |          |
|---|----------|----------|----------|
| C | -3.38009 | -0.31375 | -0.20682 |
| N | -3.17034 | 1.89952  | 0.07510  |
| H | -3.41932 | 2.87579  | 0.16067  |
| C | -1.90126 | 1.42051  | 0.06566  |
| C | -1.98053 | 0.03827  | -0.10235 |
| C | 0.50492  | 1.40613  | -0.41809 |
| C | -0.64518 | 2.21196  | 0.20387  |
| H | 0.38632  | 1.39222  | -1.50982 |
| H | 1.46554  | 1.88337  | -0.20755 |
| H | -0.74032 | 3.19331  | -0.27575 |
| H | -0.43091 | 2.40167  | 1.26668  |
| C | -0.79041 | -0.78643 | -0.14788 |
| O | -0.80921 | -2.00906 | -0.32952 |
| C | 0.53839  | -0.04476 | 0.09342  |
| C | 1.71053  | -0.83814 | -0.49730 |
| H | 1.68304  | -1.86662 | -0.09840 |
| H | 1.57059  | -0.91387 | -1.58272 |
| C | 4.86217  | 0.00054  | 1.35263  |
| C | 3.34146  | -0.14140 | 1.17154  |
| N | 2.99896  | -0.19767 | -0.25692 |
| C | 4.08236  | -0.80156 | -1.02220 |
| C | 5.30897  | 0.12158  | -0.95601 |
| O | 5.42348  | 0.78189  | 0.30813  |
| H | 5.34213  | -0.98888 | 1.38992  |
| H | 5.08986  | 0.51408  | 2.29021  |
| H | 2.82655  | 0.71325  | 1.62536  |
| H | 3.00743  | -1.04958 | 1.70823  |
| H | 4.33372  | -1.81792 | -0.66400 |
| H | 3.76994  | -0.90594 | -2.06616 |
| H | 6.22289  | -0.45498 | -1.16719 |
| H | 5.22312  | 0.91883  | -1.70090 |
| C | -3.94053 | -1.69795 | -0.36237 |
| H | -4.97960 | -1.63910 | -0.70773 |
| H | -3.37687 | -2.23119 | -1.13556 |
| C | -3.88084 | -2.51278 | 0.93967  |
| H | -4.44609 | -2.01638 | 1.73669  |
| H | -4.30047 | -3.51539 | 0.79521  |
| H | -2.84284 | -2.62027 | 1.26824  |

|   |          |          |          |
|---|----------|----------|----------|
| C | -4.09047 | 0.86129  | -0.08961 |
| C | -5.55680 | 1.14310  | -0.11086 |
| H | -5.90853 | 1.54884  | 0.84652  |
| H | -5.82036 | 1.86958  | -0.89013 |
| H | -6.11654 | 0.22544  | -0.30715 |
| H | 0.65005  | -0.01145 | 1.18949  |

4s\_Renantiomer\_conformer-091

|   |          |          |          |
|---|----------|----------|----------|
| C | 3.10922  | 0.44983  | 0.06502  |
| N | 2.92203  | -1.70568 | -0.51785 |
| H | 3.16652  | -2.61965 | -0.87467 |
| C | 1.73720  | -1.39184 | 0.06314  |
| C | 1.80385  | -0.04921 | 0.43985  |
| C | -0.30619 | -1.74079 | 1.39011  |
| C | 0.57519  | -2.30547 | 0.26256  |
| H | -1.25635 | -2.28009 | 1.42357  |
| H | 0.20352  | -1.89768 | 2.34833  |
| H | -0.00766 | -2.38761 | -0.66627 |
| H | 0.90954  | -3.32061 | 0.50677  |
| C | 0.68273  | 0.60758  | 1.07774  |
| O | 0.68083  | 1.78968  | 1.44087  |
| C | -0.59015 | -0.23892 | 1.22187  |
| C | -1.48199 | 0.06680  | -0.00603 |
| H | -1.62430 | 1.15811  | -0.05482 |
| H | -0.94088 | -0.21414 | -0.91604 |
| C | -4.07239 | 0.40014  | -1.79374 |
| C | -3.35022 | -0.85864 | -1.31010 |
| N | -2.73299 | -0.69208 | 0.01129  |
| C | -3.73521 | -0.17650 | 0.95487  |
| C | -4.45448 | 1.06862  | 0.43125  |
| O | -5.05305 | 0.81266  | -0.84047 |
| H | -4.60902 | 0.21074  | -2.72854 |
| H | -3.35299 | 1.21701  | -1.96724 |
| H | -2.58316 | -1.16219 | -2.03088 |
| H | -4.08482 | -1.67192 | -1.23776 |
| H | -4.47950 | -0.96613 | 1.12028  |
| H | -3.26031 | 0.03584  | 1.91765  |
| H | -5.26669 | 1.36087  | 1.10372  |
| H | -3.75600 | 1.91665  | 0.34852  |
| C | 3.60849  | 1.85438  | 0.24429  |
| H | 3.37381  | 2.19588  | 1.25850  |
| H | 4.70048  | 1.87362  | 0.14644  |
| C | 2.98805  | 2.83697  | -0.76202 |
| H | 3.21328  | 2.53494  | -1.79120 |
| H | 1.90128  | 2.86284  | -0.63940 |

|   |          |          |          |
|---|----------|----------|----------|
| H | 3.37502  | 3.85153  | -0.61003 |
| C | 3.77610  | -0.59997 | -0.52797 |
| C | 5.14367  | -0.70348 | -1.11869 |
| H | 5.73164  | -1.50055 | -0.64597 |
| H | 5.10834  | -0.91763 | -2.19470 |
| H | 5.68648  | 0.23542  | -0.98547 |
| H | -1.09699 | 0.13342  | 2.11895  |

4s\_Renantiomer\_conformer-092

|   |          |          |          |
|---|----------|----------|----------|
| C | 2.69163  | 0.68684  | 0.31115  |
| N | 3.27813  | -1.13290 | -0.85843 |
| H | 3.81971  | -1.75532 | -1.44300 |
| C | 2.05747  | -1.42000 | -0.34197 |
| C | 1.64784  | -0.31156 | 0.39808  |
| C | -0.19806 | -2.37223 | -0.31780 |
| C | 1.29432  | -2.69100 | -0.49207 |
| H | -0.78007 | -3.30043 | -0.29270 |
| H | -0.54756 | -1.80564 | -1.18614 |
| H | 1.48159  | -3.15220 | -1.46892 |
| H | 1.61680  | -3.41983 | 0.26676  |
| C | 0.40803  | -0.32088 | 1.14456  |
| O | 0.08236  | 0.56885  | 1.93898  |
| C | -0.49265 | -1.56182 | 0.95758  |
| C | -1.99022 | -1.22077 | 1.08479  |
| H | -2.52648 | -2.14947 | 1.30473  |
| H | -2.11709 | -0.54658 | 1.94856  |
| C | -2.93868 | 1.35365  | -1.47604 |
| C | -2.02484 | 0.65503  | -0.48178 |
| N | -2.56380 | -0.66878 | -0.14155 |
| C | -4.03833 | -0.67957 | -0.16572 |
| C | -4.63378 | 0.70230  | 0.08470  |
| O | -4.22623 | 1.63869  | -0.91880 |
| H | -3.04671 | 0.73272  | -2.37848 |
| H | -2.50581 | 2.31276  | -1.77674 |
| H | -1.90999 | 1.29395  | 0.40937  |
| H | -1.02471 | 0.54756  | -0.92051 |
| H | -4.39141 | -1.03990 | -1.14207 |
| H | -4.41191 | -1.37996 | 0.58729  |
| H | -5.72799 | 0.66510  | 0.05622  |
| H | -4.33387 | 1.06387  | 1.08025  |
| C | 2.65347  | 2.06175  | 0.91227  |
| H | 2.37099  | 1.98845  | 1.96810  |
| H | 3.65444  | 2.50792  | 0.87914  |
| C | 1.65600  | 2.99004  | 0.20008  |
| H | 0.64370  | 2.58017  | 0.26822  |

|   |          |          |          |
|---|----------|----------|----------|
| H | 1.65267  | 3.98707  | 0.65614  |
| H | 1.91307  | 3.09888  | -0.85972 |
| C | 3.68362  | 0.15018  | -0.48049 |
| C | 4.98678  | 0.70383  | -0.95501 |
| H | 5.82895  | 0.05838  | -0.67486 |
| H | 5.00955  | 0.81519  | -2.04685 |
| H | 5.16213  | 1.68966  | -0.51770 |
| H | -0.25494 | -2.19572 | 1.82731  |

4s\_Renantiomer\_conformer-093

|   |          |          |          |
|---|----------|----------|----------|
| C | 3.04297  | 0.64433  | -0.26648 |
| N | 3.59773  | -1.36056 | 0.56741  |
| H | 4.16288  | -2.12075 | 0.92122  |
| C | 2.25905  | -1.42040 | 0.35806  |
| C | 1.86351  | -0.18702 | -0.15801 |
| C | 0.09977  | -2.43098 | -0.23490 |
| C | 1.36309  | -2.58078 | 0.62637  |
| H | 0.35170  | -2.63174 | -1.28457 |
| H | -0.64329 | -3.17668 | 0.06702  |
| H | 1.86832  | -3.53051 | 0.41503  |
| H | 1.08214  | -2.60415 | 1.69020  |
| C | 0.48116  | 0.08618  | -0.49056 |
| O | 0.09908  | 1.14897  | -0.99360 |
| C | -0.52562 | -1.02443 | -0.12859 |
| C | -1.83874 | -0.92414 | -0.92863 |
| H | -1.67607 | -0.33044 | -1.84448 |
| H | -2.13285 | -1.93021 | -1.24979 |
| C | -3.88310 | 1.30676  | 1.30803  |
| C | -2.84543 | 1.00905  | 0.21468  |
| N | -2.95393 | -0.40185 | -0.14069 |
| C | -4.23463 | -0.64763 | -0.81439 |
| C | -5.33267 | 0.25220  | -0.21504 |
| O | -5.07296 | 0.52684  | 1.15368  |
| H | -4.13066 | 2.37997  | 1.30910  |
| H | -3.48357 | 1.04354  | 2.29250  |
| H | -1.84416 | 1.22266  | 0.59202  |
| H | -2.99001 | 1.66774  | -0.66217 |
| H | -4.17555 | -0.44557 | -1.90123 |
| H | -4.48866 | -1.70808 | -0.69434 |
| H | -5.41215 | 1.19191  | -0.78233 |
| H | -6.30564 | -0.24399 | -0.25960 |
| C | 3.08769  | 2.06760  | -0.74232 |
| H | 4.12085  | 2.34324  | -0.98505 |
| H | 2.50757  | 2.15792  | -1.66714 |
| C | 2.52391  | 3.05722  | 0.29002  |

|   |          |          |          |
|---|----------|----------|----------|
| H | 3.08643  | 3.00414  | 1.22913  |
| H | 2.57680  | 4.08672  | -0.08348 |
| H | 1.47623  | 2.82327  | 0.50102  |
| C | 4.09930  | -0.11103 | 0.19438  |
| C | 5.55411  | 0.19497  | 0.33484  |
| H | 5.87674  | 0.17139  | 1.38373  |
| H | 6.17578  | -0.52349 | -0.21452 |
| H | 5.77152  | 1.19184  | -0.05612 |
| H | -0.77623 | -0.85984 | 0.93145  |

4s\_Renantiomer\_conformer-094

|   |          |          |          |
|---|----------|----------|----------|
| C | 2.65617  | -0.68535 | 0.18789  |
| N | 3.13037  | 1.41621  | 0.80593  |
| H | 3.61925  | 2.20001  | 1.21732  |
| C | 1.93277  | 1.49314  | 0.17384  |
| C | 1.59530  | 0.20323  | -0.23526 |
| C | -0.34570 | 2.30489  | -0.21970 |
| C | 1.12554  | 2.72117  | -0.07389 |
| H | -0.73058 | 1.99602  | 0.75690  |
| H | -0.94843 | 3.16289  | -0.53796 |
| H | 1.24485  | 3.44558  | 0.74042  |
| H | 1.46879  | 3.22125  | -0.99216 |
| C | 0.38429  | -0.05841 | -0.98342 |
| O | 0.10723  | -1.16060 | -1.47054 |
| C | -0.54359 | 1.15347  | -1.22198 |
| C | -2.02510 | 0.74971  | -1.34635 |
| H | -2.54591 | 1.55425  | -1.87532 |
| H | -2.08454 | -0.15723 | -1.97150 |
| C | -4.73784 | -0.83892 | -0.01060 |
| C | -4.16059 | 0.56713  | -0.13891 |
| N | -2.68856 | 0.58034  | -0.05463 |
| C | -2.17736 | -0.56799 | 0.70611  |
| C | -3.16679 | -0.95919 | 1.79262  |
| O | -4.40599 | -1.42885 | 1.25120  |
| H | -4.36562 | -1.47206 | -0.83059 |
| H | -5.83118 | -0.81767 | -0.07196 |
| H | -4.58417 | 1.19247  | 0.65939  |
| H | -4.47668 | 1.00629  | -1.08986 |
| H | -1.99222 | -1.44060 | 0.05842  |
| H | -1.21504 | -0.30949 | 1.16629  |
| H | -2.75942 | -1.77385 | 2.39919  |
| H | -3.34585 | -0.09958 | 2.45648  |
| C | 2.73098  | -2.16525 | -0.05524 |
| H | 3.43312  | -2.62064 | 0.65355  |
| H | 1.74975  | -2.61261 | 0.13777  |



|   |          |          |          |
|---|----------|----------|----------|
| C | 3.15679  | -2.51306 | -1.49055 |
| H | 4.14279  | -2.09190 | -1.71795 |
| H | 3.20726  | -3.59914 | -1.63277 |
| H | 2.43313  | -2.10638 | -2.20279 |
| C | 3.59033  | 0.09711  | 0.83130  |
| C | 4.88859  | -0.24255 | 1.48632  |
| H | 5.73770  | 0.23783  | 0.98318  |
| H | 4.90969  | 0.07389  | 2.53698  |
| H | 5.05549  | -1.32206 | 1.45906  |
| H | -0.24743 | 1.51758  | -2.21956 |

4s\_Renantiomer\_conformer-095

|   |          |          |          |
|---|----------|----------|----------|
| C | -3.23574 | 0.33575  | 0.00076  |
| N | -2.85872 | -1.86287 | 0.21140  |
| H | -3.02226 | -2.84268 | 0.40042  |
| C | -1.70346 | -1.35119 | -0.28235 |
| C | -1.88857 | 0.02521  | -0.42565 |
| C | 0.37473  | -1.28278 | -1.59953 |
| C | -0.46304 | -2.11200 | -0.61061 |
| H | 1.36986  | -1.72328 | -1.70343 |
| H | -0.10970 | -1.31266 | -2.58291 |
| H | 0.11600  | -2.30799 | 0.30339  |
| H | -0.70351 | -3.09246 | -1.03828 |
| C | -0.82752 | 0.87899  | -0.91647 |
| O | -0.93267 | 2.10038  | -1.07800 |
| C | 0.51979  | 0.18607  | -1.16606 |
| C | 1.36445  | 0.34406  | 0.11927  |
| H | 1.41678  | 1.41799  | 0.37584  |
| H | 0.84263  | -0.14762 | 0.94811  |
| C | 4.72386  | 1.16679  | -0.03703 |
| C | 3.62724  | 0.48148  | -0.84666 |
| N | 2.68391  | -0.26532 | 0.01121  |
| C | 3.25402  | -0.56522 | 1.32894  |
| C | 4.73296  | -0.89010 | 1.18913  |
| O | 5.49270  | 0.23033  | 0.72197  |
| H | 4.27875  | 1.92024  | 0.63058  |
| H | 5.42516  | 1.68229  | -0.70095 |
| H | 4.09149  | -0.20003 | -1.57176 |
| H | 3.08656  | 1.23943  | -1.42216 |
| H | 3.14064  | 0.27417  | 2.03965  |
| H | 2.72771  | -1.42457 | 1.76194  |
| H | 5.15247  | -1.18024 | 2.15768  |
| H | 4.85385  | -1.73720 | 0.49690  |
| C | -3.85795 | 1.70107  | 0.05215  |
| H | -3.64390 | 2.23116  | -0.88233 |

|   |          |          |          |
|---|----------|----------|----------|
| H | -4.94819 | 1.60805  | 0.12390  |
| C | -3.33853 | 2.54546  | 1.22700  |
| H | -3.81242 | 3.53411  | 1.23998  |
| H | -3.54713 | 2.05289  | 2.18355  |
| H | -2.25706 | 2.68508  | 1.13892  |
| C | -3.80873 | -0.85448 | 0.39222  |
| C | -5.16379 | -1.17590 | 0.93115  |
| H | -5.79176 | -0.28170 | 0.93633  |
| H | -5.67110 | -1.93878 | 0.32697  |
| H | -5.11467 | -1.55377 | 1.96060  |
| H | 1.00498  | 0.74986  | -1.97063 |

4s\_Renantiomer\_conformer-096

|   |          |          |          |
|---|----------|----------|----------|
| C | -3.01183 | -0.67955 | 0.24536  |
| N | -3.53227 | 1.48689  | 0.48683  |
| H | -4.07937 | 2.32222  | 0.64618  |
| C | -2.20968 | 1.47008  | 0.18678  |
| C | -1.83676 | 0.13623  | 0.02620  |
| C | -0.08282 | 2.24061  | -0.77155 |
| C | -1.30559 | 2.64867  | 0.06406  |
| H | -0.38292 | 2.12892  | -1.82180 |
| H | 0.67147  | 3.03370  | -0.73389 |
| H | -1.82274 | 3.50092  | -0.39227 |
| H | -0.97607 | 2.97835  | 1.06104  |
| C | -0.46901 | -0.23728 | -0.26744 |
| O | -0.10631 | -1.40468 | -0.45205 |
| C | 0.55026  | 0.91967  | -0.28661 |
| C | 1.82743  | 0.57654  | -1.07774 |
| H | 1.62975  | -0.26477 | -1.76379 |
| H | 2.09865  | 1.43763  | -1.69962 |
| C | 3.98551  | -0.89216 | 1.63193  |
| C | 2.89964  | -0.93027 | 0.54551  |
| N | 2.98033  | 0.30960  | -0.21928 |
| C | 4.22902  | 0.33760  | -0.99040 |
| C | 5.35915  | -0.34878 | -0.19905 |
| O | 5.16199  | -0.20147 | 1.19947  |
| H | 4.24083  | -1.91694 | 1.94440  |
| H | 3.62648  | -0.34322 | 2.50821  |
| H | 1.91726  | -1.01689 | 1.01266  |
| H | 3.01264  | -1.82146 | -0.09998 |
| H | 4.12515  | -0.17822 | -1.96438 |
| H | 4.47926  | 1.38453  | -1.20208 |
| H | 5.42109  | -1.41528 | -0.46338 |
| H | 6.32529  | 0.10617  | -0.43246 |
| C | -3.08915 | -2.17559 | 0.14537  |

|   |          |          |          |
|---|----------|----------|----------|
| H | -2.23571 | -2.61767 | 0.67123  |
| H | -3.99456 | -2.53269 | 0.65048  |
| C | -3.08370 | -2.67564 | -1.30807 |
| H | -3.14513 | -3.76967 | -1.34710 |
| H | -3.93334 | -2.26486 | -1.86534 |
| H | -2.16068 | -2.36598 | -1.80688 |
| C | -4.04487 | 0.18785  | 0.52673  |
| C | -5.48873 | -0.04965 | 0.82450  |
| H | -5.78314 | 0.38676  | 1.78741  |
| H | -6.14056 | 0.38497  | 0.05562  |
| H | -5.69567 | -1.12171 | 0.86633  |
| H | 0.84698  | 1.06892  | 0.76364  |

4s\_Renantiomer\_conformer-097

|   |          |          |          |
|---|----------|----------|----------|
| C | -2.41600 | -0.49765 | -0.28829 |
| N | -2.05833 | 1.42093  | -1.38857 |
| H | -2.15547 | 2.15612  | -2.07585 |
| C | -1.18085 | 1.43846  | -0.35461 |
| C | -1.36821 | 0.25783  | 0.36603  |
| C | 0.27511  | 2.36718  | 1.39817  |
| C | -0.18204 | 2.50536  | -0.06506 |
| H | 1.15534  | 2.99691  | 1.57314  |
| H | -0.52333 | 2.75144  | 2.04506  |
| H | 0.67460  | 2.39680  | -0.73875 |
| H | -0.61126 | 3.50068  | -0.23616 |
| C | -0.53367 | -0.07371 | 1.49699  |
| O | -0.63330 | -1.12091 | 2.15149  |
| C | 0.58554  | 0.92083  | 1.83182  |
| C | 1.93832  | 0.38572  | 1.30066  |
| H | 2.71839  | 1.08428  | 1.62197  |
| H | 2.14470  | -0.56874 | 1.80671  |
| C | 4.38874  | -0.19471 | -0.66065 |
| C | 3.20947  | 0.77018  | -0.78841 |
| N | 1.98771  | 0.25895  | -0.16001 |
| C | 1.70298  | -1.09402 | -0.65771 |
| C | 2.91210  | -2.02349 | -0.53970 |
| O | 4.05056  | -1.47149 | -1.20357 |
| H | 4.68156  | -0.30383 | 0.39706  |
| H | 5.25674  | 0.16204  | -1.22402 |
| H | 3.00173  | 0.92318  | -1.85620 |
| H | 3.45874  | 1.74470  | -0.35574 |
| H | 0.85142  | -1.51140 | -0.11557 |
| H | 1.41789  | -1.01553 | -1.71495 |
| H | 3.15534  | -2.20590 | 0.51994  |
| H | 2.71322  | -2.98874 | -1.01555 |

|   |          |          |          |
|---|----------|----------|----------|
| C | -2.96440 | -1.82296 | 0.15477  |
| H | -3.53393 | -2.27905 | -0.66380 |
| H | -2.13348 | -2.50042 | 0.38124  |
| C | -3.85811 | -1.71200 | 1.40020  |
| H | -4.71007 | -1.04873 | 1.21178  |
| H | -4.24699 | -2.69432 | 1.69357  |
| H | -3.28321 | -1.30689 | 2.23815  |
| C | -2.82412 | 0.25142  | -1.36951 |
| C | -3.86906 | 0.01266  | -2.40916 |
| H | -4.33393 | -0.96522 | -2.26223 |
| H | -4.66440 | 0.76827  | -2.36940 |
| H | -3.44805 | 0.03484  | -3.42250 |
| H | 0.67605  | 0.90282  | 2.92550  |

4s\_Renantiomer\_conformer-098

|   |          |          |          |
|---|----------|----------|----------|
| C | 2.73319  | 0.61491  | -0.22788 |
| N | 3.25581  | -1.38907 | 0.62917  |
| H | 3.80513  | -2.14317 | 1.01909  |
| C | 1.94343  | -1.47523 | 0.29636  |
| C | 1.56876  | -0.24370 | -0.23824 |
| C | -0.13813 | -2.51303 | -0.50032 |
| C | 1.05525  | -2.66166 | 0.45685  |
| H | 0.19969  | -2.68397 | -1.53112 |
| H | -0.88724 | -3.28008 | -0.27592 |
| H | 1.59855  | -3.59400 | 0.26260  |
| H | 0.68828  | -2.72216 | 1.49275  |
| C | 0.21883  | -0.00174 | -0.70496 |
| O | -0.12023 | 1.03743  | -1.28344 |
| C | -0.79625 | -1.11967 | -0.40632 |
| C | -2.06723 | -1.03353 | -1.29790 |
| H | -1.77496 | -0.62937 | -2.27292 |
| H | -2.41133 | -2.06158 | -1.47002 |
| C | -3.59854 | -0.14622 | 1.62950  |
| C | -3.97328 | -0.80563 | 0.29631  |
| N | -3.23128 | -0.28608 | -0.84782 |
| C | -3.18865 | 1.17263  | -0.85273 |
| C | -2.80587 | 1.76206  | 0.50559  |
| O | -3.67525 | 1.27464  | 1.53253  |
| H | -2.58593 | -0.44111 | 1.94689  |
| H | -4.30180 | -0.44115 | 2.41533  |
| H | -5.04554 | -0.61785 | 0.12882  |
| H | -3.83340 | -1.89044 | 0.35920  |
| H | -2.48324 | 1.50770  | -1.61399 |
| H | -4.19214 | 1.54737  | -1.10943 |
| H | -1.76218 | 1.51642  | 0.74955  |

|   |          |          |          |
|---|----------|----------|----------|
| H | -2.91537 | 2.85152  | 0.50471  |
| C | 2.78526  | 2.04721  | -0.67530 |
| H | 3.82950  | 2.35611  | -0.80330 |
| H | 2.30274  | 2.13819  | -1.65436 |
| C | 2.08727  | 3.00256  | 0.30627  |
| H | 2.55004  | 2.94920  | 1.29832  |
| H | 2.14833  | 4.03937  | -0.04501 |
| H | 1.03028  | 2.73717  | 0.40435  |
| C | 3.75976  | -0.12296 | 0.32071  |
| C | 5.18684  | 0.21468  | 0.60237  |
| H | 5.41493  | 1.22295  | 0.24850  |
| H | 5.41015  | 0.18063  | 1.67652  |
| H | 5.87535  | -0.47911 | 0.10323  |
| H | -1.09152 | -0.97727 | 0.64219  |

4s\_Renantiomer\_conformer-099

|   |          |          |          |
|---|----------|----------|----------|
| C | 3.12834  | 0.32916  | -0.11518 |
| N | 2.92751  | -1.85965 | 0.32191  |
| H | 3.18128  | -2.81386 | 0.53960  |
| C | 1.67005  | -1.43600 | 0.04162  |
| C | 1.74252  | -0.07100 | -0.23325 |
| C | -0.60683 | -1.55510 | -0.85910 |
| C | 0.43091  | -2.26353 | 0.02404  |
| H | -0.29092 | -1.62038 | -1.90858 |
| H | -1.56539 | -2.07646 | -0.78552 |
| H | 0.63404  | -3.27520 | -0.34646 |
| H | 0.03268  | -2.37602 | 1.04393  |
| C | 0.55966  | 0.70072  | -0.55309 |
| O | 0.58528  | 1.91028  | -0.80583 |
| C | -0.78174 | -0.06936 | -0.49259 |
| C | -1.86864 | 0.63736  | -1.34559 |
| H | -1.55903 | 1.67953  | -1.45950 |
| H | -1.85614 | 0.19020  | -2.34933 |
| C | -4.00115 | -1.24789 | 0.54590  |
| C | -4.00034 | -0.59627 | -0.84059 |
| N | -3.25099 | 0.65389  | -0.89157 |
| C | -3.59234 | 1.53647  | 0.22016  |
| C | -3.62317 | 0.83056  | 1.58028  |
| O | -4.46290 | -0.32324 | 1.53165  |
| H | -2.99512 | -1.60370 | 0.81764  |
| H | -4.68847 | -2.09932 | 0.57585  |
| H | -5.04910 | -0.38417 | -1.10099 |
| H | -3.60780 | -1.28752 | -1.59342 |
| H | -2.88823 | 2.37469  | 0.24569  |
| H | -4.59760 | 1.94879  | 0.04109  |

|   |          |          |          |
|---|----------|----------|----------|
| H | -2.61016 | 0.53753  | 1.89760  |
| H | -4.04615 | 1.48724  | 2.34718  |
| C | 3.67339  | 1.71721  | -0.29026 |
| H | 4.75731  | 1.67055  | -0.44980 |
| H | 3.23750  | 2.16619  | -1.18929 |
| C | 3.37330  | 2.62941  | 0.91008  |
| H | 2.29223  | 2.72384  | 1.04896  |
| H | 3.80565  | 2.21886  | 1.82970  |
| H | 3.78810  | 3.63235  | 0.75439  |
| C | 3.83527  | -0.80162 | 0.23225  |
| C | 5.28756  | -1.02374 | 0.49965  |
| H | 5.85154  | -0.10587 | 0.31691  |
| H | 5.46995  | -1.32455 | 1.53944  |
| H | 5.70460  | -1.80770 | -0.14528 |
| H | -1.07614 | -0.00933 | 0.56527  |

4s\_Renantiomer\_conformer-100

|   |          |          |          |
|---|----------|----------|----------|
| C | -3.37978 | -0.32734 | -0.19413 |
| N | -3.17212 | 1.89747  | -0.02292 |
| H | -3.42198 | 2.87659  | 0.01309  |
| C | -1.90300 | 1.41924  | 0.00076  |
| C | -1.98094 | 0.03017  | -0.09750 |
| C | 0.50674  | 1.38227  | -0.46441 |
| C | -0.64811 | 2.21725  | 0.10818  |
| H | 0.39663  | 1.31471  | -1.55515 |
| H | 1.46615  | 1.86784  | -0.26921 |
| H | -0.74000 | 3.17321  | -0.42081 |
| H | -0.44189 | 2.46029  | 1.16169  |
| C | -0.79074 | -0.79544 | -0.09029 |
| O | -0.80861 | -2.02635 | -0.20303 |
| C | 0.53749  | -0.04167 | 0.11767  |
| C | 1.70972  | -0.86406 | -0.43190 |
| H | 1.68645  | -1.87528 | 0.00771  |
| H | 1.56370  | -0.99218 | -1.51195 |
| C | 4.65752  | 0.78475  | 1.22784  |
| C | 3.46473  | -0.18150 | 1.13733  |
| N | 3.00681  | -0.22049 | -0.24605 |
| C | 4.02863  | -0.84373 | -1.09722 |
| C | 5.43814  | -0.49737 | -0.58205 |
| O | 5.45093  | 0.77981  | 0.03864  |
| H | 5.27881  | 0.53174  | 2.10112  |
| H | 4.30298  | 1.81373  | 1.34227  |
| H | 2.66584  | 0.18820  | 1.78537  |
| H | 3.73581  | -1.18755 | 1.51103  |
| H | 3.92853  | -1.94554 | -1.11979 |

|   |          |          |          |
|---|----------|----------|----------|
| H | 3.88741  | -0.48257 | -2.12304 |
| H | 5.79085  | -1.26538 | 0.12280  |
| H | 6.15135  | -0.45529 | -1.40921 |
| C | -3.93976 | -1.71751 | -0.28588 |
| H | -4.97549 | -1.67521 | -0.64354 |
| H | -3.36955 | -2.28852 | -1.02663 |
| C | -3.89332 | -2.46762 | 1.05496  |
| H | -4.31388 | -3.47535 | 0.95596  |
| H | -2.85852 | -2.56078 | 1.39756  |
| H | -4.46457 | -1.93191 | 1.82170  |
| C | -4.09097 | 0.85189  | -0.14145 |
| C | -5.55711 | 1.13189  | -0.18763 |
| H | -5.91564 | 1.58511  | 0.74560  |
| H | -5.81486 | 1.81834  | -1.00425 |
| H | -6.11559 | 0.20541  | -0.34159 |
| H | 0.64079  | 0.04652  | 1.21157  |

#### 4s\_Renantiomer\_conformer-101

|   |          |          |          |
|---|----------|----------|----------|
| C | 2.88642  | 0.62860  | 0.20395  |
| N | 3.33018  | -1.35143 | -0.74780 |
| H | 3.82614  | -2.07742 | -1.24717 |
| C | 2.07201  | -1.46829 | -0.25620 |
| C | 1.74794  | -0.25356 | 0.34834  |
| C | -0.26360 | -2.21205 | -0.17286 |
| C | 1.19480  | -2.67190 | -0.31744 |
| H | -0.57062 | -1.68786 | -1.08326 |
| H | -0.92330 | -3.08069 | -0.07046 |
| H | 1.33998  | -3.22037 | -1.25571 |
| H | 1.45085  | -3.36792 | 0.49590  |
| C | 0.48373  | -0.06006 | 1.02389  |
| O | 0.17903  | 0.98329  | 1.61568  |
| C | -0.46474 | -1.27803 | 1.03384  |
| C | -1.94410 | -0.90677 | 1.24401  |
| H | -2.44554 | -1.78796 | 1.65921  |
| H | -2.00742 | -0.11077 | 2.00459  |
| C | -4.84850 | -0.05770 | -0.95872 |
| C | -4.10837 | -0.73640 | 0.18335  |
| N | -2.66166 | -0.56520 | 0.01694  |
| C | -2.32582 | 0.74964  | -0.56812 |
| C | -3.43414 | 1.77632  | -0.35853 |
| O | -4.67050 | 1.36234  | -0.94885 |
| H | -5.92425 | -0.24398 | -0.88002 |
| H | -4.50008 | -0.47417 | -1.91639 |
| H | -4.34912 | -1.80699 | 0.19441  |
| H | -4.47556 | -0.31518 | 1.13821  |

|   |          |          |          |
|---|----------|----------|----------|
| H | -1.40867 | 1.13179  | -0.11917 |
| H | -2.14403 | 0.63913  | -1.64615 |
| H | -3.57404 | 1.95744  | 0.71827  |
| H | -3.16704 | 2.73044  | -0.82498 |
| C | 2.97458  | 2.05201  | 0.67337  |
| H | 2.61697  | 2.11506  | 1.70692  |
| H | 4.02266  | 2.37420  | 0.67803  |
| C | 2.14812  | 3.01689  | -0.19191 |
| H | 1.09075  | 2.73748  | -0.16267 |
| H | 2.24015  | 4.04701  | 0.17211  |
| H | 2.48364  | 2.99101  | -1.23493 |
| C | 3.84721  | -0.08018 | -0.48357 |
| C | 5.21642  | 0.29262  | -0.94849 |
| H | 5.29340  | 0.27710  | -2.04338 |
| H | 5.46922  | 1.30127  | -0.61302 |
| H | 5.97984  | -0.39193 | -0.55739 |
| H | -0.16344 | -1.83221 | 1.93892  |

4s\_Renantiomer\_conformer-102

|   |          |          |          |
|---|----------|----------|----------|
| C | -2.27092 | -0.98729 | 0.37480  |
| N | -3.23445 | 0.57181  | -0.91331 |
| H | -3.90012 | 1.01816  | -1.52956 |
| C | -2.15692 | 1.18521  | -0.35753 |
| C | -1.52351 | 0.24620  | 0.45537  |
| C | -0.70647 | 3.00237  | 0.49967  |
| C | -1.73459 | 2.60022  | -0.57794 |
| H | -0.19484 | 3.92241  | 0.19546  |
| H | -1.23980 | 3.22647  | 1.43081  |
| H | -1.30074 | 2.70981  | -1.58168 |
| H | -2.59577 | 3.27847  | -0.54611 |
| C | -0.33958 | 0.58979  | 1.21632  |
| O | 0.12723  | -0.10074 | 2.12733  |
| C | 0.33393  | 1.89944  | 0.79117  |
| C | 1.22619  | 1.64310  | -0.44331 |
| H | 0.59058  | 1.54290  | -1.32882 |
| H | 1.86390  | 2.53446  | -0.60530 |
| C | 3.75860  | -0.88054 | 0.75606  |
| C | 3.01559  | 0.44924  | 0.70914  |
| N | 2.01282  | 0.41800  | -0.35627 |
| C | 2.64792  | 0.09916  | -1.63387 |
| C | 3.38885  | -1.22814 | -1.52657 |
| O | 4.36943  | -1.18948 | -0.49411 |
| H | 3.05388  | -1.68018 | 1.03484  |
| H | 4.56288  | -0.84614 | 1.49623  |
| H | 3.74119  | 1.27159  | 0.55430  |



|   |          |          |          |
|---|----------|----------|----------|
| H | 2.51400  | 0.60393  | 1.66700  |
| H | 1.87522  | 0.02582  | -2.40800 |
| H | 3.36154  | 0.88765  | -1.94357 |
| H | 2.66607  | -2.03558 | -1.32691 |
| H | 3.92022  | -1.45124 | -2.45603 |
| C | -1.88768 | -2.28312 | 1.02828  |
| H | -1.67525 | -2.10590 | 2.08804  |
| H | -2.72600 | -2.98830 | 0.98192  |
| C | -0.64650 | -2.91592 | 0.37537  |
| H | 0.20054  | -2.22416 | 0.41962  |
| H | -0.36178 | -3.84341 | 0.88608  |
| H | -0.83966 | -3.15039 | -0.67784 |
| C | -3.32094 | -0.75560 | -0.48715 |
| C | -4.41432 | -1.64351 | -0.98323 |
| H | -5.40632 | -1.22574 | -0.76896 |
| H | -4.35320 | -1.80034 | -2.06793 |
| H | -4.35419 | -2.62289 | -0.50233 |
| H | 0.95779  | 2.22201  | 1.63053  |

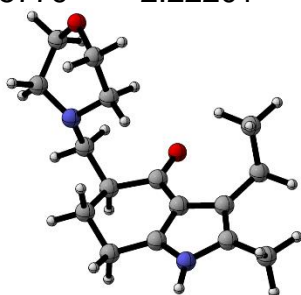

4s\_Senantiomer\_conformer-001

|   |          |          |          |
|---|----------|----------|----------|
| C | -2.69152 | 0.68690  | 0.31116  |
| N | -3.27811 | -1.13279 | -0.85846 |
| H | -3.81972 | -1.75518 | -1.44303 |
| C | -2.05749 | -1.41998 | -0.34196 |
| C | -1.64780 | -0.31157 | 0.39812  |
| C | 0.19797  | -2.37235 | -0.31778 |
| C | -1.29443 | -2.69104 | -0.49201 |
| H | 0.54746  | -1.80579 | -1.18614 |
| H | 0.77993  | -3.30058 | -0.29268 |
| H | -1.61695 | -3.41982 | 0.26686  |
| H | -1.48174 | -3.15227 | -1.46883 |
| C | -0.40801 | -0.32097 | 1.14462  |
| O | -0.08233 | 0.56873  | 1.93906  |
| C | 0.49266  | -1.56192 | 0.95757  |
| H | 0.25502  | -2.19580 | 1.82734  |
| C | 1.99024  | -1.22086 | 1.08466  |
| H | 2.11716  | -0.54665 | 1.94840  |
| H | 2.52652  | -2.14956 | 1.30457  |

|   |          |          |          |
|---|----------|----------|----------|
| C | 2.93851  | 1.35386  | -1.47597 |
| C | 2.02466  | 0.65494  | -0.48190 |
| N | 2.56371  | -0.66888 | -0.14173 |
| C | 4.03823  | -0.67959 | -0.16593 |
| C | 4.63351  | 0.70229  | 0.08479  |
| O | 4.22609  | 1.63873  | -0.91870 |
| H | 2.50559  | 2.31304  | -1.77637 |
| H | 3.04653  | 0.73320  | -2.37859 |
| H | 1.02460  | 0.54743  | -0.92075 |
| H | 1.90963  | 1.29370  | 0.40933  |
| H | 4.41182  | -1.38011 | 0.58695  |
| H | 4.39135  | -1.03970 | -1.14235 |
| H | 4.33334  | 1.06369  | 1.08032  |
| H | 5.72774  | 0.66523  | 0.05654  |
| C | -2.65327 | 2.06181  | 0.91229  |
| H | -3.65416 | 2.50811  | 0.87898  |
| H | -2.37096 | 1.98847  | 1.96816  |
| C | -1.65552 | 2.98994  | 0.20027  |
| H | -1.91239 | 3.09884  | -0.85957 |
| H | -0.64330 | 2.57990  | 0.26856  |
| H | -1.65209 | 3.98696  | 0.65635  |
| C | -3.68351 | 0.15032  | -0.48053 |
| C | -4.98665 | 0.70406  | -0.95506 |
| H | -5.00971 | 0.81454  | -2.04698 |
| H | -5.82897 | 0.05914  | -0.67413 |
| H | -5.16153 | 1.69031  | -0.51849 |

4s\_Senantiomer\_conformer-002

|   |          |          |          |
|---|----------|----------|----------|
| C | -2.65617 | -0.68535 | 0.18789  |
| N | -3.13037 | 1.41621  | 0.80593  |
| H | -3.61925 | 2.20000  | 1.21732  |
| C | -1.93277 | 1.49314  | 0.17384  |
| C | -1.59530 | 0.20323  | -0.23526 |
| C | 0.34570  | 2.30489  | -0.21970 |
| C | -1.12554 | 2.72117  | -0.07389 |
| H | 0.73058  | 1.99603  | 0.75690  |
| H | 0.94843  | 3.16289  | -0.53796 |
| H | -1.46879 | 3.22125  | -0.99216 |
| H | -1.24485 | 3.44557  | 0.74043  |
| C | -0.38429 | -0.05840 | -0.98342 |
| O | -0.10723 | -1.16060 | -1.47054 |
| C | 0.54359  | 1.15348  | -1.22198 |
| H | 0.24743  | 1.51759  | -2.21956 |
| C | 2.02510  | 0.74971  | -1.34634 |
| H | 2.08454  | -0.15722 | -1.97150 |

|   |          |          |          |
|---|----------|----------|----------|
| H | 2.54591  | 1.55425  | -1.87532 |
| C | 3.16679  | -0.95919 | 1.79262  |
| C | 2.17736  | -0.56799 | 0.70611  |
| N | 2.68856  | 0.58034  | -0.05463 |
| C | 4.16059  | 0.56713  | -0.13891 |
| C | 4.73784  | -0.83892 | -0.01060 |
| O | 4.40599  | -1.42885 | 1.25120  |
| H | 2.75942  | -1.77386 | 2.39918  |
| H | 3.34585  | -0.09959 | 2.45648  |
| H | 1.21504  | -0.30949 | 1.16629  |
| H | 1.99222  | -1.44060 | 0.05842  |
| H | 4.47668  | 1.00630  | -1.08985 |
| H | 4.58416  | 1.19247  | 0.65940  |
| H | 4.36562  | -1.47205 | -0.83059 |
| H | 5.83118  | -0.81766 | -0.07196 |
| C | -2.73098 | -2.16526 | -0.05524 |
| H | -1.74974 | -2.61261 | 0.13777  |
| H | -3.43312 | -2.62064 | 0.65354  |
| C | -3.15678 | -2.51306 | -1.49055 |
| H | -2.43312 | -2.10637 | -2.20279 |
| H | -4.14278 | -2.09190 | -1.71795 |
| H | -3.20725 | -3.59914 | -1.63277 |
| C | -3.59033 | 0.09711  | 0.83130  |
| C | -4.88859 | -0.24255 | 1.48631  |
| H | -4.90970 | 0.07391  | 2.53697  |
| H | -5.73771 | 0.23781  | 0.98317  |
| H | -5.05548 | -1.32207 | 1.45907  |

4s\_Senantiomer\_conformer-003

|   |          |          |          |
|---|----------|----------|----------|
| C | 3.23575  | 0.33572  | 0.00076  |
| N | 2.85867  | -1.86289 | 0.21136  |
| H | 3.02219  | -2.84272 | 0.40035  |
| C | 1.70342  | -1.35118 | -0.28238 |
| C | 1.88857  | 0.02522  | -0.42565 |
| C | -0.37476 | -1.28270 | -1.59956 |
| C | 0.46299  | -2.11195 | -0.61066 |
| H | -1.36990 | -1.72317 | -1.70347 |
| H | 0.10967  | -1.31256 | -2.58294 |
| H | 0.70344  | -3.09240 | -1.03835 |
| H | -0.11605 | -2.30795 | 0.30334  |
| C | 0.82753  | 0.87904  | -0.91645 |
| O | 0.93271  | 2.10043  | -1.07795 |
| C | -0.51979 | 0.18615  | -1.16605 |
| H | -1.00496 | 0.74996  | -1.97061 |
| C | -1.36445 | 0.34413  | 0.11928  |

|   |          |          |          |
|---|----------|----------|----------|
| H | -1.41677 | 1.41805  | 0.37586  |
| H | -0.84263 | -0.14756 | 0.94812  |
| C | -4.72393 | 1.16675  | -0.03698 |
| C | -3.62725 | 0.48156  | -0.84663 |
| N | -2.68391 | -0.26525 | 0.01122  |
| C | -3.25401 | -0.56517 | 1.32895  |
| C | -4.73292 | -0.89017 | 1.18911  |
| O | -5.49274 | 0.23019  | 0.72192  |
| H | -5.42525 | 1.68226  | -0.70088 |
| H | -4.27888 | 1.92018  | 0.63070  |
| H | -3.08660 | 1.23957  | -1.42206 |
| H | -4.09145 | -0.19993 | -1.57179 |
| H | -2.72764 | -1.42448 | 1.76196  |
| H | -3.14070 | 0.27424  | 2.03965  |
| H | -4.85372 | -1.73729 | 0.49689  |
| H | -5.15242 | -1.18035 | 2.15765  |
| C | 3.85800  | 1.70103  | 0.05216  |
| H | 4.94824  | 1.60797  | 0.12386  |
| H | 3.64392  | 2.23114  | -0.88229 |
| C | 3.33866  | 2.54540  | 1.22706  |
| H | 3.81258  | 3.53404  | 1.24005  |
| H | 2.25719  | 2.68505  | 1.13904  |
| H | 3.54730  | 2.05280  | 2.18359  |
| C | 3.80871  | -0.85453 | 0.39220  |
| C | 5.16377  | -1.17600 | 0.93111  |
| H | 5.67110  | -1.93879 | 0.32684  |
| H | 5.79172  | -0.28179 | 0.93641  |
| H | 5.11463  | -1.55400 | 1.96051  |

4s\_Senantiomer\_conformer-004

|   |          |          |          |
|---|----------|----------|----------|
| C | 3.01182  | -0.67956 | 0.24535  |
| N | 3.53228  | 1.48687  | 0.48684  |
| H | 4.07938  | 2.32221  | 0.64619  |
| C | 2.20969  | 1.47008  | 0.18679  |
| C | 1.83676  | 0.13623  | 0.02620  |
| C | 0.08283  | 2.24062  | -0.77155 |
| C | 1.30561  | 2.64867  | 0.06407  |
| H | 0.38293  | 2.12894  | -1.82180 |
| H | -0.67145 | 3.03373  | -0.73388 |
| H | 0.97608  | 2.97836  | 1.06105  |
| H | 1.82277  | 3.50092  | -0.39226 |
| C | 0.46900  | -0.23727 | -0.26746 |
| O | 0.10630  | -1.40467 | -0.45210 |
| C | -0.55026 | 0.91969  | -0.28661 |
| H | -0.84697 | 1.06893  | 0.76364  |

|   |          |          |          |
|---|----------|----------|----------|
| C | -1.82743 | 0.57658  | -1.07774 |
| H | -2.09866 | 1.43768  | -1.69960 |
| H | -1.62976 | -0.26472 | -1.76381 |
| C | -3.98548 | -0.89216 | 1.63193  |
| C | -2.89962 | -0.93026 | 0.54551  |
| N | -2.98032 | 0.30961  | -0.21927 |
| C | -4.22902 | 0.33761  | -0.99038 |
| C | -5.35914 | -0.34879 | -0.19904 |
| O | -5.16198 | -0.20150 | 1.19949  |
| H | -3.62644 | -0.34319 | 2.50820  |
| H | -4.24076 | -1.91694 | 1.94444  |
| H | -3.01263 | -1.82145 | -0.10000 |
| H | -1.91723 | -1.01689 | 1.01264  |
| H | -4.47928 | 1.38454  | -1.20204 |
| H | -4.12515 | -0.17820 | -1.96437 |
| H | -6.32528 | 0.10615  | -0.43244 |
| H | -5.42107 | -1.41529 | -0.46339 |
| C | 3.08913  | -2.17560 | 0.14536  |
| H | 3.99454  | -2.53270 | 0.65045  |
| H | 2.23570  | -2.61767 | 0.67125  |
| C | 3.08364  | -2.67564 | -1.30808 |
| H | 3.93327  | -2.26487 | -1.86537 |
| H | 2.16061  | -2.36598 | -1.80686 |
| H | 3.14505  | -3.76967 | -1.34711 |
| C | 4.04487  | 0.18783  | 0.52674  |
| C | 5.48872  | -0.04968 | 0.82451  |
| H | 6.14056  | 0.38495  | 0.05564  |
| H | 5.78313  | 0.38671  | 1.78743  |
| H | 5.69566  | -1.12174 | 0.86632  |

4s\_Senantiomer\_conformer-005

|   |          |          |          |
|---|----------|----------|----------|
| C | -3.15865 | 0.19751  | -0.44973 |
| N | -2.75632 | -1.93166 | 0.12100  |
| H | -2.89760 | -2.92386 | 0.25557  |
| C | -1.64319 | -1.24977 | 0.49019  |
| C | -1.84764 | 0.08934  | 0.15268  |
| C | 0.35665  | -0.68371 | 1.80981  |
| C | -0.41898 | -1.82123 | 1.12289  |
| H | 1.34793  | -1.03688 | 2.10602  |
| H | -0.18086 | -0.38949 | 2.71922  |
| H | -0.67753 | -2.60223 | 1.84758  |
| H | 0.21200  | -2.30342 | 0.36231  |
| C | -0.82064 | 1.08545  | 0.37280  |
| O | -0.94378 | 2.28555  | 0.10206  |
| C | 0.51607  | 0.55321  | 0.90902  |

|   |          |          |          |
|---|----------|----------|----------|
| H | 0.95156  | 1.36903  | 1.49688  |
| C | 1.43213  | 0.28498  | -0.30687 |
| H | 0.96366  | -0.47527 | -0.94205 |
| H | 1.49109  | 1.20670  | -0.91413 |
| C | 4.86882  | -1.13997 | -0.71675 |
| C | 3.39457  | -0.93566 | -1.02842 |
| N | 2.74817  | -0.21369 | 0.07305  |
| C | 3.63532  | 0.80976  | 0.66343  |
| C | 4.76112  | 1.21282  | -0.28408 |
| O | 5.58318  | 0.09875  | -0.64164 |
| H | 5.34499  | -1.73667 | -1.50117 |
| H | 4.96628  | -1.68575 | 0.23408  |
| H | 2.90638  | -1.90945 | -1.15683 |
| H | 3.30740  | -0.40110 | -1.99232 |
| H | 3.05426  | 1.70032  | 0.92257  |
| H | 4.07271  | 0.43063  | 1.59652  |
| H | 4.33904  | 1.67678  | -1.18860 |
| H | 5.41853  | 1.94751  | 0.19182  |
| C | -3.80915 | 1.45895  | -0.93899 |
| H | -3.08746 | 2.02929  | -1.53429 |
| H | -4.64504 | 1.20983  | -1.60350 |
| C | -4.31425 | 2.35096  | 0.20635  |
| H | -5.04776 | 1.81800  | 0.82203  |
| H | -4.78915 | 3.25909  | -0.18346 |
| H | -3.47784 | 2.64911  | 0.84543  |
| C | -3.69602 | -1.07117 | -0.45234 |
| C | -5.01240 | -1.59242 | -0.92708 |
| H | -4.89044 | -2.38778 | -1.67336 |
| H | -5.60843 | -2.00585 | -0.10318 |
| H | -5.59442 | -0.78979 | -1.38637 |

4s\_Senantiomer\_conformer-006

|   |          |          |          |
|---|----------|----------|----------|
| C | 2.41592  | -0.49777 | -0.28812 |
| N | 2.05824  | 1.42039  | -1.38913 |
| H | 2.15538  | 2.15530  | -2.07670 |
| C | 1.18084  | 1.43836  | -0.35511 |
| C | 1.36822  | 0.25803  | 0.36598  |
| C | -0.27504 | 2.36779  | 1.39737  |
| C | 0.18209  | 2.50543  | -0.06592 |
| H | -1.15524 | 2.99761  | 1.57212  |
| H | 0.52343  | 2.75227  | 2.04410  |
| H | 0.61137  | 3.50066  | -0.23739 |
| H | -0.67456 | 2.39669  | -0.73958 |
| C | 0.53372  | -0.07306 | 1.49711  |
| O | 0.63340  | -1.11998 | 2.15205  |

|   |          |          |          |
|---|----------|----------|----------|
| C | -0.58549 | 0.92161  | 1.83155  |
| H | -0.67602 | 0.90401  | 2.92523  |
| C | -1.93827 | 0.38631  | 1.30056  |
| H | -2.14475 | -0.56789 | 1.80708  |
| H | -2.71833 | 1.08507  | 1.62151  |
| C | -2.91204 | -2.02374 | -0.53886 |
| C | -1.70289 | -1.09434 | -0.65716 |
| N | -1.98764 | 0.25884  | -0.16004 |
| C | -3.20935 | 0.76983  | -0.78873 |
| C | -4.38864 | -0.19500 | -0.66074 |
| O | -4.05040 | -1.47201 | -1.20311 |
| H | -3.15539 | -2.20564 | 0.52084  |
| H | -2.71312 | -2.98921 | -1.01423 |
| H | -1.41774 | -1.01629 | -1.71442 |
| H | -0.85135 | -1.51149 | -0.11482 |
| H | -3.45866 | 1.74451  | -0.35645 |
| H | -3.00151 | 0.92246  | -1.85657 |
| H | -4.68160 | -0.30370 | 0.39697  |
| H | -5.25656 | 0.16154  | -1.22437 |
| C | 2.96421  | -1.82294 | 0.15545  |
| H | 2.13325  | -2.50020 | 0.38235  |
| H | 3.53359  | -2.27949 | -0.66297 |
| C | 3.85808  | -1.71152 | 1.40072  |
| H | 4.71005  | -1.04836 | 1.21191  |
| H | 4.24694  | -2.69373 | 1.69445  |
| H | 3.28330  | -1.30603 | 2.23857  |
| C | 2.82397  | 0.25084  | -1.36968 |
| C | 3.86871  | 0.01163  | -2.40942 |
| H | 4.66371  | 0.76765  | -2.37058 |
| H | 4.33407  | -0.96589 | -2.26173 |
| H | 3.44739  | 0.03270  | -3.42265 |

4s\_Senantiomer\_conformer-007

|   |          |          |          |
|---|----------|----------|----------|
| C | -2.73320 | 0.61489  | -0.22787 |
| N | -3.25577 | -1.38910 | 0.62919  |
| H | -3.80507 | -2.14322 | 1.01910  |
| C | -1.94340 | -1.47524 | 0.29635  |
| C | -1.56876 | -0.24370 | -0.23825 |
| C | 0.13817  | -2.51299 | -0.50036 |
| C | -1.05519 | -2.66165 | 0.45683  |
| H | -0.19964 | -2.68393 | -1.53116 |
| H | 0.88731  | -3.28003 | -0.27597 |
| H | -0.68821 | -2.72216 | 1.49272  |
| H | -1.59848 | -3.59400 | 0.26257  |
| C | -0.21884 | -0.00171 | -0.70500 |

|   |          |          |          |
|---|----------|----------|----------|
| O | 0.12019  | 1.03746  | -1.28350 |
| C | 0.79626  | -1.11962 | -0.40636 |
| H | 1.09153  | -0.97722 | 0.64216  |
| C | 2.06725  | -1.03346 | -1.29793 |
| H | 2.41135  | -2.06150 | -1.47009 |
| H | 1.77497  | -0.62927 | -2.27294 |
| C | 2.80586  | 1.76205  | 0.50568  |
| C | 3.18865  | 1.17270  | -0.85266 |
| N | 3.23130  | -0.28602 | -0.84784 |
| C | 3.97331  | -0.80560 | 0.29626  |
| C | 3.59853  | -0.14630 | 1.62948  |
| O | 3.67521  | 1.27456  | 1.53261  |
| H | 1.76216  | 1.51640  | 0.74963  |
| H | 2.91536  | 2.85151  | 0.50487  |
| H | 4.19212  | 1.54747  | -1.10935 |
| H | 2.48324  | 1.50780  | -1.61391 |
| H | 3.83349  | -1.89043 | 0.35907  |
| H | 5.04557  | -0.61776 | 0.12879  |
| H | 2.58592  | -0.44123 | 1.94682  |
| H | 4.30178  | -0.44127 | 2.41531  |
| C | -2.78532 | 2.04719  | -0.67529 |
| H | -2.30280 | 2.13817  | -1.65436 |
| H | -3.82956 | 2.35607  | -0.80328 |
| C | -2.08734 | 3.00256  | 0.30627  |
| H | -1.03033 | 2.73718  | 0.40433  |
| H | -2.14841 | 4.03936  | -0.04501 |
| H | -2.55009 | 2.94918  | 1.29832  |
| C | -3.75975 | -0.12301 | 0.32073  |
| C | -5.18684 | 0.21461  | 0.60241  |
| H | -5.41496 | 1.22286  | 0.24851  |
| H | -5.87534 | -0.47922 | 0.10332  |
| H | -5.41012 | 0.18060  | 1.67657  |

4s\_Senantiomer\_conformer-008

|   |          |          |          |
|---|----------|----------|----------|
| C | 3.37973  | -0.32743 | -0.19426 |
| N | 3.17218  | 1.89738  | -0.02306 |
| H | 3.42205  | 2.87650  | 0.01292  |
| C | 1.90304  | 1.41919  | 0.00062  |
| C | 1.98092  | 0.03012  | -0.09763 |
| C | -0.50671 | 1.38219  | -0.46465 |
| C | 0.64815  | 2.21721  | 0.10790  |
| H | -0.39661 | 1.31456  | -1.55539 |
| H | -1.46612 | 1.86777  | -0.26950 |
| H | 0.44187  | 2.46035  | 1.16137  |
| H | 0.74008  | 3.17312  | -0.42118 |



|   |          |          |          |
|---|----------|----------|----------|
| C | 0.79074  | -0.79548 | -0.09058 |
| O | 0.80869  | -2.02636 | -0.20363 |
| C | -0.53746 | -0.04171 | 0.11754  |
| H | -0.64057 | 0.04656  | 1.21145  |
| C | -1.70978 | -0.86413 | -0.43178 |
| H | -1.56382 | -0.99255 | -1.51180 |
| H | -1.68658 | -1.87525 | 0.00809  |
| C | -5.43814 | -0.49794 | -0.58147 |
| C | -4.02870 | -0.84386 | -1.09702 |
| N | -3.00681 | -0.22046 | -0.24604 |
| C | -3.46456 | -0.18081 | 1.13738  |
| C | -4.65760 | 0.78519  | 1.22763  |
| O | -5.45116 | 0.77957  | 0.03853  |
| H | -5.79021 | -1.26571 | 0.12393  |
| H | -6.15170 | -0.45666 | -1.40837 |
| H | -3.88783 | -0.48256 | -2.12283 |
| H | -3.92837 | -1.94564 | -1.11983 |
| H | -3.73530 | -1.18670 | 1.51174  |
| H | -2.66568 | 0.18948  | 1.78509  |
| H | -5.27866 | 0.53242  | 2.10114  |
| H | -4.30330 | 1.81430  | 1.34156  |
| C | 3.93966  | -1.71760 | -0.28568 |
| H | 3.36934  | -2.28899 | -1.02605 |
| H | 4.97532  | -1.67549 | -0.64352 |
| C | 3.89337  | -2.46695 | 1.05562  |
| H | 4.31389  | -3.47475 | 0.95726  |
| H | 4.46467  | -1.93067 | 1.82193  |
| H | 2.85858  | -2.55986 | 1.39839  |
| C | 4.09098  | 0.85175  | -0.14159 |
| C | 5.55715  | 1.13159  | -0.18746 |
| H | 5.91555  | 1.58469  | 0.74589  |
| H | 6.11551  | 0.20503  | -0.34130 |
| H | 5.81520  | 1.81802  | -1.00399 |

4s\_Senantiomer\_conformer-009

|   |          |          |          |
|---|----------|----------|----------|
| C | -2.88645 | 0.62844  | 0.20400  |
| N | -3.32995 | -1.35150 | -0.74803 |
| H | -3.82580 | -2.07749 | -1.24754 |
| C | -2.07183 | -1.46832 | -0.25631 |
| C | -1.74791 | -0.25363 | 0.34839  |
| C | 0.26386  | -2.21185 | -0.17294 |
| C | -1.19448 | -2.67183 | -0.31768 |
| H | 0.57088  | -1.68751 | -1.08326 |
| H | 0.92364  | -3.08044 | -0.07063 |
| H | -1.45050 | -3.36800 | 0.49555  |

|   |          |          |          |
|---|----------|----------|----------|
| H | -1.33955 | -3.22017 | -1.25604 |
| C | -0.48375 | -0.06009 | 1.02403  |
| O | -0.17915 | 0.98323  | 1.61590  |
| C | 0.46481  | -1.27799 | 1.03389  |
| H | 0.16345  | -1.83232 | 1.93886  |
| C | 1.94412  | -0.90666 | 1.24428  |
| H | 2.00730  | -0.11066 | 2.00487  |
| H | 2.44555  | -1.78782 | 1.65955  |
| C | 3.43389  | 1.77639  | -0.35931 |
| C | 2.32563  | 0.74950  | -0.56812 |
| N | 2.66181  | -0.56508 | 0.01730  |
| C | 4.10852  | -0.73587 | 0.18397  |
| C | 4.84861  | -0.05773 | -0.95845 |
| O | 4.67016  | 1.36226  | -0.94966 |
| H | 3.57398  | 1.95813  | 0.71737  |
| H | 3.16657  | 2.73021  | -0.82624 |
| H | 2.14348  | 0.63857  | -1.64606 |
| H | 1.40860  | 1.13176  | -0.11901 |
| H | 4.47555  | -0.31404 | 1.13863  |
| H | 4.34947  | -1.80641 | 0.19565  |
| H | 5.92441  | -0.24363 | -0.87943 |
| H | 4.50048  | -0.47498 | -1.91587 |
| C | -2.97481 | 2.05179  | 0.67357  |
| H | -4.02295 | 2.37382  | 0.67829  |
| H | -2.61720 | 2.11478  | 1.70713  |
| C | -2.14852 | 3.01692  | -0.19162 |
| H | -2.48406 | 2.99110  | -1.23463 |
| H | -1.09111 | 2.73769  | -0.16243 |
| H | -2.24073 | 4.04697  | 0.17253  |
| C | -3.84711 | -0.08033 | -0.48370 |
| C | -5.21633 | 0.29241  | -0.94864 |
| H | -5.29341 | 0.27638  | -2.04352 |
| H | -5.97980 | -0.39188 | -0.55715 |
| H | -5.46899 | 1.30124  | -0.61363 |

4s\_Senantiomer\_conformer-010

|   |          |          |          |
|---|----------|----------|----------|
| C | 2.04961  | -0.66591 | 0.51734  |
| N | 2.47579  | 0.50326  | -1.34569 |
| H | 2.90467  | 0.78011  | -2.21841 |
| C | 1.52590  | 1.21681  | -0.68553 |
| C | 1.22056  | 0.51823  | 0.48245  |
| C | 0.27637  | 3.19110  | 0.08889  |
| C | 0.92939  | 2.51156  | -1.12630 |
| H | -0.34310 | 4.03185  | -0.24364 |
| H | 1.06961  | 3.60989  | 0.71998  |

|   |          |          |          |
|---|----------|----------|----------|
| H | 1.69173  | 3.16688  | -1.56449 |
| H | 0.18215  | 2.34583  | -1.91530 |
| C | 0.21715  | 1.00037  | 1.41145  |
| O | -0.01785 | 0.48574  | 2.50825  |
| C | -0.57355 | 2.23463  | 0.94840  |
| H | -0.84238 | 2.76851  | 1.86578  |
| C | -1.91193 | 1.78427  | 0.26910  |
| H | -2.72698 | 2.00799  | 0.96222  |
| H | -2.09575 | 2.39950  | -0.62657 |
| C | -1.66375 | -1.46745 | -1.64849 |
| C | -1.69131 | 0.04317  | -1.44999 |
| N | -1.98677 | 0.35665  | -0.05568 |
| C | -3.24659 | -0.26555 | 0.34694  |
| C | -3.17702 | -1.77004 | 0.10999  |
| O | -2.89467 | -2.06848 | -1.25449 |
| H | -0.83285 | -1.89451 | -1.06633 |
| H | -1.51975 | -1.71407 | -2.70423 |
| H | -2.43940 | 0.49093  | -2.13315 |
| H | -0.71094 | 0.44410  | -1.71333 |
| H | -3.41182 | -0.07669 | 1.41313  |
| H | -4.10986 | 0.14769  | -0.20998 |
| H | -2.39970 | -2.20630 | 0.75668  |
| H | -4.13609 | -2.24198 | 0.34160  |
| C | 2.04752  | -1.72377 | 1.58328  |
| H | 2.95569  | -2.33259 | 1.49940  |
| H | 2.07632  | -1.24335 | 2.56733  |
| C | 0.81365  | -2.63762 | 1.52056  |
| H | 0.75495  | -3.14882 | 0.55279  |
| H | -0.09688 | -2.04697 | 1.65272  |
| H | 0.84754  | -3.39942 | 2.30852  |
| C | 2.80979  | -0.64907 | -0.63294 |
| C | 3.83217  | -1.60025 | -1.16232 |
| H | 3.51616  | -2.05147 | -2.11178 |
| H | 4.79561  | -1.10562 | -1.34032 |
| H | 4.00026  | -2.41167 | -0.45010 |

4s\_Senantiomer\_conformer-011

|   |         |          |          |
|---|---------|----------|----------|
| C | 3.04905 | 0.65750  | 0.26387  |
| N | 3.62504 | -1.34411 | -0.56339 |
| H | 4.19823 | -2.09996 | -0.91349 |
| C | 2.28679 | -1.41717 | -0.35388 |
| C | 1.87853 | -0.18641 | 0.15803  |
| C | 0.13417 | -2.44580 | 0.23641  |
| C | 1.40371 | -2.58874 | -0.61714 |
| H | 0.38111 | -2.63905 | 1.28864  |

|   |          |          |          |
|---|----------|----------|----------|
| H | -0.60072 | -3.19920 | -0.06644 |
| H | 1.12810  | -2.62321 | -1.68210 |
| H | 1.91763  | -3.53162 | -0.39620 |
| C | 0.49334  | 0.07248  | 0.49265  |
| O | 0.10261  | 1.12579  | 1.00739  |
| C | -0.50133 | -1.04465 | 0.11756  |
| H | -0.73383 | -0.88550 | -0.94737 |
| C | -1.82864 | -0.95146 | 0.89410  |
| H | -2.11486 | -1.95593 | 1.22504  |
| H | -1.68927 | -0.33825 | 1.80013  |
| C | -3.96064 | 1.39170  | -1.15890 |
| C | -2.80613 | 0.97033  | -0.25844 |
| N | -2.93556 | -0.45070 | 0.07401  |
| C | -4.22556 | -0.67531 | 0.72655  |
| C | -5.35549 | -0.21776 | -0.18926 |
| O | -5.22058 | 1.15793  | -0.53359 |
| H | -3.90706 | 0.83802  | -2.11013 |
| H | -3.91323 | 2.46345  | -1.37172 |
| H | -2.80401 | 1.59799  | 0.65177  |
| H | -1.85698 | 1.14385  | -0.77214 |
| H | -4.33895 | -1.74493 | 0.93869  |
| H | -4.29763 | -0.13182 | 1.68915  |
| H | -5.35698 | -0.83387 | -1.10280 |
| H | -6.32375 | -0.32254 | 0.30840  |
| C | 3.07790  | 2.08326  | 0.73353  |
| H | 2.50067  | 2.17040  | 1.66046  |
| H | 4.10856  | 2.37305  | 0.97032  |
| C | 2.49688  | 3.06117  | -0.30045 |
| H | 1.45086  | 2.81401  | -0.50472 |
| H | 2.53947  | 4.09300  | 0.06789  |
| H | 3.05488  | 3.01031  | -1.24238 |
| C | 4.11332  | -0.08806 | -0.19499 |
| C | 5.56454  | 0.23352  | -0.33809 |
| H | 5.77127  | 1.23422  | 0.04886  |
| H | 6.19476  | -0.47582 | 0.21336  |
| H | 5.88642  | 0.20953  | -1.38721 |

4s\_Senantiomer\_conformer-012

|   |          |          |          |
|---|----------|----------|----------|
| C | -3.02645 | -0.69258 | -0.22955 |
| N | -3.56086 | 1.46490  | -0.51573 |
| H | -4.11368 | 2.29340  | -0.69015 |
| C | -2.23643 | 1.46216  | -0.22272 |
| C | -1.85494 | 0.13434  | -0.03519 |
| C | -0.10959 | 2.26558  | 0.70797  |
| C | -1.33892 | 2.64864  | -0.12986 |

|   |          |          |          |
|---|----------|----------|----------|
| H | -0.40356 | 2.17414  | 1.76188  |
| H | 0.64000  | 3.06195  | 0.64970  |
| H | -1.01619 | 2.95893  | -1.13528 |
| H | -1.85894 | 3.50740  | 0.31076  |
| C | -0.48318 | -0.22519 | 0.25955  |
| O | -0.11286 | -1.38556 | 0.46872  |
| C | 0.52838  | 0.93868  | 0.24649  |
| H | 0.81302  | 1.06832  | -0.80962 |
| C | 1.81566  | 0.62169  | 1.03235  |
| H | 2.07210  | 1.48721  | 1.65319  |
| H | 1.63821  | -0.22650 | 1.71455  |
| C | 4.07695  | -1.04429 | -1.48821 |
| C | 2.87557  | -0.89470 | -0.56322 |
| N | 2.96842  | 0.37515  | 0.16135  |
| C | 4.22261  | 0.40756  | 0.91387  |
| C | 5.40099  | 0.22755  | -0.03686 |
| O | 5.30246  | -0.99536 | -0.76092 |
| H | 4.06002  | -0.24476 | -2.24632 |
| H | 4.05538  | -2.01253 | -1.99635 |
| H | 2.84074  | -1.75315 | 0.13289  |
| H | 1.95353  | -0.91750 | -1.15009 |
| H | 4.31019  | 1.37403  | 1.42396  |
| H | 4.25709  | -0.38540 | 1.68664  |
| H | 5.43670  | 1.07626  | -0.73869 |
| H | 6.34307  | 0.18829  | 0.51731  |
| C | -3.09451 | -2.18633 | -0.09488 |
| H | -4.00101 | -2.56015 | -0.58573 |
| H | -2.24181 | -2.63554 | -0.61582 |
| C | -3.07686 | -2.65260 | 1.36968  |
| H | -2.15247 | -2.32620 | 1.85510  |
| H | -3.92530 | -2.23384 | 1.92286  |
| H | -3.13165 | -3.74576 | 1.43446  |
| C | -4.06611 | 0.16251  | -0.52428 |
| C | -5.51012 | -0.08967 | -0.80916 |
| H | -5.71116 | -1.16353 | -0.82630 |
| H | -6.16059 | 0.35816  | -0.04671 |
| H | -5.81187 | 0.32373  | -1.77993 |

#### 4s\_Senantiomer\_conformer-013

|   |          |          |          |
|---|----------|----------|----------|
| C | 3.03671  | 0.60063  | 0.14860  |
| N | 3.40940  | -1.47828 | -0.60036 |
| H | 3.89990  | -2.28885 | -0.95342 |
| C | 2.09415  | -1.44967 | -0.26966 |
| C | 1.81126  | -0.16724 | 0.19892  |
| C | -0.04855 | -2.30195 | 0.57604  |

|   |          |          |          |
|---|----------|----------|----------|
| C | 1.12024  | -2.57267 | -0.38344 |
| H | 0.28958  | -2.45381 | 1.60968  |
| H | -0.85318 | -3.02233 | 0.39265  |
| H | 0.74124  | -2.64219 | -1.41448 |
| H | 1.59546  | -3.53492 | -0.15918 |
| C | 0.47878  | 0.20299  | 0.63030  |
| O | 0.19462  | 1.31557  | 1.08809  |
| C | -0.60754 | -0.87253 | 0.43619  |
| H | -0.92736 | -0.75318 | -0.61131 |
| C | -1.83576 | -0.63374 | 1.35510  |
| H | -2.10448 | -1.57991 | 1.84027  |
| H | -1.55618 | 0.07396  | 2.14059  |
| C | -4.98092 | -0.50372 | -0.72020 |
| C | -3.64096 | -1.05328 | -0.24078 |
| N | -3.04905 | -0.12465 | 0.71812  |
| C | -2.89674 | 1.20054  | 0.12012  |
| C | -4.25412 | 1.69458  | -0.36656 |
| O | -4.82890 | 0.78685  | -1.30511 |
| H | -5.67980 | -0.44897 | 0.12974  |
| H | -5.41157 | -1.14808 | -1.49191 |
| H | -2.99445 | -1.22106 | -1.12349 |
| H | -3.79324 | -2.02320 | 0.24772  |
| H | -2.49040 | 1.88544  | 0.86979  |
| H | -2.19382 | 1.19591  | -0.73386 |
| H | -4.93154 | 1.81950  | 0.49331  |
| H | -4.15628 | 2.65419  | -0.88217 |
| C | 3.19843  | 2.04504  | 0.52518  |
| H | 2.70252  | 2.22626  | 1.48492  |
| H | 4.26166  | 2.27269  | 0.66710  |
| C | 2.60694  | 3.00208  | -0.52228 |
| H | 1.53453  | 2.81808  | -0.63630 |
| H | 2.74539  | 4.04735  | -0.22155 |
| H | 3.08788  | 2.85941  | -1.49669 |
| C | 4.00634  | -0.23953 | -0.35461 |
| C | 5.45536  | -0.02514 | -0.64530 |
| H | 5.76110  | 0.97600  | -0.33194 |
| H | 6.08794  | -0.74960 | -0.11666 |
| H | 5.67518  | -0.11984 | -1.71661 |

4s\_Senantiomer\_conformer-014

|   |         |          |          |
|---|---------|----------|----------|
| C | 2.99296 | 0.58734  | -0.33819 |
| N | 3.32809 | -1.62124 | -0.51708 |
| H | 3.79673 | -2.50307 | -0.67556 |
| C | 2.03512 | -1.48778 | -0.12923 |
| C | 1.77753 | -0.12326 | -0.00382 |

|   |          |          |          |
|---|----------|----------|----------|
| C | -0.06707 | -2.05114 | 1.00824  |
| C | 1.05491  | -2.58614 | 0.10580  |
| H | 0.31944  | -1.92341 | 2.02809  |
| H | -0.88013 | -2.78324 | 1.06286  |
| H | 0.62841  | -2.92418 | -0.85092 |
| H | 1.53826  | -3.45982 | 0.55890  |
| C | 0.46413  | 0.36806  | 0.35937  |
| O | 0.19986  | 1.56749  | 0.49982  |
| C | -0.63116 | -0.70456 | 0.51428  |
| H | -1.00461 | -0.86699 | -0.50937 |
| C | -1.81028 | -0.20927 | 1.39504  |
| H | -2.04873 | -0.98304 | 2.13486  |
| H | -1.49226 | 0.68379  | 1.94033  |
| C | -5.06244 | -0.62013 | -0.46771 |
| C | -3.69562 | -1.03072 | 0.07131  |
| N | -3.05810 | 0.11846  | 0.70795  |
| C | -2.94511 | 1.22885  | -0.23597 |
| C | -4.32943 | 1.58449  | -0.76560 |
| O | -4.94915 | 0.46098  | -1.38919 |
| H | -5.71507 | -0.32969 | 0.37107  |
| H | -5.53022 | -1.44619 | -1.01084 |
| H | -3.09640 | -1.43839 | -0.76538 |
| H | -3.81592 | -1.82943 | 0.81301  |
| H | -2.50254 | 2.08843  | 0.27546  |
| H | -2.28943 | 0.98476  | -1.09266 |
| H | -4.96003 | 1.94521  | 0.06272  |
| H | -4.26489 | 2.36640  | -1.52765 |
| C | 3.19150  | 2.07530  | -0.30919 |
| H | 4.08140  | 2.34025  | -0.89259 |
| H | 2.33728  | 2.56340  | -0.79093 |
| C | 3.33283  | 2.62919  | 1.11771  |
| H | 2.42846  | 2.41462  | 1.69476  |
| H | 4.18698  | 2.17281  | 1.63085  |
| H | 3.48168  | 3.71540  | 1.10425  |
| C | 3.93435  | -0.36971 | -0.64966 |
| C | 5.36745  | -0.25978 | -1.05490 |
| H | 6.03744  | -0.71167 | -0.31197 |
| H | 5.55887  | -0.75839 | -2.01364 |
| H | 5.65174  | 0.78983  | -1.16165 |

4s\_Senantiomer\_conformer-015

|   |          |          |          |
|---|----------|----------|----------|
| C | -2.77500 | 0.77976  | 0.12280  |
| N | -3.30597 | -1.21088 | -0.75864 |
| H | -3.83559 | -1.93141 | -1.23056 |
| C | -2.10920 | -1.40075 | -0.14892 |

|   |          |          |          |
|---|----------|----------|----------|
| C | -1.73330 | -0.18066 | 0.41384  |
| C | -0.32806 | -2.56530 | 1.08576  |
| C | -1.34184 | -2.67772 | -0.06842 |
| H | 0.37127  | -3.40785 | 1.05314  |
| H | -0.86916 | -2.62947 | 2.03725  |
| H | -2.01065 | -3.53181 | 0.09062  |
| H | -0.81925 | -2.86688 | -1.01678 |
| C | -0.49518 | -0.04130 | 1.15172  |
| O | -0.19656 | 0.96535  | 1.80503  |
| C | 0.46412  | -1.23940 | 1.04746  |
| H | 1.13194  | -1.19704 | 1.91371  |
| C | 1.34711  | -1.16674 | -0.22800 |
| H | 1.55119  | -2.19172 | -0.55782 |
| H | 0.78720  | -0.67951 | -1.04923 |
| C | 3.94406  | 1.49311  | 0.42880  |
| C | 2.55433  | 0.91218  | 0.20312  |
| N | 2.64773  | -0.53350 | -0.01829 |
| C | 3.53979  | -0.79529 | -1.14996 |
| C | 4.90928  | -0.17976 | -0.88726 |
| O | 4.81315  | 1.22425  | -0.66891 |
| H | 4.37147  | 1.07293  | 1.35353  |
| H | 3.89390  | 2.58109  | 0.52771  |
| H | 2.08431  | 1.41793  | -0.66456 |
| H | 1.92869  | 1.10640  | 1.07664  |
| H | 3.64592  | -1.87858 | -1.28041 |
| H | 3.13332  | -0.38058 | -2.09322 |
| H | 5.36658  | -0.66509 | -0.01005 |
| H | 5.56680  | -0.31933 | -1.74996 |
| C | -2.76355 | 2.23494  | 0.49138  |
| H | -3.76676 | 2.65763  | 0.36098  |
| H | -2.50827 | 2.33820  | 1.55156  |
| C | -1.75517 | 3.04632  | -0.33868 |
| H | -1.98730 | 2.97954  | -1.40765 |
| H | -0.74178 | 2.66398  | -0.18259 |
| H | -1.76974 | 4.10385  | -0.04995 |
| C | -3.73117 | 0.11191  | -0.61079 |
| C | -5.01974 | 0.56571  | -1.21358 |
| H | -5.22093 | 1.60457  | -0.94126 |
| H | -5.00102 | 0.50620  | -2.30946 |
| H | -5.86599 | -0.04131 | -0.86763 |

4s\_Senantiomer\_conformer-016

|   |         |          |          |
|---|---------|----------|----------|
| C | 3.29299 | 0.42721  | -0.37686 |
| N | 3.34102 | -1.79334 | -0.07901 |
| H | 3.69936 | -2.73549 | 0.00051  |



|   |          |          |          |
|---|----------|----------|----------|
| C | 2.04585  | -1.43735 | 0.10851  |
| C | 1.96454  | -0.05654 | -0.06775 |
| C | -0.21364 | -1.50127 | 1.06104  |
| C | 0.90924  | -2.34358 | 0.43815  |
| H | 0.09231  | -1.17706 | 2.06409  |
| H | -1.11130 | -2.11433 | 1.18673  |
| H | 0.53839  | -2.83665 | -0.47333 |
| H | 1.22356  | -3.14222 | 1.12036  |
| C | 0.70178  | 0.64650  | 0.02516  |
| O | 0.59358  | 1.87119  | -0.09061 |
| C | -0.54395 | -0.25330 | 0.21751  |
| H | -0.79962 | -0.58356 | -0.80217 |
| C | -1.74327 | 0.54505  | 0.75377  |
| H | -1.91204 | 0.29137  | 1.81888  |
| H | -1.49277 | 1.60804  | 0.70806  |
| C | -5.23828 | 1.13918  | -0.49337 |
| C | -3.99613 | 1.31164  | 0.37235  |
| N | -2.96363 | 0.35675  | -0.03317 |
| C | -3.49679 | -1.00318 | 0.05355  |
| C | -4.75429 | -1.12698 | -0.79985 |
| O | -5.74935 | -0.18814 | -0.40360 |
| H | -4.99215 | 1.37526  | -1.54096 |
| H | -6.03812 | 1.80611  | -0.15980 |
| H | -4.27741 | 1.17961  | 1.43570  |
| H | -3.60536 | 2.32903  | 0.25573  |
| H | -2.75093 | -1.71414 | -0.31513 |
| H | -3.73593 | -1.27744 | 1.10027  |
| H | -4.49355 | -0.97142 | -1.85898 |
| H | -5.19834 | -2.12006 | -0.68853 |
| C | 3.68884  | 1.85599  | -0.61355 |
| H | 4.65982  | 1.89021  | -1.12193 |
| H | 2.96156  | 2.32663  | -1.28412 |
| C | 3.76325  | 2.67534  | 0.68487  |
| H | 2.78593  | 2.68945  | 1.17630  |
| H | 4.49295  | 2.24205  | 1.37838  |
| H | 4.05911  | 3.71089  | 0.47923  |
| C | 4.12200  | -0.67359 | -0.37471 |
| C | 5.59014  | -0.81279 | -0.60946 |
| H | 6.11357  | -1.17460 | 0.28502  |
| H | 5.80752  | -1.51699 | -1.42259 |
| H | 6.02425  | 0.15304  | -0.87889 |

4s\_Senantiomer\_conformer-017

|   |          |          |          |
|---|----------|----------|----------|
| C | -3.32522 | 0.48975  | -0.09821 |
| N | -3.39132 | -1.73008 | 0.20225  |

|   |          |          |          |
|---|----------|----------|----------|
| H | -3.76100 | -2.66114 | 0.34005  |
| C | -2.08028 | -1.43500 | 0.01810  |
| C | -1.98689 | -0.05622 | -0.16832 |
| C | 0.22324  | -1.75354 | -0.76255 |
| C | -0.94095 | -2.39622 | 0.00577  |
| H | -0.02840 | -1.71246 | -1.83020 |
| H | 1.11722  | -2.37804 | -0.67207 |
| H | -0.62299 | -2.62331 | 1.03473  |
| H | -1.23081 | -3.35012 | -0.45026 |
| C | -0.71196 | 0.59485  | -0.38723 |
| O | -0.59327 | 1.80519  | -0.60170 |
| C | 0.52950  | -0.32409 | -0.27185 |
| H | 0.73350  | -0.36624 | 0.81029  |
| C | 1.76213  | 0.30025  | -0.94561 |
| H | 1.97548  | -0.23046 | -1.89436 |
| H | 1.52330  | 1.33636  | -1.19878 |
| C | 5.20626  | 1.20642  | 0.25422  |
| C | 4.00515  | 1.14013  | -0.68127 |
| N | 2.94355  | 0.33049  | -0.08118 |
| C | 3.46244  | -1.00278 | 0.22604  |
| C | 4.68012  | -0.89280 | 1.13715  |
| O | 5.70349  | -0.09643 | 0.54803  |
| H | 4.91821  | 1.71612  | 1.18752  |
| H | 6.02831  | 1.75824  | -0.21005 |
| H | 4.33068  | 0.72623  | -1.65593 |
| H | 3.62286  | 2.15158  | -0.86076 |
| H | 2.69221  | -1.58747 | 0.73850  |
| H | 3.74318  | -1.54940 | -0.69612 |
| H | 4.37585  | -0.45714 | 2.10233  |
| H | 5.11564  | -1.87946 | 1.31767  |
| C | -3.70352 | 1.93875  | -0.20613 |
| H | -3.17991 | 2.38762  | -1.05705 |
| H | -4.77741 | 2.02523  | -0.41015 |
| C | -3.35913 | 2.73834  | 1.06080  |
| H | -3.87667 | 2.32642  | 1.93464  |
| H | -2.28190 | 2.70055  | 1.24849  |
| H | -3.65165 | 3.78953  | 0.95323  |
| C | -4.17087 | -0.57278 | 0.13592  |
| C | -5.65200 | -0.64438 | 0.31220  |
| H | -6.10007 | 0.34068  | 0.16128  |
| H | -6.11353 | -1.33600 | -0.40409 |
| H | -5.92756 | -0.98436 | 1.31887  |

4s\_Senantiomer\_conformer-018

|   |          |         |          |
|---|----------|---------|----------|
| C | -2.74207 | 0.67370 | -0.36134 |
|---|----------|---------|----------|

|   |          |          |          |
|---|----------|----------|----------|
| N | -3.16010 | -1.50852 | -0.65401 |
| H | -3.63793 | -2.35780 | -0.92433 |
| C | -1.98387 | -1.45996 | 0.01967  |
| C | -1.67980 | -0.11377 | 0.22596  |
| C | -0.20592 | -2.13990 | 1.57542  |
| C | -1.16683 | -2.62280 | 0.47338  |
| H | 0.52505  | -2.92288 | 1.80496  |
| H | -0.78288 | -1.95650 | 2.48963  |
| H | -1.80476 | -3.43171 | 0.84835  |
| H | -0.59999 | -3.04216 | -0.36995 |
| C | -0.46438 | 0.28917  | 0.90194  |
| O | -0.21187 | 1.45766  | 1.21902  |
| C | 0.53755  | -0.84478 | 1.18195  |
| H | 1.16097  | -0.52393 | 2.02257  |
| C | 1.48153  | -1.09683 | -0.02616 |
| H | 1.70098  | -2.16958 | -0.07001 |
| H | 0.96580  | -0.84509 | -0.97271 |
| C | 4.04023  | 1.67511  | 0.06157  |
| C | 2.66588  | 1.03678  | -0.09105 |
| N | 2.76983  | -0.41479 | 0.08035  |
| C | 3.72741  | -0.95097 | -0.88887 |
| C | 5.08013  | -0.27028 | -0.71319 |
| O | 4.97547  | 1.14102  | -0.87285 |
| H | 4.40729  | 1.51554  | 1.08828  |
| H | 3.98824  | 2.75061  | -0.12978 |
| H | 2.25555  | 1.29062  | -1.08910 |
| H | 1.98325  | 1.44337  | 0.65836  |
| H | 3.83815  | -2.02939 | -0.72591 |
| H | 3.38087  | -0.80128 | -1.93023 |
| H | 5.48064  | -0.50571 | 0.28597  |
| H | 5.78929  | -0.62013 | -1.46870 |
| C | -2.84656 | 2.17139  | -0.35535 |
| H | -1.87061 | 2.60221  | -0.60555 |
| H | -3.54656 | 2.49564  | -1.13465 |
| C | -3.29770 | 2.73149  | 1.00308  |
| H | -3.36979 | 3.82514  | 0.97222  |
| H | -2.57628 | 2.45644  | 1.77796  |
| H | -4.27868 | 2.33144  | 1.28386  |
| C | -3.64218 | -0.22027 | -0.89912 |
| C | -4.93072 | -0.01706 | -1.62593 |
| H | -5.78221 | -0.43053 | -1.07010 |
| H | -5.11825 | 1.04926  | -1.77331 |
| H | -4.92120 | -0.49596 | -2.61329 |

4s\_Senantiomer\_conformer-019

|   |          |          |          |
|---|----------|----------|----------|
| C | 3.25656  | 0.21168  | -0.02769 |
| N | 2.68800  | -1.95241 | 0.09285  |
| H | 2.76727  | -2.95092 | 0.23116  |
| C | 1.57108  | -1.31659 | -0.34089 |
| C | 1.87642  | 0.04297  | -0.42739 |
| C | -0.52219 | -1.00061 | -1.59487 |
| C | 0.25834  | -1.94622 | -0.66599 |
| H | -1.55284 | -1.35082 | -1.69539 |
| H | -0.06222 | -1.02261 | -2.59014 |
| H | 0.39702  | -2.92482 | -1.14037 |
| H | -0.31688 | -2.12596 | 0.25361  |
| C | 0.88587  | 1.00961  | -0.85165 |
| O | 1.09891  | 2.22137  | -0.97101 |
| C | -0.52617 | 0.45164  | -1.08640 |
| H | -0.98147 | 1.09836  | -1.84360 |
| C | -1.30208 | 0.61491  | 0.24058  |
| H | -0.75164 | 0.10523  | 1.03961  |
| H | -1.32145 | 1.68890  | 0.50397  |
| C | -4.91817 | 0.10527  | -0.69036 |
| C | -3.55382 | 0.78492  | -0.66771 |
| N | -2.64245 | 0.04025  | 0.20211  |
| C | -3.21759 | -0.06774 | 1.54357  |
| C | -4.58614 | -0.73391 | 1.46756  |
| O | -5.46837 | -0.00473 | 0.61895  |
| H | -4.82006 | -0.89560 | -1.14048 |
| H | -5.62953 | 0.68925  | -1.28074 |
| H | -3.67009 | 1.83148  | -0.32494 |
| H | -3.15267 | 0.81004  | -1.68555 |
| H | -2.55012 | -0.67062 | 2.16978  |
| H | -3.32488 | 0.92503  | 2.02192  |
| H | -4.47207 | -1.76372 | 1.09300  |
| H | -5.05602 | -0.76654 | 2.45440  |
| C | 3.99974  | 1.51254  | 0.06975  |
| H | 5.07815  | 1.31945  | 0.11520  |
| H | 3.81942  | 2.10150  | -0.83622 |
| C | 3.57803  | 2.34670  | 1.29027  |
| H | 3.75274  | 1.79333  | 2.22000  |
| H | 4.14315  | 3.28504  | 1.33856  |
| H | 2.51347  | 2.59115  | 1.22826  |
| C | 3.72970  | -1.04253 | 0.29094  |
| C | 5.06436  | -1.50976 | 0.77089  |
| H | 5.49199  | -2.27114 | 0.10609  |
| H | 5.76573  | -0.67308 | 0.81470  |
| H | 5.00630  | -1.94832 | 1.77544  |

4s\_Senantiomer\_conformer-020

|   |          |          |          |
|---|----------|----------|----------|
| C | -2.27078 | -0.98755 | -0.37474 |
| N | -3.23472 | 0.57149  | 0.91314  |
| H | -3.90049 | 1.01775  | 1.52936  |
| C | -2.15725 | 1.18503  | 0.35743  |
| C | -1.52364 | 0.24609  | -0.45537 |
| C | -0.70682 | 3.00229  | -0.49951 |
| C | -1.73487 | 2.59999  | 0.57808  |
| H | -0.19530 | 3.92238  | -0.19527 |
| H | -1.24019 | 3.22638  | -1.43064 |
| H | -2.59600 | 3.27831  | 0.54654  |
| H | -1.30087 | 2.70928  | 1.58180  |
| C | -0.33974 | 0.58981  | -1.21629 |
| O | 0.12713  | -0.10066 | -2.12732 |
| C | 0.33368  | 1.89947  | -0.79111 |
| H | 0.95748  | 2.22212  | -1.63048 |
| C | 1.22600  | 1.64315  | 0.44331  |
| H | 1.86367  | 2.53454  | 0.60528  |
| H | 0.59044  | 1.54290  | 1.32887  |
| C | 3.38879  | -1.22798 | 1.52653  |
| C | 2.64780  | 0.09928  | 1.63387  |
| N | 2.01262  | 0.41804  | 0.35629  |
| C | 3.01544  | 0.44942  | -0.70909 |
| C | 3.75861  | -0.88026 | -0.75606 |
| O | 4.36943  | -1.18920 | 0.49412  |
| H | 2.66605  | -2.03544 | 1.32673  |
| H | 3.92009  | -1.45114 | 2.45600  |
| H | 3.36140  | 0.88781  | 1.94349  |
| H | 1.87516  | 0.02592  | 2.40806  |
| H | 2.51389  | 0.60414  | -1.66697 |
| H | 3.74095  | 1.27183  | -0.55415 |
| H | 3.05401  | -1.67999 | -1.03489 |
| H | 4.56290  | -0.84574 | -1.49621 |
| C | -1.88696 | -2.28327 | -1.02807 |
| H | -2.72482 | -2.98900 | -0.98143 |
| H | -1.67490 | -2.10603 | -2.08789 |
| C | -0.64518 | -2.91518 | -0.37543 |
| H | -0.83787 | -3.14967 | 0.67785  |
| H | 0.20140  | -2.22286 | -0.42003 |
| H | -0.36000 | -3.84253 | -0.88613 |
| C | -3.32093 | -0.75599 | 0.48708  |
| C | -4.41432 | -1.64400 | 0.98296  |
| H | -4.35352 | -1.80069 | 2.06771  |
| H | -5.40632 | -1.22643 | 0.76833  |
| H | -4.35388 | -2.62344 | 0.50220  |

## 4s\_Senantiomer\_conformer-021

|   |          |          |          |
|---|----------|----------|----------|
| C | -2.71203 | -0.58543 | 0.27253  |
| N | -2.98810 | 1.57970  | 0.78122  |
| H | -3.39169 | 2.42306  | 1.16633  |
| C | -1.82006 | 1.52231  | 0.09490  |
| C | -1.60573 | 0.18766  | -0.24942 |
| C | 0.49330  | 2.12462  | -0.44589 |
| C | -0.93194 | 2.66565  | -0.25864 |
| H | 0.90032  | 1.84182  | 0.52962  |
| H | 1.14499  | 2.91126  | -0.84203 |
| H | -1.27895 | 3.14136  | -1.18837 |
| H | -0.95502 | 3.43983  | 0.51721  |
| C | -0.45293 | -0.21524 | -1.02611 |
| O | -0.27498 | -1.36580 | -1.44165 |
| C | 0.54536  | 0.90792  | -1.38787 |
| H | 0.21191  | 1.24143  | -2.38439 |
| C | 1.97672  | 0.38162  | -1.58088 |
| H | 1.92615  | -0.57286 | -2.13106 |
| H | 2.52125  | 1.09533  | -2.20927 |
| C | 3.05017  | -0.81333 | 1.84240  |
| C | 2.20826  | -0.76577 | 0.57257  |
| N | 2.73906  | 0.25038  | -0.33806 |
| C | 4.14731  | -0.02843 | -0.62068 |
| C | 4.94181  | -0.08961 | 0.67799  |
| O | 4.41948  | -1.08245 | 1.55604  |
| H | 2.70488  | -1.61477 | 2.50148  |
| H | 2.96222  | 0.14691  | 2.37601  |
| H | 1.17989  | -0.51290 | 0.84701  |
| H | 2.18937  | -1.76533 | 0.10064  |
| H | 4.27066  | -0.98549 | -1.16452 |
| H | 4.54829  | 0.76900  | -1.25704 |
| H | 5.98305  | -0.36035 | 0.48181  |
| H | 4.91729  | 0.89568  | 1.17061  |
| C | -2.91623 | -2.06512 | 0.12002  |
| H | -1.96545 | -2.58066 | 0.29433  |
| H | -3.61716 | -2.42181 | 0.88432  |
| C | -3.43829 | -2.45327 | -1.27259 |
| H | -3.58315 | -3.53744 | -1.34943 |
| H | -4.39692 | -1.96421 | -1.48021 |
| H | -2.72032 | -2.14768 | -2.03924 |
| C | -3.54964 | 0.30640  | 0.90641  |
| C | -4.83887 | 0.11321  | 1.63460  |
| H | -5.09323 | -0.94852 | 1.67914  |
| H | -4.78542 | 0.48916  | 2.66433  |
| H | -5.66900 | 0.63342  | 1.13947  |

## 4s\_Senantiomer\_conformer-022

|   |          |          |          |
|---|----------|----------|----------|
| C | -2.34820 | -0.87550 | 0.19685  |
| N | -3.06718 | 1.10100  | 0.96891  |
| H | -3.64181 | 1.78664  | 1.44009  |
| C | -1.96228 | 1.38748  | 0.23374  |
| C | -1.47642 | 0.17993  | -0.26876 |
| C | -0.42052 | 2.67885  | -1.20114 |
| C | -1.38467 | 2.74371  | -0.00019 |
| H | 0.18346  | 3.59233  | -1.24099 |
| H | -1.01033 | 2.64420  | -2.12447 |
| H | -2.17518 | 3.47924  | -0.19132 |
| H | -0.85684 | 3.09195  | 0.89854  |
| C | -0.29071 | 0.13449  | -1.09925 |
| O | 0.09151  | -0.86914 | -1.71000 |
| C | 0.50577  | 1.44481  | -1.16817 |
| H | 1.07364  | 1.41489  | -2.10324 |
| C | 1.48890  | 1.53712  | 0.01849  |
| H | 2.14917  | 2.41132  | -0.15023 |
| H | 0.92538  | 1.73920  | 0.93559  |
| C | 3.73939  | -0.90381 | 1.76638  |
| C | 3.01632  | 0.41141  | 1.50166  |
| N | 2.25235  | 0.31872  | 0.25824  |
| C | 3.14252  | -0.03405 | -0.84864 |
| C | 3.86923  | -1.33442 | -0.52799 |
| O | 4.60671  | -1.24225 | 0.68826  |
| H | 2.99828  | -1.70510 | 1.91665  |
| H | 4.36453  | -0.82862 | 2.66058  |
| H | 3.76001  | 1.23168  | 1.46341  |
| H | 2.32872  | 0.62400  | 2.32869  |
| H | 2.54736  | -0.18106 | -1.75243 |
| H | 3.88435  | 0.76591  | -1.04088 |
| H | 3.13278  | -2.15081 | -0.45801 |
| H | 4.59097  | -1.57660 | -1.31306 |
| C | -2.21951 | -2.33746 | -0.11995 |
| H | -1.16731 | -2.63242 | -0.03780 |
| H | -2.77350 | -2.92650 | 0.62083  |
| C | -2.71993 | -2.68761 | -1.53042 |
| H | -2.61694 | -3.76113 | -1.72860 |
| H | -2.13662 | -2.14234 | -2.27791 |
| H | -3.77554 | -2.41733 | -1.64847 |
| C | -3.32210 | -0.27195 | 0.96275  |
| C | -4.49319 | -0.83176 | 1.70109  |
| H | -4.46579 | -0.57192 | 2.76698  |
| H | -5.44445 | -0.46032 | 1.29846  |

|   |          |          |         |
|---|----------|----------|---------|
| H | -4.50400 | -1.92162 | 1.62281 |
|---|----------|----------|---------|

4s\_Senantiomer\_conformer-023

|   |          |          |          |
|---|----------|----------|----------|
| C | -3.23533 | 0.54087  | 0.27635  |
| N | -3.43560 | -1.67688 | 0.02444  |
| H | -3.86089 | -2.58912 | -0.07272 |
| C | -2.10184 | -1.43346 | -0.01833 |
| C | -1.92573 | -0.05832 | 0.13528  |
| C | 0.23365  | -1.71412 | -0.71340 |
| C | -1.01337 | -2.43882 | -0.18654 |
| H | 0.06029  | -1.41322 | -1.75559 |
| H | 1.09933  | -2.38124 | -0.70932 |
| H | -0.78506 | -2.91620 | 0.77860  |
| H | -1.31777 | -3.24206 | -0.86802 |
| C | -0.60443 | 0.53423  | 0.17975  |
| O | -0.40157 | 1.74775  | 0.30300  |
| C | 0.57007  | -0.46116 | 0.11277  |
| H | 0.73085  | -0.78191 | 1.15547  |
| C | 1.84296  | 0.23443  | -0.38942 |
| H | 1.69317  | 0.51045  | -1.43990 |
| H | 1.96921  | 1.17519  | 0.16207  |
| C | 4.89739  | 0.92061  | -0.81898 |
| C | 4.08019  | -0.29128 | -1.27026 |
| N | 3.01408  | -0.64896 | -0.32711 |
| C | 3.58687  | -0.78018 | 1.02036  |
| C | 4.41857  | 0.43628  | 1.43425  |
| O | 5.44916  | 0.69667  | 0.47975  |
| H | 4.27149  | 1.82778  | -0.80753 |
| H | 5.74443  | 1.09590  | -1.48950 |
| H | 4.75841  | -1.15134 | -1.35361 |
| H | 3.64254  | -0.11186 | -2.25827 |
| H | 2.78642  | -0.95500 | 1.74643  |
| H | 4.23654  | -1.66509 | 1.02633  |
| H | 3.77939  | 1.32716  | 1.54174  |
| H | 4.91901  | 0.25859  | 2.39105  |
| C | -3.53267 | 2.00449  | 0.42951  |
| H | -4.55365 | 2.13629  | 0.80726  |
| H | -2.85784 | 2.43496  | 1.17746  |
| C | -3.36973 | 2.78405  | -0.88518 |
| H | -3.59877 | 3.84680  | -0.74257 |
| H | -2.33998 | 2.70083  | -1.24519 |
| H | -4.03951 | 2.39007  | -1.65808 |
| C | -4.14842 | -0.48848 | 0.20123  |
| C | -5.64037 | -0.50081 | 0.26395  |
| H | -6.00886 | -1.16304 | 1.05773  |



|   |          |          |          |
|---|----------|----------|----------|
| H | -6.01984 | 0.50407  | 0.46430  |
| H | -6.08571 | -0.84236 | -0.67949 |

4s\_Senantiomer\_conformer-024

|   |          |          |          |
|---|----------|----------|----------|
| C | -3.24009 | 0.52902  | -0.25375 |
| N | -3.44202 | -1.65203 | 0.22030  |
| H | -3.86678 | -2.55474 | 0.38533  |
| C | -2.10639 | -1.41694 | 0.19056  |
| C | -1.92933 | -0.06358 | -0.09674 |
| C | 0.25969  | -1.88736 | -0.25440 |
| C | -1.01801 | -2.41057 | 0.41796  |
| H | 0.14219  | -1.94911 | -1.34487 |
| H | 1.11948  | -2.50649 | 0.01392  |
| H | -0.84258 | -2.54126 | 1.49666  |
| H | -1.29295 | -3.39623 | 0.02423  |
| C | -0.60763 | 0.52205  | -0.19082 |
| O | -0.40269 | 1.70947  | -0.46790 |
| C | 0.56257  | -0.42871 | 0.12750  |
| H | 0.67122  | -0.38645 | 1.22414  |
| C | 1.86251  | 0.07528  | -0.51466 |
| H | 1.76681  | -0.01476 | -1.60317 |
| H | 1.96679  | 1.14707  | -0.30126 |
| C | 4.93927  | 0.60123  | -1.01206 |
| C | 4.13437  | -0.69863 | -1.06286 |
| N | 3.02345  | -0.72447 | -0.10429 |
| C | 3.53214  | -0.38632 | 1.23277  |
| C | 4.35329  | 0.90527  | 1.24759  |
| O | 5.42868  | 0.83565  | 0.30964  |
| H | 4.32051  | 1.45317  | -1.33799 |
| H | 5.81779  | 0.54590  | -1.66242 |
| H | 4.80904  | -1.53045 | -0.81875 |
| H | 3.74396  | -0.86837 | -2.07214 |
| H | 2.69728  | -0.31082 | 1.93692  |
| H | 4.17360  | -1.21136 | 1.56897  |
| H | 3.71673  | 1.77455  | 1.01758  |
| H | 4.80792  | 1.06646  | 2.22985  |
| C | -3.53703 | 1.97316  | -0.53847 |
| H | -2.88270 | 2.32504  | -1.34340 |
| H | -4.56806 | 2.07364  | -0.89817 |
| C | -3.33498 | 2.87642  | 0.68880  |
| H | -3.56780 | 3.92091  | 0.44994  |
| H | -3.98200 | 2.56184  | 1.51561  |
| H | -2.29530 | 2.82618  | 1.02561  |
| C | -4.15487 | -0.48097 | -0.04815 |
| C | -5.64798 | -0.48997 | -0.07029 |

|   |          |          |          |
|---|----------|----------|----------|
| H | -6.03979 | -1.22029 | -0.78976 |
| H | -6.06931 | -0.74053 | 0.91187  |
| H | -6.02909 | 0.49437  | -0.35268 |

4s\_Senantiomer\_conformer-025

|   |          |          |          |
|---|----------|----------|----------|
| C | -2.26398 | 0.88091  | -0.03851 |
| N | -3.08648 | -0.99502 | -0.94723 |
| H | -3.70755 | -1.61747 | -1.44640 |
| C | -1.95526 | -1.37924 | -0.30340 |
| C | -1.40443 | -0.23775 | 0.28060  |
| C | -0.36501 | -2.83160 | 0.90563  |
| C | -1.40713 | -2.76553 | -0.22848 |
| H | 0.21086  | -3.76059 | 0.82500  |
| H | -0.89212 | -2.86392 | 1.86645  |
| H | -2.20650 | -3.49471 | -0.05014 |
| H | -0.94976 | -3.04414 | -1.18795 |
| C | -0.16824 | -0.30424 | 1.03154  |
| O | 0.28404  | 0.62806  | 1.70786  |
| C | 0.59710  | -1.62408 | 0.91076  |
| H | 1.23897  | -1.69019 | 1.79544  |
| C | 1.50663  | -1.66743 | -0.35399 |
| H | 2.03637  | -2.63006 | -0.31401 |
| H | 0.87886  | -1.68575 | -1.25114 |
| C | 4.52580  | 0.52425  | 0.15407  |
| C | 3.36824  | -0.36652 | 0.59404  |
| N | 2.49777  | -0.62118 | -0.55123 |
| C | 2.01405  | 0.62813  | -1.13934 |
| C | 3.21496  | 1.47880  | -1.53956 |
| O | 4.05258  | 1.74310  | -0.41556 |
| H | 5.14614  | -0.01351 | -0.58096 |
| H | 5.14958  | 0.80233  | 1.00856  |
| H | 2.82811  | 0.12031  | 1.42240  |
| H | 3.76289  | -1.32191 | 0.96174  |
| H | 1.41671  | 0.39470  | -2.02841 |
| H | 1.38526  | 1.21092  | -0.44966 |
| H | 3.79281  | 0.95949  | -2.32094 |
| H | 2.89247  | 2.45141  | -1.92250 |
| C | -2.06965 | 2.30448  | 0.39700  |
| H | -1.01873 | 2.58454  | 0.25967  |
| H | -2.65989 | 2.96970  | -0.24454 |
| C | -2.45380 | 2.53756  | 1.86680  |
| H | -1.83116 | 1.91642  | 2.51695  |
| H | -2.30774 | 3.58704  | 2.14878  |
| H | -3.50468 | 2.27933  | 2.04079  |
| C | -3.29528 | 0.37830  | -0.80217 |

|   |          |         |          |
|---|----------|---------|----------|
| C | -4.48329 | 1.03544 | -1.42408 |
| H | -4.45355 | 2.11392 | -1.25116 |
| H | -4.51918 | 0.87001 | -2.50839 |
| H | -5.42448 | 0.65742 | -1.00432 |

4s\_Senantiomer\_conformer-026

|   |          |          |          |
|---|----------|----------|----------|
| C | -3.25486 | 0.40967  | 0.18170  |
| N | -3.13945 | -1.66650 | -0.65381 |
| H | -3.42434 | -2.53661 | -1.08300 |
| C | -1.89914 | -1.41021 | -0.16911 |
| C | -1.91952 | -0.11897 | 0.35948  |
| C | 0.26815  | -1.88753 | 0.89528  |
| C | -0.72874 | -2.33301 | -0.19001 |
| H | 1.20079  | -2.44847 | 0.78270  |
| H | -0.14689 | -2.14879 | 1.87619  |
| H | -1.04032 | -3.36970 | -0.01621 |
| H | -0.24995 | -2.31765 | -1.17913 |
| C | -0.73878 | 0.46921  | 0.95080  |
| O | -0.70056 | 1.59963  | 1.44924  |
| C | 0.54867  | -0.37051 | 0.87307  |
| H | 1.12702  | -0.09306 | 1.76065  |
| C | 1.36635  | 0.10249  | -0.36000 |
| H | 1.25604  | -0.62495 | -1.18667 |
| H | 0.96098  | 1.05204  | -0.72473 |
| C | 4.90072  | 1.27572  | -0.84721 |
| C | 3.44740  | 0.97725  | -1.19438 |
| N | 2.77635  | 0.34646  | -0.05545 |
| C | 3.50041  | -0.86591 | 0.32932  |
| C | 4.95587  | -0.52909 | 0.63504  |
| O | 5.59585  | 0.08833  | -0.47719 |
| H | 4.94031  | 2.00527  | -0.02274 |
| H | 5.42631  | 1.69087  | -1.71155 |
| H | 3.41735  | 0.33009  | -2.09267 |
| H | 2.92938  | 1.91159  | -1.43960 |
| H | 3.04595  | -1.29530 | 1.22684  |
| H | 3.46076  | -1.63174 | -0.47036 |
| H | 4.99952  | 0.13882  | 1.51009  |
| H | 5.52095  | -1.43842 | 0.85728  |
| C | -3.72646 | 1.78087  | 0.57062  |
| H | -4.82262 | 1.80362  | 0.58630  |
| H | -3.38824 | 2.00428  | 1.58835  |
| C | -3.20566 | 2.87766  | -0.37206 |
| H | -3.57338 | 3.86450  | -0.06700 |
| H | -2.11206 | 2.89907  | -0.35378 |
| H | -3.53169 | 2.69396  | -1.40216 |

|   |          |          |          |
|---|----------|----------|----------|
| C | -3.98459 | -0.57201 | -0.45190 |
| C | -5.40634 | -0.61778 | -0.90608 |
| H | -5.48338 | -0.70846 | -1.99725 |
| H | -5.94582 | -1.46745 | -0.46856 |
| H | -5.92795 | 0.29614  | -0.61194 |

4s\_Senantiomer\_conformer-027

|   |          |          |          |
|---|----------|----------|----------|
| C | 3.19151  | 0.42236  | 0.31290  |
| N | 3.04255  | -1.81191 | 0.39922  |
| H | 3.30350  | -2.77831 | 0.54233  |
| C | 1.83866  | -1.39431 | -0.06506 |
| C | 1.88285  | -0.00150 | -0.13651 |
| C | -0.26278 | -1.45779 | -1.34611 |
| C | 0.67692  | -2.25638 | -0.42462 |
| H | -1.19644 | -2.01240 | -1.47919 |
| H | 0.20580  | -1.37701 | -2.33434 |
| H | 1.00659  | -3.17496 | -0.92434 |
| H | 0.14436  | -2.57457 | 0.48259  |
| C | 0.73273  | 0.76664  | -0.55734 |
| O | 0.71679  | 1.99900  | -0.65087 |
| C | -0.55371 | -0.03379 | -0.82773 |
| H | -1.08858 | 0.53213  | -1.59780 |
| C | -1.43339 | 0.00661  | 0.45161  |
| H | -1.35476 | -0.95512 | 0.99343  |
| H | -1.05475 | 0.77800  | 1.13034  |
| C | -4.96640 | -0.23147 | -0.86627 |
| C | -3.52361 | -0.66092 | -0.62292 |
| N | -2.83008 | 0.34736  | 0.17994  |
| C | -3.55951 | 0.56344  | 1.43157  |
| C | -4.99779 | 0.97079  | 1.13650  |
| O | -5.66346 | -0.01889 | 0.35714  |
| H | -5.51171 | -1.00978 | -1.40707 |
| H | -4.97555 | 0.69164  | -1.46755 |
| H | -3.02366 | -0.76712 | -1.58997 |
| H | -3.51401 | -1.65093 | -0.12562 |
| H | -3.56507 | -0.34804 | 2.06070  |
| H | -3.06250 | 1.35765  | 2.00049  |
| H | -5.56718 | 1.07544  | 2.06414  |
| H | -5.00545 | 1.93487  | 0.60357  |
| C | 3.69391  | 1.83564  | 0.37422  |
| H | 2.92710  | 2.47124  | 0.83064  |
| H | 4.57764  | 1.88617  | 1.02139  |
| C | 4.04083  | 2.40358  | -1.01130 |
| H | 3.15193  | 2.40347  | -1.64904 |
| H | 4.40718  | 3.43399  | -0.93273 |

|   |         |          |          |
|---|---------|----------|----------|
| H | 4.81601 | 1.80049  | -1.49764 |
| C | 3.88580 | -0.72287 | 0.63553  |
| C | 5.27520 | -0.93424 | 1.14026  |
| H | 5.76431 | 0.02666  | 1.31720  |
| H | 5.28471 | -1.49457 | 2.08375  |
| H | 5.88933 | -1.49273 | 0.42202  |

4s\_Senantiomer\_conformer-028

|   |          |          |          |
|---|----------|----------|----------|
| C | 3.37088  | 0.29653  | -0.23638 |
| N | 3.12329  | -1.92098 | -0.02458 |
| H | 3.35710  | -2.90021 | 0.06982  |
| C | 1.86238  | -1.42235 | -0.04864 |
| C | 1.96373  | -0.03873 | -0.17933 |
| C | -0.52192 | -1.25969 | 0.51929  |
| C | 0.59125  | -2.19480 | 0.02066  |
| H | -0.36555 | -1.04990 | 1.58557  |
| H | -1.48194 | -1.77296 | 0.43061  |
| H | 0.32896  | -2.58409 | -0.97470 |
| H | 0.68964  | -3.06510 | 0.68003  |
| C | 0.78800  | 0.79796  | -0.29401 |
| O | 0.84120  | 2.02284  | -0.45787 |
| C | -0.57615 | 0.07262  | -0.24998 |
| H | -0.80978 | -0.15589 | -1.30274 |
| C | -1.65195 | 1.05242  | 0.27621  |
| H | -1.44888 | 1.26952  | 1.33228  |
| H | -1.51489 | 1.99090  | -0.26962 |
| C | -5.13882 | -0.14826 | 1.10497  |
| C | -3.61707 | -0.17794 | 1.21271  |
| N | -3.05659 | 0.67282  | 0.16933  |
| C | -3.49083 | 0.24907  | -1.15404 |
| C | -5.01660 | 0.23994  | -1.20541 |
| O | -5.56453 | -0.58937 | -0.18330 |
| H | -5.50297 | 0.87488  | 1.28938  |
| H | -5.59513 | -0.82637 | 1.83189  |
| H | -3.29291 | -1.23106 | 1.14219  |
| H | -3.30568 | 0.20227  | 2.19210  |
| H | -3.10482 | 0.95170  | -1.90218 |
| H | -3.11958 | -0.75933 | -1.41898 |
| H | -5.39122 | 1.26954  | -1.09103 |
| H | -5.37236 | -0.16405 | -2.15756 |
| C | 3.95442  | 1.67587  | -0.34097 |
| H | 5.00893  | 1.60875  | -0.63384 |
| H | 3.43789  | 2.22825  | -1.13353 |
| C | 3.83756  | 2.47227  | 0.96850  |
| H | 4.27878  | 3.47030  | 0.86151  |

|   |         |          |          |
|---|---------|----------|----------|
| H | 2.78525 | 2.59090  | 1.24286  |
| H | 4.35271 | 1.95604  | 1.78662  |
| C | 4.06165 | -0.89141 | -0.13403 |
| C | 5.52393 | -1.19381 | -0.11316 |
| H | 6.10294 | -0.27873 | -0.25885 |
| H | 5.83533 | -1.63593 | 0.84211  |
| H | 5.80516 | -1.89827 | -0.90630 |

4s\_Senantiomer\_conformer-029

|   |          |          |          |
|---|----------|----------|----------|
| C | -3.36557 | 0.27069  | -0.22832 |
| N | -3.11783 | -1.89590 | 0.28936  |
| H | -3.34948 | -2.86085 | 0.48318  |
| C | -1.85856 | -1.39484 | 0.24094  |
| C | -1.96047 | -0.04125 | -0.07414 |
| C | 0.55270  | -1.39429 | -0.22645 |
| C | -0.58972 | -2.13360 | 0.48842  |
| H | 0.45257  | -1.53873 | -1.31023 |
| H | 1.50409  | -1.84119 | 0.07030  |
| H | -0.38125 | -2.17964 | 1.56798  |
| H | -0.65777 | -3.17040 | 0.13874  |
| C | -0.78759 | 0.80054  | -0.18049 |
| O | -0.84245 | 2.01161  | -0.42550 |
| C | 0.57390  | 0.11471  | 0.07729  |
| H | 0.75066  | 0.23765  | 1.15846  |
| C | 1.68075  | 0.88757  | -0.67870 |
| H | 1.53848  | 0.74784  | -1.75758 |
| H | 1.51608  | 1.94993  | -0.47487 |
| C | 5.20469  | -0.46462 | -0.87932 |
| C | 3.69112  | -0.55195 | -1.05184 |
| N | 3.07607  | 0.58562  | -0.37808 |
| C | 3.43526  | 0.62741  | 1.03207  |
| C | 4.95587  | 0.65976  | 1.16462  |
| O | 5.55725  | -0.45083 | 0.50307  |
| H | 5.58119  | 0.44653  | -1.37074 |
| H | 5.69872  | -1.33686 | -1.31705 |
| H | 3.36105  | -1.52816 | -0.65542 |
| H | 3.43507  | -0.52027 | -2.11682 |
| H | 3.01021  | 1.53075  | 1.48565  |
| H | 3.04746  | -0.24358 | 1.59409  |
| H | 5.33913  | 1.60026  | 0.73790  |
| H | 5.25731  | 0.59687  | 2.21418  |
| C | -3.95267 | 1.61736  | -0.53882 |
| H | -3.38180 | 2.08311  | -1.34948 |
| H | -4.98062 | 1.49666  | -0.90119 |
| C | -3.94676 | 2.56300  | 0.67296  |

|   |          |          |          |
|---|----------|----------|----------|
| H | -4.38729 | 3.53356  | 0.41555  |
| H | -4.52029 | 2.13629  | 1.50375  |
| H | -2.92021 | 2.73134  | 1.01130  |
| C | -4.05502 | -0.89958 | 0.00460  |
| C | -5.51520 | -1.21239 | -0.00591 |
| H | -6.08889 | -0.33443 | -0.31253 |
| H | -5.75164 | -2.02729 | -0.70195 |
| H | -5.87532 | -1.51487 | 0.98593  |

4s\_Senantiomer\_conformer-030

|   |          |          |          |
|---|----------|----------|----------|
| C | 3.04902  | -0.65739 | -0.26384 |
| N | 3.62487  | 1.34425  | 0.56344  |
| H | 4.19800  | 2.10013  | 0.91360  |
| C | 2.28661  | 1.41723  | 0.35394  |
| C | 1.87843  | 0.18644  | -0.15800 |
| C | 0.13399  | 2.44583  | -0.23639 |
| C | 1.40350  | 2.58877  | 0.61720  |
| H | 0.38094  | 2.63910  | -1.28861 |
| H | -0.60093 | 3.19920  | 0.06646  |
| H | 1.12786  | 2.62322  | 1.68214  |
| H | 1.91742  | 3.53166  | 0.39628  |
| C | 0.49323  | -0.07245 | -0.49265 |
| O | 0.10249  | -1.12572 | -1.00745 |
| C | -0.50147 | 1.04465  | -0.11755 |
| H | -0.73397 | 0.88549  | 0.94737  |
| C | -1.82877 | 0.95142  | -0.89411 |
| H | -2.11501 | 1.95588  | -1.22507 |
| H | -1.68936 | 0.33820  | -1.80013 |
| C | -3.96066 | -1.39173 | 1.15901  |
| C | -2.80615 | -0.97035 | 0.25855  |
| N | -2.93568 | 0.45064  | -0.07402 |
| C | -4.22566 | 0.67507  | -0.72666 |
| C | -5.35560 | 0.21753  | 0.18914  |
| O | -5.22060 | -1.15812 | 0.53363  |
| H | -3.90715 | -0.83794 | 2.11019  |
| H | -3.91317 | -2.46344 | 1.37194  |
| H | -2.80395 | -1.59809 | -0.65160 |
| H | -1.85701 | -1.14376 | 0.77231  |
| H | -4.33913 | 1.74466  | -0.93892 |
| H | -4.29763 | 0.13148  | -1.68920 |
| H | -5.35719 | 0.83374  | 1.10261  |
| H | -6.32385 | 0.32217  | -0.30857 |
| C | 3.07822  | -2.08311 | -0.73363 |
| H | 2.50070  | -2.17042 | -1.66036 |
| H | 4.10891  | -2.37242 | -0.97089 |

|   |         |          |          |
|---|---------|----------|----------|
| C | 2.49811 | -3.06141 | 0.30051  |
| H | 2.54134 | -4.09321 | -0.06781 |
| H | 3.05632 | -3.01014 | 1.24230  |
| H | 1.45199 | -2.81495 | 0.50506  |
| C | 4.11323 | 0.08824  | 0.19503  |
| C | 5.56448 | -0.23324 | 0.33796  |
| H | 5.77113 | -1.23420 | -0.04839 |
| H | 6.19459 | 0.47574  | -0.21408 |
| H | 5.88658 | -0.20859 | 1.38700  |

4s\_Senantiomer\_conformer-031

|   |          |          |          |
|---|----------|----------|----------|
| C | -2.64187 | 0.72054  | 0.28627  |
| N | -3.34231 | -1.22895 | -0.56992 |
| H | -3.94043 | -1.91513 | -1.01024 |
| C | -2.07455 | -1.46123 | -0.14982 |
| C | -1.59288 | -0.27053 | 0.39430  |
| C | 0.17390  | -2.43098 | -0.22894 |
| C | -1.32881 | -2.75008 | -0.21433 |
| H | 0.43425  | -1.98501 | -1.19342 |
| H | 0.75593  | -3.35518 | -0.14228 |
| H | -1.57377 | -3.37391 | 0.65855  |
| H | -1.61265 | -3.32760 | -1.10193 |
| C | -0.28040 | -0.19498 | 0.99625  |
| O | 0.13519  | 0.79735  | 1.60710  |
| C | 0.58565  | -1.47131 | 0.90199  |
| H | 0.40171  | -1.98378 | 1.86065  |
| C | 2.08890  | -1.14812 | 0.88597  |
| H | 2.26615  | -0.36017 | 1.63164  |
| H | 2.63331  | -2.03808 | 1.22140  |
| C | 2.59370  | 1.66874  | -0.48997 |
| C | 2.05338  | 0.37026  | -1.08746 |
| N | 2.61142  | -0.83103 | -0.44998 |
| C | 4.07650  | -0.73573 | -0.47151 |
| C | 4.59698  | 0.58108  | 0.11221  |
| O | 4.02304  | 1.69856  | -0.56672 |
| H | 2.26650  | 1.77381  | 0.55388  |
| H | 2.23681  | 2.53625  | -1.05422 |
| H | 2.33289  | 0.33492  | -2.14906 |
| H | 0.96165  | 0.34970  | -1.04042 |
| H | 4.50285  | -1.58716 | 0.07106  |
| H | 4.40448  | -0.80339 | -1.51766 |
| H | 4.37267  | 0.64302  | 1.18908  |
| H | 5.68085  | 0.66351  | -0.01634 |
| C | -2.54657 | 2.15996  | 0.70157  |
| H | -3.54701 | 2.60833  | 0.71146  |



|   |          |         |          |
|---|----------|---------|----------|
| H | -2.16096 | 2.21713 | 1.72541  |
| C | -1.62683 | 2.98244 | -0.21565 |
| H | -0.60995 | 2.57944 | -0.18970 |
| H | -1.58718 | 4.02983 | 0.10585  |
| H | -1.98306 | 2.95524 | -1.25169 |
| C | -3.70951 | 0.09689 | -0.32149 |
| C | -5.05721 | 0.59769 | -0.72478 |
| H | -5.19661 | 0.56196 | -1.81300 |
| H | -5.86304 | 0.00574 | -0.27253 |
| H | -5.18710 | 1.63521 | -0.40785 |

4s\_Senantiomer\_conformer-032

|   |          |          |          |
|---|----------|----------|----------|
| C | 2.35918  | -0.04845 | 0.05948  |
| N | 1.53877  | -0.32222 | -2.00765 |
| H | 1.44684  | -0.65314 | -2.95870 |
| C | 0.73973  | 0.61035  | -1.43120 |
| C | 1.21096  | 0.81249  | -0.13300 |
| C | -0.78418 | 2.53711  | -1.25453 |
| C | -0.42857 | 1.27990  | -2.06869 |
| H | -1.76621 | 2.91364  | -1.56365 |
| H | -0.05450 | 3.32071  | -1.49354 |
| H | -0.20381 | 1.55290  | -3.10753 |
| H | -1.27819 | 0.58964  | -2.08724 |
| C | 0.53143  | 1.69979  | 0.78373  |
| O | 0.90296  | 1.91964  | 1.94404  |
| C | -0.77277 | 2.32549  | 0.27254  |
| H | -0.83935 | 3.30761  | 0.75708  |
| C | -1.99344 | 1.52518  | 0.79296  |
| H | -2.00246 | 1.57315  | 1.89440  |
| H | -2.89456 | 2.04311  | 0.44610  |
| C | -3.26090 | -1.69435 | -0.71344 |
| C | -3.37336 | -0.31197 | -0.07704 |
| N | -2.04454 | 0.14122  | 0.32426  |
| C | -1.45544 | -0.81701 | 1.25675  |
| C | -1.37341 | -2.18392 | 0.59157  |
| O | -2.66132 | -2.63336 | 0.17469  |
| H | -2.66480 | -1.62105 | -1.63754 |
| H | -4.25025 | -2.08892 | -0.96206 |
| H | -4.07322 | -0.36194 | 0.77970  |
| H | -3.78761 | 0.38938  | -0.80966 |
| H | -0.45164 | -0.49349 | 1.53425  |
| H | -2.05540 | -0.89513 | 2.18466  |
| H | -0.69486 | -2.12460 | -0.27425 |
| H | -0.99290 | -2.93496 | 1.28960  |
| C | 3.16736  | -0.19520 | 1.31674  |

|   |         |          |          |
|---|---------|----------|----------|
| H | 4.12527 | -0.67466 | 1.08235  |
| H | 3.39904 | 0.79761  | 1.71786  |
| C | 2.44587 | -1.00792 | 2.40402  |
| H | 2.17588 | -2.00335 | 2.03315  |
| H | 1.53169 | -0.49355 | 2.71365  |
| H | 3.08251 | -1.13255 | 3.28804  |
| C | 2.53283 | -0.74088 | -1.11861 |
| C | 3.53127 | -1.77245 | -1.52907 |
| H | 3.05638 | -2.74063 | -1.73432 |
| H | 4.07332 | -1.47578 | -2.43607 |
| H | 4.26673 | -1.92611 | -0.73571 |

4s\_Senantiomer\_conformer-033

|   |          |          |          |
|---|----------|----------|----------|
| C | -2.62454 | 0.69065  | -0.18235 |
| N | -3.22914 | -1.43564 | -0.55263 |
| H | -3.78359 | -2.23129 | -0.83939 |
| C | -1.97538 | -1.50741 | -0.04124 |
| C | -1.55523 | -0.20120 | 0.21142  |
| C | 0.30523  | -2.37610 | 0.19919  |
| C | -1.18650 | -2.74257 | 0.23090  |
| H | 0.60066  | -2.16743 | -0.83344 |
| H | 0.90846  | -3.22743 | 0.53323  |
| H | -1.45219 | -3.15112 | 1.21768  |
| H | -1.41001 | -3.52590 | -0.50286 |
| C | -0.26193 | 0.07530  | 0.79654  |
| O | 0.11369  | 1.20900  | 1.11934  |
| C | 0.62999  | -1.15467 | 1.07769  |
| H | 0.38483  | -1.41886 | 2.11992  |
| C | 2.12685  | -0.80553 | 1.08013  |
| H | 2.24496  | 0.15071  | 1.60940  |
| H | 2.65205  | -1.56643 | 1.66836  |
| C | 2.73820  | 1.58406  | -0.91533 |
| C | 2.23517  | 0.17061  | -1.20669 |
| N | 2.74252  | -0.82678 | -0.25354 |
| C | 4.20588  | -0.71993 | -0.19757 |
| C | 4.68941  | 0.70705  | 0.07657  |
| O | 4.16946  | 1.61349  | -0.89650 |
| H | 2.33727  | 1.94119  | 0.04365  |
| H | 2.42720  | 2.27896  | -1.70183 |
| H | 2.58664  | -0.12412 | -2.20469 |
| H | 1.14278  | 0.14886  | -1.22820 |
| H | 4.59009  | -1.40537 | 0.56638  |
| H | 4.60567  | -1.03915 | -1.16961 |
| H | 4.38980  | 1.03067  | 1.08625  |
| H | 5.78001  | 0.76980  | 0.00732  |

|   |          |          |          |
|---|----------|----------|----------|
| C | -2.62394 | 2.18783  | -0.06807 |
| H | -1.65433 | 2.57422  | -0.40075 |
| H | -3.38239 | 2.60947  | -0.73858 |
| C | -2.88265 | 2.67632  | 1.36620  |
| H | -3.85282 | 2.31979  | 1.73069  |
| H | -2.88038 | 3.77175  | 1.41402  |
| H | -2.10267 | 2.30199  | 2.03562  |
| C | -3.64634 | -0.10548 | -0.65175 |
| C | -4.99550 | 0.22933  | -1.19704 |
| H | -5.13859 | -0.17539 | -2.20705 |
| H | -5.80075 | -0.17067 | -0.56743 |
| H | -5.12400 | 1.31313  | -1.24997 |

4s\_Senantiomer\_conformer-034

|   |          |          |          |
|---|----------|----------|----------|
| C | 2.15654  | 0.42251  | -0.17917 |
| N | 1.25304  | 1.11146  | 1.75169  |
| H | 1.07761  | 1.67581  | 2.57208  |
| C | 0.62925  | -0.05933 | 1.46775  |
| C | 1.16355  | -0.53163 | 0.26829  |
| C | -0.62649 | -2.15233 | 1.80710  |
| C | -0.45077 | -0.69553 | 2.27292  |
| H | -1.56109 | -2.56001 | 2.20964  |
| H | 0.18911  | -2.75136 | 2.23079  |
| H | -0.21060 | -0.66776 | 3.34344  |
| H | -1.38301 | -0.13790 | 2.13432  |
| C | 0.63119  | -1.70781 | -0.38146 |
| O | 1.06095  | -2.17010 | -1.44689 |
| C | -0.60433 | -2.33372 | 0.27638  |
| H | -0.55025 | -3.40730 | 0.05708  |
| C | -1.89091 | -1.82767 | -0.42482 |
| H | -1.88111 | -2.17511 | -1.47087 |
| H | -2.74365 | -2.31356 | 0.06249  |
| C | -3.43958 | 1.55566  | 0.20067  |
| C | -3.43476 | 0.04940  | -0.04430 |
| N | -2.07415 | -0.37945 | -0.35215 |
| C | -1.58039 | 0.33884  | -1.52490 |
| C | -1.61287 | 1.83557  | -1.24701 |
| O | -2.93222 | 2.27075  | -0.92228 |
| H | -2.83136 | 1.77963  | 1.09204  |
| H | -4.45763 | 1.91929  | 0.36714  |
| H | -4.14335 | -0.18875 | -0.86139 |
| H | -3.77921 | -0.46410 | 0.86011  |
| H | -0.55523 | 0.03389  | -1.74218 |
| H | -2.19545 | 0.11755  | -2.41921 |
| H | -0.92358 | 2.06432  | -0.41898 |

|   |          |          |          |
|---|----------|----------|----------|
| H | -1.30818 | 2.40367  | -2.13051 |
| C | 2.99492  | 0.31597  | -1.41963 |
| H | 2.35256  | 0.05699  | -2.26909 |
| H | 3.44407  | 1.29035  | -1.64592 |
| C | 4.10192  | -0.74356 | -1.30251 |
| H | 3.65873  | -1.72910 | -1.13235 |
| H | 4.70042  | -0.78965 | -2.22008 |
| H | 4.77345  | -0.51611 | -0.46669 |
| C | 2.18777  | 1.42809  | 0.76154  |
| C | 3.00413  | 2.67430  | 0.86101  |
| H | 3.64169  | 2.78172  | -0.01983 |
| H | 2.37302  | 3.56964  | 0.92906  |
| H | 3.65595  | 2.66625  | 1.74429  |

4s\_Senantiomer\_conformer-035

|   |          |          |          |
|---|----------|----------|----------|
| C | 3.10921  | 0.44984  | -0.06505 |
| N | 2.92206  | -1.70567 | 0.51786  |
| H | 3.16656  | -2.61963 | 0.87469  |
| C | 1.73721  | -1.39184 | -0.06310 |
| C | 1.80384  | -0.04922 | -0.43983 |
| C | -0.30621 | -1.74081 | -1.39004 |
| C | 0.57521  | -2.30549 | -0.26250 |
| H | -1.25635 | -2.28014 | -1.42349 |
| H | 0.20350  | -1.89770 | -2.34827 |
| H | 0.90957  | -3.32062 | -0.50674 |
| H | -0.00763 | -2.38765 | 0.66633  |
| C | 0.68269  | 0.60756  | -1.07770 |
| O | 0.68078  | 1.78966  | -1.44083 |
| C | -0.59018 | -0.23895 | -1.22179 |
| H | -1.09705 | 0.13339  | -2.11886 |
| C | -1.48198 | 0.06675  | 0.00614  |
| H | -0.94084 | -0.21418 | 0.91613  |
| H | -1.62431 | 1.15806  | 0.05495  |
| C | -4.07238 | 0.40041  | 1.79367  |
| C | -3.35023 | -0.85847 | 1.31029  |
| N | -2.73295 | -0.69218 | -0.01112 |
| C | -3.73516 | -0.17679 | -0.95482 |
| C | -4.45443 | 1.06845  | -0.43149 |
| O | -5.05301 | 0.81278  | 0.84030  |
| H | -3.35296 | 1.21730  | 1.96702  |
| H | -4.60904 | 0.21121  | 2.72849  |
| H | -4.08486 | -1.67175 | 1.23807  |
| H | -2.58320 | -1.16191 | 2.03114  |
| H | -3.26025 | 0.03534  | -1.91765 |
| H | -4.47945 | -0.96645 | -1.12007 |

|   |          |          |          |
|---|----------|----------|----------|
| H | -3.75596 | 1.91650  | -0.34895 |
| H | -5.26664 | 1.36054  | -1.10403 |
| C | 3.60847  | 1.85439  | -0.24436 |
| H | 4.70045  | 1.87365  | -0.14645 |
| H | 3.37383  | 2.19583  | -1.25860 |
| C | 2.98795  | 2.83701  | 0.76187  |
| H | 3.37485  | 3.85159  | 0.60979  |
| H | 3.21320  | 2.53510  | 1.79108  |
| H | 1.90118  | 2.86280  | 0.63924  |
| C | 3.77611  | -0.59995 | 0.52794  |
| C | 5.14369  | -0.70342 | 1.11865  |
| H | 5.73167  | -1.50050 | 0.64594  |
| H | 5.68650  | 0.23547  | 0.98540  |
| H | 5.10839  | -0.91755 | 2.19466  |

4s\_Senantiomer\_conformer-036

|   |          |          |          |
|---|----------|----------|----------|
| C | 3.02541  | 0.32022  | 0.46314  |
| N | 2.79237  | -1.87117 | 0.05756  |
| H | 3.00363  | -2.85914 | 0.01674  |
| C | 1.65901  | -1.30013 | -0.42142 |
| C | 1.75807  | 0.07300  | -0.18996 |
| C | -0.29890 | -0.98339 | -1.87979 |
| C | 0.51056  | -2.00454 | -1.06182 |
| H | -1.24649 | -1.42795 | -2.19464 |
| H | 0.26747  | -0.72589 | -2.78286 |
| H | 0.85826  | -2.82300 | -1.70335 |
| H | -0.12858 | -2.46467 | -0.29439 |
| C | 0.68027  | 0.97312  | -0.54134 |
| O | 0.70747  | 2.19664  | -0.36484 |
| C | -0.58771 | 0.30671  | -1.09412 |
| H | -1.04281 | 1.04235  | -1.76642 |
| C | -1.54354 | 0.07875  | 0.10189  |
| H | -1.05376 | -0.58038 | 0.82677  |
| H | -1.68388 | 1.04663  | 0.60898  |
| C | -4.22513 | -0.31207 | 1.73575  |
| C | -3.48383 | -1.26313 | 0.79452  |
| N | -2.79534 | -0.56528 | -0.29800 |
| C | -3.74238 | 0.33131  | -0.97608 |
| C | -4.48331 | 1.25276  | -0.00454 |
| O | -5.15088 | 0.49463  | 1.00577  |
| H | -3.51241 | 0.33245  | 2.27566  |
| H | -4.81246 | -0.86761 | 2.47337  |
| H | -4.21740 | -1.94721 | 0.34707  |
| H | -2.75814 | -1.86606 | 1.35120  |
| H | -3.21476 | 0.92140  | -1.73171 |

|   |          |          |          |
|---|----------|----------|----------|
| H | -4.48025 | -0.29119 | -1.49845 |
| H | -3.78659 | 1.96493  | 0.46586  |
| H | -5.25669 | 1.82613  | -0.52460 |
| C | 3.56646  | 1.65895  | 0.87415  |
| H | 2.78357  | 2.22021  | 1.39640  |
| H | 4.38878  | 1.52175  | 1.58639  |
| C | 4.05697  | 2.49485  | -0.31877 |
| H | 4.45082  | 3.46207  | 0.01520  |
| H | 3.23002  | 2.68178  | -1.01010 |
| H | 4.85142  | 1.97077  | -0.86227 |
| C | 3.64257  | -0.90405 | 0.59962  |
| C | 4.96256  | -1.29392 | 1.17878  |
| H | 5.46621  | -0.41941 | 1.59766  |
| H | 4.85225  | -2.03404 | 1.98158  |
| H | 5.62733  | -1.72958 | 0.42166  |

4s\_Senantiomer\_conformer-037

|   |          |          |          |
|---|----------|----------|----------|
| C | 3.24859  | 0.20079  | -0.05768 |
| N | 2.64835  | -1.95744 | -0.00375 |
| H | 2.71684  | -2.96202 | 0.08901  |
| C | 1.52626  | -1.28618 | -0.36557 |
| C | 1.85089  | 0.07108  | -0.40736 |
| C | -0.60120 | -0.87248 | -1.51636 |
| C | 0.19259  | -1.88143 | -0.66983 |
| H | -1.63316 | -1.20984 | -1.63955 |
| H | -0.15911 | -0.84049 | -2.52002 |
| H | 0.29743  | -2.83255 | -1.20482 |
| H | -0.34584 | -2.10908 | 0.26114  |
| C | 0.86044  | 1.07283  | -0.74401 |
| O | 1.09092  | 2.28657  | -0.80595 |
| C | -0.56988 | 0.55181  | -0.93392 |
| H | -1.05229 | 1.23479  | -1.64150 |
| C | -1.27867 | 0.72733  | 0.44496  |
| H | -0.75509 | 0.13620  | 1.20495  |
| H | -1.14761 | 1.78242  | 0.71897  |
| C | -4.53385 | -1.03238 | 1.19940  |
| C | -3.06348 | -0.97636 | 0.79497  |
| N | -2.69617 | 0.41300  | 0.54380  |
| C | -3.54649 | 1.02282  | -0.47008 |
| C | -5.00702 | 0.89731  | -0.04511 |
| O | -5.36205 | -0.46375 | 0.18736  |
| H | -4.67670 | -0.49085 | 2.14787  |
| H | -4.86293 | -2.06763 | 1.32636  |
| H | -2.92404 | -1.63201 | -0.08216 |
| H | -2.44344 | -1.36870 | 1.60877  |

|   |          |          |          |
|---|----------|----------|----------|
| H | -3.28421 | 2.08280  | -0.56854 |
| H | -3.42285 | 0.55371  | -1.46374 |
| H | -5.17390 | 1.48782  | 0.86965  |
| H | -5.67361 | 1.26324  | -0.83113 |
| C | 4.01719  | 1.48463  | 0.06478  |
| H | 5.09326  | 1.27425  | 0.05047  |
| H | 3.80438  | 2.11809  | -0.80325 |
| C | 3.66565  | 2.26580  | 1.34122  |
| H | 4.24509  | 3.19442  | 1.40548  |
| H | 2.60273  | 2.52455  | 1.34119  |
| H | 3.87663  | 1.66775  | 2.23508  |
| C | 3.71225  | -1.07296 | 0.18963  |
| C | 5.05604  | -1.57988 | 0.59854  |
| H | 5.44050  | -2.32760 | -0.10679 |
| H | 5.77508  | -0.75815 | 0.63883  |
| H | 5.03083  | -2.04889 | 1.59064  |

#### 4s\_Senantiomer\_conformer-038

|   |          |          |          |
|---|----------|----------|----------|
| C | -2.79725 | 0.53737  | 0.15086  |
| N | -3.03623 | -1.41327 | -0.92664 |
| H | -3.43875 | -2.13682 | -1.50694 |
| C | -1.83411 | -1.49541 | -0.30459 |
| C | -1.63873 | -0.29815 | 0.38310  |
| C | 0.51663  | -2.11020 | -0.02794 |
| C | -0.89205 | -2.65063 | -0.31782 |
| H | 0.83744  | -1.51579 | -0.88925 |
| H | 1.22462  | -2.93957 | 0.07497  |
| H | -1.17772 | -3.38656 | 0.44895  |
| H | -0.91754 | -3.17336 | -1.28104 |
| C | -0.47563 | -0.08991 | 1.21997  |
| O | -0.32291 | 0.90579  | 1.93779  |
| C | 0.55787  | -1.23705 | 1.23876  |
| H | 0.23290  | -1.86951 | 2.08318  |
| C | 1.97361  | -0.74326 | 1.62818  |
| H | 1.84262  | -0.06032 | 2.47429  |
| H | 2.55032  | -1.60348 | 1.98555  |
| C | 3.27494  | 1.87055  | -0.76454 |
| C | 2.19286  | 1.07702  | -0.03861 |
| N | 2.79786  | -0.06612 | 0.63252  |
| C | 3.55391  | -0.89999 | -0.29587 |
| C | 4.61070  | -0.04179 | -0.98420 |
| O | 4.00664  | 1.05093  | -1.67358 |
| H | 3.96319  | 2.30945  | -0.02439 |
| H | 2.83284  | 2.67581  | -1.35845 |
| H | 1.41797  | 0.77599  | -0.77005 |

|   |          |          |          |
|---|----------|----------|----------|
| H | 1.70522  | 1.71178  | 0.70618  |
| H | 4.04021  | -1.70796 | 0.26265  |
| H | 2.92875  | -1.36268 | -1.07858 |
| H | 5.32508  | 0.33717  | -0.23592 |
| H | 5.15477  | -0.62159 | -1.73554 |
| C | -3.00009 | 1.93422  | 0.66192  |
| H | -4.04840 | 2.22716  | 0.53001  |
| H | -2.79428 | 1.96022  | 1.73763  |
| C | -2.09103 | 2.95826  | -0.03668 |
| H | -2.27550 | 2.97094  | -1.11693 |
| H | -1.03998 | 2.70457  | 0.13069  |
| H | -2.26570 | 3.96821  | 0.35265  |
| C | -3.64100 | -0.18007 | -0.66911 |
| C | -4.96702 | 0.15294  | -1.26990 |
| H | -5.30843 | 1.12952  | -0.91839 |
| H | -4.92013 | 0.19156  | -2.36594 |
| H | -5.73249 | -0.58624 | -1.00133 |

4s\_Senantiomer\_conformer-039

|   |          |          |          |
|---|----------|----------|----------|
| C | -3.19209 | 0.10633  | -0.35742 |
| N | -2.57467 | -1.97763 | 0.18754  |
| H | -2.62512 | -2.97562 | 0.34216  |
| C | -1.48709 | -1.20772 | 0.44166  |
| C | -1.82452 | 0.10707  | 0.11518  |
| C | 0.56278  | -0.46059 | 1.56351  |
| C | -0.17121 | -1.67343 | 0.96799  |
| H | 1.58660  | -0.73137 | 1.83253  |
| H | 0.05827  | -0.17497 | 2.49500  |
| H | -0.30367 | -2.45310 | 1.72736  |
| H | 0.42454  | -2.12593 | 0.16260  |
| C | -0.85882 | 1.18125  | 0.22268  |
| O | -1.09673 | 2.36224  | -0.05785 |
| C | 0.56045  | 0.75888  | 0.62437  |
| H | 0.99336  | 1.61452  | 1.15389  |
| C | 1.35442  | 0.58062  | -0.70639 |
| H | 0.88637  | -0.20407 | -1.31154 |
| H | 1.23241  | 1.52154  | -1.25881 |
| C | 4.66738  | -1.23157 | -0.77028 |
| C | 3.17332  | -1.10892 | -0.48494 |
| N | 2.77826  | 0.28763  | -0.63279 |
| C | 3.55523  | 1.16449  | 0.23343  |
| C | 5.04151  | 0.96900  | -0.05335 |
| O | 5.42269  | -0.39573 | 0.10399  |
| H | 4.86694  | -0.95495 | -1.81763 |
| H | 5.01327  | -2.25492 | -0.59921 |



|   |          |          |          |
|---|----------|----------|----------|
| H | 2.98295  | -1.51381 | 0.52424  |
| H | 2.61125  | -1.71761 | -1.20208 |
| H | 3.27788  | 2.20592  | 0.03190  |
| H | 3.37081  | 0.97072  | 1.30638  |
| H | 5.26314  | 1.30224  | -1.07959 |
| H | 5.65188  | 1.54567  | 0.64734  |
| C | -3.98241 | 1.30682  | -0.79107 |
| H | -3.37226 | 1.91553  | -1.46753 |
| H | -4.86254 | 0.98368  | -1.35965 |
| C | -4.42985 | 2.18348  | 0.38956  |
| H | -5.00729 | 3.04751  | 0.04001  |
| H | -5.05537 | 1.61229  | 1.08501  |
| H | -3.55613 | 2.55308  | 0.93431  |
| C | -3.62819 | -1.19942 | -0.29818 |
| C | -4.94023 | -1.82612 | -0.63842 |
| H | -5.62264 | -1.07797 | -1.04883 |
| H | -4.82935 | -2.62382 | -1.38389 |
| H | -5.42211 | -2.26756 | 0.24355  |

4s\_Senantiomer\_conformer-040

|   |          |          |          |
|---|----------|----------|----------|
| C | -2.87547 | 0.73249  | -0.28417 |
| N | -3.64480 | -1.32227 | 0.17347  |
| H | -4.29240 | -2.08256 | 0.33214  |
| C | -2.29440 | -1.44519 | 0.15018  |
| C | -1.76693 | -0.18446 | -0.12658 |
| C | -0.12065 | -2.51406 | -0.26298 |
| C | -1.50628 | -2.68968 | 0.37717  |
| H | -0.21832 | -2.55727 | -1.35573 |
| H | 0.53147  | -3.34148 | 0.03610  |
| H | -1.39168 | -2.87339 | 1.45623  |
| H | -2.01894 | -3.56579 | -0.03697 |
| C | -0.33890 | 0.03317  | -0.22007 |
| O | 0.16411  | 1.12260  | -0.52018 |
| C | 0.54639  | -1.17953 | 0.13045  |
| H | 0.63501  | -1.17382 | 1.22830  |
| C | 1.97099  | -1.06321 | -0.44648 |
| H | 2.26525  | -2.03678 | -0.85366 |
| H | 1.95966  | -0.35733 | -1.28927 |
| C | 4.86015  | 0.14297  | -0.80393 |
| C | 4.34913  | -0.95350 | 0.13381  |
| N | 2.96830  | -0.73406 | 0.58310  |
| C | 2.85737  | 0.62694  | 1.13153  |
| C | 3.39571  | 1.69877  | 0.18391  |
| O | 4.75112  | 1.42462  | -0.18509 |
| H | 4.29781  | 0.13601  | -1.75175 |

|   |          |          |          |
|---|----------|----------|----------|
| H | 5.92037  | -0.00227 | -1.03456 |
| H | 4.99291  | -0.97070 | 1.02375  |
| H | 4.42005  | -1.93368 | -0.35158 |
| H | 1.81455  | 0.84184  | 1.37432  |
| H | 3.43881  | 0.65647  | 2.06291  |
| H | 2.76364  | 1.76052  | -0.71308 |
| H | 3.40193  | 2.67963  | 0.67005  |
| C | -2.78063 | 2.20579  | -0.55744 |
| H | -2.07040 | 2.37774  | -1.37356 |
| H | -3.75338 | 2.58095  | -0.89695 |
| C | -2.32367 | 3.01048  | 0.67002  |
| H | -2.27290 | 4.08135  | 0.44019  |
| H | -1.32962 | 2.68146  | 0.98702  |
| H | -3.01730 | 2.87237  | 1.50723  |
| C | -4.02405 | -0.00317 | -0.08808 |
| C | -5.46715 | 0.38001  | -0.11300 |
| H | -6.03428 | -0.21884 | -0.83700 |
| H | -5.57599 | 1.43100  | -0.39118 |
| H | -5.94237 | 0.24422  | 0.86707  |

4s\_Senantiomer\_conformer-041

|   |          |          |          |
|---|----------|----------|----------|
| C | -2.72047 | -0.48969 | 0.35003  |
| N | -2.86562 | 1.72074  | 0.69130  |
| H | -3.21431 | 2.61287  | 1.01529  |
| C | -1.71063 | 1.54195  | 0.00357  |
| C | -1.57745 | 0.17483  | -0.23783 |
| C | 0.62809  | 1.94380  | -0.59070 |
| C | -0.75364 | 2.59742  | -0.43468 |
| H | 0.99453  | 1.67760  | 0.40583  |
| H | 1.33803  | 2.66148  | -1.01564 |
| H | -1.07447 | 3.03030  | -1.39430 |
| H | -0.71466 | 3.42262  | 0.28584  |
| C | -0.46189 | -0.35273 | -0.99514 |
| O | -0.35682 | -1.54352 | -1.31337 |
| C | 0.58063  | 0.68256  | -1.47138 |
| H | 0.20656  | 0.99082  | -2.46332 |
| C | 1.96381  | 0.04178  | -1.74579 |
| H | 1.77251  | -0.89231 | -2.28464 |
| H | 2.51932  | 0.70265  | -2.42024 |
| C | 3.41502  | -1.58920 | 1.33393  |
| C | 2.28832  | -1.07278 | 0.44422  |
| N | 2.85103  | -0.26177 | -0.62765 |
| C | 3.67236  | 0.82571  | -0.10611 |
| C | 4.77099  | 0.23795  | 0.77408  |
| O | 4.21212  | -0.52219 | 1.84373  |

|   |          |          |          |
|---|----------|----------|----------|
| H | 4.04785  | -2.28136 | 0.75550  |
| H | 3.01241  | -2.11883 | 2.20227  |
| H | 1.57007  | -0.50740 | 1.06897  |
| H | 1.74468  | -1.91506 | 0.00812  |
| H | 4.12197  | 1.36945  | -0.94481 |
| H | 3.10396  | 1.55276  | 0.49876  |
| H | 5.43045  | -0.40153 | 0.16576  |
| H | 5.36798  | 1.03082  | 1.23413  |
| C | -3.01221 | -1.96221 | 0.31479  |
| H | -2.09165 | -2.51736 | 0.52549  |
| H | -3.72593 | -2.21591 | 1.10782  |
| C | -3.56855 | -2.42758 | -1.04039 |
| H | -2.84117 | -2.22579 | -1.83206 |
| H | -4.49904 | -1.90103 | -1.28166 |
| H | -3.77683 | -3.50406 | -1.03052 |
| C | -3.49825 | 0.49589  | 0.91826  |
| C | -4.78855 | 0.43507  | 1.66741  |
| H | -5.59332 | 0.96103  | 1.13769  |
| H | -5.10208 | -0.60345 | 1.79845  |
| H | -4.70249 | 0.88790  | 2.66339  |

4s\_Senantiomer\_conformer-042

|   |          |          |          |
|---|----------|----------|----------|
| C | 2.86586  | 0.75705  | -0.19053 |
| N | 3.62379  | -1.35208 | -0.19247 |
| H | 4.26632  | -2.13264 | -0.21380 |
| C | 2.27767  | -1.45805 | -0.06614 |
| C | 1.75752  | -0.16437 | -0.06012 |
| C | 0.12508  | -2.38871 | 0.66717  |
| C | 1.48572  | -2.71661 | 0.03373  |
| H | 0.26440  | -2.17717 | 1.73551  |
| H | -0.53553 | -3.25907 | 0.59373  |
| H | 1.33116  | -3.14680 | -0.96742 |
| H | 2.01665  | -3.47472 | 0.62152  |
| C | 0.33292  | 0.07753  | 0.02717  |
| O | -0.16211 | 1.20991  | 0.07899  |
| C | -0.56124 | -1.17824 | 0.00024  |
| H | -0.69275 | -1.42685 | -1.06460 |
| C | -1.96235 | -0.92363 | 0.59064  |
| H | -2.23530 | -1.77388 | 1.22531  |
| H | -1.92026 | -0.04081 | 1.24436  |
| C | -3.42673 | 1.62191  | -0.60125 |
| C | -2.92196 | 0.35835  | -1.29785 |
| N | -3.00224 | -0.83882 | -0.44593 |
| C | -4.36253 | -0.94346 | 0.09759  |
| C | -4.84136 | 0.34155  | 0.77758  |

|   |          |          |          |
|---|----------|----------|----------|
| O | -4.76436 | 1.44583  | -0.12354 |
| H | -3.45820 | 2.46455  | -1.29941 |
| H | -2.75868 | 1.88585  | 0.23067  |
| H | -1.89128 | 0.50730  | -1.62664 |
| H | -3.54164 | 0.17446  | -2.18587 |
| H | -5.04159 | -1.16265 | -0.73764 |
| H | -4.40838 | -1.78520 | 0.79810  |
| H | -5.89062 | 0.25751  | 1.07814  |
| H | -4.24130 | 0.55079  | 1.67802  |
| C | 2.78192  | 2.25600  | -0.19962 |
| H | 3.70748  | 2.67457  | -0.61259 |
| H | 1.96753  | 2.56822  | -0.86253 |
| C | 2.53236  | 2.84669  | 1.19727  |
| H | 3.33465  | 2.56567  | 1.88904  |
| H | 1.58457  | 2.47452  | 1.59708  |
| H | 2.48226  | 3.94127  | 1.15732  |
| C | 4.00738  | -0.01076 | -0.26892 |
| C | 5.44787  | 0.36067  | -0.39910 |
| H | 6.02935  | 0.05347  | 0.47981  |
| H | 5.91113  | -0.10697 | -1.27719 |
| H | 5.55222  | 1.44337  | -0.50300 |

4s\_Senantiomer\_conformer-043

|   |          |          |          |
|---|----------|----------|----------|
| C | 3.03674  | 0.60060  | 0.14860  |
| N | 3.40941  | -1.47832 | -0.60030 |
| H | 3.89990  | -2.28892 | -0.95333 |
| C | 2.09414  | -1.44968 | -0.26967 |
| C | 1.81127  | -0.16724 | 0.19889  |
| C | -0.04859 | -2.30190 | 0.57603  |
| C | 1.12021  | -2.57265 | -0.38345 |
| H | 0.28954  | -2.45375 | 1.60967  |
| H | -0.85323 | -3.02227 | 0.39264  |
| H | 0.74121  | -2.64217 | -1.41448 |
| H | 1.59540  | -3.53491 | -0.15917 |
| C | 0.47880  | 0.20304  | 0.63024  |
| O | 0.19466  | 1.31563  | 1.08801  |
| C | -0.60755 | -0.87247 | 0.43615  |
| H | -0.92738 | -0.75312 | -0.61135 |
| C | -1.83576 | -0.63365 | 1.35507  |
| H | -2.10444 | -1.57980 | 1.84030  |
| H | -1.55617 | 0.07409  | 2.14052  |
| C | -4.25429 | 1.69456  | -0.36651 |
| C | -2.89688 | 1.20060  | 0.12014  |
| N | -3.04908 | -0.12461 | 0.71811  |
| C | -3.64097 | -1.05327 | -0.24078 |

|   |          |          |          |
|---|----------|----------|----------|
| C | -4.98097 | -0.50379 | -0.72015 |
| O | -4.82904 | 0.78680  | -1.30506 |
| H | -4.15652 | 2.65417  | -0.88213 |
| H | -4.93170 | 1.81944  | 0.49338  |
| H | -2.49059 | 1.88552  | 0.86982  |
| H | -2.19397 | 1.19605  | -0.73384 |
| H | -2.99448 | -1.22100 | -1.12352 |
| H | -3.79318 | -2.02320 | 0.24772  |
| H | -5.41160 | -1.14816 | -1.49186 |
| H | -5.67983 | -0.44909 | 0.12981  |
| C | 3.19849  | 2.04500  | 0.52518  |
| H | 2.70237  | 2.22630  | 1.48480  |
| H | 4.26171  | 2.27257  | 0.66733  |
| C | 2.60730  | 3.00205  | -0.52244 |
| H | 1.53492  | 2.81808  | -0.63674 |
| H | 3.08849  | 2.85936  | -1.49672 |
| H | 2.74569  | 4.04732  | -0.22169 |
| C | 4.00637  | -0.23959 | -0.35455 |
| C | 5.45541  | -0.02523 | -0.64518 |
| H | 5.67524  | -0.11984 | -1.71650 |
| H | 5.76119  | 0.97586  | -0.33171 |
| H | 6.08794  | -0.74979 | -0.11661 |

4s\_Senantiomer\_conformer-044

|   |          |          |          |
|---|----------|----------|----------|
| C | 3.32518  | 0.48979  | 0.09818  |
| N | 3.39138  | -1.73003 | -0.20229 |
| H | 3.76112  | -2.66108 | -0.34006 |
| C | 2.08032  | -1.43501 | -0.01819 |
| C | 1.98686  | -0.05624 | 0.16823  |
| C | -0.22316 | -1.75373 | 0.76249  |
| C | 0.94106  | -2.39631 | -0.00585 |
| H | 0.02847  | -1.71268 | 1.83014  |
| H | -1.11711 | -2.37828 | 0.67198  |
| H | 0.62310  | -2.62342 | -1.03481 |
| H | 1.23100  | -3.35020 | 0.45016  |
| C | 0.71189  | 0.59474  | 0.38715  |
| O | 0.59310  | 1.80507  | 0.60159  |
| C | -0.52952 | -0.32428 | 0.27184  |
| H | -0.73359 | -0.36643 | -0.81028 |
| C | -1.76214 | 0.29999  | 0.94569  |
| H | -1.97553 | -0.23088 | 1.89434  |
| H | -1.52328 | 1.33604  | 1.19904  |
| C | -5.20615 | 1.20657  | -0.25414 |
| C | -4.00510 | 1.14005  | 0.68142  |
| N | -2.94355 | 0.33041  | 0.08124  |

|   |          |          |          |
|---|----------|----------|----------|
| C | -3.46256 | -1.00280 | -0.22604 |
| C | -4.68018 | -0.89265 | -1.13722 |
| O | -5.70350 | -0.09618 | -0.54814 |
| H | -4.91798 | 1.71636  | -1.18736 |
| H | -6.02817 | 1.75843  | 0.21015  |
| H | -4.33071 | 0.72604  | 1.65600  |
| H | -3.62274 | 2.15144  | 0.86107  |
| H | -2.69236 | -1.58755 | -0.73847 |
| H | -3.74340 | -1.54940 | 0.69608  |
| H | -4.37580 | -0.45700 | -2.10237 |
| H | -5.11580 | -1.87926 | -1.31780 |
| C | 3.70346  | 1.93880  | 0.20620  |
| H | 3.17984  | 2.38760  | 1.05716  |
| H | 4.77734  | 2.02524  | 0.41030  |
| C | 3.35918  | 2.73858  | -1.06063 |
| H | 3.65187  | 3.78971  | -0.95292 |
| H | 3.87669  | 2.32671  | -1.93452 |
| H | 2.28196  | 2.70099  | -1.24834 |
| C | 4.17088  | -0.57270 | -0.13592 |
| C | 5.65201  | -0.64427 | -0.31217 |
| H | 6.10004  | 0.34082  | -0.16135 |
| H | 6.11355  | -1.33579 | 0.40421  |
| H | 5.92760  | -0.98436 | -1.31880 |

4s\_Senantiomer\_conformer-045

|   |          |          |          |
|---|----------|----------|----------|
| C | -2.77512 | 0.77965  | 0.12283  |
| N | -3.30599 | -1.21106 | -0.75850 |
| H | -3.83557 | -1.93165 | -1.23038 |
| C | -2.10920 | -1.40083 | -0.14879 |
| C | -1.73335 | -0.18069 | 0.41388  |
| C | -0.32786 | -2.56517 | 1.08580  |
| C | -1.34172 | -2.67774 | -0.06830 |
| H | 0.37155  | -3.40766 | 1.05316  |
| H | -0.86888 | -2.62936 | 2.03733  |
| H | -2.01044 | -3.53188 | 0.09082  |
| H | -0.81918 | -2.86688 | -1.01669 |
| C | -0.49519 | -0.04117 | 1.15165  |
| O | -0.19660 | 0.96558  | 1.80482  |
| C | 0.46420  | -1.23920 | 1.04740  |
| H | 1.13208  | -1.19675 | 1.91359  |
| C | 1.34709  | -1.16647 | -0.22814 |
| H | 1.55103  | -2.19141 | -0.55815 |
| H | 0.78720  | -0.67904 | -1.04926 |
| C | 3.94438  | 1.49295  | 0.42903  |
| C | 2.55458  | 0.91224  | 0.20325  |

|   |          |          |          |
|---|----------|----------|----------|
| N | 2.64780  | -0.53342 | -0.01839 |
| C | 3.53981  | -0.79516 | -1.15011 |
| C | 4.90939  | -0.17984 | -0.88731 |
| O | 4.81344  | 1.22414  | -0.66873 |
| H | 4.37174  | 1.07256  | 1.35369  |
| H | 3.89437  | 2.58092  | 0.52811  |
| H | 2.08465  | 1.41817  | -0.66438 |
| H | 1.92893  | 1.10640  | 1.07676  |
| H | 3.64579  | -1.87844 | -1.28076 |
| H | 3.13340  | -0.38022 | -2.09330 |
| H | 5.36662  | -0.66538 | -0.01018 |
| H | 5.56690  | -0.31935 | -1.75003 |
| C | -2.76380 | 2.23485  | 0.49132  |
| H | -3.76712 | 2.65735  | 0.36121  |
| H | -2.50820 | 2.33822  | 1.55142  |
| C | -1.75581 | 3.04636  | -0.33909 |
| H | -1.98819 | 2.97939  | -1.40799 |
| H | -0.74228 | 2.66427  | -0.18320 |
| H | -1.77054 | 4.10392  | -0.05049 |
| C | -3.73126 | 0.11171  | -0.61071 |
| C | -5.01992 | 0.56544  | -1.21338 |
| H | -5.22066 | 1.60459  | -0.94184 |
| H | -5.00161 | 0.50503  | -2.30922 |
| H | -5.86626 | -0.04100 | -0.86663 |

4s\_Senantiomer\_conformer-046

|   |          |          |          |
|---|----------|----------|----------|
| C | 2.40359  | -0.85177 | 0.38947  |
| N | 3.29013  | 0.84220  | -0.77885 |
| H | 3.95463  | 1.38003  | -1.31883 |
| C | 2.10102  | 1.31006  | -0.32228 |
| C | 1.50399  | 0.28085  | 0.40759  |
| C | 0.46314  | 2.94254  | 0.52975  |
| C | 1.54916  | 2.68063  | -0.53174 |
| H | -0.09521 | 3.85013  | 0.27343  |
| H | 0.95258  | 3.12829  | 1.49310  |
| H | 2.33979  | 3.43685  | -0.45986 |
| H | 1.12896  | 2.77266  | -1.54287 |
| C | 0.21860  | 0.46483  | 1.04930  |
| O | -0.29231 | -0.35639 | 1.82102  |
| C | -0.51653 | 1.76049  | 0.69162  |
| H | -1.18572 | 1.97413  | 1.53161  |
| C | -1.38660 | 1.61890  | -0.59390 |
| H | -1.85521 | 2.60113  | -0.75062 |
| H | -0.73543 | 1.43529  | -1.45531 |
| C | -4.55351 | -0.25801 | 0.19445  |

|   |          |          |          |
|---|----------|----------|----------|
| C | -3.34838 | 0.62297  | 0.50937  |
| N | -2.43885 | 0.61541  | -0.63329 |
| C | -2.02616 | -0.74702 | -0.96802 |
| C | -3.27011 | -1.58036 | -1.25657 |
| O | -4.15186 | -1.58611 | -0.13520 |
| H | -5.11952 | 0.17855  | -0.64414 |
| H | -5.21337 | -0.33987 | 1.06304  |
| H | -2.85954 | 0.25663  | 1.42737  |
| H | -3.68572 | 1.65081  | 0.69195  |
| H | -1.38636 | -0.71842 | -1.85776 |
| H | -1.46214 | -1.22929 | -0.15659 |
| H | -3.79143 | -1.17596 | -2.13908 |
| H | -3.00332 | -2.62395 | -1.44751 |
| C | 2.16129  | -2.19362 | 1.01883  |
| H | 3.11772  | -2.70894 | 1.16896  |
| H | 1.71449  | -2.05044 | 2.00761  |
| C | 1.23246  | -3.08687 | 0.18065  |
| H | 1.07605  | -4.05715 | 0.66648  |
| H | 0.25596  | -2.61001 | 0.05121  |
| H | 1.65671  | -3.26578 | -0.81389 |
| C | 3.49659  | -0.47385 | -0.35979 |
| C | 4.73682  | -1.20984 | -0.74658 |
| H | 5.64206  | -0.66194 | -0.45556 |
| H | 4.76522  | -2.18658 | -0.25739 |
| H | 4.79096  | -1.37893 | -1.82983 |

4s\_Senantiomer\_conformer-047

|   |          |          |          |
|---|----------|----------|----------|
| C | -2.27068 | -0.98754 | -0.37483 |
| N | -3.23466 | 0.57137  | 0.91317  |
| H | -3.90047 | 1.01758  | 1.52938  |
| C | -2.15721 | 1.18498  | 0.35750  |
| C | -1.52357 | 0.24612  | -0.45537 |
| C | -0.70687 | 3.00236  | -0.49938 |
| C | -1.73493 | 2.59997  | 0.57818  |
| H | -0.19537 | 3.92244  | -0.19507 |
| H | -1.24024 | 3.22649  | -1.43050 |
| H | -2.59610 | 3.27822  | 0.54659  |
| H | -1.30099 | 2.70930  | 1.58192  |
| C | -0.33973 | 0.58995  | -1.21633 |
| O | 0.12708  | -0.10040 | -2.12748 |
| C | 0.33367  | 1.89959  | -0.79104 |
| H | 0.95749  | 2.22233  | -1.63036 |
| C | 1.22597  | 1.64320  | 0.44338  |
| H | 1.86368  | 2.53456  | 0.60538  |
| H | 0.59041  | 1.54295  | 1.32894  |



|   |          |          |          |
|---|----------|----------|----------|
| C | 3.38858  | -1.22811 | 1.52648  |
| C | 2.64762  | 0.09915  | 1.63390  |
| N | 2.01255  | 0.41807  | 0.35630  |
| C | 3.01543  | 0.44951  | -0.70902 |
| C | 3.75856  | -0.88019 | -0.75605 |
| O | 4.36929  | -1.18926 | 0.49415  |
| H | 2.66585  | -2.03554 | 1.32657  |
| H | 3.91983  | -1.45137 | 2.45597  |
| H | 3.36121  | 0.88763  | 1.94368  |
| H | 1.87490  | 0.02571  | 2.40801  |
| H | 2.51393  | 0.60430  | -1.66691 |
| H | 3.74096  | 1.27189  | -0.55397 |
| H | 3.05395  | -1.67988 | -1.03500 |
| H | 4.56292  | -0.84563 | -1.49614 |
| C | -1.88677 | -2.28319 | -1.02825 |
| H | -2.72465 | -2.98892 | -0.98183 |
| H | -1.67454 | -2.10581 | -2.08802 |
| C | -0.64511 | -2.91525 | -0.37552 |
| H | -0.83805 | -3.15015 | 0.67762  |
| H | 0.20145  | -2.22287 | -0.41962 |
| H | -0.35975 | -3.84239 | -0.88649 |
| C | -3.32084 | -0.75607 | 0.48701  |
| C | -4.41409 | -1.64420 | 0.98299  |
| H | -5.40613 | -1.22634 | 0.76911  |
| H | -4.35405 | -2.62337 | 0.50163  |
| H | -4.35275 | -1.80152 | 2.06762  |

4s\_Senantiomer\_conformer-048

|   |          |          |          |
|---|----------|----------|----------|
| C | 2.26396  | -0.88088 | -0.03851 |
| N | 3.08653  | 0.99505  | -0.94713 |
| H | 3.70761  | 1.61751  | -1.44630 |
| C | 1.95528  | 1.37927  | -0.30336 |
| C | 1.40442  | 0.23777  | 0.28059  |
| C | 0.36500  | 2.83165  | 0.90557  |
| C | 1.40714  | 2.76556  | -0.22851 |
| H | -0.21089 | 3.76064  | 0.82490  |
| H | 0.89210  | 2.86402  | 1.86640  |
| H | 2.20649  | 3.49475  | -0.05019 |
| H | 0.94978  | 3.04412  | -1.18800 |
| C | 0.16821  | 0.30427  | 1.03150  |
| O | -0.28414 | -0.62804 | 1.70775  |
| C | -0.59710 | 1.62412  | 0.91074  |
| H | -1.23892 | 1.69023  | 1.79545  |
| C | -1.50672 | 1.66745  | -0.35397 |
| H | -2.03646 | 2.63008  | -0.31395 |

|   |          |          |          |
|---|----------|----------|----------|
| H | -0.87900 | 1.68579  | -1.25116 |
| C | -4.52579 | -0.52434 | 0.15423  |
| C | -3.36820 | 0.36641  | 0.59416  |
| N | -2.49784 | 0.62118  | -0.55118 |
| C | -2.01415 | -0.62808 | -1.13941 |
| C | -3.21509 | -1.47875 | -1.53959 |
| O | -4.05261 | -1.74314 | -0.41554 |
| H | -5.14621 | 0.01348  | -0.58070 |
| H | -5.14949 | -0.80249 | 1.00876  |
| H | -2.82795 | -0.12050 | 1.42240  |
| H | -3.76281 | 1.32176  | 0.96198  |
| H | -1.41689 | -0.39460 | -2.02851 |
| H | -1.38532 | -1.21092 | -0.44981 |
| H | -3.79301 | -0.95940 | -2.32090 |
| H | -2.89261 | -2.45133 | -1.92262 |
| C | 2.06964  | -2.30448 | 0.39694  |
| H | 1.01867  | -2.58447 | 0.25983  |
| H | 2.65969  | -2.96969 | -0.24480 |
| C | 2.45412  | -2.53770 | 1.86663  |
| H | 2.30806  | -3.58719 | 2.14857  |
| H | 1.83168  | -1.91657 | 2.51698  |
| H | 3.50505  | -2.27955 | 2.04039  |
| C | 3.29532  | -0.37827 | -0.80210 |
| C | 4.48333  | -1.03542 | -1.42400 |
| H | 4.51901  | -0.87035 | -2.50837 |
| H | 5.42453  | -0.65710 | -1.00452 |
| H | 4.45381  | -2.11385 | -1.25070 |

4s\_Senantiomer\_conformer-049

|   |          |          |          |
|---|----------|----------|----------|
| C | -3.38947 | 0.30571  | 0.28133  |
| N | -3.21777 | -1.87445 | -0.20854 |
| H | -3.48533 | -2.82583 | -0.42267 |
| C | -1.94061 | -1.41978 | -0.15835 |
| C | -1.99608 | -0.05976 | 0.14539  |
| C | 0.43625  | -1.25114 | -0.75117 |
| C | -0.69823 | -2.21567 | -0.37486 |
| H | 0.26168  | -0.86606 | -1.76485 |
| H | 1.39580  | -1.77426 | -0.76924 |
| H | -0.43147 | -2.75979 | 0.54399  |
| H | -0.84338 | -2.97254 | -1.15483 |
| C | -0.79123 | 0.72661  | 0.31301  |
| O | -0.79027 | 1.93914  | 0.55318  |
| C | 0.52989  | -0.06081 | 0.21967  |
| H | 0.68812  | -0.46598 | 1.23222  |
| C | 1.68769  | 0.88152  | -0.13039 |

|   |          |          |          |
|---|----------|----------|----------|
| H | 1.48636  | 1.32718  | -1.11225 |
| H | 1.71103  | 1.71230  | 0.59451  |
| C | 5.30920  | 0.31551  | -0.96044 |
| C | 3.98603  | 1.06182  | -0.84090 |
| N | 2.98044  | 0.20230  | -0.21490 |
| C | 3.46632  | -0.24504 | 1.09136  |
| C | 4.80451  | -0.95809 | 0.93392  |
| O | 5.77423  | -0.11858 | 0.31468  |
| H | 6.08512  | 0.96706  | -1.37183 |
| H | 5.18234  | -0.55209 | -1.62757 |
| H | 3.63673  | 1.35069  | -1.83880 |
| H | 4.14659  | 1.99029  | -0.25868 |
| H | 3.58461  | 0.60719  | 1.78901  |
| H | 2.74651  | -0.94020 | 1.53472  |
| H | 5.20937  | -1.23629 | 1.91087  |
| H | 4.66352  | -1.87201 | 0.33482  |
| C | -3.92535 | 1.67717  | 0.57480  |
| H | -4.96549 | 1.60222  | 0.91380  |
| H | -3.35340 | 2.12028  | 1.39755  |
| C | -3.84980 | 2.61787  | -0.63848 |
| H | -4.42220 | 2.21432  | -1.48153 |
| H | -2.80925 | 2.73952  | -0.95348 |
| H | -4.25268 | 3.60775  | -0.39344 |
| C | -4.11987 | -0.84057 | 0.05439  |
| C | -5.59127 | -1.09481 | 0.04133  |
| H | -6.13476 | -0.18985 | 0.32345  |
| H | -5.94430 | -1.39801 | -0.95288 |
| H | -5.87378 | -1.88851 | 0.74455  |

4s\_Senantiomer\_conformer-050

|   |          |          |          |
|---|----------|----------|----------|
| C | -3.24010 | 0.52903  | -0.25368 |
| N | -3.44200 | -1.65201 | 0.22040  |
| H | -3.86675 | -2.55470 | 0.38555  |
| C | -2.10637 | -1.41695 | 0.19049  |
| C | -1.92932 | -0.06359 | -0.09685 |
| C | 0.25969  | -1.88739 | -0.25460 |
| C | -1.01798 | -2.41060 | 0.41780  |
| H | 0.14216  | -1.94913 | -1.34507 |
| H | 1.11949  | -2.50651 | 0.01368  |
| H | -0.84250 | -2.54132 | 1.49649  |
| H | -1.29297 | -3.39624 | 0.02406  |
| C | -0.60762 | 0.52201  | -0.19109 |
| O | -0.40267 | 1.70939  | -0.46833 |
| C | 0.56256  | -0.42874 | 0.12730  |
| H | 0.67114  | -0.38648 | 1.22394  |

|   |          |          |          |
|---|----------|----------|----------|
| C | 1.86254  | 0.07523  | -0.51478 |
| H | 1.76692  | -0.01484 | -1.60329 |
| H | 1.96681  | 1.14702  | -0.30140 |
| C | 4.93929  | 0.60137  | -1.01184 |
| C | 4.13448  | -0.69854 | -1.06281 |
| N | 3.02347  | -0.72451 | -0.10434 |
| C | 3.53205  | -0.38644 | 1.23279  |
| C | 4.35310  | 0.90521  | 1.24777  |
| O | 5.42859  | 0.83573  | 0.30991  |
| H | 4.32050  | 1.45330  | -1.33776 |
| H | 5.81787  | 0.54616  | -1.66214 |
| H | 4.80919  | -1.53032 | -0.81868 |
| H | 3.74419  | -0.86823 | -2.07214 |
| H | 2.69714  | -0.31107 | 1.93689  |
| H | 4.17356  | -1.21147 | 1.56894  |
| H | 3.71651  | 1.77446  | 1.01777  |
| H | 4.80764  | 1.06636  | 2.23008  |
| C | -3.53714 | 1.97315  | -0.53836 |
| H | -2.88307 | 2.32502  | -1.34351 |
| H | -4.56828 | 2.07358  | -0.89778 |
| C | -3.33479 | 2.87649  | 0.68880  |
| H | -3.98154 | 2.56193  | 1.51582  |
| H | -2.29500 | 2.82633  | 1.02531  |
| H | -3.56773 | 3.92095  | 0.44994  |
| C | -4.15487 | -0.48095 | -0.04796 |
| C | -5.64799 | -0.48991 | -0.07000 |
| H | -6.02917 | 0.49425  | -0.35294 |
| H | -6.03984 | -1.22065 | -0.78902 |
| H | -6.06923 | -0.73991 | 0.91233  |

4s\_Senantiomer\_conformer-051

|   |          |          |          |
|---|----------|----------|----------|
| C | -2.55409 | 0.69800  | 0.20559  |
| N | -3.00451 | -1.12028 | -1.02463 |
| H | -3.49053 | -1.74977 | -1.64922 |
| C | -1.86338 | -1.41903 | -0.35503 |
| C | -1.53910 | -0.30900 | 0.42583  |
| C | -0.18878 | -2.78717 | 0.81867  |
| C | -1.10018 | -2.69929 | -0.41975 |
| H | 0.51454  | -3.61959 | 0.70747  |
| H | -0.80882 | -3.00141 | 1.69729  |
| H | -1.77612 | -3.56149 | -0.46008 |
| H | -0.49816 | -2.73562 | -1.33872 |
| C | -0.36652 | -0.30140 | 1.27480  |
| O | -0.11824 | 0.59509  | 2.09019  |
| C | 0.59841  | -1.48180 | 1.06689  |

|   |          |          |          |
|---|----------|----------|----------|
| H | 1.18637  | -1.59093 | 1.98356  |
| C | 1.58516  | -1.20178 | -0.09955 |
| H | 1.79155  | -2.14924 | -0.61040 |
| H | 1.08951  | -0.55742 | -0.84494 |
| C | 3.68305  | 0.45621  | -1.73093 |
| C | 3.88336  | -0.68974 | -0.73509 |
| N | 2.88804  | -0.69501 | 0.34664  |
| C | 2.86073  | 0.63971  | 0.96737  |
| C | 2.66854  | 1.76235  | -0.05173 |
| O | 3.68085  | 1.71741  | -1.06117 |
| H | 2.74059  | 0.32801  | -2.28729 |
| H | 4.50309  | 0.49102  | -2.45493 |
| H | 4.87469  | -0.57889 | -0.27597 |
| H | 3.85948  | -1.65372 | -1.25628 |
| H | 2.07557  | 0.67805  | 1.72463  |
| H | 3.82800  | 0.78786  | 1.46558  |
| H | 1.67323  | 1.69793  | -0.52087 |
| H | 2.75306  | 2.74279  | 0.42711  |
| C | -2.57917 | 2.07517  | 0.80264  |
| H | -3.57090 | 2.52086  | 0.66184  |
| H | -2.41027 | 2.00526  | 1.88264  |
| C | -1.51219 | 3.00206  | 0.19729  |
| H | -0.51220 | 2.59625  | 0.37806  |
| H | -1.56050 | 4.00173  | 0.64480  |
| H | -1.65213 | 3.10364  | -0.88486 |
| C | -3.44351 | 0.16675  | -0.70272 |
| C | -4.67819 | 0.72555  | -1.32956 |
| H | -4.56868 | 0.83955  | -2.41576 |
| H | -5.54948 | 0.08174  | -1.15459 |
| H | -4.90236 | 1.71077  | -0.91371 |

#### 4s\_Senantiomer\_conformer-052

|   |          |          |          |
|---|----------|----------|----------|
| C | -2.49792 | -0.65555 | 0.27174  |
| N | -2.82701 | 1.44398  | 0.98269  |
| H | -3.25195 | 2.23606  | 1.44589  |
| C | -1.72088 | 1.50421  | 0.20031  |
| C | -1.47467 | 0.21308  | -0.26879 |
| C | -0.07142 | 2.43315  | -1.36834 |
| C | -0.91455 | 2.71977  | -0.11224 |
| H | 0.66018  | 3.23434  | -1.51964 |
| H | -0.73347 | 2.42900  | -2.24242 |
| H | -1.55955 | 3.59154  | -0.27386 |
| H | -0.26228 | 2.97153  | 0.73598  |
| C | -0.33598 | -0.07823 | -1.11356 |
| O | -0.13579 | -1.18206 | -1.63554 |

|   |          |          |          |
|---|----------|----------|----------|
| C | 0.66431  | 1.07813  | -1.29020 |
| H | 1.19396  | 0.91073  | -2.23325 |
| C | 1.71830  | 1.08174  | -0.14877 |
| H | 1.95116  | 2.12219  | 0.10528  |
| H | 1.27120  | 0.64194  | 0.75860  |
| C | 3.90644  | -0.17534 | 1.70610  |
| C | 4.04920  | 0.70345  | 0.46013  |
| N | 2.99404  | 0.46843  | -0.53592 |
| C | 2.93135  | -0.97381 | -0.82488 |
| C | 2.79961  | -1.82508 | 0.43736  |
| O | 3.86706  | -1.55784 | 1.35129  |
| H | 2.99720  | 0.09140  | 2.26858  |
| H | 4.76639  | -0.05021 | 2.37147  |
| H | 5.01297  | 0.47584  | -0.01439 |
| H | 4.05411  | 1.76287  | 0.74146  |
| H | 2.10008  | -1.17805 | -1.50239 |
| H | 3.86676  | -1.24666 | -1.33120 |
| H | 1.83141  | -1.64117 | 0.93054  |
| H | 2.85934  | -2.89101 | 0.19671  |
| C | -2.64361 | -2.12695 | 0.01196  |
| H | -1.66079 | -2.60557 | 0.08630  |
| H | -3.27650 | -2.57761 | 0.78575  |
| C | -3.23529 | -2.43028 | -1.37378 |
| H | -4.22801 | -1.97853 | -1.48140 |
| H | -3.33172 | -3.51103 | -1.53149 |
| H | -2.58447 | -2.02595 | -2.15454 |
| C | -3.31919 | 0.13773  | 1.04269  |
| C | -4.53936 | -0.17802 | 1.84338  |
| H | -4.42260 | 0.11259  | 2.89516  |
| H | -5.42608 | 0.34102  | 1.45714  |
| H | -4.74465 | -1.25080 | 1.81374  |

#### 4s\_Senantiomer\_conformer-053

|   |          |          |          |
|---|----------|----------|----------|
| C | 3.25481  | -0.40967 | 0.18157  |
| N | 3.13935  | 1.66651  | -0.65391 |
| H | 3.42418  | 2.53660  | -1.08319 |
| C | 1.89908  | 1.41025  | -0.16906 |
| C | 1.91951  | 0.11901  | 0.35954  |
| C | -0.26816 | 1.88754  | 0.89545  |
| C | 0.72870  | 2.33306  | -0.18984 |
| H | -1.20082 | 2.44846  | 0.78288  |
| H | 0.14687  | 2.14877  | 1.87637  |
| H | 1.04031  | 3.36974  | -0.01597 |
| H | 0.24987  | 2.31779  | -1.17895 |
| C | 0.73881  | -0.46917 | 0.95094  |

|   |          |          |          |
|---|----------|----------|----------|
| O | 0.70065  | -1.59956 | 1.44946  |
| C | -0.54867 | 0.37051  | 0.87320  |
| H | -1.12705 | 0.09304  | 1.76075  |
| C | -1.36630 | -0.10245 | -0.35992 |
| H | -1.25596 | 0.62503  | -1.18655 |
| H | -0.96089 | -1.05198 | -0.72467 |
| C | -4.90062 | -1.27578 | -0.84731 |
| C | -3.44727 | -0.97733 | -1.19437 |
| N | -2.77630 | -0.34645 | -0.05545 |
| C | -3.50042 | 0.86589  | 0.32931  |
| C | -4.95590 | 0.52908  | 0.63490  |
| O | -5.59578 | -0.08837 | -0.47737 |
| H | -4.94029 | -2.00530 | -0.02283 |
| H | -5.42615 | -1.69094 | -1.71169 |
| H | -3.41716 | -0.33023 | -2.09271 |
| H | -2.92924 | -1.91169 | -1.43949 |
| H | -3.04603 | 1.29525  | 1.22690  |
| H | -3.46070 | 1.63175  | -0.47033 |
| H | -4.99965 | -0.13880 | 1.50996  |
| H | -5.52101 | 1.43842  | 0.85704  |
| C | 3.72654  | -1.78081 | 0.57054  |
| H | 4.82271  | -1.80352 | 0.58602  |
| H | 3.38856  | -2.00409 | 1.58839  |
| C | 3.20560  | -2.87774 | -0.37189 |
| H | 3.57345  | -3.86451 | -0.06678 |
| H | 2.11201  | -2.89922 | -0.35336 |
| H | 3.53140  | -2.69415 | -1.40209 |
| C | 3.98448  | 0.57200  | -0.45213 |
| C | 5.40623  | 0.61777  | -0.90633 |
| H | 5.94585  | 1.46718  | -0.46847 |
| H | 5.92774  | -0.29636 | -0.61261 |
| H | 5.48322  | 0.70890  | -1.99745 |

4s\_Senantiomer\_conformer-054

|   |          |          |          |
|---|----------|----------|----------|
| C | 3.36556  | -0.27081 | -0.22826 |
| N | 3.11806  | 1.89574  | 0.28966  |
| H | 3.34983  | 2.86064  | 0.48363  |
| C | 1.85872  | 1.39488  | 0.24096  |
| C | 1.96048  | 0.04132  | -0.07427 |
| C | -0.55246 | 1.39474  | -0.22683 |
| C | 0.58996  | 2.13381  | 0.48830  |
| H | -0.45211 | 1.53924  | -1.31058 |
| H | -1.50382 | 1.84177  | 0.06978  |
| H | 0.38132  | 2.17980  | 1.56782  |
| H | 0.65823  | 3.17064  | 0.13871  |

|   |          |          |          |
|---|----------|----------|----------|
| C | 0.78749  | -0.80029 | -0.18091 |
| O | 0.84223  | -2.01135 | -0.42604 |
| C | -0.57393 | -0.11429 | 0.07678  |
| H | -0.75083 | -0.23732 | 1.15791  |
| C | -1.68082 | -0.88689 | -0.67941 |
| H | -1.53875 | -0.74660 | -1.75824 |
| H | -1.51600 | -1.94933 | -0.47613 |
| C | -5.20488 | 0.46517  | -0.87858 |
| C | -3.69134 | 0.55281  | -1.05112 |
| N | -3.07613 | -0.58530 | -0.37841 |
| C | -3.43519 | -0.62831 | 1.03174  |
| C | -4.95579 | -0.66083 | 1.16443  |
| O | -5.55732 | 0.45025  | 0.50382  |
| H | -5.58132 | -0.44562 | -1.37070 |
| H | -5.69903 | 1.33771  | -1.31558 |
| H | -3.36135 | 1.52869  | -0.65383 |
| H | -3.43534 | 0.52211  | -2.11614 |
| H | -3.01006 | -1.53202 | 1.48451  |
| H | -3.04736 | 0.24221  | 1.59448  |
| H | -5.33905 | -1.60101 | 0.73702  |
| H | -5.25712 | -0.59878 | 2.21407  |
| C | 3.95250  | -1.61753 | -0.53886 |
| H | 3.38154  | -2.08317 | -1.34951 |
| H | 4.98046  | -1.49692 | -0.90127 |
| C | 3.94656  | -2.56323 | 0.67288  |
| H | 4.38691  | -3.53384 | 0.41537  |
| H | 4.52024  | -2.13665 | 1.50363  |
| H | 2.92002  | -2.73142 | 1.01132  |
| C | 4.05515  | 0.89933  | 0.00492  |
| C | 5.51538  | 1.21189  | -0.00524 |
| H | 6.08897  | 0.33398  | -0.31220 |
| H | 5.75205  | 2.02708  | -0.70087 |
| H | 5.87542  | 1.51386  | 0.98679  |

4s\_Senantiomer\_conformer-055

|   |          |          |          |
|---|----------|----------|----------|
| C | 2.41543  | 0.81798  | -0.41221 |
| N | 3.25973  | -0.77849 | 0.91590  |
| H | 3.88586  | -1.25632 | 1.54989  |
| C | 2.11467  | -1.30270 | 0.41098  |
| C | 1.55102  | -0.34089 | -0.42498 |
| C | 0.04362  | -2.60624 | 0.48545  |
| C | 1.57260  | -2.67376 | 0.63013  |
| H | -0.37572 | -3.61828 | 0.49684  |
| H | -0.35929 | -2.09407 | 1.36316  |
| H | 1.99383  | -3.37150 | -0.10878 |



|   |          |          |          |
|---|----------|----------|----------|
| H | 1.84783  | -3.05918 | 1.61845  |
| C | 0.36178  | -0.62865 | -1.19925 |
| O | -0.01591 | 0.05397  | -2.15518 |
| C | -0.42103 | -1.89882 | -0.80892 |
| H | -0.23195 | -2.60013 | -1.63580 |
| C | -1.94521 | -1.63245 | -0.82786 |
| H | -2.29097 | -1.65907 | -1.86540 |
| H | -2.44091 | -2.47346 | -0.30403 |
| C | -2.46662 | 1.31544  | 1.50392  |
| C | -1.98036 | -0.06913 | 1.08784  |
| N | -2.37825 | -0.34190 | -0.29096 |
| C | -3.82491 | -0.19159 | -0.43508 |
| C | -4.25777 | 1.19897  | 0.01201  |
| O | -3.87725 | 1.44652  | 1.36249  |
| H | -1.95728 | 2.07782  | 0.89295  |
| H | -2.23806 | 1.49900  | 2.55747  |
| H | -2.38030 | -0.82503 | 1.79261  |
| H | -0.88982 | -0.07956 | 1.16242  |
| H | -4.09530 | -0.33660 | -1.48754 |
| H | -4.37477 | -0.94891 | 0.15859  |
| H | -3.80437 | 1.95504  | -0.64863 |
| H | -5.34599 | 1.29809  | -0.03118 |
| C | 2.15941  | 2.11304  | -1.12666 |
| H | 3.05032  | 2.74943  | -1.07038 |
| H | 1.97640  | 1.91176  | -2.18808 |
| C | 0.94962  | 2.87346  | -0.55782 |
| H | 0.79822  | 3.82172  | -1.08674 |
| H | 0.04031  | 2.27450  | -0.66640 |
| H | 1.09200  | 3.09370  | 0.50632  |
| C | 3.45910  | 0.51947  | 0.43719  |
| C | 4.63849  | 1.31867  | 0.88463  |
| H | 4.61407  | 1.51318  | 1.96469  |
| H | 5.58369  | 0.80543  | 0.66629  |
| H | 4.65815  | 2.28438  | 0.37391  |

4s\_Senantiomer\_conformer-056

|   |          |          |          |
|---|----------|----------|----------|
| C | -2.45651 | -0.78269 | 0.11692  |
| N | -3.11257 | 1.20064  | 0.92915  |
| H | -3.66337 | 1.89503  | 1.41573  |
| C | -1.95787 | 1.45213  | 0.26296  |
| C | -1.51005 | 0.24207  | -0.26496 |
| C | 0.20570  | 2.53756  | -0.10677 |
| C | -1.30244 | 2.77576  | 0.06543  |
| H | 0.62120  | 2.25664  | 0.86450  |
| H | 0.69817  | 3.47136  | -0.39937 |

|   |          |          |          |
|---|----------|----------|----------|
| H | -1.71096 | 3.27171  | -0.82780 |
| H | -1.49257 | 3.44592  | 0.91150  |
| C | -0.32208 | 0.17606  | -1.09170 |
| O | -0.00564 | -0.81145 | -1.76059 |
| C | 0.53054  | 1.45990  | -1.16602 |
| H | 0.26443  | 1.89892  | -2.14072 |
| C | 2.04008  | 1.14212  | -1.25974 |
| H | 2.26760  | 0.83097  | -2.28384 |
| H | 2.58973  | 2.08824  | -1.08523 |
| C | 2.80068  | -0.96691 | 1.80054  |
| C | 2.25382  | 0.23047  | 1.02990  |
| N | 2.53841  | 0.07359  | -0.39322 |
| C | 3.97277  | -0.11449 | -0.60135 |
| C | 4.47445  | -1.30314 | 0.20890  |
| O | 4.20012  | -1.13210 | 1.59655  |
| H | 2.26651  | -1.87631 | 1.48183  |
| H | 2.65394  | -0.82945 | 2.87542  |
| H | 2.69042  | 1.16168  | 1.44273  |
| H | 1.17190  | 0.26670  | 1.18485  |
| H | 4.15769  | -0.29554 | -1.66676 |
| H | 4.54778  | 0.78789  | -0.31176 |
| H | 3.99606  | -2.22611 | -0.15571 |
| H | 5.55903  | -1.40582 | 0.11340  |
| C | -2.39075 | -2.23754 | -0.24897 |
| H | -1.35468 | -2.58386 | -0.16502 |
| H | -2.98132 | -2.82560 | 0.46399  |
| C | -2.88871 | -2.51461 | -1.67649 |
| H | -2.83040 | -3.58389 | -1.91247 |
| H | -2.27285 | -1.96861 | -2.39683 |
| H | -3.93004 | -2.19410 | -1.79564 |
| C | -3.43393 | -0.15703 | 0.86070  |
| C | -4.65598 | -0.68467 | 1.53735  |
| H | -4.65366 | -0.46512 | 2.61269  |
| H | -4.71612 | -1.76917 | 1.41764  |
| H | -5.57358 | -0.25262 | 1.11758  |

4s\_Senantiomer\_conformer-057

|   |          |          |          |
|---|----------|----------|----------|
| C | 2.62453  | 0.69067  | 0.18230  |
| N | 3.22913  | -1.43560 | 0.55266  |
| H | 3.78357  | -2.23124 | 0.83948  |
| C | 1.97542  | -1.50741 | 0.04115  |
| C | 1.55527  | -0.20120 | -0.21155 |
| C | -0.30518 | -2.37611 | -0.19927 |
| C | 1.18655  | -2.74257 | -0.23100 |
| H | -0.60061 | -2.16744 | 0.83336  |

|   |          |          |          |
|---|----------|----------|----------|
| H | -0.90840 | -3.22745 | -0.53331 |
| H | 1.45224  | -3.15112 | -1.21778 |
| H | 1.41006  | -3.52589 | 0.50276  |
| C | 0.26199  | 0.07527  | -0.79669 |
| O | -0.11363 | 1.20898  | -1.11952 |
| C | -0.62997 | -1.15468 | -1.07777 |
| H | -0.38487 | -1.41889 | -2.12002 |
| C | -2.12682 | -0.80550 | -1.08014 |
| H | -2.24491 | 0.15079  | -1.60932 |
| H | -2.65207 | -1.56635 | -1.66839 |
| C | -4.68932 | 0.70705  | -0.07645 |
| C | -4.20581 | -0.71994 | 0.19764  |
| N | -2.74245 | -0.82684 | 0.25356  |
| C | -2.23506 | 0.17052  | 1.20673  |
| C | -2.73807 | 1.58399  | 0.91541  |
| O | -4.16933 | 1.61344  | 0.89665  |
| H | -5.77991 | 0.76982  | -0.00717 |
| H | -4.38973 | 1.03070  | -1.08613 |
| H | -4.59006 | -1.40536 | -0.56632 |
| H | -4.60557 | -1.03918 | 1.16969  |
| H | -2.58653 | -0.12422 | 2.20472  |
| H | -1.14268 | 0.14875  | 1.22823  |
| H | -2.42702 | 2.27888  | 1.70190  |
| H | -2.33718 | 1.94112  | -0.04359 |
| C | 2.62381  | 2.18786  | 0.06799  |
| H | 1.65422  | 2.57416  | 0.40087  |
| H | 3.38233  | 2.60954  | 0.73839  |
| C | 2.88218  | 2.67646  | -1.36629 |
| H | 2.87975  | 3.77189  | -1.41401 |
| H | 3.85233  | 2.32012  | -1.73101 |
| H | 2.10210  | 2.30209  | -2.03558 |
| C | 3.64629  | -0.10544 | 0.65182  |
| C | 4.99536  | 0.22935  | 1.19731  |
| H | 5.80072  | -0.17025 | 0.56759  |
| H | 5.12369  | 1.31314  | 1.25074  |
| H | 5.13844  | -0.17580 | 2.20716  |

4s\_Senantiomer\_conformer-058

|   |          |          |          |
|---|----------|----------|----------|
| C | 3.28714  | 0.41631  | -0.22959 |
| N | 3.27287  | -1.80908 | 0.03358  |
| H | 3.60797  | -2.75652 | 0.14473  |
| C | 1.96768  | -1.44078 | 0.04987  |
| C | 1.92434  | -0.05646 | -0.11153 |
| C | -0.40168 | -1.49425 | 0.68206  |
| C | 0.78836  | -2.33931 | 0.20467  |

|   |          |          |          |
|---|----------|----------|----------|
| H | -0.23505 | -1.19231 | 1.72411  |
| H | -1.31318 | -2.10038 | 0.67092  |
| H | 0.54189  | -2.81335 | -0.75757 |
| H | 0.99825  | -3.15242 | 0.90963  |
| C | 0.66740  | 0.66017  | -0.17695 |
| O | 0.58788  | 1.88803  | -0.28124 |
| C | -0.60186 | -0.22705 | -0.17393 |
| H | -0.72014 | -0.53382 | -1.22538 |
| C | -1.85533 | 0.57505  | 0.21535  |
| H | -2.15734 | 0.29067  | 1.23792  |
| H | -1.58485 | 1.63353  | 0.24643  |
| C | -4.94107 | 1.05033  | 0.60559  |
| C | -4.01737 | 1.42343  | -0.55654 |
| N | -2.93782 | 0.45027  | -0.77112 |
| C | -3.52704 | -0.89223 | -0.87720 |
| C | -4.45347 | -1.23379 | 0.29141  |
| O | -5.48810 | -0.25620 | 0.41663  |
| H | -5.79195 | 1.73601  | 0.66463  |
| H | -4.39903 | 1.09230  | 1.56384  |
| H | -3.58062 | 2.41488  | -0.39250 |
| H | -4.61912 | 1.46638  | -1.47442 |
| H | -4.11599 | -0.92465 | -1.80328 |
| H | -2.73358 | -1.63947 | -0.97038 |
| H | -4.95228 | -2.19371 | 0.12641  |
| H | -3.88747 | -1.29959 | 1.23453  |
| C | 3.72565  | 1.84354  | -0.38788 |
| H | 4.75854  | 1.87297  | -0.75485 |
| H | 3.10438  | 2.33081  | -1.14729 |
| C | 3.62522  | 2.64645  | 0.91900  |
| H | 4.24549  | 2.19607  | 1.70234  |
| H | 3.95803  | 3.68058  | 0.77072  |
| H | 2.58853  | 2.66667  | 1.26782  |
| C | 4.09752  | -0.69424 | -0.13442 |
| C | 5.58248  | -0.84767 | -0.17199 |
| H | 5.90025  | -1.54152 | -0.96063 |
| H | 6.05859  | 0.11687  | -0.36396 |
| H | 5.97724  | -1.22987 | 0.77830  |

#### 4s\_Senantiomer\_conformer-059

|   |          |          |          |
|---|----------|----------|----------|
| C | -3.39087 | 0.34382  | -0.19553 |
| N | -3.21763 | -1.87964 | 0.02439  |
| H | -3.48260 | -2.85365 | 0.08325  |
| C | -1.94105 | -1.42121 | 0.03177  |
| C | -1.99741 | -0.03371 | -0.09759 |
| C | 0.46757  | -1.43365 | -0.44235 |

|   |          |          |          |
|---|----------|----------|----------|
| C | -0.69872 | -2.23661 | 0.15243  |
| H | 1.41918  | -1.93110 | -0.23865 |
| H | 0.35595  | -1.38963 | -1.53410 |
| H | -0.49250 | -2.45942 | 1.21040  |
| H | -0.80783 | -3.20254 | -0.35472 |
| C | -0.79406 | 0.77239  | -0.11714 |
| O | -0.79211 | 1.99978  | -0.26371 |
| C | 0.52254  | 0.00285  | 0.10640  |
| H | 0.62671  | -0.06046 | 1.20174  |
| C | 1.70530  | 0.79430  | -0.46546 |
| H | 1.55317  | 0.91112  | -1.54544 |
| H | 1.70507  | 1.80975  | -0.03513 |
| C | 4.74927  | -0.61727 | 1.25873  |
| C | 3.41467  | 0.10747  | 1.12622  |
| N | 2.99315  | 0.12723  | -0.27527 |
| C | 4.03583  | 0.75227  | -1.08989 |
| C | 5.35333  | 0.00760  | -0.91168 |
| O | 5.75601  | -0.00953 | 0.45514  |
| H | 4.62276  | -1.67194 | 0.96593  |
| H | 5.10724  | -0.57878 | 2.29127  |
| H | 3.51262  | 1.13399  | 1.53078  |
| H | 2.66726  | -0.41764 | 1.72926  |
| H | 3.73448  | 0.71715  | -2.14308 |
| H | 4.18255  | 1.81570  | -0.81704 |
| H | 5.24483  | -1.02414 | -1.28263 |
| H | 6.15503  | 0.50073  | -1.46837 |
| C | -3.92890 | 1.74073  | -0.31207 |
| H | -3.35466 | 2.28777  | -1.06761 |
| H | -4.96768 | 1.70836  | -0.66183 |
| C | -3.86075 | 2.51582  | 1.01361  |
| H | -4.26426 | 3.52869  | 0.89767  |
| H | -4.43622 | 2.00505  | 1.79407  |
| H | -2.82228 | 2.59731  | 1.34812  |
| C | -4.12038 | -0.82245 | -0.11334 |
| C | -5.59096 | -1.08003 | -0.14630 |
| H | -5.95217 | -1.50570 | 0.79881  |
| H | -6.13540 | -0.14859 | -0.31933 |
| H | -5.86347 | -1.78103 | -0.94558 |

4s\_Senantiomer\_conformer-060

|   |          |          |          |
|---|----------|----------|----------|
| C | -3.28969 | 0.41605  | -0.23477 |
| N | -3.27967 | -1.80355 | 0.07383  |
| H | -3.61558 | -2.75211 | 0.17235  |
| C | -1.97278 | -1.44145 | 0.05334  |
| C | -1.92702 | -0.06004 | -0.13089 |

|   |          |          |          |
|---|----------|----------|----------|
| C | 0.42361  | -1.64139 | -0.42871 |
| C | -0.79415 | -2.34379 | 0.18962  |
| H | 0.30825  | -1.61222 | -1.51989 |
| H | 1.32893  | -2.22109 | -0.22216 |
| H | -0.59710 | -2.55573 | 1.25150  |
| H | -0.97604 | -3.31046 | -0.29453 |
| C | -0.66887 | 0.65498  | -0.19167 |
| O | -0.58482 | 1.86890  | -0.40169 |
| C | 0.59200  | -0.19906 | 0.09059  |
| H | 0.65458  | -0.23284 | 1.18999  |
| C | 1.87022  | 0.48634  | -0.42127 |
| H | 2.22226  | -0.04248 | -1.32355 |
| H | 1.61029  | 1.50218  | -0.72926 |
| C | 4.46416  | -1.25908 | 0.07957  |
| C | 3.47777  | -0.65404 | 1.08032  |
| N | 2.89880  | 0.61641  | 0.62056  |
| C | 3.99067  | 1.51983  | 0.23371  |
| C | 4.97406  | 0.88597  | -0.75335 |
| O | 5.50653  | -0.33032 | -0.22505 |
| H | 3.94888  | -1.55755 | -0.84752 |
| H | 4.95111  | -2.14508 | 0.49834  |
| H | 4.01644  | -0.45488 | 2.01613  |
| H | 2.67839  | -1.36450 | 1.31031  |
| H | 3.56603  | 2.43756  | -0.18829 |
| H | 4.54265  | 1.78983  | 1.14415  |
| H | 4.48375  | 0.68923  | -1.72018 |
| H | 5.82887  | 1.54550  | -0.93218 |
| C | -3.72517 | 1.84274  | -0.40609 |
| H | -3.12227 | 2.31311  | -1.19030 |
| H | -4.76775 | 1.87151  | -0.74460 |
| C | -3.58523 | 2.66750  | 0.88355  |
| H | -2.53957 | 2.68998  | 1.20474  |
| H | -3.91778 | 3.70043  | 0.72671  |
| H | -4.18545 | 2.23331  | 1.69125  |
| C | -4.10276 | -0.68841 | -0.09978 |
| C | -5.58866 | -0.83680 | -0.11052 |
| H | -6.06421 | 0.12259  | -0.32808 |
| H | -5.91992 | -1.55532 | -0.87106 |
| H | -5.97130 | -1.18561 | 0.85737  |

4s\_Senantiomer\_conformer-061

|   |         |          |          |
|---|---------|----------|----------|
| C | 3.10926 | 0.44979  | -0.06511 |
| N | 2.92201 | -1.70570 | 0.51784  |
| H | 3.16648 | -2.61966 | 0.87469  |
| C | 1.73715 | -1.39181 | -0.06306 |

|   |          |          |          |
|---|----------|----------|----------|
| C | 1.80384  | -0.04920 | -0.43982 |
| C | -0.30628 | -1.74069 | -1.38998 |
| C | 0.57510  | -2.30540 | -0.26244 |
| H | -1.25643 | -2.27999 | -1.42345 |
| H | 0.20343  | -1.89756 | -2.34820 |
| H | 0.90941  | -3.32055 | -0.50666 |
| H | -0.00775 | -2.38750 | 0.66639  |
| C | 0.68270  | 0.60764  | -1.07764 |
| O | 0.68082  | 1.78975  | -1.44075 |
| C | -0.59021 | -0.23882 | -1.22170 |
| H | -1.09710 | 0.13354  | -2.11874 |
| C | -1.48193 | 0.06691  | 0.00628  |
| H | -0.94065 | -0.21381 | 0.91626  |
| H | -1.62441 | 1.15820  | 0.05494  |
| C | -4.07251 | 0.40099  | 1.79350  |
| C | -3.35009 | -0.85799 | 1.31077  |
| N | -2.73278 | -0.69222 | -0.01070 |
| C | -3.73504 | -0.17746 | -0.95469 |
| C | -4.45455 | 1.06790  | -0.43198 |
| O | -5.05317 | 0.81269  | 0.83988  |
| H | -3.35326 | 1.21811  | 1.96649  |
| H | -4.60917 | 0.21214  | 2.72838  |
| H | -4.08456 | -1.67144 | 1.23892  |
| H | -2.58303 | -1.16093 | 2.03180  |
| H | -3.26014 | 0.03427  | -1.91760 |
| H | -4.47920 | -0.96733 | -1.11957 |
| H | -3.75622 | 1.91610  | -0.34976 |
| H | -5.26676 | 1.35956  | -1.10470 |
| C | 3.60853  | 1.85433  | -0.24443 |
| H | 4.70051  | 1.87357  | -0.14652 |
| H | 3.37390  | 2.19580  | -1.25866 |
| C | 2.98802  | 2.83694  | 0.76183  |
| H | 3.37494  | 3.85151  | 0.60979  |
| H | 3.21326  | 2.53497  | 1.79102  |
| H | 1.90125  | 2.86274  | 0.63920  |
| C | 3.77613  | -0.60002 | 0.52787  |
| C | 5.14373  | -0.70358 | 1.11851  |
| H | 5.68652  | 0.23535  | 0.98540  |
| H | 5.10846  | -0.91787 | 2.19448  |
| H | 5.73169  | -1.50058 | 0.64565  |

4s\_Senantiomer\_conformer-062

|   |          |          |          |
|---|----------|----------|----------|
| C | -3.24854 | 0.20088  | 0.05752  |
| N | -2.64846 | -1.95741 | 0.00370  |
| H | -2.71705 | -2.96200 | -0.08890 |

|   |          |          |          |
|---|----------|----------|----------|
| C | -1.52636 | -1.28622 | 0.36564  |
| C | -1.85089 | 0.07106  | 0.40740  |
| C | 0.60116  | -0.87274 | 1.51650  |
| C | -0.19272 | -1.88158 | 0.66990  |
| H | 1.63311  | -1.21016 | 1.63957  |
| H | 0.15912  | -0.84087 | 2.52019  |
| H | -0.29763 | -2.83272 | 1.20483  |
| H | 0.34568  | -2.10923 | -0.26108 |
| C | -0.86047 | 1.07270  | 0.74444  |
| O | -1.09099 | 2.28641  | 0.80681  |
| C | 0.56985  | 0.55164  | 0.93426  |
| H | 1.05227  | 1.23450  | 1.64193  |
| C | 1.27860  | 0.72735  | -0.44462 |
| H | 0.75496  | 0.13635  | -1.20467 |
| H | 1.14758  | 1.78247  | -0.71848 |
| C | 4.53366  | -1.03238 | -1.19967 |
| C | 3.06338  | -0.97637 | -0.79486 |
| N | 2.69609  | 0.41297  | -0.54359 |
| C | 3.54662  | 1.02276  | 0.47015  |
| C | 5.00707  | 0.89739  | 0.04480  |
| O | 5.36214  | -0.46364 | -0.18790 |
| H | 4.67623  | -0.49090 | -2.14821 |
| H | 4.86275  | -2.06761 | -1.32665 |
| H | 2.92423  | -1.63196 | 0.08236  |
| H | 2.44312  | -1.36878 | -1.60846 |
| H | 3.28429  | 2.08270  | 0.56881  |
| H | 3.42328  | 0.55350  | 1.46377  |
| H | 5.17367  | 1.48799  | -0.86994 |
| H | 5.67384  | 1.26327  | 0.83068  |
| C | -4.01691 | 1.48485  | -0.06522 |
| H | -5.09302 | 1.27458  | -0.05101 |
| H | -3.80419 | 2.11837  | 0.80278  |
| C | -3.66526 | 2.26599  | -1.34163 |
| H | -4.24519 | 3.19427  | -1.40621 |
| H | -2.60249 | 2.52535  | -1.34125 |
| H | -3.87556 | 1.66771  | -2.23548 |
| C | -3.71228 | -1.07285 | -0.18978 |
| C | -5.05607 | -1.57976 | -0.59872 |
| H | -5.03099 | -2.04838 | -1.59100 |
| H | -5.44040 | -2.32777 | 0.10637  |
| H | -5.77515 | -0.75804 | -0.63857 |

4s\_Senantiomer\_conformer-063

|   |         |          |          |
|---|---------|----------|----------|
| C | 2.72054 | -0.48971 | -0.35007 |
| N | 2.86572 | 1.72074  | -0.69119 |



|   |          |          |          |
|---|----------|----------|----------|
| H | 3.21443  | 2.61289  | -1.01513 |
| C | 1.71070  | 1.54192  | -0.00353 |
| C | 1.57749  | 0.17478  | 0.23778  |
| C | -0.62804 | 1.94379  | 0.59074  |
| C | 0.75370  | 2.59739  | 0.43472  |
| H | -0.99450 | 1.67767  | -0.40580 |
| H | -1.33795 | 2.66146  | 1.01574  |
| H | 1.07454  | 3.03030  | 1.39433  |
| H | 0.71473  | 3.42258  | -0.28583 |
| C | 0.46191  | -0.35279 | 0.99505  |
| O | 0.35681  | -1.54359 | 1.31323  |
| C | -0.58058 | 0.68249  | 1.47134  |
| H | -0.20650 | 0.99069  | 2.46329  |
| C | -1.96378 | 0.04172  | 1.74576  |
| H | -1.77248 | -0.89240 | 2.28456  |
| H | -2.51924 | 0.70258  | 2.42027  |
| C | -3.41524 | -1.58915 | -1.33390 |
| C | -2.28846 | -1.07283 | -0.44423 |
| N | -2.85107 | -0.26176 | 0.62766  |
| C | -3.67230 | 0.82580  | 0.10611  |
| C | -4.77103 | 0.23813  | -0.77402 |
| O | -4.21228 | -0.52209 | -1.84367 |
| H | -4.04809 | -2.28128 | -0.75547 |
| H | -3.01268 | -2.11879 | -2.20226 |
| H | -1.57017 | -0.50751 | -1.06898 |
| H | -1.74490 | -1.91516 | -0.00813 |
| H | -4.12181 | 1.36962  | 0.94481  |
| H | -3.10383 | 1.55275  | -0.49882 |
| H | -5.43053 | -0.40126 | -0.16566 |
| H | -5.36795 | 1.03106  | -1.23406 |
| C | 3.01231  | -1.96223 | -0.31491 |
| H | 2.09181  | -2.51740 | -0.52588 |
| H | 3.72622  | -2.21583 | -1.10780 |
| C | 3.56833  | -2.42772 | 1.04034  |
| H | 3.77686  | -3.50416 | 1.03030  |
| H | 4.49862  | -1.90101 | 1.28200  |
| H | 2.84063  | -2.22627 | 1.83180  |
| C | 3.49835  | 0.49591  | -0.91821 |
| C | 4.78870  | 0.43517  | -1.66727 |
| H | 5.10200  | -0.60335 | -1.79881 |
| H | 4.70281  | 0.88852  | -2.66303 |
| H | 5.59355  | 0.96068  | -1.13722 |

4s\_Senantiomer\_conformer-064

|   |          |         |          |
|---|----------|---------|----------|
| C | -2.87549 | 0.73266 | -0.28395 |
|---|----------|---------|----------|

|   |          |          |          |
|---|----------|----------|----------|
| N | -3.64491 | -1.32210 | 0.17358  |
| H | -4.29256 | -2.08236 | 0.33221  |
| C | -2.29452 | -1.44511 | 0.15022  |
| C | -1.76700 | -0.18439 | -0.12649 |
| C | -0.12083 | -2.51409 | -0.26306 |
| C | -1.50646 | -2.68966 | 0.37712  |
| H | -0.21853 | -2.55728 | -1.35582 |
| H | 0.53126  | -3.34154 | 0.03599  |
| H | -1.39183 | -2.87342 | 1.45616  |
| H | -2.01918 | -3.56572 | -0.03705 |
| C | -0.33897 | 0.03314  | -0.22021 |
| O | 0.16405  | 1.12250  | -0.52057 |
| C | 0.54628  | -1.17958 | 0.13036  |
| H | 0.63485  | -1.17386 | 1.22821  |
| C | 1.97089  | -1.06332 | -0.44654 |
| H | 2.26514  | -2.03690 | -0.85370 |
| H | 1.95961  | -0.35743 | -1.28932 |
| C | 4.86007  | 0.14288  | -0.80387 |
| C | 4.34902  | -0.95363 | 0.13381  |
| N | 2.96818  | -0.73419 | 0.58307  |
| C | 2.85725  | 0.62678  | 1.13157  |
| C | 3.39563  | 1.69866  | 0.18402  |
| O | 4.75105  | 1.42450  | -0.18496 |
| H | 4.29775  | 0.13598  | -1.75170 |
| H | 5.92030  | -0.00236 | -1.03449 |
| H | 4.99278  | -0.97088 | 1.02377  |
| H | 4.41994  | -1.93379 | -0.35162 |
| H | 1.81442  | 0.84167  | 1.37434  |
| H | 3.43866  | 0.65626  | 2.06297  |
| H | 2.76359  | 1.76047  | -0.71299 |
| H | 3.40186  | 2.67949  | 0.67021  |
| C | -2.78033 | 2.20594  | -0.55726 |
| H | -2.07047 | 2.37759  | -1.37377 |
| H | -3.75312 | 2.58139  | -0.89638 |
| C | -2.32248 | 3.01071  | 0.66980  |
| H | -2.27171 | 4.08152  | 0.43972  |
| H | -1.32825 | 2.68161  | 0.98616  |
| H | -3.01558 | 2.87287  | 1.50748  |
| C | -4.02410 | -0.00295 | -0.08786 |
| C | -5.46725 | 0.38005  | -0.11293 |
| H | -5.57620 | 1.43109  | -0.39085 |
| H | -5.94265 | 0.24388  | 0.86700  |
| H | -6.03412 | -0.21869 | -0.83723 |

4s\_Senantiomer\_conformer-065

|   |          |          |          |
|---|----------|----------|----------|
| C | 2.67541  | 0.69077  | -0.21800 |
| N | 3.11199  | -1.22160 | 0.86390  |
| H | 3.60331  | -1.91108 | 1.41657  |
| C | 1.92461  | -1.42996 | 0.23768  |
| C | 1.60933  | -0.25737 | -0.44828 |
| C | 0.08822  | -2.65528 | -0.87890 |
| C | 1.11923  | -2.68666 | 0.26736  |
| H | -0.66386 | -3.43652 | -0.72100 |
| H | 0.59979  | -2.88938 | -1.81974 |
| H | 1.76339  | -3.56877 | 0.16976  |
| H | 0.61198  | -2.78751 | 1.23696  |
| C | 0.40577  | -0.15646 | -1.24922 |
| O | 0.17530  | 0.75864  | -2.04540 |
| C | -0.60804 | -1.28582 | -1.03198 |
| H | -1.23925 | -1.31730 | -1.92578 |
| C | -1.48684 | -0.98298 | 0.20134  |
| H | -2.28965 | -1.74049 | 0.22849  |
| H | -0.89061 | -1.13162 | 1.10750  |
| C | -4.27953 | 0.22196  | -0.66503 |
| C | -2.87123 | 0.79117  | -0.83377 |
| N | -1.96678 | 0.39895  | 0.25675  |
| C | -2.59395 | 0.73455  | 1.54113  |
| C | -4.01262 | 0.17485  | 1.67719  |
| O | -4.83493 | 0.61133  | 0.59388  |
| H | -4.27052 | -0.87732 | -0.74328 |
| H | -4.95404 | 0.61188  | -1.43353 |
| H | -2.93890 | 1.88692  | -0.82459 |
| H | -2.43635 | 0.50167  | -1.79252 |
| H | -1.96080 | 0.37210  | 2.35893  |
| H | -2.64540 | 1.82902  | 1.61369  |
| H | -3.99508 | -0.92642 | 1.71153  |
| H | -4.48928 | 0.53687  | 2.59341  |
| C | 2.71496  | 2.10601  | -0.71702 |
| H | 3.72881  | 2.51018  | -0.61169 |
| H | 2.47300  | 2.11925  | -1.78501 |
| C | 1.72113  | 3.01624  | 0.02388  |
| H | 1.95082  | 3.05219  | 1.09496  |
| H | 1.75614  | 4.03934  | -0.36869 |
| H | 0.70079  | 2.63890  | -0.09348 |
| C | 3.58714  | 0.06586  | 0.60511  |
| C | 4.87301  | 0.53557  | 1.20166  |
| H | 4.82170  | 0.58525  | 2.29704  |
| H | 5.70751  | -0.12875 | 0.94345  |
| H | 5.11739  | 1.53576  | 0.83564  |

4s\_Senantiomer\_conformer-066

|   |          |          |          |
|---|----------|----------|----------|
| C | 2.40339  | -0.85181 | 0.38957  |
| N | 3.29006  | 0.84202  | -0.77885 |
| H | 3.95462  | 1.37979  | -1.31882 |
| C | 2.10098  | 1.31000  | -0.32232 |
| C | 1.50388  | 0.28089  | 0.40762  |
| C | 0.46322  | 2.94266  | 0.52960  |
| C | 1.54923  | 2.68060  | -0.53186 |
| H | -0.09507 | 3.85027  | 0.27320  |
| H | 0.95267  | 3.12848  | 1.49294  |
| H | 2.33993  | 3.43677  | -0.46002 |
| H | 1.12906  | 2.77261  | -1.54300 |
| C | 0.21853  | 0.46502  | 1.04937  |
| O | -0.29240 | -0.35608 | 1.82120  |
| C | -0.51651 | 1.76070  | 0.69157  |
| H | -1.18570 | 1.97445  | 1.53153  |
| C | -1.38659 | 1.61906  | -0.59394 |
| H | -1.85528 | 2.60125  | -0.75063 |
| H | -0.73543 | 1.43553  | -1.45538 |
| C | -4.55325 | -0.25821 | 0.19457  |
| C | -3.34817 | 0.62286  | 0.50944  |
| N | -2.43876 | 0.61548  | -0.63332 |
| C | -2.02597 | -0.74689 | -0.96818 |
| C | -3.26986 | -1.58031 | -1.25670 |
| O | -4.15151 | -1.58625 | -0.13525 |
| H | -5.11939 | 0.17837  | -0.64391 |
| H | -5.21300 | -0.34021 | 1.06324  |
| H | -2.85916 | 0.25650  | 1.42735  |
| H | -3.68559 | 1.65065  | 0.69214  |
| H | -1.38621 | -0.71818 | -1.85794 |
| H | -1.46188 | -1.22917 | -0.15681 |
| H | -3.79131 | -1.17587 | -2.13912 |
| H | -3.00301 | -2.62386 | -1.44777 |
| C | 2.16087  | -2.19361 | 1.01897  |
| H | 3.11723  | -2.70895 | 1.16942  |
| H | 1.71376  | -2.05031 | 2.00759  |
| C | 1.23226  | -3.08691 | 0.18060  |
| H | 1.07577  | -4.05718 | 0.66644  |
| H | 0.25576  | -2.61011 | 0.05092  |
| H | 1.65674  | -3.26584 | -0.81384 |
| C | 3.49642  | -0.47402 | -0.35970 |
| C | 4.73659  | -1.21010 | -0.74651 |
| H | 5.64188  | -0.66230 | -0.45544 |
| H | 4.76486  | -2.18684 | -0.25734 |
| H | 4.79075  | -1.37916 | -1.82977 |

## 4s\_Senantiomer\_conformer-067

|   |          |          |          |
|---|----------|----------|----------|
| C | 3.15229  | 0.25350  | -0.04125 |
| N | 2.70923  | -1.86492 | 0.54003  |
| H | 2.84399  | -2.80222 | 0.89477  |
| C | 1.57123  | -1.41186 | -0.04238 |
| C | 1.79733  | -0.08705 | -0.41792 |
| C | -0.50070 | -1.50266 | -1.36870 |
| C | 0.31353  | -2.18379 | -0.25365 |
| H | -1.49526 | -1.95628 | -1.41756 |
| H | -0.01149 | -1.70476 | -2.32910 |
| H | 0.52980  | -3.22383 | -0.52506 |
| H | -0.26989 | -2.22523 | 0.67690  |
| C | 0.76814  | 0.69794  | -1.06246 |
| O | 0.92104  | 1.86257  | -1.44677 |
| C | -0.61045 | 0.02680  | -1.19156 |
| H | -1.06749 | 0.46784  | -2.08345 |
| C | -1.47414 | 0.46269  | 0.02420  |
| H | -1.48085 | -0.34762 | 0.77134  |
| H | -1.00284 | 1.32149  | 0.51367  |
| C | -4.21699 | -1.11906 | 0.02493  |
| C | -3.67019 | -0.10777 | -0.98408 |
| N | -2.81553 | 0.91547  | -0.36542 |
| C | -3.54877 | 1.52638  | 0.75280  |
| C | -4.10626 | 0.49629  | 1.73873  |
| O | -4.93499 | -0.45294 | 1.06522  |
| H | -3.40205 | -1.71988 | 0.46027  |
| H | -4.92575 | -1.80271 | -0.45214 |
| H | -4.52084 | 0.41011  | -1.44583 |
| H | -3.12578 | -0.61372 | -1.78545 |
| H | -2.89199 | 2.23356  | 1.27181  |
| H | -4.38996 | 2.09282  | 0.33189  |
| H | -3.28923 | -0.02689 | 2.26073  |
| H | -4.73734 | 0.97861  | 2.49139  |
| C | 3.81543  | 1.58821  | -0.22234 |
| H | 4.90072  | 1.47921  | -0.11021 |
| H | 3.63461  | 1.94609  | -1.24188 |
| C | 3.30297  | 2.64638  | 0.76799  |
| H | 3.81208  | 3.60537  | 0.61545  |
| H | 3.47475  | 2.32818  | 1.80259  |
| H | 2.22934  | 2.80285  | 0.62761  |
| C | 3.68801  | -0.86775 | 0.55344  |
| C | 5.03073  | -1.13138 | 1.15113  |
| H | 5.52060  | -1.99551 | 0.68458  |
| H | 5.68255  | -0.26486 | 1.01662  |
| H | 4.96514  | -1.33476 | 2.22777  |

## 4s\_Senantiomer\_conformer-068

|   |          |          |          |
|---|----------|----------|----------|
| C | 3.08203  | 0.19359  | 0.40950  |
| N | 2.62205  | -1.98468 | 0.15432  |
| H | 2.73718  | -2.98920 | 0.16477  |
| C | 1.52277  | -1.33464 | -0.30196 |
| C | 1.76235  | 0.03295  | -0.16249 |
| C | -0.46810 | -0.90920 | -1.68440 |
| C | 0.28403  | -1.95943 | -0.84715 |
| H | -1.45457 | -1.29992 | -1.95224 |
| H | 0.07880  | -0.75614 | -2.62249 |
| H | 0.52220  | -2.83482 | -1.46287 |
| H | -0.35145 | -2.32479 | -0.02814 |
| C | 0.76070  | 1.01205  | -0.52161 |
| O | 0.92005  | 2.23437  | -0.43156 |
| C | -0.60108 | 0.45298  | -0.97071 |
| H | -1.00234 | 1.19457  | -1.66923 |
| C | -1.54892 | 0.43191  | 0.25995  |
| H | -1.60829 | -0.59601 | 0.65336  |
| H | -1.11546 | 1.03845  | 1.06197  |
| C | -4.28082 | -0.97621 | -0.49146 |
| C | -3.66811 | 0.31896  | -1.02709 |
| N | -2.86016 | 1.02870  | -0.02504 |
| C | -3.67022 | 1.21019  | 1.18829  |
| C | -4.29164 | -0.09394 | 1.69507  |
| O | -5.06997 | -0.71579 | 0.67088  |
| H | -3.49621 | -1.71236 | -0.25229 |
| H | -4.95371 | -1.42418 | -1.22888 |
| H | -4.48588 | 0.98835  | -1.32390 |
| H | -3.06843 | 0.12486  | -1.92012 |
| H | -3.05248 | 1.66663  | 1.96985  |
| H | -4.48176 | 1.90952  | 0.94748  |
| H | -3.51107 | -0.78899 | 2.04325  |
| H | -4.97401 | 0.09720  | 2.52889  |
| C | 3.76926  | 1.49490  | 0.70597  |
| H | 3.07126  | 2.16201  | 1.22381  |
| H | 4.60990  | 1.32131  | 1.38825  |
| C | 4.27615  | 2.20224  | -0.56106 |
| H | 4.77780  | 3.14436  | -0.31028 |
| H | 3.43654  | 2.42713  | -1.22528 |
| H | 4.98757  | 1.56912  | -1.10346 |
| C | 3.58772  | -1.07473 | 0.59247  |
| C | 4.89504  | -1.55651 | 1.12978  |
| H | 5.49822  | -0.71261 | 1.47308  |
| H | 4.75943  | -2.23936 | 1.97808  |

|   |         |          |         |
|---|---------|----------|---------|
| H | 5.47598 | -2.09260 | 0.36818 |
|---|---------|----------|---------|

4s\_Senantiomer\_conformer-069

|   |          |          |          |
|---|----------|----------|----------|
| C | -3.37957 | 0.28628  | 0.26491  |
| N | -3.16306 | -1.90057 | -0.17445 |
| H | -3.41097 | -2.86176 | -0.36714 |
| C | -1.89524 | -1.42007 | -0.12842 |
| C | -1.97862 | -0.05486 | 0.14413  |
| C | 0.47951  | -1.21706 | -0.71666 |
| C | -0.63648 | -2.19588 | -0.32261 |
| H | 0.29944  | -0.85621 | -1.73818 |
| H | 1.44903  | -1.72192 | -0.72289 |
| H | -0.36196 | -2.71337 | 0.60924  |
| H | -0.76368 | -2.97303 | -1.08559 |
| C | -0.78958 | 0.75813  | 0.29917  |
| O | -0.81293 | 1.97594  | 0.50995  |
| C | 0.54596  | -0.00621 | 0.23080  |
| H | 0.70914  | -0.38846 | 1.25162  |
| C | 1.69253  | 0.94710  | -0.12746 |
| H | 1.49933  | 1.37068  | -1.12077 |
| H | 1.69227  | 1.78939  | 0.58549  |
| C | 5.25517  | 0.21787  | -1.05211 |
| C | 4.03601  | 1.10380  | -0.75100 |
| N | 2.98624  | 0.27494  | -0.17227 |
| C | 3.39816  | -0.24200 | 1.14056  |
| C | 4.92418  | -0.42875 | 1.18720  |
| O | 5.42249  | -0.82154 | -0.08323 |
| H | 6.16391  | 0.83727  | -1.10514 |
| H | 5.12604  | -0.28981 | -2.01303 |
| H | 3.67314  | 1.54216  | -1.68615 |
| H | 4.31491  | 1.94849  | -0.09284 |
| H | 3.10246  | 0.44031  | 1.96005  |
| H | 2.89572  | -1.20008 | 1.31688  |
| H | 5.41798  | 0.49573  | 1.52218  |
| H | 5.19186  | -1.22053 | 1.89151  |
| C | -3.94363 | 1.65331  | 0.52421  |
| H | -4.98415 | 1.56577  | 0.85899  |
| H | -3.38541 | 2.12607  | 1.33988  |
| C | -3.87887 | 2.56767  | -0.70965 |
| H | -2.83885 | 2.70317  | -1.02072 |
| H | -4.43748 | 2.13378  | -1.54685 |
| H | -4.30310 | 3.55450  | -0.48960 |
| C | -4.08643 | -0.87891 | 0.06058  |
| C | -5.55245 | -1.16274 | 0.04609  |
| H | -5.89367 | -1.49709 | -0.94224 |

|   |          |          |         |
|---|----------|----------|---------|
| H | -5.82311 | -1.94463 | 0.76701 |
| H | -6.11548 | -0.26228 | 0.30317 |

4s\_Senantiomer\_conformer-070

|   |          |          |          |
|---|----------|----------|----------|
| C | 3.25658  | 0.21159  | -0.02769 |
| N | 2.68785  | -1.95246 | 0.09269  |
| H | 2.76707  | -2.95100 | 0.23084  |
| C | 1.57097  | -1.31653 | -0.34094 |
| C | 1.87639  | 0.04302  | -0.42736 |
| C | -0.52232 | -1.00036 | -1.59483 |
| C | 0.25816  | -1.94603 | -0.66597 |
| H | -1.55301 | -1.35051 | -1.69529 |
| H | -0.06241 | -1.02241 | -2.59011 |
| H | 0.39672  | -2.92466 | -1.14034 |
| H | -0.31703 | -2.12569 | 0.25366  |
| C | 0.88591  | 1.00974  | -0.85159 |
| O | 1.09905  | 2.22149  | -0.97095 |
| C | -0.52617 | 0.45189  | -1.08636 |
| H | -0.98143 | 1.09865  | -1.84355 |
| C | -1.30207 | 0.61520  | 0.24061  |
| H | -0.75160 | 0.10559  | 1.03967  |
| H | -1.32149 | 1.68920  | 0.50394  |
| C | -4.91803 | 0.10501  | -0.69042 |
| C | -3.55387 | 0.78504  | -0.66763 |
| N | -2.64241 | 0.04047  | 0.20216  |
| C | -3.21759 | -0.06753 | 1.54360  |
| C | -4.58595 | -0.73407 | 1.46753  |
| O | -5.46832 | -0.00513 | 0.61884  |
| H | -4.81955 | -0.89585 | -1.14050 |
| H | -5.62950 | 0.68875  | -1.28088 |
| H | -3.67043 | 1.83152  | -0.32473 |
| H | -3.15266 | 0.81038  | -1.68544 |
| H | -2.55001 | -0.67019 | 2.16992  |
| H | -3.32516 | 0.92526  | 2.02185  |
| H | -4.47158 | -1.76385 | 1.09298  |
| H | -5.05589 | -0.76682 | 2.45434  |
| C | 3.99988  | 1.51236  | 0.06988  |
| H | 5.07825  | 1.31915  | 0.11553  |
| H | 3.81982  | 2.10135  | -0.83613 |
| C | 3.57807  | 2.34655  | 1.29035  |
| H | 4.14315  | 3.28491  | 1.33863  |
| H | 2.51351  | 2.59095  | 1.22833  |
| H | 3.75280  | 1.79320  | 2.22009  |
| C | 3.72963  | -1.04268 | 0.29080  |
| C | 5.06425  | -1.51007 | 0.77075  |



|   |         |          |         |
|---|---------|----------|---------|
| H | 5.76591 | -0.67359 | 0.81390 |
| H | 5.00626 | -1.94799 | 1.77559 |
| H | 5.49146 | -2.27200 | 0.10632 |

4s\_Senantiomer\_conformer-071

|   |          |          |          |
|---|----------|----------|----------|
| C | -3.10921 | 0.44990  | 0.06513  |
| N | -2.92221 | -1.70559 | -0.51792 |
| H | -3.16680 | -2.61951 | -0.87477 |
| C | -1.73731 | -1.39186 | 0.06298  |
| C | -1.80384 | -0.04925 | 0.43979  |
| C | 0.30617  | -1.74106 | 1.38977  |
| C | -0.57535 | -2.30558 | 0.26223  |
| H | 1.25629  | -2.28042 | 1.42308  |
| H | -0.20347 | -1.89803 | 2.34801  |
| H | -0.90975 | -3.32072 | 0.50640  |
| H | 0.00742  | -2.38770 | -0.66665 |
| C | -0.68260 | 0.60742  | 1.07762  |
| O | -0.68056 | 1.78951  | 1.44077  |
| C | 0.59021  | -0.23919 | 1.22167  |
| H | 1.09706  | 0.13303  | 2.11879  |
| C | 1.48206  | 0.06659  | -0.00621 |
| H | 0.94094  | -0.21431 | -0.91623 |
| H | 1.62438  | 1.15789  | -0.05496 |
| C | 4.07242  | 0.40069  | -1.79356 |
| C | 3.35041  | -0.85835 | -1.31037 |
| N | 2.73305  | -0.69231 | 0.01105  |
| C | 3.73521  | -0.17696 | 0.95483  |
| C | 4.45436  | 1.06843  | 0.43171  |
| O | 5.05297  | 0.81305  | -0.84012 |
| H | 3.35290  | 1.21751  | -1.96684 |
| H | 4.60911  | 0.21167  | -2.72840 |
| H | 4.08514  | -1.67153 | -1.23822 |
| H | 2.58345  | -1.16180 | -2.03129 |
| H | 3.26029  | 0.03497  | 1.91769  |
| H | 4.47958  | -0.96658 | 1.11994  |
| H | 3.75581  | 1.91644  | 0.34932  |
| H | 5.26654  | 1.36048  | 1.10430  |
| C | -3.60839 | 1.85446  | 0.24456  |
| H | -4.70038 | 1.87377  | 0.14679  |
| H | -3.37361 | 2.19585  | 1.25878  |
| C | -2.98799 | 2.83710  | -0.76173 |
| H | -3.37484 | 3.85168  | -0.60955 |
| H | -3.21339 | 2.53523  | -1.79091 |
| H | -1.90120 | 2.86285  | -0.63924 |
| C | -3.77621 | -0.59982 | -0.52788 |

|   |          |          |          |
|---|----------|----------|----------|
| C | -5.14384 | -0.70319 | -1.11848 |
| H | -5.73190 | -1.50011 | -0.64562 |
| H | -5.68651 | 0.23580  | -0.98535 |
| H | -5.10862 | -0.91749 | -2.19447 |

4s\_Senantiomer\_conformer-072

|   |          |          |          |
|---|----------|----------|----------|
| C | -3.38007 | 0.31377  | -0.20681 |
| N | -3.17034 | -1.89950 | 0.07510  |
| H | -3.41935 | -2.87576 | 0.16061  |
| C | -1.90126 | -1.42052 | 0.06569  |
| C | -1.98050 | -0.03827 | -0.10231 |
| C | 0.50496  | -1.40618 | -0.41796 |
| C | -0.64520 | -2.21199 | 0.20393  |
| H | 0.38645  | -1.39231 | -1.50970 |
| H | 1.46556  | -1.88340 | -0.20731 |
| H | -0.43099 | -2.40174 | 1.26673  |
| H | -0.74033 | -3.19332 | -0.27574 |
| C | -0.79038 | 0.78641  | -0.14788 |
| O | -0.80914 | 2.00902  | -0.32960 |
| C | 0.53841  | 0.04474  | 0.09347  |
| H | 0.65008  | 0.01150  | 1.18954  |
| C | 1.71053  | 0.83806  | -0.49733 |
| H | 1.57055  | 0.91373  | -1.58275 |
| H | 1.68305  | 1.86657  | -0.09849 |
| C | 4.86215  | -0.00036 | 1.35259  |
| C | 3.34143  | 0.14125  | 1.17151  |
| N | 2.99895  | 0.19762  | -0.25695 |
| C | 4.08235  | 0.80154  | -1.02219 |
| C | 5.30896  | -0.12156 | -0.95603 |
| O | 5.42359  | -0.78173 | 0.30817  |
| H | 5.08995  | -0.51377 | 2.29022  |
| H | 5.34191  | 0.98915  | 1.38976  |
| H | 3.00722  | 1.04930  | 1.70832  |
| H | 2.82669  | -0.71354 | 1.62525  |
| H | 3.76994  | 0.90592  | -2.06616 |
| H | 4.33368  | 1.81791  | -0.66400 |
| H | 5.22307  | -0.91888 | -1.70084 |
| H | 6.22283  | 0.45501  | -1.16737 |
| C | -3.94048 | 1.69798  | -0.36235 |
| H | -3.37671 | 2.23125  | -1.13543 |
| H | -4.97950 | 1.63912  | -0.70786 |
| C | -3.88104 | 2.51278  | 0.93972  |
| H | -2.84308 | 2.62040  | 1.26840  |
| H | -4.44631 | 2.01628  | 1.73667  |
| H | -4.30080 | 3.51533  | 0.79525  |

|   |          |          |          |
|---|----------|----------|----------|
| C | -4.09045 | -0.86125 | -0.08965 |
| C | -5.55678 | -1.14307 | -0.11097 |
| H | -5.82020 | -1.86993 | -0.88994 |
| H | -5.90864 | -1.54837 | 0.84654  |
| H | -6.11652 | -0.22553 | -0.30778 |

4s\_Senantiomer\_conformer-073

|   |          |          |          |
|---|----------|----------|----------|
| C | 2.61563  | 0.59547  | 0.36298  |
| N | 2.92316  | -1.61300 | 0.58011  |
| H | 3.35021  | -2.49386 | 0.83298  |
| C | 1.77782  | -1.48236 | -0.13779 |
| C | 1.54417  | -0.11623 | -0.29713 |
| C | -0.01648 | -2.04059 | -1.74369 |
| C | 0.93616  | -2.59612 | -0.66641 |
| H | -0.79584 | -2.77859 | -1.96465 |
| H | 0.54982  | -1.88595 | -2.66945 |
| H | 1.56022  | -3.39220 | -1.09001 |
| H | 0.36473  | -3.06028 | 0.14940  |
| C | 0.38464  | 0.36748  | -1.01943 |
| O | 0.21602  | 1.54336  | -1.35732 |
| C | -0.66844 | -0.70033 | -1.34135 |
| H | -1.24123 | -0.32552 | -2.19564 |
| C | -1.61960 | -0.90264 | -0.14200 |
| H | -2.43049 | -1.57370 | -0.47611 |
| H | -1.08407 | -1.43650 | 0.64993  |
| C | -4.33219 | 0.65922  | -0.58759 |
| C | -2.91043 | 1.19332  | -0.41620 |
| N | -2.08725 | 0.34720  | 0.45958  |
| C | -2.80051 | 0.13653  | 1.72563  |
| C | -4.22993 | -0.37554 | 1.52835  |
| O | -4.97105 | 0.50497  | 0.68239  |
| H | -4.32731 | -0.30529 | -1.12080 |
| H | -4.94770 | 1.36056  | -1.15933 |
| H | -2.96931 | 2.18605  | 0.04933  |
| H | -2.41256 | 1.31696  | -1.38000 |
| H | -2.22964 | -0.55880 | 2.35160  |
| H | -2.84789 | 1.10077  | 2.24911  |
| H | -4.22388 | -1.38941 | 1.09688  |
| H | -4.76636 | -0.41394 | 2.48150  |
| C | 2.78522  | 2.08590  | 0.42621  |
| H | 1.81632  | 2.55010  | 0.64241  |
| H | 3.45402  | 2.34700  | 1.25518  |
| C | 3.33437  | 2.67889  | -0.88113 |
| H | 2.64509  | 2.46602  | -1.70330 |
| H | 4.31158  | 2.24698  | -1.12563 |

|   |         |          |          |
|---|---------|----------|----------|
| H | 3.45081 | 3.76627  | -0.80103 |
| C | 3.45136 | -0.36055 | 0.89882  |
| C | 4.71561 | -0.24571 | 1.68517  |
| H | 4.94130 | 0.80408  | 1.88787  |
| H | 4.64485 | -0.76596 | 2.64881  |
| H | 5.57188 | -0.67136 | 1.14601  |

4s\_Senantiomer\_conformer-074

|   |          |          |          |
|---|----------|----------|----------|
| C | -3.02536 | 0.32024  | -0.46314 |
| N | -2.79236 | -1.87117 | -0.05760 |
| H | -3.00365 | -2.85913 | -0.01680 |
| C | -1.65903 | -1.30015 | 0.42146  |
| C | -1.75805 | 0.07299  | 0.19002  |
| C | 0.29888  | -0.98347 | 1.87986  |
| C | -0.51060 | -2.00459 | 1.06187  |
| H | 1.24648  | -1.42804 | 2.19468  |
| H | -0.26748 | -0.72600 | 2.78295  |
| H | -0.85832 | -2.82305 | 1.70338  |
| H | 0.12853  | -2.46472 | 0.29444  |
| C | -0.68026 | 0.97309  | 0.54147  |
| O | -0.70745 | 2.19662  | 0.36500  |
| C | 0.58771  | 0.30666  | 1.09424  |
| H | 1.04281  | 1.04228  | 1.76656  |
| C | 1.54355  | 0.07873  | -0.10176 |
| H | 1.05382  | -0.58046 | -0.82662 |
| H | 1.68383  | 1.04661  | -0.60888 |
| C | 4.22497  | -0.31234 | -1.73575 |
| C | 3.48383  | -1.26324 | -0.79423 |
| N | 2.79538  | -0.56519 | 0.29818  |
| C | 3.74243  | 0.33160  | 0.97600  |
| C | 4.48321  | 1.25290  | 0.00420  |
| O | 5.15069  | 0.49466  | -1.00607 |
| H | 3.51213  | 0.33196  | -2.27578 |
| H | 4.81231  | -0.86801 | -2.47328 |
| H | 4.21751  | -1.94715 | -0.34668 |
| H | 2.75814  | -1.86637 | -1.35070 |
| H | 3.21483  | 0.92182  | 1.73153  |
| H | 4.48038  | -0.29075 | 1.49843  |
| H | 3.78640  | 1.96497  | -0.46623 |
| H | 5.25663  | 1.82639  | 0.52408  |
| C | -3.56636 | 1.65898  | -0.87417 |
| H | -2.78342 | 2.22023  | -1.39636 |
| H | -4.38863 | 1.52180  | -1.58647 |
| C | -4.05692 | 2.49488  | 0.31873  |
| H | -4.45076 | 3.46210  | -0.01526 |

|   |          |          |          |
|---|----------|----------|----------|
| H | -3.23000 | 2.68179  | 1.01009  |
| H | -4.85140 | 1.97080  | 0.86219  |
| C | -3.64252 | -0.90402 | -0.59968 |
| C | -4.96246 | -1.29389 | -1.17899 |
| H | -5.46634 | -0.41927 | -1.59738 |
| H | -4.85203 | -2.03356 | -1.98218 |
| H | -5.62707 | -1.73010 | -0.42205 |

4s\_Senantiomer\_conformer-075

|   |          |          |          |
|---|----------|----------|----------|
| C | -2.56003 | 0.40956  | 0.11839  |
| N | -2.29658 | -1.21594 | -1.40097 |
| H | -2.46105 | -1.79405 | -2.21408 |
| C | -1.31963 | -1.42822 | -0.48430 |
| C | -1.44123 | -0.43240 | 0.48635  |
| C | 0.27789  | -2.69215 | 0.89695  |
| C | -0.29928 | -2.51354 | -0.51905 |
| H | 1.17043  | -3.32748 | 0.85602  |
| H | -0.46342 | -3.22579 | 1.50468  |
| H | -0.74148 | -3.45457 | -0.86968 |
| H | 0.49952  | -2.24299 | -1.21734 |
| C | -0.51798 | -0.34406 | 1.59349  |
| O | -0.56508 | 0.52985  | 2.46988  |
| C | 0.62113  | -1.37202 | 1.61523  |
| H | 0.79132  | -1.59326 | 2.67675  |
| C | 1.93536  | -0.71653 | 1.12341  |
| H | 2.16012  | 0.12865  | 1.79077  |
| H | 2.73853  | -1.44768 | 1.26459  |
| C | 2.73646  | 2.03044  | -0.27114 |
| C | 1.55530  | 1.08970  | -0.51392 |
| N | 1.90626  | -0.31903 | -0.28831 |
| C | 3.11254  | -0.65358 | -1.05183 |
| C | 4.26475  | 0.31785  | -0.79285 |
| O | 3.86066  | 1.65901  | -1.07121 |
| H | 3.02236  | 2.02318  | 0.79344  |
| H | 2.48309  | 3.05801  | -0.54965 |
| H | 1.22668  | 1.19614  | -1.55604 |
| H | 0.71406  | 1.36515  | 0.12520  |
| H | 3.41413  | -1.68071 | -0.82155 |
| H | 2.85847  | -0.61223 | -2.11973 |
| H | 4.60436  | 0.23919  | 0.25349  |
| H | 5.11577  | 0.10787  | -1.44840 |
| C | -3.03810 | 1.62816  | 0.85400  |
| H | -4.05576 | 1.87776  | 0.53061  |
| H | -3.08977 | 1.40679  | 1.92576  |
| C | -2.12506 | 2.84776  | 0.64892  |

|   |          |          |          |
|---|----------|----------|----------|
| H | -2.51961 | 3.72600  | 1.17375  |
| H | -2.03663 | 3.09546  | -0.41496 |
| H | -1.12561 | 2.63741  | 1.04066  |
| C | -3.06634 | -0.10117 | -1.05624 |
| C | -4.20449 | 0.33092  | -1.92085 |
| H | -3.86445 | 0.64534  | -2.91612 |
| H | -4.93497 | -0.47542 | -2.06524 |
| H | -4.72623 | 1.17685  | -1.46679 |

4s\_Senantiomer\_conformer-076

|   |          |          |          |
|---|----------|----------|----------|
| C | 2.04883  | -0.66654 | 0.51754  |
| N | 2.47604  | 0.50280  | -1.34516 |
| H | 2.90531  | 0.77964  | -2.21769 |
| C | 1.52637  | 1.21670  | -0.68506 |
| C | 1.22040  | 0.51803  | 0.48269  |
| C | 0.27757  | 3.19141  | 0.08953  |
| C | 0.93066  | 2.51188  | -1.12564 |
| H | -0.34131 | 4.03261  | -0.24296 |
| H | 1.07078  | 3.60955  | 0.72110  |
| H | 1.69346  | 3.16694  | -1.56342 |
| H | 0.18357  | 2.34673  | -1.91490 |
| C | 0.21689  | 1.00044  | 1.41143  |
| O | -0.01859 | 0.48582  | 2.50814  |
| C | -0.57324 | 2.23499  | 0.94820  |
| H | -0.84275 | 2.76861  | 1.86553  |
| C | -1.91100 | 1.78512  | 0.26736  |
| H | -2.72696 | 2.00997  | 0.95906  |
| H | -2.09306 | 2.39979  | -0.62902 |
| C | -1.66356 | -1.46765 | -1.64854 |
| C | -1.69112 | 0.04310  | -1.45093 |
| N | -1.98622 | 0.35736  | -0.05673 |
| C | -3.24581 | -0.26466 | 0.34678  |
| C | -3.17629 | -1.76928 | 0.11060  |
| O | -2.89438 | -2.06843 | -1.25381 |
| H | -0.83249 | -1.89435 | -1.06637 |
| H | -1.51989 | -1.71490 | -2.70417 |
| H | -2.43942 | 0.49038  | -2.13418 |
| H | -0.71086 | 0.44399  | -1.71478 |
| H | -3.41057 | -0.07524 | 1.41294  |
| H | -4.10935 | 0.14824  | -0.20996 |
| H | -2.39878 | -2.20521 | 0.75727  |
| H | -4.13529 | -2.24110 | 0.34275  |
| C | 2.04596  | -1.72461 | 1.58326  |
| H | 2.95375  | -2.33400 | 1.49936  |
| H | 2.07497  | -1.24440 | 2.56741  |

|   |          |          |          |
|---|----------|----------|----------|
| C | 0.81150  | -2.63764 | 1.52031  |
| H | -0.09864 | -2.04637 | 1.65251  |
| H | 0.75251  | -3.14865 | 0.55246  |
| H | 0.84484  | -3.39959 | 2.30815  |
| C | 2.80928  | -0.64985 | -0.63257 |
| C | 3.83127  | -1.60146 | -1.16190 |
| H | 4.79483  | -1.10716 | -1.34022 |
| H | 3.99926  | -2.41275 | -0.44951 |
| H | 3.51493  | -2.05281 | -2.11119 |

4s\_Senantiomer\_conformer-077

|   |          |          |          |
|---|----------|----------|----------|
| C | -2.55406 | -0.69793 | -0.20561 |
| N | -3.00439 | 1.12034  | 1.02467  |
| H | -3.49038 | 1.74983  | 1.64928  |
| C | -1.86324 | 1.41907  | 0.35508  |
| C | -1.53901 | 0.30905  | -0.42581 |
| C | -0.18868 | 2.78721  | -0.81864 |
| C | -1.10003 | 2.69930  | 0.41981  |
| H | 0.51466  | 3.61963  | -0.70746 |
| H | -0.80875 | 3.00145  | -1.69725 |
| H | -1.77595 | 3.56152  | 0.46019  |
| H | -0.49797 | 2.73560  | 1.33875  |
| C | -0.36645 | 0.30145  | -1.27481 |
| O | -0.11819 | -0.59500 | -2.09024 |
| C | 0.59850  | 1.48184  | -1.06690 |
| H | 1.18644  | 1.59097  | -1.98358 |
| C | 1.58528  | 1.20185  | 0.09951  |
| H | 1.79177  | 2.14934  | 0.61025  |
| H | 1.08960  | 0.55760  | 0.84499  |
| C | 3.68292  | -0.45634 | 1.73095  |
| C | 3.88339  | 0.68956  | 0.73510  |
| N | 2.88811  | 0.69493  | -0.34665 |
| C | 2.86068  | -0.63980 | -0.96737 |
| C | 2.66832  | -1.76240 | 0.05175  |
| O | 3.68060  | -1.71756 | 1.06122  |
| H | 2.74045  | -0.32803 | 2.28728  |
| H | 4.50294  | -0.49123 | 2.45498  |
| H | 4.87472  | 0.57859  | 0.27601  |
| H | 3.85960  | 1.65356  | 1.25627  |
| H | 2.07556  | -0.67806 | -1.72468 |
| H | 3.82797  | -0.78806 | -1.46551 |
| H | 1.67300  | -1.69785 | 0.52084  |
| H | 2.75275  | -2.74286 | -0.42707 |
| C | -2.57926 | -2.07507 | -0.80273 |
| H | -3.57109 | -2.52061 | -0.66206 |

|   |          |          |          |
|---|----------|----------|----------|
| H | -2.41026 | -2.00512 | -1.88271 |
| C | -1.51250 | -3.00217 | -0.19733 |
| H | -0.51242 | -2.59653 | -0.37799 |
| H | -1.56095 | -4.00180 | -0.64490 |
| H | -1.65254 | -3.10379 | 0.88481  |
| C | -3.44345 | -0.16666 | 0.70271  |
| C | -4.67812 | -0.72544 | 1.32958  |
| H | -5.54930 | -0.08137 | 1.15500  |
| H | -4.90259 | -1.71046 | 0.91340  |
| H | -4.56844 | -0.83988 | 2.41572  |

4s\_Senantiomer\_conformer-078

|   |          |          |          |
|---|----------|----------|----------|
| C | 2.41569  | -0.49786 | -0.28805 |
| N | 2.05756  | 1.41962  | -1.39010 |
| H | 2.15449  | 2.15417  | -2.07810 |
| C | 1.18046  | 1.43816  | -0.35583 |
| C | 1.36811  | 0.25826  | 0.36591  |
| C | -0.27504 | 2.36847  | 1.39651  |
| C | 0.18182  | 2.50541  | -0.06693 |
| H | -1.15523 | 2.99835  | 1.57112  |
| H | 0.52352  | 2.75326  | 2.04293  |
| H | 0.61114  | 3.50054  | -0.23893 |
| H | -0.67495 | 2.39642  | -0.74038 |
| C | 0.53390  | -0.07224 | 1.49742  |
| O | 0.63384  | -1.11875 | 2.15299  |
| C | -0.58538 | 0.92247  | 1.83141  |
| H | -0.67596 | 0.90536  | 2.92509  |
| C | -1.93811 | 0.38685  | 1.30060  |
| H | -2.14466 | -0.56704 | 1.80768  |
| H | -2.71818 | 1.08584  | 1.62103  |
| C | -2.91198 | -2.02413 | -0.53770 |
| C | -1.70262 | -1.09503 | -0.65615 |
| N | -1.98729 | 0.25847  | -0.15992 |
| C | -3.20871 | 0.76936  | -0.78924 |
| C | -4.38823 | -0.19517 | -0.66108 |
| O | -4.05005 | -1.47256 | -1.20259 |
| H | -3.15569 | -2.20538 | 0.52203  |
| H | -2.71312 | -2.98990 | -1.01249 |
| H | -1.41707 | -1.01767 | -1.71335 |
| H | -0.85134 | -1.51201 | -0.11327 |
| H | -3.45795 | 1.74432  | -0.35757 |
| H | -3.00053 | 0.92134  | -1.85711 |
| H | -4.68157 | -0.30321 | 0.39659  |
| H | -5.25589 | 0.16121  | -1.22521 |
| C | 2.96428  | -1.82270 | 0.15616  |



|   |         |          |          |
|---|---------|----------|----------|
| H | 2.13349 | -2.50009 | 0.38335  |
| H | 3.53380 | -2.27946 | -0.66203 |
| C | 3.85806 | -1.71047 | 1.40142  |
| H | 3.28312 | -1.30476 | 2.23905  |
| H | 4.24717 | -2.69245 | 1.69561  |
| H | 4.70986 | -1.04717 | 1.21235  |
| C | 2.82337 | 0.25014  | -1.37017 |
| C | 3.86787 | 0.01042  | -2.41004 |
| H | 4.33303 | -0.96717 | -2.26218 |
| H | 3.44634 | 0.03130  | -3.42320 |
| H | 4.66305 | 0.76627  | -2.37157 |

4s\_Senantiomer\_conformer-079

|   |          |          |          |
|---|----------|----------|----------|
| C | -3.38111 | 0.28832  | 0.26770  |
| N | -3.17180 | -1.89062 | -0.21259 |
| H | -3.42291 | -2.84650 | -0.42640 |
| C | -1.90206 | -1.41756 | -0.14712 |
| C | -1.98089 | -0.05751 | 0.15137  |
| C | 0.47807  | -1.21621 | -0.71409 |
| C | -0.64555 | -2.19590 | -0.34478 |
| H | 0.30790  | -0.83859 | -1.73135 |
| H | 1.44555  | -1.72446 | -0.71913 |
| H | -0.38097 | -2.73050 | 0.58027  |
| H | -0.77043 | -2.95943 | -1.12175 |
| C | -0.78966 | 0.74660  | 0.33225  |
| O | -0.80990 | 1.95893  | 0.57310  |
| C | 0.54450  | -0.02036 | 0.25206  |
| H | 0.70167  | -0.41974 | 1.26731  |
| C | 1.69090  | 0.93819  | -0.09277 |
| H | 1.49109  | 1.37292  | -1.08033 |
| H | 1.69398  | 1.77777  | 0.62237  |
| C | 4.71156  | -1.08922 | 0.87025  |
| C | 3.52017  | -0.15019 | 1.12265  |
| N | 2.99279  | 0.28207  | -0.16577 |
| C | 3.97287  | 1.13458  | -0.85107 |
| C | 5.40497  | 0.66888  | -0.52865 |
| O | 5.44320  | -0.73301 | -0.30512 |
| H | 4.35846  | -2.11100 | 0.70023  |
| H | 5.37779  | -1.09275 | 1.74703  |
| H | 3.81461  | 0.70770  | 1.75717  |
| H | 2.75331  | -0.69930 | 1.67518  |
| H | 3.77812  | 1.08286  | -1.92908 |
| H | 3.87691  | 2.19508  | -0.55003 |
| H | 6.07527  | 0.87492  | -1.36701 |
| H | 5.79627  | 1.20410  | 0.34969  |

|   |          |          |          |
|---|----------|----------|----------|
| C | -3.94053 | 1.65307  | 0.54819  |
| H | -4.98435 | 1.56460  | 0.87230  |
| H | -3.38693 | 2.10740  | 1.37729  |
| C | -3.86059 | 2.59021  | -0.66758 |
| H | -4.41448 | 2.17525  | -1.51742 |
| H | -2.81736 | 2.72595  | -0.96763 |
| H | -4.28140 | 3.57502  | -0.43242 |
| C | -4.09201 | -0.86899 | 0.03488  |
| C | -5.55926 | -1.14477 | 0.00254  |
| H | -6.11969 | -0.24778 | 0.27685  |
| H | -5.89469 | -1.45365 | -0.99602 |
| H | -5.83925 | -1.94222 | 0.70253  |

4s\_Senantiomer\_conformer-080

|   |          |          |          |
|---|----------|----------|----------|
| C | -3.37984 | 0.32737  | -0.19401 |
| N | -3.17211 | -1.89745 | -0.02306 |
| H | -3.42192 | -2.87658 | 0.01288  |
| C | -1.90301 | -1.41918 | 0.00069  |
| C | -1.98099 | -0.03011 | -0.09744 |
| C | 0.50673  | -1.38212 | -0.46463 |
| C | -0.64810 | -2.21719 | 0.10787  |
| H | 0.39666  | -1.31447 | -1.55537 |
| H | 1.46615  | -1.86767 | -0.26945 |
| H | -0.44180 | -2.46043 | 1.16132  |
| H | -0.74004 | -3.17305 | -0.42129 |
| C | -0.79079 | 0.79550  | -0.09053 |
| O | -0.80866 | 2.02636  | -0.20376 |
| C | 0.53741  | 0.04175  | 0.11760  |
| H | 0.64051  | -0.04656 | 1.21151  |
| C | 1.70974  | 0.86418  | -0.43168 |
| H | 1.56377  | 0.99264  | -1.51170 |
| H | 1.68658  | 1.87528  | 0.00823  |
| C | 5.43806  | 0.49790  | -0.58155 |
| C | 4.02860  | 0.84384  | -1.09702 |
| N | 3.00674  | 0.22043  | -0.24602 |
| C | 3.46457  | 0.18078  | 1.13737  |
| C | 4.65756  | -0.78527 | 1.22755  |
| O | 5.45118  | -0.77960 | 0.03850  |
| H | 5.79017  | 1.26570  | 0.12381  |
| H | 6.15157  | 0.45659  | -1.40850 |
| H | 3.88765  | 0.48263  | -2.12285 |
| H | 3.92830  | 1.94563  | -1.11972 |
| H | 3.73534  | 1.18668  | 1.51173  |
| H | 2.66571  | -0.18952 | 1.78510  |
| H | 5.27862  | -0.53256 | 2.10109  |

|   |          |          |          |
|---|----------|----------|----------|
| H | 4.30322  | -1.81437 | 1.34144  |
| C | -3.93977 | 1.71756  | -0.28557 |
| H | -3.36972 | 2.28861  | -1.02642 |
| H | -4.97558 | 1.67534  | -0.64300 |
| C | -3.89302 | 2.46758  | 1.05532  |
| H | -4.31324 | 3.47546  | 0.95637  |
| H | -4.46446 | 1.93203  | 1.82203  |
| H | -2.85818 | 2.56037  | 1.39791  |
| C | -4.09100 | -0.85188 | -0.14147 |
| C | -5.55712 | -1.13197 | -0.18750 |
| H | -6.11571 | -0.20541 | -0.34049 |
| H | -5.81505 | -1.81774 | -1.00463 |
| H | -5.91535 | -1.58603 | 0.74546  |

4s\_Senantiomer\_conformer-081

|   |          |          |          |
|---|----------|----------|----------|
| C | -3.19111 | 0.07484  | -0.39633 |
| N | -2.59698 | -1.96684 | 0.31059  |
| H | -2.65418 | -2.95251 | 0.52880  |
| C | -1.52032 | -1.17961 | 0.55737  |
| C | -1.84399 | 0.10971  | 0.13063  |
| C | 0.48855  | -0.36332 | 1.71848  |
| C | -0.22516 | -1.60692 | 1.16192  |
| H | 1.51298  | -0.62105 | 1.99964  |
| H | -0.03376 | -0.03067 | 2.62352  |
| H | -0.38532 | -2.34684 | 1.95499  |
| H | 0.40711  | -2.09453 | 0.40613  |
| C | -0.88387 | 1.19036  | 0.21036  |
| O | -1.10880 | 2.35227  | -0.14655 |
| C | 0.51523  | 0.79858  | 0.71005  |
| H | 0.91761  | 1.69178  | 1.19922  |
| C | 1.37332  | 0.48416  | -0.53653 |
| H | 0.87779  | -0.29863 | -1.12210 |
| H | 1.40520  | 1.38623  | -1.17558 |
| C | 4.92337  | 0.45201  | 0.72799  |
| C | 3.56108  | 1.03822  | 0.37532  |
| N | 2.71098  | 0.00120  | -0.21080 |
| C | 3.37255  | -0.57658 | -1.38138 |
| C | 4.73526  | -1.13102 | -0.98379 |
| O | 5.55803  | -0.11730 | -0.41312 |
| H | 4.79947  | -0.31509 | 1.50914  |
| H | 5.59284  | 1.23137  | 1.10216  |
| H | 3.69574  | 1.88807  | -0.32180 |
| H | 3.09450  | 1.42507  | 1.28645  |
| H | 2.74929  | -1.38524 | -1.77984 |
| H | 3.50782  | 0.17334  | -2.18467 |

|   |          |          |          |
|---|----------|----------|----------|
| H | 4.60003  | -1.95349 | -0.26327 |
| H | 5.26863  | -1.51172 | -1.85917 |
| C | -3.96351 | 1.24292  | -0.93733 |
| H | -3.32748 | 1.80900  | -1.62690 |
| H | -4.82046 | 0.88184  | -1.51832 |
| C | -4.45710 | 2.19178  | 0.16655  |
| H | -5.02020 | 3.03051  | -0.25958 |
| H | -3.60536 | 2.59708  | 0.72065  |
| H | -5.10953 | 1.66420  | 0.87165  |
| C | -3.62983 | -1.22496 | -0.26821 |
| C | -4.92768 | -1.87554 | -0.61786 |
| H | -5.59417 | -1.15667 | -1.10044 |
| H | -4.78840 | -2.71851 | -1.30665 |
| H | -5.44272 | -2.26163 | 0.27131  |

4s\_Senantiomer\_conformer-082

|   |          |          |          |
|---|----------|----------|----------|
| C | 2.34836  | -0.87541 | -0.19704 |
| N | 3.06719  | 1.10128  | -0.96874 |
| H | 3.64177  | 1.78703  | -1.43982 |
| C | 1.96227  | 1.38754  | -0.23353 |
| C | 1.47649  | 0.17987  | 0.26875  |
| C | 0.42044  | 2.67857  | 1.20156  |
| C | 1.38453  | 2.74369  | 0.00057  |
| H | -0.18360 | 3.59201  | 1.24156  |
| H | 1.01028  | 2.64382  | 2.12486  |
| H | 2.17497  | 3.47927  | 0.19176  |
| H | 0.85662  | 3.09197  | -0.89810 |
| C | 0.29074  | 0.13420  | 1.09917  |
| O | -0.09152 | -0.86960 | 1.70961  |
| C | -0.50577 | 1.44449  | 1.16841  |
| H | -1.07357 | 1.41434  | 2.10354  |
| C | -1.48902 | 1.53707  | -0.01813 |
| H | -2.14932 | 2.41118  | 0.15093  |
| H | -0.92557 | 1.73948  | -0.93521 |
| C | -3.74008 | -0.90293 | -1.76651 |
| C | -3.01695 | 0.41214  | -1.50127 |
| N | -2.25241 | 0.31871  | -0.25825 |
| C | -3.14207 | -0.03481 | 0.84882  |
| C | -3.86884 | -1.33503 | 0.52765  |
| O | -4.60689 | -1.24211 | -0.68821 |
| H | -2.99901 | -1.70410 | -1.91766 |
| H | -4.36564 | -0.82719 | -2.66037 |
| H | -3.76066 | 1.23236  | -1.46214 |
| H | -2.32973 | 0.62532  | -2.32847 |
| H | -2.54647 | -0.18238 | 1.75222  |

|   |          |          |          |
|---|----------|----------|----------|
| H | -3.88386 | 0.76497  | 1.04191  |
| H | -3.13235 | -2.15131 | 0.45677  |
| H | -4.59019 | -1.57779 | 1.31288  |
| C | 2.21979  | -2.33745 | 0.11948  |
| H | 1.16761  | -2.63249 | 0.03724  |
| H | 2.77386  | -2.92630 | -0.62139 |
| C | 2.72019  | -2.68782 | 1.52990  |
| H | 2.13679  | -2.14277 | 2.27748  |
| H | 3.77576  | -2.41744 | 1.64805  |
| H | 2.61732  | -3.76140 | 1.72786  |
| C | 3.32222  | -0.27166 | -0.96281 |
| C | 4.49336  | -0.83124 | -1.70125 |
| H | 4.46596  | -0.57119 | -2.76709 |
| H | 5.44460  | -0.45980 | -1.29854 |
| H | 4.50425  | -1.92111 | -1.62318 |

4s\_Senantiomer\_conformer-083

|   |          |          |          |
|---|----------|----------|----------|
| C | 3.32905  | 0.40700  | -0.33345 |
| N | 3.32787  | -1.78992 | 0.10861  |
| H | 3.66829  | -2.72546 | 0.28511  |
| C | 2.02294  | -1.42088 | 0.13794  |
| C | 1.97196  | -0.05393 | -0.13385 |
| C | -0.32139 | -1.42345 | 0.86542  |
| C | 0.84971  | -2.30258 | 0.40200  |
| H | -0.11273 | -1.04765 | 1.87605  |
| H | -1.24178 | -2.01003 | 0.92670  |
| H | 0.56663  | -2.84245 | -0.51449 |
| H | 1.08838  | -3.06553 | 1.15257  |
| C | 0.70988  | 0.65220  | -0.21879 |
| O | 0.61515  | 1.86620  | -0.43166 |
| C | -0.54871 | -0.22374 | -0.07077 |
| H | -0.74169 | -0.61925 | -1.08131 |
| C | -1.74718 | 0.63034  | 0.36181  |
| H | -1.52572 | 1.06577  | 1.34316  |
| H | -1.85454 | 1.46940  | -0.34663 |
| C | -5.04566 | 1.20501  | 0.17196  |
| C | -4.06513 | 0.57706  | 1.15730  |
| N | -2.97586 | -0.15300 | 0.48227  |
| C | -3.40934 | -0.68602 | -0.81845 |
| C | -4.90280 | -0.97663 | -0.80653 |
| O | -5.68280 | 0.20994  | -0.63906 |
| H | -4.51993 | 1.92770  | -0.47061 |
| H | -5.84044 | 1.74214  | 0.70091  |
| H | -4.61746 | -0.10915 | 1.81312  |
| H | -3.63606 | 1.35351  | 1.79734  |

|   |          |          |          |
|---|----------|----------|----------|
| H | -3.20016 | 0.02704  | -1.63763 |
| H | -2.86189 | -1.60825 | -1.04913 |
| H | -5.20816 | -1.42013 | -1.75895 |
| H | -5.13147 | -1.70007 | -0.00913 |
| C | 3.75742  | 1.81791  | -0.61625 |
| H | 4.78262  | 1.82143  | -1.00525 |
| H | 3.11845  | 2.24032  | -1.39961 |
| C | 3.67788  | 2.72283  | 0.62371  |
| H | 4.00224  | 3.74307  | 0.38681  |
| H | 2.64780  | 2.76669  | 0.98935  |
| H | 4.31532  | 2.33903  | 1.42843  |
| C | 4.14459  | -0.69248 | -0.17489 |
| C | 5.62807  | -0.84874 | -0.24685 |
| H | 6.05237  | -1.16109 | 0.71616  |
| H | 5.92306  | -1.59821 | -0.99234 |
| H | 6.09624  | 0.09915  | -0.52293 |

4s\_Senantiomer\_conformer-084

|   |          |          |          |
|---|----------|----------|----------|
| C | -3.28971 | 0.41608  | -0.23470 |
| N | -3.27972 | -1.80352 | 0.07393  |
| H | -3.61565 | -2.75206 | 0.17253  |
| C | -1.97281 | -1.44146 | 0.05327  |
| C | -1.92705 | -0.06004 | -0.13099 |
| C | 0.42355  | -1.64141 | -0.42898 |
| C | -0.79419 | -2.34384 | 0.18938  |
| H | 0.30811  | -1.61215 | -1.52015 |
| H | 1.32887  | -2.22112 | -0.22253 |
| H | -0.59707 | -2.55587 | 1.25122  |
| H | -0.97614 | -3.31046 | -0.29485 |
| C | -0.66887 | 0.65493  | -0.19189 |
| O | -0.58478 | 1.86882  | -0.40207 |
| C | 0.59196  | -0.19913 | 0.09042  |
| H | 0.65446  | -0.23298 | 1.18982  |
| C | 1.87023  | 0.48628  | -0.42130 |
| H | 2.22234  | -0.04250 | -1.32358 |
| H | 1.61035  | 1.50214  | -0.72926 |
| C | 4.97413  | 0.88611  | -0.75307 |
| C | 3.99060  | 1.51980  | 0.23397  |
| N | 2.89874  | 0.61628  | 0.62060  |
| C | 3.47772  | -0.65420 | 1.08028  |
| C | 4.46421  | -1.25907 | 0.07953  |
| O | 5.50657  | -0.33024 | -0.22489 |
| H | 5.82893  | 1.54570  | -0.93170 |
| H | 4.48394  | 0.68949  | -1.71998 |
| H | 3.56595  | 2.43756  | -0.18798 |

|   |          |          |          |
|---|----------|----------|----------|
| H | 4.54246  | 1.78973  | 1.14449  |
| H | 4.01630  | -0.45512 | 2.01614  |
| H | 2.67835  | -1.36471 | 1.31012  |
| H | 4.95116  | -2.14511 | 0.49822  |
| H | 3.94901  | -1.55743 | -0.84764 |
| C | -3.72522 | 1.84275  | -0.40605 |
| H | -3.12259 | 2.31304  | -1.19051 |
| H | -4.76790 | 1.87148  | -0.74425 |
| C | -3.58490 | 2.66765  | 0.88346  |
| H | -3.91749 | 3.70056  | 0.72662  |
| H | -4.18488 | 2.23355  | 1.69138  |
| H | -2.53914 | 2.69015  | 1.20432  |
| C | -4.10280 | -0.68836 | -0.09958 |
| C | -5.58871 | -0.83673 | -0.11010 |
| H | -5.97127 | -1.18500 | 0.85802  |
| H | -6.06426 | 0.12255  | -0.32812 |
| H | -5.92005 | -1.55565 | -0.87021 |

4s\_Senantiomer\_conformer-085

|   |          |          |          |
|---|----------|----------|----------|
| C | -2.75752 | 0.54782  | 0.21832  |
| N | -3.05677 | -1.30168 | -1.01177 |
| H | -3.48113 | -1.96299 | -1.64814 |
| C | -1.86601 | -1.47887 | -0.38708 |
| C | -1.63457 | -0.34757 | 0.39443  |
| C | 0.45807  | -2.21532 | -0.15136 |
| C | -0.97352 | -2.66934 | -0.47305 |
| H | 0.83576  | -1.60451 | -0.97681 |
| H | 1.11967  | -3.08564 | -0.07566 |
| H | -1.29669 | -3.43855 | 0.24457  |
| H | -1.02031 | -3.12933 | -1.46717 |
| C | -0.47426 | -0.24970 | 1.25367  |
| O | -0.30803 | 0.65897  | 2.07538  |
| C | 0.54958  | -1.40139 | 1.15218  |
| H | 0.28657  | -2.06721 | 1.99014  |
| C | 1.98920  | -0.92643 | 1.42689  |
| H | 1.97422  | -0.25561 | 2.30254  |
| H | 2.59060  | -1.80326 | 1.69088  |
| C | 4.65815  | 0.11847  | -0.99198 |
| C | 4.06607  | -0.16376 | 0.39970  |
| N | 2.62259  | -0.30490 | 0.26910  |
| C | 2.01387  | 0.97297  | -0.12214 |
| C | 2.97708  | 1.76238  | -1.02608 |
| O | 3.77242  | 0.88586  | -1.81116 |
| H | 4.82182  | -0.81956 | -1.53142 |
| H | 5.62564  | 0.63473  | -0.89029 |

|   |          |          |          |
|---|----------|----------|----------|
| H | 4.34789  | 0.63093  | 1.11646  |
| H | 4.48803  | -1.09739 | 0.78495  |
| H | 1.07613  | 0.76722  | -0.65216 |
| H | 1.75816  | 1.59222  | 0.75456  |
| H | 2.41937  | 2.39397  | -1.72242 |
| H | 3.62041  | 2.42052  | -0.42239 |
| C | -2.90796 | 1.91012  | 0.83072  |
| H | -3.93989 | 2.25934  | 0.70697  |
| H | -2.71895 | 1.84690  | 1.90793  |
| C | -1.94273 | 2.94099  | 0.22296  |
| H | -2.10808 | 3.04144  | -0.85580 |
| H | -0.90659 | 2.62887  | 0.38485  |
| H | -2.07931 | 3.92639  | 0.68386  |
| C | -3.61701 | -0.06928 | -0.66436 |
| C | -4.91981 | 0.36305  | -1.25247 |
| H | -5.22684 | 1.32295  | -0.83040 |
| H | -4.85579 | 0.48358  | -2.34169 |
| H | -5.71816 | -0.36240 | -1.05039 |

4s\_Senantiomer\_conformer-086

|   |          |          |          |
|---|----------|----------|----------|
| C | 3.25207  | 0.20316  | -0.03879 |
| N | 2.67559  | -1.96093 | 0.03465  |
| H | 2.75258  | -2.96296 | 0.14636  |
| C | 1.55538  | -1.30950 | -0.36651 |
| C | 1.86561  | 0.05049  | -0.42258 |
| C | -0.55815 | -0.95216 | -1.57649 |
| C | 0.23473  | -1.92494 | -0.68667 |
| H | -1.59277 | -1.29440 | -1.66440 |
| H | -0.11851 | -0.95314 | -2.58113 |
| H | 0.36110  | -2.89086 | -1.18959 |
| H | -0.32518 | -2.12788 | 0.23750  |
| C | 0.87351  | 1.03206  | -0.80709 |
| O | 1.09133  | 2.24559  | -0.89822 |
| C | -0.54420 | 0.48770  | -1.03402 |
| H | -1.01099 | 1.15427  | -1.76696 |
| C | -1.30501 | 0.62346  | 0.30500  |
| H | -1.28814 | 1.68894  | 0.60360  |
| H | -0.76849 | 0.06645  | 1.08156  |
| C | -5.00084 | 0.64275  | -0.32205 |
| C | -3.52051 | 0.86571  | -0.67412 |
| N | -2.65961 | 0.09783  | 0.23649  |
| C | -3.28740 | -0.05269 | 1.54337  |
| C | -4.54912 | -0.91573 | 1.38589  |
| O | -5.21411 | -0.68285 | 0.14074  |
| H | -5.62873 | 0.77446  | -1.20686 |



|   |          |          |          |
|---|----------|----------|----------|
| H | -5.33362 | 1.36989  | 0.43364  |
| H | -3.30487 | 1.94954  | -0.62265 |
| H | -3.32379 | 0.54274  | -1.70264 |
| H | -2.59111 | -0.55798 | 2.22015  |
| H | -3.53115 | 0.92138  | 2.00735  |
| H | -4.28303 | -1.97733 | 1.38671  |
| H | -5.23710 | -0.72843 | 2.22473  |
| C | 4.00185  | 1.49825  | 0.08192  |
| H | 5.08011  | 1.30041  | 0.10554  |
| H | 3.80965  | 2.11198  | -0.80493 |
| C | 3.60186  | 2.30063  | 1.33073  |
| H | 4.17011  | 3.23612  | 1.39497  |
| H | 2.53708  | 2.54888  | 1.29214  |
| H | 3.78979  | 1.72233  | 2.24255  |
| C | 3.72409  | -1.06072 | 0.24086  |
| C | 5.06329  | -1.54539 | 0.68984  |
| H | 5.01783  | -2.00739 | 1.68450  |
| H | 5.47738  | -2.29273 | 0.00100  |
| H | 5.76936  | -0.71319 | 0.74310  |

4s\_Senantiomer\_conformer-087

|   |          |          |          |
|---|----------|----------|----------|
| C | -2.70376 | -0.50954 | 0.32690  |
| N | -2.89194 | 1.69539  | 0.68106  |
| H | -3.25776 | 2.57897  | 1.00943  |
| C | -1.74020 | 1.54477  | -0.01898 |
| C | -1.58017 | 0.18190  | -0.26771 |
| C | 0.58175  | 2.01850  | -0.64293 |
| C | -0.81902 | 2.62471  | -0.47252 |
| H | 0.99871  | 1.79203  | 0.34297  |
| H | 1.25281  | 2.74958  | -1.10763 |
| H | -1.16777 | 3.04297  | -1.42887 |
| H | -0.79844 | 3.45481  | 0.24333  |
| C | -0.45913 | -0.31881 | -1.03416 |
| O | -0.33769 | -1.50144 | -1.37402 |
| C | 0.57608  | 0.73306  | -1.49028 |
| H | 0.24938  | 0.99967  | -2.50888 |
| C | 1.99053  | 0.14320  | -1.64231 |
| H | 1.90991  | -0.83573 | -2.14442 |
| H | 2.56373  | 0.80645  | -2.29938 |
| C | 3.19471  | -1.27014 | 1.63979  |
| C | 2.15521  | -0.91814 | 0.56117  |
| N | 2.71843  | 0.05665  | -0.38135 |
| C | 4.14939  | -0.15691 | -0.54499 |
| C | 4.84736  | 0.16933  | 0.78662  |
| O | 4.03614  | -0.15992 | 1.91718  |

|   |          |          |          |
|---|----------|----------|----------|
| H | 3.79852  | -2.13524 | 1.32603  |
| H | 2.70035  | -1.53531 | 2.57790  |
| H | 1.26039  | -0.48280 | 1.02241  |
| H | 1.83692  | -1.84485 | 0.05402  |
| H | 4.52938  | 0.51483  | -1.32120 |
| H | 4.38721  | -1.18680 | -0.87292 |
| H | 5.81216  | -0.35871 | 0.84391  |
| H | 5.03661  | 1.24464  | 0.86139  |
| C | -2.96442 | -1.98767 | 0.28585  |
| H | -2.02961 | -2.52432 | 0.48125  |
| H | -3.66260 | -2.26204 | 1.08583  |
| C | -3.52748 | -2.45533 | -1.06580 |
| H | -3.71098 | -3.53638 | -1.06209 |
| H | -4.47274 | -1.94836 | -1.29106 |
| H | -2.81493 | -2.23051 | -1.86474 |
| C | -3.49631 | 0.45633  | 0.90817  |
| C | -4.77742 | 0.36411  | 1.66991  |
| H | -4.69200 | 0.81634  | 2.66623  |
| H | -5.59938 | 0.87262  | 1.14959  |
| H | -5.06564 | -0.68171 | 1.80116  |

4s\_Senantiomer\_conformer-088

|   |          |          |          |
|---|----------|----------|----------|
| C | -3.35324 | 0.43262  | 0.27231  |
| N | -3.35946 | -1.79544 | 0.03203  |
| H | -3.70343 | -2.74164 | -0.06123 |
| C | -2.05206 | -1.43695 | -0.01363 |
| C | -1.99633 | -0.05087 | 0.13254  |
| C | 0.30089  | -1.51912 | -0.70398 |
| C | -0.88117 | -2.34600 | -0.17758 |
| H | 0.10674  | -1.23938 | -1.74823 |
| H | 1.22107  | -2.10914 | -0.69320 |
| H | -0.61497 | -2.79973 | 0.78925  |
| H | -1.11452 | -3.17404 | -0.85751 |
| C | -0.73107 | 0.65403  | 0.17088  |
| O | -0.63245 | 1.88162  | 0.27841  |
| C | 0.52410  | -0.23793 | 0.11804  |
| H | 0.70374  | -0.54122 | 1.16294  |
| C | 1.73839  | 0.55495  | -0.37926 |
| H | 1.57671  | 0.80507  | -1.43512 |
| H | 1.79835  | 1.51221  | 0.16287  |
| C | 4.71893  | 0.54556  | 1.33184  |
| C | 3.50522  | -0.34435 | 1.08187  |
| N | 2.98307  | -0.20892 | -0.29443 |
| C | 3.99819  | 0.32347  | -1.21094 |
| C | 5.36984  | -0.21871 | -0.84111 |

|   |          |          |          |
|---|----------|----------|----------|
| O | 5.79926  | 0.23252  | 0.44838  |
| H | 5.09574  | 0.40571  | 2.35024  |
| H | 4.43476  | 1.60330  | 1.22169  |
| H | 2.72306  | -0.08761 | 1.80302  |
| H | 3.78475  | -1.38885 | 1.27322  |
| H | 4.04082  | 1.42838  | -1.19506 |
| H | 3.74846  | 0.02842  | -2.23749 |
| H | 5.34462  | -1.31892 | -0.86354 |
| H | 6.12039  | 0.11799  | -1.56319 |
| C | -3.77821 | 1.86477  | 0.42334  |
| H | -4.80803 | 1.90600  | 0.79778  |
| H | -3.14719 | 2.35251  | 1.17448  |
| C | -3.68039 | 2.65716  | -0.89012 |
| H | -4.30964 | 2.20600  | -1.66583 |
| H | -2.64593 | 2.66631  | -1.24592 |
| H | -4.00383 | 3.69506  | -0.74738 |
| C | -4.17305 | -0.67295 | 0.20393  |
| C | -5.65808 | -0.81556 | 0.27089  |
| H | -6.12442 | 0.15513  | 0.45571  |
| H | -6.07255 | -1.21049 | -0.66572 |
| H | -5.96610 | -1.49436 | 1.07638  |

4s\_Senantiomer\_conformer-089

|   |          |          |          |
|---|----------|----------|----------|
| C | -3.36260 | 0.41667  | -0.23155 |
| N | -3.36423 | -1.76139 | 0.29554  |
| H | -3.70573 | -2.69134 | 0.49781  |
| C | -2.05487 | -1.41663 | 0.21379  |
| C | -2.00209 | -0.06045 | -0.10821 |
| C | 0.32776  | -1.69624 | -0.29995 |
| C | -0.88017 | -2.31155 | 0.42173  |
| H | 0.18314  | -1.78836 | -1.38486 |
| H | 1.24442  | -2.23642 | -0.04908 |
| H | -0.66068 | -2.40652 | 1.49610  |
| H | -1.08345 | -3.32414 | 0.05359  |
| C | -0.73788 | 0.63094  | -0.26022 |
| O | -0.64102 | 1.82183  | -0.57749 |
| C | 0.51557  | -0.20988 | 0.04977  |
| H | 0.64176  | -0.13997 | 1.14314  |
| C | 1.75676  | 0.38407  | -0.62604 |
| H | 1.65120  | 0.25969  | -1.71088 |
| H | 1.79288  | 1.46903  | -0.43794 |
| C | 5.40004  | -0.47746 | -0.61848 |
| C | 4.05628  | -0.08748 | -1.21373 |
| N | 2.99158  | -0.28954 | -0.22484 |
| C | 3.43997  | 0.05171  | 1.14197  |

|   |          |          |          |
|---|----------|----------|----------|
| C | 4.65998  | 0.96787  | 1.14037  |
| O | 5.77471  | 0.36969  | 0.47392  |
| H | 6.18947  | -0.39521 | -1.37235 |
| H | 5.35799  | -1.52442 | -0.28137 |
| H | 3.85078  | -0.70557 | -2.09628 |
| H | 4.11496  | 0.96055  | -1.56191 |
| H | 2.62914  | 0.54454  | 1.68770  |
| H | 3.68475  | -0.86547 | 1.69399  |
| H | 4.40533  | 1.92765  | 0.66537  |
| H | 4.98371  | 1.17844  | 2.16478  |
| C | -3.78885 | 1.82415  | -0.53446 |
| H | -3.19847 | 2.20845  | -1.37331 |
| H | -4.83809 | 1.83133  | -0.85302 |
| C | -3.61356 | 2.77003  | 0.66447  |
| H | -2.56120 | 2.81073  | 0.96082  |
| H | -4.20135 | 2.42481  | 1.52268  |
| H | -3.93863 | 3.78661  | 0.41330  |
| C | -4.18181 | -0.66073 | 0.02788  |
| C | -5.66887 | -0.79481 | 0.05880  |
| H | -6.02105 | -1.57638 | -0.62650 |
| H | -6.03510 | -1.05019 | 1.06159  |
| H | -6.14080 | 0.14543  | -0.23649 |

4s\_Senantiomer\_conformer-090

|   |          |          |          |
|---|----------|----------|----------|
| C | 2.66965  | -0.17599 | 0.08094  |
| N | 2.08508  | 1.18014  | -1.60449 |
| H | 2.11974  | 1.66844  | -2.48930 |
| C | 1.10421  | 1.32068  | -0.67792 |
| C | 1.42348  | 0.48966  | 0.39479  |
| C | -0.65520 | 2.48179  | 0.59776  |
| C | -0.13060 | 2.13993  | -0.80883 |
| H | -1.66010 | 2.91168  | 0.52548  |
| H | -0.00793 | 3.27098  | 0.99767  |
| H | 0.06222  | 3.06236  | -1.36901 |
| H | -0.87998 | 1.58216  | -1.38662 |
| C | 0.55952  | 0.38089  | 1.54833  |
| O | 0.74441  | -0.42296 | 2.47171  |
| C | -0.65817 | 1.31938  | 1.61831  |
| H | -0.56485 | 1.77680  | 2.61282  |
| C | -1.98376 | 0.50385  | 1.76089  |
| H | -1.79072 | -0.22133 | 2.56087  |
| H | -2.75433 | 1.19346  | 2.12428  |
| C | -2.55607 | -2.12033 | -0.87793 |
| C | -1.70319 | -1.20846 | -0.00130 |
| N | -2.55713 | -0.21760 | 0.64016  |

|   |          |          |          |
|---|----------|----------|----------|
| C | -3.34622 | 0.53888  | -0.32130 |
| C | -4.15429 | -0.43271 | -1.17708 |
| O | -3.30029 | -1.36729 | -1.83334 |
| H | -3.24464 | -2.70170 | -0.24431 |
| H | -1.92740 | -2.81123 | -1.44684 |
| H | -0.91735 | -0.74884 | -0.62506 |
| H | -1.20118 | -1.80092 | 0.77151  |
| H | -4.02586 | 1.20675  | 0.22015  |
| H | -2.73431 | 1.16154  | -0.99675 |
| H | -4.87714 | -0.96940 | -0.54228 |
| H | -4.69664 | 0.09991  | -1.96352 |
| C | 3.37435  | -1.19460 | 0.92922  |
| H | 4.42336  | -1.27245 | 0.61908  |
| H | 3.37473  | -0.86042 | 1.97243  |
| C | 2.71549  | -2.58163 | 0.85593  |
| H | 3.25373  | -3.30620 | 1.47854  |
| H | 2.70662  | -2.95501 | -0.17445 |
| H | 1.68283  | -2.52268 | 1.21206  |
| C | 3.05391  | 0.27577  | -1.16275 |
| C | 4.24210  | -0.03818 | -2.01076 |
| H | 3.95318  | -0.51221 | -2.95769 |
| H | 4.81542  | 0.86423  | -2.25868 |
| H | 4.91076  | -0.72541 | -1.48681 |

4s\_Senantiomer\_conformer-091

|   |          |          |          |
|---|----------|----------|----------|
| C | -2.76813 | 0.58598  | 0.26594  |
| N | -3.14459 | -1.22174 | -1.00440 |
| H | -3.60092 | -1.85501 | -1.64722 |
| C | -1.94058 | -1.44224 | -0.42084 |
| C | -1.66097 | -0.33818 | 0.38419  |
| C | 0.37100  | -2.24150 | -0.27152 |
| C | -1.07985 | -2.65024 | -0.56694 |
| H | 0.74199  | -1.61966 | -1.09186 |
| H | 1.01199  | -3.12947 | -0.23628 |
| H | -1.40227 | -3.43265 | 0.13659  |
| H | -1.16521 | -3.07867 | -1.57242 |
| C | -0.47100 | -0.28639 | 1.20573  |
| O | -0.24806 | 0.60527  | 2.03232  |
| C | 0.51296  | -1.46785 | 1.05205  |
| H | 0.23652  | -2.14982 | 1.87266  |
| C | 1.96701  | -1.05026 | 1.32708  |
| H | 1.97688  | -0.37925 | 2.20229  |
| H | 2.53696  | -1.94744 | 1.59368  |
| C | 2.82247  | 1.36457  | -1.45496 |
| C | 2.06768  | 0.82987  | -0.24343 |

|   |          |          |          |
|---|----------|----------|----------|
| N | 2.64367  | -0.44901 | 0.17667  |
| C | 4.07219  | -0.28214 | 0.44542  |
| C | 4.77713  | 0.27499  | -0.78497 |
| O | 4.21210  | 1.52064  | -1.18332 |
| H | 2.44525  | 2.35187  | -1.73579 |
| H | 2.68351  | 0.67701  | -2.30493 |
| H | 1.01982  | 0.68798  | -0.52399 |
| H | 2.09449  | 1.57628  | 0.57187  |
| H | 4.24742  | 0.39916  | 1.30099  |
| H | 4.50297  | -1.25656 | 0.70345  |
| H | 5.83351  | 0.46271  | -0.57337 |
| H | 4.70317  | -0.45050 | -1.61098 |
| C | -2.87113 | 1.93294  | 0.92061  |
| H | -3.90082 | 2.30217  | 0.84648  |
| H | -2.64224 | 1.83614  | 1.98755  |
| C | -1.91236 | 2.96470  | 0.30420  |
| H | -2.01411 | 3.93884  | 0.79690  |
| H | -0.87616 | 2.63180  | 0.41716  |
| H | -2.11725 | 3.09802  | -0.76414 |
| C | -3.66684 | 0.01222  | -0.60671 |
| C | -4.97692 | 0.48847  | -1.14210 |
| H | -5.24907 | 1.44296  | -0.68525 |
| H | -4.94349 | 0.63730  | -2.22916 |
| H | -5.78477 | -0.22479 | -0.93463 |

4s\_Senantiomer\_conformer-092

|   |          |          |          |
|---|----------|----------|----------|
| C | 2.55132  | 0.24833  | -0.41890 |
| N | 1.89762  | 1.72320  | 1.13633  |
| H | 1.87267  | 2.55905  | 1.70470  |
| C | 1.01709  | 0.69541  | 1.22848  |
| C | 1.38577  | -0.25412 | 0.27687  |
| C | -0.57493 | -0.84505 | 2.30807  |
| C | -0.18084 | 0.62981  | 2.10855  |
| H | -1.55942 | -0.90579 | 2.78443  |
| H | 0.14094  | -1.27476 | 3.01843  |
| H | 0.01466  | 1.09803  | 3.08045  |
| H | -1.00107 | 1.20129  | 1.65339  |
| C | 0.60845  | -1.45462 | 0.06888  |
| O | 0.82565  | -2.26317 | -0.84341 |
| C | -0.55644 | -1.72592 | 1.03695  |
| H | -0.36768 | -2.75485 | 1.37267  |
| C | -1.90389 | -1.88059 | 0.26079  |
| H | -1.68324 | -2.57041 | -0.56307 |
| H | -2.61056 | -2.38567 | 0.92922  |
| C | -2.80523 | 0.99047  | -2.00096 |

|   |          |          |          |
|---|----------|----------|----------|
| C | -1.84246 | 0.09352  | -1.22892 |
| N | -2.59624 | -0.73376 | -0.29651 |
| C | -3.42953 | 0.05781  | 0.59676  |
| C | -4.34862 | 0.94612  | -0.23736 |
| O | -3.59502 | 1.78054  | -1.11447 |
| H | -3.46155 | 0.36971  | -2.63145 |
| H | -2.25792 | 1.69068  | -2.63848 |
| H | -1.09551 | 0.72792  | -0.72162 |
| H | -1.30031 | -0.55581 | -1.92508 |
| H | -4.03138 | -0.61660 | 1.21643  |
| H | -2.85033 | 0.70740  | 1.27591  |
| H | -5.03803 | 0.31640  | -0.82189 |
| H | -4.93156 | 1.61360  | 0.40371  |
| C | 3.30773  | -0.45524 | -1.50811 |
| H | 2.59909  | -0.82478 | -2.25728 |
| H | 3.96885  | 0.25658  | -2.01653 |
| C | 4.13654  | -1.64118 | -0.98955 |
| H | 4.68063  | -2.12724 | -1.80795 |
| H | 4.86652  | -1.31037 | -0.24197 |
| H | 3.48123  | -2.38468 | -0.52616 |
| C | 2.84715  | 1.47118  | 0.14280  |
| C | 3.93989  | 2.45238  | -0.12735 |
| H | 4.54169  | 2.12545  | -0.97869 |
| H | 3.54287  | 3.44860  | -0.36011 |
| H | 4.61261  | 2.56141  | 0.73323  |

4s\_Senantiomer\_conformer-093

|   |          |          |          |
|---|----------|----------|----------|
| C | 2.76823  | 0.57931  | -0.26118 |
| N | 3.11416  | -1.26445 | 0.96539  |
| H | 3.55959  | -1.91968 | 1.59368  |
| C | 1.90841  | -1.45251 | 0.37433  |
| C | 1.64769  | -0.32507 | -0.40451 |
| C | -0.41567 | -2.20988 | 0.20239  |
| C | 1.02754  | -2.64925 | 0.49162  |
| H | -0.77719 | -1.59891 | 1.03514  |
| H | -1.07180 | -3.08564 | 0.14749  |
| H | 1.33841  | -3.42081 | -0.22889 |
| H | 1.10363  | -3.10160 | 1.48733  |
| C | 0.45946  | -0.23428 | -1.22487 |
| O | 0.24754  | 0.68505  | -2.02386 |
| C | -0.53980 | -1.40690 | -1.10518 |
| H | -0.26527 | -2.07474 | -1.93802 |
| C | -1.98451 | -0.96226 | -1.38271 |
| H | -1.97765 | -0.27312 | -2.24421 |
| H | -2.56580 | -1.84428 | -1.67686 |

|   |          |          |          |
|---|----------|----------|----------|
| C | -4.72642 | 0.80291  | 0.45474  |
| C | -4.09878 | -0.20971 | -0.51722 |
| N | -2.66856 | -0.38192 | -0.23006 |
| C | -2.09587 | 0.85411  | 0.28913  |
| C | -2.73687 | 1.15264  | 1.65498  |
| O | -4.10176 | 0.73332  | 1.72765  |
| H | -5.78638 | 0.58376  | 0.60728  |
| H | -4.65228 | 1.82360  | 0.04995  |
| H | -4.26948 | 0.15013  | -1.54961 |
| H | -4.58803 | -1.18783 | -0.42964 |
| H | -1.02148 | 0.73320  | 0.44096  |
| H | -2.21992 | 1.70224  | -0.40934 |
| H | -2.21556 | 0.60076  | 2.44357  |
| H | -2.65778 | 2.22873  | 1.87500  |
| C | 2.89397  | 1.94016  | -0.88239 |
| H | 3.92853  | 2.29223  | -0.79408 |
| H | 2.66979  | 1.87305  | -1.95264 |
| C | 1.94720  | 2.97083  | -0.24593 |
| H | 2.14600  | 3.07265  | 0.82702  |
| H | 0.90671  | 2.65807  | -0.37555 |
| H | 2.06863  | 3.95576  | -0.71200 |
| C | 3.65600  | -0.02923 | 0.59894  |
| C | 4.97189  | 0.41350  | 1.14870  |
| H | 5.76919  | -0.30684 | 0.92548  |
| H | 5.25990  | 1.37459  | 0.71610  |
| H | 4.93792  | 0.53606  | 2.23902  |

4s\_Senantiomer\_conformer-094

|   |          |          |          |
|---|----------|----------|----------|
| C | 3.24754  | 0.18117  | -0.05116 |
| N | 2.64181  | -1.96452 | 0.17269  |
| H | 2.70467  | -2.95714 | 0.35487  |
| C | 1.53190  | -1.32865 | -0.27863 |
| C | 1.86048  | 0.01984  | -0.42936 |
| C | -0.56852 | -1.03092 | -1.52507 |
| C | 0.20460  | -1.94804 | -0.56198 |
| H | -1.60657 | -1.36512 | -1.59945 |
| H | -0.11944 | -1.10625 | -2.52271 |
| H | 0.32049  | -2.94945 | -0.99290 |
| H | -0.36366 | -2.07556 | 0.37054  |
| C | 0.88265  | 0.98455  | -0.88604 |
| O | 1.11556  | 2.18608  | -1.06010 |
| C | -0.54120 | 0.44232  | -1.08261 |
| H | -0.99157 | 1.06220  | -1.86506 |
| C | -1.30241 | 0.68058  | 0.24172  |
| H | -1.29501 | 1.76476  | 0.46140  |



|   |          |          |          |
|---|----------|----------|----------|
| H | -0.75454 | 0.19514  | 1.05812  |
| C | -4.84677 | -0.04887 | -0.77829 |
| C | -3.58668 | 0.82068  | -0.63381 |
| N | -2.65084 | 0.13181  | 0.24641  |
| C | -3.19028 | 0.06155  | 1.61108  |
| C | -4.72347 | -0.07585 | 1.57059  |
| O | -5.13734 | -0.78523 | 0.41229  |
| H | -4.70072 | -0.79914 | -1.56143 |
| H | -5.70623 | 0.58103  | -1.05561 |
| H | -3.83854 | 1.83072  | -0.25854 |
| H | -3.13815 | 0.95536  | -1.62128 |
| H | -2.73350 | -0.79794 | 2.11625  |
| H | -2.93787 | 0.96297  | 2.20054  |
| H | -5.08209 | -0.64128 | 2.43443  |
| H | -5.20032 | 0.91543  | 1.60000  |
| C | 4.01431  | 1.47157  | -0.01903 |
| H | 5.08974  | 1.26162  | 0.02221  |
| H | 3.83283  | 2.02414  | -0.94741 |
| C | 3.62198  | 2.36469  | 1.16913  |
| H | 4.20223  | 3.29500  | 1.16935  |
| H | 2.56058  | 2.62326  | 1.10986  |
| H | 3.80025  | 1.84940  | 2.11982  |
| C | 3.70159  | -1.06581 | 0.31937  |
| C | 5.03249  | -1.53500 | 0.80784  |
| H | 4.97813  | -1.92023 | 1.83425  |
| H | 5.43668  | -2.33804 | 0.17837  |
| H | 5.75082  | -0.71168 | 0.80064  |

4s\_Senantiomer\_conformer-095

|   |          |          |          |
|---|----------|----------|----------|
| C | -2.72890 | -0.52514 | 0.35213  |
| N | -2.96363 | 1.69819  | 0.50771  |
| H | -3.35183 | 2.59940  | 0.75183  |
| C | -1.79146 | 1.51005  | -0.14754 |
| C | -1.60251 | 0.13358  | -0.27334 |
| C | 0.53816  | 1.97039  | -0.75652 |
| C | -0.87499 | 2.56534  | -0.66521 |
| H | 0.93469  | 1.83140  | 0.25393  |
| H | 1.20961  | 2.67190  | -1.26375 |
| H | -1.20658 | 2.89998  | -1.65985 |
| H | -0.88329 | 3.45016  | -0.01801 |
| C | -0.45000 | -0.41090 | -0.95851 |
| O | -0.28268 | -1.61848 | -1.16450 |
| C | 0.56301  | 0.62281  | -1.50036 |
| H | 0.22297  | 0.80492  | -2.53327 |
| C | 1.98221  | 0.04651  | -1.62163 |

|   |          |          |          |
|---|----------|----------|----------|
| H | 1.91057  | -0.98258 | -2.01292 |
| H | 2.52932  | 0.63889  | -2.36459 |
| C | 3.00212  | -0.27772 | 1.99817  |
| C | 2.26116  | -0.69720 | 0.71728  |
| N | 2.76426  | 0.10629  | -0.38988 |
| C | 4.17301  | -0.20947 | -0.65832 |
| C | 4.89452  | -0.59942 | 0.64278  |
| O | 4.35608  | 0.10865  | 1.74927  |
| H | 2.96997  | -1.09782 | 2.73238  |
| H | 2.52098  | 0.60020  | 2.44087  |
| H | 1.19609  | -0.50702 | 0.86285  |
| H | 2.36238  | -1.78220 | 0.52961  |
| H | 4.64233  | 0.67092  | -1.11478 |
| H | 4.27735  | -1.04519 | -1.37621 |
| H | 4.82247  | -1.68414 | 0.81398  |
| H | 5.95565  | -0.34324 | 0.58630  |
| C | -2.96214 | -2.00610 | 0.43310  |
| H | -2.02554 | -2.50387 | 0.70713  |
| H | -3.68388 | -2.22333 | 1.22966  |
| C | -3.46770 | -2.60198 | -0.89054 |
| H | -4.41330 | -2.13682 | -1.19169 |
| H | -2.73149 | -2.43314 | -1.68182 |
| H | -3.63160 | -3.68216 | -0.79771 |
| C | -3.55310 | 0.47201  | 0.82633  |
| C | -4.85324 | 0.42179  | 1.55903  |
| H | -4.80308 | 0.95941  | 2.51445  |
| H | -5.66834 | 0.86834  | 0.97502  |
| H | -5.12791 | -0.61405 | 1.77251  |

4s\_Senantiomer\_conformer-096

|   |          |          |          |
|---|----------|----------|----------|
| C | -3.18425 | 0.06480  | -0.37665 |
| N | -2.55146 | -1.98564 | 0.26869  |
| H | -2.59190 | -2.97721 | 0.46257  |
| C | -1.48199 | -1.18990 | 0.51936  |
| C | -1.82964 | 0.10515  | 0.13050  |
| C | 0.53269  | -0.37508 | 1.67107  |
| C | -0.17206 | -1.61423 | 1.09350  |
| H | 1.56485  | -0.62422 | 1.93032  |
| H | 0.01900  | -0.07269 | 2.59155  |
| H | -0.31013 | -2.37625 | 1.86961  |
| H | 0.45492  | -2.07386 | 0.31616  |
| C | -0.88253 | 1.19633  | 0.22216  |
| O | -1.12777 | 2.36336  | -0.10359 |
| C | 0.52871  | 0.81169  | 0.69196  |
| H | 0.92521  | 1.69783  | 1.19881  |

|   |          |          |          |
|---|----------|----------|----------|
| C | 1.37464  | 0.54206  | -0.57348 |
| H | 1.38074  | 1.45752  | -1.19444 |
| H | 0.88262  | -0.23465 | -1.17102 |
| C | 4.84052  | 0.34935  | 0.86994  |
| C | 3.59707  | 1.06673  | 0.31754  |
| N | 2.72050  | 0.06909  | -0.28334 |
| C | 3.35012  | -0.51116 | -1.47647 |
| C | 4.87582  | -0.59562 | -1.28323 |
| O | 5.20223  | -0.78959 | 0.08505  |
| H | 4.64017  | -0.03591 | 1.87438  |
| H | 5.68417  | 1.05440  | 0.92935  |
| H | 3.87869  | 1.85659  | -0.40452 |
| H | 3.08296  | 1.56493  | 1.14326  |
| H | 2.92053  | -1.50666 | -1.64068 |
| H | 3.14714  | 0.08946  | -2.38311 |
| H | 5.28697  | -1.44684 | -1.83175 |
| H | 5.36367  | 0.31389  | -1.66491 |
| C | -3.98106 | 1.23516  | -0.87572 |
| H | -3.36435 | 1.82658  | -1.56157 |
| H | -4.84274 | 0.87668  | -1.45127 |
| C | -4.46888 | 2.15000  | 0.25912  |
| H | -5.05113 | 2.99037  | -0.13698 |
| H | -5.10151 | 1.59617  | 0.96214  |
| H | -3.61368 | 2.55440  | 0.80849  |
| C | -3.60315 | -1.24389 | -0.27525 |
| C | -4.89688 | -1.90392 | -0.62240 |
| H | -4.75666 | -2.72466 | -1.33739 |
| H | -5.39132 | -2.32307 | 0.26348  |
| H | -5.58186 | -1.18187 | -1.07330 |

4s\_Senantiomer\_conformer-097

|   |          |          |          |
|---|----------|----------|----------|
| C | 3.21867  | 0.35309  | -0.08656 |
| N | 2.89148  | -1.78229 | 0.50852  |
| H | 3.07958  | -2.71122 | 0.86077  |
| C | 1.71679  | -1.38380 | -0.04054 |
| C | 1.87091  | -0.05026 | -0.42379 |
| C | -0.38371 | -1.58112 | -1.30791 |
| C | 0.48541  | -2.20970 | -0.20509 |
| H | -1.36913 | -2.05472 | -1.31497 |
| H | 0.08636  | -1.77176 | -2.28015 |
| H | 0.73646  | -3.24677 | -0.45694 |
| H | -0.07677 | -2.24757 | 0.73894  |
| C | 0.78492  | 0.68623  | -1.03491 |
| O | 0.86365  | 1.86130  | -1.41125 |
| C | -0.55254 | -0.06212 | -1.13188 |

|   |          |          |          |
|---|----------|----------|----------|
| H | -1.06476 | 0.34772  | -2.00886 |
| C | -1.37211 | 0.30290  | 0.12756  |
| H | -1.47660 | 1.40416  | 0.15538  |
| H | -0.80485 | 0.01163  | 1.01795  |
| C | -5.00636 | -0.18182 | -0.54234 |
| C | -3.55184 | 0.07237  | -0.90919 |
| N | -2.66122 | -0.37707 | 0.17202  |
| C | -3.32190 | -0.30404 | 1.48850  |
| C | -4.37388 | 0.79865  | 1.55078  |
| O | -5.41850 | 0.58152  | 0.59414  |
| H | -5.15810 | -1.25603 | -0.35684 |
| H | -5.65986 | 0.11090  | -1.36943 |
| H | -3.42614 | 1.15214  | -1.11131 |
| H | -3.31250 | -0.45765 | -1.83902 |
| H | -3.80484 | -1.26466 | 1.71135  |
| H | -2.56663 | -0.13950 | 2.26244  |
| H | -4.84684 | 0.83076  | 2.53832  |
| H | -3.90208 | 1.77664  | 1.37052  |
| C | 3.81178  | 1.71807  | -0.28404 |
| H | 4.90435  | 1.66050  | -0.21100 |
| H | 3.57793  | 2.07154  | -1.29429 |
| C | 3.28506  | 2.74594  | 0.73050  |
| H | 3.51105  | 2.43259  | 1.75613  |
| H | 3.73978  | 3.72977  | 0.56471  |
| H | 2.20043  | 2.84880  | 0.63138  |
| C | 3.82348  | -0.74147 | 0.49180  |
| C | 5.19475  | -0.94238 | 1.04763  |
| H | 5.17270  | -1.14276 | 2.12664  |
| H | 5.70790  | -1.78623 | 0.56909  |
| H | 5.80296  | -0.04856 | 0.88910  |

#### 4s\_Senantiomer\_conformer-098

|   |          |          |          |
|---|----------|----------|----------|
| C | -2.67540 | -0.69081 | -0.21804 |
| N | -3.11205 | 1.22148  | 0.86394  |
| H | -3.60340 | 1.91092  | 1.41664  |
| C | -1.92466 | 1.42991  | 0.23778  |
| C | -1.60933 | 0.25736  | -0.44824 |
| C | -0.08832 | 2.65536  | -0.87874 |
| C | -1.11932 | 2.68661  | 0.26755  |
| H | 0.66374  | 3.43661  | -0.72078 |
| H | -0.59992 | 2.88951  | -1.81954 |
| H | -1.76350 | 3.56872  | 0.17003  |
| H | -0.61206 | 2.78740  | 1.23715  |
| C | -0.40579 | 0.15655  | -1.24921 |
| O | -0.17531 | -0.75847 | -2.04548 |

|   |          |          |          |
|---|----------|----------|----------|
| C | 0.60799  | 1.28594  | -1.03194 |
| H | 1.23916  | 1.31751  | -1.92575 |
| C | 1.48681  | 0.98300  | 0.20133  |
| H | 2.28960  | 1.74053  | 0.22858  |
| H | 0.89058  | 1.13149  | 1.10751  |
| C | 4.27965  | -0.22174 | -0.66491 |
| C | 2.87138  | -0.79094 | -0.83392 |
| N | 1.96680  | -0.39892 | 0.25655  |
| C | 2.59379  | -0.73477 | 1.54094  |
| C | 4.01243  | -0.17507 | 1.67731  |
| O | 4.83490  | -0.61128 | 0.59401  |
| H | 4.27063  | 0.87755  | -0.74301 |
| H | 4.95428  | -0.61154 | -1.43337 |
| H | 2.93906  | -1.88670 | -0.82492 |
| H | 2.43662  | -0.50128 | -1.79268 |
| H | 1.96052  | -0.37250 | 2.35873  |
| H | 2.64525  | -1.82926 | 1.61329  |
| H | 3.99485  | 0.92619  | 1.71192  |
| H | 4.48898  | -0.53731 | 2.59351  |
| C | -2.71479 | -2.10607 | -0.71706 |
| H | -3.72858 | -2.51037 | -0.61168 |
| H | -2.47291 | -2.11928 | -1.78508 |
| C | -1.72079 | -3.01617 | 0.02376  |
| H | -1.75550 | -4.03920 | -0.36903 |
| H | -0.70053 | -2.63856 | -0.09337 |
| H | -1.95062 | -3.05244 | 1.09480  |
| C | -3.58718 | -0.06597 | 0.60504  |
| C | -4.87305 | -0.53573 | 1.20158  |
| H | -5.70756 | 0.12858  | 0.94333  |
| H | -5.11742 | -1.53591 | 0.83555  |
| H | -4.82177 | -0.58541 | 2.29697  |

4s\_Senantiomer\_conformer-099

|   |          |          |          |
|---|----------|----------|----------|
| C | 3.06121  | 0.62990  | 0.23126  |
| N | 3.57615  | -1.39285 | -0.58470 |
| H | 4.12551  | -2.16467 | -0.93805 |
| C | 2.24186  | -1.43552 | -0.34266 |
| C | 1.87132  | -0.19040 | 0.16274  |
| C | 0.08284  | -2.41013 | 0.31381  |
| C | 1.32971  | -2.59328 | -0.56549 |
| H | 0.34855  | -2.59158 | 1.36361  |
| H | -0.67415 | -3.15233 | 0.03903  |
| H | 1.02856  | -2.64014 | -1.62305 |
| H | 1.83001  | -3.54253 | -0.34035 |
| C | 0.50036  | 0.10056  | 0.53056  |

|   |          |          |          |
|---|----------|----------|----------|
| O | 0.14954  | 1.16328  | 1.05391  |
| C | -0.52525 | -0.99769 | 0.18353  |
| H | -0.76433 | -0.85029 | -0.88114 |
| C | -1.84259 | -0.86543 | 0.97344  |
| H | -2.14259 | -1.85879 | 1.32509  |
| H | -1.67776 | -0.23888 | 1.86649  |
| C | -4.10291 | 1.64163  | -0.70976 |
| C | -2.75841 | 1.04296  | -0.25534 |
| N | -2.94284 | -0.35899 | 0.15302  |
| C | -4.24511 | -0.52113 | 0.78745  |
| C | -5.33633 | -0.31031 | -0.27702 |
| O | -4.94659 | 0.64364  | -1.26722 |
| H | -3.94734 | 2.39412  | -1.48727 |
| H | -4.60924 | 2.13541  | 0.13380  |
| H | -2.35157 | 1.65599  | 0.56517  |
| H | -2.02711 | 1.07746  | -1.07048 |
| H | -4.32905 | -1.53578 | 1.19009  |
| H | -4.38649 | 0.17093  | 1.63991  |
| H | -5.52159 | -1.24191 | -0.82053 |
| H | -6.27556 | 0.00324  | 0.20540  |
| C | 3.13122  | 2.05943  | 0.68500  |
| H | 2.58422  | 2.16644  | 1.62808  |
| H | 4.17392  | 2.33145  | 0.88772  |
| C | 2.53790  | 3.03895  | -0.34038 |
| H | 1.48170  | 2.81022  | -0.51081 |
| H | 3.06614  | 2.96886  | -1.29810 |
| H | 2.61130  | 4.07304  | 0.01659  |
| C | 4.09868  | -0.14305 | -0.24355 |
| C | 5.55242  | 0.14628  | -0.42482 |
| H | 5.78938  | 1.14637  | -0.05395 |
| H | 6.18081  | -0.57039 | 0.11922  |
| H | 5.84844  | 0.10458  | -1.48099 |

4s\_Senantiomer\_conformer-100

|   |          |          |          |
|---|----------|----------|----------|
| C | -3.02744 | -0.65411 | -0.25785 |
| N | -3.50506 | 1.51948  | -0.52146 |
| H | -4.03431 | 2.36372  | -0.69337 |
| C | -2.18764 | 1.48053  | -0.19969 |
| C | -1.84156 | 0.14144  | -0.02532 |
| C | -0.06023 | 2.21701  | 0.78587  |
| C | -1.26681 | 2.64500  | -0.06359 |
| H | -0.37189 | 2.11211  | 1.83342  |
| H | 0.70830  | 2.99657  | 0.75389  |
| H | -0.91954 | 2.97117  | -1.05566 |
| H | -1.77657 | 3.50438  | 0.38765  |

|   |          |          |          |
|---|----------|----------|----------|
| C | -0.48583 | -0.25507 | 0.29911  |
| O | -0.15549 | -1.42479 | 0.52108  |
| C | 0.55342  | 0.88485  | 0.30565  |
| H | 0.83958  | 1.02734  | -0.74780 |
| C | 1.83393  | 0.52998  | 1.08822  |
| H | 2.10722  | 1.38215  | 1.72025  |
| H | 1.63426  | -0.32283 | 1.75896  |
| C | 4.19024  | -1.42420 | -1.11129 |
| C | 2.82050  | -0.95630 | -0.58626 |
| N | 2.97607  | 0.27146  | 0.21128  |
| C | 4.24502  | 0.23961  | 0.92816  |
| C | 5.38877  | 0.32457  | -0.09770 |
| O | 5.05857  | -0.32093 | -1.32962 |
| H | 4.08116  | -1.93605 | -2.07099 |
| H | 4.65105  | -2.13369 | -0.40722 |
| H | 2.36507  | -1.76849 | 0.00274  |
| H | 2.14079  | -0.74889 | -1.42023 |
| H | 4.30337  | 1.10135  | 1.60097  |
| H | 4.34825  | -0.66315 | 1.56029  |
| H | 5.59012  | 1.36893  | -0.35533 |
| H | 6.30667  | -0.11155 | 0.32678  |
| C | -3.13480 | -2.14799 | -0.15014 |
| H | -4.03332 | -2.49208 | -0.67610 |
| H | -2.27683 | -2.60962 | -0.65113 |
| C | -3.17636 | -2.63802 | 1.30612  |
| H | -4.03170 | -2.20692 | 1.83871  |
| H | -2.26055 | -2.34308 | 1.82660  |
| H | -3.26040 | -3.73031 | 1.35063  |
| C | -4.04005 | 0.23006  | -0.56210 |
| C | -5.48295 | 0.01623  | -0.88274 |
| H | -5.70893 | -1.05215 | -0.91964 |
| H | -6.13976 | 0.46877  | -0.12863 |
| H | -5.75315 | 0.44985  | -1.85391 |

4s\_Senantiomer\_conformer-101

|   |          |          |          |
|---|----------|----------|----------|
| C | 3.38010  | -0.31376 | -0.20682 |
| N | 3.17038  | 1.89950  | 0.07506  |
| H | 3.41938  | 2.87577  | 0.16058  |
| C | 1.90130  | 1.42052  | 0.06567  |
| C | 1.98054  | 0.03827  | -0.10232 |
| C | -0.50491 | 1.40617  | -0.41806 |
| C | 0.64523  | 2.21199  | 0.20386  |
| H | -0.38633 | 1.39226  | -1.50979 |
| H | -1.46551 | 1.88342  | -0.20749 |
| H | 0.43097  | 2.40174  | 1.26666  |

|   |          |          |          |
|---|----------|----------|----------|
| H | 0.74037  | 3.19332  | -0.27580 |
| C | 0.79041  | -0.78641 | -0.14787 |
| O | 0.80919  | -2.00903 | -0.32954 |
| C | -0.53838 | -0.04473 | 0.09344  |
| H | -0.65005 | -0.01143 | 1.18951  |
| C | -1.71052 | -0.83809 | -0.49732 |
| H | -1.57057 | -0.91378 | -1.58274 |
| H | -1.68304 | -1.86658 | -0.09845 |
| C | -4.86215 | 0.00056  | 1.35263  |
| C | -3.34145 | -0.14137 | 1.17153  |
| N | -2.99895 | -0.19764 | -0.25693 |
| C | -4.08233 | -0.80153 | -1.02223 |
| C | -5.30902 | 0.12150  | -0.95598 |
| O | -5.42344 | 0.78190  | 0.30811  |
| H | -5.08984 | 0.51411  | 2.29021  |
| H | -5.34212 | -0.98885 | 1.38993  |
| H | -3.00741 | -1.04956 | 1.70822  |
| H | -2.82653 | 0.71327  | 1.62535  |
| H | -3.76992 | -0.90584 | -2.06620 |
| H | -4.33361 | -1.81794 | -0.66409 |
| H | -5.22332 | 0.91871  | -1.70093 |
| H | -6.22290 | -0.45515 | -1.16705 |
| C | 3.94054  | -1.69797 | -0.36232 |
| H | 3.37706  | -2.23117 | -1.13568 |
| H | 4.97968  | -1.63909 | -0.70746 |
| C | 3.88062  | -2.51288 | 0.93965  |
| H | 4.44568  | -2.01649 | 1.73682  |
| H | 4.30034  | -3.51546 | 0.79522  |
| H | 2.84255  | -2.62045 | 1.26798  |
| C | 4.09048  | 0.86127  | -0.08966 |
| C | 5.55682  | 1.14307  | -0.11082 |
| H | 5.82037  | 1.86980  | -0.88986 |
| H | 5.90856  | 1.54849  | 0.84668  |
| H | 6.11656  | 0.22548  | -0.30742 |

4s\_Senantiomer\_conformer-102

|   |          |          |          |
|---|----------|----------|----------|
| C | -2.71191 | -0.58543 | 0.27249  |
| N | -2.98791 | 1.57967  | 0.78136  |
| H | -3.39150 | 2.42303  | 1.16649  |
| C | -1.81992 | 1.52231  | 0.09496  |
| C | -1.60562 | 0.18768  | -0.24947 |
| C | 0.49340  | 2.12464  | -0.44590 |
| C | -0.93183 | 2.66566  | -0.25860 |
| H | 0.90041  | 1.84176  | 0.52959  |
| H | 1.14509  | 2.91131  | -0.84198 |



|   |          |          |          |
|---|----------|----------|----------|
| H | -1.27888 | 3.14139  | -1.18831 |
| H | -0.95489 | 3.43983  | 0.51727  |
| C | -0.45292 | -0.21514 | -1.02635 |
| O | -0.27508 | -1.36562 | -1.44216 |
| C | 0.54544  | 0.90802  | -1.38796 |
| H | 0.21208  | 1.24161  | -2.38448 |
| C | 1.97679  | 0.38165  | -1.58091 |
| H | 1.92621  | -0.57281 | -2.13111 |
| H | 2.52139  | 1.09535  | -2.20926 |
| C | 3.04991  | -0.81333 | 1.84243  |
| C | 2.20809  | -0.76574 | 0.57255  |
| N | 2.73905  | 0.25034  | -0.33806 |
| C | 4.14729  | -0.02863 | -0.62060 |
| C | 4.94170  | -0.08981 | 0.67812  |
| O | 4.41923  | -1.08255 | 1.55619  |
| H | 2.70452  | -1.61473 | 2.50151  |
| H | 2.96199  | 0.14692  | 2.37601  |
| H | 1.17973  | -0.51276 | 0.84691  |
| H | 2.18915  | -1.76531 | 0.10063  |
| H | 4.54837  | 0.76873  | -1.25698 |
| H | 4.27057  | -0.98572 | -1.16439 |
| H | 5.98293  | -0.36066 | 0.48201  |
| H | 4.91725  | 0.89551  | 1.17068  |
| C | -2.91616 | -2.06512 | 0.11994  |
| H | -1.96534 | -2.58069 | 0.29394  |
| H | -3.61687 | -2.42188 | 0.88441  |
| C | -3.43863 | -2.45311 | -1.27255 |
| H | -3.58355 | -3.53727 | -1.34946 |
| H | -4.39729 | -1.96402 | -1.47987 |
| H | -2.72085 | -2.14747 | -2.03937 |
| C | -3.54947 | 0.30637  | 0.90649  |
| C | -4.83863 | 0.11318  | 1.63483  |
| H | -4.78493 | 0.48872  | 2.66470  |
| H | -5.66872 | 0.63377  | 1.14003  |
| H | -5.09323 | -0.94851 | 1.67901  |

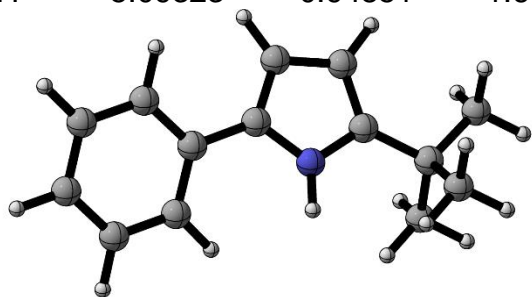

4t\_conformer-001

|   |          |         |          |
|---|----------|---------|----------|
| C | -0.52004 | 0.60021 | -0.08462 |
| C | 0.03611  | 1.85825 | -0.27780 |

|   |          |          |          |
|---|----------|----------|----------|
| C | 1.45045  | 1.71759  | -0.26241 |
| C | 1.74640  | 0.37875  | -0.05598 |
| N | 0.54047  | -0.28078 | 0.03762  |
| H | 0.44212  | -1.25830 | 0.26817  |
| H | -0.51923 | 2.77083  | -0.44735 |
| H | 2.17546  | 2.50783  | -0.39630 |
| C | -1.91287 | 0.16766  | -0.03196 |
| C | -2.93373 | 1.09816  | 0.24199  |
| C | -2.28141 | -1.17217 | -0.25632 |
| C | -4.26812 | 0.70423  | 0.28443  |
| H | -2.67035 | 2.13328  | 0.43738  |
| C | -3.61740 | -1.56598 | -0.20019 |
| H | -1.52376 | -1.91088 | -0.50257 |
| C | -4.61957 | -0.63156 | 0.06809  |
| H | -5.03710 | 1.44141  | 0.49851  |
| H | -3.87549 | -2.60629 | -0.37795 |
| H | -5.66040 | -0.93884 | 0.10796  |
| C | 3.17106  | -1.00329 | 1.46817  |
| H | 2.37142  | -1.73271 | 1.64004  |
| H | 4.12773  | -1.52873 | 1.56917  |
| H | 3.11000  | -0.24333 | 2.25456  |
| C | 3.15681  | -1.45240 | -1.01223 |
| H | 3.09113  | -1.01589 | -2.01467 |
| H | 4.11090  | -1.98561 | -0.92961 |
| H | 2.35268  | -2.19019 | -0.91190 |
| C | 3.06207  | -0.35444 | 0.07019  |
| C | 4.22344  | 0.63517  | -0.11443 |
| H | 4.19734  | 1.42245  | 0.64660  |
| H | 5.17985  | 0.10884  | -0.02658 |
| H | 4.18523  | 1.11055  | -1.10044 |

4t\_conformer-002

|   |          |          |          |
|---|----------|----------|----------|
| C | 0.52004  | 0.60021  | -0.08462 |
| C | -0.03611 | 1.85826  | -0.27780 |
| C | -1.45045 | 1.71759  | -0.26241 |
| C | -1.74640 | 0.37875  | -0.05598 |
| N | -0.54047 | -0.28077 | 0.03762  |
| H | -0.44212 | -1.25830 | 0.26816  |
| H | 0.51922  | 2.77083  | -0.44735 |
| H | -2.17546 | 2.50783  | -0.39629 |
| C | 1.91287  | 0.16766  | -0.03196 |
| C | 2.28141  | -1.17217 | -0.25632 |
| C | 2.93373  | 1.09816  | 0.24199  |
| C | 3.61739  | -1.56598 | -0.20019 |
| H | 1.52375  | -1.91087 | -0.50258 |

|   |          |          |          |
|---|----------|----------|----------|
| C | 4.26813  | 0.70422  | 0.28443  |
| H | 2.67036  | 2.13328  | 0.43738  |
| C | 4.61957  | -0.63157 | 0.06810  |
| H | 3.87548  | -2.60630 | -0.37795 |
| H | 5.03711  | 1.44140  | 0.49851  |
| H | 5.66039  | -0.93885 | 0.10796  |
| C | -3.15682 | -1.45239 | -1.01224 |
| H | -2.35270 | -2.19018 | -0.91192 |
| H | -4.11091 | -1.98559 | -0.92962 |
| H | -3.09114 | -1.01587 | -2.01467 |
| C | -3.17104 | -1.00331 | 1.46816  |
| H | -3.10998 | -0.24336 | 2.25456  |
| H | -4.12771 | -1.52876 | 1.56916  |
| H | -2.37141 | -1.73274 | 1.64001  |
| C | -3.06207 | -0.35444 | 0.07019  |
| C | -4.22344 | 0.63518  | -0.11441 |
| H | -4.18524 | 1.11056  | -1.10041 |
| H | -5.17985 | 0.10884  | -0.02656 |
| H | -4.19733 | 1.42244  | 0.64663  |

#### 4t\_conformer-003

|   |          |          |          |
|---|----------|----------|----------|
| C | 0.52004  | -0.60042 | -0.08458 |
| C | -0.03614 | -1.85844 | -0.27772 |
| C | -1.45050 | -1.71774 | -0.26234 |
| C | -1.74642 | -0.37889 | -0.05596 |
| N | -0.54046 | 0.28059  | 0.03763  |
| H | -0.44213 | 1.25813  | 0.26814  |
| H | 0.51916  | -2.77106 | -0.44719 |
| H | -2.17552 | -2.50798 | -0.39621 |
| C | 1.91285  | -0.16778 | -0.03195 |
| C | 2.93381  | -1.09818 | 0.24195  |
| C | 2.28121  | 1.17210  | -0.25629 |
| C | 4.26816  | -0.70408 | 0.28439  |
| H | 2.67057  | -2.13334 | 0.43726  |
| C | 3.61714  | 1.56607  | -0.20018 |
| H | 1.52343  | 1.91068  | -0.50248 |
| C | 4.61943  | 0.63176  | 0.06807  |
| H | 5.03724  | -1.44116 | 0.49842  |
| H | 3.87512  | 2.60641  | -0.37794 |
| H | 5.66021  | 0.93916  | 0.10792  |
| C | -3.17109 | 1.00300  | 1.46830  |
| H | -3.11023 | 0.24284  | 2.25451  |
| H | -2.37138 | 1.73226  | 1.64046  |
| H | -4.12770 | 1.52854  | 1.56932  |
| C | -3.15625 | 1.45275  | -1.01197 |

|   |          |          |          |
|---|----------|----------|----------|
| H | -3.09056 | 1.01647  | -2.01451 |
| H | -4.11016 | 1.98624  | -0.92936 |
| H | -2.35188 | 2.19022  | -0.91134 |
| C | -3.06200 | 0.35448  | 0.07018  |
| C | -4.22357 | -0.63480 | -0.11492 |
| H | -4.19775 | -1.42233 | 0.64587  |
| H | -5.17987 | -0.10829 | -0.02703 |
| H | -4.18533 | -1.10989 | -1.10106 |

4t\_conformer-004

|   |          |          |          |
|---|----------|----------|----------|
| C | -0.52004 | -0.60040 | -0.08458 |
| C | 0.03614  | -1.85843 | -0.27773 |
| C | 1.45050  | -1.71772 | -0.26234 |
| C | 1.74642  | -0.37888 | -0.05595 |
| N | 0.54046  | 0.28061  | 0.03765  |
| H | 0.44211  | 1.25815  | 0.26816  |
| H | -0.51916 | -2.77104 | -0.44721 |
| H | 2.17552  | -2.50796 | -0.39620 |
| C | -1.91286 | -0.16778 | -0.03195 |
| C | -2.93381 | -1.09818 | 0.24195  |
| C | -2.28122 | 1.17210  | -0.25630 |
| C | -4.26816 | -0.70408 | 0.28439  |
| H | -2.67057 | -2.13334 | 0.43727  |
| C | -3.61717 | 1.56607  | -0.20018 |
| H | -1.52345 | 1.91069  | -0.50249 |
| C | -4.61944 | 0.63175  | 0.06807  |
| H | -5.03724 | -1.44117 | 0.49843  |
| H | -3.87514 | 2.60641  | -0.37794 |
| H | -5.66023 | 0.93915  | 0.10792  |
| C | 3.17104  | 1.00321  | 1.46822  |
| H | 2.37136  | 1.73255  | 1.64022  |
| H | 3.11009  | 0.24317  | 2.25453  |
| H | 4.12767  | 1.52871  | 1.56921  |
| C | 4.22355  | -0.63488 | -0.11468 |
| H | 4.18539  | -1.11008 | -1.10077 |
| H | 5.17987  | -0.10840 | -0.02676 |
| H | 4.19761  | -1.42231 | 0.64620  |
| C | 3.06200  | 0.35449  | 0.07018  |
| C | 3.15639  | 1.45257  | -1.01214 |
| H | 2.35203  | 2.19010  | -0.91170 |
| H | 4.11032  | 1.98604  | -0.92953 |
| H | 3.09076  | 1.01613  | -2.01461 |

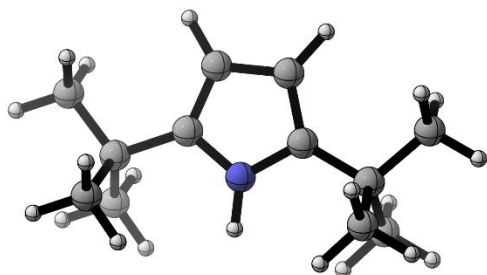

4u\_conformer-001

|   |          |          |          |
|---|----------|----------|----------|
| C | -1.14118 | -0.40363 | -0.00005 |
| C | -0.71454 | -1.71841 | -0.00003 |
| C | 0.71454  | -1.71841 | 0.00003  |
| C | 1.14118  | -0.40363 | 0.00005  |
| N | -0.00000 | 0.37694  | 0.00001  |
| H | -1.35661 | -2.58833 | -0.00006 |
| H | 1.35661  | -2.58833 | 0.00005  |
| H | -0.00000 | 1.38598  | 0.00000  |
| C | 2.52116  | 0.21362  | 0.00001  |
| C | -2.52116 | 0.21362  | -0.00001 |
| C | -2.70789 | 1.08853  | 1.25929  |
| H | -3.70997 | 1.53323  | 1.27051  |
| H | -2.58535 | 0.49060  | 2.16889  |
| H | -1.98020 | 1.90745  | 1.29281  |
| C | -3.58288 | -0.89738 | -0.00056 |
| H | -4.58609 | -0.45752 | -0.00053 |
| H | -3.48921 | -1.53274 | -0.88788 |
| H | -3.48945 | -1.53339 | 0.88631  |
| C | -2.70757 | 1.08951  | -1.25867 |
| H | -3.70969 | 1.53411  | -1.26984 |
| H | -1.97998 | 1.90854  | -1.29133 |
| H | -2.58471 | 0.49231  | -2.16871 |
| C | 2.70784  | 1.08864  | -1.25923 |
| H | 3.70993  | 1.53330  | -1.27047 |
| H | 2.58523  | 0.49078  | -2.16887 |
| H | 1.98018  | 1.90758  | -1.29263 |
| C | 2.70763  | 1.08941  | 1.25873  |
| H | 3.70974  | 1.53402  | 1.26989  |
| H | 1.98002  | 1.90843  | 1.29149  |
| H | 2.58481  | 0.49213  | 2.16873  |
| C | 3.58288  | -0.89738 | 0.00043  |
| H | 4.58609  | -0.45752 | 0.00038  |
| H | 3.48925  | -1.53280 | 0.88771  |
| H | 3.48941  | -1.53333 | -0.88648 |

4u\_conformer-002

|   |          |          |          |
|---|----------|----------|----------|
| C | -1.14120 | 0.40354  | 0.00025  |
| C | -0.71469 | 1.71834  | 0.00017  |
| C | 0.71473  | 1.71834  | -0.00018 |
| C | 1.14123  | 0.40355  | -0.00027 |
| N | 0.00002  | -0.37697 | -0.00004 |
| H | -1.35679 | 2.58824  | 0.00030  |
| H | 1.35684  | 2.58824  | -0.00030 |
| H | 0.00002  | -1.38599 | 0.00010  |
| C | 2.52116  | -0.21360 | -0.00003 |
| C | -2.52114 | -0.21360 | 0.00002  |
| C | -2.70843 | -1.08701 | -1.26027 |
| H | -3.71069 | -1.53125 | -1.27202 |
| H | -2.58568 | -0.48815 | -2.16922 |
| H | -1.98110 | -1.90618 | -1.29472 |
| C | -3.58273 | 0.89753  | 0.00229  |
| H | -4.58603 | 0.45788  | 0.00216  |
| H | -3.48861 | 1.53188  | 0.89026  |
| H | -3.48960 | 1.53454  | -0.88388 |
| C | -2.70719 | -1.09105 | 1.25768  |
| H | -3.70961 | -1.53493 | 1.26918  |
| H | -1.98023 | -1.91071 | 1.28858  |
| H | -2.58311 | -0.49525 | 2.16846  |
| C | 2.70836  | -1.08702 | 1.26026  |
| H | 3.71073  | -1.53100 | 1.27229  |
| H | 2.58519  | -0.48825 | 2.16922  |
| H | 1.98120  | -1.90635 | 1.29439  |
| C | 2.70723  | -1.09113 | -1.25762 |
| H | 3.70969  | -1.53491 | -1.26914 |
| H | 1.98035  | -1.91086 | -1.28836 |
| H | 2.58302  | -0.49544 | -2.16846 |
| C | 3.58270  | 0.89757  | -0.00231 |
| H | 4.58603  | 0.45798  | -0.00228 |
| H | 3.48845  | 1.53197  | -0.89024 |
| H | 3.48959  | 1.53453  | 0.88390  |

#### 4u\_conformer-003

|   |          |          |          |
|---|----------|----------|----------|
| C | 1.13994  | -0.36503 | -0.00001 |
| C | 0.71268  | -1.68266 | -0.00001 |
| C | -0.71267 | -1.68266 | -0.00000 |
| C | -1.13994 | -0.36503 | -0.00000 |
| N | 0.00000  | 0.41218  | -0.00001 |
| H | 1.35768  | -2.55198 | -0.00000 |
| H | -1.35768 | -2.55198 | 0.00001  |
| H | 0.00000  | 1.42002  | -0.00002 |
| C | -2.54060 | 0.21543  | 0.00000  |

|   |          |          |          |
|---|----------|----------|----------|
| C | 2.54060  | 0.21543  | -0.00000 |
| C | 2.50821  | 1.75390  | -0.00014 |
| H | 3.53021  | 2.14692  | -0.00015 |
| H | 2.00332  | 2.14732  | -0.89054 |
| H | 2.00327  | 2.14749  | 0.89015  |
| C | 3.29384  | -0.26916 | -1.25741 |
| H | 4.31877  | 0.12145  | -1.26713 |
| H | 3.34531  | -1.36266 | -1.28528 |
| H | 2.78790  | 0.06895  | -2.16857 |
| C | 3.29372  | -0.26893 | 1.25758  |
| H | 4.31865  | 0.12169  | 1.26732  |
| H | 2.78769  | 0.06934  | 2.16862  |
| H | 3.34520  | -1.36242 | 1.28564  |
| C | -2.50821 | 1.75390  | -0.00004 |
| H | -3.53021 | 2.14692  | -0.00004 |
| H | -2.00329 | 2.14743  | 0.89029  |
| H | -2.00331 | 2.14738  | -0.89040 |
| C | -3.29380 | -0.26908 | -1.25747 |
| H | -4.31873 | 0.12154  | -1.26719 |
| H | -2.78783 | 0.06909  | -2.16858 |
| H | -3.34527 | -1.36257 | -1.28541 |
| C | -3.29376 | -0.26901 | 1.25752  |
| H | -4.31869 | 0.12161  | 1.26725  |
| H | -3.34523 | -1.36251 | 1.28551  |
| H | -2.78776 | 0.06920  | 2.16860  |
